# Supplementary material for: Flexible response and rapid recovery strategies of the plateau forage Poa crymophila to cold and drought
Source: Front Plant Sci. 2022 Nov 8;13:970496. doi: 10.3389/fpls.2022.970496 (PMC9681527; doi:10.3389/fpls.2022.970496)
Supplement: Supplementary Table 2 — Gene Expression Clusters. [file Table_2.xlsx]

## Sheet: Cold
Table S2-1. Gene Expression Clusters in Cold Dataset
GeneID	Clusters	CK-1	CK-2	CK-3	CK_MEAN	Cold-1	Cold-2	Cold-3	Cold_MEAN	ReCold-1	ReCold-2	ReCold-3	ReCold_MEAN	Swissprot-annotation	GO-BiologicalProcess	GO-MolecularFunction	Go-CellularComponent
CL14018.Contig1_DB	1	5096.33	7885.88	6926.77	6636.33	4035.27	3919.77	3040.15	3665.06	8242.84	6924.19	9120.48	8095.84	Ribulose bisphosphate carboxylase/oxygenase activase A, chloroplastic OS=Hordeum vulgare GN=RCAA PE=2 SV=1	GO:0042742//defense response to bacterium;GO:0009416//response to light stimulus;GO:0009409//response to cold;GO:0050790//regulation of catalytic activity	GO:0046863//ribulose-1,5-bisphosphate carboxylase/oxygenase activator activity;GO:0043531//ADP binding;GO:0005524//ATP binding	GO:0005618//cell wall;GO:0009941//chloroplast envelope;GO:0009535//chloroplast thylakoid membrane;GO:0010287//plastoglobule;GO:0005634//nucleus;GO:0010319//stromule;GO:0048046//apoplast
CL7786.Contig1_DB	1	1123.6	1513.88	1254.99	1297.49	736.55	618.68	682.91	679.38	1866.74	1439.86	1941.05	1749.22	Probable aquaporin PIP1-2 OS=Oryza sativa subsp. japonica GN=PIP1-2 PE=2 SV=3	GO:0009414//response to water deprivation;GO:0006833//water transport;GO:0009651//response to salt stress	GO:0005215//transporter activity	GO:0009941//chloroplast envelope;GO:0005773//vacuole;GO:0046658//anchored to plasma membrane;GO:0016021//integral to membrane;GO:0005739//mitochondrion
Unigene5916_DB	1	592.98	1065.79	1076.59	911.787	549.26	481.17	510.39	513.607	1110.07	988.71	1652.23	1250.34	Serine hydroxymethyltransferase, mitochondrial OS=Solanum tuberosum PE=2 SV=1	GO:0006563//L-serine metabolic process;GO:0019684//photosynthesis, light reaction;GO:0009853//photorespiration;GO:0009697//salicylic acid biosynthetic process;GO:0042742//defense response to bacterium;GO:0035999//tetrahydrofolate interconversion;GO:0009814//defense response, incompatible interaction;GO:0032259//methylation;GO:0046686//response to cadmium ion;GO:0009409//response to cold;GO:000962…	GO:0005515//protein binding;GO:0008270//zinc ion binding;GO:0004372//glycine hydroxymethyltransferase activity;GO:0008168//methyltransferase activity;GO:0050897//cobalt ion binding;GO:0030170//pyridoxal phosphate binding;GO:0008266//poly(U) RNA binding	GO:0048046//apoplast;GO:0010319//stromule;GO:0022626//cytosolic ribosome;GO:0005759//mitochondrial matrix;GO:0005747//mitochondrial respiratory chain complex I;GO:0009570//chloroplast stroma;GO:0009534//chloroplast thylakoid;GO:0005886//plasma membrane;GO:0005634//nucleus
CL7737.Contig5_DB	1	552.1	1073.08	823.73	816.303	333.06	210.52	477.64	340.407	729.24	724.85	739.38	731.157	Geranylgeranyl diphosphate reductase, chloroplastic OS=Oryza sativa subsp. japonica GN=CHLP PE=2 SV=1	GO:0055114//oxidation-reduction process;GO:0015995//chlorophyll biosynthetic process;GO:0015979//photosynthesis	GO:0016628//oxidoreductase activity, acting on the CH-CH group of donors, NAD or NADP as acceptor;GO:0000166//nucleotide binding;GO:0045550//geranylgeranyl reductase activity	GO:0009941//chloroplast envelope;GO:0009535//chloroplast thylakoid membrane
CL7459.Contig1_DB	1	247.54	531.29	365.83	381.553	111.77	125.3	81.08	106.05	516.07	268.39	505.31	429.923	Ferric reduction oxidase 7, chloroplastic OS=Arabidopsis thaliana GN=FRO7 PE=2 SV=1	GO:0009767//photosynthetic electron transport chain;GO:0009416//response to light stimulus	GO:0000293//ferric-chelate reductase activity;GO:0005506//iron ion binding	GO:0005886//plasma membrane;GO:0016021//integral to membrane;GO:0009507//chloroplast
CL21972.Contig1_DB	1	268.16	531.71	299.06	366.31	141.82	144.44	156.52	147.593	401.69	302.54	785.7	496.643	Stem-specific protein TSJT1 OS=Nicotiana tabacum GN=TSJT1 PE=2 SV=1	GO:0009737//response to abscisic acid stimulus	-	GO:0005829//cytosol;GO:0005634//nucleus;GO:0005886//plasma membrane
CL7735.Contig1_DB	1	239.59	469.72	383.59	364.3	264.5	127.71	120.15	170.787	382.69	516.79	383.96	427.813	Chlorophyll a-b binding protein 4, chloroplastic OS=Arabidopsis thaliana GN=LHCA4 PE=1 SV=1	GO:0009765//photosynthesis, light harvesting;GO:0080167//response to karrikin	GO:0046872//metal ion binding	GO:0010287//plastoglobule;GO:0009941//chloroplast envelope;GO:0009535//chloroplast thylakoid membrane;GO:0005739//mitochondrion
CL6718.Contig1_DB	1	277.71	373.7	374.01	341.807	149.75	118.51	102.94	123.733	485.65	374.38	381.17	413.733	--	GO:0019761//glucosinolate biosynthetic process;GO:0046777//protein autophosphorylation;GO:0010155//regulation of proton transport	-	GO:0009507//chloroplast;GO:0016020//membrane
CL4458.Contig2_DB	1	252.85	408.62	226.24	295.903	131.17	112.66	145.02	129.617	445.7	365.45	517.29	442.813	Zinc finger CCCH domain-containing protein 33 OS=Oryza sativa subsp. japonica GN=Os05g0128200 PE=2 SV=1	GO:0044238//primary metabolic process;GO:0034645//cellular macromolecule biosynthetic process	GO:0008270//zinc ion binding;GO:0003677//DNA binding	GO:0005737//cytoplasm;GO:0005634//nucleus
CL5106.Contig2_DB	1	258.26	167.66	405.53	277.15	34.48	19.2	100.24	51.3067	228.94	299.29	187.98	238.737	Lichenase-2 (Fragment) OS=Hordeum vulgare PE=1 SV=1	GO:0005975//carbohydrate metabolic process;GO:0009409//response to cold;GO:0009617//response to bacterium;GO:0009817//defense response to fungus, incompatible interaction;GO:0009651//response to salt stress	GO:0042972	GO:0005773//vacuole;GO:0016023//cytoplasmic membrane-bounded vesicle;GO:0005886//plasma membrane;GO:0005618//cell wall;GO:0048046//apoplast
CL27894.Contig2_DB	1	223.59	271.8	269.53	254.973	98.62	67.2	71.51	79.11	397.54	354.68	362.96	371.727	Ammonium transporter 1 member 1 OS=Oryza sativa subsp. japonica GN=AMT1-1 PE=2 SV=1	GO:0051258//protein polymerization;GO:0072488//ammonium transmembrane transport;GO:0009737//response to abscisic acid stimulus;GO:0080167//response to karrikin;GO:0015843//methylammonium transport;GO:0009624//response to nematode	GO:0015398//high affinity secondary active ammonium transmembrane transporter activity	GO:0016021//integral to membrane;GO:0005634//nucleus;GO:0005886//plasma membrane
CL4743.Contig7_DB	1	387.71	201.62	138.96	242.763	83.34	104.2	221.33	136.29	369.14	308.02	356.53	344.563	Glycine-rich cell wall structural protein 1.8 OS=Phaseolus vulgaris PE=2 SV=1	-	-	GO:0016023//cytoplasmic membrane-bounded vesicle
CL17591.Contig1_DB	1	183.84	269.76	159.02	204.207	116.3	102.61	85.73	101.547	337.52	211.07	291.73	280.107	Zinc finger CCCH domain-containing protein 33 OS=Oryza sativa subsp. japonica GN=Os05g0128200 PE=2 SV=1	-	GO:0008270//zinc ion binding;GO:0003676//nucleic acid binding	-
CL311.Contig1_DB	1	163.37	233.99	202.67	200.01	58.01	60.64	78.37	65.6733	210.78	146.28	172.95	176.67	BTB/POZ domain-containing protein At5g67385 OS=Arabidopsis thaliana GN=At5g67385 PE=2 SV=2	-	-	-
CL6063.Contig3_DB	1	200.63	245.6	122.69	189.64	39.05	94.37	102.24	78.5533	200.48	154.64	209.69	188.27	Protein RAFTIN 1B OS=Triticum aestivum GN=RAFTIN1B PE=1 SV=1	GO:0009555//pollen development	-	-
CL3781.Contig1_DB	1	157.94	207.16	199.75	188.283	140.21	98.08	61.32	99.87	227.54	233.91	268.35	243.267	Formin-like protein 5 OS=Oryza sativa subsp. japonica GN=FH5 PE=2 SV=2	GO:0019252//starch biosynthetic process;GO:0000023//maltose metabolic process;GO:0019288//isopentenyl diphosphate biosynthetic process, mevalonate-independent pathway	-	GO:0009507//chloroplast;GO:0005634//nucleus
CL23720.Contig1_DB	1	181.61	174.5	186.07	180.727	52.54	51.5	51.57	51.87	181.14	177.02	116.84	158.333	Abscisic acid receptor PYL4 OS=Arabidopsis thaliana GN=PYL4 PE=1 SV=1	GO:0009738//abscisic acid mediated signaling pathway	-	-
CL17205.Contig1_DB	1	119.97	216.23	184.12	173.44	59.75	66.39	105.99	77.3767	162.24	155.15	215.59	177.66	indole-2-monooxygenase OS=Zea mays GN=CYP71C4 PE=1 SV=1	GO:0055114//oxidation-reduction process	GO:0009055//electron carrier activity;GO:0004497//monooxygenase activity;GO:0005506//iron ion binding;GO:0020037//heme binding;GO:0016705//oxidoreductase activity, acting on paired donors, with incorporation or reduction of molecular oxygen	GO:0016023//cytoplasmic membrane-bounded vesicle
CL22212.Contig3_DB	1	145.38	147.54	227.19	173.37	47.45	44.28	54.06	48.5967	268.32	100.35	228.81	199.16	Cysteine-rich repeat secretory protein 55 OS=Arabidopsis thaliana GN=CRRSP55 PE=2 SV=1	GO:0080167//response to karrikin	-	GO:0016023//cytoplasmic membrane-bounded vesicle
Unigene4630_DB	1	108.34	219.2	184.85	170.797	59.52	71.95	28.72	53.3967	271.41	138.03	208.02	205.82	Vegetative cell wall protein gp1 OS=Chlamydomonas reinhardtii GN=GP1 PE=2 SV=1	GO:0006629//lipid metabolic process	GO:0004806//triglyceride lipase activity	-
CL14018.Contig3_DB	1	118.58	214.14	174.69	169.137	49.46	59.55	65.85	58.2867	179.25	228.79	128.99	179.01	Ribulose bisphosphate carboxylase/oxygenase activase B, chloroplastic OS=Hordeum vulgare GN=RCAB PE=2 SV=1	GO:0042742//defense response to bacterium;GO:0009416//response to light stimulus;GO:0009409//response to cold;GO:0050790//regulation of catalytic activity	GO:0046863//ribulose-1,5-bisphosphate carboxylase/oxygenase activator activity;GO:0043531//ADP binding;GO:0005524//ATP binding	GO:0005618//cell wall;GO:0009941//chloroplast envelope;GO:0009535//chloroplast thylakoid membrane;GO:0010287//plastoglobule;GO:0005634//nucleus;GO:0010319//stromule;GO:0048046//apoplast
CL27579.Contig1_DB	1	112.85	200.94	184.29	166.027	42.23	16.87	22.05	27.05	158.08	106.25	128.16	130.83	Chloride channel protein CLC-b OS=Arabidopsis thaliana GN=CLC-B PE=1 SV=1	GO:0055085//transmembrane transport;GO:0015706//nitrate transport;GO:0006821//chloride transport;GO:0010167//response to nitrate	GO:0005247//voltage-gated chloride channel activity;GO:0009671//nitrate:hydrogen symporter activity	GO:0016021//integral to membrane;GO:0009705//plant-type vacuole membrane;GO:0005634//nucleus
CL18065.Contig1_DB	1	98.1	176.86	205.62	160.193	103.8	67.41	73.65	81.62	187.4	191.99	190.52	189.97	Thylakoid lumenal 19 kDa protein, chloroplastic OS=Arabidopsis thaliana GN=At3g63540 PE=1 SV=2	GO:0015979//photosynthesis	GO:0005509//calcium ion binding	GO:0009654//oxygen evolving complex;GO:0009536//plastid;GO:0019898//extrinsic to membrane
CL138.Contig1_DB	1	105.49	184.7	151.08	147.09	74.14	99.13	88.25	87.1733	231.01	187.32	165.16	194.497	Light-regulated protein OS=Oryza sativa subsp. japonica GN=LIR1 PE=2 SV=1	-	-	-
CL16033.Contig1_DB	1	164.86	53.73	221.46	146.683	45.97	34.02	37.23	39.0733	158.99	120.65	138.04	139.227	GDSL esterase/lipase At5g45910 OS=Arabidopsis thaliana GN=At5g45910 PE=2 SV=1	GO:0006629//lipid metabolic process	GO:0016788//hydrolase activity, acting on ester bonds	GO:0016023//cytoplasmic membrane-bounded vesicle
Unigene33126_DB	1	150.68	137.02	143.86	143.853	59.29	35.76	50.87	48.64	142.64	229.37	129.88	167.297	Probable aquaporin PIP2-6 OS=Oryza sativa subsp. japonica GN=PIP2-6 PE=2 SV=2	GO:0006810//transport;GO:0009737//response to abscisic acid stimulus	GO:0005215//transporter activity	GO:0005773//vacuole;GO:0046658//anchored to plasma membrane;GO:0016021//integral to membrane;GO:0005634//nucleus
CL4923.Contig2_DB	1	156.12	156.28	116.34	142.913	63.24	77.04	65.06	68.4467	155.52	156.36	237.28	183.053	NAC transcription factor NAM-2 OS=Hordeum vulgare var. distichum GN=NAM-2 PE=4 SV=1	-	-	-
CL22147.Contig4_DB	1	159.36	138.26	123.46	140.36	66.03	50.36	76.34	64.2433	257.69	194.13	190.7	214.173	Histone H4 OS=Glycine max PE=3 SV=1	GO:0009414//response to water deprivation;GO:0006334//nucleosome assembly	GO:0003677//DNA binding;GO:0046982//protein heterodimerization activity	GO:0005829//cytosol;GO:0000786//nucleosome;GO:0005739//mitochondrion;GO:0005730//nucleolus;GO:0009506//plasmodesma;GO:0005774//vacuolar membrane;GO:0009579//thylakoid;GO:0009507//chloroplast;GO:0005794//Golgi apparatus;GO:0005886//plasma membrane
CL15621.Contig1_DB	1	62.66	219.06	137.19	139.637	49.09	37.43	46.84	44.4533	114.81	134.67	174.36	141.28	Protein TIC 62, chloroplastic OS=Arabidopsis thaliana GN=TIC62 PE=1 SV=1	GO:0016556//mRNA modification;GO:0019684//photosynthesis, light reaction;GO:0010103//stomatal complex morphogenesis	-	GO:0009941//chloroplast envelope;GO:0009535//chloroplast thylakoid membrane
CL1412.Contig1_DB	1	114.55	154.6	144.5	137.883	58.84	75.73	52.06	62.21	273.69	148.85	199.81	207.45	Chaperone protein dnaJ 20, chloroplastic OS=Arabidopsis thaliana GN=ATJ20 PE=2 SV=2	-	-	GO:0009536//plastid
CL22147.Contig3_DB	1	155.52	129.56	106.54	130.54	41.88	49.23	65.42	52.1767	212.89	173.12	167.21	184.407	Histone H4 OS=Glycine max PE=3 SV=1	GO:0009414//response to water deprivation;GO:0006334//nucleosome assembly	GO:0003677//DNA binding;GO:0046982//protein heterodimerization activity	GO:0005829//cytosol;GO:0000786//nucleosome;GO:0005739//mitochondrion;GO:0005730//nucleolus;GO:0009506//plasmodesma;GO:0005774//vacuolar membrane;GO:0009579//thylakoid;GO:0009507//chloroplast;GO:0005794//Golgi apparatus;GO:0005886//plasma membrane
Unigene37362_DB	1	78.47	166.79	144.72	129.993	36.9	45.31	29.9	37.37	210.72	122.34	197.4	176.82	--	GO:0006629//lipid metabolic process	GO:0004806//triglyceride lipase activity	-
Unigene1297_DB	1	115.55	146.74	123.1	128.463	44.88	30.85	42.22	39.3167	212.45	207.03	211.81	210.43	Aquaporin PIP1-5 OS=Zea mays GN=PIP1-5 PE=2 SV=1	GO:0009414//response to water deprivation;GO:0006833//water transport;GO:0009651//response to salt stress	GO:0005215//transporter activity	GO:0009941//chloroplast envelope;GO:0005773//vacuole;GO:0046658//anchored to plasma membrane;GO:0016021//integral to membrane;GO:0005739//mitochondrion
CL2655.Contig6_DB	1	51.03	162.55	130.68	114.753	56.42	49.57	41.51	49.1667	104.44	127.05	102.75	111.413	Nuclear transcription factor Y subunit C-4 OS=Arabidopsis thaliana GN=NFYC4 PE=2 SV=1	GO:0009738//abscisic acid mediated signaling pathway;GO:0045893//positive regulation of transcription, DNA-dependent	GO:0043565//sequence-specific DNA binding;GO:0003700//sequence-specific DNA binding transcription factor activity;GO:0046982//protein heterodimerization activity	GO:0016602//CCAAT-binding factor complex
Unigene4877_DB	1	92.26	121.09	126.43	113.26	47.5	34.94	42.64	41.6933	183.7	228.53	143.93	185.387	Probable aquaporin PIP2-6 OS=Oryza sativa subsp. japonica GN=PIP2-6 PE=2 SV=2	GO:0009624//response to nematode;GO:0009269//response to desiccation;GO:0006833//water transport;GO:0006970//response to osmotic stress;GO:0080170//hydrogen peroxide transmembrane transport;GO:0009737//response to abscisic acid stimulus	GO:0005215//transporter activity	GO:0005773//vacuole;GO:0046658//anchored to plasma membrane;GO:0016021//integral to membrane;GO:0009507//chloroplast;GO:0005634//nucleus
CL10994.Contig2_DB	1	98.45	100.12	111.87	103.48	46.39	29.58	63.83	46.6	114.43	164.05	102.49	126.99	5-methyltetrahydropteroyltriglutamate--homocysteine methyltransferase OS=Mesembryanthemum crystallinum GN=METE PE=2 SV=1	GO:0009086//methionine biosynthetic process;GO:0009651//response to salt stress;GO:0032259//methylation;GO:0010043//response to zinc ion;GO:0046686//response to cadmium ion	GO:0005507//copper ion binding;GO:0008705//methionine synthase activity;GO:0008270//zinc ion binding;GO:0003871//5-methyltetrahydropteroyltriglutamate-homocysteine S-methyltransferase activity	GO:0005829//cytosol;GO:0005777//peroxisome;GO:0009941//chloroplast envelope;GO:0009570//chloroplast stroma;GO:0005886//plasma membrane;GO:0048046//apoplast
CL684.Contig1_DB	1	114.41	101.9	89.46	101.923	52.58	47.62	63.41	54.5367	115.43	110.74	148.28	124.817	Eukaryotic translation initiation factor 5 OS=Zea mays GN=EIF5 PE=2 SV=1	GO:0006413//translational initiation;GO:0016070//RNA metabolic process	GO:0005525//GTP binding;GO:0003743//translation initiation factor activity	GO:0005737//cytoplasm;GO:0005634//nucleus
CL8213.Contig2_DB	1	94.69	95.66	106.09	98.8133	27.67	27.45	41.23	32.1167	82.88	107.35	81.56	90.5967	--	GO:0031323//regulation of cellular metabolic process;GO:0007165//signal transduction;GO:0006952//defense response;GO:0019538//protein metabolic process	GO:0008233//peptidase activity	GO:0009536//plastid
CL12996.Contig2_DB	1	47.52	154.6	94.29	98.8033	12.9	17.25	20.34	16.83	125.44	89.7	130.91	115.35	indole-2-monooxygenase OS=Zea mays GN=CYP71C4 PE=1 SV=1	GO:0055114//oxidation-reduction process	GO:0036190;GO:0009055//electron carrier activity;GO:0005506//iron ion binding;GO:0020037//heme binding	GO:0016023//cytoplasmic membrane-bounded vesicle;GO:0016021//integral to membrane
CL9618.Contig6_DB	1	66.4	147.64	76.26	96.7667	27.42	13.39	17.76	19.5233	64.47	77.24	127.31	89.6733	Leucine-rich repeat extensin-like protein 5 OS=Arabidopsis thaliana GN=LRX5 PE=2 SV=2	GO:0006725//cellular aromatic compound metabolic process	GO:0016787//hydrolase activity	-
CL14871.Contig2_DB	1	73.03	117.57	97.25	95.95	26.13	14.12	38.31	26.1867	78.05	140.93	116.53	111.837	--	-	GO:0003682//chromatin binding;GO:0003677//DNA binding	-
CL12992.Contig2_DB	1	69.14	129.61	83.78	94.1767	35.24	24.81	30.98	30.3433	71.33	115.92	76.04	87.7633	Leucine-rich repeat extensin-like protein 3 OS=Arabidopsis thaliana GN=LRX3 PE=1 SV=1	-	-	-
CL3989.Contig1_DB	1	64.16	88.38	129.71	94.0833	27.88	45.61	43.47	38.9867	105.44	87.47	158.64	117.183	Bifunctional aspartokinase/homoserine dehydrogenase 2, chloroplastic OS=Zea mays GN=AKHSDH2 PE=2 SV=1	GO:0009088//threonine biosynthetic process;GO:0009086//methionine biosynthetic process;GO:0055114//oxidation-reduction process;GO:0009089//lysine biosynthetic process via diaminopimelate;GO:0016310//phosphorylation;GO:0006418//tRNA aminoacylation for protein translation	GO:0004412//homoserine dehydrogenase activity;GO:0004072//aspartate kinase activity;GO:0005524//ATP binding;GO:0004812//aminoacyl-tRNA ligase activity;GO:0016597//amino acid binding;GO:0050661//NADP binding	GO:0009570//chloroplast stroma
CL22925.Contig1_DB	1	101.06	77.31	98.42	92.2633	33.01	39.64	38.57	37.0733	130.09	91.3	106.24	109.21	Vegetative cell wall protein gp1 OS=Chlamydomonas reinhardtii GN=GP1 PE=2 SV=1	GO:0019243//methylglyoxal catabolic process to D-lactate	-	GO:0009505//plant-type cell wall;GO:0016023//cytoplasmic membrane-bounded vesicle;GO:0005886//plasma membrane;GO:0005774//vacuolar membrane;GO:0005576//extracellular region
CL8189.Contig1_DB	1	60.83	111.41	100.16	90.8	17.57	15.65	12.91	15.3767	94.59	63.19	79.71	79.1633	Chloride channel protein CLC-a OS=Arabidopsis thaliana GN=CLC-A PE=1 SV=2	GO:0055085//transmembrane transport;GO:0015706//nitrate transport;GO:0006821//chloride transport;GO:0010167//response to nitrate	GO:0005247//voltage-gated chloride channel activity;GO:0009671//nitrate:hydrogen symporter activity	GO:0016021//integral to membrane;GO:0009705//plant-type vacuole membrane
CL13735.Contig1_DB	1	87.57	95.53	85.47	89.5233	16.94	8.74	12.64	12.7733	65.28	110.67	59.18	78.3767	Pollen-specific leucine-rich repeat extensin-like protein 1 OS=Arabidopsis thaliana GN=PEX1 PE=2 SV=1	-	-	-
CL7539.Contig2_DB	1	76.64	79.73	108.76	88.3767	31.82	17.09	32.64	27.1833	72.64	106.79	70.62	83.35	Peptidyl-prolyl cis-trans isomerase, chloroplastic OS=Spinacia oleracea GN=TLP40 PE=1 SV=1	GO:0009697//salicylic acid biosynthetic process;GO:0016117//carotenoid biosynthetic process;GO:0010363//regulation of plant-type hypersensitive response;GO:0010200//response to chitin;GO:0031348//negative regulation of defense response;GO:0050832//defense response to fungus;GO:0006098//pentose-phosphate shunt;GO:0000413//protein peptidyl-prolyl isomerization;GO:0009867//jasmonic acid mediated sig…	GO:0003755//peptidyl-prolyl cis-trans isomerase activity	GO:0009570//chloroplast stroma;GO:0009543//chloroplast thylakoid lumen;GO:0009535//chloroplast thylakoid membrane
CL11709.Contig2_DB	1	158.23	52.22	48.52	86.3233	34.22	28.26	61.51	41.33	113.6	74.57	124.48	104.217	--	GO:0008152//metabolic process	GO:0030414//peptidase inhibitor activity	-
CL18844.Contig2_DB	1	73.16	92.13	92.47	85.92	31.03	24.63	51.05	35.57	97.32	101.07	118.36	105.583	UDP-glycosyltransferase 75D1 OS=Arabidopsis thaliana GN=UGT75D1 PE=2 SV=2	-	GO:0016757//transferase activity, transferring glycosyl groups	-
CL5543.Contig1_DB	1	81.53	106.74	64.08	84.1167	29.14	14.34	24.54	22.6733	59.35	96.81	52.3	69.4867	--	-	-	-
Unigene1636_DB	1	65.39	120.17	65.74	83.7667	28.44	21.43	53.08	34.3167	66.56	89.64	85.73	80.6433	--	-	-	-
CL19183.Contig1_DB	1	87.82	61.45	99.33	82.8667	66.95	31.74	39.77	46.1533	101.24	130.6	84.8	105.547	Nascent polypeptide-associated complex subunit alpha-like protein 2 OS=Arabidopsis thaliana GN=At3g49470 PE=2 SV=2	-	GO:0016787//hydrolase activity	-
CL3039.Contig1_DB	1	67.49	79.92	94.94	80.7833	19.23	19.1	25.35	21.2267	136.42	109.48	87.87	111.257	Protein ASPARTIC PROTEASE IN GUARD CELL 1 OS=Arabidopsis thaliana GN=ASPG1 PE=1 SV=1	-	GO:0008233//peptidase activity	GO:0016023//cytoplasmic membrane-bounded vesicle
CL4218.Contig2_DB	1	52.74	106.3	80.08	79.7067	22.18	32.39	37.18	30.5833	76.97	85.25	87.41	83.21	Zinc finger protein ZAT5 OS=Arabidopsis thaliana GN=ZAT5 PE=2 SV=1	-	-	-
CL4351.Contig1_DB	1	64.04	108.32	65.25	79.2033	21.17	15.69	48.77	28.5433	79.31	93	112.46	94.9233	Anaphase-promoting complex subunit 7 OS=Arabidopsis thaliana GN=APC7 PE=2 SV=1	GO:0006355//regulation of transcription, DNA-dependent;GO:0051276//chromosome organization;GO:0006259//DNA metabolic process;GO:0050896//response to stimulus;GO:0070647//protein modification by small protein conjugation or removal;GO:0007126//meiosis;GO:0048522//positive regulation of cellular process;GO:0051128//regulation of cellular component organization	-	-
CL9056.Contig1_DB	1	102.1	87.27	45.88	78.4167	21.47	41.61	67.4	43.4933	75.31	120.28	101.89	99.16	Betaine aldehyde dehydrogenase OS=Hordeum vulgare PE=2 SV=1	GO:0019285//glycine betaine biosynthetic process from choline;GO:0055114//oxidation-reduction process	GO:0019145//aminobutyraldehyde dehydrogenase activity;GO:0033737//1-pyrroline dehydrogenase activity;GO:0008802//betaine-aldehyde dehydrogenase activity	GO:0005777//peroxisome;GO:0005618//cell wall
CL13735.Contig2_DB	1	87.74	80.26	65.89	77.9633	11.62	7.61	16.4	11.8767	61.59	106.72	70.91	79.74	Pollen-specific leucine-rich repeat extensin-like protein 1 OS=Arabidopsis thaliana GN=PEX1 PE=2 SV=1	-	-	-
Unigene30671_DB	1	73.12	105.32	52.81	77.0833	31.14	26.47	51.45	36.3533	158.03	83.2	115.1	118.777	Zinc finger CCCH domain-containing protein 33 OS=Oryza sativa subsp. japonica GN=Os05g0128200 PE=2 SV=1	GO:0006944//cellular membrane fusion;GO:0010363//regulation of plant-type hypersensitive response;GO:0002679//respiratory burst involved in defense response;GO:0010200//response to chitin;GO:0006355//regulation of transcription, DNA-dependent;GO:0006612//protein targeting to membrane;GO:0050832//defense response to fungus;GO:0043069//negative regulation of programmed cell death;GO:0043090//amino …	GO:0008270//zinc ion binding;GO:0003677//DNA binding;GO:0003700//sequence-specific DNA binding transcription factor activity	GO:0005634//nucleus
CL5122.Contig1_DB	1	44.88	99.19	86.68	76.9167	42.58	50.32	19.57	37.49	124.98	68.84	98.67	97.4967	Lipoxygenase 2.3, chloroplastic OS=Hordeum vulgare GN=LOX2.3 PE=1 SV=1	GO:0031408//oxylipin biosynthetic process;GO:0055114//oxidation-reduction process	GO:0005506//iron ion binding;GO:0016165//lipoxygenase activity	GO:0009536//plastid
Unigene31718_DB	1	71.19	63.94	89.65	74.9267	38.6	23.39	14.9	25.63	121.53	92.31	132.17	115.337	Aquaporin PIP2-5 OS=Zea mays GN=PIP2-5 PE=1 SV=1	GO:0009624//response to nematode;GO:0009269//response to desiccation;GO:0006833//water transport;GO:0006970//response to osmotic stress;GO:0080170//hydrogen peroxide transmembrane transport;GO:0009737//response to abscisic acid stimulus	GO:0005215//transporter activity	GO:0005773//vacuole;GO:0005886//plasma membrane;GO:0016021//integral to membrane;GO:0009507//chloroplast
CL5569.Contig1_DB	1	70.12	78.9	75.45	74.8233	11.13	19.26	37.02	22.47	73.74	57.92	108.41	80.0233	Pollen-specific leucine-rich repeat extensin-like protein 1 OS=Arabidopsis thaliana GN=PEX1 PE=2 SV=1	-	-	-
CL21896.Contig3_DB	1	58.96	80.53	82.86	74.1167	22.75	33.34	30.5	28.8633	80.58	73.87	70.44	74.9633	Arginine/serine-rich protein 45 OS=Arabidopsis thaliana GN=SR45 PE=1 SV=1	-	GO:0003824//catalytic activity	-
CL11411.Contig1_DB	1	43.04	112.5	65.62	73.72	32.27	35.9	41.3	36.49	82.59	84.37	113.46	93.4733	Protein LURP-one-related 5 OS=Arabidopsis thaliana GN=At1g80120 PE=1 SV=1	-	-	-
CL3469.Contig2_DB	1	82.02	70.43	64.84	72.43	22.48	23.7	25.88	24.02	68.03	54.43	66.52	62.9933	Expansin-like A1 OS=Oryza sativa subsp. japonica GN=EXLA1 PE=2 SV=1	GO:0006355//regulation of transcription, DNA-dependent;GO:0007165//signal transduction	-	GO:0009505//plant-type cell wall;GO:0016023//cytoplasmic membrane-bounded vesicle;GO:0005576//extracellular region;GO:0016020//membrane
CL20860.Contig1_DB	1	50.16	95.19	68.35	71.2333	18.15	46.42	32.04	32.2033	92.49	86.94	110.26	96.5633	GDSL esterase/lipase At5g55050 OS=Arabidopsis thaliana GN=At5g55050 PE=2 SV=1	GO:0006629//lipid metabolic process	GO:0016788//hydrolase activity, acting on ester bonds	GO:0016023//cytoplasmic membrane-bounded vesicle
CL8220.Contig2_DB	1	72.9	60.84	78.86	70.8667	14.66	8.48	24.03	15.7233	55.52	170.73	73.94	100.063	Glucuronoxylan 4-O-methyltransferase 2 OS=Arabidopsis thaliana GN=GXM2 PE=1 SV=1	GO:0010054//trichoblast differentiation;GO:0045491//xylan metabolic process	GO:0030775//glucuronoxylan 4-O-methyltransferase activity	GO:0005794//Golgi apparatus
CL19661.Contig2_DB	1	51.71	76.08	80.95	69.58	9.53	13.81	12.31	11.8833	84.39	104.25	65.69	84.7767	Formin-like protein 20 OS=Arabidopsis thaliana GN=FH20 PE=2 SV=3	-	-	GO:0009536//plastid
CL24505.Contig2_DB	1	78.14	67.36	59.72	68.4067	28.07	40.64	38.25	35.6533	110.63	47.3	82.45	80.1267	--	GO:0008152//metabolic process	GO:0004328//formamidase activity	GO:0005773//vacuole
CL6671.Contig3_DB	1	70.78	44.84	87.91	67.8433	30.95	18.63	26.43	25.3367	78.68	128.22	97.55	101.483	Branched-chain-amino-acid aminotransferase-like protein 3, chloroplastic OS=Arabidopsis thaliana GN=At5g57850 PE=2 SV=1	GO:0008152//metabolic process	GO:0008483//transaminase activity	-
CL26068.Contig1_DB	1	51.62	71.7	78.66	67.3267	48.63	32.5	24.8	35.31	92.65	79.45	106.19	92.7633	Peptidyl-prolyl cis-trans isomerase FKBP16-2, chloroplastic OS=Arabidopsis thaliana GN=FKBP16-2 PE=1 SV=1	GO:0006457//protein folding;GO:0000413//protein peptidyl-prolyl isomerization	GO:0005528//FK506 binding;GO:0005515//protein binding;GO:0031679//NADH dehydrogenase (plastoquinone) activity;GO:0003755//peptidyl-prolyl cis-trans isomerase activity	GO:0010598//NAD(P)H dehydrogenase complex (plastoquinone);GO:0009543//chloroplast thylakoid lumen;GO:0005576//extracellular region;GO:0009535//chloroplast thylakoid membrane
CL2084.Contig3_DB	1	74.58	68.05	58.8	67.1433	25.58	17.77	15.66	19.67	55.67	45.78	78.94	60.13	NAC transcription factor NAM-1 OS=Hordeum vulgare var. distichum GN=NAM-1 PE=4 SV=1	GO:0006355//regulation of transcription, DNA-dependent	GO:0003677//DNA binding	-
CL10052.Contig1_DB	1	67.23	74.89	58.72	66.9467	27.52	16.48	27.85	23.95	70.53	64.98	45.93	60.48	--	-	-	-
CL17945.Contig1_DB	1	87.57	57.84	52.29	65.9	21.39	22.75	34.34	26.16	63.27	44.79	59.3	55.7867	Uncharacterized protein At1g15400 OS=Arabidopsis thaliana GN=At1g15400 PE=1 SV=2	-	-	-
CL6209.Contig1_DB	1	38.96	89.27	64.62	64.2833	12	26.85	26.9	21.9167	76.7	40.5	112.76	76.6533	MLO-like protein 1 OS=Arabidopsis thaliana GN=MLO1 PE=1 SV=1	GO:0008219//cell death;GO:0050896//response to stimulus	-	GO:0016023//cytoplasmic membrane-bounded vesicle;GO:0016021//integral to membrane
CL5654.Contig2_DB	1	68.52	88.53	34.93	63.9933	12.27	8.23	17.88	12.7933	61.34	62.68	58.08	60.7	--	-	-	-
Unigene35595_DB	1	58.37	66.22	60.53	61.7067	14.03	14.32	12.67	13.6733	51.34	60.08	53.81	55.0767	Coiled-coil domain-containing protein lobo homolog (Fragment) OS=Chlamydomonas reinhardtii GN=FAP50 PE=2 SV=1	-	GO:0016787//hydrolase activity	-
CL7363.Contig3_DB	1	44.5	66.29	70.29	60.36	33.72	18.42	21.06	24.4	41.93	61.85	62.73	55.5033	--	-	-	-
CL8870.Contig1_DB	1	67.01	71.06	41.5	59.8567	26.11	28.31	40.35	31.59	91.16	63.01	100	84.7233	Oryzain alpha chain OS=Oryza sativa subsp. japonica GN=Os04g0650000 PE=1 SV=2	GO:0006508//proteolysis	GO:0008234//cysteine-type peptidase activity	-
Unigene1343_DB	1	29.03	92.89	53.09	58.3367	21.02	28.11	47.04	32.0567	62.65	54.75	92.39	69.93	GTP cyclohydrolase 1 (Fragment) OS=Euglena gracilis PE=3 SV=1	GO:0046654//tetrahydrofolate biosynthetic process	GO:0003934//GTP cyclohydrolase I activity	GO:0005739//mitochondrion
Unigene30629_DB	1	11.65	102.95	60.14	58.2467	28.12	20.05	16.51	21.56	73.1	84.76	80.9	79.5867	Ribulose bisphosphate carboxylase/oxygenase activase B, chloroplastic OS=Hordeum vulgare GN=RCAB PE=2 SV=1	-	GO:0005524//ATP binding	GO:0009570//chloroplast stroma
CL4650.Contig1_DB	1	59.32	41.05	73.47	57.9467	40.47	21.52	27.72	29.9033	62.15	68.48	70.75	67.1267	Formin-like protein 20 OS=Arabidopsis thaliana GN=FH20 PE=2 SV=3	-	-	GO:0005634//nucleus;GO:0005739//mitochondrion;GO:0009507//chloroplast
CL18992.Contig3_DB	1	55.28	46.35	70.56	57.3967	24.66	22.21	20.33	22.4	53.11	56.67	53.81	54.53	Auxin response factor 17 OS=Oryza sativa subsp. japonica GN=ARF17 PE=2 SV=1	GO:0006355//regulation of transcription, DNA-dependent;GO:0009908//flower development;GO:0009734//auxin mediated signaling pathway	GO:0003677//DNA binding;GO:0046983//protein dimerization activity	GO:0005634//nucleus
CL16955.Contig1_DB	1	36.86	79.8	54.69	57.1167	30.44	39.81	18.53	29.5933	72.92	51.1	82.83	68.95	Farnesyl pyrophosphate synthase OS=Zea mays GN=FPS PE=2 SV=1	GO:0033384//geranyl diphosphate biosynthetic process;GO:0006695//cholesterol biosynthetic process;GO:0045337//farnesyl diphosphate biosynthetic process	GO:0046872//metal ion binding;GO:0004337//geranyltranstransferase activity;GO:0004161//dimethylallyltranstransferase activity	GO:0005737//cytoplasm
CL25968.Contig5_DB	1	23.8	98.04	48.01	56.6167	15.29	16.72	12.77	14.9267	50.34	44.44	76.43	57.07	UDP-glycosyltransferase 91C1 OS=Arabidopsis thaliana GN=UGT91C1 PE=2 SV=1	-	GO:0016757//transferase activity, transferring glycosyl groups	GO:0009536//plastid
CL27785.Contig1_DB	1	52.06	59.45	56.35	55.9533	29.03	20.69	33.31	27.6767	92.4	79.61	82.22	84.7433	Oligopeptide transporter 3 OS=Arabidopsis thaliana GN=OPT3 PE=2 SV=3	GO:0009825//multidimensional cell growth;GO:0055085//transmembrane transport;GO:0048767//root hair elongation;GO:0000271//polysaccharide biosynthetic process;GO:0009932//cell tip growth;GO:0071555//cell wall organization;GO:0006857//oligopeptide transport;GO:0006875//cellular metal ion homeostasis;GO:0043481//anthocyanin accumulation in tissues in response to UV light;GO:0010817//regulation of ho…	GO:0015198//oligopeptide transporter activity	GO:0009506//plasmodesma;GO:0016023//cytoplasmic membrane-bounded vesicle;GO:0016020//membrane
Unigene44587_DB	1	52.39	40.82	69.75	54.32	11.89	26.08	30.22	22.73	77.48	55.15	64.49	65.7067	ABC transporter G family member 11 OS=Arabidopsis thaliana GN=ABCG11 PE=1 SV=1	GO:0006200//ATP catabolic process;GO:0080051//cutin transport	GO:0015416//organic phosphonate transmembrane-transporting ATPase activity;GO:0005524//ATP binding	GO:0009897//external side of plasma membrane
CL16156.Contig1_DB	1	48.17	59.42	54.88	54.1567	15.19	13.49	14.12	14.2667	49.88	41.03	47.32	46.0767	Chloride channel protein CLC-c OS=Arabidopsis thaliana GN=CLC-C PE=1 SV=1	GO:0055085//transmembrane transport;GO:0006821//chloride transport	GO:0005247//voltage-gated chloride channel activity;GO:0005515//protein binding	GO:0005622//intracellular;GO:0016021//integral to membrane
CL14003.Contig2_DB	1	24.85	78.17	58.55	53.8567	25.9	14.64	23.89	21.4767	61.09	63.28	55.76	60.0433	Peroxidase 70 OS=Zea mays GN=PER70 PE=1 SV=1	GO:0006979//response to oxidative stress;GO:0055114//oxidation-reduction process	GO:0046872//metal ion binding;GO:0020037//heme binding;GO:0004601//peroxidase activity	GO:0016023//cytoplasmic membrane-bounded vesicle
CL18948.Contig1_DB	1	66.76	45.95	47.75	53.4867	25.41	5.45	20.62	17.16	52.8	64.82	40.75	52.79	Zinc finger protein 7 OS=Arabidopsis thaliana GN=ZFP7 PE=2 SV=1	-	GO:0008270//zinc ion binding	GO:0005622//intracellular
CL28290.Contig2_DB	1	48.41	67.59	44.03	53.3433	25.35	19.65	25.86	23.62	57.3	56.44	54.8	56.18	Ent-isokaurene C2-hydroxylase OS=Oryza sativa subsp. japonica GN=CYP71Z6 PE=1 SV=1	GO:0055114//oxidation-reduction process	GO:0009055//electron carrier activity;GO:0004497//monooxygenase activity;GO:0005506//iron ion binding;GO:0020037//heme binding;GO:0016705//oxidoreductase activity, acting on paired donors, with incorporation or reduction of molecular oxygen	GO:0016023//cytoplasmic membrane-bounded vesicle
Unigene43808_DB	1	57.35	37.39	59.71	51.4833	15.96	8.56	19.35	14.6233	44.7	59.75	34.49	46.3133	Receptor-like protein kinase HSL1 OS=Arabidopsis thaliana GN=HSL1 PE=2 SV=1	GO:0010103//stomatal complex morphogenesis;GO:0010363//regulation of plant-type hypersensitive response;GO:0006612//protein targeting to membrane;GO:0010051//xylem and phloem pattern formation;GO:0006468//protein phosphorylation;GO:0000165//MAPK cascade;GO:0009963//positive regulation of flavonoid biosynthetic process;GO:0002237//response to molecule of bacterial origin;GO:0048443//stamen develop…	GO:0016491//oxidoreductase activity;GO:0004674//protein serine/threonine kinase activity;GO:0005524//ATP binding	GO:0016023//cytoplasmic membrane-bounded vesicle;GO:0016021//integral to membrane;GO:0005886//plasma membrane
CL24140.Contig1_DB	1	57.51	47.69	48.25	51.15	6.35	7.75	8.21	7.43667	101.41	90.15	31.43	74.33	F-box/kelch-repeat protein At1g80440 OS=Arabidopsis thaliana GN=At1g80440 PE=2 SV=1	-	-	-
CL18415.Contig2_DB	1	41.84	51.01	59.24	50.6967	13.37	16.1	9.32	12.93	52.31	56.2	48.73	52.4133	Abscisic acid receptor PYL1 OS=Arabidopsis thaliana GN=PYL1 PE=1 SV=1	GO:0080163//regulation of protein serine/threonine phosphatase activity;GO:0006569//tryptophan catabolic process;GO:0019761//glucosinolate biosynthetic process;GO:0009684//indoleacetic acid biosynthetic process;GO:0009738//abscisic acid mediated signaling pathway	GO:0004872//receptor activity;GO:0042803//protein homodimerization activity;GO:0010427//abscisic acid binding	GO:0005634//nucleus
Unigene41167_DB	1	49.78	54.87	46.69	50.4467	20.81	25.37	33.83	26.67	62.18	47.5	64.46	58.0467	Ankyrin repeat-containing protein At3g12360 OS=Arabidopsis thaliana GN=At3g12360 PE=2 SV=1	GO:0034613//cellular protein localization;GO:0009651//response to salt stress	GO:0005515//protein binding	GO:0005634//nucleus;GO:0009536//plastid;GO:0005886//plasma membrane
CL17531.Contig2_DB	1	40.72	45.62	63.45	49.93	27.43	11.51	8.92	15.9533	43.48	38.91	84.72	55.7033	--	GO:0007623//circadian rhythm	-	GO:0016021//integral to membrane;GO:0009706//chloroplast inner membrane
CL12349.Contig1_DB	1	27.9	82.84	38.98	49.9067	14.22	12.2	20.85	15.7567	60.81	77.43	62.86	67.0333	Ribulose bisphosphate carboxylase/oxygenase activase B, chloroplastic OS=Hordeum vulgare GN=RCAB PE=2 SV=1	GO:0050896//response to stimulus	GO:0005524//ATP binding	GO:0009570//chloroplast stroma
CL14643.Contig1_DB	1	37.96	65.16	46.07	49.73	12.51	14.46	23.53	16.8333	23.02	68.71	32.63	41.4533	Non-specific lipid-transfer protein 2 OS=Oryza sativa subsp. indica GN=LTP-2 PE=2 SV=2	-	-	GO:0016023//cytoplasmic membrane-bounded vesicle
CL2381.Contig1_DB	1	43.43	57	48.01	49.48	12.91	13.92	19.1	15.31	47	50.29	55.24	50.8433	Uncharacterized protein At4g06598 OS=Arabidopsis thaliana GN=At4g06598 PE=2 SV=2	GO:0006355//regulation of transcription, DNA-dependent	GO:0003700//sequence-specific DNA binding transcription factor activity;GO:0043565//sequence-specific DNA binding	GO:0005739//mitochondrion
Unigene41809_DB	1	37.91	68.45	41.99	49.45	13.08	18.82	16.17	16.0233	44.71	49.31	76.04	56.6867	E3 ubiquitin-protein ligase XB3 OS=Oryza sativa subsp. japonica GN=XB3 PE=1 SV=1	GO:0042742//defense response to bacterium;GO:0051865//protein autoubiquitination	GO:0016301//kinase activity;GO:0005515//protein binding;GO:0004842//ubiquitin-protein ligase activity;GO:0008270//zinc ion binding	-
CL6163.Contig2_DB	1	48.22	52.35	47.52	49.3633	29.19	16.33	33.55	26.3567	61.86	87.99	64.48	71.4433	Hexose carrier protein HEX6 OS=Ricinus communis GN=HEX6 PE=2 SV=1	GO:0055085//transmembrane transport;GO:0008643//carbohydrate transport;GO:0055114//oxidation-reduction process	GO:0005351//sugar:hydrogen symporter activity;GO:0032440//2-alkenal reductase [NAD(P)] activity	GO:0016021//integral to membrane
CL12994.Contig1_DB	1	47.19	38.46	56.31	47.32	31.6	21.46	20.89	24.65	67.93	60.8	49.63	59.4533	Glutathione S-transferase F11 OS=Arabidopsis thaliana GN=GSTF11 PE=2 SV=1	-	GO:0004364//glutathione transferase activity	-
CL3338.Contig1_DB	1	33.45	63.68	44.28	47.1367	17.01	19.67	17.49	18.0567	34.84	30.5	56.68	40.6733	GDSL esterase/lipase At5g03610 OS=Arabidopsis thaliana GN=At5g03610 PE=2 SV=1	-	GO:0016788//hydrolase activity, acting on ester bonds	GO:0016023//cytoplasmic membrane-bounded vesicle
CL2425.Contig2_DB	1	43.78	45.76	49.39	46.31	14.58	8.49	17.04	13.37	51.82	38.48	67.97	52.7567	Arginine/serine-rich protein 45 OS=Arabidopsis thaliana GN=SR45 PE=1 SV=1	-	GO:0003677//DNA binding	GO:0009536//plastid
CL5718.Contig3_DB	1	39.5	68.93	28.45	45.6267	8.19	13.39	15.69	12.4233	31.71	53.59	56.1	47.1333	Non-functional NADPH-dependent codeinone reductase 2 OS=Papaver somniferum GN=COR2 PE=1 SV=1	GO:0009651//response to salt stress;GO:0055114//oxidation-reduction process	GO:0016491//oxidoreductase activity	GO:0005739//mitochondrion
CL19746.Contig1_DB	1	42.38	40.81	52.85	45.3467	15.66	17.28	24.92	19.2867	51.35	55.85	38.98	48.7267	Metalloendoproteinase 1 OS=Glycine max PE=1 SV=2	-	GO:0008233//peptidase activity	GO:0016023//cytoplasmic membrane-bounded vesicle
CL20487.Contig2_DB	1	62.28	31.13	41.71	45.04	6.09	17.23	13.4	12.24	47.28	42.98	20.21	36.8233	Serine/arginine-rich splicing factor RS2Z33 OS=Arabidopsis thaliana GN=RS2Z33 PE=1 SV=1	-	GO:0046872//metal ion binding;GO:0097159//organic cyclic compound binding;GO:1901363	GO:0005739//mitochondrion
Unigene38857_DB	1	38.95	51.56	43.54	44.6833	17.91	14.79	15.99	16.23	37.69	39.3	42.97	39.9867	Arginine/serine-rich protein 45 OS=Arabidopsis thaliana GN=SR45 PE=1 SV=1	-	-	-
CL17957.Contig1_DB	1	26.76	55.73	51.5	44.6633	20.84	26.38	23.63	23.6167	37.85	46.94	70.37	51.72	1,4-Dihydroxy-2-naphthoyl-CoA synthase, peroxisomal OS=Arabidopsis thaliana GN=MENB PE=1 SV=2	GO:0009234//menaquinone biosynthetic process;GO:0042371//vitamin K biosynthetic process	GO:0008935//1,4-dihydroxy-2-naphthoyl-CoA synthase activity	GO:0005777//peroxisome;GO:0005739//mitochondrion
CL19767.Contig4_DB	1	46.82	46.81	40.15	44.5933	17.43	19.28	12.03	16.2467	29.44	41.75	41.96	37.7167	GDSL esterase/lipase At1g28600 OS=Arabidopsis thaliana GN=At1g28600 PE=2 SV=1	-	GO:0016787//hydrolase activity	GO:0016023//cytoplasmic membrane-bounded vesicle
CL16927.Contig2_DB	1	13.72	64.52	55.53	44.59	16.93	23.63	12.67	17.7433	29.25	34.64	97.58	53.8233	Uncharacterized protein At1g28695 OS=Arabidopsis thaliana GN=At1g28695 PE=2 SV=1	-	-	GO:0016023//cytoplasmic membrane-bounded vesicle
Unigene140_DB	1	61.6	33.37	38.22	44.3967	21.63	9.37	12.46	14.4867	38.62	35.69	66.94	47.0833	--	-	-	-
CL16186.Contig3_DB	1	42.86	49.51	37.87	43.4133	15.84	19.96	21	18.9333	28.9	52.2	44.51	41.87	Thioredoxin H2 OS=Arabidopsis thaliana GN=TRX2 PE=2 SV=2	GO:0000280//nuclear division;GO:0000103//sulfate assimilation;GO:0007000//nucleolus organization	GO:0016671//oxidoreductase activity, acting on a sulfur group of donors, disulfide as acceptor	GO:0005886//plasma membrane;GO:0005829//cytosol;GO:0005739//mitochondrion
CL19321.Contig2_DB	1	31.35	61.44	36.13	42.9733	12.76	16.51	10.41	13.2267	40.91	36.35	34.47	37.2433	Vegetative cell wall protein gp1 OS=Chlamydomonas reinhardtii GN=GP1 PE=2 SV=1	GO:0006629//lipid metabolic process	GO:0004806//triglyceride lipase activity	-
Unigene39343_DB	1	42.77	40.79	44.77	42.7767	15.69	6.06	11.59	11.1133	63.47	66.82	70.04	66.7767	Formin-like protein 8 OS=Oryza sativa subsp. japonica GN=FH8 PE=2 SV=1	-	GO:0016757//transferase activity, transferring glycosyl groups	GO:0009536//plastid
CL28995.Contig4_DB	1	52.74	31.55	43.68	42.6567	8.66	7.7	22.76	13.04	43.53	56.55	45.84	48.64	3-ketoacyl-CoA synthase 10 OS=Arabidopsis thaliana GN=FDH PE=1 SV=2	GO:0006633//fatty acid biosynthetic process;GO:0009409//response to cold;GO:0000038//very long-chain fatty acid metabolic process;GO:0042335//cuticle development;GO:0009416//response to light stimulus;GO:0080167//response to karrikin;GO:0009913//epidermal cell differentiation	GO:0016747//transferase activity, transferring acyl groups other than amino-acyl groups	GO:0016020//membrane;GO:0005783//endoplasmic reticulum
CL24486.Contig2_DB	1	38.54	32.93	56.32	42.5967	18.44	17.66	11.47	15.8567	37.39	34.55	60.63	44.19	Protein FD OS=Arabidopsis thaliana GN=FD PE=1 SV=1	-	GO:0003677//DNA binding	-
Unigene33294_DB	1	42.73	52.71	30.85	42.0967	18.18	7.84	16.78	14.2667	70.02	84.13	48.67	67.6067	Transcription factor DIVARICATA OS=Antirrhinum majus GN=DIVARICATA PE=2 SV=1	-	GO:0003677//DNA binding;GO:0003682//chromatin binding	-
CL25911.Contig1_DB	1	26.2	42.64	54.6	41.1467	7.51	3.69	7.51	6.23667	39.67	42.58	41.88	41.3767	Vegetative cell wall protein gp1 OS=Chlamydomonas reinhardtii GN=GP1 PE=2 SV=1	-	-	-
CL14425.Contig1_DB	1	61.02	36.77	25.05	40.9467	12.01	12.1	22.54	15.55	72.03	44.84	71.79	62.8867	Protein ycf2 OS=Oenothera parviflora GN=ycf2-A PE=3 SV=1	-	-	-
CL1236.Contig1_DB	1	54.37	23.92	44.01	40.7667	16.01	18	17.07	17.0267	59.4	69.31	56.48	61.73	Splicing factor U2af small subunit A OS=Oryza sativa subsp. japonica GN=U2AF35A PE=2 SV=1	GO:0010162//seed dormancy process;GO:0009845//seed germination;GO:0009933//meristem structural organization;GO:0048573//photoperiodism, flowering;GO:0009909//regulation of flower development;GO:0009640//photomorphogenesis;GO:0008380//RNA splicing;GO:0016567//protein ubiquitination;GO:0019915//lipid storage;GO:0050826//response to freezing;GO:0006397//mRNA processing;GO:0010182//sugar mediated sig…	GO:0003723//RNA binding;GO:0008270//zinc ion binding;GO:0003677//DNA binding;GO:0000166//nucleotide binding	GO:0005634//nucleus
CL2642.Contig6_DB	1	29.8	59.63	32.46	40.63	24.67	21.88	18.92	21.8233	43.92	37.99	62.66	48.19	--	-	-	GO:0009507//chloroplast
CL23297.Contig1_DB	1	47.7	32.01	40.93	40.2133	8.7	6.32	9.66	8.22667	59.52	56.01	48.05	54.5267	Arginine/serine-rich protein 45 OS=Arabidopsis thaliana GN=SR45 PE=1 SV=1	-	GO:0016757//transferase activity, transferring glycosyl groups	-
CL4125.Contig1_DB	1	35.08	44.97	40.5	40.1833	17.96	17.04	20.33	18.4433	44.01	30.93	47.53	40.8233	Sulfated surface glycoprotein 185 OS=Volvox carteri PE=1 SV=1	-	GO:0008270//zinc ion binding	GO:0005886//plasma membrane
CL28438.Contig1_DB	1	30.25	50.65	37.54	39.48	17.94	12.16	10.18	13.4267	36.38	47.88	50.01	44.7567	Uncharacterized N-acetyltransferase ycf52 OS=Porphyra purpurea GN=ycf52 PE=3 SV=1	GO:0019684//photosynthesis, light reaction	GO:0008080//N-acetyltransferase activity	GO:0009507//chloroplast
CL14222.Contig2_DB	1	32.13	51.68	32.91	38.9067	13.48	8.78	10.42	10.8933	50.49	33.97	28.02	37.4933	Nitrate transporter 1.1 OS=Arabidopsis thaliana GN=NRT1.1 PE=1 SV=1	GO:0009414//response to water deprivation;GO:0006857//oligopeptide transport;GO:0015706//nitrate transport;GO:0010167//response to nitrate	GO:0015112//nitrate transmembrane transporter activity	GO:0005886//plasma membrane;GO:0016021//integral to membrane
CL8366.Contig3_DB	1	80.84	17.61	18.04	38.83	14.65	13.63	23.15	17.1433	32.09	109.82	31.68	57.8633	Probable aquaporin TIP2-2 OS=Oryza sativa subsp. japonica GN=TIP2-2 PE=2 SV=1	GO:0071918//urea transmembrane transport;GO:0072489//methylammonium transmembrane transport;GO:0006833//water transport	GO:0015204//urea transmembrane transporter activity;GO:0051739//ammonia transmembrane transporter activity;GO:0015200//methylammonium transmembrane transporter activity	GO:0016021//integral to membrane;GO:0009941//chloroplast envelope;GO:0009705//plant-type vacuole membrane;GO:0009505//plant-type cell wall;GO:0000326//protein storage vacuole;GO:0042807//central vacuole;GO:0005886//plasma membrane
CL13760.Contig1_DB	1	64.09	19.53	32.11	38.5767	11.83	7.66	16.56	12.0167	52.81	74.3	41.01	56.04	Tropinone reductase 1 OS=Datura stramonium GN=TR1 PE=1 SV=1	GO:0055114//oxidation-reduction process	GO:0016491//oxidoreductase activity;GO:0000166//nucleotide binding	GO:0016023//cytoplasmic membrane-bounded vesicle
CL22323.Contig1_DB	1	28.33	50.34	36.89	38.52	20.53	20.7	29.63	23.62	38.45	57.03	56.48	50.6533	Probable carboxylesterase 18 OS=Arabidopsis thaliana GN=CXE18 PE=2 SV=1	GO:0008152//metabolic process;GO:0009860//pollen tube growth	GO:0004091//carboxylesterase activity	GO:0009536//plastid
Unigene32217_DB	1	52.41	33.05	29.44	38.3	16.63	21.08	23.15	20.2867	76.05	29.24	50.99	52.0933	Ribosome-inactivating protein OS=Zea mays PE=1 SV=1	-	-	-
CL12544.Contig1_DB	1	28.75	50.87	31.5	37.04	17.45	11.19	23.06	17.2333	34.74	28.03	57.84	40.2033	--	-	-	-
CL3791.Contig1_DB	1	37.39	46.21	25.54	36.38	5.98	8.55	15.6	10.0433	39.11	39.5	38.66	39.09	Disease resistance protein RGA2 OS=Solanum bulbocastanum GN=RGA2 PE=1 SV=1	-	-	-
Unigene32244_DB	1	30.75	38.94	35.97	35.22	7.34	6.08	9.86	7.76	30.85	34.01	23.69	29.5167	--	GO:0009725//response to hormone stimulus;GO:1901700	GO:0005488//binding	-
CL740.Contig1_DB	1	31.17	39.02	32.91	34.3667	15.74	15.77	19.02	16.8433	53.18	39.04	62.15	51.4567	Bifunctional nuclease OS=Oryza minuta GN=BBD PE=2 SV=1	GO:0090305//nucleic acid phosphodiester bond hydrolysis;GO:0050832//defense response to fungus	GO:0004518//nuclease activity	GO:0005634//nucleus
CL15664.Contig1_DB	1	37.83	31.19	32.82	33.9467	9.87	10.56	12.34	10.9233	41.7	26.81	32.61	33.7067	Early nodulin-20 OS=Medicago truncatula GN=ENOD20 PE=3 SV=1	-	-	GO:0005739//mitochondrion
CL18082.Contig1_DB	1	25.38	39.45	34.55	33.1267	23.55	15.81	21.57	20.31	38.66	41.5	53.66	44.6067	Glucose-1-phosphate adenylyltransferase large subunit 1, chloroplastic OS=Arabidopsis thaliana GN=ADG2 PE=1 SV=3	GO:0009902//chloroplast relocation;GO:0019684//photosynthesis, light reaction;GO:0010114//response to red light;GO:0006098//pentose-phosphate shunt;GO:0006364//rRNA processing;GO:0010027//thylakoid membrane organization;GO:0009637//response to blue light;GO:0019252//starch biosynthetic process;GO:0010218//response to far red light;GO:0005978//glycogen biosynthetic process	GO:0008878//glucose-1-phosphate adenylyltransferase activity	GO:0009941//chloroplast envelope;GO:0009570//chloroplast stroma
Unigene38540_DB	1	41.91	21.91	35.14	32.9867	15.47	14.57	10.25	13.43	51.4	42.88	52.54	48.94	Aquaporin NIP3-1 OS=Oryza sativa subsp. japonica GN=NIP3-1 PE=2 SV=2	GO:0015700//arsenite transport;GO:0015706//nitrate transport;GO:0035445//borate transmembrane transport;GO:0010106//cellular response to iron ion starvation;GO:0071918//urea transmembrane transport;GO:0006826//iron ion transport;GO:0010167//response to nitrate;GO:0015793//glycerol transport;GO:0046685//response to arsenic-containing substance;GO:0080029//cellular response to boron-containing subs…	GO:0015204//urea transmembrane transporter activity;GO:0015168//glycerol transmembrane transporter activity;GO:0015105//arsenite transmembrane transporter activity;GO:0015250//water channel activity;GO:0080138//borate uptake transmembrane transporter activity	GO:0016328//lateral plasma membrane;GO:0016021//integral to membrane
CL28842.Contig1_DB	1	28.5	33.09	36.8	32.7967	14.53	14.55	10.86	13.3133	35.25	27.71	58.67	40.5433	--	-	-	GO:0005739//mitochondrion
CL16027.Contig2_DB	1	29.41	32.25	36.01	32.5567	25.31	19.49	10.41	18.4033	46.53	41.37	53.21	47.0367	--	GO:0016226//iron-sulfur cluster assembly;GO:0010275//NAD(P)H dehydrogenase complex assembly;GO:0009073//aromatic amino acid family biosynthetic process	-	GO:0005739//mitochondrion;GO:0009535//chloroplast thylakoid membrane;GO:0009570//chloroplast stroma;GO:0005634//nucleus
CL19412.Contig1_DB	1	33.01	38.96	25.63	32.5333	6.86	14	11.74	10.8667	42.71	55.27	30.25	42.7433	Cytokinin dehydrogenase 11 OS=Oryza sativa subsp. japonica GN=CKX11 PE=2 SV=1	GO:0009823//cytokinin catabolic process;GO:0055114//oxidation-reduction process	GO:0050660//flavin adenine dinucleotide binding;GO:0008762//UDP-N-acetylmuramate dehydrogenase activity;GO:0019139//cytokinin dehydrogenase activity	GO:0005576//extracellular region
CL13332.Contig2_DB	1	43.54	34.97	18.56	32.3567	15.88	10.46	14.51	13.6167	19.4	46.63	37.71	34.58	UDP-glycosyltransferase 72B1 OS=Arabidopsis thaliana GN=UGT72B1 PE=1 SV=1	GO:0042221//response to chemical stimulus;GO:0008152//metabolic process	GO:0016758//transferase activity, transferring hexosyl groups	GO:0005739//mitochondrion
CL16795.Contig1_DB	1	46.42	23.62	25.94	31.9933	10.12	19.79	23.25	17.72	40.29	54.33	27.36	40.66	--	GO:0006979//response to oxidative stress	-	-
Unigene33877_DB	1	33.76	31.42	30.63	31.9367	7.4	12.07	14.64	11.37	56.24	24.85	45.9	42.33	Cyclic nucleotide-gated ion channel 2 OS=Arabidopsis thaliana GN=CNGC2 PE=1 SV=1	GO:0070588//calcium ion transmembrane transport;GO:0009626//plant-type hypersensitive response;GO:0007263//nitric oxide mediated signal transduction	GO:0005262//calcium channel activity;GO:0005222//intracellular cAMP activated cation channel activity;GO:0005242//inward rectifier potassium channel activity	GO:0005739//mitochondrion;GO:0016020//membrane
CL27126.Contig2_DB	1	34.03	37.07	24.68	31.9267	6.56	10.64	9.72	8.97333	31.25	37.24	71.5	46.6633	Cytochrome P450 71A1 OS=Persea americana GN=CYP71A1 PE=1 SV=2	-	GO:0046872//metal ion binding;GO:0016491//oxidoreductase activity	GO:0016023//cytoplasmic membrane-bounded vesicle
CL16687.Contig3_DB	1	29.9	39.58	26.21	31.8967	13.55	13.51	24.8	17.2867	36.07	41.27	56.84	44.7267	Transcription factor HB29 OS=Arabidopsis thaliana GN=HB29 PE=1 SV=1	-	-	-
CL8020.Contig1_DB	1	41.01	19.31	34.67	31.6633	7.82	7.71	12.11	9.21333	26.56	38.93	38.28	34.59	Peroxidase 15 OS=Ipomoea batatas GN=pod PE=1 SV=1	GO:0006952//defense response;GO:0051707//response to other organism;GO:0009628//response to abiotic stimulus;GO:0040007//growth	GO:0005488//binding;GO:0016491//oxidoreductase activity	GO:0005618//cell wall;GO:0016023//cytoplasmic membrane-bounded vesicle;GO:0016020//membrane
CL308.Contig1_DB	1	35.5	26.18	32.81	31.4967	9.77	8.72	16.35	11.6133	29.01	47.15	31.09	35.75	Formin-like protein 3 OS=Oryza sativa subsp. japonica GN=FH3 PE=2 SV=2	-	-	-
Unigene18572_DB	1	38.63	36.41	15.63	30.2233	13.64	12.13	25.5	17.09	35.54	41.12	32.45	36.37	Pistil-specific extensin-like protein OS=Nicotiana tabacum PE=2 SV=1	-	-	-
CL3034.Contig7_DB	1	15.51	47.04	27.26	29.9367	2.91	8.69	3.23	4.94333	22.41	23.86	31.24	25.8367	--	GO:0009926//auxin polar transport;GO:0055085//transmembrane transport	GO:0009672//auxin:hydrogen symporter activity	GO:0016023//cytoplasmic membrane-bounded vesicle;GO:0016021//integral to membrane
CL11884.Contig2_DB	1	13.93	35.2	40.45	29.86	18.11	15.91	19.22	17.7467	28.8	36.24	51.23	38.7567	--	GO:0010729//positive regulation of hydrogen peroxide biosynthetic process;GO:0002229//defense response to oomycetes;GO:0010103//stomatal complex morphogenesis;GO:0019684//photosynthesis, light reaction	-	GO:0009507//chloroplast;GO:0016020//membrane;GO:0005739//mitochondrion
CL19692.Contig1_DB	1	33.72	21.71	33.91	29.78	7.88	13.11	19.88	13.6233	41.24	41.86	42.92	42.0067	Uncharacterized GPI-anchored protein At1g27950 OS=Arabidopsis thaliana GN=At1g27950 PE=1 SV=1	GO:0006869//lipid transport	-	GO:0046658//anchored to plasma membrane;GO:0016023//cytoplasmic membrane-bounded vesicle
Unigene793_DB	1	38.57	31.19	18.96	29.5733	14.6	13.82	13.57	13.9967	36.31	22.63	38.36	32.4333	Monodehydroascorbate reductase, chloroplastic OS=Arabidopsis thaliana GN=At1g63940 PE=2 SV=3	GO:0042744//hydrogen peroxide catabolic process;GO:0055114//oxidation-reduction process;GO:0009409//response to cold;GO:0046686//response to cadmium ion	GO:0016656//monodehydroascorbate reductase (NADH) activity;GO:0005524//ATP binding;GO:0050660//flavin adenine dinucleotide binding	GO:0005829//cytosol;GO:0005739//mitochondrion;GO:0009570//chloroplast stroma;GO:0010319//stromule
CL1039.Contig1_DB	1	26.43	21.2	39.26	28.9633	11.39	5.85	14.9	10.7133	17.13	33.54	28.12	26.2633	Auxin response factor 17 OS=Oryza sativa subsp. japonica GN=ARF17 PE=2 SV=1	GO:0006355//regulation of transcription, DNA-dependent;GO:0009908//flower development;GO:0009734//auxin mediated signaling pathway	GO:0003677//DNA binding;GO:0046983//protein dimerization activity	GO:0005634//nucleus
CL14410.Contig3_DB	1	21.89	30.14	34.72	28.9167	13.7	11.65	13.55	12.9667	38	23.84	33.48	31.7733	Cationic amino acid transporter 5 OS=Arabidopsis thaliana GN=CAT5 PE=1 SV=1	GO:0043091//L-arginine import;GO:0003333//amino acid transmembrane transport;GO:0015819//lysine transport;GO:0051938//L-glutamate import	GO:0015326//cationic amino acid transmembrane transporter activity;GO:0015189//L-lysine transmembrane transporter activity;GO:0015181//arginine transmembrane transporter activity;GO:0005313//L-glutamate transmembrane transporter activity	GO:0005886//plasma membrane;GO:0016021//integral to membrane
CL3320.Contig2_DB	1	28.41	30.41	27.81	28.8767	10.1	8.21	15.57	11.2933	24.02	22.07	26.58	24.2233	--	-	GO:0008270//zinc ion binding	-
CL12076.Contig2_DB	1	18.65	40.85	26.94	28.8133	15.97	7.73	7.09	10.2633	22.01	40.32	47.77	36.7	S-norcoclaurine synthase OS=Thalictrum flavum subsp. glaucum PE=1 SV=1	GO:0009607//response to biotic stimulus;GO:0006952//defense response	-	-
CL28995.Contig3_DB	1	40.73	4.97	40.45	28.7167	7.26	10.94	13.1	10.4333	58.43	35.44	25.56	39.81	3-ketoacyl-CoA synthase 10 OS=Arabidopsis thaliana GN=FDH PE=1 SV=2	GO:0006633//fatty acid biosynthetic process;GO:0009409//response to cold;GO:0000038//very long-chain fatty acid metabolic process;GO:0042335//cuticle development;GO:0009416//response to light stimulus;GO:0080167//response to karrikin;GO:0009913//epidermal cell differentiation	GO:0016747//transferase activity, transferring acyl groups other than amino-acyl groups	GO:0016020//membrane;GO:0005783//endoplasmic reticulum
CL12612.Contig1_DB	1	30.36	23.25	32.21	28.6067	8.62	12.49	15.46	12.19	36.74	38.18	32.91	35.9433	Formin-like protein 5 OS=Oryza sativa subsp. japonica GN=FH5 PE=2 SV=2	GO:0006468//protein phosphorylation	GO:0016747//transferase activity, transferring acyl groups other than amino-acyl groups;GO:0005524//ATP binding;GO:0004674//protein serine/threonine kinase activity	-
CL13334.Contig2_DB	1	24.68	31.57	28.64	28.2967	10.58	9.63	13.41	11.2067	46.91	39.12	45.61	43.88	--	-	GO:0016787//hydrolase activity	GO:0005739//mitochondrion;GO:0009536//plastid
Unigene37881_DB	1	25.65	25.24	32.05	27.6467	12.08	22.46	12.26	15.6	35.8	35.15	45.91	38.9533	--	-	-	GO:0009536//plastid
CL17354.Contig1_DB	1	20.46	28.5	33.88	27.6133	8.51	3.59	10.31	7.47	56.6	41.05	29.78	42.4767	--	-	-	-
CL13135.Contig5_DB	1	29.11	39.89	13.69	27.5633	7.88	15.17	6.97	10.0067	36.61	33.1	21.65	30.4533	Uncharacterized protein ycf36 OS=Cyanophora paradoxa GN=ycf36 PE=3 SV=1	GO:0015996//chlorophyll catabolic process	-	GO:0009507//chloroplast;GO:0016020//membrane
CL18803.Contig1_DB	1	21.52	30.48	30.33	27.4433	4.37	4.23	8.1	5.56667	25.83	19.65	20.88	22.12	Pentatricopeptide repeat-containing protein At3g57430, chloroplastic OS=Arabidopsis thaliana GN=PCMP-H81 PE=2 SV=2	GO:0031425//chloroplast RNA processing	-	GO:0009507//chloroplast
CL13411.Contig1_DB	1	26.72	35.36	19.83	27.3033	14.33	9.87	10.77	11.6567	43.9	50.03	27.62	40.5167	Vegetative cell wall protein gp1 OS=Chlamydomonas reinhardtii GN=GP1 PE=2 SV=1	-	-	-
CL26715.Contig1_DB	1	31.57	35.21	13.93	26.9033	9.82	7.81	19.58	12.4033	31.85	40.49	36.55	36.2967	Formin-like protein 5 OS=Oryza sativa subsp. japonica GN=FH5 PE=2 SV=2	GO:0042594//response to starvation;GO:0044699;GO:0006914//autophagy	GO:1901981//phosphatidylinositol phosphate binding	GO:0009536//plastid
CL13942.Contig1_DB	1	26.44	23.52	30.47	26.81	14.04	11.22	19.34	14.8667	36	39.88	23.66	33.18	Equilibrative nucleotide transporter 1 OS=Arabidopsis thaliana GN=ENT1 PE=1 SV=1	GO:0006810//transport	GO:0010174//nucleoside transmembrane transporter activity, against a concentration gradient	GO:0016023//cytoplasmic membrane-bounded vesicle;GO:0005886//plasma membrane;GO:0005774//vacuolar membrane;GO:0016021//integral to membrane;GO:0005739//mitochondrion
CL9320.Contig1_DB	1	24.03	16.26	39.88	26.7233	3.5	1.23	10.98	5.23667	13.9	49.84	11.41	25.05	--	-	-	-
CL15793.Contig1_DB	1	24.51	26.07	29.51	26.6967	6.37	8.43	10.9	8.56667	24.36	33.26	21.31	26.31	--	-	-	GO:0016023//cytoplasmic membrane-bounded vesicle;GO:0016020//membrane
Unigene31127_DB	1	21.68	25.59	31.99	26.42	8.48	6.51	4.97	6.65333	24.99	33.77	37.73	32.1633	Glutaredoxin-C1 OS=Oryza sativa subsp. japonica GN=GRXC1 PE=3 SV=1	GO:0045454//cell redox homeostasis;GO:0022900//electron transport chain	GO:0009055//electron carrier activity;GO:0015035//protein disulfide oxidoreductase activity	GO:0016023//cytoplasmic membrane-bounded vesicle;GO:0005634//nucleus
Unigene37467_DB	1	22.45	35.46	20.83	26.2467	7.74	10.39	19.62	12.5833	32.92	28.6	26.8	29.44	Vegetative cell wall protein gp1 OS=Chlamydomonas reinhardtii GN=GP1 PE=2 SV=1	GO:0055114//oxidation-reduction process	GO:0016491//oxidoreductase activity	-
CL22667.Contig3_DB	1	27.9	19.4	30.95	26.0833	9.09	6.06	15.16	10.1033	27.2	34.79	30.87	30.9533	Glutaredoxin-C15 OS=Oryza sativa subsp. japonica GN=GRXC15 PE=3 SV=1	GO:0045454//cell redox homeostasis;GO:0022900//electron transport chain	GO:0009055//electron carrier activity;GO:0015035//protein disulfide oxidoreductase activity	GO:0016023//cytoplasmic membrane-bounded vesicle;GO:0005634//nucleus
CL22998.Contig3_DB	1	34.68	27.89	14.82	25.7967	3.38	2.43	3.7	3.17	24.13	28.01	20.15	24.0967	Proline-rich receptor-like protein kinase PERK10 OS=Arabidopsis thaliana GN=PERK10 PE=1 SV=2	-	-	GO:0009536//plastid
CL22394.Contig1_DB	1	24.69	32.44	19.74	25.6233	11.78	6.83	11.83	10.1467	25.05	17.98	27.84	23.6233	CASP-like protein Os02g0134500 OS=Oryza sativa subsp. japonica GN=Os02g0134500 PE=2 SV=2	-	-	-
CL5280.Contig2_DB	1	24.27	23.57	28.7	25.5133	5.04	4.22	6.47	5.24333	17.37	22.58	20.76	20.2367	Uclacyanin-2 OS=Arabidopsis thaliana GN=At2g44790 PE=1 SV=1	-	GO:0005507//copper ion binding;GO:0009055//electron carrier activity	GO:0016023//cytoplasmic membrane-bounded vesicle
CL15472.Contig1_DB	1	23.61	21.83	30.43	25.29	16.04	12.99	14.76	14.5967	25.39	44.67	36.45	35.5033	NO-associated protein 1, chloroplastic/mitochondrial OS=Arabidopsis thaliana GN=NOA1 PE=1 SV=1	GO:0051246//regulation of protein metabolic process;GO:0006184//GTP catabolic process;GO:0006809//nitric oxide biosynthetic process;GO:0010322//regulation of isopentenyl diphosphate biosynthetic process, mevalonate-independent pathway;GO:0048366//leaf development;GO:0055114//oxidation-reduction process;GO:0010193//response to ozone;GO:0042254//ribosome biogenesis;GO:0010027//thylakoid membrane or…	GO:0004517//nitric-oxide synthase activity;GO:0005525//GTP binding;GO:0003924//GTPase activity	GO:0009507//chloroplast;GO:0005739//mitochondrion
CL20568.Contig1_DB	1	24.62	29.11	21.86	25.1967	13.86	7.85	12.16	11.29	27.61	23.23	23.7	24.8467	Probable inositol transporter 2 OS=Arabidopsis thaliana GN=INT2 PE=1 SV=1	GO:0015798//myo-inositol transport;GO:0006863//purine nucleobase transport;GO:0055085//transmembrane transport;GO:0023052//signaling	GO:0005351//sugar:hydrogen symporter activity;GO:0005366//myo-inositol:hydrogen symporter activity	GO:0005886//plasma membrane;GO:0090406//pollen tube;GO:0016021//integral to membrane
Unigene39075_DB	1	20.41	28.99	26.15	25.1833	12.94	17.53	13.77	14.7467	38.74	41.38	20.82	33.6467	Glutaredoxin-C10 OS=Oryza sativa subsp. japonica GN=GRXC10 PE=3 SV=1	GO:0045454//cell redox homeostasis;GO:0022900//electron transport chain	GO:0009055//electron carrier activity;GO:0015035//protein disulfide oxidoreductase activity	GO:0016023//cytoplasmic membrane-bounded vesicle;GO:0005634//nucleus
CL22212.Contig2_DB	1	27.63	6.17	41.58	25.1267	6.66	6.56	2.73	5.31667	25.52	13.73	27.04	22.0967	Cysteine-rich repeat secretory protein 55 OS=Arabidopsis thaliana GN=CRRSP55 PE=2 SV=1	GO:0080167//response to karrikin	-	GO:0016023//cytoplasmic membrane-bounded vesicle
CL20994.Contig3_DB	1	26.03	22.19	27.13	25.1167	9.34	12.28	7.98	9.86667	24.84	25.38	30.09	26.77	Sulfated surface glycoprotein 185 OS=Volvox carteri PE=1 SV=1	-	-	-
CL25678.Contig2_DB	1	25.63	23.07	25.84	24.8467	10.11	10.43	9.58	10.04	25.56	19.63	25.5	23.5633	--	-	-	-
Unigene34919_DB	1	21.9	29.02	23.47	24.7967	7.47	8.22	8.36	8.01667	28.2	21.38	25.08	24.8867	Peroxisome biogenesis protein 7 OS=Arabidopsis thaliana GN=PEX7 PE=1 SV=2	GO:0016558//protein import into peroxisome matrix;GO:0006635//fatty acid beta-oxidation;GO:0016573//histone acetylation	GO:0005053//peroxisome matrix targeting signal-2 binding;GO:0005515//protein binding;GO:0004402//histone acetyltransferase activity	GO:0080008//Cul4-RING ubiquitin ligase complex;GO:0005634//nucleus
CL764.Contig1_DB	1	23.79	22.21	28.07	24.69	9.68	5.65	15.35	10.2267	24.56	26.31	31.64	27.5033	Protein TIC110, chloroplastic OS=Pisum sativum GN=TIC110 PE=1 SV=1	-	-	-
CL24033.Contig1_DB	1	28.61	24.71	18.46	23.9267	10.53	4.47	8.2	7.73333	41.32	34.47	34.79	36.86	Copper transporter 5.1 OS=Oryza sativa subsp. japonica GN=COPT5.1 PE=2 SV=1	GO:0009737//response to abscisic acid stimulus;GO:0035434//copper ion transmembrane transport;GO:0015680//intracellular copper ion transport	GO:0015089//high affinity copper ion transmembrane transporter activity	GO:0005794//Golgi apparatus;GO:0005770//late endosome;GO:0009506//plasmodesma;GO:0005774//vacuolar membrane;GO:0016021//integral to membrane
CL22998.Contig1_DB	1	21.65	27.37	22.59	23.87	2.82	1.53	2.01	2.12	40.91	30.31	33.5	34.9067	Vegetative cell wall protein gp1 OS=Chlamydomonas reinhardtii GN=GP1 PE=2 SV=1	-	-	GO:0009536//plastid
Unigene27848_DB	1	38.97	25.52	5.95	23.48	4.7	5.48	9.24	6.47333	24.86	29.91	13.17	22.6467	2'-deoxymugineic-acid 2'-dioxygenase OS=Hordeum vulgare GN=IDS3 PE=1 SV=3	GO:0055114//oxidation-reduction process	GO:0016702//oxidoreductase activity, acting on single donors with incorporation of molecular oxygen, incorporation of two atoms of oxygen;GO:0016706//oxidoreductase activity, acting on paired donors, with incorporation or reduction of molecular oxygen, 2-oxoglutarate as one donor, and incorporation of one atom each of oxygen into both donors	-
CL2390.Contig1_DB	1	5.74	40.92	23.7	23.4533	1.87	5.38	1.48	2.91	18.91	17.7	24.33	20.3133	Protein IQ-DOMAIN 14 OS=Arabidopsis thaliana GN=IQD14 PE=1 SV=1	-	-	-
Unigene35277_DB	1	12.34	31.2	26.58	23.3733	9.16	8.44	7.9	8.5	15.21	25.72	33.44	24.79	Auxin-induced protein X15 OS=Glycine max PE=2 SV=1	GO:0009734//auxin mediated signaling pathway	GO:0005516//calmodulin binding	GO:0009536//plastid
CL15794.Contig1_DB	1	24.51	16.58	28.65	23.2467	9.85	10.53	12.64	11.0067	30.4	16.05	36.81	27.7533	Glutathione transferase GST 23 OS=Zea mays PE=2 SV=1	-	-	-
CL10485.Contig1_DB	1	29.74	21.9	18.07	23.2367	11.68	7.39	18.93	12.6667	29.09	21.15	41.05	30.43	Ferredoxin--NADP reductase, root isozyme, chloroplastic OS=Oryza sativa subsp. japonica GN=Os03g0784700 PE=1 SV=1	GO:0015979//photosynthesis;GO:0022900//electron transport chain	GO:0050660//flavin adenine dinucleotide binding;GO:0005507//copper ion binding;GO:0050661//NADP binding;GO:0004324//ferredoxin-NADP+ reductase activity	GO:0042651//thylakoid membrane;GO:0009507//chloroplast
CL9987.Contig4_DB	1	27.25	31.57	10.48	23.1	3.87	0.75	6.88	3.83333	15.25	26.66	22.87	21.5933	RING-H2 zinc finger protein RHA1a OS=Arabidopsis thaliana GN=RHA1A PE=2 SV=1	-	GO:0008270//zinc ion binding	GO:0016023//cytoplasmic membrane-bounded vesicle
CL368.Contig2_DB	1	19.06	29.32	20.2	22.86	3.21	3.42	5.8	4.14333	17.51	21.79	22.32	20.54	Proline-rich receptor-like protein kinase PERK9 OS=Arabidopsis thaliana GN=PERK9 PE=2 SV=1	GO:0050896//response to stimulus;GO:0008152//metabolic process	GO:0016787//hydrolase activity	-
CL11441.Contig1_DB	1	36.05	15.64	15.99	22.56	2.53	16.59	4.4	7.84	41.96	58.79	6.69	35.8133	--	-	-	-
CL18519.Contig1_DB	1	24.17	19.88	21.49	21.8467	7.33	8.34	9.44	8.37	26.43	14.85	32.02	24.4333	Probable sulfate transporter 3.3 OS=Arabidopsis thaliana GN=SULTR3;3 PE=2 SV=2	GO:0008272//sulfate transport;GO:0055085//transmembrane transport	GO:0008271//secondary active sulfate transmembrane transporter activity	GO:0016021//integral to membrane
Unigene31567_DB	1	22.99	26.16	16.06	21.7367	3.7	3.45	3.96	3.70333	14.09	12.64	29.53	18.7533	Polyol transporter 5 OS=Arabidopsis thaliana GN=PLT5 PE=1 SV=2	GO:0031348//negative regulation of defense response;GO:0043090//amino acid import;GO:0055085//transmembrane transport	GO:0005355//glucose transmembrane transporter activity;GO:0015148//D-xylose transmembrane transporter activity;GO:0015575//mannitol transmembrane transporter activity;GO:0005354//galactose transmembrane transporter activity;GO:0015168//glycerol transmembrane transporter activity;GO:0005351//sugar:hydrogen symporter activity;GO:0005365//myo-inositol transmembrane transporter activity;GO:0015576//s…	GO:0005886//plasma membrane;GO:0016021//integral to membrane
CL19661.Contig3_DB	1	27.36	0	37.47	21.61	8.45	8.53	8.26	8.41333	32.8	30.53	13.37	25.5667	Formin-like protein 20 OS=Arabidopsis thaliana GN=FH20 PE=2 SV=3	-	-	GO:0009536//plastid
CL19064.Contig1_DB	1	19.26	27.57	17.95	21.5933	6.85	5.21	6.88	6.31333	17.87	17.55	29.33	21.5833	UDP-glycosyltransferase 75D1 OS=Arabidopsis thaliana GN=UGT75D1 PE=2 SV=2	GO:0008152//metabolic process	GO:0016758//transferase activity, transferring hexosyl groups	-
CL9510.Contig2_DB	1	18.24	24.92	21.19	21.45	9.22	9.48	8.78	9.16	18.88	24.21	20.91	21.3333	--	GO:0008152//metabolic process	GO:0008080//N-acetyltransferase activity	GO:0009536//plastid
CL19918.Contig1_DB	1	18.22	22.96	21.78	20.9867	4.97	5.79	9.53	6.76333	19.62	19.48	17.94	19.0133	Proline-rich receptor-like protein kinase PERK2 OS=Arabidopsis thaliana GN=PERK2 PE=2 SV=3	-	-	GO:0009536//plastid
Unigene40832_DB	1	20.51	20.63	21.47	20.87	5.82	5.31	9.23	6.78667	23.73	22.56	21.16	22.4833	Scarecrow-like protein 6 OS=Arabidopsis thaliana GN=SCL6 PE=1 SV=1	GO:0006355//regulation of transcription, DNA-dependent	-	GO:0009536//plastid;GO:0005739//mitochondrion
CL9781.Contig1_DB	1	16.1	21.92	24.28	20.7667	3.19	4.36	4.64	4.06333	27.74	17.45	16.37	20.52	Probable acyl-activating enzyme 1, peroxisomal OS=Arabidopsis thaliana GN=AAE1 PE=2 SV=1	GO:0008152//metabolic process	GO:0016874//ligase activity	GO:0005777//peroxisome
CL14306.Contig1_DB	1	21.94	18.4	21.74	20.6933	5.09	4.1	7.19	5.46	16.2	19.54	14.68	16.8067	Probable phosphatidylinositol 4-kinase type 2-beta At1g26270 OS=Arabidopsis thaliana GN=At1g26270 PE=1 SV=1	GO:0016310//phosphorylation	GO:0016301//kinase activity;GO:0016773//phosphotransferase activity, alcohol group as acceptor	GO:0009536//plastid
CL18350.Contig1_DB	1	18.16	26.31	17.52	20.6633	4.65	5.05	4.69	4.79667	26.95	33.75	37.37	32.69	Protein argonaute 14 OS=Oryza sativa subsp. japonica GN=AGO14 PE=2 SV=1	-	-	-
CL18958.Contig2_DB	1	19.14	19.31	23.44	20.63	8.34	5.96	8.87	7.72333	14.69	28.05	17.69	20.1433	NAC transcription factor NAM-2 OS=Hordeum vulgare var. distichum GN=NAM-2 PE=4 SV=1	GO:0006355//regulation of transcription, DNA-dependent	GO:0003677//DNA binding	-
CL4793.Contig1_DB	1	17.64	22.6	21.6	20.6133	6.12	8.06	2.85	5.67667	24.06	23.17	15.01	20.7467	Leucine-rich repeat extensin-like protein 5 OS=Arabidopsis thaliana GN=LRX5 PE=2 SV=2	-	GO:0016757//transferase activity, transferring glycosyl groups	GO:0016020//membrane;GO:0009507//chloroplast
CL22817.Contig1_DB	1	22.66	17.29	21.68	20.5433	6.39	9.75	11.76	9.3	28.66	20.88	18.61	22.7167	Probable E3 ubiquitin-protein ligase XBOS36 OS=Oryza sativa subsp. japonica GN=XBOS36 PE=2 SV=1	GO:0016567//protein ubiquitination	GO:0046872//metal ion binding;GO:0004842//ubiquitin-protein ligase activity	-
CL9618.Contig7_DB	1	21.19	35.16	5.25	20.5333	2.24	1.57	4.29	2.7	14.5	13.82	20.91	16.41	Proline iminopeptidase OS=Arabidopsis thaliana GN=PIP PE=2 SV=3	GO:0006725//cellular aromatic compound metabolic process	GO:0016787//hydrolase activity	-
CL4832.Contig3_DB	1	22.77	19.67	18.87	20.4367	4.88	2.9	4.81	4.19667	23.96	23.27	27.97	25.0667	Amino acid permease 6 OS=Arabidopsis thaliana GN=AAP6 PE=1 SV=1	-	-	GO:0016021//integral to membrane
Unigene40184_DB	1	23.57	20.76	16.59	20.3067	6.54	5.31	8.93	6.92667	24.4	25.61	35.4	28.47	Probable purine permease 11 OS=Arabidopsis thaliana GN=PUP11 PE=1 SV=1	-	-	GO:0016021//integral to membrane
CL21805.Contig1_DB	1	17.54	28.86	14.5	20.3	6.37	4.72	6.63	5.90667	12.75	19.53	18.25	16.8433	DIBOA-glucoside dioxygenase BX6 OS=Zea mays GN=BX6 PE=1 SV=1	GO:0019761//glucosinolate biosynthetic process;GO:0055114//oxidation-reduction process	GO:0046872//metal ion binding;GO:0016706//oxidoreductase activity, acting on paired donors, with incorporation or reduction of molecular oxygen, 2-oxoglutarate as one donor, and incorporation of one atom each of oxygen into both donors	-
CL8661.Contig1_DB	1	19.38	28.01	13.31	20.2333	2.21	2.54	7.44	4.06333	27.3	27.54	30.72	28.52	Vegetative cell wall protein gp1 OS=Chlamydomonas reinhardtii GN=GP1 PE=2 SV=1	-	-	-
CL7063.Contig2_DB	1	21.14	20.81	18.56	20.17	10.82	5.86	13.03	9.90333	25.89	20.66	29.54	25.3633	UNC93-like protein 2 OS=Arabidopsis thaliana GN=At1g18010 PE=2 SV=2	GO:0055085//transmembrane transport	-	GO:0016021//integral to membrane
CL28580.Contig2_DB	1	21.91	24.99	12.32	19.74	6.19	6.58	7.54	6.77	16.84	17.54	18.32	17.5667	Formin-like protein 3 OS=Oryza sativa subsp. japonica GN=FH3 PE=2 SV=2	-	-	-
CL4619.Contig1_DB	1	22.72	16.56	19.76	19.68	4.76	3.55	2.68	3.66333	18.93	14.86	16.07	16.62	Probable LRR receptor-like serine/threonine-protein kinase At2g24230 OS=Arabidopsis thaliana GN=At2g24230 PE=2 SV=1	GO:0016310//phosphorylation	GO:0016301//kinase activity;GO:0000166//nucleotide binding	GO:0016023//cytoplasmic membrane-bounded vesicle
CL10720.Contig1_DB	1	20.79	24.4	13.75	19.6467	1.98	1.46	2	1.81333	12.44	24.6	7.73	14.9233	--	-	-	-
CL20617.Contig1_DB	1	18.3	20.52	20.1	19.64	6.39	9.24	10.27	8.63333	21.55	20.25	17.4	19.7333	AT-rich interactive domain-containing protein 2 OS=Arabidopsis thaliana GN=ARID2 PE=2 SV=1	-	-	-
CL8359.Contig1_DB	1	20.31	21.94	16.29	19.5133	6.98	8.82	10.48	8.76	16.04	23.14	16.63	18.6033	36.4 kDa proline-rich protein OS=Solanum lycopersicum GN=TPRP-F1 PE=2 SV=1	-	-	-
CL19545.Contig1_DB	1	20.98	14.16	23.29	19.4767	2.27	2.62	6.62	3.83667	18.67	17.56	14.8	17.01	--	-	GO:0003682//chromatin binding	GO:0009536//plastid
CL15586.Contig1_DB	1	20.54	17.43	20.27	19.4133	1.03	2.43	4.48	2.64667	31.57	39.71	33.88	35.0533	Peroxidase 34 OS=Arabidopsis thaliana GN=PER34 PE=1 SV=1	GO:0006952//defense response;GO:0051707//response to other organism;GO:0009628//response to abiotic stimulus;GO:0040007//growth	GO:0005488//binding;GO:0016491//oxidoreductase activity	GO:0005618//cell wall;GO:0016023//cytoplasmic membrane-bounded vesicle;GO:0016020//membrane
CL19704.Contig2_DB	1	17.19	21.43	19.5	19.3733	4.82	5.77	1.79	4.12667	41.25	29.7	31.13	34.0267	--	-	-	-
CL2042.Contig3_DB	1	23.48	21.37	13.16	19.3367	10.14	7.3	11.02	9.48667	21.71	18.73	24.99	21.81	Bidirectional sugar transporter SWEET1a OS=Oryza sativa subsp. japonica GN=SWEET1A PE=2 SV=1	GO:0008643//carbohydrate transport	GO:0051119//sugar transmembrane transporter activity	GO:0005887//integral to plasma membrane;GO:0016023//cytoplasmic membrane-bounded vesicle
CL23032.Contig3_DB	1	12.41	28.25	16.69	19.1167	5.21	5.23	13.66	8.03333	16.06	16.51	25.44	19.3367	--	-	-	GO:0005737//cytoplasm
CL25123.Contig1_DB	1	15.96	18.72	22.58	19.0867	4.71	2.34	3.59	3.54667	14.5	20.22	21.83	18.85	Pentatricopeptide repeat-containing protein At3g57430, chloroplastic OS=Arabidopsis thaliana GN=PCMP-H81 PE=2 SV=2	GO:0031425//chloroplast RNA processing	-	GO:0009507//chloroplast
CL26534.Contig1_DB	1	22.8	12.73	21.55	19.0267	4.29	5.5	7.27	5.68667	24.94	18.81	15.5	19.75	--	GO:0030001//metal ion transport	GO:0046872//metal ion binding	-
CL20353.Contig1_DB	1	17.46	17.02	21.48	18.6533	8.58	11.84	11.14	10.52	30.21	24.77	22.09	25.69	SWI/SNF complex component SNF12 homolog OS=Arabidopsis thaliana GN=At5g14170 PE=1 SV=1	GO:0006281//DNA repair;GO:0010224//response to UV-B;GO:0048364//root development;GO:0000956//nuclear-transcribed mRNA catabolic process;GO:0008284//positive regulation of cell proliferation	-	GO:0005634//nucleus
CL8702.Contig1_DB	1	17.95	21.16	16.81	18.64	5.82	2.81	5.13	4.58667	16.47	10.85	17.57	14.9633	Vegetative cell wall protein gp1 OS=Chlamydomonas reinhardtii GN=GP1 PE=2 SV=1	GO:0019344//cysteine biosynthetic process	-	GO:0005886//plasma membrane;GO:0016021//integral to membrane
Unigene4755_DB	1	17.26	13.04	25.37	18.5567	6.69	4.66	12.85	8.06667	21.21	23.47	25.23	23.3033	Proline-rich receptor-like protein kinase PERK2 OS=Arabidopsis thaliana GN=PERK2 PE=2 SV=3	GO:0051567//histone H3-K9 methylation;GO:0006342//chromatin silencing	GO:0003824//catalytic activity	GO:0005737//cytoplasm;GO:0005886//plasma membrane
CL23660.Contig1_DB	1	17.76	20.39	17.17	18.44	9.76	6.73	2.86	6.45	30.52	14.09	46.98	30.53	DNA-directed RNA polymerase II subunit RPB1 OS=Arabidopsis thaliana GN=RPB205 PE=1 SV=3	GO:0019318//hexose metabolic process	GO:0030246//carbohydrate binding;GO:0016853//isomerase activity	GO:0016023//cytoplasmic membrane-bounded vesicle
CL19428.Contig1_DB	1	17.05	28.67	9.05	18.2567	10.65	7.29	15.44	11.1267	21.61	22.85	26.42	23.6267	F-box only protein 13 OS=Arabidopsis thaliana GN=FBX13 PE=2 SV=2	-	-	-
CL5238.Contig4_DB	1	16.9	17.62	19.88	18.1333	5.83	3.11	3.71	4.21667	28.32	12.92	11.36	17.5333	--	-	-	-
Unigene173_DB	1	12.94	29.33	11.72	17.9967	3.27	5.83	8.78	5.96	11.45	15.14	18.83	15.14	--	-	-	-
CL21693.Contig2_DB	1	16.25	23.78	13.28	17.77	4.08	7.84	7.75	6.55667	14.12	13.91	19.32	15.7833	--	-	-	-
CL4978.Contig1_DB	1	16.14	13	24.07	17.7367	6.11	2.23	9.85	6.06333	22.53	19.63	21.66	21.2733	Protein ELF4-LIKE 4 OS=Arabidopsis thaliana GN=EFL4 PE=2 SV=1	-	-	-
CL10415.Contig1_DB	1	17.72	17.59	17.74	17.6833	6.24	8.87	8.11	7.74	21.8	18.27	15.07	18.38	E3 ubiquitin-protein ligase RING1-like OS=Arabidopsis thaliana GN=At3g19950 PE=2 SV=1	-	GO:0008270//zinc ion binding	-
Unigene37643_DB	1	18	12.16	22.78	17.6467	5.29	2.03	5.57	4.29667	18.91	20.16	29.3	22.79	U-box domain-containing protein 16 OS=Arabidopsis thaliana GN=PUB16 PE=2 SV=1	GO:0016567//protein ubiquitination	GO:0004842//ubiquitin-protein ligase activity	GO:0009536//plastid;GO:0000151//ubiquitin ligase complex
CL14181.Contig1_DB	1	17.73	18.02	17.02	17.59	6.84	4.83	13.07	8.24667	18.81	38.66	14.66	24.0433	Chitinase-like protein 1 OS=Arabidopsis thaliana GN=CTL1 PE=1 SV=1	GO:0009750//response to fructose stimulus;GO:0043255//regulation of carbohydrate biosynthetic process;GO:0009611//response to wounding;GO:0009805//coumarin biosynthetic process;GO:0006833//water transport;GO:0009825//multidimensional cell growth;GO:0006816//calcium ion transport;GO:0010075//regulation of meristem growth;GO:0009651//response to salt stress;GO:0006032//chitin catabolic process;GO:0…	GO:0004568//chitinase activity;GO:0030247//polysaccharide binding	GO:0048046//apoplast;GO:0016023//cytoplasmic membrane-bounded vesicle;GO:0005794//Golgi apparatus;GO:0005886//plasma membrane
Unigene35413_DB	1	22.59	21.22	8.93	17.58	8.06	7.26	12.57	9.29667	17.6	18.44	32.69	22.91	Vegetative cell wall protein gp1 OS=Chlamydomonas reinhardtii GN=GP1 PE=2 SV=1	GO:0030001//metal ion transport	GO:0046872//metal ion binding	-
CL19145.Contig3_DB	1	19.05	17.19	16.46	17.5667	5.94	8.63	8.75	7.77333	22.92	15.98	18.8	19.2333	--	-	-	-
CL16839.Contig1_DB	1	23.48	14.13	15.05	17.5533	9.92	7.59	12	9.83667	17.21	34.86	17.46	23.1767	Ocs element-binding factor 1 OS=Zea mays GN=OBF1 PE=2 SV=2	GO:0006355//regulation of transcription, DNA-dependent	GO:0003700//sequence-specific DNA binding transcription factor activity;GO:0043565//sequence-specific DNA binding	GO:0009536//plastid
CL898.Contig2_DB	1	18.46	21.27	12.68	17.47	7.57	6.28	9.3	7.71667	16.46	28.44	25.78	23.56	--	-	-	-
CL10730.Contig1_DB	1	16.94	22.09	13.32	17.45	4.42	3.5	6.39	4.77	18.19	18.16	31.29	22.5467	Anthranilate N-benzoyltransferase protein 1 OS=Dianthus caryophyllus GN=HCBT1 PE=1 SV=1	-	GO:0003676//nucleic acid binding;GO:0016747//transferase activity, transferring acyl groups other than amino-acyl groups;GO:0000166//nucleotide binding	-
Unigene44698_DB	1	18.34	18.11	15.87	17.44	4.55	7.32	6.75	6.20667	25.38	27.76	21.41	24.85	Proline transporter 1 OS=Oryza sativa subsp. japonica GN=PROT1 PE=2 SV=1	GO:0006865//amino acid transport	GO:0022891//substrate-specific transmembrane transporter activity	GO:0016021//integral to membrane
Unigene363_DB	1	22.4	18.28	11.59	17.4233	4.08	5.65	6.83	5.52	16.95	30.65	14.09	20.5633	Vegetative cell wall protein gp1 OS=Chlamydomonas reinhardtii GN=GP1 PE=2 SV=1	-	-	GO:0016023//cytoplasmic membrane-bounded vesicle;GO:0016020//membrane
CL16015.Contig2_DB	1	18.24	20.48	13.54	17.42	4.41	2.56	1.57	2.84667	22.37	31.7	19.26	24.4433	Zinc finger protein 4 OS=Arabidopsis thaliana GN=ZFP4 PE=2 SV=2	-	-	-
Unigene32271_DB	1	19.48	22.3	10.47	17.4167	3.18	6.78	4.9	4.95333	18.08	16.61	15.82	16.8367	--	-	-	-
CL1293.Contig8_DB	1	14.05	25.79	12.16	17.3333	0	4.39	7.36	3.91667	20.61	8.08	21.78	16.8233	--	-	-	GO:0009536//plastid
CL13574.Contig1_DB	1	22.78	12.48	16.36	17.2067	7.11	6.98	10.7	8.26333	18.72	26.41	14.76	19.9633	Probable methyltransferase PMT21 OS=Arabidopsis thaliana GN=ERD3 PE=2 SV=1	GO:0009269//response to desiccation;GO:0009409//response to cold;GO:0016310//phosphorylation;GO:0009737//response to abscisic acid stimulus;GO:0032259//methylation;GO:0009651//response to salt stress	GO:0016301//kinase activity;GO:0008168//methyltransferase activity	GO:0005768//endosome;GO:0005794//Golgi apparatus;GO:0005802//trans-Golgi network
Unigene40507_DB	1	18.96	18	14.04	17	3	4.04	10.06	5.7	12.65	17.96	17.2	15.9367	Two-component response regulator ARR1 OS=Arabidopsis thaliana GN=ARR1 PE=1 SV=2	GO:0006355//regulation of transcription, DNA-dependent	GO:0003700//sequence-specific DNA binding transcription factor activity;GO:0003677//DNA binding;GO:0003682//chromatin binding	GO:0005634//nucleus
CL7113.Contig12_DB	1	21.6	11.47	17.84	16.97	5.3	3.55	10.14	6.33	20.35	14	19.18	17.8433	Cytochrome P450 71A1 OS=Persea americana GN=CYP71A1 PE=1 SV=2	GO:0055114//oxidation-reduction process	GO:0020037//heme binding;GO:0016705//oxidoreductase activity, acting on paired donors, with incorporation or reduction of molecular oxygen;GO:0004497//monooxygenase activity;GO:0005506//iron ion binding;GO:0009055//electron carrier activity	-
CL12951.Contig1_DB	1	28.64	16.53	5.73	16.9667	6.96	2.35	9.48	6.26333	16.86	31.32	21.15	23.11	--	-	-	-
CL16758.Contig1_DB	1	19.44	16.82	14.3	16.8533	9.31	5.94	6.27	7.17333	12.85	14.66	25	17.5033	Uncharacterized acetyltransferase At3g50280 OS=Arabidopsis thaliana GN=At3g50280 PE=1 SV=1	-	GO:0016747//transferase activity, transferring acyl groups other than amino-acyl groups	GO:0009536//plastid
CL8367.Contig1_DB	1	14.15	14.44	21.76	16.7833	11.33	6.91	9.08	9.10667	23.86	25.53	19.87	23.0867	--	GO:0010103//stomatal complex morphogenesis;GO:0016226//iron-sulfur cluster assembly;GO:0010027//thylakoid membrane organization;GO:0010228//vegetative to reproductive phase transition of meristem;GO:0048481//ovule development;GO:0045893//positive regulation of transcription, DNA-dependent;GO:0009793//embryo development ending in seed dormancy	-	GO:0005739//mitochondrion;GO:0009507//chloroplast
Unigene23472_DB	1	20.53	15.91	13.09	16.51	6.07	9.14	11.83	9.01333	20.65	21.39	20.89	20.9767	--	-	-	-
CL25835.Contig1_DB	1	16.91	16.13	16.12	16.3867	1.91	8.71	4.73	5.11667	15.01	15.1	18.97	16.36	Vegetative cell wall protein gp1 OS=Chlamydomonas reinhardtii GN=GP1 PE=2 SV=1	-	-	-
Unigene3712_DB	1	16.87	19.6	12.65	16.3733	6.96	3.5	9.17	6.54333	22.51	17.3	13.1	17.6367	Vegetative cell wall protein gp1 OS=Chlamydomonas reinhardtii GN=GP1 PE=2 SV=1	-	-	-
CL21342.Contig1_DB	1	17.81	19.6	11.49	16.3	2.08	4.76	5.29	4.04333	11.61	22.09	18.15	17.2833	Steroid 5-alpha-reductase DET2 OS=Gossypium hirsutum GN=DET2 PE=1 SV=1	GO:0016132//brassinosteroid biosynthetic process;GO:0010268//brassinosteroid homeostasis;GO:0055114//oxidation-reduction process	GO:0003865//3-oxo-5-alpha-steroid 4-dehydrogenase activity;GO:0009917//sterol 5-alpha reductase activity	GO:0005737//cytoplasm;GO:0016021//integral to membrane
CL28607.Contig2_DB	1	22.73	16.32	9.68	16.2433	3.37	1.81	5.9	3.69333	14.48	20.47	10.6	15.1833	Scarecrow-like protein 15 OS=Arabidopsis thaliana GN=SCL15 PE=2 SV=3	-	-	-
CL2780.Contig6_DB	1	21.2	21.55	5.67	16.14	8.25	6.04	6.22	6.83667	12.95	21.79	13.97	16.2367	Vegetative cell wall protein gp1 OS=Chlamydomonas reinhardtii GN=GP1 PE=2 SV=1	-	-	-
CL13033.Contig1_DB	1	14.4	18.12	15.77	16.0967	3.5	4.99	7.91	5.46667	22.79	15.16	8.47	15.4733	Scarecrow-like protein 3 OS=Arabidopsis thaliana GN=SCL3 PE=2 SV=1	GO:0006355//regulation of transcription, DNA-dependent	-	-
CL18447.Contig1_DB	1	17.08	13.58	17.63	16.0967	3.26	4.41	9.36	5.67667	20.5	19	14.24	17.9133	Digalactosyldiacylglycerol synthase 1, chloroplastic OS=Lotus japonicus GN=DGD1 PE=2 SV=1	GO:0019375//galactolipid biosynthetic process	GO:0046480//galactolipid galactosyltransferase activity	GO:0005739//mitochondrion;GO:0009707//chloroplast outer membrane
CL12183.Contig2_DB	1	16.06	15.83	16.21	16.0333	9.74	4.54	9.11	7.79667	19.18	17.12	21.83	19.3767	Formin-like protein 20 OS=Arabidopsis thaliana GN=FH20 PE=2 SV=3	GO:0010207//photosystem II assembly	-	GO:0009507//chloroplast
CL17704.Contig3_DB	1	13.9	17.33	16.64	15.9567	3.97	10.38	9.35	7.9	25.69	13.07	17.22	18.66	ASC1-like protein 1 OS=Oryza sativa subsp. japonica GN=Os02g0581300 PE=2 SV=1	GO:0006629//lipid metabolic process	-	GO:0016021//integral to membrane;GO:0005789//endoplasmic reticulum membrane
Unigene1897_DB	1	19.43	16.67	10.8	15.6333	6.05	3.87	7.19	5.70333	9.83	15.87	19.03	14.91	tRNA-specific adenosine deaminase, chloroplastic OS=Arabidopsis thaliana GN=TADA PE=1 SV=1	GO:0009231//riboflavin biosynthetic process;GO:0055114//oxidation-reduction process	GO:0008835//diaminohydroxyphosphoribosylaminopyrimidine deaminase activity;GO:0008270//zinc ion binding	GO:0009507//chloroplast
CL4712.Contig7_DB	1	11.52	17.05	18.32	15.63	4.77	8.72	4.55	6.01333	18.2	20.37	34.13	24.2333	Peptidyl-prolyl cis-trans isomerase FKBP13, chloroplastic OS=Arabidopsis thaliana GN=FKBP13 PE=1 SV=2	GO:0010103//stomatal complex morphogenesis;GO:0000413//protein peptidyl-prolyl isomerization;GO:0006457//protein folding;GO:0019288//isopentenyl diphosphate biosynthetic process, mevalonate-independent pathway;GO:0015995//chlorophyll biosynthetic process;GO:0016117//carotenoid biosynthetic process;GO:0006636//unsaturated fatty acid biosynthetic process	GO:0003755//peptidyl-prolyl cis-trans isomerase activity;GO:0005528//FK506 binding;GO:0005515//protein binding	GO:0016020//membrane;GO:0009543//chloroplast thylakoid lumen
Unigene4231_DB	1	17.21	18.27	11.02	15.5	7	8.66	7.03	7.56333	23.73	9.93	24.88	19.5133	Sulfate transporter 3.1 OS=Arabidopsis thaliana GN=SULTR3;1 PE=2 SV=1	GO:0008272//sulfate transport;GO:0055085//transmembrane transport	GO:0008271//secondary active sulfate transmembrane transporter activity	GO:0016021//integral to membrane
CL1355.Contig2_DB	1	16.64	10.28	19.16	15.36	2.89	4.77	7.48	5.04667	12.82	14.24	11.91	12.99	Chaperone protein dnaJ 15 OS=Arabidopsis thaliana GN=ATJ15 PE=1 SV=1	-	-	-
CL14405.Contig1_DB	1	31.19	7.89	6.85	15.31	2.05	0	2.32	1.45667	31.75	4.25	26.8	20.9333	Polyol transporter 5 OS=Arabidopsis thaliana GN=PLT5 PE=1 SV=2	GO:0015798//myo-inositol transport;GO:0015797//mannitol transport;GO:0015795//sorbitol transport;GO:0015753//D-xylose transport;GO:0015757//galactose transport;GO:0055085//transmembrane transport;GO:0015752//D-ribose transport;GO:0015758//glucose transport;GO:0015793//glycerol transport	GO:0005355//glucose transmembrane transporter activity;GO:0015148//D-xylose transmembrane transporter activity;GO:0015575//mannitol transmembrane transporter activity;GO:0005354//galactose transmembrane transporter activity;GO:0015168//glycerol transmembrane transporter activity;GO:0005365//myo-inositol transmembrane transporter activity;GO:0015576//sorbitol transmembrane transporter activity;GO:…	GO:0005886//plasma membrane;GO:0016021//integral to membrane
Unigene43809_DB	1	15.49	13.48	16.58	15.1833	4.8	2.03	5.7	4.17667	19.99	20.01	16.94	18.98	Receptor-like protein kinase HSL1 OS=Arabidopsis thaliana GN=HSL1 PE=2 SV=1	GO:0010103//stomatal complex morphogenesis;GO:0010363//regulation of plant-type hypersensitive response;GO:0006612//protein targeting to membrane;GO:0010051//xylem and phloem pattern formation;GO:0006468//protein phosphorylation;GO:0007165//signal transduction;GO:0009963//positive regulation of flavonoid biosynthetic process;GO:0002237//response to molecule of bacterial origin;GO:0048443//stamen …	GO:0004674//protein serine/threonine kinase activity;GO:0005524//ATP binding	GO:0016020//membrane;GO:0016023//cytoplasmic membrane-bounded vesicle
CL13085.Contig2_DB	1	16.07	14.26	15.13	15.1533	5.47	7.28	8.05	6.93333	16.61	16.64	14.71	15.9867	F-box protein At1g47056 OS=Arabidopsis thaliana GN=At1g47056 PE=2 SV=1	-	-	GO:0005737//cytoplasm
CL10394.Contig1_DB	1	13.01	15.54	16.63	15.06	7.39	7.11	6.11	6.87	25.95	14.96	16.99	19.3	Molybdate transporter 2 OS=Arabidopsis thaliana GN=MOT2 PE=1 SV=2	GO:0090414//molybdate ion export from vacuole;GO:0008272//sulfate transport	GO:0015098//molybdate ion transmembrane transporter activity;GO:0015116//sulfate transmembrane transporter activity	GO:0009705//plant-type vacuole membrane;GO:0016021//integral to membrane
CL9940.Contig1_DB	1	5.82	24.34	14.4	14.8533	1.68	5.6	11.9	6.39333	17.56	20.19	20.16	19.3033	Protein PHYTOCHROME KINASE SUBSTRATE 3 OS=Arabidopsis thaliana GN=PKS3 PE=2 SV=2	-	-	-
CL18709.Contig1_DB	1	14.9	14.23	15.23	14.7867	7.96	4.57	10.25	7.59333	21.2	15.39	21.59	19.3933	--	GO:0048440//carpel development;GO:0048653//anther development	GO:0003677//DNA binding	GO:0005654//nucleoplasm
CL1669.Contig1_DB	1	11.95	19.87	12.49	14.77	6.32	6.38	9.91	7.53667	17.18	15.44	22.79	18.47	Proline-rich receptor-like protein kinase PERK10 OS=Arabidopsis thaliana GN=PERK10 PE=1 SV=2	-	-	GO:0009536//plastid
CL10380.Contig3_DB	1	11.66	23.72	8.85	14.7433	3.33	2.58	6.12	4.01	32.92	20.93	12.33	22.06	Arginine/serine-rich protein 45 OS=Arabidopsis thaliana GN=SR45 PE=1 SV=1	-	-	-
CL20724.Contig1_DB	1	8.59	13.73	21.86	14.7267	5.75	4.4	5.24	5.13	24.17	17.13	28.63	23.31	DEAD-box ATP-dependent RNA helicase 25 OS=Oryza sativa subsp. japonica GN=Os01g0618400 PE=2 SV=1	GO:0009414//response to water deprivation;GO:0009409//response to cold;GO:0009651//response to salt stress	GO:0008026//ATP-dependent helicase activity;GO:0003723//RNA binding;GO:0005524//ATP binding	GO:0009507//chloroplast
CL16468.Contig1_DB	1	13.36	18.63	11.97	14.6533	6.48	6.69	11.16	8.11	21.82	18.58	17.13	19.1767	Amino acid permease 1 OS=Arabidopsis thaliana GN=AAP1 PE=1 SV=1	GO:0006865//amino acid transport	GO:0005275//amine transmembrane transporter activity	GO:0005773//vacuole;GO:0016023//cytoplasmic membrane-bounded vesicle;GO:0005886//plasma membrane;GO:0016021//integral to membrane
Unigene1086_DB	1	16.03	13.49	13.87	14.4633	6.48	4.91	5.29	5.56	17.45	17.35	13.67	16.1567	--	GO:0005975//carbohydrate metabolic process	GO:0004553//hydrolase activity, hydrolyzing O-glycosyl compounds	GO:0005739//mitochondrion
Unigene38749_DB	1	15.04	15.99	11.96	14.33	4.57	5.85	12.83	7.75	19.96	13.7	23.64	19.1	Bidirectional sugar transporter SWEET1b OS=Oryza sativa subsp. indica GN=SWEET1B PE=3 SV=1	GO:0008643//carbohydrate transport	GO:0051119//sugar transmembrane transporter activity	GO:0005887//integral to plasma membrane;GO:0016023//cytoplasmic membrane-bounded vesicle
CL9940.Contig5_DB	1	8.43	24.85	9.47	14.25	1.81	3.14	4.29	3.08	12.72	14.54	14.91	14.0567	Protein PHYTOCHROME KINASE SUBSTRATE 3 OS=Arabidopsis thaliana GN=PKS3 PE=2 SV=2	-	-	GO:0009506//plasmodesma
CL14854.Contig2_DB	1	15.48	13.17	13.72	14.1233	5.23	2.16	7.6	4.99667	10.58	17.35	13.63	13.8533	Lysine-rich arabinogalactan protein 19 OS=Arabidopsis thaliana GN=AGP19 PE=2 SV=2	-	-	-
CL11626.Contig1_DB	1	13.73	14.55	14.07	14.1167	3.79	5.38	8.73	5.96667	15.92	14.94	10.48	13.78	Ethylene-insensitive protein 2 OS=Arabidopsis thaliana GN=EIN2 PE=1 SV=1	-	GO:0005488//binding;GO:0016491//oxidoreductase activity	GO:0016023//cytoplasmic membrane-bounded vesicle;GO:0016020//membrane
CL8584.Contig2_DB	1	15.7	16.09	10.45	14.08	6.73	4.8	12.54	8.02333	14.91	22.51	18.94	18.7867	Formin-like protein 14 OS=Arabidopsis thaliana GN=FH14 PE=3 SV=3	-	-	-
CL2310.Contig2_DB	1	11.43	14.43	15.81	13.89	6.86	6.49	7.75	7.03333	17.35	15.66	24.17	19.06	--	GO:0006661//phosphatidylinositol biosynthetic process	-	GO:0009536//plastid;GO:0005739//mitochondrion
CL622.Contig1_DB	1	26.87	9.83	4.52	13.74	6.12	7.01	5.62	6.25	16.39	19.74	14.67	16.9333	--	-	-	-
CL12770.Contig3_DB	1	20.85	14.23	5.96	13.68	2.79	1.59	4.32	2.9	8.76	16.44	12.89	12.6967	Systemin receptor SR160 OS=Solanum peruvianum PE=1 SV=1	GO:0010584//pollen exine formation;GO:0010268//brassinosteroid homeostasis;GO:0009911//positive regulation of flower development;GO:0009729//detection of brassinosteroid stimulus;GO:0009826//unidimensional cell growth;GO:0006468//protein phosphorylation;GO:0009647//skotomorphogenesis;GO:0010224//response to UV-B;GO:0048657//tapetal cell differentiation;GO:0009742//brassinosteroid mediated signali…	GO:0046982//protein heterodimerization activity;GO:0004674//protein serine/threonine kinase activity;GO:0004903//growth hormone receptor activity;GO:0042803//protein homodimerization activity;GO:0005524//ATP binding	GO:0016023//cytoplasmic membrane-bounded vesicle;GO:0043234//protein complex;GO:0005768//endosome;GO:0005886//plasma membrane
CL2451.Contig10_DB	1	8.21	23.37	9.05	13.5433	5.03	5.11	2.62	4.25333	13.01	15.86	21.42	16.7633	Serine carboxypeptidase-like 18 OS=Arabidopsis thaliana GN=SCPL18 PE=2 SV=2	GO:0006508//proteolysis	GO:0004185//serine-type carboxypeptidase activity	GO:0016023//cytoplasmic membrane-bounded vesicle
CL3605.Contig2_DB	1	21.34	12.34	6.59	13.4233	4.31	7.7	7.26	6.42333	17.65	18.02	13.32	16.33	O-methyltransferase ZRP4 OS=Zea mays GN=ZRP4 PE=2 SV=1	GO:0032259//methylation	GO:0008171//O-methyltransferase activity;GO:0046983//protein dimerization activity	-
CL22165.Contig1_DB	1	8.54	15.05	16.4	13.33	5.34	2.62	3.61	3.85667	15.87	14.76	11.47	14.0333	--	-	GO:0008375//acetylglucosaminyltransferase activity	GO:0016020//membrane;GO:0016023//cytoplasmic membrane-bounded vesicle
CL3710.Contig2_DB	1	13.1	14.75	11.99	13.28	1.8	3.68	2.64	2.70667	11.53	12.59	7.83	10.65	Vegetative cell wall protein gp1 OS=Chlamydomonas reinhardtii GN=GP1 PE=2 SV=1	-	-	-
CL15307.Contig3_DB	1	15.24	11.22	13.12	13.1933	2.43	6.11	6.25	4.93	14.62	13.08	12.9	13.5333	HVA22-like protein i OS=Arabidopsis thaliana GN=HVA22I PE=2 SV=2	-	-	GO:0016023//cytoplasmic membrane-bounded vesicle
CL11266.Contig2_DB	1	10.86	15.66	12.85	13.1233	4.73	7.31	6.49	6.17667	12.13	16.2	17.91	15.4133	--	GO:0006014//D-ribose metabolic process;GO:0016310//phosphorylation	GO:0004747//ribokinase activity	GO:0009507//chloroplast
CL7721.Contig1_DB	1	21.78	9.65	7.48	12.97	4.79	6.36	6.44	5.86333	13.8	10.84	16.67	13.77	Cytochrome P450 710A1 OS=Arabidopsis thaliana GN=CYP710A1 PE=1 SV=1	GO:0022900//electron transport chain	GO:0000249//C-22 sterol desaturase activity;GO:0009055//electron carrier activity;GO:0004497//monooxygenase activity;GO:0005506//iron ion binding;GO:0020037//heme binding	GO:0016023//cytoplasmic membrane-bounded vesicle
CL10807.Contig4_DB	1	8.32	18.67	11.04	12.6767	2.69	5.15	2.43	3.42333	14.95	6.68	26.29	15.9733	Probable calcium-binding protein CML35 OS=Arabidopsis thaliana GN=CML35 PE=1 SV=2	-	GO:0005509//calcium ion binding	GO:0009536//plastid
CL7110.Contig2_DB	1	9.25	9.71	18.24	12.4	6.81	6.55	7.32	6.89333	15.79	19.13	17.78	17.5667	Vegetative cell wall protein gp1 OS=Chlamydomonas reinhardtii GN=GP1 PE=2 SV=1	GO:0006655//phosphatidylglycerol biosynthetic process;GO:0032968//positive regulation of transcription elongation from RNA polymerase II promoter;GO:0019288//isopentenyl diphosphate biosynthetic process, mevalonate-independent pathway;GO:0009902//chloroplast relocation;GO:0034660//ncRNA metabolic process;GO:0045893//positive regulation of transcription, DNA-dependent;GO:0042793//transcription fro…	-	GO:0009508//plastid chromosome
CL14311.Contig1_DB	1	16.98	9.53	10.65	12.3867	4.98	4.64	8.21	5.94333	20.69	15.1	6.83	14.2067	BTB/POZ domain-containing protein At1g67900 OS=Arabidopsis thaliana GN=At1g67900 PE=1 SV=1	-	-	-
CL19984.Contig7_DB	1	19.07	0	17.6	12.2233	1.32	1.81	2.47	1.86667	25.39	14.34	16.31	18.68	Expansin-B6 OS=Oryza sativa subsp. japonica GN=EXPB6 PE=2 SV=1	GO:0019953//sexual reproduction	-	GO:0005576//extracellular region;GO:0016020//membrane;GO:0016023//cytoplasmic membrane-bounded vesicle;GO:0005618//cell wall
CL5312.Contig1_DB	1	8.5	14.32	13.82	12.2133	6.74	2.77	5.45	4.98667	14.81	16.99	13.88	15.2267	WD repeat-containing protein LWD1 OS=Arabidopsis thaliana GN=LWD1 PE=2 SV=1	GO:0009718//anthocyanin-containing compound biosynthetic process;GO:0048573//photoperiodism, flowering;GO:0043153//entrainment of circadian clock by photoperiod	GO:0044212//transcription regulatory region DNA binding;GO:0000166//nucleotide binding	GO:0005634//nucleus
CL19920.Contig1_DB	1	15.74	8.58	11.44	11.92	2.58	6.28	6.09	4.98333	18.3	14.08	15.71	16.03	Probable carboxylesterase 12 OS=Arabidopsis thaliana GN=CXE12 PE=2 SV=1	-	-	-
CL25881.Contig2_DB	1	12.59	7.65	15.35	11.8633	5.4	7.4	7.61	6.80333	20.04	13.35	13.67	15.6867	50S ribosomal protein L15, chloroplastic OS=Arabidopsis thaliana GN=RPL15 PE=1 SV=2	GO:0006412//translation;GO:0006354//DNA-dependent transcription, elongation;GO:0009220//pyrimidine ribonucleotide biosynthetic process;GO:0042254//ribosome biogenesis	GO:0003735//structural constituent of ribosome	GO:0005739//mitochondrion;GO:0015934//large ribosomal subunit
CL10831.Contig5_DB	1	13.41	11.64	10.53	11.86	2.48	8.89	5.64	5.67	15.47	14.11	15.75	15.11	Aquaporin NIP3-1 OS=Oryza sativa subsp. japonica GN=NIP3-1 PE=2 SV=2	GO:0015700//arsenite transport;GO:0015706//nitrate transport;GO:0035445//borate transmembrane transport;GO:0010106//cellular response to iron ion starvation;GO:0071918//urea transmembrane transport;GO:0006826//iron ion transport;GO:0010167//response to nitrate;GO:0015793//glycerol transport;GO:0046685//response to arsenic-containing substance;GO:0080029//cellular response to boron-containing subs…	GO:0015204//urea transmembrane transporter activity;GO:0015168//glycerol transmembrane transporter activity;GO:0015105//arsenite transmembrane transporter activity;GO:0015250//water channel activity;GO:0080138//borate uptake transmembrane transporter activity	GO:0016328//lateral plasma membrane;GO:0016021//integral to membrane
CL26809.Contig2_DB	1	11.91	10.65	12.91	11.8233	3.33	4.19	4.09	3.87	13.15	10.07	9.38	10.8667	Vegetative cell wall protein gp1 OS=Chlamydomonas reinhardtii GN=GP1 PE=2 SV=1	-	-	GO:0016023//cytoplasmic membrane-bounded vesicle;GO:0005783//endoplasmic reticulum;GO:0005739//mitochondrion
Unigene3163_DB	1	11.87	8.91	14.57	11.7833	4.11	3.87	6.33	4.77	14.79	10.77	8.91	11.49	Proline-rich receptor-like protein kinase PERK2 OS=Arabidopsis thaliana GN=PERK2 PE=2 SV=3	-	-	-
CL6593.Contig3_DB	1	11.43	13.4	10.44	11.7567	0	4.29	2.24	2.17667	11.86	12.4	15.2	13.1533	Formin-like protein 7 OS=Arabidopsis thaliana GN=FH7 PE=2 SV=1	GO:0016556//mRNA modification	GO:0004672//protein kinase activity;GO:0018786;GO:0000166//nucleotide binding	GO:0009941//chloroplast envelope;GO:0009570//chloroplast stroma
Unigene281_DB	1	10.75	10.84	13.3	11.63	3.91	4.85	5.54	4.76667	17.85	11.04	19.39	16.0933	Probable polyribonucleotide nucleotidyltransferase 1, chloroplastic OS=Oryza sativa subsp. japonica GN=PNP1 PE=2 SV=1	GO:0016036//cellular response to phosphate starvation;GO:0016120//carotene biosynthetic process;GO:0016123//xanthophyll biosynthetic process;GO:0010323//negative regulation of isopentenyl diphosphate biosynthetic process, mevalonate-independent pathway;GO:0006397//mRNA processing;GO:0015995//chlorophyll biosynthetic process;GO:0006402//mRNA catabolic process;GO:0008033//tRNA processing;GO:0090305…	GO:0004654//polyribonucleotide nucleotidyltransferase activity;GO:0003723//RNA binding;GO:0000175//3'-5'-exoribonuclease activity	GO:0009570//chloroplast stroma
CL20387.Contig1_DB	1	9.16	13.46	12.2	11.6067	4.01	3.82	4.9	4.24333	9.68	13.57	17.98	13.7433	Vegetative cell wall protein gp1 OS=Chlamydomonas reinhardtii GN=GP1 PE=2 SV=1	-	-	-
CL5664.Contig1_DB	1	11.55	11.45	11.79	11.5967	1.13	3.03	3.57	2.57667	5.24	9.38	13.33	9.31667	--	-	-	-
CL29448.Contig3_DB	1	13.87	0	20.55	11.4733	5.48	2.26	7.17	4.97	15.44	11.94	18.95	15.4433	indole-2-monooxygenase OS=Zea mays GN=CYP71C4 PE=1 SV=1	-	GO:0046872//metal ion binding;GO:0016491//oxidoreductase activity	GO:0016023//cytoplasmic membrane-bounded vesicle
CL30.Contig1_DB	1	13.42	8.22	12.44	11.36	3.98	4.17	8.26	5.47	11.33	11.91	12.76	12	UPF0496 protein 4 OS=Oryza sativa subsp. indica GN=OsI_033149 PE=3 SV=2	-	-	GO:0016020//membrane
CL25414.Contig2_DB	1	10.49	8.41	14.9	11.2667	3.91	2.51	6.62	4.34667	9.81	12.83	14.06	12.2333	--	GO:0015706//nitrate transport;GO:0010167//response to nitrate;GO:0019344//cysteine biosynthetic process	-	GO:0005886//plasma membrane;GO:0005774//vacuolar membrane;GO:0005739//mitochondrion
CL21798.Contig2_DB	1	12.44	9.63	11.64	11.2367	3.55	4.38	4.8	4.24333	9.12	9.27	13.35	10.58	--	-	-	GO:0005634//nucleus;GO:0005829//cytosol
CL2853.Contig1_DB	1	13.92	9.15	10.63	11.2333	1.09	2.65	7.47	3.73667	12.81	10.39	11.42	11.54	Formin-like protein 20 OS=Arabidopsis thaliana GN=FH20 PE=2 SV=3	-	GO:0003676//nucleic acid binding;GO:0000166//nucleotide binding	-
CL19611.Contig3_DB	1	7.84	11.59	14.13	11.1867	4.12	2.55	0.9	2.52333	13.35	7.07	11.26	10.56	Formin-like protein 5 OS=Oryza sativa subsp. japonica GN=FH5 PE=2 SV=2	-	-	-
CL9186.Contig1_DB	1	15.23	9.09	8.93	11.0833	5.09	2.37	6.76	4.74	10.77	10.53	13.38	11.56	Probable pre-mRNA-splicing factor ATP-dependent RNA helicase OS=Arabidopsis thaliana GN=At3g26560 PE=1 SV=2	-	GO:0004386//helicase activity;GO:0003676//nucleic acid binding;GO:0000166//nucleotide binding	GO:0044444//cytoplasmic part
CL14653.Contig2_DB	1	5.65	12.45	15.09	11.0633	4.92	3.06	6.29	4.75667	12.23	17.16	14.07	14.4867	Proline-rich receptor-like protein kinase PERK4 OS=Arabidopsis thaliana GN=PERK4 PE=1 SV=1	GO:0016310//phosphorylation;GO:0007165//signal transduction;GO:0007275//multicellular organismal development	GO:0004674//protein serine/threonine kinase activity	GO:0009536//plastid;GO:0016020//membrane
CL7474.Contig1_DB	1	13.58	10.58	8.81	10.99	4.56	2.78	5.73	4.35667	16.85	14.15	11.32	14.1067	Peroxisomal membrane protein PMP22 OS=Arabidopsis thaliana GN=PMP22 PE=1 SV=1	-	-	GO:0009941//chloroplast envelope;GO:0005778//peroxisomal membrane;GO:0016021//integral to membrane;GO:0005739//mitochondrion
Unigene37606_DB	1	10.72	6.1	16.05	10.9567	7.83	3.41	6	5.74667	15.64	12.06	19.5	15.7333	--	GO:0019318//hexose metabolic process	GO:0030246//carbohydrate binding;GO:0016853//isomerase activity	GO:0016023//cytoplasmic membrane-bounded vesicle
CL17329.Contig1_DB	1	10.07	11.05	11.72	10.9467	2.15	1.33	3.46	2.31333	6.39	10.8	9.27	8.82	BTB/POZ and MATH domain-containing protein 1 OS=Arabidopsis thaliana GN=BPM1 PE=1 SV=1	-	-	GO:0009536//plastid
Unigene38999_DB	1	8.56	14.26	10.01	10.9433	3.74	3.49	0.82	2.68333	19.77	10.34	7.63	12.58	Cinnamoyl-CoA reductase 1 OS=Arabidopsis thaliana GN=CCR1 PE=1 SV=1	GO:0046686//response to cadmium ion;GO:0044237//cellular metabolic process	GO:0003824//catalytic activity;GO:0050662//coenzyme binding;GO:0000166//nucleotide binding	-
Unigene35901_DB	1	10.68	13.49	7.92	10.6967	4.22	4.33	4.62	4.39	7.7	23.36	15.03	15.3633	--	-	-	-
CL12853.Contig8_DB	1	9.96	9.83	12.14	10.6433	4.39	5.66	2.68	4.24333	11.77	8.52	11.03	10.44	C-terminal processing peptidase, chloroplastic OS=Scenedesmus obliquus GN=ctpA PE=1 SV=1	GO:0006508//proteolysis	GO:0008236//serine-type peptidase activity	GO:0009543//chloroplast thylakoid lumen
CL5284.Contig4_DB	1	13.94	8.56	9.4	10.6333	2.88	3.11	2.39	2.79333	9.59	11.97	4.94	8.83333	F-box protein AFR OS=Arabidopsis thaliana GN=AFR PE=1 SV=2	GO:0009585//red, far-red light phototransduction	GO:0005515//protein binding	-
CL20521.Contig1_DB	1	10.58	0	20.93	10.5033	4.69	0	3.69	2.79333	29.49	12.14	11.35	17.66	NADH dehydrogenase [ubiquinone] 1 alpha subcomplex subunit 13-B OS=Arabidopsis thaliana GN=At2g33220 PE=2 SV=1	GO:0009793//embryo development ending in seed dormancy;GO:0009853//photorespiration;GO:0055114//oxidation-reduction process	GO:0003954//NADH dehydrogenase activity	GO:0005747//mitochondrial respiratory chain complex I;GO:0009507//chloroplast
CL7296.Contig1_DB	1	12.57	10.99	7.91	10.49	5.6	4.76	4.25	4.87	10.04	14.56	7.91	10.8367	Vegetative cell wall protein gp1 OS=Chlamydomonas reinhardtii GN=GP1 PE=2 SV=1	-	GO:0046872//metal ion binding	-
CL14038.Contig3_DB	1	18.89	6.53	5.66	10.36	4.62	4	8	5.54	13.96	20.48	11.17	15.2033	Tryptophan aminotransferase-related protein 2 OS=Arabidopsis thaliana GN=TAR2 PE=2 SV=1	GO:0009908//flower development;GO:0048364//root development;GO:0009888//tissue development;GO:0009793//embryo development ending in seed dormancy;GO:0048827//phyllome development;GO:0009628//response to abiotic stimulus;GO:0009987//cellular process;GO:0065007//biological regulation;GO:0008152//metabolic process	GO:0070547;GO:0016829//lyase activity;GO:0070546;GO:0070529	-
CL11065.Contig1_DB	1	11.57	7.45	11.97	10.33	1.93	2.73	4.47	3.04333	13.67	10.21	2.75	8.87667	Flavonol synthase/flavanone 3-hydroxylase OS=Petunia hybrida GN=FL PE=2 SV=1	GO:0055114//oxidation-reduction process	GO:0016706//oxidoreductase activity, acting on paired donors, with incorporation or reduction of molecular oxygen, 2-oxoglutarate as one donor, and incorporation of one atom each of oxygen into both donors	-
Unigene33091_DB	1	7.66	10.33	12.85	10.28	1.48	1.72	2.38	1.86	22.55	8.92	10.1	13.8567	Vegetative cell wall protein gp1 OS=Chlamydomonas reinhardtii GN=GP1 PE=2 SV=1	-	GO:0016772//transferase activity, transferring phosphorus-containing groups	GO:0009536//plastid
CL10492.Contig1_DB	1	5.93	16.57	8	10.1667	1.11	0.26	1.29	0.886667	9.96	12.37	13.6	11.9767	--	-	-	-
CL22776.Contig3_DB	1	6.86	12.68	10.84	10.1267	1.22	1.75	1.87	1.61333	10.59	7.18	10.81	9.52667	Thioredoxin H2-2 OS=Oryza sativa subsp. japonica GN=Os03g0800700 PE=2 SV=1	GO:0044710;GO:0009987//cellular process	-	-
CL18727.Contig2_DB	1	11.74	7.75	10.62	10.0367	3.96	2.23	3.86	3.35	17.15	8.79	9.03	11.6567	Proline-rich receptor-like protein kinase PERK2 OS=Arabidopsis thaliana GN=PERK2 PE=2 SV=3	-	-	-
CL7358.Contig1_DB	1	10.33	9.71	10	10.0133	2.67	2.19	2.72	2.52667	13.32	17.97	14.91	15.4	Leucine-rich repeat extensin-like protein 5 OS=Arabidopsis thaliana GN=LRX5 PE=2 SV=2	GO:0006629//lipid metabolic process;GO:0035556//intracellular signal transduction	GO:0004629//phospholipase C activity	GO:0005576//extracellular region;GO:0009536//plastid
CL18639.Contig1_DB	1	14.99	5.95	9.05	9.99667	5.11	4.88	3.45	4.48	16.62	15.37	9.93	13.9733	Pentatricopeptide repeat-containing protein At2g17033 OS=Arabidopsis thaliana GN=At2g17033 PE=2 SV=1	-	-	GO:0009536//plastid
CL24624.Contig1_DB	1	11.7	6.95	10.94	9.86333	2.44	1.73	3.33	2.5	16.1	10.23	6.44	10.9233	G-type lectin S-receptor-like serine/threonine-protein kinase At2g19130 OS=Arabidopsis thaliana GN=At2g19130 PE=2 SV=1	GO:0006468//protein phosphorylation;GO:0048544//recognition of pollen	GO:0004674//protein serine/threonine kinase activity;GO:0005524//ATP binding	GO:0016023//cytoplasmic membrane-bounded vesicle
CL13866.Contig2_DB	1	10.19	8.82	10.58	9.86333	4.79	5.98	4.59	5.12	15.58	13.07	15.38	14.6767	Rhodanese-like domain-containing protein 4A, chloroplastic OS=Arabidopsis thaliana GN=STR4A PE=2 SV=1	-	-	GO:0009535//chloroplast thylakoid membrane
Unigene2024_DB	1	5.81	10.47	13.14	9.80667	4.48	0.93	2.57	2.66	11.81	12.13	13.09	12.3433	--	-	-	GO:0016023//cytoplasmic membrane-bounded vesicle;GO:0016020//membrane
Unigene38317_DB	1	9.88	11.77	7.51	9.72	3.69	5.04	5.37	4.7	12.99	6.56	14.26	11.27	--	GO:0006355//regulation of transcription, DNA-dependent;GO:0009734//auxin mediated signaling pathway;GO:0006487//protein N-linked glycosylation	GO:0046983//protein dimerization activity;GO:0003830//beta-1,4-mannosylglycoprotein 4-beta-N-acetylglucosaminyltransferase activity	GO:0016020//membrane;GO:0005794//Golgi apparatus;GO:0005634//nucleus
CL12601.Contig1_DB	1	14.56	9.96	4.57	9.69667	4.8	3.02	3.62	3.81333	7.48	15.28	12.28	11.68	CASP-like protein Os02g0134500 OS=Oryza sativa subsp. japonica GN=Os02g0134500 PE=2 SV=2	-	-	-
CL13422.Contig1_DB	1	11.24	10.71	7.13	9.69333	2.21	2.89	2.98	2.69333	7.17	15.97	6.54	9.89333	ABC transporter G family member 5 OS=Arabidopsis thaliana GN=ABCG5 PE=2 SV=1	-	GO:0016887//ATPase activity;GO:0000166//nucleotide binding	-
CL15702.Contig2_DB	1	12.44	12.31	4.17	9.64	1.36	3	4.67	3.01	14.63	8.9	10.22	11.25	ATP-dependent helicase BRM OS=Arabidopsis thaliana GN=BRM PE=1 SV=1	GO:0000278//mitotic cell cycle;GO:0006396//RNA processing;GO:0009414//response to water deprivation;GO:0009651//response to salt stress;GO:0009408//response to heat;GO:0000956//nuclear-transcribed mRNA catabolic process	GO:0003677//DNA binding;GO:0005524//ATP binding;GO:0004386//helicase activity	GO:0005634//nucleus
Unigene31433_DB	1	12.42	9.55	6.56	9.51	3.59	4.11	4.15	3.95	15.39	12.82	11.91	13.3733	Heat shock 70 kDa protein 15 OS=Arabidopsis thaliana GN=HSP70-15 PE=1 SV=1	GO:0046686//response to cadmium ion;GO:0009408//response to heat	GO:0005524//ATP binding	GO:0005886//plasma membrane;GO:0005618//cell wall
CL246.Contig1_DB	1	8.15	9.52	10.74	9.47	6.28	4.75	5.07	5.36667	15.76	11.82	13.49	13.69	DEAD-box ATP-dependent RNA helicase 22 OS=Oryza sativa subsp. japonica GN=Os09g0383400 PE=2 SV=2	GO:0009220//pyrimidine ribonucleotide biosynthetic process	GO:0003676//nucleic acid binding;GO:0008026//ATP-dependent helicase activity;GO:0005524//ATP binding	GO:0009507//chloroplast
CL8477.Contig2_DB	1	9.03	6.61	12.7	9.44667	1.88	5.9	5.49	4.42333	19.05	9.28	9.78	12.7033	Vacuolar-sorting receptor 7 OS=Arabidopsis thaliana GN=VSR7 PE=2 SV=2	-	GO:0005509//calcium ion binding	GO:0016020//membrane;GO:0016023//cytoplasmic membrane-bounded vesicle;GO:0017119//Golgi transport complex
Unigene853_DB	1	8.83	6.16	13.31	9.43333	1.88	0	3.05	1.64333	10.77	16.13	6.95	11.2833	U-box domain-containing protein 16 OS=Arabidopsis thaliana GN=PUB16 PE=2 SV=1	GO:0016567//protein ubiquitination	GO:0004842//ubiquitin-protein ligase activity	GO:0009536//plastid;GO:0000151//ubiquitin ligase complex
Unigene38004_DB	1	6.63	11.48	10.05	9.38667	5.77	3.2	5.01	4.66	11.12	9.52	10.63	10.4233	Pentatricopeptide repeat-containing protein At4g37380, chloroplastic OS=Arabidopsis thaliana GN=PCMP-H48 PE=3 SV=1	GO:0009062//fatty acid catabolic process	-	-
CL4996.Contig1_DB	1	7.28	11.88	8.98	9.38	4.13	5.55	2.75	4.14333	11.65	8.44	13.54	11.21	Pentatricopeptide repeat-containing protein At4g21190 OS=Arabidopsis thaliana GN=EMB1417 PE=2 SV=1	GO:0009793//embryo development ending in seed dormancy	-	GO:0005739//mitochondrion
CL25232.Contig2_DB	1	11.4	9.03	7.67	9.36667	2.04	2.33	4.63	3	12.84	13.81	5.98	10.8767	Protein SRG1 OS=Arabidopsis thaliana GN=SRG1 PE=2 SV=1	GO:0055114//oxidation-reduction process	GO:0016706//oxidoreductase activity, acting on paired donors, with incorporation or reduction of molecular oxygen, 2-oxoglutarate as one donor, and incorporation of one atom each of oxygen into both donors	GO:0005737//cytoplasm
Unigene31085_DB	1	9.87	9.59	8.57	9.34333	0.75	1.71	2.35	1.60333	8.8	8.65	7.74	8.39667	--	-	-	-
Unigene17828_DB	1	10.78	5.96	11.28	9.34	1.6	0	2.57	1.39	14.21	12.86	4.2	10.4233	--	-	-	-
CL9499.Contig1_DB	1	10.15	4.22	13.61	9.32667	2.3	2.2	3.63	2.71	12.09	14.46	3.98	10.1767	Annexin D4 OS=Arabidopsis thaliana GN=ANN4 PE=2 SV=1	GO:1901700;GO:0006970//response to osmotic stress;GO:0009266//response to temperature stimulus	GO:0005544//calcium-dependent phospholipid binding;GO:0005509//calcium ion binding	-
Unigene747_DB	1	5.78	8.53	13.63	9.31333	3.11	1.48	2.98	2.52333	8.81	9.24	7.5	8.51667	Protein NSP-INTERACTING KINASE 3 OS=Arabidopsis thaliana GN=NIK3 PE=1 SV=1	GO:0006468//protein phosphorylation	GO:0004715//non-membrane spanning protein tyrosine kinase activity;GO:0005524//ATP binding;GO:0004674//protein serine/threonine kinase activity	GO:0005886//plasma membrane;GO:0016021//integral to membrane
CL12455.Contig2_DB	1	15.26	7.16	5.48	9.3	4.11	1.93	3.54	3.19333	12.88	24.28	8.86	15.34	Probable carboxylesterase 13 OS=Arabidopsis thaliana GN=CXE13 PE=2 SV=1	GO:0008152//metabolic process	GO:0016787//hydrolase activity	GO:0016023//cytoplasmic membrane-bounded vesicle
CL7328.Contig2_DB	1	7.73	15.08	4.98	9.26333	0	1.93	3.1	1.67667	9.03	10.46	7.43	8.97333	--	-	-	-
CL17960.Contig2_DB	1	14.07	4.72	8.95	9.24667	1.79	2.94	4.97	3.23333	15.76	10.02	6.57	10.7833	Vegetative cell wall protein gp1 OS=Chlamydomonas reinhardtii GN=GP1 PE=2 SV=1	-	-	-
CL15688.Contig1_DB	1	11.18	8.85	7.69	9.24	2.91	4.86	1.82	3.19667	9.27	10.16	11.01	10.1467	Pentatricopeptide repeat-containing protein At2g02980 OS=Arabidopsis thaliana GN=PCMP-H26 PE=2 SV=2	GO:0031425//chloroplast RNA processing;GO:0016556//mRNA modification	-	GO:0009507//chloroplast;GO:0005739//mitochondrion
CL17951.Contig1_DB	1	8.41	10.72	7.97	9.03333	6.41	3.89	4.02	4.77333	11.42	12.19	12.12	11.91	Glucan endo-1,3-beta-glucosidase 1 OS=Arabidopsis thaliana GN=At1g11820 PE=1 SV=3	GO:0005975//carbohydrate metabolic process	GO:0004553//hydrolase activity, hydrolyzing O-glycosyl compounds	GO:0016023//cytoplasmic membrane-bounded vesicle;GO:0005886//plasma membrane;GO:0005576//extracellular region
CL24764.Contig2_DB	1	7.87	7.69	11.44	9	4.52	5.17	3.04	4.24333	11.79	12.48	10.69	11.6533	Arginine/serine-rich protein 45 OS=Arabidopsis thaliana GN=SR45 PE=1 SV=1	-	-	-
CL2314.Contig1_DB	1	8.71	9.29	8.79	8.93	2.98	2.9	2.65	2.84333	6.94	7.68	15.75	10.1233	G-type lectin S-receptor-like serine/threonine-protein kinase At5g24080 OS=Arabidopsis thaliana GN=At5g24080 PE=2 SV=1	GO:0016310//phosphorylation	GO:0004672//protein kinase activity;GO:0000166//nucleotide binding	-
CL20373.Contig1_DB	1	11.09	6.75	8.6	8.81333	4.58	2.53	6.16	4.42333	12.9	15.48	6.37	11.5833	Transcription factor bHLH62 OS=Arabidopsis thaliana GN=BHLH62 PE=2 SV=1	-	GO:0046983//protein dimerization activity	GO:0005634//nucleus
CL3114.Contig2_DB	1	9.69	8.74	7.32	8.58333	1.31	2.38	4.17	2.62	8.96	8.41	5.1	7.49	ABSCISIC ACID-INSENSITIVE 5-like protein 2 OS=Arabidopsis thaliana GN=DPBF3 PE=1 SV=1	GO:0006355//regulation of transcription, DNA-dependent	GO:0003700//sequence-specific DNA binding transcription factor activity;GO:0043565//sequence-specific DNA binding	-
Unigene33925_DB	1	6.85	9.94	8.82	8.53667	4.4	2.01	3.68	3.36333	10.35	6.68	17.3	11.4433	Arginine/serine-rich protein 45 OS=Arabidopsis thaliana GN=SR45 PE=1 SV=1	GO:0009725//response to hormone stimulus;GO:0071310//cellular response to organic substance;GO:1901701;GO:0007165//signal transduction	-	-
CL4713.Contig3_DB	1	12.13	7.87	5.55	8.51667	1.94	2.39	2.75	2.36	8.99	7.82	5.69	7.5	Sugar transporter ERD6-like 6 OS=Arabidopsis thaliana GN=At1g75220 PE=1 SV=1	GO:0055085//transmembrane transport;GO:0008643//carbohydrate transport;GO:0055114//oxidation-reduction process	GO:0005351//sugar:hydrogen symporter activity;GO:0032440//2-alkenal reductase [NAD(P)] activity	GO:0005773//vacuole;GO:0005886//plasma membrane;GO:0016021//integral to membrane
CL3005.Contig2_DB	1	8.2	7.74	9.49	8.47667	3.95	1.4	3.71	3.02	12.68	17.72	9.26	13.22	C2 and GRAM domain-containing protein At1g03370 OS=Arabidopsis thaliana GN=At1g03370 PE=2 SV=4	-	-	GO:0009506//plasmodesma;GO:0009507//chloroplast
CL1751.Contig2_DB	1	10.08	6.28	9.01	8.45667	3.12	2.71	3.41	3.08	5.23	10.06	8.68	7.99	F-box protein At4g00755 OS=Arabidopsis thaliana GN=At4g00755 PE=2 SV=1	-	-	-
CL18370.Contig2_DB	1	7.46	9.5	8.02	8.32667	4.86	3.92	6.06	4.94667	10.84	9.24	11.72	10.6	Glycine-rich RNA-binding protein 3, mitochondrial OS=Arabidopsis thaliana GN=RBG3 PE=2 SV=1	GO:0010027//thylakoid membrane organization;GO:0019252//starch biosynthetic process;GO:0000023//maltose metabolic process	GO:0003723//RNA binding;GO:0000166//nucleotide binding	-
CL3251.Contig1_DB	1	5.68	4.92	14.2	8.26667	2.7	3.33	1.64	2.55667	16.1	4.88	5.56	8.84667	S-norcoclaurine synthase 1 OS=Coptis japonica GN=NCS1 PE=1 SV=1	GO:0055114//oxidation-reduction process	GO:0016706//oxidoreductase activity, acting on paired donors, with incorporation or reduction of molecular oxygen, 2-oxoglutarate as one donor, and incorporation of one atom each of oxygen into both donors	-
CL21348.Contig1_DB	1	10.73	7	7.03	8.25333	1.82	2.5	6.49	3.60333	14.2	11.54	8.66	11.4667	--	GO:0006499//N-terminal protein myristoylation;GO:0006346//methylation-dependent chromatin silencing;GO:0031048//chromatin silencing by small RNA;GO:0051567//histone H3-K9 methylation;GO:0016579//protein deubiquitination;GO:0048449//floral organ formation;GO:0010388//cullin deneddylation;GO:0009640//photomorphogenesis;GO:0008356//asymmetric cell division;GO:0006487//protein N-linked glycosylation;…	-	GO:0005886//plasma membrane;GO:0005634//nucleus
Unigene33042_DB	1	7.57	5.94	10.88	8.13	2.72	1.12	0.98	1.60667	15.03	12.83	6.71	11.5233	Cationic amino acid transporter 5 OS=Arabidopsis thaliana GN=CAT5 PE=1 SV=1	GO:0043091//L-arginine import;GO:0003333//amino acid transmembrane transport;GO:0015819//lysine transport;GO:0051938//L-glutamate import	GO:0015326//cationic amino acid transmembrane transporter activity;GO:0015189//L-lysine transmembrane transporter activity;GO:0015181//arginine transmembrane transporter activity;GO:0005313//L-glutamate transmembrane transporter activity	GO:0005886//plasma membrane;GO:0016021//integral to membrane
CL12358.Contig1_DB	1	10.6	5.93	7.77	8.1	3.26	2.56	3.9	3.24	8.65	10.12	5.41	8.06	Extensin OS=Nicotiana tabacum GN=HRGPNT3 PE=2 SV=1	-	-	GO:0044424//intracellular part
CL23597.Contig1_DB	1	12.26	0.43	11.24	7.97667	1.86	1.59	2.43	1.96	14.35	8.06	6.73	9.71333	3-ketoacyl-CoA synthase 12 OS=Arabidopsis thaliana GN=KCS12 PE=2 SV=1	GO:0006633//fatty acid biosynthetic process;GO:0009409//response to cold;GO:0009416//response to light stimulus	GO:0016747//transferase activity, transferring acyl groups other than amino-acyl groups	GO:0016023//cytoplasmic membrane-bounded vesicle;GO:0016020//membrane;GO:0005783//endoplasmic reticulum
Unigene821_DB	1	9.56	7.28	6.67	7.83667	2.31	3.23	3.94	3.16	10.55	6.01	7.67	8.07667	Proline-rich receptor-like protein kinase PERK2 OS=Arabidopsis thaliana GN=PERK2 PE=2 SV=3	GO:0016255//attachment of GPI anchor to protein	-	GO:0042765//GPI-anchor transamidase complex;GO:0005774//vacuolar membrane;GO:0005886//plasma membrane
CL4091.Contig1_DB	1	4.21	11.38	7.6	7.73	1.2	1.32	1.65	1.39	6.92	16.09	12.09	11.7	--	-	-	GO:0009570//chloroplast stroma
CL24047.Contig2_DB	1	8.91	5.21	9.04	7.72	4.47	1.64	5.03	3.71333	11.23	12.02	8.06	10.4367	Formin-like protein 6 OS=Oryza sativa subsp. japonica GN=FH6 PE=2 SV=2	-	-	GO:0016020//membrane
CL1689.Contig6_DB	1	3.93	8.02	10.6	7.51667	0	0	0	0	8.87	14.92	6.39	10.06	--	-	-	-
Unigene44114_DB	1	9.74	5.24	7.12	7.36667	0	0	0	0	11.88	9.42	8.87	10.0567	CASP-like protein Sb04g002820 OS=Sorghum bicolor GN=Sb04g002820 PE=3 SV=1	-	-	GO:0009536//plastid
CL3831.Contig2_DB	1	3.05	9.62	9.41	7.36	1.25	1.14	1.83	1.40667	9.15	12.65	11.39	11.0633	--	GO:0055114//oxidation-reduction process	GO:0050660//flavin adenine dinucleotide binding;GO:0008762//UDP-N-acetylmuramate dehydrogenase activity;GO:0003885//D-arabinono-1,4-lactone oxidase activity	GO:0016023//cytoplasmic membrane-bounded vesicle;GO:0005618//cell wall;GO:0016020//membrane
CL4000.Contig1_DB	1	9.63	7.31	5.1	7.34667	1.08	1.97	4.28	2.44333	4.63	14.11	7.14	8.62667	--	GO:0019318//hexose metabolic process	GO:0030246//carbohydrate binding;GO:0016853//isomerase activity	GO:0016023//cytoplasmic membrane-bounded vesicle
CL571.Contig2_DB	1	7.75	6.23	7.82	7.26667	4.4	3.52	5.06	4.32667	13.4	9.74	7.32	10.1533	Glucan endo-1,3-beta-glucosidase 7 OS=Arabidopsis thaliana GN=At4g34480 PE=1 SV=2	GO:0005975//carbohydrate metabolic process	GO:0004553//hydrolase activity, hydrolyzing O-glycosyl compounds;GO:0008409//5'-3' exonuclease activity;GO:0003677//DNA binding	GO:0005739//mitochondrion
CL10380.Contig2_DB	1	7.41	2.04	12.16	7.20333	1.51	1.49	2.31	1.77	9.19	18.13	1.97	9.76333	Arginine/serine-rich protein 45 OS=Arabidopsis thaliana GN=SR45 PE=1 SV=1	-	-	-
CL27731.Contig1_DB	1	7.41	6.23	7.85	7.16333	3.03	1.73	2.11	2.29	8.57	10.48	9.12	9.39	Pentatricopeptide repeat-containing protein At1g08070 OS=Arabidopsis thaliana GN=PCMP-H12 PE=2 SV=1	-	-	GO:0009536//plastid
CL12022.Contig1_DB	1	7.61	4.86	8.72	7.06333	4.05	3.74	1.31	3.03333	7.81	11.61	7.12	8.84667	Receptor-like protein kinase HERK 1 OS=Arabidopsis thaliana GN=HERK1 PE=1 SV=1	GO:0006468//protein phosphorylation;GO:0009741//response to brassinosteroid stimulus;GO:0050794//regulation of cellular process;GO:0009826//unidimensional cell growth	GO:0004674//protein serine/threonine kinase activity;GO:0005524//ATP binding	GO:0005739//mitochondrion;GO:0016023//cytoplasmic membrane-bounded vesicle
Unigene40708_DB	1	12.1	1.16	7.78	7.01333	2.54	1.24	2.46	2.08	15.52	7.7	5.99	9.73667	Probable polygalacturonase OS=Vitis vinifera GN=GSVIVT00026920001 PE=1 SV=1	GO:0005975//carbohydrate metabolic process	GO:0004650//polygalacturonase activity	GO:0005576//extracellular region;GO:0005618//cell wall
CL16066.Contig1_DB	1	6.55	8.45	5.56	6.85333	3.15	1.69	4.63	3.15667	10.49	9.88	10.51	10.2933	Formin-like protein 5 OS=Oryza sativa subsp. japonica GN=FH5 PE=2 SV=2	GO:0006508//proteolysis	GO:0004222//metalloendopeptidase activity	GO:0016020//membrane
CL19001.Contig1_DB	1	6.8	6.86	6.57	6.74333	1.78	2.03	3.71	2.50667	7.46	5.47	6.53	6.48667	Translocase of chloroplast 132, chloroplastic OS=Arabidopsis thaliana GN=TOC132 PE=1 SV=1	GO:0045036//protein targeting to chloroplast	GO:0005525//GTP binding;GO:0016817//hydrolase activity, acting on acid anhydrides	GO:0019031//viral envelope;GO:0016020//membrane
CL13802.Contig1_DB	1	7.11	5.83	7.2	6.71333	1.32	2.05	2.3	1.89	7.63	6.31	6.34	6.76	--	GO:0010584//pollen exine formation	-	GO:0005794//Golgi apparatus;GO:0005783//endoplasmic reticulum;GO:0005739//mitochondrion
Unigene16697_DB	1	1.83	11.53	6.56	6.64	1.44	3.29	3.77	2.83333	7.24	7.12	17.12	10.4933	--	-	-	-
CL22126.Contig1_DB	1	6.05	4.01	9.81	6.62333	0.93	1.81	1.34	1.36	9.14	5.29	5.79	6.74	--	-	-	-
Unigene30776_DB	1	6.48	7.46	5.15	6.36333	2.25	0.55	3.34	2.04667	10.08	7.76	5.79	7.87667	--	-	-	-
Unigene3909_DB	1	6.44	6.98	5.3	6.24	1.78	3.61	3.51	2.96667	6.81	10.17	10.21	9.06333	Mitochondrial carnitine/acylcarnitine carrier-like protein OS=Arabidopsis thaliana GN=BOU PE=1 SV=1	GO:0055085//transmembrane transport;GO:0006839//mitochondrial transport	-	GO:0005743//mitochondrial inner membrane;GO:0016021//integral to membrane
CL18847.Contig1_DB	1	7.43	2.13	9.03	6.19667	1.44	1.23	2.05	1.57333	9.25	7.62	3.51	6.79333	Pentatricopeptide repeat-containing protein At4g01030, mitochondrial OS=Arabidopsis thaliana GN=PCMP-H65 PE=3 SV=2	-	-	-
CL28381.Contig2_DB	1	6.83	6.17	5.58	6.19333	2.51	0.83	2.6	1.98	6.16	8.33	5.05	6.51333	Probable phosphatidylinositol 4-kinase type 2-beta At1g26270 OS=Arabidopsis thaliana GN=At1g26270 PE=1 SV=1	GO:0016310//phosphorylation	GO:0016301//kinase activity;GO:0016773//phosphotransferase activity, alcohol group as acceptor	GO:0009536//plastid
Unigene41348_DB	1	9.49	8.17	0	5.88667	4.05	1.12	1.62	2.26333	6.11	16.49	4.78	9.12667	Cytochrome P450 84A1 OS=Arabidopsis thaliana GN=CYP84A1 PE=2 SV=1	GO:0010224//response to UV-B;GO:0022900//electron transport chain	GO:0046424//ferulate 5-hydroxylase activity;GO:0009055//electron carrier activity;GO:0005506//iron ion binding;GO:0020037//heme binding;GO:0016705//oxidoreductase activity, acting on paired donors, with incorporation or reduction of molecular oxygen	GO:0016023//cytoplasmic membrane-bounded vesicle;GO:0005783//endoplasmic reticulum
CL13517.Contig1_DB	1	5.81	5.1	6.61	5.84	3.31	1.27	1.23	1.93667	10	5.9	6.7	7.53333	Callose synthase 3 OS=Arabidopsis thaliana GN=CALS3 PE=2 SV=3	-	-	-
CL9168.Contig1_DB	1	4.16	5.05	8.26	5.82333	3.26	2.95	2.01	2.74	8.21	8.03	10.5	8.91333	Leucine-rich repeat extensin-like protein 5 OS=Arabidopsis thaliana GN=LRX5 PE=2 SV=2	-	-	-
CL23663.Contig2_DB	1	2.41	8.99	5.38	5.59333	2.88	2.6	1.75	2.41	6.87	5.32	12.24	8.14333	Phosphoglucan phosphatase LSF2, chloroplastic OS=Arabidopsis thaliana GN=LSF2 PE=2 SV=1	GO:0006470//protein dephosphorylation;GO:0005983//starch catabolic process;GO:0000023//maltose metabolic process;GO:0019252//starch biosynthetic process;GO:0043085//positive regulation of catalytic activity	GO:0050308//sugar-phosphatase activity;GO:0008138//protein tyrosine/serine/threonine phosphatase activity;GO:2001070//starch binding	GO:0009507//chloroplast
CL27880.Contig1_DB	1	6.28	2.68	7.69	5.55	0	0.74	1.02	0.586667	12.3	5.81	6.07	8.06	Ureide permease 1 OS=Arabidopsis thaliana GN=UPS1 PE=1 SV=1	GO:0015720//allantoin transport;GO:0015857//uracil transport;GO:0042906//xanthine transport	GO:0042907//xanthine transmembrane transporter activity;GO:0005274//allantoin uptake transmembrane transporter activity;GO:0015505//uracil:cation symporter activity	GO:0016023//cytoplasmic membrane-bounded vesicle;GO:0005886//plasma membrane;GO:0009507//chloroplast
CL10322.Contig1_DB	1	4.69	6.64	5.09	5.47333	3.65	2.76	3.26	3.22333	6.62	7.39	7.61	7.20667	Filament-like plant protein 3 OS=Arabidopsis thaliana GN=FPP3 PE=2 SV=2	-	-	-
CL15090.Contig1_DB	1	4.79	4.32	5.38	4.83	0.84	0.95	4.35	2.04667	3.69	12.12	6.62	7.47667	NADP-dependent malic enzyme OS=Phaseolus vulgaris GN=ME1 PE=2 SV=1	GO:0006108//malate metabolic process;GO:0055114//oxidation-reduction process	GO:0051287//NAD binding;GO:0046872//metal ion binding;GO:0016619//malate dehydrogenase (oxaloacetate-decarboxylating) activity	-
CL20748.Contig1_DB	1	0.87	2.98	2.45	2.1	0	0	0	0	1.89	3.58	5.37	3.61333	Beta-amylase OS=Triticum aestivum GN=BMY1 PE=2 SV=1	GO:0000272//polysaccharide catabolic process	GO:0016160//amylase activity;GO:0046872//metal ion binding	GO:0009536//plastid;GO:0005739//mitochondrion
CL23043.Contig1_DB	2	1566.58	1892.92	1873.34	1777.61	377.56	335.75	461.35	391.553	945.04	795.71	683.98	808.243	Zinc finger protein CONSTANS-LIKE 6 OS=Arabidopsis thaliana GN=COL6 PE=2 SV=2	-	-	GO:0009536//plastid
CL12091.Contig2_DB	2	2260.33	1960.93	853.87	1691.71	382.73	387.03	789.17	519.643	817.96	1087.34	368.53	757.943	Auxin-repressed 12.5 kDa protein OS=Fragaria ananassa PE=2 SV=1	GO:0009749//response to glucose stimulus;GO:0009750//response to fructose stimulus;GO:0009744//response to sucrose stimulus	-	-
CL4344.Contig4_DB	2	990.89	1882.45	1301.38	1391.57	215.13	134.98	167.2	172.437	377.89	344.82	411.86	378.19	--	-	-	GO:0009536//plastid
CL13134.Contig1_DB	2	697.21	1148.08	912.47	919.253	206.31	169.36	229.43	201.7	527.97	500.25	415.12	481.113	Root phototropism protein 2 OS=Arabidopsis thaliana GN=RPT2 PE=1 SV=2	-	-	GO:0009506//plasmodesma
CL11837.Contig1_DB	2	463.5	1296.23	800.98	853.57	143.92	141.9	212.2	166.007	530.03	571.68	899.43	667.047	Probable apyrase 3 OS=Oryza sativa subsp. japonica GN=APY3 PE=2 SV=2	-	GO:0016787//hydrolase activity;GO:0005524//ATP binding	GO:0016023//cytoplasmic membrane-bounded vesicle;GO:0005576//extracellular region
CL10708.Contig2_DB	2	592.68	865.79	572.82	677.097	113.25	252.73	299.62	221.867	239.21	398.15	338.1	325.153	Alpha-galactosidase OS=Oryza sativa subsp. japonica GN=Os10g0493600 PE=1 SV=1	GO:0009965//leaf morphogenesis;GO:0009911//positive regulation of flower development;GO:0032940//secretion by cell;GO:0016139//glycoside catabolic process;GO:0046477//glycosylceramide catabolic process;GO:0009311//oligosaccharide metabolic process	GO:0052692//raffinose alpha-galactosidase activity	GO:0009505//plant-type cell wall;GO:0016023//cytoplasmic membrane-bounded vesicle
Unigene45169_DB	2	715.6	699.26	310.83	575.23	150.93	208.66	240.09	199.893	293.73	366.07	235.62	298.473	--	-	-	-
CL28918.Contig2_DB	2	519.5	641.87	482.94	548.103	122.21	110.16	186.02	139.463	376.72	332.32	365.83	358.29	Formin-like protein 20 OS=Arabidopsis thaliana GN=FH20 PE=2 SV=3	-	-	-
CL6275.Contig2_DB	2	494.13	594.35	473.94	520.807	83.11	68.49	82.63	78.0767	180.48	218.13	120.48	173.03	Probable transcription factor GLK1 OS=Oryza sativa subsp. japonica GN=GLK1 PE=2 SV=1	-	GO:0003677//DNA binding;GO:0003682//chromatin binding	-
CL20242.Contig1_DB	2	441.12	480.92	569.48	497.173	60.57	37.55	31.78	43.3	256.86	371.79	229.64	286.097	--	-	-	-
CL2602.Contig1_DB	2	514.78	478.4	496.41	496.53	131.44	130.58	201.43	154.483	328.59	269.13	212.48	270.067	Arginine/serine-rich protein 45 OS=Arabidopsis thaliana GN=SR45 PE=1 SV=1	-	GO:0080030//methyl indole-3-acetate esterase activity;GO:0080032//methyl jasmonate esterase activity;GO:0080031//methyl salicylate esterase activity;GO:0004091//carboxylesterase activity;GO:0050253//retinyl-palmitate esterase activity	GO:0009536//plastid
Unigene36417_DB	2	286.75	766.86	425.59	493.067	43.22	34.11	54.52	43.95	152.15	106.94	128.66	129.25	--	-	-	GO:0009536//plastid
CL10587.Contig1_DB	2	378.07	591.28	442.12	470.49	162.92	116.43	129.88	136.41	142.5	234.39	159.73	178.873	Formin-like protein 16 OS=Oryza sativa subsp. japonica GN=FH16 PE=2 SV=1	-	-	GO:0005739//mitochondrion
Unigene4451_DB	2	497.55	482.44	197.97	392.653	64.92	99.37	140.63	101.64	141.42	162.08	114.1	139.2	--	-	-	-
CL10587.Contig2_DB	2	295.67	544.98	335.05	391.9	90.29	107.73	122.17	106.73	149.28	183.21	119.89	150.793	Formin-like protein 16 OS=Oryza sativa subsp. japonica GN=FH16 PE=2 SV=1	-	-	GO:0005739//mitochondrion
CL19410.Contig1_DB	2	388.26	286.23	382.41	352.3	55.42	55.04	90.05	66.8367	124.44	156.55	174.8	151.93	Probable xyloglucan endotransglucosylase/hydrolase protein 28 OS=Arabidopsis thaliana GN=XTH28 PE=2 SV=1	GO:0006073//cellular glucan metabolic process	GO:0004553//hydrolase activity, hydrolyzing O-glycosyl compounds;GO:0016762//xyloglucan:xyloglucosyl transferase activity	GO:0016023//cytoplasmic membrane-bounded vesicle;GO:0005618//cell wall;GO:0048046//apoplast
CL27768.Contig1_DB	2	429.08	413.02	209.6	350.567	54.79	60.32	91.17	68.76	76.11	92.18	139.86	102.717	--	-	-	-
CL3473.Contig1_DB	2	315.9	395.49	340.29	350.56	89.91	78.89	79	82.6	165.53	181.9	165.41	170.947	Protein LHY OS=Arabidopsis thaliana GN=LHY PE=1 SV=2	-	GO:0005488//binding	-
CL7955.Contig2_DB	2	323.82	190.18	467.55	327.183	45.72	91.78	96.35	77.95	147.33	198.84	70.33	138.833	Polyamine oxidase OS=Zea mays GN=PAO PE=1 SV=1	GO:0055114//oxidation-reduction process	GO:0052893;GO:0052900;GO:0050660//flavin adenine dinucleotide binding;GO:0046592//polyamine oxidase activity;GO:0052896;GO:0052897;GO:0052898	GO:0016023//cytoplasmic membrane-bounded vesicle
CL6404.Contig4_DB	2	270.72	349.87	344.01	321.533	55.9	55.1	71.14	60.7133	242.77	309.11	194.94	248.94	Early nodulin-like protein 2 OS=Arabidopsis thaliana GN=At4g27520 PE=1 SV=1	-	-	GO:0005739//mitochondrion;GO:0009507//chloroplast
CL3822.Contig1_DB	2	322.09	0	590.75	304.28	28.59	6.18	27.18	20.65	136.43	143.23	87.45	122.37	--	-	-	-
Unigene40477_DB	2	326.2	268.12	237.23	277.183	64.59	46.69	91.43	67.57	238.72	201.64	107.33	182.563	Bowman-Birk type trypsin inhibitor OS=Triticum aestivum PE=1 SV=1	-	GO:0030414//peptidase inhibitor activity	GO:0016023//cytoplasmic membrane-bounded vesicle
CL5770.Contig1_DB	2	219.86	338.39	259.63	272.627	73.84	76.97	94.33	81.7133	127.56	122.67	119.63	123.287	Probable clathrin assembly protein At4g32285 OS=Arabidopsis thaliana GN=At4g32285 PE=1 SV=2	GO:0048268//clathrin coat assembly	GO:0005545//1-phosphatidylinositol binding;GO:0016491//oxidoreductase activity;GO:0030276//clathrin binding	GO:0005886//plasma membrane;GO:0030118//clathrin coat;GO:0005634//nucleus;GO:0005829//cytosol
CL4344.Contig3_DB	2	156.21	481.18	177.85	271.747	15.96	23.32	47.93	29.07	73.07	49.97	71.07	64.7033	--	-	-	GO:0009536//plastid
CL5106.Contig3_DB	2	217.27	324.14	251.49	264.3	46.86	44.13	41.91	44.3	188.5	156.13	122.23	155.62	Lichenase-2 (Fragment) OS=Hordeum vulgare PE=1 SV=1	GO:0005975//carbohydrate metabolic process;GO:0009409//response to cold;GO:0009617//response to bacterium;GO:0009817//defense response to fungus, incompatible interaction;GO:0009651//response to salt stress	GO:0042972	GO:0005773//vacuole;GO:0016023//cytoplasmic membrane-bounded vesicle;GO:0005886//plasma membrane;GO:0005618//cell wall;GO:0048046//apoplast
CL4530.Contig1_DB	2	192.12	335.36	236.5	254.66	31.24	22.66	28.15	27.35	155.29	119.13	132.97	135.797	Phosphatidylinositol 4-phosphate 5-kinase 1 OS=Arabidopsis thaliana GN=PIP5K1 PE=1 SV=1	GO:0016310//phosphorylation	GO:0016301//kinase activity	GO:0005739//mitochondrion
CL9090.Contig3_DB	2	224.83	272.47	248.3	248.533	77.24	65.47	78	73.57	144.88	134.7	117.65	132.41	Two-component response regulator ARR2 OS=Arabidopsis thaliana GN=ARR2 PE=1 SV=1	-	GO:0005488//binding	-
CL7100.Contig1_DB	2	204.93	288.25	217.49	236.89	76.23	78.14	91.7	82.0233	83.78	115.45	109.02	102.75	Vegetative cell wall protein gp1 OS=Chlamydomonas reinhardtii GN=GP1 PE=2 SV=1	-	-	-
CL14802.Contig3_DB	2	213.1	302.88	192.25	236.077	75.34	61.67	128.43	88.48	126.77	176.84	208.19	170.6	Spermine synthase OS=Arabidopsis thaliana GN=SPMS PE=1 SV=1	GO:0006596//polyamine biosynthetic process	GO:0004766//spermidine synthase activity;GO:0016768//spermine synthase activity	-
CL24543.Contig1_DB	2	162.58	230.98	197.15	196.903	46.05	49.82	56.5	50.79	115.52	162.97	176.88	151.79	ATP synthase delta chain, chloroplastic OS=Pisum sativum GN=ATPD PE=1 SV=1	GO:0044763;GO:0071704;GO:0051707//response to other organism;GO:0044238//primary metabolic process;GO:0006952//defense response	GO:0016798//hydrolase activity, acting on glycosyl bonds	-
Unigene30296_DB	2	251.39	228.76	86.22	188.79	21.88	34.1	52.75	36.2433	42.19	75.86	48.47	55.5067	--	-	-	-
CL21666.Contig1_DB	2	182.7	197.87	182.35	187.64	74.77	44.09	92.62	70.4933	115.6	124.67	92.49	110.92	Ocs element-binding factor 1 OS=Zea mays GN=OBF1 PE=2 SV=2	GO:0006355//regulation of transcription, DNA-dependent	GO:0003700//sequence-specific DNA binding transcription factor activity;GO:0043565//sequence-specific DNA binding	GO:0009536//plastid
CL9313.Contig1_DB	2	218.38	235.25	92.66	182.097	11.87	51.59	36.66	33.3733	88.72	216.83	75.88	127.143	Arginine/serine-rich protein 45 OS=Arabidopsis thaliana GN=SR45 PE=1 SV=1	-	-	GO:0009536//plastid
Unigene32601_DB	2	269.89	188.92	81.32	180.043	30.89	39.77	65.87	45.51	65.93	88.13	65.83	73.2967	Sulfated surface glycoprotein 185 OS=Volvox carteri PE=1 SV=1	-	-	-
CL19822.Contig1_DB	2	142.41	274.18	110.06	175.55	21.29	14.8	24.93	20.34	53.33	87.77	57.25	66.1167	--	-	-	-
Unigene3980_DB	2	166.9	172.6	160.69	166.73	69.82	47.87	67.65	61.78	100.83	114.64	74.44	96.6367	Pleckstrin homology domain-containing protein 1 OS=Arabidopsis thaliana GN=PH1 PE=2 SV=2	-	GO:0005543//phospholipid binding	GO:0005737//cytoplasm
CL13977.Contig2_DB	2	138.4	203.22	137.7	159.773	29.38	42.59	34.56	35.51	75.05	61.79	28.99	55.2767	NAC domain-containing protein 21/22 OS=Arabidopsis thaliana GN=NAC021 PE=1 SV=2	-	-	-
CL7449.Contig1_DB	2	125.95	187.15	143.55	152.217	9.14	13.76	22.9	15.2667	66.44	102.45	81.59	83.4933	Vegetative cell wall protein gp1 OS=Chlamydomonas reinhardtii GN=GP1 PE=2 SV=1	-	-	-
CL14556.Contig1_DB	2	163.36	156.83	131.22	150.47	38.57	25.74	39.49	34.6	91.79	104.9	54.77	83.82	Homeobox-leucine zipper protein HOX4 OS=Oryza sativa subsp. japonica GN=HOX4 PE=1 SV=1	GO:0006355//regulation of transcription, DNA-dependent	GO:0003700//sequence-specific DNA binding transcription factor activity;GO:0000976//transcription regulatory region sequence-specific DNA binding	GO:0005634//nucleus
CL12965.Contig2_DB	2	232.48	154.01	63.62	150.037	23.51	30.59	34.42	29.5067	22.58	69.32	34.44	42.1133	Probable CCR4-associated factor 1 homolog 7 OS=Arabidopsis thaliana GN=CAF1-7 PE=2 SV=2	-	GO:0003676//nucleic acid binding	GO:0005634//nucleus
CL10910.Contig4_DB	2	142.8	134.96	168.97	148.91	44.22	49.7	54.68	49.5333	73.77	67.57	74.95	72.0967	ABC transporter B family member 21 OS=Arabidopsis thaliana GN=ABCB21 PE=1 SV=2	GO:0009630//gravitropism;GO:0048767//root hair elongation;GO:0010540//basipetal auxin transport;GO:0010315//auxin efflux;GO:0055085//transmembrane transport;GO:0006200//ATP catabolic process;GO:0009735//response to cytokinin stimulus	GO:0008559//xenobiotic-transporting ATPase activity;GO:0005524//ATP binding	GO:0016021//integral to membrane;GO:0005886//plasma membrane
CL4697.Contig1_DB	2	143.87	202.14	94.94	146.983	29.87	22.7	25.87	26.1467	66.13	55.09	83.52	68.2467	--	-	-	-
CL29393.Contig1_DB	2	131.74	156.41	102.16	130.103	47.67	28.78	42.56	39.67	69.15	59.02	42.1	56.7567	F-box protein At3g07870 OS=Arabidopsis thaliana GN=At3g07870 PE=2 SV=1	-	-	-
CL19822.Contig2_DB	2	108.53	203.42	75.95	129.3	17.44	14.04	24.69	18.7233	41.48	70.72	34.38	48.86	--	-	-	-
CL13195.Contig1_DB	2	89.33	182.75	112.43	128.17	23.35	19.68	29.34	24.1233	90.61	78.94	57.17	75.5733	Arginine/serine-rich protein 45 OS=Arabidopsis thaliana GN=SR45 PE=1 SV=1	-	-	-
CL12745.Contig1_DB	2	102.49	176.31	101.4	126.733	34.51	36.46	45.42	38.7967	44.19	64.48	58.52	55.73	Formin-like protein 5 OS=Oryza sativa subsp. japonica GN=FH5 PE=2 SV=2	-	-	-
CL584.Contig2_DB	2	106.38	129.57	142.16	126.037	30.13	21.78	55.62	35.8433	85.49	81.6	94.7	87.2633	Proline-rich receptor-like protein kinase PERK2 OS=Arabidopsis thaliana GN=PERK2 PE=2 SV=3	GO:0042538//hyperosmotic salinity response	-	GO:0009941//chloroplast envelope
CL2760.Contig2_DB	2	151.3	188.4	37.03	125.577	27.5	31.52	38.78	32.6	31.71	45.03	51.64	42.7933	Ethylene-responsive transcription factor 4 OS=Arabidopsis thaliana GN=ERF4 PE=1 SV=1	GO:0006355//regulation of transcription, DNA-dependent	GO:0003700//sequence-specific DNA binding transcription factor activity;GO:0003677//DNA binding	GO:0005634//nucleus
CL22351.Contig1_DB	2	116.6	130.91	127.07	124.86	10.88	2.43	26.83	13.38	72.53	49.46	67.96	63.3167	Formin-like protein 5 OS=Oryza sativa subsp. japonica GN=FH5 PE=2 SV=2	-	-	-
CL2871.Contig2_DB	2	117.09	184.23	49.01	116.777	15.24	21.75	49.16	28.7167	72.03	73.69	61.81	69.1767	Formin-like protein 18 OS=Oryza sativa subsp. japonica GN=FH18 PE=2 SV=1	-	-	-
CL24579.Contig3_DB	2	140.97	136.9	69.66	115.843	24.29	32.44	57.31	38.0133	78.46	88.24	54.75	73.8167	--	-	-	-
CL9249.Contig1_DB	2	78.97	112.86	151.71	114.513	32.85	52.64	25.5	36.9967	64.36	75.63	113.58	84.5233	Vegetative cell wall protein gp1 OS=Chlamydomonas reinhardtii GN=GP1 PE=2 SV=1	-	-	GO:0005739//mitochondrion
CL798.Contig1_DB	2	78.61	166.81	95.6	113.673	21.1	27.33	43.51	30.6467	63.32	69.9	75.48	69.5667	Delta(7)-sterol-C5(6)-desaturase OS=Nicotiana tabacum PE=2 SV=1	GO:0006633//fatty acid biosynthetic process;GO:0016126//sterol biosynthetic process;GO:0055114//oxidation-reduction process	GO:0005506//iron ion binding;GO:0050046//lathosterol oxidase activity;GO:0000248//C-5 sterol desaturase activity	GO:0016021//integral to membrane
CL7636.Contig2_DB	2	120.87	142.6	75.21	112.893	30.52	32.02	62.57	41.7033	51.83	83.37	64.78	66.66	--	-	-	-
Unigene33990_DB	2	53.81	135.78	124.38	104.657	6.22	4.37	12.68	7.75667	29.81	39.74	39.54	36.3633	--	-	-	-
CL4463.Contig1_DB	2	82.2	137.62	90.36	103.393	20.93	18.43	23.55	20.97	52.94	89.41	68.07	70.14	Ribulose bisphosphate carboxylase/oxygenase activase B, chloroplastic OS=Hordeum vulgare GN=RCAB PE=2 SV=1	-	GO:0005524//ATP binding	GO:0009570//chloroplast stroma
CL12245.Contig1_DB	2	138.53	41.04	127.04	102.203	3.41	17.6	19.18	13.3967	29.42	74.27	42.42	48.7033	Caricain OS=Carica papaya PE=1 SV=2	-	-	-
CL7388.Contig1_DB	2	66.59	157.61	79.95	101.383	18.53	20.51	32.55	23.8633	44.26	59.17	44.79	49.4067	--	-	-	-
CL2595.Contig2_DB	2	89.52	136.15	67.14	97.6033	19.7	25.82	31.03	25.5167	44.78	50.88	34.72	43.46	--	-	-	-
Unigene24787_DB	2	133.87	117.46	41.2	97.51	16.85	24.29	34.07	25.07	29.9	53.58	29.12	37.5333	--	-	-	-
CL24037.Contig4_DB	2	91.99	110.13	88.99	97.0367	32.55	29.74	25.5	29.2633	38.55	57.15	44.46	46.72	Leucine-rich repeat extensin-like protein 5 OS=Arabidopsis thaliana GN=LRX5 PE=2 SV=2	-	-	-
CL360.Contig1_DB	2	107.06	107.15	76.54	96.9167	18.82	33.07	43.31	31.7333	44.14	63.96	22.62	43.5733	Ethylene-responsive transcription factor RAP2-10 OS=Arabidopsis thaliana GN=RAP2-10 PE=2 SV=1	GO:0006355//regulation of transcription, DNA-dependent	GO:0003700//sequence-specific DNA binding transcription factor activity;GO:0003677//DNA binding	GO:0005634//nucleus
CL22421.Contig1_DB	2	77.18	144.32	67.48	96.3267	4.83	18.07	37.37	20.09	6.07	69.25	62.61	45.9767	Ananain OS=Ananas comosus GN=AN1 PE=1 SV=2	-	GO:0003824//catalytic activity	-
CL9595.Contig1_DB	2	78.59	129.27	80.86	96.24	10.98	3.7	10.26	8.31333	33.34	59.86	40.92	44.7067	Zinc finger protein CONSTANS-LIKE 16 OS=Arabidopsis thaliana GN=COL16 PE=2 SV=2	-	-	-
CL5527.Contig1_DB	2	174.79	54.49	47.6	92.2933	7.76	13.84	33.62	18.4067	15.28	54.02	10.16	26.4867	--	-	GO:0008270//zinc ion binding	GO:0005739//mitochondrion
CL6048.Contig2_DB	2	35.6	165.96	75.19	92.25	19.4	18.25	16.46	18.0367	42.55	53.27	67.27	54.3633	NADP-dependent alkenal double bond reductase P2 OS=Arabidopsis thaliana GN=P2 PE=2 SV=2	GO:0055114//oxidation-reduction process	GO:0016491//oxidoreductase activity;GO:0000166//nucleotide binding;GO:0008270//zinc ion binding	-
CL498.Contig2_DB	2	73.56	110.78	91.03	91.79	24.37	39.45	38.12	33.98	51.54	71.33	63.48	62.1167	Vegetative cell wall protein gp1 OS=Chlamydomonas reinhardtii GN=GP1 PE=2 SV=1	-	-	GO:0016020//membrane
Unigene31965_DB	2	35.84	149.72	88.13	91.23	4.14	4.78	3.14	4.02	41.13	25.98	44.43	37.18	--	-	-	-
CL4031.Contig2_DB	2	99.55	109.76	61.03	90.1133	19.52	10.92	20.94	17.1267	57.51	49.44	22.15	43.0333	Ethylene-responsive transcription factor 1 OS=Oryza sativa subsp. japonica GN=EREBP1 PE=1 SV=1	-	-	-
CL13833.Contig1_DB	2	103.96	139.06	26.78	89.9333	12.64	8.27	1.89	7.6	45.05	36.17	47.52	42.9133	Probable calcium-binding protein CML30 OS=Arabidopsis thaliana GN=CML30 PE=2 SV=1	-	GO:0005509//calcium ion binding	GO:0009536//plastid
CL24037.Contig2_DB	2	70.97	119.37	75.32	88.5533	23.24	18.73	27.84	23.27	48.1	60.09	63.23	57.14	Leucine-rich repeat extensin-like protein 5 OS=Arabidopsis thaliana GN=LRX5 PE=2 SV=2	-	-	-
CL9772.Contig7_DB	2	64.36	121.22	79.57	88.3833	20.93	25.8	27.13	24.62	50.52	51.36	66.02	55.9667	Organic cation/carnitine transporter 4 OS=Arabidopsis thaliana GN=OCT4 PE=2 SV=1	GO:0055085//transmembrane transport	GO:0022857//transmembrane transporter activity	GO:0016021//integral to membrane
Unigene1264_DB	2	86.05	98.81	80.25	88.37	14.89	9.37	15.44	13.2333	52.69	72	34.64	53.11	Vegetative cell wall protein gp1 OS=Chlamydomonas reinhardtii GN=GP1 PE=2 SV=1	-	GO:0008375//acetylglucosaminyltransferase activity	GO:0016020//membrane;GO:0016023//cytoplasmic membrane-bounded vesicle
Unigene31006_DB	2	95.36	86.95	76.34	86.2167	23.3	28.51	43.44	31.75	59.85	67.37	32.5	53.24	--	-	-	-
CL13951.Contig1_DB	2	80.28	101.72	68.84	83.6133	10.12	4.39	12.95	9.15333	34.15	42.16	31.75	36.02	Zinc finger protein CONSTANS-LIKE 16 OS=Arabidopsis thaliana GN=COL16 PE=2 SV=2	-	-	-
CL5040.Contig1_DB	2	95.46	114.72	37.02	82.4	14.91	21.37	37.61	24.63	57.67	51.51	35.95	48.3767	Arginine/serine-rich protein 45 OS=Arabidopsis thaliana GN=SR45 PE=1 SV=1	-	-	-
CL7567.Contig1_DB	2	56.94	119.19	67.18	81.1033	24.92	27.57	37.84	30.11	38.79	36.34	43.81	39.6467	Probable carboxylesterase 13 OS=Arabidopsis thaliana GN=CXE13 PE=2 SV=1	GO:0008152//metabolic process	GO:0016787//hydrolase activity	GO:0009536//plastid
CL18458.Contig3_DB	2	89.21	98.05	51.21	79.49	12.91	15.59	24.53	17.6767	29.52	42.81	41.41	37.9133	Pollen-specific leucine-rich repeat extensin-like protein 3 OS=Arabidopsis thaliana GN=PEX3 PE=2 SV=1	-	-	-
Unigene430_DB	2	73.36	107.24	56.71	79.1033	22.52	23.99	42.86	29.79	53.09	65.77	58.82	59.2267	--	-	-	-
Unigene32090_DB	2	106.92	94.71	34.21	78.6133	17.08	15.39	19.28	17.25	23.45	38.86	20.51	27.6067	--	-	-	-
CL28114.Contig2_DB	2	89.47	98.31	43.69	77.1567	14.97	20.08	16.8	17.2833	13.98	20.75	43	25.91	Proline-rich receptor-like protein kinase PERK2 OS=Arabidopsis thaliana GN=PERK2 PE=2 SV=3	GO:0008152//metabolic process	GO:0016846//carbon-sulfur lyase activity	-
CL20321.Contig1_DB	2	86.6	56.4	87.46	76.82	16.78	20.25	21.04	19.3567	25.4	41.5	25.63	30.8433	Basic 7S globulin 2 OS=Glycine max PE=1 SV=1	GO:0044238//primary metabolic process;GO:0043170	-	-
CL29455.Contig1_DB	2	90.58	102.18	36.29	76.35	20.82	28.04	25.33	24.73	23.92	102.28	18.27	48.1567	--	-	-	-
Unigene37740_DB	2	60.04	92.49	71.17	74.5667	8.53	2.92	19.31	10.2533	6.51	24.78	30.09	20.46	--	-	-	-
CL28909.Contig1_DB	2	67.19	95.42	60.91	74.5067	17.8	13	20.94	17.2467	51.67	45.78	47.81	48.42	Probable carboxylesterase 15 OS=Arabidopsis thaliana GN=CXE15 PE=2 SV=1	GO:0008152//metabolic process	GO:0016787//hydrolase activity	-
Unigene34884_DB	2	107.91	80.27	33.26	73.8133	15.81	21.88	30.44	22.71	31.37	49.69	41.39	40.8167	Proline-rich receptor-like protein kinase PERK9 OS=Arabidopsis thaliana GN=PERK9 PE=2 SV=1	-	-	-
CL3491.Contig1_DB	2	61.21	80.38	78.15	73.2467	20.24	23.63	33.07	25.6467	42.01	35.19	41.28	39.4933	E3 ubiquitin-protein ligase RMA1H1 OS=Capsicum annuum GN=RMA1H1 PE=1 SV=1	-	GO:0008270//zinc ion binding	-
CL20216.Contig2_DB	2	88.03	73.33	55.96	72.44	11.86	6.83	10.97	9.88667	36.22	39.88	23.15	33.0833	--	GO:0009734//auxin mediated signaling pathway	GO:0005516//calmodulin binding	GO:0005739//mitochondrion
CL5005.Contig1_DB	2	37.14	106.52	69.78	71.1467	7.02	7.24	8.92	7.72667	23.39	16.62	33.47	24.4933	Probable LRR receptor-like serine/threonine-protein kinase At3g47570 OS=Arabidopsis thaliana GN=At3g47570 PE=1 SV=1	-	GO:0016772//transferase activity, transferring phosphorus-containing groups	GO:0016023//cytoplasmic membrane-bounded vesicle;GO:0005739//mitochondrion
CL8219.Contig8_DB	2	89.05	70	50.48	69.8433	13.54	8.86	13.04	11.8133	18.49	8.46	40.76	22.57	Zeaxanthin epoxidase, chloroplastic OS=Arabidopsis thaliana GN=ZEP PE=1 SV=1	GO:0055114//oxidation-reduction process	GO:0016491//oxidoreductase activity	-
CL7482.Contig2_DB	2	66.45	84.49	58.23	69.7233	8.77	12.98	17.42	13.0567	42.11	46.41	34.81	41.11	Peroxisomal membrane protein PEX14 OS=Arabidopsis thaliana GN=PEX14 PE=1 SV=2	GO:0016558//protein import into peroxisome matrix;GO:0045892//negative regulation of transcription, DNA-dependent	GO:0003714//transcription corepressor activity	GO:0005778//peroxisomal membrane
CL13330.Contig1_DB	2	76.84	74.37	56.04	69.0833	17.59	11.75	17.83	15.7233	38.56	51.67	38.4	42.8767	Leucine-rich repeat extensin-like protein 5 OS=Arabidopsis thaliana GN=LRX5 PE=2 SV=2	GO:0006355//regulation of transcription, DNA-dependent	-	GO:0016021//integral to membrane
Unigene36649_DB	2	66.01	64.53	74.63	68.39	17.69	12.88	18.54	16.37	42.95	30.6	39.63	37.7267	Calcium-binding protein KIC OS=Arabidopsis thaliana GN=KIC PE=1 SV=2	GO:0042744//hydrogen peroxide catabolic process;GO:0010091//trichome branching	GO:0005515//protein binding;GO:0005509//calcium ion binding	GO:0005634//nucleus
CL29262.Contig4_DB	2	43.87	105.34	54.57	67.9267	18.33	21.66	24.94	21.6433	23.97	39.34	40.68	34.6633	Patellin-4 OS=Arabidopsis thaliana GN=PATL4 PE=1 SV=2	-	-	-
Unigene3130_DB	2	65.45	93.97	43.24	67.5533	14.62	13.98	28.54	19.0467	23.77	49.46	30.13	34.4533	--	-	-	-
CL277.Contig2_DB	2	64.63	79.3	53.05	65.66	18.11	24.06	31.9	24.69	28.57	26.47	34.07	29.7033	Formin-like protein 5 OS=Oryza sativa subsp. japonica GN=FH5 PE=2 SV=2	-	-	-
Unigene38418_DB	2	67.34	66.81	60.15	64.7667	18.81	23.46	28.01	23.4267	51.35	29.98	28.98	36.77	--	-	GO:0047372//acylglycerol lipase activity	-
Unigene45269_DB	2	29.69	113.6	44.54	62.61	7.86	16.49	18.96	14.4367	23.67	21.65	32.85	26.0567	Retrovirus-related Pol polyprotein from transposon TNT 1-94 OS=Nicotiana tabacum PE=2 SV=1	-	-	-
Unigene1195_DB	2	37.19	122.11	28.4	62.5667	2.03	7.73	3.47	4.41	60.71	28.13	27.22	38.6867	Ethylene-responsive transcription factor 3 OS=Arabidopsis thaliana GN=ERF3 PE=1 SV=1	-	-	-
CL2960.Contig1_DB	2	71.55	62.55	52.25	62.1167	9.95	2.46	25.8	12.7367	23.44	30.69	14.08	22.7367	F-box/LRR-repeat MAX2 homolog OS=Oryza sativa subsp. japonica GN=D3 PE=2 SV=2	GO:0009414//response to water deprivation;GO:0009934//regulation of meristem structural organization;GO:0009926//auxin polar transport;GO:0010016//shoot system morphogenesis;GO:0007568//aging;GO:0009416//response to light stimulus	-	GO:0005634//nucleus;GO:0000151//ubiquitin ligase complex
CL11968.Contig1_DB	2	47.75	90.3	47.82	61.9567	14.95	12.36	18.73	15.3467	20.06	51.14	49.06	40.0867	F-box/LRR-repeat protein At3g48880 OS=Arabidopsis thaliana GN=At3g48880 PE=2 SV=1	-	-	-
Unigene26026_DB	2	82.84	76.22	26.63	61.8967	8.6	12.89	13.33	11.6067	22.91	28.53	13.07	21.5033	Arginine/serine-rich protein 45 OS=Arabidopsis thaliana GN=SR45 PE=1 SV=1	-	-	-
CL8746.Contig1_DB	2	48.43	80.53	54.61	61.19	20.05	17.96	23.2	20.4033	19.88	33.79	27.92	27.1967	Protein argonaute 14 OS=Oryza sativa subsp. japonica GN=AGO14 PE=2 SV=1	-	-	-
CL20736.Contig5_DB	2	79.44	68.11	33.21	60.2533	10.07	13.91	22.94	15.64	19.25	27.89	13.67	20.27	--	-	-	-
CL14524.Contig1_DB	2	54.19	68.2	57.1	59.83	19.36	18.6	27.39	21.7833	30.77	33.51	30.26	31.5133	Nuclear transcription factor Y subunit A-7 OS=Arabidopsis thaliana GN=NFYA7 PE=2 SV=1	GO:0006355//regulation of transcription, DNA-dependent	GO:0003677//DNA binding;GO:0003700//sequence-specific DNA binding transcription factor activity	GO:0016602//CCAAT-binding factor complex
CL12267.Contig1_DB	2	50.46	64.11	62.82	59.13	18.62	15.7	22.25	18.8567	30.87	37.56	32.75	33.7267	Auxin-repressed 12.5 kDa protein OS=Fragaria ananassa PE=2 SV=1	-	-	-
Unigene28999_DB	2	58.84	73.63	39.79	57.42	9.68	12.13	25.5	15.77	21.65	25.81	29.25	25.57	Arginine/serine-rich protein 45 OS=Arabidopsis thaliana GN=SR45 PE=1 SV=1	-	GO:0016740//transferase activity	GO:0005739//mitochondrion
CL10344.Contig2_DB	2	57.42	47.56	66.2	57.06	16.64	13.31	21.81	17.2533	31.27	47.48	23.22	33.99	Cadmium-induced protein AS8 OS=Arabidopsis thaliana GN=At4g19070 PE=2 SV=1	-	-	GO:0009536//plastid
CL19696.Contig1_DB	2	57.39	66.86	46.88	57.0433	13	19.22	20.42	17.5467	19.28	20.56	25.12	21.6533	Vegetative cell wall protein gp1 OS=Chlamydomonas reinhardtii GN=GP1 PE=2 SV=1	-	-	-
Unigene1578_DB	2	53.91	55.09	61.69	56.8967	5.27	12.4	29.56	15.7433	45.38	40.48	49.91	45.2567	ATP synthase subunit alpha, chloroplastic OS=Lolium perenne GN=atpA PE=3 SV=1	GO:0015991//ATP hydrolysis coupled proton transport;GO:0042742//defense response to bacterium;GO:0005975//carbohydrate metabolic process;GO:0042777//plasma membrane ATP synthesis coupled proton transport;GO:0009409//response to cold;GO:0006979//response to oxidative stress	GO:0046961//proton-transporting ATPase activity, rotational mechanism;GO:0008270//zinc ion binding;GO:0004575//sucrose alpha-glucosidase activity;GO:0046933//hydrogen ion transporting ATP synthase activity, rotational mechanism;GO:0050897//cobalt ion binding;GO:0008266//poly(U) RNA binding;GO:0005507//copper ion binding;GO:0005524//ATP binding	GO:0009941//chloroplast envelope;GO:0010319//stromule;GO:0005773//vacuole;GO:0031977//thylakoid lumen;GO:0005743//mitochondrial inner membrane;GO:0005618//cell wall;GO:0005730//nucleolus;GO:0045261//proton-transporting ATP synthase complex, catalytic core F(1);GO:0009535//chloroplast thylakoid membrane;GO:0010287//plastoglobule;GO:0005886//plasma membrane
CL4652.Contig1_DB	2	40.88	80.49	47.77	56.38	18.22	6.19	9.76	11.39	46.25	33.55	47.82	42.54	Chloride channel protein CLC-a OS=Arabidopsis thaliana GN=CLC-A PE=1 SV=2	GO:0055085//transmembrane transport;GO:0015706//nitrate transport;GO:0006821//chloride transport;GO:0010167//response to nitrate	GO:0005247//voltage-gated chloride channel activity;GO:0009671//nitrate:hydrogen symporter activity	GO:0016021//integral to membrane;GO:0009705//plant-type vacuole membrane
CL11904.Contig1_DB	2	53.44	50.95	64.56	56.3167	19.38	17.58	18.51	18.49	36.91	38.22	22.69	32.6067	Probable inactive receptor-like protein kinase At3g56050 OS=Arabidopsis thaliana GN=At3g56050 PE=2 SV=1	GO:0016310//phosphorylation	GO:0016301//kinase activity	-
Unigene1748_DB	2	50.79	71.06	46.13	55.9933	11.58	5.64	12.96	10.06	37.04	32.29	28.02	32.45	--	-	-	-
CL22099.Contig1_DB	2	38.44	93.05	35.01	55.5	7.61	9.94	22.53	13.36	15.38	30.33	25.35	23.6867	Formin-like protein 18 OS=Oryza sativa subsp. japonica GN=FH18 PE=2 SV=1	-	-	-
Unigene4965_DB	2	48.05	67.54	50.13	55.24	10.77	6.86	12.42	10.0167	49.69	42.89	36.52	43.0333	Protein IQ-DOMAIN 14 OS=Arabidopsis thaliana GN=IQD14 PE=1 SV=1	-	GO:0046872//metal ion binding	GO:0016023//cytoplasmic membrane-bounded vesicle
CL8798.Contig3_DB	2	47.75	69.3	48.36	55.1367	8.2	9.65	19.79	12.5467	16.44	16.22	31.49	21.3833	WAT1-related protein At4g28040 OS=Arabidopsis thaliana GN=At4g28040 PE=2 SV=1	-	-	GO:0016020//membrane
CL1059.Contig15_DB	2	60.3	74.02	28.5	54.2733	14.74	12.88	23.11	16.91	26.97	44.06	49.21	40.08	--	-	-	-
CL16686.Contig1_DB	2	50.87	87.67	21.54	53.36	2.49	5.05	2.35	3.29667	24.07	19.91	27.65	23.8767	Probable calcium-binding protein CML45 OS=Arabidopsis thaliana GN=CML45 PE=1 SV=1	-	-	-
CL1017.Contig1_DB	2	44.61	65.97	47.11	52.5633	7.11	3.43	8.26	6.26667	30.69	41.99	24.07	32.25	RING-H2 finger protein ATL79 OS=Arabidopsis thaliana GN=ATL79 PE=2 SV=1	-	GO:0008270//zinc ion binding	-
Unigene32560_DB	2	60.78	52.02	43.26	52.02	6.3	7.32	11.97	8.53	13.32	28.79	24.96	22.3567	CASP-like protein Os02g0134500 OS=Oryza sativa subsp. japonica GN=Os02g0134500 PE=2 SV=2	-	-	-
CL7074.Contig2_DB	2	57.73	46.99	51.23	51.9833	15.12	15.01	20.34	16.8233	22.95	24.48	24.35	23.9267	Protein-tyrosine-phosphatase MKP1 OS=Arabidopsis thaliana GN=MKP1 PE=1 SV=1	GO:0035335//peptidyl-tyrosine dephosphorylation;GO:0010225//response to UV-C;GO:0010224//response to UV-B;GO:0044763;GO:0048856//anatomical structure development;GO:0034645//cellular macromolecule biosynthetic process;GO:0009651//response to salt stress;GO:0044765;GO:0009791//post-embryonic development;GO:0016310//phosphorylation	GO:0017017//MAP kinase tyrosine/serine/threonine phosphatase activity;GO:0004725//protein tyrosine phosphatase activity;GO:0016301//kinase activity	GO:0005829//cytosol
CL12271.Contig2_DB	2	49.4	67.14	39.18	51.9067	2.09	1.7	5.53	3.10667	15.71	22.83	28.3	22.28	Ethylene-responsive transcription factor 2 OS=Nicotiana tabacum GN=ERF2 PE=2 SV=1	GO:0009620//response to fungus;GO:0006355//regulation of transcription, DNA-dependent	GO:0003700//sequence-specific DNA binding transcription factor activity	GO:0005634//nucleus
Unigene3010_DB	2	42.16	63.93	49.56	51.8833	16.5	7.29	8.97	10.92	32.89	41.8	24.04	32.91	--	-	-	-
CL8038.Contig3_DB	2	76.39	52.19	25.91	51.4967	4.35	10.49	8.61	7.81667	41.04	28.06	27.4	32.1667	Lachrymatory-factor synthase OS=Allium cepa GN=LFS PE=1 SV=1	-	-	-
CL21003.Contig1_DB	2	33.37	56.06	64.6	51.3433	19.09	16.09	17.96	17.7133	35.77	42.77	34.38	37.64	Lycopene epsilon cyclase, chloroplastic OS=Arabidopsis thaliana GN=LUT2 PE=1 SV=2	GO:0016123//xanthophyll biosynthetic process;GO:0016120//carotene biosynthetic process	GO:0045435//lycopene epsilon cyclase activity;GO:0016705//oxidoreductase activity, acting on paired donors, with incorporation or reduction of molecular oxygen	GO:0009536//plastid
Unigene1882_DB	2	30.89	77.08	45.98	51.3167	15.32	15.08	18.67	16.3567	27.28	37.4	33.75	32.81	--	-	-	-
CL16453.Contig1_DB	2	41.3	66.91	44.87	51.0267	14.99	8.29	13.79	12.3567	20.05	28.59	33.65	27.43	--	-	-	-
CL14752.Contig1_DB	2	58.76	45.97	48.17	50.9667	4.68	7.31	9.19	7.06	46.79	43.54	17.03	35.7867	Leucine-rich repeat extensin-like protein 5 OS=Arabidopsis thaliana GN=LRX5 PE=2 SV=2	GO:0009826//unidimensional cell growth;GO:0009734//auxin mediated signaling pathway;GO:0008152//metabolic process;GO:0009640//photomorphogenesis;GO:0009723//response to ethylene stimulus	GO:0008080//N-acetyltransferase activity	-
CL22349.Contig1_DB	2	51.57	67.1	33.48	50.7167	11.19	7.63	23.15	13.99	16.68	25.04	22.04	21.2533	Protein CHUP1, chloroplastic OS=Arabidopsis thaliana GN=CHUP1 PE=1 SV=1	GO:0016311//dephosphorylation	GO:0016791//phosphatase activity	-
Unigene25960_DB	2	20.68	73.43	57.05	50.3867	3.81	11.32	2.89	6.00667	13.09	34.24	24.99	24.1067	Probable LRR receptor-like serine/threonine-protein kinase At3g47570 OS=Arabidopsis thaliana GN=At3g47570 PE=1 SV=1	-	GO:0004672//protein kinase activity;GO:0000166//nucleotide binding	GO:0016023//cytoplasmic membrane-bounded vesicle;GO:0005739//mitochondrion
CL8114.Contig1_DB	2	43.34	67.19	40.62	50.3833	11.81	11.5	12.07	11.7933	27.23	20.43	26.67	24.7767	Uncharacterized protein At5g19025 OS=Arabidopsis thaliana GN=At5g19025 PE=2 SV=3	GO:0006412//translation	GO:0003735//structural constituent of ribosome	GO:0005840//ribosome;GO:0016023//cytoplasmic membrane-bounded vesicle
CL17847.Contig3_DB	2	39.72	76.81	34.47	50.3333	9.61	14.52	23.04	15.7233	16.12	28.99	17.62	20.91	--	-	-	-
CL18531.Contig1_DB	2	49.84	61.85	37.66	49.7833	13.18	9.5	9.49	10.7233	21.84	31.77	17.57	23.7267	Mitogen-activated protein kinase kinase 5 OS=Arabidopsis thaliana GN=MKK5 PE=1 SV=2	GO:0006468//protein phosphorylation	GO:0005524//ATP binding;GO:0004674//protein serine/threonine kinase activity	GO:0005739//mitochondrion
CL25582.Contig1_DB	2	54.35	54.69	38.75	49.2633	10.62	16.18	29.43	18.7433	21.7	22.08	26.05	23.2767	DEAD-box ATP-dependent RNA helicase 42 OS=Arabidopsis thaliana GN=RH42 PE=1 SV=2	-	-	-
CL7449.Contig5_DB	2	35.6	62.46	48.77	48.9433	6.87	0	9.49	5.45333	24.49	33.74	16.13	24.7867	Vegetative cell wall protein gp1 OS=Chlamydomonas reinhardtii GN=GP1 PE=2 SV=1	-	-	-
CL12687.Contig1_DB	2	59.32	53.26	32.97	48.5167	13.9	14.34	18.71	15.65	20.18	28.56	17.12	21.9533	--	-	-	-
CL6735.Contig2_DB	2	49.84	51.57	43.92	48.4433	9.75	16.55	25.7	17.3333	29.32	34.29	26.7	30.1033	Zinc finger CCCH domain-containing protein 53 OS=Oryza sativa subsp. japonica GN=Os07g0682400 PE=2 SV=1	-	GO:0008270//zinc ion binding;GO:0003677//DNA binding;GO:0000166//nucleotide binding;GO:0003723//RNA binding	-
CL1412.Contig2_DB	2	51.95	58.63	34.58	48.3867	7.45	15.03	22.94	15.14	23.3	18.93	23	21.7433	Chaperone protein dnaJ 20, chloroplastic OS=Arabidopsis thaliana GN=ATJ20 PE=2 SV=2	-	-	GO:0009536//plastid
CL4055.Contig3_DB	2	66.58	40.47	38.09	48.38	4.81	17.88	10.45	11.0467	14.06	16.92	15.17	15.3833	U1 small nuclear ribonucleoprotein 70 kDa OS=Arabidopsis thaliana GN=RNU1 PE=1 SV=1	-	GO:1901363;GO:0097159//organic cyclic compound binding	GO:0044424//intracellular part
CL6046.Contig1_DB	2	57.47	45.04	42.21	48.24	3.17	8.25	8.02	6.48	25.33	36.23	10.98	24.18	E3 ubiquitin-protein ligase EL5 OS=Oryza sativa subsp. japonica GN=EL5.1 PE=1 SV=1	-	GO:0008270//zinc ion binding	GO:0016023//cytoplasmic membrane-bounded vesicle
CL7430.Contig1_DB	2	72.5	56.28	13.84	47.54	12.67	6.94	6.61	8.74	26.96	17.34	35.21	26.5033	RING-H2 finger protein ATL3 OS=Arabidopsis thaliana GN=ATL3 PE=2 SV=1	-	GO:0008270//zinc ion binding	-
CL23091.Contig1_DB	2	48.54	44.48	49.43	47.4833	13.19	14.72	26.28	18.0633	19.68	29.69	19.4	22.9233	Protein VERNALIZATION INSENSITIVE 3 OS=Arabidopsis thaliana GN=VIN3 PE=2 SV=2	-	-	-
Unigene34877_DB	2	53.21	31.97	57.01	47.3967	5.3	9.55	7.56	7.47	12.41	39.46	14.13	22	--	-	-	-
CL19232.Contig2_DB	2	64.82	42.67	34.33	47.2733	5.22	7.84	7.67	6.91	25.06	27.9	17.14	23.3667	Two-component response regulator ARR4 OS=Arabidopsis thaliana GN=ARR4 PE=1 SV=1	GO:0007165//signal transduction	-	-
CL2155.Contig2_DB	2	70.81	29.81	40.76	47.1267	13.45	15.08	18.34	15.6233	33.95	41.76	10.72	28.81	Transcription factor TRY OS=Arabidopsis thaliana GN=TRY PE=1 SV=1	GO:2000039//regulation of trichome morphogenesis;GO:0006355//regulation of transcription, DNA-dependent;GO:0009651//response to salt stress;GO:0048629//trichome patterning;GO:0009753//response to jasmonic acid stimulus;GO:0001708//cell fate specification;GO:0009751//response to salicylic acid stimulus;GO:0048765//root hair cell differentiation;GO:0010228//vegetative to reproductive phase transiti…	GO:0003677//DNA binding;GO:0003700//sequence-specific DNA binding transcription factor activity;GO:0003682//chromatin binding	GO:0005634//nucleus
Unigene31417_DB	2	55.85	54.55	30.52	46.9733	19.56	12.31	17.33	16.4	32.39	38.45	19.09	29.9767	--	-	-	-
Unigene18640_DB	2	33.75	71.18	34.9	46.61	4.32	1.72	4.79	3.61	18.48	10.33	7.73	12.18	--	-	-	-
CL7586.Contig1_DB	2	45.18	46.45	46.4	46.01	16.2	15.78	19.21	17.0633	20.42	20.37	21.43	20.74	C-type lectin receptor-like tyrosine-protein kinase At1g52310 OS=Arabidopsis thaliana GN=At1g52310 PE=2 SV=1	GO:0006346//methylation-dependent chromatin silencing;GO:0010048//vernalization response;GO:0007267//cell-cell signaling;GO:0010050//vegetative phase change;GO:0009855//determination of bilateral symmetry;GO:0010051//xylem and phloem pattern formation;GO:0006468//protein phosphorylation;GO:0009887//organ morphogenesis;GO:0010014//meristem initiation;GO:0035196//production of miRNAs involved in ge…	GO:0030246//carbohydrate binding;GO:0004713//protein tyrosine kinase activity;GO:0005524//ATP binding	GO:0016023//cytoplasmic membrane-bounded vesicle;GO:0005886//plasma membrane
CL21632.Contig1_DB	2	67.41	41.07	28.83	45.77	7.92	15.4	19.89	14.4033	40.04	44.4	15.98	33.4733	--	-	-	-
Unigene42233_DB	2	49.47	49.89	37.91	45.7567	13.62	3.76	11.75	9.71	16.44	35.71	25.79	25.98	Cell number regulator 13 OS=Zea mays GN=CNR13 PE=2 SV=1	-	-	-
CL15542.Contig1_DB	2	39.69	60.73	36.66	45.6933	8.18	11.83	25.48	15.1633	19.24	37.56	23.27	26.69	--	-	-	-
CL28957.Contig1_DB	2	54.42	46.51	35.98	45.6367	7.17	5.29	9.03	7.16333	25.6	39.8	15.68	27.0267	Probable galacturonosyltransferase-like 3 OS=Arabidopsis thaliana GN=GATL3 PE=2 SV=1	-	GO:0016757//transferase activity, transferring glycosyl groups	-
Unigene32350_DB	2	69.02	40.34	26.49	45.2833	7.91	8.56	13.92	10.13	23.51	21.33	17.6	20.8133	--	-	-	-
CL23392.Contig3_DB	2	36.29	71.27	28.09	45.2167	14.94	10.32	7.2	10.82	17.78	20.93	10.7	16.47	Protein IQ-DOMAIN 14 OS=Arabidopsis thaliana GN=IQD14 PE=1 SV=1	-	-	-
Unigene11381_DB	2	29.13	79.09	26.03	44.75	10.27	11.77	10.4	10.8133	17.57	21.48	40.69	26.58	Formin-like protein 5 OS=Oryza sativa subsp. japonica GN=FH5 PE=2 SV=2	-	-	-
CL25976.Contig3_DB	2	31.86	51.55	49.69	44.3667	11.02	12.02	10.15	11.0633	18.84	17.93	22.46	19.7433	Probable NADPH:quinone oxidoreductase 1 OS=Oryza sativa subsp. japonica GN=Os01g0953600 PE=2 SV=1	GO:0042742//defense response to bacterium;GO:0009651//response to salt stress;GO:0055114//oxidation-reduction process	GO:0003955//NAD(P)H dehydrogenase (quinone) activity	GO:0005886//plasma membrane;GO:0009570//chloroplast stroma
CL4071.Contig1_DB	2	36.48	50.84	44.5	43.94	7.92	2.81	3.6	4.77667	14.64	17.91	3.59	12.0467	Acidic leucine-rich nuclear phosphoprotein 32-related protein 1 OS=Oryza sativa subsp. japonica GN=Os07g0607800 PE=2 SV=1	-	-	-
CL338.Contig1_DB	2	29.72	59.84	42.22	43.9267	1.32	0.86	1.57	1.25	13.99	13.96	11.67	13.2067	--	-	-	-
Unigene28125_DB	2	19.97	71.89	38.73	43.53	9.23	11.83	15.74	12.2667	27.23	20.45	49.15	32.2767	--	-	-	-
CL96.Contig1_DB	2	40.57	46.69	41.93	43.0633	4.62	2.06	4.18	3.62	12.11	21.41	12.42	15.3133	Sulfated surface glycoprotein 185 OS=Volvox carteri PE=1 SV=1	-	-	-
CL14752.Contig3_DB	2	53.75	12.86	62.36	42.99	6.62	8.29	0	4.97	29.62	27.79	25.29	27.5667	--	GO:0009826//unidimensional cell growth;GO:0009734//auxin mediated signaling pathway;GO:0008152//metabolic process;GO:0009640//photomorphogenesis;GO:0009723//response to ethylene stimulus	GO:0008080//N-acetyltransferase activity	-
CL7636.Contig3_DB	2	46.99	52.45	29.25	42.8967	9.77	17.81	13.8	13.7933	29.05	28.24	22	26.43	--	-	-	-
CL2511.Contig3_DB	2	53.02	41.12	34.12	42.7533	17.64	5.21	11.97	11.6067	23.24	30.48	37.84	30.52	Transcription factor bHLH47 OS=Arabidopsis thaliana GN=BHLH47 PE=2 SV=1	-	GO:0005488//binding	GO:0005634//nucleus
CL22020.Contig2_DB	2	31.82	61.1	34.81	42.5767	3.83	4.64	12.01	6.82667	16.69	26.96	30.85	24.8333	Cyclin-dependent kinase inhibitor 4 OS=Oryza sativa subsp. japonica GN=KRP4 PE=2 SV=2	GO:0007050//cell cycle arrest;GO:0006469//negative regulation of protein kinase activity	GO:0004861//cyclin-dependent protein serine/threonine kinase inhibitor activity	GO:0005634//nucleus
CL256.Contig1_DB	2	46.2	43.31	37.93	42.48	6.69	2.28	6.73	5.23333	10.55	12.11	6.21	9.62333	Zinc finger protein CONSTANS-LIKE 16 OS=Arabidopsis thaliana GN=COL16 PE=2 SV=2	-	-	-
CL28449.Contig1_DB	2	36.52	45.39	45.16	42.3567	5.54	11.51	18.16	11.7367	16.18	23.19	18.75	19.3733	--	-	-	-
CL20528.Contig1_DB	2	19.68	89.42	17.72	42.2733	9.94	5.63	2.83	6.13333	16.8	12.09	18.04	15.6433	Ethylene-responsive transcription factor ERF105 OS=Arabidopsis thaliana GN=ERF105 PE=2 SV=1	GO:0006351//transcription, DNA-dependent	-	GO:0043231//intracellular membrane-bounded organelle
CL17283.Contig1_DB	2	31.66	24.08	70.23	41.99	5.52	3.05	4.85	4.47333	17.59	15.34	48.35	27.0933	Uroporphyrinogen-III C-methyltransferase OS=Cyanidium caldarium GN=cobA PE=3 SV=1	GO:0019354//siroheme biosynthetic process;GO:0055114//oxidation-reduction process;GO:0032259//methylation;GO:0006567//threonine catabolic process	GO:0043115//precorrin-2 dehydrogenase activity;GO:0004851//uroporphyrin-III C-methyltransferase activity	GO:0009507//chloroplast
Unigene45244_DB	2	31.62	59.57	33.74	41.6433	7.35	5.5	11.98	8.27667	11.27	18.85	7.35	12.49	Pistil-specific extensin-like protein OS=Nicotiana tabacum PE=2 SV=1	-	-	-
CL3965.Contig1_DB	2	40.1	57.77	26.16	41.3433	9.1	6.91	21.28	12.43	14.22	28.32	20.65	21.0633	--	-	-	-
CL18304.Contig1_DB	2	53.33	33.93	36.46	41.24	7.08	10.1	18.34	11.84	18.17	25.35	15.77	19.7633	Eukaryotic translation initiation factor isoform 4G-1 OS=Arabidopsis thaliana GN=EIF(ISO)4G1 PE=1 SV=1	GO:0006413//translational initiation;GO:0016070//RNA metabolic process;GO:0009744//response to sucrose stimulus;GO:0009750//response to fructose stimulus;GO:0009734//auxin mediated signaling pathway	GO:0003743//translation initiation factor activity	GO:0005634//nucleus
CL13172.Contig2_DB	2	29.6	51.38	42.33	41.1033	8.22	12.92	17.27	12.8033	31.17	6.23	35.08	24.16	Bifunctional monodehydroascorbate reductase and carbonic anhydrase nectarin-3 OS=Nicotiana langsdorffii x Nicotiana sanderae GN=NEC3 PE=1 SV=1	GO:0006730//one-carbon metabolic process	GO:0008270//zinc ion binding;GO:0004089//carbonate dehydratase activity	GO:0016023//cytoplasmic membrane-bounded vesicle
Unigene32255_DB	2	58.43	48.81	15.52	40.92	10.28	5.92	11.96	9.38667	26.63	47.12	11.77	28.5067	--	-	-	-
CL23089.Contig2_DB	2	32	53.3	37.28	40.86	9.24	5.82	11.16	8.74	10.7	10.1	15.82	12.2067	--	-	-	-
CL18220.Contig1_DB	2	42.35	53.73	26.24	40.7733	15.8	13.62	9.67	13.03	18.39	27.45	18.81	21.55	F-box protein PP2-B10 OS=Arabidopsis thaliana GN=PP2B10 PE=1 SV=1	-	-	-
CL17081.Contig1_DB	2	48.08	42.25	31.45	40.5933	5.67	5.68	4.27	5.20667	8.77	29.18	11.84	16.5967	--	-	-	-
CL24911.Contig2_DB	2	38.2	47.98	35.55	40.5767	10.55	11.67	18.28	13.5	20.28	26.18	18.96	21.8067	Vegetative cell wall protein gp1 OS=Chlamydomonas reinhardtii GN=GP1 PE=2 SV=1	-	GO:0016787//hydrolase activity	GO:0016023//cytoplasmic membrane-bounded vesicle
CL13786.Contig1_DB	2	48.4	35.68	37.32	40.4667	5.62	12.54	9.13	9.09667	16.95	25.08	5.56	15.8633	Formin-like protein 16 OS=Oryza sativa subsp. japonica GN=FH16 PE=2 SV=1	-	-	-
CL25238.Contig2_DB	2	33.12	50.25	37.89	40.42	13.23	12.31	12.86	12.8	27.2	31.36	30.98	29.8467	Trans-splicing factor Raa3, chloroplastic OS=Chlamydomonas reinhardtii GN=RAA3 PE=1 SV=1	-	-	GO:0009536//plastid
CL1893.Contig2_DB	2	31.25	50.96	38.91	40.3733	12.16	12	19.75	14.6367	38.1	23.56	25.54	29.0667	Potassium channel AKT2 OS=Oryza sativa subsp. japonica GN=Os05g0428700 PE=2 SV=1	GO:0042391//regulation of membrane potential;GO:0055085//transmembrane transport;GO:0009737//response to abscisic acid stimulus;GO:0006813//potassium ion transport	GO:0005249//voltage-gated potassium channel activity	GO:0016021//integral to membrane
CL1946.Contig1_DB	2	31.7	47.59	41.78	40.3567	18.41	12.54	12.72	14.5567	29.77	36.63	33.07	33.1567	Protein ARABIDILLO 1 OS=Arabidopsis thaliana GN=FBX5 PE=1 SV=1	-	-	-
CL9942.Contig1_DB	2	54.44	39.75	26.84	40.3433	8.88	9.03	10.33	9.41333	20.71	27.37	14.29	20.79	--	-	-	-
CL10247.Contig2_DB	2	38.85	50.64	31.46	40.3167	14.91	9.62	18.57	14.3667	20.97	27.12	14.21	20.7667	Protein argonaute 12 OS=Oryza sativa subsp. japonica GN=AGO12 PE=2 SV=2	GO:0006950//response to stress	-	-
CL1124.Contig2_DB	2	40.34	50.78	29.57	40.23	10.72	12.69	18.74	14.05	22.96	21.97	17.4	20.7767	--	-	-	-
CL4081.Contig1_DB	2	44.67	37.52	38.12	40.1033	8.54	9.75	13.24	10.51	19.41	19.08	11.39	16.6267	Vegetative cell wall protein gp1 OS=Chlamydomonas reinhardtii GN=GP1 PE=2 SV=1	-	-	-
CL18314.Contig1_DB	2	47.4	48.08	24.44	39.9733	4.38	4.67	9.16	6.07	18.01	21.1	11.78	16.9633	E3 ubiquitin-protein ligase EL5 OS=Oryza sativa subsp. japonica GN=EL5.1 PE=1 SV=1	-	-	-
CL2991.Contig2_DB	2	30.72	59.57	28.33	39.54	5.73	6.57	6.02	6.10667	16.85	21.6	22.57	20.34	--	-	-	-
CL10528.Contig1_DB	2	42.17	50.82	25.42	39.47	10.78	10.17	18.78	13.2433	21.05	26.38	21.44	22.9567	Vegetative cell wall protein gp1 OS=Chlamydomonas reinhardtii GN=GP1 PE=2 SV=1	-	-	-
CL6107.Contig2_DB	2	33.62	43.96	40.31	39.2967	14.25	7.75	13.13	11.71	20.4	17.52	24.11	20.6767	--	-	-	-
CL2084.Contig1_DB	2	49.63	38.7	29.54	39.29	10.97	7.77	12.08	10.2733	28.9	22.57	40.05	30.5067	NAC domain-containing protein 68 OS=Oryza sativa subsp. japonica GN=NAC68 PE=2 SV=1	-	-	-
CL29392.Contig3_DB	2	38.51	45.21	33.41	39.0433	9.65	11.65	17.42	12.9067	23.77	30.58	31.73	28.6933	Disease resistance protein RGA2 OS=Solanum bulbocastanum GN=RGA2 PE=1 SV=1	-	-	-
Unigene33797_DB	2	52.23	32.1	32.47	38.9333	7.33	11.81	9.53	9.55667	17.9	13.66	12.38	14.6467	Dehydration-responsive element-binding protein 2A OS=Oryza sativa subsp. indica GN=DREB2A PE=3 SV=2	GO:0006355//regulation of transcription, DNA-dependent	GO:0003700//sequence-specific DNA binding transcription factor activity;GO:0003677//DNA binding	GO:0005634//nucleus
CL24424.Contig1_DB	2	43.37	39.53	33.68	38.86	8.46	10.37	17.36	12.0633	12.04	24.26	12.12	16.14	--	-	-	-
CL12271.Contig1_DB	2	43.25	53.08	19.63	38.6533	10.13	8.48	1	6.53667	11.1	15.4	12.25	12.9167	Ethylene-responsive transcription factor 2 OS=Nicotiana tabacum GN=ERF2 PE=2 SV=1	GO:0009620//response to fungus;GO:0006355//regulation of transcription, DNA-dependent	GO:0003700//sequence-specific DNA binding transcription factor activity	GO:0005634//nucleus
CL12036.Contig4_DB	2	64.56	37.43	13.76	38.5833	3.47	12.16	9.24	8.29	11.11	10.8	23.09	15	--	-	-	-
CL3302.Contig2_DB	2	11.49	68.39	34.72	38.2	9.7	13.31	13.21	12.0733	19.54	24.02	34.13	25.8967	Uncharacterized protein At5g01610 OS=Arabidopsis thaliana GN=At5g01610 PE=1 SV=1	-	-	-
CL25552.Contig2_DB	2	36.2	43.48	33.47	37.7167	11.82	2.01	7.84	7.22333	17.13	31.78	23.2	24.0367	Leucine-rich repeat receptor-like protein kinase PXL2 OS=Arabidopsis thaliana GN=PXL2 PE=2 SV=1	GO:0006468//protein phosphorylation	GO:0004674//protein serine/threonine kinase activity;GO:0005524//ATP binding	GO:0016023//cytoplasmic membrane-bounded vesicle;GO:0016020//membrane
Unigene3269_DB	2	40.75	39.43	32.95	37.71	13.72	11.59	14.07	13.1267	21.95	29.55	28.72	26.74	Formin-like protein 7 OS=Oryza sativa subsp. japonica GN=FH7 PE=2 SV=2	-	-	-
Unigene35439_DB	2	17.65	52.7	42.42	37.59	4.94	10.62	16.14	10.5667	28.43	7.8	23.28	19.8367	Probable LRR receptor-like serine/threonine-protein kinase At3g47570 OS=Arabidopsis thaliana GN=At3g47570 PE=1 SV=1	-	GO:0016772//transferase activity, transferring phosphorus-containing groups	GO:0016023//cytoplasmic membrane-bounded vesicle;GO:0005739//mitochondrion
Unigene18884_DB	2	12.7	62.51	37.21	37.4733	6.49	4.51	6.22	5.74	10.68	16.88	10.86	12.8067	17.6 kDa class I heat shock protein OS=Helianthus annuus GN=HSP17.6 PE=2 SV=1	GO:0006950//response to stress	-	-
CL17467.Contig4_DB	2	34.59	42.5	35.15	37.4133	5.81	12.01	15.7	11.1733	12.42	20.56	11.65	14.8767	--	-	-	-
CL9618.Contig4_DB	2	38.4	44.57	29.15	37.3733	12.33	10.12	12.8	11.75	13.52	19.69	15.52	16.2433	Zinc finger CCCH domain-containing protein 16 OS=Oryza sativa subsp. japonica GN=Os02g0557500 PE=2 SV=2	GO:0006725//cellular aromatic compound metabolic process	GO:0016787//hydrolase activity	-
Unigene3062_DB	2	26.78	30.4	53.98	37.0533	10.55	6.03	9.75	8.77667	24.23	18.75	30.18	24.3867	Probable receptor-like protein kinase At1g11050 OS=Arabidopsis thaliana GN=At1g11050 PE=2 SV=1	GO:0006468//protein phosphorylation	GO:0004713//protein tyrosine kinase activity;GO:0005524//ATP binding;GO:0004674//protein serine/threonine kinase activity	GO:0016023//cytoplasmic membrane-bounded vesicle
CL18727.Contig1_DB	2	33.87	45.29	31.43	36.8633	9.31	10.34	8.28	9.31	27.19	37.54	23.24	29.3233	Proline-rich receptor-like protein kinase PERK2 OS=Arabidopsis thaliana GN=PERK2 PE=2 SV=3	-	-	-
CL6320.Contig1_DB	2	32.38	34.77	43.1	36.75	10.38	9.83	12.96	11.0567	27.83	28.16	24.81	26.9333	Serine/threonine-protein kinase KIPK OS=Arabidopsis thaliana GN=KIPK PE=1 SV=1	GO:0006468//protein phosphorylation	GO:0005524//ATP binding;GO:0004674//protein serine/threonine kinase activity	-
CL6554.Contig2_DB	2	31.37	51.39	27.47	36.7433	9.29	8.36	14.61	10.7533	13.38	22.56	23.37	19.77	Formin-like protein 14 OS=Arabidopsis thaliana GN=FH14 PE=3 SV=3	-	-	-
CL7418.Contig4_DB	2	36.95	47.31	25.24	36.5	5.45	7.78	19.48	10.9033	28.31	20.45	24.01	24.2567	Probable adenylate kinase 1, chloroplastic OS=Arabidopsis thaliana GN=At2g37250 PE=2 SV=1	GO:0046939//nucleotide phosphorylation;GO:0048364//root development;GO:0048367//shoot system development;GO:0008652//cellular amino acid biosynthetic process	GO:0004017//adenylate kinase activity;GO:0005524//ATP binding	GO:0005739//mitochondrion;GO:0009570//chloroplast stroma;GO:0005634//nucleus
CL5005.Contig16_DB	2	22.17	50.71	36.48	36.4533	0.43	2.99	5.03	2.81667	17.54	17.7	37.44	24.2267	Probable LRR receptor-like serine/threonine-protein kinase At3g47570 OS=Arabidopsis thaliana GN=At3g47570 PE=1 SV=1	GO:0006468//protein phosphorylation	GO:0004672//protein kinase activity;GO:0005524//ATP binding	GO:0016023//cytoplasmic membrane-bounded vesicle
CL22223.Contig2_DB	2	41.54	39.73	28.04	36.4367	7.65	8.78	11.33	9.25333	21.31	33.5	30.41	28.4067	Vegetative cell wall protein gp1 OS=Chlamydomonas reinhardtii GN=GP1 PE=2 SV=1	-	GO:0051082//unfolded protein binding;GO:0031072//heat shock protein binding	-
Unigene34653_DB	2	31.83	49.7	27.09	36.2067	3.79	0	6.81	3.53333	9.61	18.15	13.29	13.6833	Proline-rich receptor-like protein kinase PERK2 OS=Arabidopsis thaliana GN=PERK2 PE=2 SV=3	-	-	-
Unigene41743_DB	2	32.86	40.41	35.16	36.1433	9.08	7.39	14.71	10.3933	10.8	16.51	19.48	15.5967	--	-	-	-
CL5005.Contig2_DB	2	18.48	49.76	40.1	36.1133	1.41	3.6	2.92	2.64333	16.36	11.02	23.13	16.8367	Probable LRR receptor-like serine/threonine-protein kinase At3g47570 OS=Arabidopsis thaliana GN=At3g47570 PE=1 SV=1	GO:0006955//immune response;GO:0050794//regulation of cellular process;GO:0051716//cellular response to stimulus	GO:0016772//transferase activity, transferring phosphorus-containing groups	GO:0005739//mitochondrion;GO:0016023//cytoplasmic membrane-bounded vesicle
CL25844.Contig1_DB	2	41.49	39.25	27.59	36.11	7.73	15.88	11.13	11.58	20.54	37.6	11.4	23.18	--	-	-	GO:0016020//membrane
CL1299.Contig2_DB	2	36.39	38.99	32.65	36.01	12.5	14.3	12.04	12.9467	12.34	21.09	23.43	18.9533	--	GO:0016556//mRNA modification;GO:0000023//maltose metabolic process;GO:0019252//starch biosynthetic process;GO:0010207//photosystem II assembly;GO:0010275//NAD(P)H dehydrogenase complex assembly	-	GO:0010598//NAD(P)H dehydrogenase complex (plastoquinone);GO:0009570//chloroplast stroma;GO:0005634//nucleus
CL7621.Contig10_DB	2	37.67	43.52	26.73	35.9733	5.3	5.76	5.76	5.60667	6.14	13.35	17.17	12.22	--	-	-	-
CL22521.Contig3_DB	2	34.11	49.32	24.28	35.9033	5.28	6.06	7.6	6.31333	10.95	10.34	16.57	12.62	--	-	-	-
CL1950.Contig2_DB	2	40.89	39.52	26.5	35.6367	7.29	10.99	17.97	12.0833	19.98	13.59	18.13	17.2333	Protein NLP2 OS=Oryza sativa subsp. japonica GN=NLP2 PE=2 SV=2	GO:0006355//regulation of transcription, DNA-dependent	GO:0003677//DNA binding	GO:0005634//nucleus
CL8348.Contig1_DB	2	38.26	38.25	30.38	35.63	15.57	11.36	11.72	12.8833	24.41	30.29	14.76	23.1533	Uncharacterized protein At5g01610 OS=Arabidopsis thaliana GN=At5g01610 PE=1 SV=1	-	-	GO:0016023//cytoplasmic membrane-bounded vesicle;GO:0009507//chloroplast
CL10600.Contig2_DB	2	41.38	37.37	28.14	35.63	9.07	17.43	10.1	12.2	28.81	32.38	20.78	27.3233	Cytokinin dehydrogenase 11 OS=Oryza sativa subsp. japonica GN=CKX11 PE=2 SV=1	GO:0009690//cytokinin metabolic process;GO:0055114//oxidation-reduction process	GO:0050660//flavin adenine dinucleotide binding;GO:0008762//UDP-N-acetylmuramate dehydrogenase activity;GO:0019139//cytokinin dehydrogenase activity	-
Unigene38535_DB	2	43.25	32.07	31.46	35.5933	5.5	3.29	11.76	6.85	11.86	38.08	9.47	19.8033	Leucine-rich repeat extensin-like protein 5 OS=Arabidopsis thaliana GN=LRX5 PE=2 SV=2	GO:0051607//defense response to virus	-	GO:0009505//plant-type cell wall
Unigene66_DB	2	20.15	52.63	33.26	35.3467	3.93	6.66	10.74	7.11	16.16	11.2	17.04	14.8	LysM domain-containing GPI-anchored protein 1 OS=Arabidopsis thaliana GN=LYM1 PE=1 SV=1	GO:0016998//cell wall macromolecule catabolic process	-	GO:0046658//anchored to plasma membrane;GO:0016023//cytoplasmic membrane-bounded vesicle
CL1952.Contig1_DB	2	46.59	17.99	40.37	34.9833	0.9	0	1.43	0.776667	8.55	8.53	10.8	9.29333	--	-	-	-
CL25746.Contig1_DB	2	48.3	41.68	14.95	34.9767	4.07	8.94	3.56	5.52333	18.82	23.89	5.27	15.9933	--	-	-	-
Unigene41961_DB	2	39.78	53.08	11.14	34.6667	3.72	7.63	9.05	6.8	27.23	9.39	11.78	16.1333	--	-	-	-
Unigene35060_DB	2	37.32	33.22	33.35	34.63	9.03	9.88	14.95	11.2867	20.63	25.23	16.98	20.9467	Zinc finger CCCH domain-containing protein 56 OS=Oryza sativa subsp. japonica GN=Os08g0159800 PE=2 SV=1	-	GO:0008270//zinc ion binding;GO:0003677//DNA binding	-
CL18917.Contig3_DB	2	21.03	65.29	17.42	34.58	1.9	3.52	6.22	3.88	10.63	20.49	15.39	15.5033	Arginine/serine-rich protein 45 OS=Arabidopsis thaliana GN=SR45 PE=1 SV=1	-	-	-
CL3966.Contig4_DB	2	46.48	29.02	28.18	34.56	5.31	7.21	13.5	8.67333	17.55	14.72	19.11	17.1267	Protein IQ-DOMAIN 1 OS=Arabidopsis thaliana GN=IQD1 PE=1 SV=1	-	-	-
Unigene39853_DB	2	23.78	43.17	36.4	34.45	15.41	7.75	9.03	10.73	14.75	16.49	10.84	14.0267	--	-	-	-
CL19132.Contig1_DB	2	28.23	44.14	30.76	34.3767	9.74	10.23	15.07	11.68	13.23	16.32	22.98	17.51	F-box/kelch-repeat protein SKIP25 OS=Arabidopsis thaliana GN=SKIP25 PE=1 SV=1	-	-	-
CL28172.Contig3_DB	2	12.38	53.68	36.76	34.2733	7.5	9.42	8.09	8.33667	13.48	22.42	23.32	19.74	--	-	-	-
CL3077.Contig1_DB	2	34.77	38.75	28.83	34.1167	12.49	5.05	8.49	8.67667	12.5	15.67	6.85	11.6733	Cyclin-P4-1 OS=Oryza sativa subsp. japonica GN=CYCP4-1 PE=2 SV=1	GO:0000079//regulation of cyclin-dependent protein serine/threonine kinase activity	GO:0019901//protein kinase binding	-
CL6802.Contig1_DB	2	35.02	31.19	35.91	34.04	5.44	8.99	12.39	8.94	16.33	13.75	10.95	13.6767	Vegetative cell wall protein gp1 OS=Chlamydomonas reinhardtii GN=GP1 PE=2 SV=1	GO:0006355//regulation of transcription, DNA-dependent;GO:0008380//RNA splicing;GO:0006397//mRNA processing	GO:0003677//DNA binding	GO:0005681//spliceosomal complex
CL11120.Contig3_DB	2	37.49	43.1	21.51	34.0333	7.83	5.94	6.27	6.68	13.36	18.8	3.67	11.9433	Sulfated surface glycoprotein 185 OS=Volvox carteri PE=1 SV=1	-	-	GO:0016023//cytoplasmic membrane-bounded vesicle;GO:0005773//vacuole
CL11641.Contig1_DB	2	39.75	39.24	22.79	33.9267	12.27	12.79	12.5	12.52	21.57	21.04	26.99	23.2	Bet1-like protein At4g14600 OS=Arabidopsis thaliana GN=At4g14600 PE=2 SV=1	-	-	GO:0005886//plasma membrane
CL21111.Contig2_DB	2	22.68	35.29	43.81	33.9267	11.33	6.9	6.97	8.4	12.87	26.81	19.92	19.8667	Probable ribose-5-phosphate isomerase OS=Arabidopsis thaliana GN=At2g01290 PE=2 SV=1	GO:0009052//pentose-phosphate shunt, non-oxidative branch	GO:0004751//ribose-5-phosphate isomerase activity	GO:0009507//chloroplast
CL14420.Contig2_DB	2	23.08	49.72	28.33	33.71	11.45	11.12	12.31	11.6267	15.59	13.73	19.59	16.3033	Leucine-rich repeat extensin-like protein 3 OS=Arabidopsis thaliana GN=LRX3 PE=1 SV=1	-	-	-
Unigene25943_DB	2	38.68	29.38	32.92	33.66	4.53	10.5	13.79	9.60667	18.04	23.97	7.45	16.4867	--	GO:0016310//phosphorylation	GO:0016301//kinase activity	GO:0005576//extracellular region;GO:0016020//membrane;GO:0016023//cytoplasmic membrane-bounded vesicle
CL19591.Contig1_DB	2	23.75	53.69	23.29	33.5767	1.48	1.72	3.96	2.38667	18.79	12.64	13.99	15.14	--	-	-	-
CL20583.Contig1_DB	2	25.92	44.96	29.84	33.5733	6.6	8.33	5.74	6.89	17.47	9	14.41	13.6267	--	-	-	-
CL12533.Contig4_DB	2	38.11	35.81	26.56	33.4933	11.07	7.92	9.44	9.47667	16.99	31.21	18.86	22.3533	--	-	-	-
Unigene33143_DB	2	32.06	48.86	19.33	33.4167	6.31	2.53	8.27	5.70333	11.13	14.08	10.13	11.78	--	-	-	-
CL3875.Contig1_DB	2	36.39	37.96	25.12	33.1567	10.86	10.69	13.36	11.6367	19.61	21.61	15.33	18.85	Transcription factor PIF3 OS=Arabidopsis thaliana GN=PIF3 PE=1 SV=1	-	-	GO:0009536//plastid
Unigene2883_DB	2	31.95	29.4	36.75	32.7	3.01	1.75	10.48	5.08	8.6	20.41	0.79	9.93333	Formin-like protein 5 OS=Oryza sativa subsp. japonica GN=FH5 PE=2 SV=2	-	-	-
CL11554.Contig2_DB	2	46.55	26.21	25.16	32.64	4.46	3.47	6.96	4.96333	8.35	11.88	5.53	8.58667	Uncharacterized membrane protein At1g75140 OS=Arabidopsis thaliana GN=At1g75140 PE=1 SV=3	-	-	GO:0016023//cytoplasmic membrane-bounded vesicle;GO:0005783//endoplasmic reticulum
CL7019.Contig3_DB	2	32.35	50.2	14.66	32.4033	6.78	5.71	13.11	8.53333	26.54	25.27	16.75	22.8533	--	-	-	-
CL2960.Contig2_DB	2	38.67	19.7	38.47	32.28	2.84	9.66	11.05	7.85	16.13	11.14	11.09	12.7867	F-box/LRR-repeat MAX2 homolog OS=Oryza sativa subsp. japonica GN=D3 PE=2 SV=2	GO:0044267//cellular protein metabolic process;GO:0009414//response to water deprivation;GO:0009416//response to light stimulus;GO:0010016//shoot system morphogenesis;GO:0009926//auxin polar transport;GO:0009934//regulation of meristem structural organization;GO:0007568//aging	-	GO:0000151//ubiquitin ligase complex;GO:0005634//nucleus
Unigene36281_DB	2	29.58	31.86	34.34	31.9267	4.53	9.05	8.59	7.39	11.76	14.01	9.95	11.9067	Vegetative cell wall protein gp1 OS=Chlamydomonas reinhardtii GN=GP1 PE=2 SV=1	GO:0070918//production of small RNA involved in gene silencing by RNA;GO:0016570//histone modification;GO:0009910//negative regulation of flower development;GO:0035194//posttranscriptional gene silencing by RNA;GO:0006352//DNA-dependent transcription, initiation;GO:0009628//response to abiotic stimulus;GO:0045893//positive regulation of transcription, DNA-dependent	GO:0003677//DNA binding	GO:0005634//nucleus
Unigene30590_DB	2	36.17	41.61	17.44	31.74	8.01	5.21	8.65	7.29	13.59	18.86	22.54	18.33	--	-	-	-
CL23519.Contig1_DB	2	35.26	28.32	30.69	31.4233	7.14	10.21	12.45	9.93333	15.42	17.17	14.99	15.86	Probable WRKY transcription factor 4 OS=Arabidopsis thaliana GN=WRKY4 PE=1 SV=2	-	GO:0003677//DNA binding	-
CL7801.Contig2_DB	2	19.87	46.08	28.1	31.35	4.16	10.15	4.18	6.16333	13.59	17.14	27.1	19.2767	--	-	-	-
CL4350.Contig1_DB	2	40.28	31.4	22.31	31.33	5.77	9.84	12.83	9.48	13.7	13.13	9.08	11.97	--	-	-	-
Unigene5007_DB	2	46.9	24.76	22.09	31.25	4.51	4.51	17.1	8.70667	6.39	12.56	14.58	11.1767	--	-	-	-
CL11508.Contig2_DB	2	28.78	29.21	35.64	31.21	11.86	9.55	10.96	10.79	18.46	16.13	15.54	16.71	Ethylene-responsive transcription factor RAP2-7 OS=Arabidopsis thaliana GN=RAP2-7 PE=2 SV=2	GO:0006355//regulation of transcription, DNA-dependent	GO:0003700//sequence-specific DNA binding transcription factor activity;GO:0003677//DNA binding	GO:0005634//nucleus
CL3045.Contig2_DB	2	29.66	33.36	30.56	31.1933	8.83	13.94	8.58	10.45	16.98	17.82	10.62	15.14	Serine/threonine-protein kinase HT1 OS=Arabidopsis thaliana GN=HT1 PE=1 SV=1	GO:0006468//protein phosphorylation	GO:0004713//protein tyrosine kinase activity;GO:0005524//ATP binding;GO:0004674//protein serine/threonine kinase activity	GO:0005886//plasma membrane
CL1049.Contig1_DB	2	30.65	27.3	35.62	31.19	7.16	9.84	14.85	10.6167	17.11	14.51	14.3	15.3067	Probable serine protease EDA2 OS=Arabidopsis thaliana GN=EDA2 PE=2 SV=2	GO:0009086//methionine biosynthetic process;GO:0006508//proteolysis;GO:0000394//RNA splicing, via endonucleolytic cleavage and ligation	GO:0004180//carboxypeptidase activity;GO:0008236//serine-type peptidase activity	GO:0005829//cytosol;GO:0009507//chloroplast;GO:0005773//vacuole
Unigene2872_DB	2	33.71	32.31	27.28	31.1	8.56	6.59	9.65	8.26667	10.77	14.86	6.92	10.85	F-box protein FBW2 OS=Arabidopsis thaliana GN=FBW2 PE=1 SV=1	GO:0010608//posttranscriptional regulation of gene expression	-	-
CL6963.Contig2_DB	2	29.95	38.91	23.67	30.8433	6.73	6.54	2.84	5.37	22.08	18.01	16.87	18.9867	Arginine/serine-rich protein 45 OS=Arabidopsis thaliana GN=SR45 PE=1 SV=1	-	-	-
Unigene28000_DB	2	43.54	13.24	35.65	30.81	3.73	5.76	9.27	6.25333	14.18	23.02	11.7	16.3	Formin-like protein 5 OS=Oryza sativa subsp. japonica GN=FH5 PE=2 SV=2	GO:0071704;GO:0050896//response to stimulus;GO:0009987//cellular process	GO:0003824//catalytic activity	GO:0044424//intracellular part
CL9629.Contig1_DB	2	25.75	45.02	21.44	30.7367	6.86	5.45	10.29	7.53333	8.6	19.77	17.1	15.1567	--	-	-	-
CL6059.Contig1_DB	2	36.63	30.57	24.4	30.5333	8.57	10.58	11.95	10.3667	19.24	24.65	19.35	21.08	Early nodulin-like protein 2 OS=Arabidopsis thaliana GN=At4g27520 PE=1 SV=1	GO:0000226//microtubule cytoskeleton organization	GO:0008270//zinc ion binding	GO:0005622//intracellular
CL16453.Contig2_DB	2	24.69	34.26	32.49	30.48	8.66	11.66	8.42	9.58	18.17	16.12	20.87	18.3867	--	-	-	-
CL22626.Contig2_DB	2	34.2	39.71	17.47	30.46	8.38	11.89	13.46	11.2433	19.37	28.09	24.33	23.93	Formin-like protein 20 OS=Arabidopsis thaliana GN=FH20 PE=2 SV=3	-	-	-
CL4351.Contig2_DB	2	30.73	35.89	23.83	30.15	4.46	10.34	13.82	9.54	11.35	17.83	15.08	14.7533	Anaphase-promoting complex subunit 7 OS=Arabidopsis thaliana GN=APC7 PE=2 SV=1	-	-	-
Unigene32488_DB	2	33.18	24.98	31.92	30.0267	6.59	11.35	15.61	11.1833	21.83	14.73	23.94	20.1667	Chitin-binding lectin 1 OS=Solanum tuberosum PE=1 SV=2	GO:0008654//phospholipid biosynthetic process;GO:0032259//methylation	GO:0000773//phosphatidyl-N-methylethanolamine N-methyltransferase activity;GO:0080101//phosphatidyl-N-dimethylethanolamine N-methyltransferase activity	GO:0009507//chloroplast
CL15681.Contig1_DB	2	34.53	33.72	21.31	29.8533	3.62	3.55	5.47	4.21333	12.2	17.69	15.76	15.2167	--	-	-	-
Unigene42658_DB	2	22.99	40.32	25.72	29.6767	5.66	7.37	6.47	6.5	9.67	17.29	13.35	13.4367	F-box protein At5g46170 OS=Arabidopsis thaliana GN=At5g46170 PE=2 SV=1	-	-	-
CL28138.Contig1_DB	2	26.71	31.18	30.86	29.5833	5.26	4.25	12.64	7.38333	21.45	24.83	12.81	19.6967	Leucine-rich repeat extensin-like protein 5 OS=Arabidopsis thaliana GN=LRX5 PE=2 SV=2	-	-	GO:0009536//plastid
CL6939.Contig2_DB	2	26.61	39.59	22.36	29.52	4.57	3.41	9.18	5.72	4.36	14.04	8.79	9.06333	CASP-like protein Sb06g005640 OS=Sorghum bicolor GN=Sb06g005640 PE=2 SV=1	-	-	GO:0016020//membrane
CL1352.Contig1_DB	2	32.25	31.75	24.53	29.51	0.58	2.69	5.56	2.94333	4.42	14.54	7.29	8.75	--	-	-	-
CL20911.Contig1_DB	2	32.69	31.37	23.53	29.1967	5.68	8.54	13.48	9.23333	21.44	27.83	13.07	20.78	Arginine/serine-rich protein 45 OS=Arabidopsis thaliana GN=SR45 PE=1 SV=1	-	-	GO:0005739//mitochondrion
CL7411.Contig9_DB	2	29.43	27.97	30.05	29.15	6.89	4.2	10.33	7.14	7.7	9.41	11.75	9.62	--	GO:0007275//multicellular organismal development;GO:0042372//phylloquinone biosynthetic process	GO:0047617//acyl-CoA hydrolase activity	GO:0005777//peroxisome;GO:0009507//chloroplast
Unigene1644_DB	2	42.85	30.78	13.79	29.14	5.1	4.34	9.2	6.21333	6.01	20.18	4.99	10.3933	--	-	-	-
CL5052.Contig2_DB	2	37.42	42.13	7.52	29.0233	3.49	6.52	9.2	6.40333	6.23	16.05	4.99	9.09	--	-	-	-
Unigene2448_DB	2	25.61	40.54	20.78	28.9767	8.97	7.3	14.59	10.2867	11.64	17.53	13.69	14.2867	Vegetative cell wall protein gp1 OS=Chlamydomonas reinhardtii GN=GP1 PE=2 SV=1	GO:0006184//GTP catabolic process	GO:0005509//calcium ion binding;GO:0003924//GTPase activity;GO:0005525//GTP binding	-
CL9062.Contig1_DB	2	30.94	28.36	27.4	28.9	2.93	11.12	7.79	7.28	13.18	15.86	19.99	16.3433	Vegetative cell wall protein gp1 OS=Chlamydomonas reinhardtii GN=GP1 PE=2 SV=1	GO:0008284//positive regulation of cell proliferation;GO:0009560//embryo sac egg cell differentiation	-	GO:0005634//nucleus
CL1034.Contig1_DB	2	35.81	20.27	29.61	28.5633	6.06	5.25	12.66	7.99	12.49	12.44	12.01	12.3133	Disease resistance protein RGA2 OS=Solanum bulbocastanum GN=RGA2 PE=1 SV=1	-	GO:0000166//nucleotide binding	-
Unigene5181_DB	2	39.67	35.73	10.22	28.54	2.26	5.19	3.33	3.59333	6.27	8.98	8.92	8.05667	--	-	-	-
CL2353.Contig2_DB	2	32.65	32.23	20.14	28.34	6.55	2.61	8.48	5.88	9.26	19.33	13.37	13.9867	Transcription factor TCP21 OS=Arabidopsis thaliana GN=TCP21 PE=1 SV=1	GO:0006355//regulation of transcription, DNA-dependent;GO:0007165//signal transduction;GO:0006952//defense response	-	-
CL4892.Contig2_DB	2	31.32	34.5	18.7	28.1733	3.93	13.01	7.76	8.23333	19.44	22.56	11.31	17.77	F-box protein At4g18380 OS=Arabidopsis thaliana GN=At4g18380 PE=2 SV=1	-	-	-
CL4070.Contig1_DB	2	25.85	30.38	28.02	28.0833	2.9	6.26	4.72	4.62667	24.75	18.83	15.67	19.75	RING-H2 finger protein ATL74 OS=Arabidopsis thaliana GN=ATL74 PE=2 SV=1	-	GO:0008270//zinc ion binding	-
Unigene43798_DB	2	31.47	28.99	22.82	27.76	3.89	5.44	7.52	5.61667	17.8	8.61	4.91	10.44	CASP-like protein Os02g0134500 OS=Oryza sativa subsp. japonica GN=Os02g0134500 PE=2 SV=2	GO:0042752//regulation of circadian rhythm;GO:0006355//regulation of transcription, DNA-dependent;GO:0000398//mRNA splicing, via spliceosome	GO:0003677//DNA binding	GO:0005681//spliceosomal complex;GO:0031981//nuclear lumen
CL24318.Contig1_DB	2	33.35	25.49	24.17	27.67	6.38	7.25	9.18	7.60333	15.83	15.98	19.04	16.95	Heat stress transcription factor A-4b OS=Oryza sativa subsp. japonica GN=HSFA4B PE=2 SV=1	GO:0006950//response to stress;GO:0006355//regulation of transcription, DNA-dependent	GO:0003700//sequence-specific DNA binding transcription factor activity;GO:0043565//sequence-specific DNA binding	GO:0005737//cytoplasm;GO:0005634//nucleus
CL19892.Contig1_DB	2	21.27	26.56	34.7	27.51	6.86	8.88	14.61	10.1167	11.25	22.56	8.46	14.09	E3 ubiquitin-protein ligase RING1-like OS=Arabidopsis thaliana GN=At3g19950 PE=2 SV=1	-	-	-
CL13567.Contig1_DB	2	29.01	27.17	25.68	27.2867	8.81	9.42	11.21	9.81333	21.82	14.16	13.65	16.5433	OTU domain-containing protein At3g57810 OS=Arabidopsis thaliana GN=At3g57810 PE=2 SV=1	GO:0006606//protein import into nucleus	GO:0008234//cysteine-type peptidase activity	GO:0005829//cytosol
CL9185.Contig1_DB	2	36.77	25.74	18.83	27.1133	4.49	2.3	5.27	4.02	6.3	24.35	6.75	12.4667	Probable galacturonosyltransferase-like 1 OS=Arabidopsis thaliana GN=GATL1 PE=2 SV=1	GO:0009867//jasmonic acid mediated signaling pathway;GO:0010363//regulation of plant-type hypersensitive response;GO:0032504//multicellular organism reproduction;GO:0006612//protein targeting to membrane;GO:0010051//xylem and phloem pattern formation;GO:0006569//tryptophan catabolic process;GO:0010417//glucuronoxylan biosynthetic process;GO:0009684//indoleacetic acid biosynthetic process;GO:00193…	GO:0047262//polygalacturonate 4-alpha-galacturonosyltransferase activity	GO:0005783//endoplasmic reticulum
CL20774.Contig1_DB	2	26.8	27.31	27.2	27.1033	6.24	6.68	11.48	8.13333	13.01	15.19	11.75	13.3167	Uncharacterized protein At2g33490 OS=Arabidopsis thaliana GN=At2g33490 PE=1 SV=2	-	-	GO:0005739//mitochondrion
Unigene33636_DB	2	28.3	36.83	15.83	26.9867	4.1	8.13	10.58	7.60333	8.9	18.73	12.84	13.49	--	-	-	-
CL19620.Contig5_DB	2	24.27	35.94	19.78	26.6633	6.84	5.61	10.84	7.76333	11.74	15.5	15.41	14.2167	--	-	-	-
CL9829.Contig1_DB	2	18.29	38.23	22.64	26.3867	5.71	3.18	5.81	4.9	21.73	18.37	20.58	20.2267	--	-	-	GO:0016020//membrane
Unigene37345_DB	2	19.41	31.02	28.64	26.3567	5.22	7.1	9.02	7.11333	21.57	11.34	9.87	14.26	--	-	-	-
CL5281.Contig1_DB	2	36.77	18.93	23.27	26.3233	7.52	4.36	3.32	5.06667	18.88	18.76	21.73	19.79	Cinnamate beta-D-glucosyltransferase OS=Fragaria ananassa GN=GT2 PE=1 SV=1	GO:0008152//metabolic process	GO:0016758//transferase activity, transferring hexosyl groups	-
CL952.Contig2_DB	2	20.98	22.71	35.24	26.31	8.83	8.51	9.23	8.85667	17.37	18.57	13.98	16.64	Protein LURP-one-related 8 OS=Arabidopsis thaliana GN=At2g38640 PE=2 SV=1	-	-	GO:0009536//plastid
Unigene37033_DB	2	20.07	37.87	20.91	26.2833	2.38	3.59	0	1.99	10.9	14.47	9.23	11.5333	Proline-rich receptor-like protein kinase PERK2 OS=Arabidopsis thaliana GN=PERK2 PE=2 SV=3	-	-	-
CL1709.Contig2_DB	2	25.37	21.96	31.01	26.1133	8.66	3.42	10.09	7.39	20.02	25.83	16.77	20.8733	37 kDa inner envelope membrane protein, chloroplastic OS=Spinacia oleracea PE=1 SV=1	GO:0010189//vitamin E biosynthetic process;GO:0010236//plastoquinone biosynthetic process;GO:0032259//methylation	GO:0051741//2-methyl-6-phytyl-1,4-benzoquinone methyltransferase activity	GO:0009941//chloroplast envelope;GO:0019031//viral envelope
CL11502.Contig1_DB	2	25.3	27.08	25.52	25.9667	8.35	7.31	10.4	8.68667	16.57	13.62	9.12	13.1033	--	-	GO:0008270//zinc ion binding;GO:0003676//nucleic acid binding	-
Unigene996_DB	2	17.87	39.74	19.43	25.68	4.29	3.33	3.14	3.58667	9.47	19.9	24.38	17.9167	--	-	-	-
CL3469.Contig1_DB	2	33.37	16.28	27.08	25.5767	2.98	6.38	10.48	6.61333	10.23	11.95	8.41	10.1967	Expansin-like A1 OS=Oryza sativa subsp. japonica GN=EXLA1 PE=2 SV=1	GO:0006355//regulation of transcription, DNA-dependent;GO:0007165//signal transduction	-	GO:0009505//plant-type cell wall;GO:0016023//cytoplasmic membrane-bounded vesicle;GO:0005576//extracellular region;GO:0016020//membrane
Unigene42698_DB	2	28.41	23.09	25.01	25.5033	3.42	4.23	2.57	3.40667	19.85	19.53	12.9	17.4267	--	GO:0009826//unidimensional cell growth;GO:0009734//auxin mediated signaling pathway;GO:0008152//metabolic process;GO:0009640//photomorphogenesis;GO:0009723//response to ethylene stimulus	GO:0008080//N-acetyltransferase activity	-
CL5525.Contig5_DB	2	27.91	27.13	21.15	25.3967	5.19	3.78	8.67	5.88	14.81	21.32	15.49	17.2067	Arginine/serine-rich protein 45 OS=Arabidopsis thaliana GN=SR45 PE=1 SV=1	-	-	-
CL18412.Contig1_DB	2	24.1	28.2	23.8	25.3667	4.75	4.31	4.48	4.51333	6.75	9.45	6.07	7.42333	U-box domain-containing protein 33 OS=Arabidopsis thaliana GN=PUB33 PE=2 SV=2	GO:0016310//phosphorylation;GO:0006464//cellular protein modification process	GO:0004672//protein kinase activity;GO:0000166//nucleotide binding	GO:0009536//plastid
Unigene31136_DB	2	22.58	28.54	24.38	25.1667	2.97	2.75	5.04	3.58667	7.51	23.13	7.44	12.6933	--	-	-	GO:0016023//cytoplasmic membrane-bounded vesicle
CL14282.Contig2_DB	2	20.06	34.52	20.8	25.1267	5.14	4.68	7.88	5.9	10.62	9.73	8.52	9.62333	SKP1-interacting partner 15 OS=Arabidopsis thaliana GN=SKIP15 PE=1 SV=1	GO:0009987//cellular process;GO:0044699	GO:0005515//protein binding	-
CL14951.Contig2_DB	2	26.37	25.94	22.91	25.0733	5.7	6.95	9.84	7.49667	12.75	17.25	13.43	14.4767	--	-	-	-
Unigene32331_DB	2	28.37	18.06	28.69	25.04	6.15	2.06	6.64	4.95	6.71	4.43	11.12	7.42	--	-	-	-
CL14951.Contig1_DB	2	25.46	28.14	21.19	24.93	7.67	6.87	9.18	7.90667	14.15	16.3	14.1	14.85	--	-	-	-
Unigene29401_DB	2	21.91	33.03	19.28	24.74	4.11	4.77	2.92	3.93333	10.41	9.6	13.62	11.21	--	-	-	-
CL3544.Contig1_DB	2	22.71	28.76	22.59	24.6867	7.37	7.08	7.8	7.41667	18.86	17.04	17.06	17.6533	BTB/POZ domain-containing protein At2g04740 OS=Arabidopsis thaliana GN=At2g04740 PE=2 SV=2	GO:0009954//proximal/distal pattern formation;GO:0048439//flower morphogenesis;GO:0006414//translational elongation;GO:0010227//floral organ abscission	GO:0003746//translation elongation factor activity	GO:0005737//cytoplasm
Unigene35053_DB	2	22.6	38.39	12.97	24.6533	3.25	6.82	8.48	6.18333	5.75	10.15	12.22	9.37333	Proline-rich receptor-like protein kinase PERK1 OS=Arabidopsis thaliana GN=PERK1 PE=1 SV=1	GO:0044238//primary metabolic process;GO:0044260;GO:0044699	GO:0016772//transferase activity, transferring phosphorus-containing groups	GO:0016020//membrane
CL3518.Contig1_DB	2	23.79	24.75	25.41	24.65	8.12	5.68	8.76	7.52	15.89	15.56	14.8	15.4167	Probable leucine-rich repeat receptor-like protein kinase At1g35710 OS=Arabidopsis thaliana GN=At1g35710 PE=2 SV=1	GO:0055046//microgametogenesis	-	-
CL2057.Contig1_DB	2	21.1	25.46	27.34	24.6333	4.35	6.51	9.83	6.89667	10.54	14.93	11.79	12.42	--	-	-	-
CL19402.Contig2_DB	2	37.25	23.91	12.04	24.4	4.33	7.56	11.85	7.91333	9.61	20.75	6.39	12.25	Protein LONGIFOLIA 1 OS=Arabidopsis thaliana GN=LNG1 PE=1 SV=1	-	-	-
CL24365.Contig1_DB	2	19.84	21.81	31.42	24.3567	4.67	8.49	5.73	6.29667	24.56	8.51	25.45	19.5067	Probable polyol transporter 3 OS=Arabidopsis thaliana GN=PLT3 PE=3 SV=1	GO:0015791//polyol transport;GO:0008645//hexose transport;GO:0015750;GO:0055085//transmembrane transport	GO:0015149//hexose transmembrane transporter activity;GO:0015166//polyol transmembrane transporter activity;GO:0015146//pentose transmembrane transporter activity	GO:0016021//integral to membrane
Unigene34879_DB	2	35.26	29.11	7.38	23.9167	2.91	0	4.29	2.4	5.55	7.31	3.06	5.30667	--	-	-	-
Unigene37738_DB	2	18.08	39.32	14.24	23.88	3.04	3.97	8.93	5.31333	13.92	18.14	15.68	15.9133	--	-	-	-
Unigene10895_DB	2	11.9	30.69	28.7	23.7633	3	4.67	5.42	4.36333	5.15	7.56	9.03	7.24667	--	-	-	-
Unigene35829_DB	2	26.61	21.76	22.89	23.7533	4.71	2.04	7.5	4.75	3.72	12.34	6.14	7.4	AP2-like ethylene-responsive transcription factor At1g16060 OS=Arabidopsis thaliana GN=At1g16060 PE=2 SV=1	GO:0045723//positive regulation of fatty acid biosynthetic process;GO:0009414//response to water deprivation;GO:1901959//positive regulation of cutin biosynthetic process;GO:0006355//regulation of transcription, DNA-dependent;GO:0009651//response to salt stress;GO:0040008//regulation of growth;GO:0009887//organ morphogenesis;GO:0010187//negative regulation of seed germination;GO:0009737//response…	GO:0000981//sequence-specific DNA binding RNA polymerase II transcription factor activity;GO:0003677//DNA binding	GO:0009536//plastid;GO:0005634//nucleus
CL6382.Contig1_DB	2	26.36	21.61	23.19	23.72	5.59	3.48	7.38	5.48333	23.65	16.72	15.99	18.7867	Leucine-rich repeat receptor protein kinase EXS OS=Arabidopsis thaliana GN=EXS PE=1 SV=1	GO:0010162//seed dormancy process;GO:0009740//gibberellic acid mediated signaling pathway	GO:0016787//hydrolase activity	GO:0005886//plasma membrane;GO:0005634//nucleus
CL11989.Contig4_DB	2	20.54	35.01	15.47	23.6733	4.65	1.38	1.27	2.43333	10.4	10.64	3.88	8.30667	--	-	-	-
Unigene40987_DB	2	17.75	21.52	31.57	23.6133	2.99	5.87	2.17	3.67667	12.72	7.07	25.34	15.0433	Polyol transporter 5 OS=Arabidopsis thaliana GN=PLT5 PE=1 SV=2	GO:0055085//transmembrane transport	GO:0022891//substrate-specific transmembrane transporter activity	GO:0016021//integral to membrane
CL10931.Contig1_DB	2	23.05	19.12	28.39	23.52	7.19	10.53	8.34	8.68667	16.27	14	10.38	13.55	F-box/kelch-repeat protein SKIP30 OS=Arabidopsis thaliana GN=SKIP30 PE=1 SV=2	-	-	-
Unigene4108_DB	2	19.46	20.92	30.12	23.5	4.54	4.68	12.39	7.20333	10.33	14.74	4.02	9.69667	Formin-like protein 5 OS=Oryza sativa subsp. japonica GN=FH5 PE=2 SV=2	-	-	-
CL10267.Contig3_DB	2	20.38	24.72	25.29	23.4633	4.28	2.48	3.57	3.44333	6.41	9.61	2.57	6.19667	Protein CHLOROPLAST IMPORT APPARATUS 2 OS=Arabidopsis thaliana GN=CIA2 PE=2 SV=1	-	-	-
CL26701.Contig2_DB	2	26.25	29.9	14.1	23.4167	3.14	2.41	3.32	2.95667	14.78	9.9	8.71	11.13	Extensin OS=Nicotiana tabacum GN=HRGPNT3 PE=2 SV=1	-	-	-
CL812.Contig4_DB	2	25.77	23.71	20.57	23.35	4.58	3.95	12.59	7.04	15.33	0	22.62	12.65	Vegetative cell wall protein gp1 OS=Chlamydomonas reinhardtii GN=GP1 PE=2 SV=1	GO:0006284//base-excision repair	GO:0003905//alkylbase DNA N-glycosylase activity	GO:0005634//nucleus;GO:0009536//plastid
CL10291.Contig4_DB	2	16.91	30.43	22.49	23.2767	8.37	4.95	6.5	6.60667	16.56	8	13.22	12.5933	Transcription factor ATR2 OS=Arabidopsis thaliana GN=ATR2 PE=1 SV=1	-	-	GO:0043231//intracellular membrane-bounded organelle
Unigene39564_DB	2	21.25	34.39	14.12	23.2533	4.8	5.58	4.4	4.92667	13.05	9.63	5.03	9.23667	--	-	-	-
CL4663.Contig2_DB	2	24.77	25	19.74	23.17	3.84	8.05	4.94	5.61	7.8	10.8	5.64	8.08	Endo-1,3;1,4-beta-D-glucanase OS=Zea mays PE=1 SV=1	GO:0009651//response to salt stress	GO:0016787//hydrolase activity	GO:0005737//cytoplasm;GO:0048046//apoplast;GO:0005634//nucleus;GO:0005886//plasma membrane
CL2911.Contig1_DB	2	26.87	23.42	19.13	23.14	1.84	3.74	4.45	3.34333	5.86	18.27	11.7	11.9433	--	-	-	-
CL4478.Contig3_DB	2	29.44	18.87	21.08	23.13	4.44	8.28	10.08	7.6	7.2	12.01	9.19	9.46667	U2 small nuclear ribonucleoprotein A' OS=Arabidopsis thaliana GN=At1g09760 PE=2 SV=2	GO:0009409//response to cold;GO:0000398//mRNA splicing, via spliceosome;GO:0001510//RNA methylation	GO:0003676//nucleic acid binding	GO:0005730//nucleolus;GO:0015030//Cajal body;GO:0009507//chloroplast;GO:0030529//ribonucleoprotein complex;GO:0005829//cytosol
CL565.Contig1_DB	2	34.66	16.07	18.61	23.1133	4.04	5.42	10.91	6.79	8.67	14.57	5.65	9.63	--	-	-	-
CL6024.Contig1_DB	2	22.31	28.16	18.37	22.9467	4.19	3.94	5.26	4.46333	14.87	14.99	7.87	12.5767	--	-	-	-
CL9981.Contig1_DB	2	27.32	14.11	27.24	22.89	6.64	3.36	8.11	6.03667	11.15	21.12	9.99	14.0867	Arginine/serine-rich protein 45 OS=Arabidopsis thaliana GN=SR45 PE=1 SV=1	-	-	GO:0016020//membrane
CL4933.Contig4_DB	2	27.36	24.83	16.41	22.8667	4.51	5.05	8.56	6.04	11.04	17.1	16.76	14.9667	Nucleolin 2 OS=Oryza sativa subsp. japonica GN=Os04g0620700 PE=2 SV=2	-	-	-
CL14903.Contig2_DB	2	29.86	19.37	19.19	22.8067	5.36	7.36	8.84	7.18667	8.82	11.49	7.62	9.31	MAR-binding filament-like protein 1 OS=Arabidopsis thaliana GN=MFP1 PE=1 SV=2	-	-	GO:0005739//mitochondrion
CL28415.Contig1_DB	2	16.62	35.96	15.34	22.64	2.68	4.42	10.28	5.79333	5.62	9.73	7.7	7.68333	Vacuolar iron transporter homolog 5 OS=Oryza sativa subsp. japonica GN=Os04g0686800 PE=2 SV=3	-	-	GO:0016020//membrane
CL13986.Contig4_DB	2	16.04	22.79	28.71	22.5133	4.85	5.93	3.55	4.77667	9.78	12.45	8.07	10.1	--	GO:0042538//hyperosmotic salinity response	-	GO:0009941//chloroplast envelope
CL303.Contig2_DB	2	26.48	24.42	16.27	22.39	7.22	6.27	8.7	7.39667	7.64	15.75	17.43	13.6067	Mediator of RNA polymerase II transcription subunit 4 OS=Arabidopsis thaliana GN=MED4 PE=1 SV=1	GO:0006357//regulation of transcription from RNA polymerase II promoter	GO:0001104//RNA polymerase II transcription cofactor activity	GO:0016592//mediator complex
CL24644.Contig1_DB	2	23.38	22.7	20.81	22.2967	5.22	4.64	7.43	5.76333	12.31	12.24	8.86	11.1367	Myb-related protein P OS=Zea mays GN=P PE=2 SV=1	-	-	-
Unigene41734_DB	2	16.25	34.82	15.64	22.2367	2.48	3.25	5.59	3.77333	6.71	9.86	5.88	7.48333	Vegetative cell wall protein gp1 OS=Chlamydomonas reinhardtii GN=GP1 PE=2 SV=1	-	-	-
Unigene30313_DB	2	30.16	24.16	12.19	22.17	4.39	4.19	8.84	5.80667	10.15	11.98	4.17	8.76667	--	-	-	-
CL2787.Contig2_DB	2	20.74	26.36	19.18	22.0933	7.6	5.87	10.23	7.9	11.77	10.69	11.79	11.4167	--	GO:0006436//tryptophanyl-tRNA aminoacylation	GO:0004830//tryptophan-tRNA ligase activity;GO:0005524//ATP binding	GO:0005737//cytoplasm
Unigene37597_DB	2	19.88	25.48	20.77	22.0433	4.56	4.26	3.92	4.24667	10.4	17.42	16.18	14.6667	--	-	-	-
CL250.Contig5_DB	2	22.07	26.95	16.26	21.76	4.53	2.85	6.85	4.74333	10.93	10.35	5.48	8.92	--	-	-	-
CL23776.Contig1_DB	2	25.01	22.85	17.1	21.6533	5.21	8.19	8.49	7.29667	13.75	11.5	13.87	13.04	Zinc finger CCCH domain-containing protein 25 OS=Oryza sativa subsp. japonica GN=Os03g0826400 PE=2 SV=1	-	GO:0003676//nucleic acid binding	-
CL13550.Contig3_DB	2	13.43	36.6	14.85	21.6267	3.61	0.69	2.52	2.27333	2.65	7.74	6.53	5.64	Protein FANTASTIC FOUR 3 OS=Arabidopsis thaliana GN=FAF3 PE=2 SV=1	-	-	-
CL4572.Contig1_DB	2	23.86	28	12.91	21.59	5.01	3.09	2.8	3.63333	4.19	8.08	5.51	5.92667	GATA transcription factor 16 OS=Arabidopsis thaliana GN=GATA16 PE=2 SV=1	GO:0006355//regulation of transcription, DNA-dependent	GO:0003700//sequence-specific DNA binding transcription factor activity;GO:0043565//sequence-specific DNA binding;GO:0008270//zinc ion binding	-
Unigene25863_DB	2	24	28.72	11.88	21.5333	2.21	5.91	6.19	4.77	7.89	14.26	5.73	9.29333	--	-	-	-
CL6147.Contig1_DB	2	21.11	21.71	21.77	21.53	7.51	6.19	9.42	7.70667	14.6	17.07	8.72	13.4633	Probable indole-3-acetic acid-amido synthetase GH3.12 OS=Oryza sativa subsp. japonica GN=GH3.12 PE=2 SV=1	GO:0009864//induced systemic resistance, jasmonic acid mediated signaling pathway;GO:0009585//red, far-red light phototransduction;GO:0010193//response to ozone;GO:0009694//jasmonic acid metabolic process;GO:0031348//negative regulation of defense response;GO:0009640//photomorphogenesis;GO:0010119//regulation of stomatal movement;GO:0009627//systemic acquired resistance;GO:0009861//jasmonic acid …	GO:0080123//jasmonate-amino synthetase activity;GO:0070566//adenylyltransferase activity	GO:0009507//chloroplast;GO:0005773//vacuole
Unigene37820_DB	2	30.25	17.52	16.4	21.39	6.53	6.15	9.26	7.31333	11.71	12.49	3.65	9.28333	Proline-rich receptor-like protein kinase PERK2 OS=Arabidopsis thaliana GN=PERK2 PE=2 SV=3	GO:0006098//pentose-phosphate shunt;GO:0019288//isopentenyl diphosphate biosynthetic process, mevalonate-independent pathway;GO:0016117//carotenoid biosynthetic process;GO:0010027//thylakoid membrane organization;GO:0000956//nuclear-transcribed mRNA catabolic process;GO:0010020//chloroplast fission	-	GO:0009941//chloroplast envelope;GO:0005794//Golgi apparatus
CL1163.Contig1_DB	2	21.89	26.33	15.7	21.3067	1.13	1.8	3.05	1.99333	7.94	12.92	7.21	9.35667	--	-	-	-
CL859.Contig19_DB	2	10.77	35.49	17.64	21.3	0	3.37	5.63	3	3.79	8.02	4.34	5.38333	--	-	-	-
CL10347.Contig1_DB	2	22.91	18.16	22.77	21.28	7.98	8.45	7.15	7.86	9.5	11.7	8.73	9.97667	--	-	GO:0008270//zinc ion binding;GO:0003676//nucleic acid binding	-
Unigene38583_DB	2	25.69	23.12	14.96	21.2567	6.4	6.15	6.77	6.44	10.11	13.82	3.89	9.27333	Serine/threonine protein phosphatase 2A 59 kDa regulatory subunit B' eta isoform OS=Arabidopsis thaliana GN=B'ETA PE=2 SV=1	GO:0007165//signal transduction	GO:0008601//protein phosphatase type 2A regulator activity	GO:0005730//nucleolus;GO:0005777//peroxisome;GO:0005886//plasma membrane;GO:0000159//protein phosphatase type 2A complex;GO:0000502//proteasome complex;GO:0005829//cytosol;GO:0009536//plastid
Unigene2464_DB	2	20.38	23.65	19.7	21.2433	5.94	2.28	3.44	3.88667	7.67	8.35	7.04	7.68667	--	-	-	-
Unigene1576_DB	2	12.88	32.21	18.58	21.2233	2.6	2.64	6.94	4.06	5.45	8	6.56	6.67	--	-	GO:0005488//binding	GO:0005739//mitochondrion
CL22811.Contig2_DB	2	27.7	22.37	13.08	21.05	4.96	6.85	5.81	5.87333	13.13	11.1	8.64	10.9567	Formin-like protein 5 OS=Oryza sativa subsp. japonica GN=FH5 PE=2 SV=2	-	GO:0046872//metal ion binding	-
CL4580.Contig2_DB	2	20.44	18.65	23.87	20.9867	4.69	4.48	4.74	4.63667	4.61	9.2	5.6	6.47	Formin-like protein 20 OS=Arabidopsis thaliana GN=FH20 PE=2 SV=3	-	-	-
CL8715.Contig2_DB	2	20.66	31.8	10.41	20.9567	5.85	1.32	4.98	4.05	5.79	8.66	5.36	6.60333	Cold shock protein 1 OS=Arabidopsis thaliana GN=CSP1 PE=2 SV=1	-	GO:0003676//nucleic acid binding	GO:0044464//cell part
Unigene40345_DB	2	23.2	25.09	14.43	20.9067	3.23	2.81	6.12	4.05333	8.35	10.12	6.65	8.37333	--	-	-	-
Unigene37052_DB	2	18.93	22.37	21.17	20.8233	4.74	8.41	10.17	7.77333	14.57	12.49	16.04	14.3667	--	-	-	-
CL24029.Contig1_DB	2	24.48	23.78	14.17	20.81	4.23	4.32	4.96	4.50333	5.34	10.75	3.42	6.50333	--	-	-	-
Unigene33825_DB	2	27.06	21	14.26	20.7733	4.02	6.26	10.3	6.86	10.83	10.22	13.92	11.6567	Leucine-rich repeat extensin-like protein 5 OS=Arabidopsis thaliana GN=LRX5 PE=2 SV=2	-	-	-
CL22787.Contig1_DB	2	26.69	18.41	17.17	20.7567	7.91	5.86	9.38	7.71667	15.09	7.67	15	12.5867	Formin-like protein 6 OS=Oryza sativa subsp. japonica GN=FH6 PE=2 SV=2	GO:0006397//mRNA processing	-	GO:0016023//cytoplasmic membrane-bounded vesicle;GO:0005634//nucleus
CL6166.Contig1_DB	2	24.05	19.86	18.12	20.6767	7.21	6.37	7.63	7.07	17.76	13.88	17.63	16.4233	Floral homeotic protein APETALA 2 OS=Arabidopsis thaliana GN=AP2 PE=1 SV=1	-	-	-
Unigene39180_DB	2	18.4	24.22	19.4	20.6733	2.31	4.25	4.38	3.64667	5.25	9.19	5.28	6.57333	--	-	-	-
CL7952.Contig3_DB	2	20.24	19.83	21.79	20.62	5.41	7.53	7.24	6.72667	6.5	14.41	14.11	11.6733	--	-	-	-
CL18217.Contig1_DB	2	23.33	19.54	18.82	20.5633	5.21	4.69	8.88	6.26	9.66	11.66	11.89	11.07	E3 ubiquitin-protein ligase CIP8 OS=Arabidopsis thaliana GN=CIP8 PE=1 SV=1	-	GO:0008270//zinc ion binding	-
CL22009.Contig3_DB	2	19.04	22.86	19.24	20.38	7.52	5.08	9.94	7.51333	12.2	10.07	10.01	10.76	CRC domain-containing protein TSO1 OS=Arabidopsis thaliana GN=TSO1 PE=1 SV=1	-	-	GO:0009536//plastid
CL27923.Contig1_DB	2	17.82	26.99	15.63	20.1467	5.88	6.23	10.55	7.55333	9.94	16.21	11.29	12.48	--	-	-	-
CL24245.Contig1_DB	2	16.83	23.41	19.74	19.9933	5.12	5.66	7.27	6.01667	16.24	13.4	12.06	13.9	BTB/POZ domain-containing protein At5g66560 OS=Arabidopsis thaliana GN=At5g66560 PE=2 SV=2	-	-	GO:0005886//plasma membrane
CL23870.Contig1_DB	2	21.61	15.3	22.88	19.93	7.02	5.85	8.46	7.11	12.23	19.23	9.21	13.5567	Probable 6-phosphogluconolactonase 1 OS=Oryza sativa subsp. indica GN=OsI_011697 PE=3 SV=2	GO:0006098//pentose-phosphate shunt	GO:0017057//6-phosphogluconolactonase activity	-
CL2322.Contig5_DB	2	12.64	33.13	13.81	19.86	4.77	2.94	3.97	3.89333	6.47	9.83	13.69	9.99667	--	-	-	-
CL24486.Contig3_DB	2	15.36	29.27	14.63	19.7533	5.88	3.23	3.34	4.15	12.09	7.09	15.9	11.6933	Protein FD OS=Arabidopsis thaliana GN=FD PE=1 SV=1	-	GO:0003677//DNA binding	-
Unigene31986_DB	2	26.94	21.28	11	19.74	4.83	1.86	3.98	3.55667	12.2	14.44	4.47	10.37	--	-	-	-
CL547.Contig3_DB	2	20.27	24.48	14.21	19.6533	5.21	6.13	8.2	6.51333	13.8	22.17	10.21	15.3933	Probable UDP-arabinopyranose mutase 2 OS=Oryza sativa subsp. japonica GN=UAM2 PE=1 SV=1	GO:0030244//cellulose biosynthetic process;GO:0009651//response to salt stress	GO:0052691//UDP-arabinopyranose mutase activity;GO:0005515//protein binding;GO:0016740//transferase activity	GO:0005794//Golgi apparatus
CL28663.Contig2_DB	2	17.92	25.56	14.98	19.4867	5.13	7.59	4.58	5.76667	13.37	11.22	12.87	12.4867	Serine/arginine-rich splicing factor RSZ22A OS=Arabidopsis thaliana GN=RSZ22A PE=1 SV=1	GO:0044036//cell wall macromolecule metabolic process;GO:0010089//xylem development;GO:0009860//pollen tube growth	GO:0016787//hydrolase activity	GO:0005576//extracellular region
CL6963.Contig1_DB	2	11.87	22.76	23.45	19.36	4.42	1.73	3.81	3.32	13.68	10.44	13.11	12.41	--	-	-	-
Unigene40265_DB	2	22.86	17.78	17.43	19.3567	4.66	3.23	4.3	4.06333	11.05	10.61	10.5	10.72	--	-	-	-
CL10625.Contig1_DB	2	13.89	25.86	18.32	19.3567	3.64	4.24	7.89	5.25667	9.15	8.86	13.88	10.63	Formin-like protein 5 OS=Oryza sativa subsp. japonica GN=FH5 PE=2 SV=2	-	-	-
CL23985.Contig2_DB	2	24.23	21.05	12.74	19.34	1.95	3.71	4.99	3.55	5.47	5.5	8.35	6.44	--	-	-	-
CL1195.Contig3_DB	2	24.52	23.18	10.29	19.33	4.72	7.32	4.32	5.45333	14.74	14.94	4.32	11.3333	DNA mismatch repair protein MSH6 OS=Arabidopsis thaliana GN=MSH6 PE=1 SV=2	-	-	-
CL736.Contig7_DB	2	17.85	21.33	18.64	19.2733	1.39	3.62	6.67	3.89333	7.35	6.21	11.61	8.39	Transcription factor PIF4 OS=Arabidopsis thaliana GN=PIF4 PE=1 SV=1	-	-	-
CL27340.Contig1_DB	2	26.88	19.34	11.5	19.24	4.51	5.47	8.55	6.17667	12.42	13.68	4.96	10.3533	--	-	-	-
CL18459.Contig1_DB	2	27.98	21.39	8.05	19.14	1.25	1.43	2.63	1.77	13.64	5.78	3.45	7.62333	--	-	-	-
CL15051.Contig1_DB	2	20.17	18.91	17.7	18.9267	3.4	5.68	7.38	5.48667	10.87	13.21	17.04	13.7067	E3 ubiquitin-protein ligase RMA1 OS=Arabidopsis thaliana GN=RMA1 PE=1 SV=1	-	GO:0008270//zinc ion binding	-
Unigene38586_DB	2	22.27	16.06	18.02	18.7833	3.97	6.5	7.76	6.07667	9.18	7.52	5.89	7.53	U4/U6 small nuclear ribonucleoprotein PRP4-like protein OS=Arabidopsis thaliana GN=EMB2776 PE=2 SV=1	GO:0000278//mitotic cell cycle;GO:0006312//mitotic recombination;GO:0050826//response to freezing;GO:0007267//cell-cell signaling;GO:0000741//karyogamy;GO:0009793//embryo development ending in seed dormancy;GO:0016579//protein deubiquitination;GO:0016571//histone methylation;GO:0010388//cullin deneddylation;GO:0009640//photomorphogenesis;GO:0009560//embryo sac egg cell differentiation;GO:0019915/…	GO:0004402//histone acetyltransferase activity;GO:0000166//nucleotide binding;GO:0003676//nucleic acid binding	GO:0016607//nuclear speck;GO:0080008//Cul4-RING ubiquitin ligase complex;GO:0005681//spliceosomal complex
CL3526.Contig1_DB	2	15.95	13.97	25.9	18.6067	7.41	3.99	2.5	4.63333	12.1	21.97	7.48	13.85	Beta-glucosidase-like SFR2, chloroplastic OS=Oryza sativa subsp. japonica GN=SFR2 PE=2 SV=1	GO:0005975//carbohydrate metabolic process;GO:0050826//response to freezing	GO:0008422//beta-glucosidase activity	GO:0009707//chloroplast outer membrane;GO:0016023//cytoplasmic membrane-bounded vesicle
CL76.Contig2_DB	2	19.41	21.63	14.67	18.57	3.32	4.02	9.77	5.70333	11.93	11.63	5.71	9.75667	Casein kinase II subunit beta OS=Arabidopsis thaliana GN=CKB1 PE=1 SV=1	GO:0042753//positive regulation of circadian rhythm;GO:0045859//regulation of protein kinase activity;GO:0048573//photoperiodism, flowering	GO:0004674//protein serine/threonine kinase activity;GO:0008134//transcription factor binding;GO:0019887//protein kinase regulator activity	GO:0005956//protein kinase CK2 complex;GO:0005737//cytoplasm;GO:0005634//nucleus
CL14855.Contig1_DB	2	21.56	18.38	15.66	18.5333	4.27	2.77	4.81	3.95	16.08	15.65	10.96	14.23	Serine carboxypeptidase-like 50 OS=Arabidopsis thaliana GN=SCPL50 PE=2 SV=1	GO:0006508//proteolysis	GO:0004185//serine-type carboxypeptidase activity	GO:0016023//cytoplasmic membrane-bounded vesicle;GO:0005773//vacuole
CL2296.Contig2_DB	2	17.17	19.26	18.79	18.4067	4.13	3.78	6.49	4.8	8.69	9.44	5.2	7.77667	Serine/arginine-rich splicing factor RSZ22 OS=Arabidopsis thaliana GN=RSZ22 PE=1 SV=1	GO:0010467//gene expression	GO:0003676//nucleic acid binding	-
CL21935.Contig1_DB	2	8.3	24.98	21.88	18.3867	2.18	0	2.33	1.50333	7.37	6.56	8.38	7.43667	--	-	-	-
CL864.Contig4_DB	2	15.64	24.31	15.13	18.36	2.23	5.17	10.57	5.99	6.29	10.43	9.14	8.62	Pollen-specific protein SF3 OS=Helianthus annuus GN=SF3 PE=2 SV=1	-	GO:0008270//zinc ion binding	-
CL3146.Contig1_DB	2	26.57	19.54	8.83	18.3133	3.98	5.97	5.35	5.1	4.45	7.91	7.77	6.71	Vegetative cell wall protein gp1 OS=Chlamydomonas reinhardtii GN=GP1 PE=2 SV=1	-	-	-
CL2133.Contig2_DB	2	20.6	22.01	12.3	18.3033	4.2	3.76	8.66	5.54	7.01	6.15	9.98	7.71333	Transcription factor VOZ1 OS=Arabidopsis thaliana GN=VOZ1 PE=1 SV=1	-	-	-
CL5279.Contig3_DB	2	13.66	14.69	26.42	18.2567	1.88	0.57	4.61	2.35333	4.32	4.09	3.75	4.05333	--	-	-	-
Unigene30862_DB	2	13	24.81	16.96	18.2567	0.38	1.72	4.73	2.27667	11.36	13.79	9.73	11.6267	CASP-like protein 15 OS=Zea mays PE=2 SV=2	-	-	-
CL5805.Contig4_DB	2	24.58	17.92	12.21	18.2367	3.6	4.5	7.33	5.14333	10.48	14.07	13.7	12.75	Transcriptional corepressor SEUSS OS=Arabidopsis thaliana GN=SEU PE=1 SV=1	GO:0009790//embryo development;GO:0009909//regulation of flower development;GO:0048481//ovule development	GO:0003677//DNA binding;GO:0046982//protein heterodimerization activity	GO:0009536//plastid
Unigene41180_DB	2	20.74	23.32	10.64	18.2333	3.45	0	6.86	3.43667	5.48	7.18	5.55	6.07	--	-	-	-
CL2774.Contig3_DB	2	16.52	24.84	13.19	18.1833	2	1.31	6.58	3.29667	9.36	10.19	6.21	8.58667	Arginine/serine-rich protein 45 OS=Arabidopsis thaliana GN=SR45 PE=1 SV=1	-	-	-
CL12450.Contig2_DB	2	19.88	17.24	17.08	18.0667	4.69	7.65	8.33	6.89	4.51	15.27	10.93	10.2367	Protein PHR1-LIKE 1 OS=Arabidopsis thaliana GN=PHL1 PE=1 SV=1	-	GO:0003677//DNA binding;GO:0003682//chromatin binding	-
CL1034.Contig4_DB	2	23.58	13.35	17.12	18.0167	2.71	6.18	7.35	5.41333	10.89	9.63	8.11	9.54333	Disease resistance protein RGA2 OS=Solanum bulbocastanum GN=RGA2 PE=1 SV=1	-	-	-
CL15532.Contig3_DB	2	15.6	15.12	23.09	17.9367	6.47	6.41	7.33	6.73667	14.02	11.57	8.66	11.4167	--	-	-	-
CL25823.Contig1_DB	2	16.24	22.68	14.73	17.8833	1.09	1.26	5.78	2.71	2.07	15.79	10.81	9.55667	--	-	-	-
CL14523.Contig1_DB	2	22.8	22.25	8.38	17.81	4.14	3.67	5.99	4.6	8.97	8.41	8.07	8.48333	MADS-box transcription factor 58 OS=Oryza sativa subsp. japonica GN=MADS58 PE=2 SV=1	GO:0006351//transcription, DNA-dependent	GO:0005488//binding	-
Unigene5058_DB	2	18.81	14.21	20.24	17.7533	4.89	4.57	5.44	4.96667	9.35	6.01	5.53	6.96333	--	GO:0016192//vesicle-mediated transport;GO:0006886//intracellular protein transport	-	GO:0005634//nucleus;GO:0030131//clathrin adaptor complex
CL9536.Contig3_DB	2	17.21	19.49	16.32	17.6733	2.83	4.23	4.66	3.90667	4.34	5.52	8.28	6.04667	--	-	-	-
CL14477.Contig1_DB	2	17.94	24.34	10.31	17.53	6.1	6.06	5.19	5.78333	6.3	9.43	7.64	7.79	--	-	-	-
CL21434.Contig1_DB	2	18.83	21.33	12.32	17.4933	3.73	3.08	6.01	4.27333	1.9	11.38	4.23	5.83667	--	-	-	-
CL13589.Contig1_DB	2	13.76	22.4	16.09	17.4167	2.36	3.61	3.45	3.14	4.34	5.04	9.21	6.19667	Proline-rich receptor-like protein kinase PERK2 OS=Arabidopsis thaliana GN=PERK2 PE=2 SV=3	-	-	-
CL11299.Contig2_DB	2	18.62	17.61	15.82	17.35	6.62	2.75	6.61	5.32667	6.82	11.61	6.53	8.32	Arginine/serine-rich protein 45 OS=Arabidopsis thaliana GN=SR45 PE=1 SV=1	-	-	GO:0009536//plastid
CL15425.Contig1_DB	2	16.06	19.17	16.76	17.33	3.73	6.38	8.27	6.12667	7.34	9.22	8.43	8.33	Nuclear transcription factor Y subunit C-2 OS=Arabidopsis thaliana GN=NFYC2 PE=2 SV=2	GO:0006355//regulation of transcription, DNA-dependent	GO:0043565//sequence-specific DNA binding;GO:0003700//sequence-specific DNA binding transcription factor activity;GO:0046982//protein heterodimerization activity	GO:0016602//CCAAT-binding factor complex;GO:0005737//cytoplasm
Unigene37081_DB	2	17.57	20.39	13.95	17.3033	0.88	4.62	2.92	2.80667	3.33	6.4	7.72	5.81667	--	-	-	-
CL4971.Contig4_DB	2	15.91	18.87	16.91	17.23	4.02	3.51	5.23	4.25333	8.48	6.55	7.49	7.50667	--	GO:0006629//lipid metabolic process	GO:0004806//triglyceride lipase activity	GO:0005739//mitochondrion
CL22386.Contig2_DB	2	17.27	20.28	13.84	17.13	2.41	1.65	5.25	3.10333	8.18	5.36	7.64	7.06	Formin-like protein 6 OS=Oryza sativa subsp. japonica GN=FH6 PE=2 SV=2	-	GO:0046872//metal ion binding	-
CL5771.Contig1_DB	2	14.72	20.98	15.6	17.1	3.49	6.9	0	3.46333	4.16	5.9	6.43	5.49667	Probable isoaspartyl peptidase/L-asparaginase 3 OS=Arabidopsis thaliana GN=At5g61540 PE=2 SV=1	GO:0033345//asparagine catabolic process via L-aspartate;GO:0006516//glycoprotein catabolic process;GO:0051604//protein maturation	GO:0003948//N4-(beta-N-acetylglucosaminyl)-L-asparaginase activity;GO:0004067//asparaginase activity	GO:0005576//extracellular region
CL5417.Contig3_DB	2	19.52	21.58	9.73	16.9433	2.9	1.66	4.56	3.04	5.02	5.03	7.5	5.85	--	-	-	-
CL12288.Contig5_DB	2	19.23	15.82	15.56	16.87	4.21	6.71	6.96	5.96	11.7	10.75	7.84	10.0967	Cullin-3A OS=Arabidopsis thaliana GN=CUL3A PE=1 SV=1	GO:0006511//ubiquitin-dependent protein catabolic process;GO:0009960//endosperm development;GO:0009911//positive regulation of flower development;GO:0009639//response to red or far red light;GO:0009793//embryo development ending in seed dormancy	GO:0031625//ubiquitin protein ligase binding	GO:0031461//cullin-RING ubiquitin ligase complex
CL16447.Contig1_DB	2	14.57	19.68	16.32	16.8567	2.67	2.56	6.11	3.78	8.44	11.97	9.26	9.89	Arginine/serine-rich protein 45 OS=Arabidopsis thaliana GN=SR45 PE=1 SV=1	-	-	-
CL39.Contig6_DB	2	18.67	19.01	12.82	16.8333	0.53	6.34	2.15	3.00667	5.57	12.27	2.29	6.71	--	-	-	-
CL10929.Contig1_DB	2	16.74	17.36	16.07	16.7233	6.43	5.9	6.27	6.2	15.78	9.96	11.57	12.4367	MND1-interacting protein 1 OS=Arabidopsis thaliana GN=MIP1 PE=1 SV=1	-	GO:0008270//zinc ion binding	-
Unigene41384_DB	2	13.16	21.91	15.06	16.71	1.24	7.58	3.49	4.10333	11.31	6.56	3.6	7.15667	BTB/POZ and MATH domain-containing protein 3 OS=Arabidopsis thaliana GN=BPM3 PE=1 SV=1	GO:0071472//cellular response to salt stress;GO:0031396//regulation of protein ubiquitination	GO:0042802//identical protein binding	GO:0005634//nucleus;GO:0005829//cytosol
CL7596.Contig1_DB	2	11.33	22.74	16.06	16.71	2.4	3.46	3.47	3.11	4.45	9.28	4.55	6.09333	--	-	-	-
CL9615.Contig4_DB	2	11.97	26.25	11.22	16.48	1.67	3.26	3.21	2.71333	10.66	11.77	6.32	9.58333	Arogenate dehydratase/prephenate dehydratase 6, chloroplastic OS=Arabidopsis thaliana GN=ADT6 PE=1 SV=1	GO:0009094//L-phenylalanine biosynthetic process;GO:0080167//response to karrikin	GO:0047769//arogenate dehydratase activity;GO:0004664//prephenate dehydratase activity	GO:0009507//chloroplast
Unigene38581_DB	2	20.85	14.43	14.16	16.48	2.2	3.65	8.13	4.66	8.06	9.49	9.91	9.15333	Serine/threonine protein phosphatase 2A 57 kDa regulatory subunit B' theta isoform OS=Arabidopsis thaliana GN=B'THETA PE=2 SV=2	GO:0007165//signal transduction	GO:0008601//protein phosphatase type 2A regulator activity	GO:0005730//nucleolus;GO:0005777//peroxisome;GO:0005886//plasma membrane;GO:0000159//protein phosphatase type 2A complex;GO:0000502//proteasome complex;GO:0005829//cytosol;GO:0009536//plastid
CL9356.Contig1_DB	2	10.19	17.89	21.13	16.4033	1.45	0	1.79	1.08	0	5.3	7.64	4.31333	--	-	-	-
CL1453.Contig2_DB	2	14.65	19.3	15.08	16.3433	1.4	2.48	6.15	3.34333	2.69	6.86	7.67	5.74	--	-	-	-
CL18596.Contig1_DB	2	17.79	19.11	12	16.3	5.31	2.97	7.12	5.13333	10.49	10.13	5.57	8.73	--	-	-	-
Unigene31373_DB	2	13.44	22.71	12.42	16.19	3.38	3.58	5.79	4.25	11.54	6.92	9.47	9.31	--	-	-	-
CL3091.Contig2_DB	2	16.06	16.02	16.45	16.1767	4.59	1.77	5.36	3.90667	6.24	3.98	5.6	5.27333	Chaperone protein dnaJ 15 OS=Arabidopsis thaliana GN=ATJ15 PE=1 SV=1	GO:0006457//protein folding;GO:0030968//endoplasmic reticulum unfolded protein response	GO:0031072//heat shock protein binding;GO:0051082//unfolded protein binding	GO:0016020//membrane;GO:0005783//endoplasmic reticulum
CL2676.Contig1_DB	2	16.41	18.18	13.82	16.1367	6.04	4.77	5.58	5.46333	10.32	8.6	12.44	10.4533	BTB/POZ domain-containing protein At3g05675 OS=Arabidopsis thaliana GN=At3g05675 PE=2 SV=1	-	-	-
Unigene37707_DB	2	14.72	22.54	10.87	16.0433	2.5	1.95	2.69	2.38	2.12	9.23	6.14	5.83	Formin-like protein 5 OS=Oryza sativa subsp. japonica GN=FH5 PE=2 SV=2	-	-	-
CL13149.Contig2_DB	2	11.06	22.93	13.47	15.82	3.37	0.78	1.08	1.74333	2.59	6.08	5.57	4.74667	DEAD-box ATP-dependent RNA helicase 30 OS=Oryza sativa subsp. japonica GN=Os01g0911100 PE=2 SV=2	-	-	-
CL14407.Contig2_DB	2	14.25	23.1	10.02	15.79	1.39	1.6	4.41	2.46667	4.69	7.4	6.28	6.12333	--	-	-	GO:0009536//plastid
CL8856.Contig2_DB	2	22.36	7.05	17.81	15.74	0	2.72	2.83	1.85	4.78	6.31	3.87	4.98667	Zinc finger CCCH domain-containing protein 31 OS=Oryza sativa subsp. japonica GN=Os04g0665700 PE=2 SV=1	-	GO:0008270//zinc ion binding;GO:0003677//DNA binding;GO:0003723//RNA binding	-
CL27117.Contig1_DB	2	19.2	17.86	9.73	15.5967	3.21	2.98	3.42	3.20333	3.26	9.65	5.38	6.09667	--	-	-	-
CL22516.Contig3_DB	2	14.62	15.05	16.81	15.4933	3.87	2.78	5.3	3.98333	11.27	7.65	8.83	9.25	AT-rich interactive domain-containing protein 2 OS=Arabidopsis thaliana GN=ARID2 PE=2 SV=1	-	-	-
CL16231.Contig1_DB	2	20.33	11.93	13.99	15.4167	2.34	1.91	7.35	3.86667	7.57	9.93	2.77	6.75667	Formin-like protein 18 OS=Oryza sativa subsp. japonica GN=FH18 PE=2 SV=1	-	-	-
CL3640.Contig1_DB	2	17.27	11.28	17.65	15.4	2.35	1.34	1.23	1.64	3.33	4.94	2.43	3.56667	Transcription factor TCP14 OS=Arabidopsis thaliana GN=TCP14 PE=1 SV=1	-	-	-
CL26318.Contig27_DB	2	8.71	22.65	14.62	15.3267	3.64	3.31	3.25	3.4	5.54	5.48	5.79	5.60333	Elongator complex protein 4 OS=Arabidopsis thaliana GN=ELP4 PE=1 SV=1	GO:0006979//response to oxidative stress;GO:0006357//regulation of transcription from RNA polymerase II promoter;GO:0010928//regulation of auxin mediated signaling pathway;GO:0035265//organ growth;GO:2000024//regulation of leaf development;GO:0031538//negative regulation of anthocyanin metabolic process;GO:0071329//cellular response to sucrose stimulus;GO:0009737//response to abscisic acid stimul…	GO:0005515//protein binding	GO:0033588//Elongator holoenzyme complex
Unigene37569_DB	2	16.12	15.35	14.37	15.28	4.31	4.17	3.75	4.07667	7.2	3.35	5.88	5.47667	Vegetative cell wall protein gp1 OS=Chlamydomonas reinhardtii GN=GP1 PE=2 SV=1	-	-	-
CL9621.Contig3_DB	2	24.2	6.36	15.28	15.28	1.32	0	0.69	0.67	7.5	10.7	1.71	6.63667	UDP-glycosyltransferase 72B1 OS=Arabidopsis thaliana GN=UGT72B1 PE=1 SV=1	GO:0006805//xenobiotic metabolic process	GO:0035251//UDP-glucosyltransferase activity	GO:0005739//mitochondrion
CL7898.Contig1_DB	2	6.9	26.25	12.62	15.2567	1.69	3.43	3.2	2.77333	7.21	3.07	11.47	7.25	--	-	-	-
CL3888.Contig2_DB	2	15.63	19.3	10.69	15.2067	2.93	1.83	3.5	2.75333	13.69	11.02	10	11.57	Formin-like protein 20 OS=Arabidopsis thaliana GN=FH20 PE=2 SV=3	-	-	-
CL3133.Contig6_DB	2	20.47	17.65	7.49	15.2033	4.01	5.26	4.39	4.55333	7.02	7.5	5.4	6.64	Proline-rich receptor-like protein kinase PERK9 OS=Arabidopsis thaliana GN=PERK9 PE=2 SV=1	GO:0006139//nucleobase-containing compound metabolic process	GO:1901363;GO:0097159//organic cyclic compound binding;GO:0003824//catalytic activity	GO:0005739//mitochondrion
CL26977.Contig2_DB	2	21.86	6.8	16.36	15.0067	1.95	0.89	5.33	2.72333	10.82	10.07	4.05	8.31333	GATA transcription factor 21 OS=Arabidopsis thaliana GN=GATA21 PE=1 SV=2	-	-	-
CL4407.Contig1_DB	2	13.29	14.56	17.07	14.9733	4.99	3.21	5.88	4.69333	10.6	7.1	9.03	8.91	Formin-like protein 5 OS=Oryza sativa subsp. japonica GN=FH5 PE=2 SV=2	-	-	-
CL15837.Contig1_DB	2	11.39	17.67	15.77	14.9433	3.97	3.23	6.49	4.56333	8.74	10.94	9.44	9.70667	--	-	-	-
CL106.Contig5_DB	2	12.22	19.09	13.52	14.9433	0.62	2.17	4.65	2.48	10.29	10	4.57	8.28667	--	-	-	-
CL5403.Contig1_DB	2	15.08	17.3	12.38	14.92	4.78	3	3.66	3.81333	6.31	8.51	6.11	6.97667	RING-H2 finger protein ATL45 OS=Arabidopsis thaliana GN=ATL45 PE=2 SV=1	-	GO:0046872//metal ion binding	-
CL28256.Contig13_DB	2	12.95	18.31	13.36	14.8733	6.13	3	2.34	3.82333	2.77	6.61	6.77	5.38333	PHD finger protein ALFIN-LIKE 3 OS=Oryza sativa subsp. japonica GN=Os03g0818300 PE=2 SV=1	GO:0016568//chromatin modification;GO:0006355//regulation of transcription, DNA-dependent	GO:0008270//zinc ion binding;GO:0035064//methylated histone residue binding	GO:0005634//nucleus
CL14330.Contig2_DB	2	14.34	12.48	17.76	14.86	3.86	1.77	6.95	4.19333	6.91	9.47	12.75	9.71	Myb-related protein MYBAS2 OS=Oryza sativa subsp. japonica GN=MYBAS2 PE=2 SV=1	GO:0006355//regulation of transcription, DNA-dependent	GO:0003677//DNA binding;GO:0003682//chromatin binding	GO:0005634//nucleus
CL17712.Contig1_DB	2	21.94	15.76	6.52	14.74	1.01	3.09	3.18	2.42667	6.25	5.35	2.55	4.71667	Proline-rich receptor-like protein kinase PERK8 OS=Arabidopsis thaliana GN=PERK8 PE=1 SV=1	-	-	-
CL2322.Contig15_DB	2	17.07	14.89	12.23	14.73	0.89	1.64	5.09	2.54	8.1	7.31	4.09	6.5	--	-	-	-
CL25855.Contig2_DB	2	16.38	10.25	17.55	14.7267	1.59	2.44	5.04	3.02333	8.79	9.9	4.96	7.88333	G-type lectin S-receptor-like serine/threonine-protein kinase At2g19130 OS=Arabidopsis thaliana GN=At2g19130 PE=2 SV=1	GO:0006468//protein phosphorylation;GO:0048544//recognition of pollen	GO:0004674//protein serine/threonine kinase activity;GO:0005524//ATP binding	GO:0016023//cytoplasmic membrane-bounded vesicle
CL12196.Contig1_DB	2	11.73	17.05	15.3	14.6933	5.33	4.41	4.72	4.82	9.47	8.31	8.33	8.70333	Probable LRR receptor-like serine/threonine-protein kinase RKF3 OS=Arabidopsis thaliana GN=RKF3 PE=1 SV=1	GO:0006468//protein phosphorylation	GO:0004702//receptor signaling protein serine/threonine kinase activity;GO:0005524//ATP binding	GO:0005886//plasma membrane;GO:0005576//extracellular region
CL25803.Contig2_DB	2	17.62	13.62	12.83	14.69	4.27	3.98	3.85	4.03333	5.59	5.2	4.96	5.25	Uncharacterized protein At4g15545 OS=Arabidopsis thaliana GN=At4g15545 PE=1 SV=1	-	-	-
CL2847.Contig1_DB	2	13.13	12.18	18.73	14.68	0	1.68	1.22	0.966667	1.53	4.08	5.7	3.77	F-box/kelch-repeat protein At3g61590 OS=Arabidopsis thaliana GN=At3g61590 PE=1 SV=1	GO:0048513//organ development	-	-
CL22493.Contig2_DB	2	17.39	10.38	16.15	14.64	4.44	5.68	5.58	5.23333	8.53	8.18	7.09	7.93333	--	-	-	-
CL1459.Contig2_DB	2	17.21	14.52	12.15	14.6267	4.16	4.72	6.81	5.23	7.43	11.49	10.21	9.71	--	-	-	GO:0016023//cytoplasmic membrane-bounded vesicle;GO:0005739//mitochondrion
CL9613.Contig2_DB	2	13.69	15.95	14.22	14.62	4.24	4.64	6.67	5.18333	6.79	7.34	6.31	6.81333	--	-	-	-
CL25278.Contig1_DB	2	12.93	20.56	10.26	14.5833	1.58	4.37	3.07	3.00667	6.05	7.2	5.79	6.34667	Probable LRR receptor-like serine/threonine-protein kinase At1g05700 OS=Arabidopsis thaliana GN=At1g05700 PE=2 SV=1	GO:0016310//phosphorylation	GO:0004672//protein kinase activity;GO:0000166//nucleotide binding	GO:0016023//cytoplasmic membrane-bounded vesicle;GO:0005739//mitochondrion
CL10756.Contig1_DB	2	15.26	14.84	13.56	14.5533	3.77	3.19	9.16	5.37333	4.14	7.95	8.59	6.89333	E3 ubiquitin-protein ligase UPL4 OS=Arabidopsis thaliana GN=UPL4 PE=1 SV=1	GO:0042787//protein ubiquitination involved in ubiquitin-dependent protein catabolic process	GO:0004842//ubiquitin-protein ligase activity	GO:0005737//cytoplasm;GO:0005634//nucleus
CL5225.Contig2_DB	2	9.67	25.23	8.74	14.5467	3.16	2.43	2.33	2.64	5.39	7.85	5.26	6.16667	Probable peptide/nitrate transporter At1g62200 OS=Arabidopsis thaliana GN=At1g62200 PE=2 SV=1	GO:0006857//oligopeptide transport	GO:0005215//transporter activity	GO:0016020//membrane
CL11928.Contig2_DB	2	18.85	13.65	11.02	14.5067	1.15	1.28	2.18	1.53667	8.1	8.88	6.12	7.7	--	-	-	GO:0016023//cytoplasmic membrane-bounded vesicle
CL9952.Contig1_DB	2	13.95	16.13	13.43	14.5033	2.79	3.73	5.58	4.03333	6.38	5.99	10.15	7.50667	G-type lectin S-receptor-like serine/threonine-protein kinase At2g19130 OS=Arabidopsis thaliana GN=At2g19130 PE=2 SV=1	GO:0006468//protein phosphorylation;GO:0048544//recognition of pollen	GO:0004674//protein serine/threonine kinase activity;GO:0005524//ATP binding	GO:0016023//cytoplasmic membrane-bounded vesicle;GO:0016020//membrane
CL18886.Contig2_DB	2	7.74	18.04	17.28	14.3533	0.89	0	0.94	0.61	10.13	5.32	5.09	6.84667	--	-	-	-
CL22126.Contig2_DB	2	17.18	15.28	10.54	14.3333	3.35	1.85	2.45	2.55	8.61	11.83	6.17	8.87	--	-	-	-
Unigene2522_DB	2	19	14.04	9.91	14.3167	2.08	3.59	1.27	2.31333	6.53	4.49	2.26	4.42667	--	-	-	-
CL4392.Contig1_DB	2	11.62	14.62	16.49	14.2433	3.82	5.2	3.46	4.16	11.22	10.45	6.63	9.43333	Nuclear transcription factor Y subunit A-3 OS=Arabidopsis thaliana GN=NFYA3 PE=2 SV=2	-	-	GO:0005634//nucleus
Unigene37541_DB	2	15.57	11.27	15.28	14.04	1.41	2.78	1.2	1.79667	5.15	6.37	3.49	5.00333	--	-	-	GO:0005634//nucleus
CL22369.Contig2_DB	2	8.6	16.93	16.34	13.9567	3.57	2.51	3.65	3.24333	5.86	13.48	7.17	8.83667	Heavy metal-associated isoprenylated plant protein 26 OS=Arabidopsis thaliana GN=HIPP26 PE=1 SV=1	GO:0030001//metal ion transport	GO:0046872//metal ion binding	GO:0016023//cytoplasmic membrane-bounded vesicle;GO:0005739//mitochondrion
CL16493.Contig3_DB	2	15.94	13.51	12.28	13.91	1.43	1.09	1.74	1.42	3	4.01	6.41	4.47333	--	-	-	-
CL28716.Contig1_DB	2	10.81	17.18	13.69	13.8933	3.19	2.46	2.25	2.63333	6.05	5.31	7.21	6.19	--	-	-	-
CL16921.Contig1_DB	2	18.98	11.91	10.79	13.8933	3.29	2.21	5.47	3.65667	7.96	11.19	7.5	8.88333	UPF0481 protein At3g47200 OS=Arabidopsis thaliana GN=At3g47200 PE=1 SV=1	-	-	-
CL2498.Contig5_DB	2	14.69	15.3	11.45	13.8133	3.2	3.14	2.07	2.80333	6.31	4.11	5.55	5.32333	Vegetative cell wall protein gp1 OS=Chlamydomonas reinhardtii GN=GP1 PE=2 SV=1	-	-	-
CL3050.Contig1_DB	2	15.98	17.45	7.71	13.7133	3.32	1.89	5.78	3.66333	8.01	7.11	3.43	6.18333	--	-	-	-
CL9156.Contig2_DB	2	5.31	20.86	14.75	13.64	1.42	1.63	2.99	2.01333	2.98	7.99	7.36	6.11	--	-	-	-
CL21967.Contig1_DB	2	13.95	14	12.58	13.51	3.74	4.74	6.5	4.99333	7.87	9.53	5.99	7.79667	--	-	-	-
CL24239.Contig2_DB	2	14.34	13.99	11.87	13.4	4.38	4.61	2.69	3.89333	6.06	3.89	5.15	5.03333	--	-	GO:0016874//ligase activity	GO:0009536//plastid
CL3930.Contig3_DB	2	12.07	17.31	10.76	13.38	1.19	1.82	4.12	2.37667	4.3	3.31	3.41	3.67333	--	-	-	-
CL18279.Contig1_DB	2	13.43	11.97	14.61	13.3367	5.06	3.45	5.96	4.82333	9.32	9.81	8.51	9.21333	BTB/POZ domain-containing protein At3g09030 OS=Arabidopsis thaliana GN=At3g09030 PE=2 SV=1	-	-	-
CL14678.Contig1_DB	2	12.42	16.65	10.77	13.28	4.08	4.3	2.95	3.77667	6.32	6.83	9.73	7.62667	L-type lectin-domain containing receptor kinase IX.1 OS=Arabidopsis thaliana GN=LECRK91 PE=2 SV=1	GO:0006468//protein phosphorylation	GO:0005524//ATP binding;GO:0004674//protein serine/threonine kinase activity	GO:0016023//cytoplasmic membrane-bounded vesicle
CL12427.Contig1_DB	2	14.62	14.71	10.31	13.2133	1.03	2.75	4.67	2.81667	5.18	6.8	4.62	5.53333	Formin-like protein 5 OS=Oryza sativa subsp. japonica GN=FH5 PE=2 SV=2	-	-	-
CL4668.Contig3_DB	2	12.56	12.71	14.29	13.1867	3.05	4.03	4.76	3.94667	8.82	9.61	9.29	9.24	Formin-like protein 5 OS=Oryza sativa subsp. japonica GN=FH5 PE=2 SV=2	-	-	-
CL27275.Contig2_DB	2	7.23	26.83	5.31	13.1233	1.14	1.74	1.6	1.49333	4.79	4.15	9.06	6	--	-	-	-
CL9792.Contig1_DB	2	16.03	11.28	11.98	13.0967	4.79	1.79	5.71	4.09667	10.08	5.8	5.79	7.22333	Leucine-rich repeat extensin-like protein 5 OS=Arabidopsis thaliana GN=LRX5 PE=2 SV=2	-	-	-
Unigene43898_DB	2	11.38	19.35	8.42	13.05	0	0.72	1.32	0.68	6.94	4.4	4.38	5.24	Arginine/serine-rich protein 45 OS=Arabidopsis thaliana GN=SR45 PE=1 SV=1	-	GO:0003824//catalytic activity	-
CL14941.Contig2_DB	2	11.16	11.07	16.89	13.04	4.65	3.13	3.38	3.72	17.49	5.44	8.74	10.5567	F-box protein At5g51380 OS=Arabidopsis thaliana GN=At5g51380 PE=2 SV=1	-	-	-
CL3072.Contig1_DB	2	13.4	10.87	14.38	12.8833	3.41	2.14	5.29	3.61333	4.71	5.7	6.73	5.71333	--	-	-	-
CL14729.Contig2_DB	2	18.08	13.52	6.96	12.8533	1.44	0	1.64	1.02667	8.27	7.64	8.35	8.08667	Proline-rich receptor-like protein kinase PERK1 OS=Arabidopsis thaliana GN=PERK1 PE=1 SV=1	-	-	-
CL352.Contig1_DB	2	12.92	15.13	10.37	12.8067	5.02	3.34	2.7	3.68667	8.48	9.56	9.27	9.10333	Transcription factor JUNGBRUNNEN 1 OS=Arabidopsis thaliana GN=JUB1 PE=1 SV=1	-	-	-
CL6092.Contig1_DB	2	12.78	14.4	10.93	12.7033	0.9	1.66	1.51	1.35667	2.11	5.09	3.23	3.47667	Uncharacterized protein At1g51745 OS=Arabidopsis thaliana GN=At1g51745 PE=2 SV=2	-	-	-
CL11629.Contig1_DB	2	14.34	14.3	9.27	12.6367	1.28	1.63	3.62	2.17667	3.37	7.08	3.3	4.58333	--	-	-	-
CL12166.Contig3_DB	2	12.7	9.33	15.63	12.5533	0	0	0	0	3.15	6.6	3.19	4.31333	Pistil-specific extensin-like protein OS=Nicotiana tabacum PE=2 SV=1	-	-	-
CL3292.Contig2_DB	2	10.66	14.76	12.24	12.5533	4.31	3.36	4.13	3.93333	11.31	10.18	9.08	10.19	F-box/kelch-repeat protein OR23 OS=Arabidopsis thaliana GN=OR23 PE=2 SV=1	-	-	-
CL20854.Contig2_DB	2	10.48	15.52	11.59	12.53	4.52	3.6	4.45	4.19	4.1	12.16	9.72	8.66	DNA mismatch repair protein MSH2 OS=Arabidopsis thaliana GN=MSH2 PE=1 SV=1	GO:0006298//mismatch repair;GO:0045005//maintenance of fidelity involved in DNA-dependent DNA replication	GO:0017111//nucleoside-triphosphatase activity;GO:0003684//damaged DNA binding;GO:0030983//mismatched DNA binding;GO:0005524//ATP binding	GO:0009536//plastid;GO:0005634//nucleus
CL12258.Contig1_DB	2	13.15	11.43	12.66	12.4133	3.07	4.85	4.68	4.2	7.43	9.8	11.7	9.64333	Vegetative cell wall protein gp1 OS=Chlamydomonas reinhardtii GN=GP1 PE=2 SV=1	GO:0006457//protein folding;GO:0000413//protein peptidyl-prolyl isomerization;GO:0006979//response to oxidative stress	GO:0003755//peptidyl-prolyl cis-trans isomerase activity	GO:0005737//cytoplasm
CL11280.Contig1_DB	2	17.06	9.78	10.26	12.3667	2.54	0.63	3.6	2.25667	3.96	8.27	4.07	5.43333	--	-	-	-
CL15642.Contig4_DB	2	10.84	16.88	9.27	12.33	1.39	1.44	3.91	2.24667	2.92	6.85	3.44	4.40333	--	-	-	-
CL13970.Contig1_DB	2	12.86	11.31	12.81	12.3267	4.78	3.43	4.6	4.27	6	7.69	6.71	6.8	CHD3-type chromatin-remodeling factor PICKLE OS=Arabidopsis thaliana GN=PKL PE=1 SV=1	GO:0010332//response to gamma radiation;GO:0006281//DNA repair	GO:0003677//DNA binding;GO:0005524//ATP binding;GO:0004386//helicase activity	GO:0016021//integral to membrane;GO:0016023//cytoplasmic membrane-bounded vesicle;GO:0005783//endoplasmic reticulum;GO:0005634//nucleus
CL1849.Contig4_DB	2	10.82	16.21	9.84	12.29	1.4	0.81	0.75	0.986667	5.32	4.2	3.66	4.39333	Formin-like protein 5 OS=Oryza sativa subsp. japonica GN=FH5 PE=2 SV=2	-	-	-
CL14399.Contig2_DB	2	10.43	14.32	12	12.25	3.21	4.8	5.14	4.38333	6.31	7.9	4.95	6.38667	DNA-directed RNA polymerase II subunit RPB1 OS=Arabidopsis thaliana GN=RPB205 PE=1 SV=3	-	GO:0008375//acetylglucosaminyltransferase activity	GO:0016020//membrane;GO:0005739//mitochondrion
CL11657.Contig2_DB	2	10.58	18.72	7.4	12.2333	3.35	0.48	3.49	2.44	4.74	6.2	7.34	6.09333	--	-	-	-
CL5421.Contig1_DB	2	12.87	12.48	11.13	12.16	2.01	2.42	4.66	3.03	3.71	4.31	4.14	4.05333	BTB/POZ domain-containing protein At3g05675 OS=Arabidopsis thaliana GN=At3g05675 PE=2 SV=1	-	-	-
CL26348.Contig1_DB	2	13.07	10.71	12.69	12.1567	3.97	3.67	5.73	4.45667	6.44	5.01	5.24	5.56333	GPI mannosyltransferase 1 OS=Arabidopsis thaliana GN=PIGM PE=2 SV=1	GO:0017148//negative regulation of translation;GO:0051301//cell division;GO:0006506//GPI anchor biosynthetic process;GO:0030244//cellulose biosynthetic process;GO:0009790//embryo development;GO:0009832//plant-type cell wall biogenesis	GO:0048027//mRNA 5'-UTR binding;GO:0010313//phytochrome binding;GO:0051751//alpha-1,4-mannosyltransferase activity;GO:0003677//DNA binding;GO:0004518//nuclease activity	GO:0016023//cytoplasmic membrane-bounded vesicle;GO:0016021//integral to membrane;GO:0005789//endoplasmic reticulum membrane;GO:0005829//cytosol;GO:0005634//nucleus;GO:0005739//mitochondrion
Unigene35444_DB	2	11.76	10.48	14.1	12.1133	4.09	1.89	3.62	3.2	5.71	7.17	3.74	5.54	Protein FAR-RED IMPAIRED RESPONSE 1 OS=Arabidopsis thaliana GN=FAR1 PE=1 SV=1	-	GO:0008270//zinc ion binding;GO:0003676//nucleic acid binding	-
CL21660.Contig2_DB	2	12.44	14.09	9.76	12.0967	2.1	1.2	1.83	1.71	3.08	4.16	5.43	4.22333	Acyl-CoA--sterol O-acyltransferase 1 OS=Arabidopsis thaliana GN=ASAT1 PE=1 SV=1	-	-	GO:0016020//membrane
Unigene4947_DB	2	11.12	16.12	8.95	12.0633	0.82	2.88	0.89	1.53	7.32	9.11	4.33	6.92	Mitogen-activated protein kinase kinase 4 OS=Arabidopsis thaliana GN=MKK4 PE=1 SV=1	GO:0006468//protein phosphorylation	GO:0005524//ATP binding;GO:0004674//protein serine/threonine kinase activity	GO:0005739//mitochondrion
CL1452.Contig3_DB	2	16.91	11.64	7.53	12.0267	2.18	2.28	4.33	2.93	3.9	5.28	5.66	4.94667	Arginine/serine-rich-splicing factor RSP31 OS=Arabidopsis thaliana GN=RSP31 PE=1 SV=2	GO:0035196//production of miRNAs involved in gene silencing by miRNA;GO:0000398//mRNA splicing, via spliceosome;GO:0043687//post-translational protein modification;GO:0030422//production of siRNA involved in RNA interference;GO:0045893//positive regulation of transcription, DNA-dependent	GO:0003723//RNA binding;GO:0000166//nucleotide binding	GO:0005681//spliceosomal complex;GO:0016607//nuclear speck;GO:0005737//cytoplasm
Unigene39547_DB	2	10.1	16.12	9.68	11.9667	0.45	1.03	3.32	1.6	5.67	5.81	5.14	5.54	--	-	-	-
Unigene36347_DB	2	15.12	10.7	9.97	11.93	2.43	2.07	4.42	2.97333	9.41	10.58	6.05	8.68	--	-	-	-
CL5084.Contig3_DB	2	12.19	9.64	13.88	11.9033	2.94	2.13	0	1.69	7.06	15.49	4.42	8.99	DNA-directed RNA polymerase II subunit RPB1 OS=Arabidopsis thaliana GN=RPB205 PE=1 SV=3	-	-	-
CL24591.Contig4_DB	2	14.41	12.36	8.88	11.8833	2.03	1.5	3.19	2.24	6.1	4.77	3.85	4.90667	--	-	-	-
Unigene32667_DB	2	6.6	17.3	11.74	11.88	2.95	2.36	3.71	3.00667	6.32	7.02	4.58	5.97333	SNF1-related protein kinase catalytic subunit alpha KIN10 OS=Arabidopsis thaliana GN=KIN10 PE=1 SV=2	GO:0016310//phosphorylation	GO:0004674//protein serine/threonine kinase activity;GO:0000166//nucleotide binding	-
CL23392.Contig1_DB	2	15.2	12.84	7.48	11.84	0.86	0	0.93	0.596667	7.65	8.66	5.43	7.24667	--	-	-	-
CL23696.Contig1_DB	2	11.53	14.91	8.96	11.8	3.23	2.16	5.94	3.77667	5.98	5.44	4.9	5.44	--	-	-	-
CL22437.Contig1_DB	2	13.62	12.2	9.35	11.7233	3.85	3.31	4.35	3.83667	7.91	8.39	9.12	8.47333	Vegetative cell wall protein gp1 OS=Chlamydomonas reinhardtii GN=GP1 PE=2 SV=1	GO:0006887//exocytosis	-	GO:0000145//exocyst
CL22826.Contig2_DB	2	16.07	7.63	11.42	11.7067	2.17	3.17	4.66	3.33333	3.47	6.01	5.43	4.97	Lysine histidine transporter 2 OS=Arabidopsis thaliana GN=LHT2 PE=1 SV=1	GO:0015801//aromatic amino acid transport;GO:0009624//response to nematode;GO:0015804//neutral amino acid transport	GO:0015175//neutral amino acid transmembrane transporter activity;GO:0015173//aromatic amino acid transmembrane transporter activity	GO:0016021//integral to membrane
CL3694.Contig2_DB	2	9.32	15.52	10.21	11.6833	0.61	3.18	3.99	2.59333	8.34	6.66	5.86	6.95333	--	-	-	-
CL26334.Contig1_DB	2	12.74	11.39	10.85	11.66	3.29	3.74	4.65	3.89333	5.62	5.19	3.39	4.73333	--	GO:0007154//cell communication	GO:0035091//phosphatidylinositol binding	-
CL4416.Contig3_DB	2	14.46	8.81	11.45	11.5733	4.28	4.9	2.25	3.81	5.03	5.37	3.71	4.70333	--	-	-	-
Unigene34788_DB	2	17.55	0	16.88	11.4767	0.68	1.3	0.95	0.976667	15.21	8.34	1.18	8.24333	Very-long-chain 3-oxoacyl-CoA reductase 1 OS=Arabidopsis thaliana GN=KCR1 PE=1 SV=1	GO:0055114//oxidation-reduction process	GO:0016491//oxidoreductase activity;GO:0000166//nucleotide binding	-
CL12641.Contig1_DB	2	8.55	11.65	14.17	11.4567	2.68	3.38	5.41	3.82333	5.42	5.43	4.14	4.99667	--	-	-	-
Unigene42768_DB	2	10.22	15.04	8.94	11.4	1.34	1.05	1.54	1.31	5.96	5.03	6.78	5.92333	--	-	-	-
CL21749.Contig2_DB	2	13.55	12.5	8.13	11.3933	2.01	3.87	2.18	2.68667	4.89	6.77	4.11	5.25667	KH domain-containing protein At4g18375 OS=Arabidopsis thaliana GN=At4g18375 PE=2 SV=1	GO:0009911//positive regulation of flower development	GO:0003723//RNA binding	GO:0005634//nucleus
CL14637.Contig1_DB	2	11.04	9.97	13.14	11.3833	2.11	2.25	4.66	3.00667	6.96	7.29	7.75	7.33333	F-box/LRR-repeat protein 10 OS=Arabidopsis thaliana GN=FBL10 PE=2 SV=1	-	-	GO:0009536//plastid
CL10291.Contig2_DB	2	9.31	15.45	9.31	11.3567	2.32	3.69	4.42	3.47667	15.88	6.07	5.79	9.24667	Transcription factor ATR2 OS=Arabidopsis thaliana GN=ATR2 PE=1 SV=1	-	-	GO:0043231//intracellular membrane-bounded organelle
CL29473.Contig1_DB	2	10.92	11.58	11.4	11.3	1.12	3.78	4.39	3.09667	5.47	4.16	2.79	4.14	Protein argonaute 3 OS=Arabidopsis thaliana GN=AGO3 PE=3 SV=1	-	-	-
CL26510.Contig1_DB	2	11.32	14.91	7.47	11.2333	1.95	1.07	1.08	1.36667	0.94	2.16	4.28	2.46	Formin-like protein 20 OS=Arabidopsis thaliana GN=FH20 PE=2 SV=3	-	-	-
CL15596.Contig2_DB	2	19.31	6.98	7.36	11.2167	0.58	0.51	0.8	0.63	0.9	6.64	3.01	3.51667	Arginine/serine-rich protein 45 OS=Arabidopsis thaliana GN=SR45 PE=1 SV=1	-	GO:0003676//nucleic acid binding;GO:0000166//nucleotide binding	GO:0030529//ribonucleoprotein complex;GO:0005634//nucleus;GO:0009536//plastid
Unigene34388_DB	2	7.6	15.62	10.34	11.1867	2.27	1.56	0	1.27667	3.2	2.8	3.87	3.29	--	-	-	-
CL12891.Contig1_DB	2	12.73	11.66	9.12	11.17	1.51	2.88	2.26	2.21667	5.52	7.03	6.28	6.27667	Transport inhibitor response 1-like protein OS=Arabidopsis thaliana GN=At5g49980 PE=1 SV=1	GO:0009734//auxin mediated signaling pathway	GO:0000822//inositol hexakisphosphate binding	GO:0005739//mitochondrion
CL20248.Contig1_DB	2	14.38	12.69	6.44	11.17	1.58	2.34	3.95	2.62333	8.75	7.03	8.97	8.25	Disease resistance protein RGA2 OS=Solanum bulbocastanum GN=RGA2 PE=1 SV=1	-	-	-
CL7571.Contig3_DB	2	9.03	17.3	7.15	11.16	1.3	0.91	0.93	1.04667	2.64	0.83	4.09	2.52	Glutathione synthetase, chloroplastic OS=Brassica juncea GN=GSH2 PE=2 SV=1	GO:0009753//response to jasmonic acid stimulus;GO:0006750//glutathione biosynthetic process	GO:0004363//glutathione synthase activity;GO:0005524//ATP binding	GO:0005829//cytosol;GO:0009507//chloroplast
CL1907.Contig7_DB	2	10.1	17.82	5.54	11.1533	1.32	1.53	2.12	1.65667	8.63	10.39	0.69	6.57	Protein argonaute 4B OS=Oryza sativa subsp. japonica GN=AGO4B PE=2 SV=1	-	-	-
CL11233.Contig1_DB	2	10.03	13.22	10.11	11.12	1.69	5.26	1.59	2.84667	4.95	5.09	2.89	4.31	--	-	-	-
Unigene5178_DB	2	12.36	11.15	9.81	11.1067	1.39	1.9	1.74	1.67667	5.58	4.94	5.44	5.32	--	-	-	-
CL9042.Contig6_DB	2	11.13	15.54	6.64	11.1033	0.88	2.25	4.36	2.49667	7.04	6.63	2.41	5.36	Leucine-rich repeat extensin-like protein 3 OS=Arabidopsis thaliana GN=LRX3 PE=1 SV=1	-	-	-
Unigene31906_DB	2	8.89	15.33	8.86	11.0267	2.07	3.23	4.85	3.38333	6.82	9.19	10.67	8.89333	Formin-like protein 6 OS=Oryza sativa subsp. japonica GN=FH6 PE=2 SV=2	-	-	-
Unigene41993_DB	2	8.86	15.01	8.96	10.9433	2.41	1.7	3.11	2.40667	7.23	7.2	6.99	7.14	--	-	-	-
CL7124.Contig3_DB	2	8.82	15.48	8.39	10.8967	2.07	3.26	3.41	2.91333	4.77	11.64	4.54	6.98333	--	-	-	-
CL7610.Contig1_DB	2	10	9.79	12.84	10.8767	1.28	0.98	0.45	0.903333	2.69	4.66	9.29	5.54667	--	-	-	-
CL18154.Contig4_DB	2	9.19	11.38	11.77	10.78	3.32	2.04	4.35	3.23667	7.17	5.3	6.82	6.43	--	GO:0001510//RNA methylation;GO:0006396//RNA processing;GO:0016114//terpenoid biosynthetic process;GO:0006995//cellular response to nitrogen starvation	GO:0008173//RNA methyltransferase activity;GO:0003723//RNA binding;GO:0003677//DNA binding;GO:0046983//protein dimerization activity;GO:0003700//sequence-specific DNA binding transcription factor activity	GO:0005739//mitochondrion;GO:0009507//chloroplast
CL18200.Contig3_DB	2	10.05	17.03	4.93	10.67	1.63	1.16	0	0.93	5.92	5.32	7.8	6.34667	--	-	-	-
CL26266.Contig2_DB	2	9.91	15.38	6.72	10.67	2.55	1.56	3.88	2.66333	5.18	6.39	6.07	5.88	F-box protein At5g03970 OS=Arabidopsis thaliana GN=At5g03970 PE=2 SV=1	-	-	-
CL15717.Contig2_DB	2	12.93	8.57	10.04	10.5133	2.99	0.77	1.57	1.77667	3.77	6.67	2.32	4.25333	--	-	-	-
CL17141.Contig1_DB	2	13.75	8.62	9.06	10.4767	1.14	3.59	4.46	3.06333	11.27	6.6	5.59	7.82	Leucine-rich repeat extensin-like protein 5 OS=Arabidopsis thaliana GN=LRX5 PE=2 SV=2	-	-	-
CL843.Contig4_DB	2	6.05	16.48	8.75	10.4267	0	0	0	0	3.99	4.41	3.62	4.00667	--	-	-	-
CL9122.Contig9_DB	2	14.05	11.16	5.85	10.3533	1.05	2.51	4.59	2.71667	3.41	7.14	3.58	4.71	Protein NLP1 OS=Oryza sativa subsp. japonica GN=NLP1 PE=2 SV=1	GO:0006355//regulation of transcription, DNA-dependent	GO:0003677//DNA binding	GO:0005634//nucleus
CL24570.Contig1_DB	2	13.2	9.3	8.37	10.29	0.8	3.08	3.81	2.56333	4.01	4.09	4.93	4.34333	--	GO:0051707//response to other organism;GO:0010033//response to organic substance;GO:0007165//signal transduction;GO:0006952//defense response	-	GO:0005737//cytoplasm
CL18484.Contig2_DB	2	9.92	10.78	9.99	10.23	1	1.52	1.04	1.18667	3.77	5.42	3.78	4.32333	Protein IQ-DOMAIN 14 OS=Arabidopsis thaliana GN=IQD14 PE=1 SV=1	GO:0005975//carbohydrate metabolic process	GO:0004553//hydrolase activity, hydrolyzing O-glycosyl compounds	-
Unigene36145_DB	2	10.98	8.74	10.95	10.2233	2.77	1.45	3.77	2.66333	11.51	8.41	4.17	8.03	--	GO:0031167//rRNA methylation;GO:0051301//cell division;GO:0001708//cell fate specification	GO:0000179//rRNA (adenine-N6,N6-)-dimethyltransferase activity	GO:0005730//nucleolus;GO:0005737//cytoplasm
CL9865.Contig2_DB	2	13.68	10.85	6.03	10.1867	1.23	0.51	2.36	1.36667	2.06	1.64	3.91	2.53667	DEAD-box ATP-dependent RNA helicase 42 OS=Arabidopsis thaliana GN=RH42 PE=1 SV=2	GO:0000398//mRNA splicing, via spliceosome	GO:0003676//nucleic acid binding	GO:0005829//cytosol
CL7133.Contig1_DB	2	12.7	8.52	8.85	10.0233	2.7	2.45	5.05	3.4	5.65	5.85	2.04	4.51333	E3 ubiquitin protein ligase DRIP2 OS=Arabidopsis thaliana GN=DRIP2 PE=1 SV=1	-	GO:0046872//metal ion binding	-
CL15594.Contig1_DB	2	11.58	8.49	9.99	10.02	3.41	0.91	2.35	2.22333	3.9	7.19	8.46	6.51667	E3 ubiquitin-protein ligase ATL15 OS=Arabidopsis thaliana GN=ATL15 PE=1 SV=1	-	-	GO:0016023//cytoplasmic membrane-bounded vesicle
CL7010.Contig2_DB	2	12.55	8.4	9.02	9.99	2.83	2.37	4.02	3.07333	8.04	6.16	4.14	6.11333	U3 small nucleolar RNA-associated protein 18 homolog OS=Arabidopsis thaliana GN=At5g14050 PE=1 SV=1	-	-	-
CL19871.Contig1_DB	2	11.44	6.36	10.21	9.33667	1.51	2.5	2.98	2.33	4.13	4.28	2.54	3.65	--	GO:0000956//nuclear-transcribed mRNA catabolic process;GO:0009755//hormone-mediated signaling pathway;GO:0006486//protein glycosylation;GO:0048825//cotyledon development;GO:0010182//sugar mediated signaling pathway	GO:0003676//nucleic acid binding	GO:0009536//plastid;GO:0005634//nucleus
CL26253.Contig1_DB	2	7.79	4.29	14.06	8.71333	0	0	0	0	2.43	0	4.04	2.15667	Chlorophyll(ide) b reductase NOL, chloroplastic OS=Oryza sativa subsp. japonica GN=NOL PE=1 SV=1	GO:0055114//oxidation-reduction process;GO:0010304//PSII associated light-harvesting complex II catabolic process;GO:0015996//chlorophyll catabolic process	GO:0004090//carbonyl reductase (NADPH) activity;GO:0034256//chlorophyll(ide) b reductase activity;GO:0003677//DNA binding;GO:0005515//protein binding;GO:0000166//nucleotide binding;GO:0003682//chromatin binding	GO:0009507//chloroplast
CL12306.Contig1_DB	2	9.66	5.37	6.42	7.15	0.78	2.49	1.28	1.51667	3.3	1.7	1.81	2.27	Probable pre-mRNA-splicing factor ATP-dependent RNA helicase OS=Arabidopsis thaliana GN=At2g47250 PE=2 SV=1	GO:0009560//embryo sac egg cell differentiation	GO:0003676//nucleic acid binding;GO:0008026//ATP-dependent helicase activity;GO:0005524//ATP binding;GO:0003724//RNA helicase activity	GO:0005829//cytosol;GO:0005730//nucleolus;GO:0009941//chloroplast envelope;GO:0016020//membrane
CL9987.Contig3_DB	2	6.93	11.31	0	6.08	0	0	0	0	5.39	5.19	2.2	4.26	RING-H2 zinc finger protein RHA1a OS=Arabidopsis thaliana GN=RHA1A PE=2 SV=1	-	GO:0008270//zinc ion binding	GO:0016023//cytoplasmic membrane-bounded vesicle
Unigene3882_DB	2	9.52	3.02	5.05	5.86333	0.17	0.99	0.91	0.69	4.39	3.96	2.34	3.56333	Flavin-containing monooxygenase YUCCA9 OS=Arabidopsis thaliana GN=YUC9 PE=2 SV=1	GO:0009851//auxin biosynthetic process;GO:0009742//brassinosteroid mediated signaling pathway;GO:0055114//oxidation-reduction process	GO:0050660//flavin adenine dinucleotide binding;GO:0050661//NADP binding;GO:0004499//N,N-dimethylaniline monooxygenase activity	-
CL10224.Contig2_DB	3	108.8	177.34	196.53	160.89	52.47	37.85	64.99	51.77	64.85	48.61	66.85	60.1033	Alpha/beta-gliadin MM1 OS=Triticum aestivum PE=1 SV=1	-	-	-
CL17170.Contig2_DB	3	14.65	10.29	16.85	13.93	1.85	4.29	0.97	2.37	1.72	3.45	1.53	2.23333	--	GO:0015693//magnesium ion transport	GO:0015095//magnesium ion transmembrane transporter activity	GO:0005886//plasma membrane
Unigene30161_DB	3	20.17	25.09	24.5	23.2533	1.07	5.03	1.16	2.42	4.09	5.41	2.27	3.92333	--	-	-	-
CL6302.Contig3_DB	3	61.09	62.05	65.23	62.79	15.47	17.95	26.01	19.81	20.12	26.19	20.31	22.2067	--	GO:0009911//positive regulation of flower development;GO:0009845//seed germination	GO:0003677//DNA binding;GO:0008270//zinc ion binding	-
CL1432.Contig2_DB	3	22.5	24.56	19.4	22.1533	3.88	8.51	7.24	6.54333	6.43	7.25	5.92	6.53333	Arginyl-tRNA--protein transferase 1 OS=Arabidopsis thaliana GN=ATE1 PE=2 SV=2	GO:0010029//regulation of seed germination;GO:0050994//regulation of lipid catabolic process;GO:0016598//protein arginylation;GO:0009737//response to abscisic acid stimulus;GO:0010150//leaf senescence	GO:0004057//arginyltransferase activity	-
CL6803.Contig2_DB	3	112	103.67	78.31	97.9933	50.06	34.95	32.48	39.1633	39.77	32.2	39.07	37.0133	Zinc transporter 2 OS=Oryza sativa subsp. japonica GN=ZIP2 PE=2 SV=1	GO:0006829//zinc ion transport;GO:0055085//transmembrane transport	GO:0016491//oxidoreductase activity;GO:0005385//zinc ion transmembrane transporter activity	GO:0005886//plasma membrane;GO:0016021//integral to membrane
CL935.Contig3_DB	3	11.33	16.14	12.04	13.17	3.53	2.91	1.97	2.80333	1.85	4.23	3.41	3.16333	--	-	-	-
CL11780.Contig1_DB	3	87.03	73.72	68.05	76.2667	21.74	23.37	38.59	27.9	34.26	41.26	22.71	32.7433	Serine/arginine-rich splicing factor 33 OS=Arabidopsis thaliana GN=SR33 PE=1 SV=1	-	GO:0097159//organic cyclic compound binding;GO:1901363	GO:0044424//intracellular part
Unigene36244_DB	3	63.19	62.28	54.38	59.95	4.76	8.58	5.63	6.32333	6.89	12.23	11.79	10.3033	--	-	-	GO:0005739//mitochondrion
CL25403.Contig1_DB	3	18.82	17.44	22.87	19.71	7.01	8.09	6.76	7.28667	8.02	8.23	9.23	8.49333	Probable LRR receptor-like serine/threonine-protein kinase At5g45780 OS=Arabidopsis thaliana GN=At5g45780 PE=2 SV=1	GO:0006468//protein phosphorylation	GO:0005524//ATP binding;GO:0004674//protein serine/threonine kinase activity	GO:0016023//cytoplasmic membrane-bounded vesicle;GO:0016021//integral to membrane
CL24052.Contig1_DB	3	31.98	26.92	37.05	31.9833	10.88	9.75	12.09	10.9067	13.09	11.63	9.62	11.4467	RanBP2-type zinc finger protein At1g67325 OS=Arabidopsis thaliana GN=At1g67325 PE=1 SV=1	-	GO:0003723//RNA binding;GO:0000166//nucleotide binding;GO:0008270//zinc ion binding	GO:0005622//intracellular
CL5399.Contig1_DB	3	12.21	10.04	9.18	10.4767	1.63	2.63	3.25	2.50333	2.39	3.49	2.52	2.8	Protein pleiotropic regulator PRL2 OS=Arabidopsis thaliana GN=PRL2 PE=2 SV=2	-	-	-
Unigene35032_DB	3	25.57	19.13	23.19	22.63	4.92	5.75	7.06	5.91	2.09	8.26	4.32	4.89	--	-	-	-
Unigene36235_DB	3	36.48	45.81	36.36	39.55	16.29	12.06	10.83	13.06	11.59	14.92	18.41	14.9733	--	-	-	GO:0005777//peroxisome
CL17579.Contig2_DB	3	27.36	24.65	29.31	27.1067	10.29	11.48	14.46	12.0767	11.69	12.73	9.8	11.4067	MATH domain-containing protein At5g43560 OS=Arabidopsis thaliana GN=At5g43560 PE=1 SV=1	-	-	-
CL17940.Contig4_DB	3	22.94	24.3	18.47	21.9033	3.58	3.14	6.84	4.52	5.98	7.12	5.4	6.16667	--	-	-	-
CL8772.Contig4_DB	3	71.77	52.35	62.9	62.34	10.51	16.66	18.4	15.19	20.5	21.72	15.9	19.3733	Inactive poly [ADP-ribose] polymerase RCD1 OS=Arabidopsis thaliana GN=RCD1 PE=1 SV=1	-	GO:0003950//NAD+ ADP-ribosyltransferase activity	-
Unigene1447_DB	3	34.93	29.85	38.2	34.3267	6.32	5.82	7.52	6.55333	5.5	12.11	5.09	7.56667	SURP and G-patch domain-containing protein 1-like protein OS=Arabidopsis thaliana GN=At3g52120 PE=2 SV=1	-	GO:0008270//zinc ion binding;GO:0003676//nucleic acid binding	GO:0005622//intracellular
CL978.Contig17_DB	3	49.08	41.38	32.76	41.0733	11.81	17.54	18.19	15.8467	17.94	15.94	17.46	17.1133	--	GO:0006397//mRNA processing	GO:0003723//RNA binding;GO:0000166//nucleotide binding	GO:0005634//nucleus
CL8576.Contig1_DB	3	74.42	70.68	73.25	72.7833	20.37	23.1	36.06	26.51	29.69	29.25	29.34	29.4267	Chaperone protein dnaJ 13 OS=Arabidopsis thaliana GN=ATJ13 PE=1 SV=2	GO:0006457//protein folding	GO:0003677//DNA binding;GO:0003682//chromatin binding	GO:0005634//nucleus
CL506.Contig1_DB	3	18.84	14.47	15.51	16.2733	5.16	6.1	9.09	6.78333	8.48	7.05	4.09	6.54	--	-	-	-
CL17112.Contig1_DB	3	42.87	31.36	34.33	36.1867	8.71	7.49	12.78	9.66	10.16	12.87	11.01	11.3467	Pollen-specific leucine-rich repeat extensin-like protein 1 OS=Arabidopsis thaliana GN=PEX1 PE=2 SV=1	-	-	GO:0005634//nucleus;GO:0005829//cytosol
Unigene26912_DB	3	17.08	16.33	5.06	12.8233	2.08	1.8	3.31	2.39667	5.27	4.15	0	3.14	--	-	-	-
CL26546.Contig2_DB	3	15.98	13.42	18.24	15.88	2.63	2.11	1.36	2.03333	2.33	4.03	3.85	3.40333	--	-	-	-
CL8108.Contig1_DB	3	75.86	54.49	67.81	66.0533	18.05	21.96	26.86	22.29	22.65	30.59	16.31	23.1833	Sulfated surface glycoprotein 185 OS=Volvox carteri PE=1 SV=1	-	-	-
CL12733.Contig3_DB	3	23.24	24.76	26.34	24.78	5.46	6.56	9.57	7.19667	7.21	6.6	7.74	7.18333	--	-	-	GO:0009536//plastid
CL10589.Contig1_DB	3	39.45	34.23	27.93	33.87	4.58	8.37	7.15	6.7	9.48	9.55	5.88	8.30333	Protein DEHYDRATION-INDUCED 19 homolog 2 OS=Oryza sativa subsp. japonica GN=DI19-2 PE=2 SV=2	-	GO:0008270//zinc ion binding	GO:0005622//intracellular
CL3003.Contig2_DB	3	31.93	44.65	30.99	35.8567	7.35	8.69	15.36	10.4667	14.87	12.99	8.41	12.09	--	GO:0016567//protein ubiquitination	GO:0004842//ubiquitin-protein ligase activity;GO:0008270//zinc ion binding	-
Unigene4561_DB	3	15.94	18.32	16.7	16.9867	1.69	2.99	3.91	2.86333	3.54	4.82	2.13	3.49667	Early nodulin-20 OS=Medicago truncatula GN=ENOD20 PE=3 SV=1	-	-	GO:0005739//mitochondrion
CL3207.Contig1_DB	3	114.76	125.78	96.07	112.203	29.23	24.06	30.23	27.84	30.05	41.72	17	29.59	Auxin-responsive protein IAA1 OS=Oryza sativa subsp. japonica GN=IAA1 PE=2 SV=1	GO:0006417//regulation of translation;GO:0006355//regulation of transcription, DNA-dependent;GO:0009734//auxin mediated signaling pathway	GO:0046983//protein dimerization activity	GO:0009536//plastid;GO:0005634//nucleus
CL4797.Contig1_DB	3	113.01	110.1	117.94	113.683	75.41	85.75	98.14	86.4333	22.91	39.53	27.33	29.9233	Inactive beta-amylase 9 OS=Arabidopsis thaliana GN=BAM9 PE=2 SV=1	GO:0008152//metabolic process	GO:0016787//hydrolase activity	GO:0009536//plastid
Unigene35355_DB	3	84.75	74.59	70.07	76.47	32.56	17.83	23.39	24.5933	17.63	44.68	26.72	29.6767	--	-	-	-
CL23191.Contig2_DB	3	19.99	18.28	20.29	19.52	5.67	6.48	7.06	6.40333	5.44	8.82	6.42	6.89333	Serine/threonine-protein kinase PBS1 OS=Arabidopsis thaliana GN=PBS1 PE=1 SV=1	GO:0006468//protein phosphorylation	GO:0005524//ATP binding;GO:0004674//protein serine/threonine kinase activity	GO:0005886//plasma membrane
CL17611.Contig1_DB	3	52.77	49.39	63.9	55.3533	7.44	13.08	8.26	9.59333	13.64	16.38	4.47	11.4967	--	-	-	-
CL2664.Contig1_DB	3	112.04	87.66	113	104.233	36.1	32.69	42.77	37.1867	42.62	43.12	32.9	39.5467	Splicing factor U2af large subunit B OS=Oryza sativa subsp. japonica GN=U2AF65B PE=2 SV=2	GO:0006396//RNA processing	-	GO:0005634//nucleus
CL1995.Contig1_DB	3	16.1	18.03	21.02	18.3833	7.77	5.31	7.53	6.87	4.69	6.08	7.5	6.09	Probable S-acyltransferase At5g04270 OS=Arabidopsis thaliana GN=At5g04270 PE=2 SV=1	-	GO:0008270//zinc ion binding	GO:0005576//extracellular region
CL4118.Contig1_DB	3	24.25	18.81	27.36	23.4733	6.8	7.4	8.32	7.50667	8.18	10.99	4.54	7.90333	--	-	-	-
CL27490.Contig1_DB	3	15.19	19.14	17.56	17.2967	4.38	4.42	10.35	6.38333	7.79	7.91	4.88	6.86	F-box/LRR-repeat protein At1g67190 OS=Arabidopsis thaliana GN=At1g67190 PE=2 SV=1	-	-	GO:0005634//nucleus
CL13714.Contig3_DB	3	14.2	12.31	11.63	12.7133	2.78	2.01	3.69	2.82667	4.97	3.73	2.21	3.63667	--	-	-	-
Unigene5442_DB	3	12.27	10.91	15.41	12.8633	4.55	4.12	5.97	4.88	4.94	5.84	4.93	5.23667	Telomere repeat-binding factor 1 OS=Arabidopsis thaliana GN=TRB1 PE=1 SV=1	GO:0009753//response to jasmonic acid stimulus;GO:0009739//response to gibberellin stimulus;GO:0009651//response to salt stress;GO:0009751//response to salicylic acid stimulus;GO:0009733//response to auxin stimulus;GO:0009737//response to abscisic acid stimulus;GO:0006334//nucleosome assembly;GO:0009723//response to ethylene stimulus;GO:0046686//response to cadmium ion	GO:0003691//double-stranded telomeric DNA binding;GO:0043047//single-stranded telomeric DNA binding;GO:0042803//protein homodimerization activity;GO:0003682//chromatin binding	GO:0000786//nucleosome;GO:0005634//nucleus;GO:0005886//plasma membrane
Unigene4518_DB	3	33.61	23.63	20.26	25.8333	7.89	6.38	10.2	8.15667	7.05	13.14	6.68	8.95667	Formin-like protein 14 OS=Arabidopsis thaliana GN=FH14 PE=3 SV=3	-	-	-
Unigene37767_DB	3	13.92	14.57	16.33	14.94	5.51	6.27	6.88	6.22	5.77	5.08	6.25	5.7	--	-	GO:0016757//transferase activity, transferring glycosyl groups	GO:0005634//nucleus;GO:0009536//plastid
CL5082.Contig2_DB	3	12.67	12.66	12.68	12.67	4.64	4.56	5.24	4.81333	3.37	5.28	4.67	4.44	Ultraviolet-B receptor UVR8 OS=Arabidopsis thaliana GN=UVR8 PE=1 SV=1	-	GO:0046872//metal ion binding	-
CL23252.Contig1_DB	3	139.11	137.09	119.1	131.767	34.64	36.19	57.48	42.77	48.66	56.33	38.37	47.7867	Calcium-dependent protein kinase 34 OS=Arabidopsis thaliana GN=CPK34 PE=2 SV=1	GO:0046777//protein autophosphorylation	GO:0005524//ATP binding;GO:0004674//protein serine/threonine kinase activity	-
CL4483.Contig1_DB	3	27.19	30.95	29.21	29.1167	10.31	6.47	13.5	10.0933	8.1	15.56	9.58	11.08	Protein transport protein Sec24-like At4g32640 OS=Arabidopsis thaliana GN=At4g32640 PE=1 SV=3	-	GO:0005509//calcium ion binding	-
CL2181.Contig8_DB	3	25.97	26.95	21.46	24.7933	0	10.99	5.94	5.64333	2.71	8.48	8.96	6.71667	Flavin-containing monooxygenase FMO GS-OX-like 2 OS=Arabidopsis thaliana GN=At1g12200 PE=2 SV=1	GO:0055114//oxidation-reduction process;GO:0033506//glucosinolate biosynthetic process from homomethionine;GO:0050832//defense response to fungus	GO:0080106//7-methylthiopropyl glucosinolate S-oxygenase activity;GO:0080104//5-methylthiopropyl glucosinolate S-oxygenase activity;GO:0080107//8-methylthiopropyl glucosinolate S-oxygenase activity;GO:0080102//3-methylthiopropyl glucosinolate S-oxygenase activity;GO:0080105//6-methylthiopropyl glucosinolate S-oxygenase activity;GO:0050660//flavin adenine dinucleotide binding;GO:0050661//NADP bind…	GO:0009536//plastid;GO:0005773//vacuole;GO:0005634//nucleus
CL12213.Contig2_DB	3	7.93	11.18	12.08	10.3967	2.22	2.26	2.34	2.27333	2.33	5.33	1.11	2.92333	--	-	GO:0005515//protein binding	-
CL7720.Contig1_DB	3	16.5	12.35	12.16	13.67	4.58	6.12	3.73	4.81	3.75	4.13	4.93	4.27	Probable E3 ubiquitin-protein ligase LUL4 OS=Arabidopsis thaliana GN=LUL4 PE=2 SV=1	-	GO:0008270//zinc ion binding;GO:0016881//acid-amino acid ligase activity	-
CL52.Contig2_DB	3	10.02	10.67	12.36	11.0167	3.43	3.59	6.83	4.61667	5.59	5.48	2.47	4.51333	Homeobox protein LUMINIDEPENDENS OS=Arabidopsis thaliana GN=LD PE=1 SV=2	GO:0006355//regulation of transcription, DNA-dependent	GO:0043565//sequence-specific DNA binding;GO:0003700//sequence-specific DNA binding transcription factor activity	GO:0005634//nucleus
CL12971.Contig1_DB	3	32.56	29.29	39.74	33.8633	7.43	14.13	14.14	11.9	12.87	14.25	9.17	12.0967	Cold shock protein 1 OS=Arabidopsis thaliana GN=CSP1 PE=2 SV=1	-	GO:0008270//zinc ion binding;GO:0003676//nucleic acid binding	-
Unigene5507_DB	3	41.02	40.1	46.06	42.3933	29.27	34.81	43.17	35.75	13.25	18.86	14.6	15.57	Katanin p60 ATPase-containing subunit A1 OS=Arabidopsis thaliana GN=AAA1 PE=1 SV=1	GO:0009630//gravitropism	GO:0016887//ATPase activity;GO:0005524//ATP binding	-
CL845.Contig9_DB	3	20.21	21.89	13.2	18.4333	1.91	3.63	1.88	2.47333	4.18	5.96	1.55	3.89667	--	-	-	-
CL17197.Contig1_DB	3	21.74	21.86	25.98	23.1933	6.65	8.47	11.69	8.93667	9.37	10.56	8.8	9.57667	Probable ubiquitin-conjugating enzyme E2 26 OS=Arabidopsis thaliana GN=UBC26 PE=2 SV=2	-	GO:0016881//acid-amino acid ligase activity	-
CL13240.Contig1_DB	3	13.15	14	5.8	10.9833	1.04	1.49	2.66	1.73	1.94	1.93	4.19	2.68667	--	-	-	-
CL27336.Contig1_DB	3	27.11	23.73	22.94	24.5933	6.42	12.54	14.34	11.1	9.91	11.62	9.55	10.36	Uncharacterized protein At1g51745 OS=Arabidopsis thaliana GN=At1g51745 PE=2 SV=2	-	-	-
Unigene36216_DB	3	16.23	10.67	9.34	12.08	1.78	2.93	3.72	2.81	2.74	5.09	1.02	2.95	F-box protein At5g07610 OS=Arabidopsis thaliana GN=At5g07610 PE=2 SV=1	-	-	-
CL26324.Contig1_DB	3	12.04	11.48	16.22	13.2467	4.51	5.15	2.69	4.11667	5.37	2.59	3.75	3.90333	Ubiquitin carboxyl-terminal hydrolase 23 OS=Arabidopsis thaliana GN=UBP23 PE=2 SV=2	GO:0006508//proteolysis	GO:0008233//peptidase activity	-
CL12055.Contig1_DB	3	13.4	16.29	13.91	14.5333	5.93	3.86	2.08	3.95667	5.34	7.56	1.23	4.71	Zinc finger CCCH domain-containing protein 18 OS=Oryza sativa subsp. japonica GN=Os02g0793000 PE=2 SV=1	-	GO:0003677//DNA binding;GO:0008270//zinc ion binding	GO:0005622//intracellular
CL537.Contig1_DB	3	23.67	11.71	9.66	15.0133	2.47	2.63	5.19	3.43	2.13	7.83	2.75	4.23667	--	-	-	-
CL3675.Contig1_DB	3	18.17	10.77	11.6	13.5133	4.37	3.36	4.53	4.08667	5.31	3.75	3.04	4.03333	Protein BRASSINOSTEROID INSENSITIVE 1 OS=Arabidopsis thaliana GN=BRI1 PE=1 SV=1	-	-	-
CL845.Contig12_DB	3	20.17	12.85	13.45	15.49	1.9	0.43	3.69	2.00667	4.54	1.4	0.81	2.25	--	-	-	-
CL8577.Contig1_DB	3	27.81	30.07	26.33	28.07	7.01	14.34	16.83	12.7267	12.13	13.52	9.46	11.7033	--	-	-	-
Unigene40331_DB	3	13.74	12.82	11.59	12.7167	2.07	2.36	5.04	3.15667	2.89	5.46	3.09	3.81333	E3 ubiquitin-protein ligase SINA-like 11 OS=Arabidopsis thaliana GN=At5g62800 PE=2 SV=2	-	-	GO:0005622//intracellular
CL26393.Contig1_DB	3	27.15	38.51	24.45	30.0367	3.18	8.17	1.9	4.41667	7.82	5.36	3.6	5.59333	--	-	-	-
CL24669.Contig2_DB	3	153.53	147.12	132.38	144.343	41.58	28.9	54.3	41.5933	33.33	50.56	26.18	36.69	Abscisic acid receptor PYL9 OS=Arabidopsis thaliana GN=PYL9 PE=1 SV=1	GO:0006950//response to stress;GO:0009789//positive regulation of abscisic acid mediated signaling pathway	GO:0010427//abscisic acid binding	GO:0005634//nucleus
CL1930.Contig2_DB	3	13.84	8.01	15.45	12.4333	3.22	1.96	6.41	3.86333	2.11	4.61	4.52	3.74667	--	-	-	-
CL7813.Contig1_DB	3	4.36	14.54	12.28	10.3933	3.04	1.92	3.61	2.85667	3.57	2.15	3.14	2.95333	Chloride channel protein CLC-e OS=Arabidopsis thaliana GN=CLC-E PE=2 SV=2	GO:0055085//transmembrane transport;GO:0010103//stomatal complex morphogenesis;GO:0006821//chloride transport;GO:0008152//metabolic process	GO:0005247//voltage-gated chloride channel activity;GO:0003824//catalytic activity	GO:0016021//integral to membrane;GO:0016023//cytoplasmic membrane-bounded vesicle;GO:0009535//chloroplast thylakoid membrane
Unigene3720_DB	3	12.26	10.92	7.39	10.19	2.61	2.41	3.72	2.91333	0.79	3.13	2.42	2.11333	Probable calcium-binding protein CML22 OS=Arabidopsis thaliana GN=CML22 PE=3 SV=1	GO:0006312//mitotic recombination;GO:0009560//embryo sac egg cell differentiation;GO:0016070//RNA metabolic process	GO:0003677//DNA binding;GO:0003723//RNA binding	GO:0016023//cytoplasmic membrane-bounded vesicle
Unigene5138_DB	3	16.99	21.57	21.63	20.0633	3.1	2.13	6.49	3.90667	4.29	6.45	4.17	4.97	Auxin response factor 18 OS=Oryza sativa subsp. japonica GN=ARF18 PE=2 SV=1	GO:0009987//cellular process;GO:0044699	-	-
CL3732.Contig4_DB	3	95.7	66.02	82.62	81.4467	31.32	37.52	35.98	34.94	25.25	36.74	25.23	29.0733	Splicing factor U2af large subunit A OS=Oryza sativa subsp. japonica GN=U2AF65A PE=2 SV=2	GO:0009651//response to salt stress	-	-
CL872.Contig1_DB	3	20.1	12.03	22.34	18.1567	4.24	7.66	4.87	5.59	5.72	11.55	2.63	6.63333	--	-	-	-
CL6680.Contig1_DB	3	20.9	17.82	18.73	19.15	5.87	11	11.79	9.55333	7.23	8.39	8.03	7.88333	AP-1 complex subunit gamma-2 OS=Arabidopsis thaliana GN=At1g60070 PE=2 SV=2	GO:0016192//vesicle-mediated transport;GO:0006886//intracellular protein transport	GO:0008565//protein transporter activity	GO:0044431//Golgi apparatus part;GO:0030131//clathrin adaptor complex
CL18252.Contig1_DB	3	70.96	71.86	72.6	71.8067	17.89	22.56	38.3	26.25	23.69	37	17.23	25.9733	DeSI-like protein At4g17486 OS=Arabidopsis thaliana GN=At4g17486 PE=2 SV=1	-	-	-
CL11694.Contig1_DB	3	69.75	108.29	71.7	83.2467	14.55	21.77	19.49	18.6033	21.17	18.13	12.84	17.38	Probable galacturonosyltransferase 6 OS=Arabidopsis thaliana GN=GAUT6 PE=2 SV=1	GO:0016051//carbohydrate biosynthetic process	GO:0047262//polygalacturonate 4-alpha-galacturonosyltransferase activity	GO:0005794//Golgi apparatus
CL12965.Contig3_DB	3	493.36	256.68	190.58	313.54	57.9	87.99	114.46	86.7833	96.02	127.97	62.12	95.37	Probable CCR4-associated factor 1 homolog 7 OS=Arabidopsis thaliana GN=CAF1-7 PE=2 SV=2	-	GO:0003676//nucleic acid binding	GO:0005634//nucleus
CL5299.Contig1_DB	3	265.42	331.5	340.18	312.367	177.12	268.37	274.7	240.063	79.62	66.9	67.61	71.3767	Tonoplast dicarboxylate transporter OS=Arabidopsis thaliana GN=TDT PE=2 SV=2	GO:0071423//malate transmembrane transport;GO:0006814//sodium ion transport	GO:0015140//malate transmembrane transporter activity	GO:0005773//vacuole;GO:0016020//membrane
CL22793.Contig1_DB	3	57.99	67.89	43.13	56.3367	12.32	7.8	17.24	12.4533	12.82	16.08	19.04	15.98	Guanine nucleotide-binding protein subunit gamma 2 OS=Arabidopsis thaliana GN=GG2 PE=1 SV=1	GO:0010540//basipetal auxin transport;GO:0009845//seed germination;GO:0018342//protein prenylation;GO:0018345//protein palmitoylation;GO:0009817//defense response to fungus, incompatible interaction;GO:0048527//lateral root development;GO:0007186//G-protein coupled receptor signaling pathway	GO:0004871//signal transducer activity;GO:0005515//protein binding	GO:0005834//heterotrimeric G-protein complex;GO:0005634//nucleus
CL10074.Contig2_DB	3	26.88	15.85	15.59	19.44	2.58	2.36	9.95	4.96333	3.43	2.05	5.66	3.71333	--	GO:0019243//methylglyoxal catabolic process to D-lactate;GO:0019375//galactolipid biosynthetic process;GO:0042631//cellular response to water deprivation;GO:0015824//proline transport;GO:0016036//cellular response to phosphate starvation	-	GO:0005739//mitochondrion
Unigene35680_DB	3	24.22	15.6	17.7	19.1733	13.37	14.94	19.92	16.0767	6.8	7.04	8.23	7.35667	--	-	-	-
CL1721.Contig2_DB	3	43.66	25.88	25.92	31.82	5.31	5.81	8.86	6.66	5.65	13.29	7.16	8.7	--	-	-	-
Unigene36344_DB	3	22.6	25.54	22.11	23.4167	4.32	4.56	11.83	6.90333	4.6	11.84	6.53	7.65667	--	-	-	-
CL18101.Contig1_DB	3	36.77	33.51	24.53	31.6033	13.68	8.09	20.5	14.09	11.5	11.53	15.06	12.6967	Serine/threonine-protein kinase BIK1 OS=Arabidopsis thaliana GN=BIK1 PE=1 SV=1	GO:0006865//amino acid transport;GO:0010363//regulation of plant-type hypersensitive response;GO:0002679//respiratory burst involved in defense response;GO:0010200//response to chitin;GO:0006612//protein targeting to membrane;GO:0050832//defense response to fungus;GO:0043069//negative regulation of programmed cell death;GO:0046777//protein autophosphorylation;GO:0052033//pathogen-associated molec…	GO:0004674//protein serine/threonine kinase activity;GO:0005524//ATP binding	GO:0009507//chloroplast;GO:0005730//nucleolus;GO:0005886//plasma membrane
CL4794.Contig6_DB	3	57.25	57.77	47.18	54.0667	3.54	6.89	14.11	8.18	10.71	12.64	12.1	11.8167	--	-	-	-
CL13285.Contig3_DB	3	38.72	42.03	30.92	37.2233	4.09	7.74	10.02	7.28333	4.06	9.57	6.87	6.83333	F-box protein SKIP5 OS=Arabidopsis thaliana GN=SKIP5 PE=1 SV=1	-	-	GO:0005739//mitochondrion
CL6777.Contig2_DB	3	22.14	26.67	36.71	28.5067	5.77	7.23	17.4	10.1333	7.73	15.23	7.73	10.23	Vegetative cell wall protein gp1 OS=Chlamydomonas reinhardtii GN=GP1 PE=2 SV=1	-	-	-
CL26515.Contig1_DB	3	16.41	16.71	19.93	17.6833	4.56	4.73	3.11	4.13333	6.38	3.72	3.08	4.39333	Primary amine oxidase OS=Pisum sativum PE=1 SV=1	GO:0009308//amine metabolic process;GO:0055114//oxidation-reduction process	GO:0008131//primary amine oxidase activity;GO:0005507//copper ion binding;GO:0048038//quinone binding	GO:0016023//cytoplasmic membrane-bounded vesicle;GO:0005618//cell wall
Unigene43549_DB	3	11.84	12.5	9.19	11.1767	4.99	5.59	2.74	4.44	2.38	4.04	2.53	2.98333	Phosphoenolpyruvate carboxykinase [ATP] OS=Zea mays PE=2 SV=1	GO:0016310//phosphorylation;GO:0009817//defense response to fungus, incompatible interaction;GO:0006094//gluconeogenesis;GO:0046686//response to cadmium ion;GO:0016036//cellular response to phosphate starvation	GO:0004612//phosphoenolpyruvate carboxykinase (ATP) activity;GO:0005524//ATP binding;GO:0016301//kinase activity	GO:0005829//cytosol;GO:0005730//nucleolus;GO:0016020//membrane
Unigene32941_DB	3	74.88	93.85	79.19	82.64	7.36	16.18	27.85	17.13	14.06	26.95	11.66	17.5567	--	-	-	-
Unigene4624_DB	3	17.04	18.5	17.98	17.84	3.85	3.44	4.96	4.08333	3.24	5.53	3.11	3.96	--	-	-	-
Unigene41695_DB	3	14.41	9.04	9.28	10.91	3.09	2.12	3.55	2.92	2.72	3.67	2.23	2.87333	--	-	-	-
CL2325.Contig2_DB	3	46.63	26.78	36.47	36.6267	4.64	15.84	15.52	12	10.66	22.77	6.78	13.4033	--	-	-	-
CL22582.Contig2_DB	3	36.3	34.24	33.1	34.5467	11.69	13.37	21.22	15.4267	15.42	15.44	12.43	14.43	SWI/SNF complex subunit SWI3C OS=Arabidopsis thaliana GN=SWI3C PE=1 SV=1	-	GO:0003677//DNA binding;GO:0008270//zinc ion binding;GO:0003682//chromatin binding	GO:0005634//nucleus;GO:0009536//plastid
CL14738.Contig1_DB	3	44.24	40.51	34.55	39.7667	13.09	21.9	17.23	17.4067	15.58	16.02	15.05	15.55	MATH domain-containing protein At5g43560 OS=Arabidopsis thaliana GN=At5g43560 PE=1 SV=1	-	-	GO:0009536//plastid
Unigene35012_DB	3	767.31	1161.68	906.03	945.007	299.03	292.85	309.02	300.3	313.29	287.1	308	302.797	Geraniol 8-hydroxylase OS=Swertia mussotii GN=CYP76B10 PE=1 SV=1	GO:0055114//oxidation-reduction process	GO:0009055//electron carrier activity;GO:0004497//monooxygenase activity;GO:0005506//iron ion binding;GO:0020037//heme binding;GO:0016705//oxidoreductase activity, acting on paired donors, with incorporation or reduction of molecular oxygen	GO:0005886//plasma membrane;GO:0005618//cell wall;GO:0005739//mitochondrion
Unigene616_DB	3	9.94	12.21	14.43	12.1933	0	3.2	2.57	1.92333	2.56	2.37	3.8	2.91	--	-	-	-
CL375.Contig1_DB	3	147.61	201.32	133.71	160.88	107.63	116.77	151.18	125.193	43.43	64.5	61.38	56.4367	--	-	-	GO:0009536//plastid
CL3786.Contig3_DB	3	80.89	54.45	82.64	72.66	57.77	62.69	59.31	59.9233	31.46	37.99	22.19	30.5467	--	GO:0006508//proteolysis	GO:0008233//peptidase activity	-
CL12584.Contig2_DB	3	25.03	12.69	16.11	17.9433	4.83	7.15	6.79	6.25667	6.38	7.55	3.76	5.89667	Serrate RNA effector molecule OS=Arabidopsis thaliana GN=SE PE=1 SV=2	GO:0048367//shoot system development;GO:0010267//production of ta-siRNAs involved in RNA interference;GO:0031053//primary miRNA processing;GO:2000011//regulation of adaxial/abaxial pattern formation;GO:0048509//regulation of meristem development	GO:0008270//zinc ion binding	GO:0005829//cytosol;GO:0005730//nucleolus;GO:0016607//nuclear speck;GO:0009507//chloroplast
CL28506.Contig7_DB	3	22.99	17.08	26.9	22.3233	5.91	14.5	10.18	10.1967	7.89	8.13	9.61	8.54333	Cyclin-T1-3 OS=Oryza sativa subsp. japonica GN=CYCT1-3 PE=3 SV=2	GO:0009615//response to virus;GO:0010090//trichome morphogenesis;GO:0006355//regulation of transcription, DNA-dependent;GO:0000079//regulation of cyclin-dependent protein serine/threonine kinase activity;GO:0009908//flower development;GO:0050792//regulation of viral reproduction;GO:0048366//leaf development	GO:0019901//protein kinase binding	GO:0005634//nucleus
CL15567.Contig1_DB	3	85.45	71	76.19	77.5467	20.15	23.71	30.52	24.7933	18.93	27.69	22.71	23.11	Ethylene-responsive transcription factor ERF117 OS=Arabidopsis thaliana GN=ERF117 PE=2 SV=1	GO:0006355//regulation of transcription, DNA-dependent	GO:0003700//sequence-specific DNA binding transcription factor activity	GO:0016023//cytoplasmic membrane-bounded vesicle;GO:0005634//nucleus
CL12002.Contig1_DB	3	60.97	47.54	54.54	54.35	19.61	23.83	26.89	23.4433	21.18	21.6	19.52	20.7667	Transcription factor GTE12 OS=Arabidopsis thaliana GN=GTE12 PE=2 SV=2	-	-	-
CL5182.Contig17_DB	3	11.88	12.15	16.82	13.6167	1.3	5.54	5.69	4.17667	3.8	3.63	3.72	3.71667	Ubiquitin thioesterase otubain-like OS=Arabidopsis thaliana GN=At1g28120 PE=2 SV=2	-	-	-
CL28374.Contig1_DB	3	16.85	30.68	24.74	24.09	2.79	6.49	7.37	5.55	4.2	5.63	5.3	5.04333	Serine/threonine-protein phosphatase 7 long form homolog OS=Arabidopsis thaliana GN=At1g48120 PE=2 SV=1	-	-	-
CL3310.Contig4_DB	3	26.64	18.19	16.01	20.28	2.25	2.74	6.57	3.85333	2.14	4.61	4.93	3.89333	Vegetative cell wall protein gp1 OS=Chlamydomonas reinhardtii GN=GP1 PE=2 SV=1	-	-	-
CL7171.Contig3_DB	3	19.33	13.91	19.47	17.57	6.12	7.42	9.95	7.83	6.46	8.35	5.86	6.89	GPCR-type G protein 1 OS=Arabidopsis thaliana GN=GTG1 PE=1 SV=1	GO:0009737//response to abscisic acid stimulus;GO:0010228//vegetative to reproductive phase transition of meristem	GO:0005525//GTP binding;GO:0051020//GTPase binding;GO:0010427//abscisic acid binding	GO:0005794//Golgi apparatus;GO:0005886//plasma membrane
CL2662.Contig1_DB	3	87.66	57	71.6	72.0867	36.74	59.1	67.94	54.5933	23.31	33.46	23.71	26.8267	E3 ubiquitin ligase BIG BROTHER OS=Arabidopsis thaliana GN=BB PE=1 SV=1	-	GO:0008270//zinc ion binding	GO:0009536//plastid
CL13552.Contig2_DB	3	22.1	19.37	18.49	19.9867	5.93	6.67	11.13	7.91	6.01	5.13	5.35	5.49667	Proline-rich receptor-like protein kinase PERK4 OS=Arabidopsis thaliana GN=PERK4 PE=1 SV=1	-	-	-
CL5693.Contig10_DB	3	21.06	14.01	16.24	17.1033	6.11	5.3	4.33	5.24667	4.84	6.9	1.17	4.30333	--	-	-	-
Unigene43917_DB	3	12.52	10.97	9.74	11.0767	3.27	4.07	4.05	3.79667	2.84	3.52	4.38	3.58	Proline-rich receptor-like protein kinase PERK2 OS=Arabidopsis thaliana GN=PERK2 PE=2 SV=3	GO:0044763	-	-
CL1174.Contig2_DB	3	32.29	25.64	28.17	28.7	8.21	13.65	18.7	13.52	14.8	13.18	7.97	11.9833	Probable histone H2A variant 3 OS=Oryza sativa subsp. japonica GN=Os03g0743400 PE=2 SV=1	GO:0015031//protein transport	GO:0008565//protein transporter activity	GO:0016021//integral to membrane;GO:0005886//plasma membrane
CL562.Contig2_DB	3	212.11	327.2	230.63	256.647	158.06	173.33	244.89	192.093	28.61	33.54	46.59	36.2467	Protein LHY OS=Arabidopsis thaliana GN=LHY PE=1 SV=2	-	-	-
CL7613.Contig2_DB	3	60.72	52.29	38.86	50.6233	15.65	24.37	18.5	19.5067	10.17	18.7	14.11	14.3267	--	-	-	-
CL14549.Contig2_DB	3	250.13	242.05	257.1	249.76	67.76	97.65	102.37	89.26	72.77	77.14	65.22	71.71	--	-	-	GO:0005777//peroxisome
Unigene1029_DB	3	30.74	26.4	27.15	28.0967	9.93	11.25	18.16	13.1133	11.36	11.17	11.42	11.3167	AP-4 complex subunit epsilon OS=Arabidopsis thaliana GN=At1g31730 PE=1 SV=1	GO:0006007//glucose catabolic process;GO:0016192//vesicle-mediated transport;GO:0006886//intracellular protein transport;GO:0006487//protein N-linked glycosylation	GO:0030276//clathrin binding	GO:0005829//cytosol;GO:0009506//plasmodesma;GO:0030117//membrane coat;GO:0005886//plasma membrane
CL14168.Contig2_DB	3	21.55	32.06	40.8	31.47	20.17	26.51	28.14	24.94	14.42	11.16	12.54	12.7067	Tryptophan synthase alpha chain OS=Arabidopsis thaliana GN=TRPA1 PE=1 SV=2	GO:0042742//defense response to bacterium;GO:0052544//defense response by callose deposition in cell wall;GO:0000162//tryptophan biosynthetic process	GO:0004834//tryptophan synthase activity	GO:0009570//chloroplast stroma
CL15421.Contig1_DB	3	29.31	28.64	23.85	27.2667	9.64	12.84	11.19	11.2233	16.18	7.95	9.13	11.0867	E3 ubiquitin-protein ligase CHIP OS=Arabidopsis thaliana GN=CHIP PE=1 SV=1	GO:0009628//response to abiotic stimulus;GO:0006950//response to stress;GO:0016567//protein ubiquitination	GO:0004842//ubiquitin-protein ligase activity	GO:0000151//ubiquitin ligase complex
CL13307.Contig2_DB	3	32.93	31.98	25.69	30.2	8.1	13.09	17.38	12.8567	13.96	12.99	8.33	11.76	Proline-rich receptor-like protein kinase PERK9 OS=Arabidopsis thaliana GN=PERK9 PE=2 SV=1	GO:0009860//pollen tube growth;GO:0006352//DNA-dependent transcription, initiation;GO:0051090//regulation of sequence-specific DNA binding transcription factor activity	GO:0046982//protein heterodimerization activity	GO:0005634//nucleus
CL9244.Contig1_DB	3	157.33	221.77	298.09	225.73	109.94	129.15	107.18	115.423	122.91	79.54	83.32	95.2567	LOB domain-containing protein 37 OS=Arabidopsis thaliana GN=LBD37 PE=2 SV=1	-	-	-
CL15037.Contig1_DB	3	40.6	50.84	31.07	40.8367	13.89	16.2	23.9	17.9967	10.88	20.48	16.92	16.0933	--	-	-	-
CL6095.Contig5_DB	3	93.22	67.1	48.27	69.53	21.12	22.23	30.72	24.69	31.84	33.75	19.68	28.4233	Leucine-rich repeat extensin-like protein 1 OS=Arabidopsis thaliana GN=LRX1 PE=1 SV=1	-	-	-
CL11989.Contig1_DB	3	38.27	72.14	78.54	62.9833	25.82	22.09	23.97	23.96	18.69	20.58	26.43	21.9	--	-	-	-
CL18802.Contig1_DB	3	12.31	10.56	11.11	11.3267	2.66	1.69	3.09	2.48	2.61	1.76	0.92	1.76333	CASP-like protein Os02g0134500 OS=Oryza sativa subsp. japonica GN=Os02g0134500 PE=2 SV=2	GO:0055114//oxidation-reduction process;GO:0042752//regulation of circadian rhythm;GO:0006355//regulation of transcription, DNA-dependent	GO:0004597//peptide-aspartate beta-dioxygenase activity;GO:0003700//sequence-specific DNA binding transcription factor activity	GO:0005634//nucleus
CL10784.Contig1_DB	3	24.87	29.83	23.98	26.2267	8.42	8.71	10.57	9.23333	8.9	11.45	2.64	7.66333	Probable glucuronosyltransferase Os03g0287800 OS=Oryza sativa subsp. japonica GN=Os03g0287800 PE=3 SV=1	-	GO:0015018//galactosylgalactosylxylosylprotein 3-beta-glucuronosyltransferase activity	GO:0016020//membrane
Unigene39762_DB	3	44.6	35.14	42.97	40.9033	10	8.38	18.18	12.1867	10.31	14.72	14.92	13.3167	--	-	-	-
CL3473.Contig2_DB	3	36.3	44.74	31.77	37.6033	22.39	31.76	38.02	30.7233	12.49	17.24	14.12	14.6167	Protein LHY OS=Arabidopsis thaliana GN=LHY PE=1 SV=2	-	-	-
CL9408.Contig1_DB	3	57.13	65.13	61.42	61.2267	19.03	8.83	21.24	16.3667	18.68	25.04	19.05	20.9233	Ethylene receptor 1 OS=Pelargonium hortorum GN=ETR1 PE=2 SV=1	GO:0000160//two-component signal transduction system (phosphorelay);GO:0009625//response to insect;GO:0009739//response to gibberellin stimulus;GO:0009651//response to salt stress;GO:0042742//defense response to bacterium;GO:0010119//regulation of stomatal movement;GO:0009408//response to heat;GO:0023014//signal transduction by phosphorylation;GO:0009733//response to auxin stimulus;GO:0052544//de…	GO:0051740//ethylene binding;GO:0005524//ATP binding;GO:0000155//phosphorelay sensor kinase activity	GO:0005789//endoplasmic reticulum membrane
CL6820.Contig2_DB	3	32.72	29.26	34.15	32.0433	8.38	9.28	7.85	8.50333	10.16	5.32	8.05	7.84333	Ubiquitin carboxyl-terminal hydrolase 23 OS=Arabidopsis thaliana GN=UBP23 PE=2 SV=2	-	GO:0016787//hydrolase activity	-
CL2460.Contig2_DB	3	296.54	331.07	366.11	331.24	75.87	99.9	93.68	89.8167	91.78	69.95	91.58	84.4367	Vegetative cell wall protein gp1 OS=Chlamydomonas reinhardtii GN=GP1 PE=2 SV=1	GO:0009611//response to wounding	-	GO:0005773//vacuole;GO:0009507//chloroplast
CL19796.Contig1_DB	3	26.58	15.11	14.91	18.8667	5.96	5.53	10.49	7.32667	5	9.82	6.15	6.99	Thylakoidal processing peptidase 1, chloroplastic OS=Arabidopsis thaliana GN=TPP1 PE=2 SV=2	GO:0006508//proteolysis	GO:0008236//serine-type peptidase activity	GO:0016021//integral to membrane
CL4559.Contig2_DB	3	27.67	26.25	23.17	25.6967	13.97	21.64	26.14	20.5833	9.65	12.23	8.63	10.17	Probable ubiquitin-conjugating enzyme E2 25 OS=Arabidopsis thaliana GN=UBC25 PE=2 SV=1	-	GO:0016881//acid-amino acid ligase activity	GO:0009536//plastid
Unigene4662_DB	3	29.63	26.42	32.02	29.3567	10.9	15.03	14.44	13.4567	10.09	9.85	10.62	10.1867	Golgi apparatus membrane protein-like protein ECHIDNA OS=Arabidopsis thaliana GN=ECH PE=2 SV=1	-	-	GO:0016023//cytoplasmic membrane-bounded vesicle;GO:0016021//integral to membrane
CL8389.Contig1_DB	3	43.09	52.41	36.01	43.8367	14.65	15.22	20.5	16.79	11.59	17.67	14.72	14.66	--	GO:0016310//phosphorylation	GO:0016301//kinase activity	-
Unigene33996_DB	3	25.02	29.74	19.14	24.6333	3.23	3.98	8.45	5.22	1.65	10.57	4.93	5.71667	Probably inactive leucine-rich repeat receptor-like protein kinase At5g06940 OS=Arabidopsis thaliana GN=At5g06940 PE=3 SV=1	GO:0008152//metabolic process	GO:0016301//kinase activity	GO:0016023//cytoplasmic membrane-bounded vesicle
CL4123.Contig5_DB	3	53.45	62.19	70.29	61.9767	12.47	13.25	25.82	17.18	13.32	35.62	11.97	20.3033	--	-	-	-
CL10008.Contig3_DB	3	22	20.44	16.34	19.5933	6.78	10.03	8.48	8.43	9.28	8.63	5.48	7.79667	--	-	-	GO:0009536//plastid
CL7943.Contig5_DB	3	12.5	10.17	16.87	13.18	2.74	4.05	1.57	2.78667	1.2	3.47	1.58	2.08333	Arginine/serine-rich protein 45 OS=Arabidopsis thaliana GN=SR45 PE=1 SV=1	-	-	-
CL26318.Contig2_DB	3	12.09	17.41	14.59	14.6967	3.41	4.92	3.08	3.80333	0.36	7.11	3.34	3.60333	--	-	-	-
CL13079.Contig3_DB	3	20.71	13.31	11.46	15.16	3.89	8.68	5.78	6.11667	6.64	7.02	3.65	5.77	50S ribosomal protein L19, chloroplastic OS=Spinacia oleracea GN=RPL19 PE=1 SV=2	GO:0042254//ribosome biogenesis;GO:0006412//translation	GO:0003735//structural constituent of ribosome	GO:0005840//ribosome;GO:0005739//mitochondrion
Unigene31352_DB	3	66.12	47.32	52.06	55.1667	16.85	15.29	27.11	19.75	15.67	21.17	14.29	17.0433	--	GO:0016310//phosphorylation	GO:0016301//kinase activity	GO:0016020//membrane;GO:0016023//cytoplasmic membrane-bounded vesicle
CL17467.Contig3_DB	3	49.59	65.73	34.2	49.84	3.26	8.98	9.21	7.15	3.03	7.46	1.72	4.07	--	-	-	-
CL6866.Contig1_DB	3	17.17	14.27	15.33	15.59	6.23	7.74	9.9	7.95667	7.27	3.97	5.9	5.71333	Vegetative cell wall protein gp1 OS=Chlamydomonas reinhardtii GN=GP1 PE=2 SV=1	-	GO:0008270//zinc ion binding;GO:0000166//nucleotide binding;GO:0003723//RNA binding	-
CL16872.Contig1_DB	3	25.44	14.12	13.44	17.6667	6.63	0.97	7.61	5.07	3.16	2.24	4.78	3.39333	--	-	-	-
CL20247.Contig1_DB	3	13.37	14.11	18.96	15.48	3.37	2.24	3.52	3.04333	2.47	5.55	2.9	3.64	DIMBOA UDP-glucosyltransferase BX9 OS=Zea mays GN=BX9 PE=1 SV=1	GO:0008152//metabolic process	GO:0035251//UDP-glucosyltransferase activity	-
CL3608.Contig3_DB	3	25.46	21.03	16.25	20.9133	1.23	5.37	9.47	5.35667	2.04	5.5	3.37	3.63667	--	-	-	-
CL2960.Contig3_DB	3	31.26	30.87	23.17	28.4333	6.18	9.12	14.88	10.06	8.39	15.68	8.49	10.8533	F-box/LRR-repeat MAX2 homolog OS=Oryza sativa subsp. japonica GN=D3 PE=2 SV=2	GO:0009414//response to water deprivation;GO:0009934//regulation of meristem structural organization;GO:0009926//auxin polar transport;GO:0010016//shoot system morphogenesis;GO:0007568//aging;GO:0009416//response to light stimulus	-	GO:0005634//nucleus;GO:0000151//ubiquitin ligase complex
Unigene588_DB	3	22.09	11.51	14.02	15.8733	3.75	3.95	2.21	3.30333	2.76	3.3	0.98	2.34667	--	-	-	-
Unigene36753_DB	3	21.14	21.71	16.32	19.7233	2.66	4.23	3.03	3.30667	1.15	6.29	2.58	3.34	--	-	-	-
Unigene42569_DB	3	49.94	51.97	29.14	43.6833	6.32	14.86	12.23	11.1367	7.86	19.95	13.96	13.9233	--	-	-	-
CL20986.Contig1_DB	3	28.76	35.21	19.59	27.8533	6.7	10.84	8.43	8.65667	8.06	14.09	7.58	9.91	Disease resistance protein RPP13 OS=Arabidopsis thaliana GN=RPP13 PE=2 SV=2	-	-	-
CL26318.Contig3_DB	3	55.68	65.56	65.26	62.1667	13.29	20.29	33.14	22.24	17.53	20.8	15.19	17.84	Elongator complex protein 4 OS=Arabidopsis thaliana GN=ELP4 PE=1 SV=1	-	-	-
CL21329.Contig1_DB	3	46.25	48.81	50.09	48.3833	12.14	19.71	27.14	19.6633	12.76	20.04	8.82	13.8733	Protein TWIN LOV 1 OS=Arabidopsis thaliana GN=TLP1 PE=1 SV=2	GO:0046777//protein autophosphorylation;GO:0006355//regulation of transcription, DNA-dependent;GO:0010155//regulation of proton transport;GO:0007165//signal transduction	GO:0004871//signal transducer activity;GO:0016301//kinase activity	GO:0005886//plasma membrane
CL8115.Contig1_DB	3	93.76	72.58	96.06	87.4667	35.65	25.12	29.67	30.1467	26.06	32.17	20.75	26.3267	Putative DNA repair protein RAD23-3 OS=Arabidopsis thaliana GN=RAD23-3 PE=2 SV=2	GO:0006355//regulation of transcription, DNA-dependent	GO:0003677//DNA binding;GO:0003700//sequence-specific DNA binding transcription factor activity	GO:0005634//nucleus
CL11507.Contig1_DB	3	25.05	8.76	46.01	26.6067	3.37	4.7	8.63	5.56667	2.56	4.73	4.94	4.07667	--	-	-	-
CL4929.Contig1_DB	3	251.52	206.82	124.67	194.337	72.6	94.14	61.72	76.1533	55.6	98.82	47.49	67.3033	--	-	-	-
CL9802.Contig1_DB	3	210.79	232.96	238.16	227.303	53.02	52.34	71.24	58.8667	55.23	56.91	70.85	60.9967	Light-inducible protein CPRF2 OS=Petroselinum crispum GN=CPRF2 PE=2 SV=2	GO:0006355//regulation of transcription, DNA-dependent	GO:0003700//sequence-specific DNA binding transcription factor activity;GO:0043565//sequence-specific DNA binding	-
CL1003.Contig2_DB	3	24.12	22.14	18.24	21.5	9.8	11.27	10.34	10.47	7.31	6.65	9.26	7.74	--	-	GO:0097159//organic cyclic compound binding;GO:1901363	-
CL12339.Contig2_DB	3	89.06	70.05	80.49	79.8667	36.7	33.78	46.57	39.0167	23.11	38.51	25.42	29.0133	--	-	GO:0003723//RNA binding	-
CL12091.Contig3_DB	3	2528.18	1960.18	1229.58	1905.98	419.89	487.17	891.41	599.49	688.2	1096.43	377.71	720.78	Auxin-repressed 12.5 kDa protein OS=Fragaria ananassa PE=2 SV=1	GO:0009749//response to glucose stimulus;GO:0009750//response to fructose stimulus;GO:0009744//response to sucrose stimulus	-	-
CL4520.Contig2_DB	3	21.35	20.15	16.22	19.24	13.46	11.64	18.23	14.4433	7.44	6.51	7.14	7.03	Glycine-rich RNA-binding protein 3, mitochondrial OS=Arabidopsis thaliana GN=RBG3 PE=2 SV=1	GO:0006396//RNA processing	GO:0003723//RNA binding;GO:0000166//nucleotide binding	GO:0005737//cytoplasm;GO:0044428//nuclear part
CL10762.Contig1_DB	3	14.02	12.95	16	14.3233	2.19	4.26	5.08	3.84333	2.06	3.81	2.65	2.84	Formin-like protein 20 OS=Arabidopsis thaliana GN=FH20 PE=2 SV=3	-	-	-
CL4.Contig3_DB	3	12.28	13.92	10.05	12.0833	6.62	10.1	9.69	8.80333	4.09	4.1	6.09	4.76	Probable receptor-like protein kinase At5g39020 OS=Arabidopsis thaliana GN=At5g39020 PE=2 SV=1	GO:0006468//protein phosphorylation	GO:0004713//protein tyrosine kinase activity;GO:0005524//ATP binding;GO:0004674//protein serine/threonine kinase activity	GO:0016023//cytoplasmic membrane-bounded vesicle
CL1811.Contig2_DB	3	31.64	33.67	23.47	29.5933	4.14	9.25	17.57	10.32	11.18	15.85	3.96	10.33	F-box protein At2g05970 OS=Arabidopsis thaliana GN=At2g05970 PE=2 SV=1	-	-	-
CL1479.Contig3_DB	3	19.81	27.36	9.91	19.0267	2.49	3.26	1.99	2.58	1.19	4.68	1.33	2.4	Sulfated surface glycoprotein 185 OS=Volvox carteri PE=1 SV=1	-	-	-
CL1391.Contig1_DB	3	97.22	131.57	99.16	109.317	30.49	37.99	64.19	44.2233	29.27	36.29	38.27	34.61	--	-	-	-
Unigene11116_DB	3	43.59	47	14.95	35.18	4.95	6.27	13.08	8.1	10.01	11.84	6.7	9.51667	--	-	-	-
CL5847.Contig1_DB	3	36.34	28.63	33.84	32.9367	14.96	16.33	18.83	16.7067	13.06	14.78	10.72	12.8533	Casein kinase II subunit beta OS=Arabidopsis thaliana GN=CKB1 PE=1 SV=1	GO:0042753//positive regulation of circadian rhythm;GO:0045859//regulation of protein kinase activity;GO:0048573//photoperiodism, flowering	GO:0004674//protein serine/threonine kinase activity;GO:0008134//transcription factor binding;GO:0019887//protein kinase regulator activity	GO:0005956//protein kinase CK2 complex;GO:0005737//cytoplasm;GO:0005634//nucleus
CL13690.Contig1_DB	3	195.63	225.69	228.49	216.603	78.89	93.81	104.51	92.4033	70.55	92.69	66.91	76.7167	Proline-rich receptor-like protein kinase PERK2 OS=Arabidopsis thaliana GN=PERK2 PE=2 SV=3	-	-	GO:0009536//plastid
Unigene34132_DB	3	92.67	86.31	50.06	76.3467	14.08	27.24	41.11	27.4767	23.65	44.19	21.87	29.9033	Polyubiquitin 3 OS=Oryza sativa subsp. japonica GN=UBQ3 PE=2 SV=2	GO:0006464//cellular protein modification process;GO:0006511//ubiquitin-dependent protein catabolic process	-	GO:0016023//cytoplasmic membrane-bounded vesicle
CL7276.Contig6_DB	3	13.76	20.43	14.09	16.0933	5.17	4.12	1.79	3.69333	3.21	5.7	0	2.97	Pescadillo homolog OS=Chlamydomonas reinhardtii GN=CHLREDRAFT_206018 PE=3 SV=1	GO:0006364//rRNA processing;GO:0006606//protein import into nucleus;GO:0051604//protein maturation	GO:0003713//transcription coactivator activity	GO:0005730//nucleolus
CL13196.Contig8_DB	3	11.47	14.73	6.65	10.95	3.51	2.72	2.22	2.81667	1.81	4.69	2.31	2.93667	--	-	-	-
CL24006.Contig1_DB	3	159.92	154.75	142.25	152.307	52.25	65.09	90.78	69.3733	55.37	73.06	53.72	60.7167	DeSI-like protein At4g17486 OS=Arabidopsis thaliana GN=At4g17486 PE=2 SV=1	-	-	-
Unigene5283_DB	3	37.99	42.35	30.47	36.9367	6.49	5.04	10.89	7.47333	3.5	12.06	6.22	7.26	--	-	-	-
CL19988.Contig1_DB	3	50.81	43.62	44	46.1433	18.6	25.36	26.39	23.45	21.58	15.14	13.91	16.8767	Cyclin-dependent kinase C-1 OS=Oryza sativa subsp. japonica GN=CDKC-1 PE=2 SV=1	GO:0009615//response to virus;GO:0006468//protein phosphorylation;GO:0048440//carpel development;GO:0007049//cell cycle;GO:0050792//regulation of viral reproduction;GO:0048366//leaf development;GO:0006397//mRNA processing	GO:0008353//RNA polymerase II carboxy-terminal domain kinase activity;GO:0005524//ATP binding;GO:0004693//cyclin-dependent protein kinase activity	GO:0005829//cytosol;GO:0016604//nuclear body
CL10203.Contig2_DB	3	32.85	34.44	42.36	36.55	16.5	12.36	16.45	15.1033	14.71	14.08	9.07	12.62	--	-	-	-
CL18856.Contig6_DB	3	8.12	16.09	7.17	10.46	1.11	4.92	2.71	2.91333	1.97	3.34	2.63	2.64667	Serine carboxypeptidase-like 18 OS=Arabidopsis thaliana GN=SCPL18 PE=2 SV=2	GO:0006508//proteolysis	GO:0004185//serine-type carboxypeptidase activity	GO:0016023//cytoplasmic membrane-bounded vesicle;GO:0005739//mitochondrion
CL28408.Contig1_DB	3	16.4	36.55	18.63	23.86	1.54	3.67	10.24	5.15	3.94	1.58	3.3	2.94	--	-	-	-
CL7486.Contig1_DB	3	25.8	32.67	30.21	29.56	6.49	13.76	19.36	13.2033	12.94	13.48	10.39	12.27	ADP-ribosylation factor 1 OS=Brassica rapa subsp. pekinensis GN=ARF1 PE=2 SV=3	GO:0007264//small GTPase mediated signal transduction	GO:0005525//GTP binding	GO:0005622//intracellular
CL23331.Contig1_DB	3	13.92	23.73	18.5	18.7167	3.5	4.73	10.02	6.08333	3.3	5.61	5.86	4.92333	Sulfated surface glycoprotein 185 OS=Volvox carteri PE=1 SV=1	GO:0006071//glycerol metabolic process;GO:0006629//lipid metabolic process	GO:0008889//glycerophosphodiester phosphodiesterase activity	GO:0005886//plasma membrane
CL3053.Contig4_DB	3	34.08	38.56	25.1	32.58	9.72	8.92	17.99	12.21	9.32	9.65	7.26	8.74333	Cell division control protein 48 homolog C OS=Arabidopsis thaliana GN=CDC48C PE=2 SV=2	-	GO:0017111//nucleoside-triphosphatase activity;GO:0005524//ATP binding	-
CL13892.Contig3_DB	3	15.7	18.89	15.07	16.5533	7.16	6.9	6.31	6.79	4.43	5.05	7.21	5.56333	Mitochondrial import inner membrane translocase subunit TIM50 OS=Phytophthora infestans GN=TIM50 PE=2 SV=1	GO:0016311//dephosphorylation	GO:0016791//phosphatase activity	-
CL20956.Contig1_DB	3	914.85	1107.11	1295.78	1105.91	389.9	393.93	421.08	401.637	306.05	440.49	391.18	379.24	Formin-like protein 20 OS=Arabidopsis thaliana GN=FH20 PE=2 SV=3	GO:0009611//response to wounding	-	GO:0005773//vacuole
Unigene34561_DB	3	51.09	44.14	28.73	41.32	16.02	20.27	25.93	20.74	12.95	21.63	12.36	15.6467	Growth-regulating factor 11 OS=Oryza sativa subsp. japonica GN=GRF11 PE=2 SV=1	GO:0006355//regulation of transcription, DNA-dependent	GO:0005524//ATP binding;GO:0016818//hydrolase activity, acting on acid anhydrides, in phosphorus-containing anhydrides	GO:0005634//nucleus
CL19904.Contig5_DB	3	31.45	20.72	17.57	23.2467	9.58	5.03	9.01	7.87333	6.8	9.16	7.96	7.97333	DNA repair protein XRCC4 OS=Arabidopsis thaliana GN=XRCC4 PE=1 SV=2	GO:0006302//double-strand break repair;GO:0006310//DNA recombination	GO:0003677//DNA binding;GO:0008022//protein C-terminus binding	GO:0005634//nucleus
Unigene44119_DB	3	29.1	26.15	52.64	35.9633	6.34	19.63	9.03	11.6667	2.68	7.77	15.5	8.65	--	-	-	-
CL29148.Contig1_DB	3	15.18	12.83	9.63	12.5467	2.07	2.82	6.62	3.83667	1.29	6.71	3.66	3.88667	Diacylglycerol O-acyltransferase 1 OS=Arabidopsis thaliana GN=DGAT1 PE=1 SV=2	GO:0009749//response to glucose stimulus;GO:0009651//response to salt stress;GO:0009409//response to cold;GO:0045995//regulation of embryonic development;GO:0005975//carbohydrate metabolic process;GO:0009737//response to abscisic acid stimulus;GO:0019432//triglyceride biosynthetic process;GO:0007568//aging;GO:0010030//positive regulation of seed germination	GO:0004144//diacylglycerol O-acyltransferase activity	GO:0016021//integral to membrane;GO:0009941//chloroplast envelope;GO:0005789//endoplasmic reticulum membrane
CL24898.Contig1_DB	3	86.29	78.08	53.03	72.4667	41.59	43.68	67.77	51.0133	23.29	29.09	22.79	25.0567	--	GO:0005975//carbohydrate metabolic process;GO:0048364//root development;GO:0006520//cellular amino acid metabolic process	GO:0004575//sucrose alpha-glucosidase activity;GO:0033926	GO:0005886//plasma membrane;GO:0005634//nucleus;GO:0005829//cytosol
CL14980.Contig1_DB	3	18.34	18.1	18.92	18.4533	5.27	8.84	11.35	8.48667	5.16	8.92	4.98	6.35333	MAR-binding filament-like protein 1 OS=Arabidopsis thaliana GN=MFP1 PE=1 SV=2	GO:0007154//cell communication	GO:0035091//phosphatidylinositol binding	-
Unigene30345_DB	3	17.8	20.26	17.44	18.5	6.71	5.89	8.57	7.05667	6.5	7.18	5.73	6.47	--	-	-	-
CL18643.Contig1_DB	3	91.8	73.43	82.23	82.4867	34.06	41.14	51.98	42.3933	37.83	41.38	24.57	34.5933	Glycine-rich RNA-binding protein GRP2A OS=Sinapis alba PE=2 SV=1	GO:0006810//transport	GO:0003676//nucleic acid binding;GO:0000166//nucleotide binding	GO:0009536//plastid
CL9930.Contig2_DB	3	13.18	15.91	15.9	14.9967	5.83	6.75	9.5	7.36	6.57	5.51	5.02	5.7	Nucleolin 1 OS=Arabidopsis thaliana GN=NUCL1 PE=1 SV=1	-	-	-
CL5014.Contig2_DB	3	16.96	16.75	22.48	18.73	6.72	3.57	6.83	5.70667	2.33	4.3	2.87	3.16667	Probable protein phosphatase 2C 66 OS=Oryza sativa subsp. japonica GN=Os08g0500300 PE=2 SV=1	GO:0008152//metabolic process	GO:0046872//metal ion binding;GO:0004722//protein serine/threonine phosphatase activity	GO:0005886//plasma membrane
CL4994.Contig2_DB	3	13.38	15.19	13.51	14.0267	4.63	7.84	7.03	6.5	3.17	4.79	5.84	4.6	Serine/threonine-protein kinase AFC2 OS=Arabidopsis thaliana GN=AFC2 PE=1 SV=1	GO:0006098//pentose-phosphate shunt;GO:0019760//glucosinolate metabolic process;GO:0016117//carotenoid biosynthetic process;GO:0043085//positive regulation of catalytic activity;GO:0019252//starch biosynthetic process;GO:0006397//mRNA processing;GO:0006783//heme biosynthetic process;GO:0019288//isopentenyl diphosphate biosynthetic process, mevalonate-independent pathway;GO:0000023//maltose metabo…	GO:0005515//protein binding;GO:0004325//ferrochelatase activity;GO:0004712//protein serine/threonine/tyrosine kinase activity;GO:0004674//protein serine/threonine kinase activity;GO:0005524//ATP binding	GO:0009507//chloroplast;GO:0005634//nucleus
CL5726.Contig6_DB	3	19.36	13.82	13.32	15.5	8.41	8.52	8.36	8.43	7.37	6.88	3.48	5.91	Pre-mRNA-splicing factor SF2 OS=Arabidopsis thaliana GN=SF2 PE=1 SV=1	-	GO:0003676//nucleic acid binding;GO:0000166//nucleotide binding	GO:0035061//interchromatin granule;GO:0016607//nuclear speck;GO:0005739//mitochondrion
CL2172.Contig1_DB	3	40.95	43.95	38.45	41.1167	12.85	19.38	24.17	18.8	15.03	15.99	14.45	15.1567	--	-	-	-
CL2813.Contig3_DB	3	16.28	25.72	11.34	17.78	1.53	6.99	10.3	6.27333	3.9	7.69	5.03	5.54	Protein argonaute 4A OS=Oryza sativa subsp. japonica GN=AGO4A PE=2 SV=1	-	-	-
CL546.Contig2_DB	3	15.01	13.44	8.9	12.45	2.17	1.36	3.74	2.42333	1	3.66	2.08	2.24667	Probable phytol kinase 2, chloroplastic OS=Oryza sativa subsp. japonica GN=Os01g0832000 PE=2 SV=3	GO:0044237//cellular metabolic process	GO:0016772//transferase activity, transferring phosphorus-containing groups	GO:0016020//membrane;GO:0009536//plastid;GO:0005739//mitochondrion
CL2305.Contig1_DB	3	125.66	116.83	106.48	116.323	48.86	60	80.22	63.0267	52.66	48.93	39.6	47.0633	Glutenin, high molecular weight subunit DX5 OS=Triticum aestivum GN=GLU-1D-1D PE=3 SV=5	-	GO:0003723//RNA binding	GO:0016023//cytoplasmic membrane-bounded vesicle;GO:0005829//cytosol
CL3457.Contig5_DB	3	33.28	27.94	32.02	31.08	13.2	18.87	21.85	17.9733	16.99	15.29	6.73	13.0033	Vegetative cell wall protein gp1 OS=Chlamydomonas reinhardtii GN=GP1 PE=2 SV=1	GO:0001510//RNA methylation;GO:0006364//rRNA processing	GO:0008168//methyltransferase activity	GO:0005634//nucleus
Unigene5402_DB	3	27.22	19.98	21.19	22.7967	8.69	13.53	8.53	10.25	8.29	9.64	7.62	8.51667	HIPL1 protein OS=Arabidopsis thaliana GN=HIPL1 PE=1 SV=2	-	GO:0003824//catalytic activity	GO:0016023//cytoplasmic membrane-bounded vesicle;GO:0005886//plasma membrane;GO:0005739//mitochondrion
CL22405.Contig2_DB	3	612.54	480.03	608.57	567.047	188.23	225.71	290.42	234.787	141.77	221.24	124.29	162.433	Protein DEHYDRATION-INDUCED 19 OS=Oryza sativa subsp. japonica GN=DI19-1 PE=2 SV=1	-	GO:0008270//zinc ion binding	GO:0005622//intracellular
CL24336.Contig1_DB	3	27.57	22.73	26.73	25.6767	9.92	13.79	16.33	13.3467	12.45	11.39	7.87	10.57	--	GO:0010150//leaf senescence;GO:0006914//autophagy;GO:0006139//nucleobase-containing compound metabolic process;GO:0043170	-	GO:0005730//nucleolus;GO:0005886//plasma membrane
CL17158.Contig2_DB	3	26.09	18.12	21.28	21.83	9.22	9.79	13.44	10.8167	12.36	6.07	6.55	8.32667	--	-	-	-
CL1605.Contig10_DB	3	323.67	338.9	135.75	266.107	73.09	84.21	139.13	98.81	90.15	158.63	76.31	108.363	--	-	-	-
CL6913.Contig1_DB	3	57.63	50.06	48.51	52.0667	22.92	23.78	28.65	25.1167	17.93	22.8	17.41	19.38	Zinc finger CCCH domain-containing protein 19 OS=Oryza sativa subsp. japonica GN=Os02g0831100 PE=2 SV=2	-	GO:0003676//nucleic acid binding;GO:0046872//metal ion binding	-
CL10350.Contig1_DB	3	348.73	420.03	316.62	361.793	136.31	136.78	155.7	142.93	109.55	129	160.46	133.003	Manganese-dependent ADP-ribose/CDP-alcohol diphosphatase OS=Oryza sativa subsp. japonica GN=Os07g0688000 PE=2 SV=1	-	GO:0046872//metal ion binding;GO:0047734//CDP-glycerol diphosphatase activity;GO:0047631//ADP-ribose diphosphatase activity	-
CL15034.Contig2_DB	3	11.59	10.47	10.23	10.7633	1.52	3.15	2.59	2.42	1.57	2.05	0	1.20667	--	-	-	-
Unigene34726_DB	3	35.88	30.31	19.28	28.49	6.41	11.28	15.7	11.13	7.29	7.68	8.49	7.82	Cell division control protein 48 homolog C OS=Arabidopsis thaliana GN=CDC48C PE=2 SV=2	-	GO:0017111//nucleoside-triphosphatase activity;GO:0005524//ATP binding	-
CL4414.Contig1_DB	3	20.91	20.77	28.77	23.4833	19.47	19.66	14.37	17.8333	6.47	13.31	5.78	8.52	B-box zinc finger protein 20 OS=Arabidopsis thaliana GN=BBX20 PE=1 SV=1	-	-	-
CL7947.Contig2_DB	3	33.52	40.51	33.1	35.71	9.31	15.98	20.83	15.3733	13.91	15.6	12.49	14	Zinc transporter 4 OS=Oryza sativa subsp. japonica GN=ZIP4 PE=2 SV=1	GO:0010043//response to zinc ion;GO:0071577//zinc ion transmembrane transport	GO:0008270//zinc ion binding;GO:0005385//zinc ion transmembrane transporter activity	GO:0016023//cytoplasmic membrane-bounded vesicle;GO:0005886//plasma membrane;GO:0016021//integral to membrane;GO:0005739//mitochondrion
CL24555.Contig1_DB	3	21.65	24.68	17.17	21.1667	7.19	8.47	6.17	7.27667	4.52	7.11	6.68	6.10333	--	-	-	-
CL12003.Contig2_DB	3	34.88	33.59	38.99	35.82	13.05	19.65	19.28	17.3267	8.99	13.3	12.37	11.5533	U1 small nuclear ribonucleoprotein 70 kDa OS=Arabidopsis thaliana GN=RNU1 PE=1 SV=1	GO:0006457//protein folding;GO:0000413//protein peptidyl-prolyl isomerization	GO:0003723//RNA binding;GO:0008270//zinc ion binding;GO:0003755//peptidyl-prolyl cis-trans isomerase activity;GO:0000166//nucleotide binding	GO:0005634//nucleus
Unigene39502_DB	3	73.12	64.25	89.12	75.4967	27.88	25.69	39.11	30.8933	23.77	30.33	17.72	23.94	--	-	-	-
CL8416.Contig4_DB	3	22.6	21.95	38.6	27.7167	10	9.31	14.35	11.22	11.11	9.08	9.72	9.97	--	-	-	-
CL19506.Contig1_DB	3	13.33	15.11	12.25	13.5633	2.53	1.94	5.33	3.26667	3.72	2.93	1.75	2.8	--	-	-	-
CL21535.Contig1_DB	3	18.04	18.08	20.36	18.8267	7.88	8.39	13.47	9.91333	4.33	9.55	6.08	6.65333	Cyclin-dependent kinase D-1 OS=Oryza sativa subsp. japonica GN=CDKD-1 PE=1 SV=1	GO:0007049//cell cycle;GO:0006468//protein phosphorylation;GO:0051301//cell division	GO:0004693//cyclin-dependent protein kinase activity;GO:0008353//RNA polymerase II carboxy-terminal domain kinase activity;GO:0005524//ATP binding	GO:0005737//cytoplasm;GO:0005634//nucleus
CL19045.Contig2_DB	3	18.42	41.29	30.89	30.2	6.37	6.57	10.59	7.84333	3.19	5.89	4.77	4.61667	Probable AMP deaminase OS=Oryza sativa subsp. japonica GN=AMPD PE=2 SV=1	GO:0009880//embryonic pattern specification;GO:0050826//response to freezing;GO:0048825//cotyledon development;GO:0051301//cell division;GO:0009640//photomorphogenesis;GO:0010564//regulation of cell cycle process;GO:0019915//lipid storage;GO:0032264//IMP salvage;GO:0010182//sugar mediated signaling pathway;GO:0016567//protein ubiquitination;GO:0009845//seed germination;GO:0010228//vegetative to r…	GO:0043424//protein histidine kinase binding;GO:0003876//AMP deaminase activity;GO:0046872//metal ion binding	GO:0005829//cytosol;GO:0005634//nucleus;GO:0031307//integral to mitochondrial outer membrane
CL6934.Contig1_DB	3	19.14	15.75	16	16.9633	7.38	9.9	9.25	8.84333	9.27	7.53	4.09	6.96333	Protein Mut11 OS=Chlamydomonas reinhardtii GN=Mut11 PE=2 SV=1	-	GO:0000166//nucleotide binding	GO:0080008//Cul4-RING ubiquitin ligase complex;GO:0005737//cytoplasm;GO:0005834//heterotrimeric G-protein complex
CL1106.Contig1_DB	3	35.22	39.18	24.25	32.8833	8.74	9.8	10.28	9.60667	5.98	9.06	11.01	8.68333	Probable receptor-like protein kinase At5g15080 OS=Arabidopsis thaliana GN=At5g15080 PE=1 SV=1	GO:0006468//protein phosphorylation	GO:0004713//protein tyrosine kinase activity;GO:0005524//ATP binding;GO:0004674//protein serine/threonine kinase activity	GO:0005886//plasma membrane
CL12678.Contig1_DB	3	19.2	22.51	15.79	19.1667	4.93	7.72	10.12	7.59	3.5	8.81	8.8	7.03667	Chaperone protein dnaJ 49 OS=Arabidopsis thaliana GN=ATJ49 PE=2 SV=2	GO:0010048//vernalization response;GO:0007346//regulation of mitotic cell cycle	-	GO:0009536//plastid
CL8437.Contig12_DB	3	15.97	8.54	10.71	11.74	2.89	3.89	3.52	3.43333	3.02	2.26	2.65	2.64333	RNA polymerase II C-terminal domain phosphatase-like 1 OS=Arabidopsis thaliana GN=CPL1 PE=1 SV=1	GO:0016311//dephosphorylation;GO:0009628//response to abiotic stimulus;GO:0009738//abscisic acid mediated signaling pathway	GO:0003725//double-stranded RNA binding;GO:0019204//nucleotide phosphatase activity	-
CL574.Contig3_DB	3	33.76	25.06	20.6	26.4733	10.43	13.85	14.85	13.0433	12.05	10.85	8.29	10.3967	--	GO:0016558//protein import into peroxisome matrix;GO:0048573//photoperiodism, flowering;GO:0000956//nuclear-transcribed mRNA catabolic process;GO:0006635//fatty acid beta-oxidation;GO:0019722//calcium-mediated signaling	-	-
CL3329.Contig3_DB	3	80.94	81.09	71.43	77.82	29.84	42.27	45.33	39.1467	30.6	36.08	23.41	30.03	Serine/threonine-protein kinase HT1 OS=Arabidopsis thaliana GN=HT1 PE=1 SV=1	GO:0006468//protein phosphorylation	GO:0004713//protein tyrosine kinase activity;GO:0005524//ATP binding;GO:0004674//protein serine/threonine kinase activity	GO:0005886//plasma membrane
CL7867.Contig2_DB	3	63.15	90.34	79.3	77.5967	36.49	46.64	38.22	40.45	35.29	27.64	33.8	32.2433	PGR5-like protein 1A, chloroplastic OS=Arabidopsis thaliana GN=PGRL1A PE=1 SV=1	-	-	GO:0016023//cytoplasmic membrane-bounded vesicle;GO:0005739//mitochondrion;GO:0009507//chloroplast
CL2405.Contig2_DB	3	30.27	41.84	40.08	37.3967	13.26	11.05	24.84	16.3833	13.34	17.09	9.68	13.37	Glycine-rich RNA-binding protein 4, mitochondrial OS=Arabidopsis thaliana GN=RBG4 PE=2 SV=1	GO:0048573//photoperiodism, flowering	GO:0003676//nucleic acid binding;GO:0000166//nucleotide binding	-
CL474.Contig3_DB	3	70.6	77.64	69.24	72.4933	28.34	30.69	42.29	33.7733	28.64	30.64	25.84	28.3733	Histone acetyltransferase GCN5 OS=Oryza sativa subsp. japonica GN=GCN5 PE=2 SV=1	GO:0006468//protein phosphorylation;GO:0000910//cytokinesis;GO:0006409//tRNA export from nucleus;GO:0007017//microtubule-based process	GO:0004672//protein kinase activity;GO:0005524//ATP binding;GO:0005515//protein binding;GO:0000049//tRNA binding	GO:0005643//nuclear pore;GO:0005737//cytoplasm
CL28460.Contig4_DB	3	42.76	61.7	38.32	47.5933	13.23	18.08	25.86	19.0567	11.44	18.59	16.7	15.5767	CASP-like protein 1 OS=Brachypodium distachyon PE=2 SV=1	-	-	GO:0005886//plasma membrane;GO:0016021//integral to membrane
CL1170.Contig3_DB	3	30.62	33.9	14.56	26.36	0	7.46	13.98	7.14667	4.23	7.93	0	4.05333	--	GO:0016556//mRNA modification	GO:0016740//transferase activity	GO:0016020//membrane
CL18342.Contig2_DB	3	34.62	21.36	20.67	25.55	4.64	5.48	7.01	5.71	2.45	7.63	5.75	5.27667	--	-	-	-
CL8664.Contig2_DB	3	16.61	22.48	22.12	20.4033	6.17	8.89	13.47	9.51	10.19	7.07	7.59	8.28333	F-box/LRR-repeat protein At5g02910 OS=Arabidopsis thaliana GN=At5g02910 PE=2 SV=1	-	-	-
CL28677.Contig3_DB	3	32.98	19.15	29.58	27.2367	0.83	11.22	13.87	8.64	4.21	7.45	1.56	4.40667	--	-	-	-
CL8018.Contig1_DB	3	12.56	9	16.35	12.6367	12.37	7.26	5.98	8.53667	1.6	3.46	1.31	2.12333	--	-	-	-
CL15067.Contig1_DB	3	18.94	16.56	16.16	17.22	6.23	7.19	11.82	8.41333	6.42	6.85	7.12	6.79667	Vegetative cell wall protein gp1 OS=Chlamydomonas reinhardtii GN=GP1 PE=2 SV=1	-	-	GO:0009536//plastid
CL6637.Contig1_DB	3	17.76	13.87	11.84	14.49	1.57	1.75	6.07	3.13	1.48	3.76	3.08	2.77333	--	-	-	-
CL617.Contig2_DB	3	24.51	19.05	17.14	20.2333	6.89	7.44	13.46	9.26333	7.61	11.82	5.9	8.44333	Vegetative cell wall protein gp1 OS=Chlamydomonas reinhardtii GN=GP1 PE=2 SV=1	-	-	GO:0016023//cytoplasmic membrane-bounded vesicle
CL12989.Contig1_DB	3	77.66	77.78	68.15	74.53	28.8	29.63	45.09	34.5067	24.26	34.43	31.66	30.1167	Leucine-rich repeat extensin-like protein 5 OS=Arabidopsis thaliana GN=LRX5 PE=2 SV=2	GO:0051640//organelle localization	-	GO:0005737//cytoplasm
CL15334.Contig1_DB	3	38.13	31.14	45.49	38.2533	17.64	16.15	24.71	19.5	12.71	16.85	10.64	13.4	Protein XAP5 CIRCADIAN TIMEKEEPER OS=Oryza sativa subsp. japonica GN=XCT PE=2 SV=1	GO:0010162//seed dormancy process;GO:0009845//seed germination;GO:0010114//response to red light;GO:0042752//regulation of circadian rhythm;GO:0009933//meristem structural organization;GO:0010099//regulation of photomorphogenesis;GO:0009909//regulation of flower development;GO:0010228//vegetative to reproductive phase transition of meristem;GO:0009637//response to blue light;GO:0016567//protein u…	-	GO:0005634//nucleus
CL23700.Contig2_DB	3	5.11	17.74	13.6	12.15	3.9	7.16	4.1	5.05333	3.65	0.89	1.94	2.16	Calcium-dependent protein kinase 30 OS=Arabidopsis thaliana GN=CPK30 PE=1 SV=1	GO:0006468//protein phosphorylation;GO:0009738//abscisic acid mediated signaling pathway;GO:0019722//calcium-mediated signaling;GO:0009612//response to mechanical stimulus	GO:0005509//calcium ion binding;GO:0005524//ATP binding;GO:0005515//protein binding;GO:0004683//calmodulin-dependent protein kinase activity	GO:0005634//nucleus;GO:0005886//plasma membrane
CL17475.Contig2_DB	3	26.28	22.97	20.49	23.2467	9.54	10.21	10.27	10.0067	6.85	7.86	7.53	7.41333	Zinc finger AN1 and C2H2 domain-containing stress-associated protein 16 OS=Oryza sativa subsp. japonica GN=SAP16 PE=2 SV=2	-	GO:0003676//nucleic acid binding;GO:0008270//zinc ion binding	GO:0005634//nucleus
CL16357.Contig2_DB	3	146.38	112.29	118.7	125.79	35.39	55.11	45.86	45.4533	25.54	39.75	25.8	30.3633	F-box protein At1g70590 OS=Arabidopsis thaliana GN=At1g70590 PE=2 SV=1	-	-	GO:0005739//mitochondrion;GO:0009536//plastid
CL11761.Contig1_DB	3	37.72	27.56	33.17	32.8167	9.03	12.07	19.2	13.4333	9.69	10.33	6.89	8.97	E3 ubiquitin-protein ligase COP1 OS=Arabidopsis thaliana GN=COP1 PE=1 SV=2	-	GO:0016746//transferase activity, transferring acyl groups;GO:0000166//nucleotide binding	GO:0005634//nucleus
CL20294.Contig2_DB	3	85.39	136.09	30.08	83.8533	20.12	18.61	34.29	24.34	18.12	24.49	14.12	18.91	Formin-like protein 14 OS=Arabidopsis thaliana GN=FH14 PE=3 SV=3	-	-	-
CL20736.Contig6_DB	3	317.29	157.42	86.4	187.037	26.15	52.7	94.9	57.9167	51.52	100.64	50.65	67.6033	--	-	-	-
CL25189.Contig1_DB	3	468.11	397.71	152.81	339.543	98.21	125.94	179.38	134.51	139.55	170.93	106.46	138.98	Proline-rich receptor-like protein kinase PERK9 OS=Arabidopsis thaliana GN=PERK9 PE=2 SV=1	-	-	-
Unigene33034_DB	3	88.6	88.83	80.45	85.96	33.66	26.87	57.53	39.3533	31.42	40.26	26.43	32.7033	Serine/arginine-rich splicing factor RSZ23 OS=Oryza sativa subsp. japonica GN=RSZ23 PE=2 SV=1	GO:0000398//mRNA splicing, via spliceosome	GO:0003676//nucleic acid binding;GO:0008270//zinc ion binding;GO:0000166//nucleotide binding	GO:0005634//nucleus
CL7426.Contig1_DB	3	13.09	14.66	19.04	15.5967	7.07	7.91	8.68	7.88667	6.77	8.26	3.37	6.13333	DEAD-box ATP-dependent RNA helicase 20 OS=Oryza sativa subsp. japonica GN=Os01g0197200 PE=3 SV=2	-	GO:0008026//ATP-dependent helicase activity;GO:0003676//nucleic acid binding;GO:0005524//ATP binding	GO:0005634//nucleus;GO:0005829//cytosol
CL11833.Contig1_DB	3	37.99	38.89	41.83	39.57	12.43	0	6.75	6.39333	1.32	3.15	3.29	2.58667	--	-	-	-
Unigene45130_DB	3	12.58	14.4	13.3	13.4267	3.01	4.67	5.11	4.26333	6.02	5.15	3.04	4.73667	Nuclear-pore anchor OS=Arabidopsis thaliana GN=NUA PE=1 SV=1	GO:0033036;GO:0009908//flower development;GO:0048519//negative regulation of biological process;GO:0006913//nucleocytoplasmic transport;GO:0016482//cytoplasmic transport;GO:0071702;GO:0044765	GO:0005488//binding	GO:0005635//nuclear envelope;GO:0044444//cytoplasmic part
CL6826.Contig1_DB	3	31.24	22.74	32.6	28.86	9.82	14.57	14.53	12.9733	8.36	11.33	6.86	8.85	Golgin candidate 2 OS=Arabidopsis thaliana GN=GC2 PE=1 SV=1	-	-	-
CL2739.Contig3_DB	3	32.9	35.48	30.68	33.02	10.97	14.56	19.48	15.0033	9.46	15.63	8.3	11.13	F-box/LRR-repeat protein 4 OS=Arabidopsis thaliana GN=FBL4 PE=2 SV=1	GO:0006511//ubiquitin-dependent protein catabolic process;GO:0006486//protein glycosylation	-	-
CL17095.Contig1_DB	3	62.16	60.47	47.94	56.8567	25.95	18.97	22.42	22.4467	16.72	26.59	9.05	17.4533	--	GO:0006355//regulation of transcription, DNA-dependent	-	GO:0005634//nucleus
CL9508.Contig1_DB	3	106.9	81.32	86.37	91.53	41.93	44.65	59.34	48.64	44.16	45.58	22.27	37.3367	Transcription factor TCP20 OS=Arabidopsis thaliana GN=TCP20 PE=1 SV=1	-	-	-
CL7560.Contig8_DB	3	89.63	93.91	72.34	85.2933	17.58	13.49	40.2	23.7567	16.66	17.25	16.12	16.6767	Heat stress transcription factor C-2b OS=Oryza sativa subsp. japonica GN=HSFC2B PE=2 SV=1	GO:0006351//transcription, DNA-dependent	GO:0003677//DNA binding	-
CL2376.Contig1_DB	3	27.17	31.96	24.29	27.8067	11.4	6.6	14.14	10.7133	7.75	10.43	12.62	10.2667	Vegetative cell wall protein gp1 OS=Chlamydomonas reinhardtii GN=GP1 PE=2 SV=1	-	-	GO:0005777//peroxisome
CL10295.Contig4_DB	3	17.05	15.1	17.44	16.53	6.77	7.99	9.37	8.04333	7.72	6.07	6.99	6.92667	Arginine/serine-rich protein 45 OS=Arabidopsis thaliana GN=SR45 PE=1 SV=1	-	GO:0030246//carbohydrate binding	-
CL7849.Contig2_DB	3	28.92	25.03	14.55	22.8333	5.23	9.9	10.88	8.67	7.98	14.87	4.9	9.25	Exocyst complex component 5 OS=Oryza sativa subsp. japonica GN=SEC10 PE=2 SV=1	GO:0048278//vesicle docking;GO:0006887//exocytosis;GO:0015031//protein transport	-	GO:0005886//plasma membrane;GO:0000145//exocyst
CL12861.Contig1_DB	3	16.39	12.32	10.27	12.9933	2.43	3.34	4.11	3.29333	1.46	7.03	1.52	3.33667	--	-	-	-
CL26461.Contig1_DB	3	68.81	42.02	37.47	49.4333	29.63	38.55	42.57	36.9167	17.68	19.19	16.6	17.8233	Mitochondrial adenine nucleotide transporter ADNT1 OS=Arabidopsis thaliana GN=ADNT1 PE=2 SV=1	GO:0055085//transmembrane transport	-	GO:0005743//mitochondrial inner membrane;GO:0016021//integral to membrane
CL8863.Contig2_DB	3	19.21	13.09	10.07	14.1233	4.76	7.54	8.29	6.86333	5.24	5.63	4.42	5.09667	Methyl-CpG-binding domain-containing protein 8 OS=Arabidopsis thaliana GN=MBD8 PE=2 SV=1	-	GO:0003677//DNA binding;GO:0008270//zinc ion binding	GO:0005622//intracellular
CL20925.Contig1_DB	3	66.53	85.62	24.31	58.82	14.39	20.7	14.68	16.59	8.4	17.73	7.67	11.2667	Proline-rich receptor-like protein kinase PERK9 OS=Arabidopsis thaliana GN=PERK9 PE=2 SV=1	-	-	-
Unigene45173_DB	3	359.43	270.36	82.26	237.35	54.6	94.33	118.59	89.1733	85.81	96.31	50.3	77.4733	--	-	-	-
CL10553.Contig3_DB	3	17.85	14.94	16.56	16.45	7.97	5.81	10.41	8.06333	5.19	5.51	3.34	4.68	Protein pleiotropic regulatory locus 1 OS=Arabidopsis thaliana GN=PRL1 PE=1 SV=1	GO:0000278//mitotic cell cycle;GO:0048364//root development;GO:0009880//embryonic pattern specification;GO:0009749//response to glucose stimulus;GO:0050826//response to freezing;GO:0009755//hormone-mediated signaling pathway;GO:0048825//cotyledon development;GO:0050832//defense response to fungus;GO:0051301//cell division;GO:0042742//defense response to bacterium;GO:0045892//negative regulation o…	GO:0005515//protein binding;GO:0000166//nucleotide binding	GO:0080008//Cul4-RING ubiquitin ligase complex;GO:0005634//nucleus
Unigene31778_DB	3	133.2	85.92	76.06	98.3933	26.99	51.86	90.2	56.35	16.58	18.4	4.23	13.07	Tonoplast dicarboxylate transporter OS=Arabidopsis thaliana GN=TDT PE=2 SV=2	GO:0071423//malate transmembrane transport;GO:0006814//sodium ion transport	GO:0015140//malate transmembrane transporter activity	GO:0005773//vacuole;GO:0016020//membrane
Unigene12088_DB	3	119.46	114.34	32.04	88.6133	17.08	31.65	41.97	30.2333	23.36	30.65	24.48	26.1633	--	-	-	-
CL3236.Contig1_DB	3	16.77	16.87	12.03	15.2233	3.59	5.9	9.37	6.28667	4.77	3.5	6.52	4.93	--	GO:0008152//metabolic process	GO:0016787//hydrolase activity;GO:0008270//zinc ion binding	-
CL8082.Contig2_DB	3	27.15	24.47	29.83	27.15	8.98	22.86	31.77	21.2033	8.24	15.55	9.87	11.22	Formin-like protein 7 OS=Oryza sativa subsp. japonica GN=FH7 PE=2 SV=2	-	-	-
Unigene37718_DB	3	19.32	14.06	18.99	17.4567	5	1.53	10.84	5.79	4.62	8.27	3.45	5.44667	--	-	-	-
CL5299.Contig2_DB	3	104.61	89.66	58.35	84.2067	24.21	44.25	76.43	48.2967	21.16	26.05	7.71	18.3067	Tonoplast dicarboxylate transporter OS=Arabidopsis thaliana GN=TDT PE=2 SV=2	GO:0071423//malate transmembrane transport;GO:0006814//sodium ion transport	GO:0015140//malate transmembrane transporter activity	GO:0005773//vacuole;GO:0016020//membrane
CL4066.Contig2_DB	3	12.17	12.39	14.82	13.1267	6.34	5.08	3.89	5.10333	2.97	2.52	0	1.83	--	-	-	-
CL29437.Contig2_DB	3	40.43	47.54	40.19	42.72	8.25	26.6	24.4	19.75	5.93	13.97	20.68	13.5267	Paired amphipathic helix protein Sin3-like 4 OS=Arabidopsis thaliana GN=SNL4 PE=3 SV=3	-	-	-
CL1365.Contig2_DB	3	13.84	13.58	8.49	11.97	4.08	11.49	12.26	9.27667	2.72	4.51	2.23	3.15333	Probable methyltransferase PMT27 OS=Arabidopsis thaliana GN=At3g51070 PE=3 SV=1	-	-	GO:0043231//intracellular membrane-bounded organelle
CL6088.Contig1_DB	3	12.65	10.61	11.79	11.6833	3.97	5.24	5.98	5.06333	2.25	4.92	5.14	4.10333	Protein tesmin/TSO1-like CXC 5 OS=Arabidopsis thaliana GN=TCX5 PE=1 SV=1	-	-	-
CL23523.Contig1_DB	3	43.14	43.93	37.05	41.3733	27.23	30.26	36.03	31.1733	14.68	17.65	15.74	16.0233	Zinc finger CCCH domain-containing protein 32 OS=Oryza sativa subsp. japonica GN=Os04g0671800 PE=2 SV=1	GO:0006355//regulation of transcription, DNA-dependent;GO:0009734//auxin mediated signaling pathway	GO:0008270//zinc ion binding;GO:0003677//DNA binding;GO:0046983//protein dimerization activity	GO:0009536//plastid;GO:0005634//nucleus
CL21596.Contig2_DB	3	16.31	17.78	13.81	15.9667	6.33	11.44	13.06	10.2767	6.97	6	6.82	6.59667	Proline-rich receptor-like protein kinase PERK4 OS=Arabidopsis thaliana GN=PERK4 PE=1 SV=1	GO:0032259//methylation;GO:0006508//proteolysis	GO:0008168//methyltransferase activity;GO:0008233//peptidase activity	GO:0005794//Golgi apparatus
CL15164.Contig3_DB	3	18.85	21.95	13.49	18.0967	3.01	4.93	5.3	4.41333	0	0	0	0	Histone-lysine N-methyltransferase ATXR6 OS=Arabidopsis thaliana GN=ATXR6 PE=2 SV=1	-	-	-
Unigene5485_DB	3	261.01	211.64	52.68	175.11	27.87	53.99	80.66	54.1733	42.62	66.84	36.81	48.7567	Extensin OS=Nicotiana tabacum GN=HRGPNT3 PE=2 SV=1	-	-	-
Unigene18654_DB	3	157.19	193.71	75.88	142.26	35.14	56.04	73.83	55.0033	34.83	73.49	35.53	47.95	E3 ubiquitin-protein ligase RGLG1 OS=Arabidopsis thaliana GN=RGLG1 PE=1 SV=1	GO:0009850//auxin metabolic process;GO:0080148//negative regulation of response to water deprivation;GO:0009690//cytokinin metabolic process	GO:0046872//metal ion binding;GO:0004842//ubiquitin-protein ligase activity	GO:0016023//cytoplasmic membrane-bounded vesicle;GO:0005886//plasma membrane
CL3650.Contig1_DB	3	39.87	38.28	44.34	40.83	12	11.89	17.32	13.7367	9.48	13.18	6.98	9.88	--	-	-	-
CL7411.Contig6_DB	3	19.12	16.24	16.35	17.2367	5.45	8.51	8.98	7.64667	6.33	5.23	4.04	5.2	--	GO:0007275//multicellular organismal development;GO:0042372//phylloquinone biosynthetic process	GO:0047617//acyl-CoA hydrolase activity	GO:0005777//peroxisome;GO:0009507//chloroplast
CL9093.Contig1_DB	3	71.18	61.59	69.08	67.2833	23.98	27.57	42.15	31.2333	25.31	25.95	18.02	23.0933	Probable S-acyltransferase At3g26935 OS=Arabidopsis thaliana GN=At3g26935 PE=1 SV=1	-	GO:0008270//zinc ion binding;GO:0016740//transferase activity	GO:0005886//plasma membrane
CL1395.Contig1_DB	3	25.2	14.34	24.18	21.24	14.23	18.76	13.57	15.52	6.63	9.22	8.41	8.08667	Probable cytosolic iron-sulfur protein assembly protein CIAO1 homolog OS=Chlamydomonas reinhardtii GN=CHLREDRAFT_130093 PE=3 SV=1	GO:0010048//vernalization response;GO:0009086//methionine biosynthetic process;GO:0048573//photoperiodism, flowering;GO:0051604//protein maturation;GO:0000394//RNA splicing, via endonucleolytic cleavage and ligation;GO:0016573//histone acetylation;GO:0009793//embryo development ending in seed dormancy	GO:0000166//nucleotide binding;GO:0004402//histone acetyltransferase activity	GO:0005834//heterotrimeric G-protein complex;GO:0005737//cytoplasm
CL12037.Contig2_DB	3	37.25	35.15	42.54	38.3133	16.27	26.08	21.5	21.2833	15.02	13.53	16.63	15.06	ARM REPEAT PROTEIN INTERACTING WITH ABF2 OS=Arabidopsis thaliana GN=ARIA PE=1 SV=2	GO:0042127//regulation of cell proliferation;GO:0009737//response to abscisic acid stimulus;GO:0010187//negative regulation of seed germination;GO:0009651//response to salt stress	-	GO:0005886//plasma membrane;GO:0031261//DNA replication preinitiation complex
CL16489.Contig1_DB	3	58.04	62.64	67.02	62.5667	32.99	49.76	54	45.5833	25.06	22.03	24.83	23.9733	Formin-like protein 3 OS=Oryza sativa subsp. japonica GN=FH3 PE=2 SV=2	-	-	-
Unigene41536_DB	3	22.95	40.31	22.6	28.62	8.45	12.48	15.3	12.0767	8.7	11.74	11.96	10.8	F-box/LRR-repeat protein 3 OS=Arabidopsis thaliana GN=FBL3 PE=2 SV=1	-	-	GO:0005886//plasma membrane
Unigene3853_DB	3	12.28	13.79	13.4	13.1567	5.42	4.79	8.17	6.12667	2.56	3.42	5.78	3.92	--	GO:0000956//nuclear-transcribed mRNA catabolic process	-	GO:0009536//plastid
CL13459.Contig1_DB	3	11.45	15.83	16	14.4267	7.71	7.14	7.03	7.29333	6.06	5.71	2.98	4.91667	Histone deacetylase HDT2 OS=Zea mays GN=HDT2 PE=1 SV=1	-	-	-
CL6429.Contig10_DB	3	8.16	10.71	11.94	10.27	3.12	5.75	4.36	4.41	3.72	3.46	1.42	2.86667	--	-	-	-
CL12450.Contig3_DB	3	82.83	93.82	76.43	84.36	39.18	38.21	57.79	45.06	30.27	39.74	32.48	34.1633	Protein PHR1-LIKE 1 OS=Arabidopsis thaliana GN=PHL1 PE=1 SV=1	-	GO:0003677//DNA binding;GO:0003682//chromatin binding	-
CL7037.Contig1_DB	3	156.48	147.73	140.77	148.327	32.72	60.26	91.86	61.6133	47.85	69.57	38.62	52.0133	Probable S-acyltransferase At3g26935 OS=Arabidopsis thaliana GN=At3g26935 PE=1 SV=1	-	GO:0008270//zinc ion binding;GO:0016740//transferase activity	GO:0005886//plasma membrane
Unigene43213_DB	3	16.17	15.41	7.91	13.1633	4.83	4.9	5.22	4.98333	3.36	4.42	5.7	4.49333	--	-	-	GO:0005634//nucleus;GO:0009507//chloroplast
Unigene35512_DB	3	28.62	35.05	28.29	30.6533	14.78	14.04	13.25	14.0233	10.45	8.23	11.58	10.0867	--	GO:0006355//regulation of transcription, DNA-dependent;GO:0016573//histone acetylation	GO:0003712//transcription cofactor activity;GO:0008270//zinc ion binding;GO:0004222//metalloendopeptidase activity;GO:0004402//histone acetyltransferase activity	GO:0009507//chloroplast;GO:0005634//nucleus
Unigene31868_DB	3	26.6	38.3	35.05	33.3167	11.89	20.23	16.39	16.17	14.13	5.39	13.37	10.9633	Vegetative cell wall protein gp1 OS=Chlamydomonas reinhardtii GN=GP1 PE=2 SV=1	-	GO:0003824//catalytic activity	-
CL22509.Contig1_DB	3	79.61	54.71	40.04	58.12	25.87	43.67	55.32	41.62	25.09	27.61	19.56	24.0867	--	-	-	GO:0043231//intracellular membrane-bounded organelle
CL11749.Contig2_DB	3	139.93	158.73	73.09	123.917	25.66	47.02	30.58	34.42	16.96	36.31	16.8	23.3567	KH domain-containing protein At4g26480 OS=Arabidopsis thaliana GN=At4g26480 PE=2 SV=1	-	GO:0003723//RNA binding	GO:0005739//mitochondrion
CL3024.Contig8_DB	3	16.14	20.67	16.3	17.7033	6.42	7.19	5.58	6.39667	4.33	7.56	10.41	7.43333	--	-	-	-
CL6352.Contig1_DB	3	126.5	143.03	122.19	130.573	51.92	57.66	70.76	60.1133	41.19	41.18	35.23	39.2	Mitochondrial import inner membrane translocase subunit TIM50 OS=Phytophthora infestans GN=TIM50 PE=2 SV=1	GO:0016311//dephosphorylation	GO:0016791//phosphatase activity	-
CL8772.Contig5_DB	3	15.81	17.78	23.87	19.1533	7.41	12.85	10.17	10.1433	1.41	2.57	1.59	1.85667	Inactive poly [ADP-ribose] polymerase RCD1 OS=Arabidopsis thaliana GN=RCD1 PE=1 SV=1	-	GO:0003950//NAD+ ADP-ribosyltransferase activity	-
CL17611.Contig2_DB	3	48.96	42.79	46.38	46.0433	33.28	29.69	39.31	34.0933	16.79	24.46	15.9	19.05	--	-	-	-
CL3713.Contig1_DB	3	18.83	20.09	19.29	19.4033	7.45	8.45	11.52	9.14	6.4	6.05	6.05	6.16667	--	-	-	-
CL13748.Contig2_DB	3	58.81	68.11	50.63	59.1833	32.33	46.65	42.28	40.42	21.98	25.71	25.74	24.4767	Tubby-like F-box protein 9 OS=Oryza sativa subsp. japonica GN=TULP9 PE=2 SV=1	-	-	-
CL1390.Contig3_DB	3	28.01	21.14	12.98	20.71	8.13	11.33	11.81	10.4233	4.85	7.33	3.79	5.32333	Protein ARABIDILLO 1 OS=Arabidopsis thaliana GN=FBX5 PE=1 SV=1	GO:0048527//lateral root development	GO:0016874//ligase activity	GO:0005634//nucleus
CL14785.Contig1_DB	3	16.01	8.58	15	13.1967	8.65	4.68	9.28	7.53667	6.44	4.06	3.76	4.75333	Probable pre-mRNA-splicing factor ATP-dependent RNA helicase OS=Arabidopsis thaliana GN=At3g26560 PE=1 SV=2	GO:0000911//cytokinesis by cell plate formation;GO:0000226//microtubule cytoskeleton organization	GO:0008026//ATP-dependent helicase activity;GO:0003676//nucleic acid binding;GO:0005524//ATP binding	GO:0005634//nucleus
CL9736.Contig1_DB	3	33.31	17.51	20.74	23.8533	9.64	9.2	14.46	11.1	6.6	6.78	8.96	7.44667	Transcription factor MYB1R1 OS=Solanum tuberosum PE=2 SV=1	-	GO:0003676//nucleic acid binding	-
CL3585.Contig1_DB	3	40.28	47.1	41.07	42.8167	17.93	15.12	28.95	20.6667	18.53	17.48	18	18.0033	E3 ubiquitin-protein ligase CIP8 OS=Arabidopsis thaliana GN=CIP8 PE=1 SV=1	-	GO:0008270//zinc ion binding	-
CL11993.Contig3_DB	3	32.89	24.5	23.72	27.0367	4.94	16.16	20.32	13.8067	8.78	9.5	12.07	10.1167	Ribosomal protein S10, mitochondrial OS=Pisum sativum GN=RPS10 PE=2 SV=1	GO:0006412//translation	GO:0003735//structural constituent of ribosome	GO:0005840//ribosome;GO:0005739//mitochondrion
CL19494.Contig2_DB	3	48.79	58.48	62.84	56.7033	27.49	43.31	42.24	37.68	19.67	22.88	22.11	21.5533	Mitogen-activated protein kinase kinase kinase 1 OS=Arabidopsis thaliana GN=MEKK1 PE=1 SV=2	GO:0009651//response to salt stress;GO:0009409//response to cold;GO:0009611//response to wounding;GO:0000186//activation of MAPKK activity;GO:0046686//response to cadmium ion	GO:0019900//kinase binding;GO:0003677//DNA binding;GO:0005524//ATP binding;GO:0004709//MAP kinase kinase kinase activity	GO:0005634//nucleus
CL5954.Contig2_DB	3	13.66	33.32	16.77	21.25	8.24	11.15	15.47	11.62	4.52	1.2	2.51	2.74333	--	-	-	-
CL9342.Contig1_DB	3	32.83	29.99	26.31	29.71	11.8	14.53	22.15	16.16	13.37	12.6	10.37	12.1133	Heat shock protein STI OS=Glycine max GN=STI PE=2 SV=1	-	GO:0051879//Hsp90 protein binding	GO:0005737//cytoplasm
CL2376.Contig2_DB	3	23.99	37.41	21.99	27.7967	11.56	11.24	18.41	13.7367	7.83	9.9	11.26	9.66333	Vegetative cell wall protein gp1 OS=Chlamydomonas reinhardtii GN=GP1 PE=2 SV=1	-	-	GO:0005777//peroxisome
Unigene37996_DB	3	26.32	33.04	21.14	26.8333	8.52	11.22	16.12	11.9533	6.92	11.78	9.09	9.26333	--	-	-	-
CL8197.Contig1_DB	3	21.03	17.56	12.32	16.97	6.45	9.83	9.78	8.68667	5.55	7.04	4.6	5.73	DEAD-box ATP-dependent RNA helicase 16 OS=Oryza sativa subsp. japonica GN=Os03g0728800 PE=2 SV=1	-	GO:0003723//RNA binding;GO:0005524//ATP binding;GO:0008026//ATP-dependent helicase activity	-
CL111.Contig3_DB	3	25.6	31.11	24.53	27.08	9.63	10.17	12.11	10.6367	7.26	11	9.82	9.36	Probable receptor-like protein kinase At5g15080 OS=Arabidopsis thaliana GN=At5g15080 PE=1 SV=1	GO:0006468//protein phosphorylation;GO:0000165//MAPK cascade	GO:0004674//protein serine/threonine kinase activity;GO:0005524//ATP binding	GO:0005886//plasma membrane
CL14773.Contig4_DB	3	802.72	772.23	220.23	598.393	155.5	216.19	427.95	266.547	177.01	247	180.05	201.353	--	-	-	-
CL1825.Contig1_DB	3	15.54	25.92	34.37	25.2767	6.23	10.96	15.69	10.96	10.42	10.73	7.62	9.59	--	-	-	-
CL4042.Contig1_DB	3	33.37	52.74	27.03	37.7133	11.77	10.53	16.64	12.98	7.4	11	10.41	9.60333	Proline-rich receptor-like protein kinase PERK8 OS=Arabidopsis thaliana GN=PERK8 PE=1 SV=1	-	-	-
CL3310.Contig2_DB	3	52.92	93	91.69	79.2033	34.25	40.08	36.45	36.9267	26.2	32.69	25.31	28.0667	Vegetative cell wall protein gp1 OS=Chlamydomonas reinhardtii GN=GP1 PE=2 SV=1	-	GO:0008270//zinc ion binding	-
CL787.Contig7_DB	3	376.97	154.73	140.26	223.987	71.85	92.23	189.75	117.943	57.64	92.34	30.31	60.0967	Probable mediator of RNA polymerase II transcription subunit 37e OS=Arabidopsis thaliana GN=MED37E PE=1 SV=3	GO:0006950//response to stress;GO:0055114//oxidation-reduction process	GO:0032440//2-alkenal reductase [NAD(P)] activity;GO:0005524//ATP binding	-
CL6067.Contig1_DB	3	63.22	43.61	52.54	53.1233	29.68	30.97	36.67	32.44	21.9	22.33	19.04	21.09	Protein VERNALIZATION INSENSITIVE 3 OS=Arabidopsis thaliana GN=VIN3 PE=2 SV=2	GO:0044699	-	-
CL15637.Contig3_DB	3	16.22	14.39	14.44	15.0167	5.21	4.58	10.82	6.87	4.74	5.15	5.78	5.22333	Leucine-rich repeat extensin-like protein 5 OS=Arabidopsis thaliana GN=LRX5 PE=2 SV=2	-	-	-
CL29220.Contig2_DB	3	23.99	25.91	18.44	22.78	7.06	8.39	11.97	9.14	7.34	9.96	8.34	8.54667	Zinc finger CCCH domain-containing protein 5 OS=Oryza sativa subsp. japonica GN=Os01g0257400 PE=2 SV=1	-	GO:0003676//nucleic acid binding;GO:0008270//zinc ion binding	-
CL6433.Contig11_DB	3	58.9	50.78	61.9	57.1933	6.9	10.68	12.22	9.93333	12.91	3.12	6.49	7.50667	--	-	-	-
CL24792.Contig1_DB	3	27.6	22.52	29.43	26.5167	11.75	13.47	17.51	14.2433	10.8	13.01	7.6	10.47	--	GO:0048316//seed development;GO:0030244//cellulose biosynthetic process;GO:0016125//sterol metabolic process;GO:0009631//cold acclimation;GO:0030259//lipid glycosylation	GO:0051507//beta-sitosterol UDP-glucosyltransferase activity	GO:0005886//plasma membrane
CL1579.Contig1_DB	3	24.61	22.91	17.95	21.8233	12.2	12.65	14.42	13.09	8.05	9.02	7.38	8.15	Glycine-rich RNA-binding protein 5, mitochondrial OS=Arabidopsis thaliana GN=RBG5 PE=2 SV=1	GO:0006397//mRNA processing	GO:0003676//nucleic acid binding;GO:0000166//nucleotide binding	-
CL12174.Contig1_DB	3	76.8	76.79	62.58	72.0567	24.42	28.3	53.39	35.37	22.79	32.15	18.15	24.3633	Proline-rich receptor-like protein kinase PERK10 OS=Arabidopsis thaliana GN=PERK10 PE=1 SV=2	-	-	-
CL22311.Contig1_DB	3	39.12	32.42	33.85	35.13	12.25	12.59	16.04	13.6267	8.94	10.92	7.13	8.99667	Heterogeneous nuclear ribonucleoprotein 1 OS=Arabidopsis thaliana GN=RNP1 PE=1 SV=1	-	GO:0003676//nucleic acid binding	GO:0044424//intracellular part
CL17289.Contig5_DB	3	23	19.39	13.91	18.7667	4.93	7.98	11.21	8.04	7.76	9.23	2.51	6.5	--	-	-	-
CL8202.Contig3_DB	3	21.26	23.15	19.62	21.3433	6.83	8.38	7.69	7.63333	7.91	10.16	6.44	8.17	--	-	-	-
CL8998.Contig1_DB	3	14.58	11.51	10.72	12.27	3.85	5.51	10.28	6.54667	5.72	4.99	1.87	4.19333	Protein kinase G11A OS=Oryza sativa subsp. japonica GN=Os06g0291600 PE=2 SV=1	GO:0006468//protein phosphorylation;GO:0043069//negative regulation of programmed cell death	GO:0004674//protein serine/threonine kinase activity;GO:0005524//ATP binding;GO:0005515//protein binding	GO:0005634//nucleus;GO:0005886//plasma membrane
CL18465.Contig1_DB	3	26.72	20.4	19.58	22.2333	11.09	7.14	13.56	10.5967	7.28	7.5	8.29	7.69	Arginine/serine-rich protein 45 OS=Arabidopsis thaliana GN=SR45 PE=1 SV=1	GO:0008152//metabolic process	GO:0008080//N-acetyltransferase activity	GO:0005737//cytoplasm
CL4456.Contig1_DB	3	44.9	41.39	34.87	40.3867	12.81	17.06	29.48	19.7833	12.63	19.21	13.16	15	Coleoptile phototropism protein 1 OS=Oryza sativa subsp. japonica GN=CPT1 PE=2 SV=1	GO:0009785//blue light signaling pathway;GO:0016567//protein ubiquitination;GO:0009638//phototropism	GO:0004871//signal transducer activity	-
CL21211.Contig1_DB	3	51.31	67.96	47.32	55.53	2.42	17.24	17.97	12.5433	5.97	9.45	3.2	6.20667	Formin-like protein 1 OS=Oryza sativa subsp. japonica GN=FH1 PE=2 SV=1	-	-	-
CL3189.Contig3_DB	3	52.23	69.26	52.84	58.11	27.41	30.88	27.21	28.5	6.71	13.16	20.9	13.59	BTB/POZ and TAZ domain-containing protein 2 OS=Arabidopsis thaliana GN=BT2 PE=1 SV=1	GO:0006355//regulation of transcription, DNA-dependent;GO:0009743//response to carbohydrate stimulus;GO:0009553//embryo sac development;GO:0007623//circadian rhythm;GO:0009733//response to auxin stimulus;GO:0051973//positive regulation of telomerase activity;GO:0009555//pollen development;GO:0010167//response to nitrate;GO:0080134//regulation of response to stress;GO:0016573//histone acetylation	GO:0003712//transcription cofactor activity;GO:0008270//zinc ion binding;GO:0004402//histone acetyltransferase activity	GO:0005737//cytoplasm;GO:0005634//nucleus
Unigene33020_DB	3	55.81	67.82	42.51	55.38	29.47	38.59	40.12	36.06	16.39	25.18	18.79	20.12	--	-	GO:0003676//nucleic acid binding	GO:0043231//intracellular membrane-bounded organelle
CL8202.Contig1_DB	3	24.96	28.05	22.22	25.0767	4.88	10.76	13.78	9.80667	6.78	10.57	6.56	7.97	--	-	-	-
Unigene36003_DB	3	32.04	28.2	9.91	23.3833	4.29	8.11	7.77	6.72333	1.88	2.47	4.15	2.83333	--	-	-	GO:0009536//plastid
CL18049.Contig1_DB	3	34.14	38.54	30.24	34.3067	11.14	23.06	16.44	16.88	8.44	9.31	9.73	9.16	--	-	GO:0003676//nucleic acid binding	GO:0016604//nuclear body;GO:0005730//nucleolus;GO:0030529//ribonucleoprotein complex
CL16289.Contig2_DB	3	14.79	20.85	22.34	19.3267	8.24	8.54	13.33	10.0367	8.05	8.67	7.92	8.21333	WAT1-related protein At3g45870 OS=Arabidopsis thaliana GN=At3g45870 PE=2 SV=1	-	-	GO:0009507//chloroplast;GO:0016020//membrane
CL11836.Contig3_DB	3	15.17	23.58	14.43	17.7267	11.24	13.76	11.6	12.2	5.82	1.39	7.53	4.91333	F-box/LRR-repeat protein 17 OS=Arabidopsis thaliana GN=FBL17 PE=1 SV=1	GO:0009790//embryo development;GO:0009555//pollen development;GO:0055047//generative cell mitosis;GO:0048316//seed development	-	GO:0009536//plastid
CL1484.Contig3_DB	3	54.65	37.16	34.25	42.02	15.62	27.48	38.79	27.2967	10.43	16.37	8.42	11.74	--	-	-	-
CL19699.Contig1_DB	3	105.84	131.46	96.68	111.327	35.03	48.59	64.46	49.36	41.83	45.52	36	41.1167	Mitogen-activated protein kinase kinase kinase ANP1 OS=Arabidopsis thaliana GN=ANP1 PE=1 SV=2	GO:0006468//protein phosphorylation	GO:0004672//protein kinase activity;GO:0005524//ATP binding	-
CL12507.Contig1_DB	3	8.03	11.31	14.75	11.3633	3.95	5.09	3.83	4.29	4.01	1.48	2.49	2.66	Probable solanesyl-diphosphate synthase 3, chloroplastic (Fragment) OS=Oryza sativa subsp. japonica GN=SPS3 PE=3 SV=1	GO:0008299//isoprenoid biosynthetic process;GO:0006744//ubiquinone biosynthetic process;GO:0015979//photosynthesis	GO:0052923;GO:0046872//metal ion binding;GO:0000010//trans-hexaprenyltranstransferase activity;GO:0050347//trans-octaprenyltranstransferase activity	GO:0009507//chloroplast;GO:0005783//endoplasmic reticulum
Unigene33200_DB	3	58.47	48.33	47.74	51.5133	20.79	31.46	30.82	27.69	14.1	20.28	14.9	16.4267	5'-adenylylsulfate reductase-like 6 OS=Oryza sativa subsp. japonica GN=APRL6 PE=2 SV=1	-	-	-
CL1873.Contig4_DB	3	63.47	59.73	60.01	61.07	22.7	25.99	33.3	27.33	17.61	18.27	17.01	17.63	Formin-like protein 18 OS=Oryza sativa subsp. japonica GN=FH18 PE=2 SV=1	GO:0009987//cellular process	GO:0003676//nucleic acid binding;GO:0000166//nucleotide binding	-
CL4386.Contig2_DB	3	39.23	40.13	38.68	39.3467	10.41	16.85	18.42	15.2267	9.14	10.66	7.06	8.95333	Cyclin-dependent kinase G-2 OS=Oryza sativa subsp. japonica GN=CDKG-2 PE=2 SV=2	GO:0007049//cell cycle;GO:0006468//protein phosphorylation	GO:0004693//cyclin-dependent protein kinase activity;GO:0008353//RNA polymerase II carboxy-terminal domain kinase activity;GO:0005524//ATP binding	-
CL4736.Contig1_DB	3	38.83	20.17	25.99	28.33	13.14	16.14	17.14	15.4733	12.09	12.2	9.44	11.2433	DNA-directed RNA polymerase E subunit 1 OS=Arabidopsis thaliana GN=NRPE1 PE=1 SV=1	GO:0016458//gene silencing;GO:0006259//DNA metabolic process;GO:0016070//RNA metabolic process;GO:0034645//cellular macromolecule biosynthetic process;GO:0040029//regulation of gene expression, epigenetic	GO:0005488//binding	GO:0044428//nuclear part
Unigene39328_DB	3	24.77	30.93	22.24	25.98	5.35	10.38	15.2	10.31	8.32	7.86	7.67	7.95	Guanine nucleotide-binding protein alpha-2 subunit OS=Glycine max GN=GPA2 PE=2 SV=1	GO:0009750//response to fructose stimulus;GO:0009630//gravitropism;GO:0009749//response to glucose stimulus;GO:0009744//response to sucrose stimulus;GO:2000067//regulation of root morphogenesis;GO:0006184//GTP catabolic process;GO:0009652//thigmotropism;GO:0009737//response to abscisic acid stimulus;GO:0007188//adenylate cyclase-modulating G-protein coupled receptor signaling pathway;GO:0010555//…	GO:0004871//signal transducer activity;GO:0005525//GTP binding;GO:0031683//G-protein beta/gamma-subunit complex binding;GO:0001664//G-protein coupled receptor binding;GO:0003924//GTPase activity	GO:0005834//heterotrimeric G-protein complex;GO:0005634//nucleus
CL19238.Contig2_DB	3	61.82	68.19	47.3	59.1033	20.52	32.47	38.56	30.5167	22.91	30.18	20.4	24.4967	Probable phosphatidylinositol 4-kinase type 2-beta At1g26270 OS=Arabidopsis thaliana GN=At1g26270 PE=1 SV=1	-	GO:0016773//phosphotransferase activity, alcohol group as acceptor	-
Unigene39729_DB	3	79.23	69.08	74.99	74.4333	35.4	41.56	54.25	43.7367	27.31	35.41	26.97	29.8967	BTB/POZ domain-containing protein POB1 OS=Arabidopsis thaliana GN=POB1 PE=2 SV=2	-	-	-
Unigene35805_DB	3	15.23	11.05	7.85	11.3767	3.65	1.67	7.66	4.32667	3.22	3.26	0.38	2.28667	Cyclin-dependent kinase inhibitor 3 OS=Oryza sativa subsp. japonica GN=KRP3 PE=2 SV=2	GO:0044763	-	-
Unigene4145_DB	3	32.19	19.16	45.97	32.44	18.1	16.49	23.94	19.51	13.34	11.56	5.72	10.2067	Proline-rich receptor-like protein kinase PERK9 OS=Arabidopsis thaliana GN=PERK9 PE=2 SV=1	-	GO:0005515//protein binding	-
CL5594.Contig6_DB	3	55.84	42.77	56.52	51.71	26.93	37.09	35.88	33.3	23.85	23.28	16.18	21.1033	Pre-mRNA-processing protein 40A OS=Arabidopsis thaliana GN=PRP40A PE=1 SV=1	GO:0008380//RNA splicing	GO:0070063//RNA polymerase binding	GO:0016592//mediator complex;GO:0005829//cytosol
CL7240.Contig2_DB	3	164.78	151.21	138.39	151.46	61.93	96.68	107.51	88.7067	59.36	68.04	60.79	62.73	Eukaryotic translation initiation factor NCBP OS=Triticum aestivum GN=NCBP PE=2 SV=1	GO:0006413//translational initiation;GO:0006417//regulation of translation	GO:0003743//translation initiation factor activity	GO:0005737//cytoplasm
CL22666.Contig2_DB	3	11.74	14.93	14.27	13.6467	3.98	6.52	9.94	6.81333	7.4	3.88	5.12	5.46667	--	-	-	-
CL20183.Contig1_DB	3	23.85	24.71	20.76	23.1067	13.3	15.69	11.92	13.6367	8.22	13.37	6.98	9.52333	Protein argonaute 2 OS=Oryza sativa subsp. japonica GN=AGO2 PE=2 SV=2	-	-	-
CL14600.Contig1_DB	3	10.14	11.06	12.38	11.1933	4.42	3.54	5.53	4.49667	0	2.5	1.81	1.43667	--	-	-	-
CL3787.Contig3_DB	3	47.9	43.64	41.83	44.4567	13.86	27.64	34.2	25.2333	15.68	21	14.54	17.0733	Casein kinase II subunit beta OS=Arabidopsis thaliana GN=CKB1 PE=1 SV=1	GO:0042753//positive regulation of circadian rhythm;GO:0045859//regulation of protein kinase activity;GO:0048573//photoperiodism, flowering	GO:0004674//protein serine/threonine kinase activity;GO:0008134//transcription factor binding;GO:0019887//protein kinase regulator activity	GO:0005956//protein kinase CK2 complex;GO:0005737//cytoplasm;GO:0005634//nucleus
Unigene36298_DB	3	164.9	177.87	60.54	134.437	38.23	59.16	104.25	67.2133	53.9	33.81	29.57	39.0933	--	-	-	-
CL18825.Contig1_DB	3	266.89	466.36	266.53	333.26	93.21	134.48	301.89	176.527	29.39	43.52	72.16	48.3567	Protein CCA1 OS=Arabidopsis thaliana GN=CCA1 PE=1 SV=1	-	GO:0003677//DNA binding;GO:0003682//chromatin binding	-
CL11909.Contig3_DB	3	17.03	12.7	16.88	15.5367	10.63	10.63	14.11	11.79	5.3	4.88	4.53	4.90333	Leucine-rich repeat-containing protein ODA7 OS=Chlamydomonas reinhardtii GN=ODA7 PE=1 SV=1	GO:0009560//embryo sac egg cell differentiation	-	-
CL1886.Contig2_DB	3	29.4	27.09	26.98	27.8233	5.15	12.28	18.3	11.91	5.34	7.92	5.43	6.23	Nucleolin 2 OS=Oryza sativa subsp. japonica GN=Os04g0620700 PE=2 SV=2	-	-	-
CL1642.Contig2_DB	3	90.11	50.28	74.84	71.7433	50.83	46.51	46.26	47.8667	28.8	33.23	21.67	27.9	Gibberellin 20 oxidase 2 OS=Oryza sativa subsp. japonica GN=20ox2 PE=1 SV=1	GO:0044710	GO:0016706//oxidoreductase activity, acting on paired donors, with incorporation or reduction of molecular oxygen, 2-oxoglutarate as one donor, and incorporation of one atom each of oxygen into both donors	-
CL9443.Contig1_DB	3	10.12	10.3	12.11	10.8433	5.11	4.16	6.94	5.40333	3.01	4.48	2.71	3.4	Katanin p80 WD40 repeat-containing subunit B1 homolog OS=Arabidopsis thaliana GN=At5g23430 PE=2 SV=3	GO:0007155//cell adhesion;GO:0044036//cell wall macromolecule metabolic process;GO:0045010//actin nucleation;GO:0042546//cell wall biogenesis;GO:0016926//protein desumoylation;GO:0010090//trichome morphogenesis;GO:0050665//hydrogen peroxide biosynthetic process;GO:0010228//vegetative to reproductive phase transition of meristem	GO:0005515//protein binding;GO:0016740//transferase activity	GO:0005737//cytoplasm;GO:0043234//protein complex
CL13645.Contig1_DB	3	19.92	22.45	18.29	20.22	8.48	9.2	7.38	8.35333	4.41	4.97	8.31	5.89667	Transcription factor bHLH93 OS=Arabidopsis thaliana GN=BHLH93 PE=1 SV=1	-	GO:0046983//protein dimerization activity	-
CL11233.Contig2_DB	3	11.3	20.3	22.45	18.0167	7.48	10.76	15.53	11.2567	4.41	3.52	2.14	3.35667	--	-	-	-
CL5156.Contig7_DB	3	46.68	48.04	47.97	47.5633	18.69	28.32	35.79	27.6	17.54	20.58	14.04	17.3867	LEC14B homolog OS=Prunus armeniaca PE=2 SV=1	-	GO:0000166//nucleotide binding	GO:0080008//Cul4-RING ubiquitin ligase complex;GO:0005737//cytoplasm
CL13425.Contig1_DB	3	20.42	31.24	22.88	24.8467	9.05	13.58	17.23	13.2867	7.5	13.49	8.93	9.97333	--	-	-	-
CL11614.Contig2_DB	3	102.97	101.01	99.12	101.033	47.03	51.79	65.73	54.85	33.97	34.42	31.92	33.4367	Adagio-like protein 1 OS=Oryza sativa subsp. japonica GN=Os06g0694000 PE=2 SV=1	GO:0009785//blue light signaling pathway;GO:0010498//proteasomal protein catabolic process;GO:0010114//response to red light;GO:0006355//regulation of transcription, DNA-dependent;GO:0018298//protein-chromophore linkage;GO:0009908//flower development;GO:0043153//entrainment of circadian clock by photoperiod;GO:0016567//protein ubiquitination	GO:0009882//blue light photoreceptor activity	GO:0005829//cytosol;GO:0019005//SCF ubiquitin ligase complex;GO:0005634//nucleus
CL9175.Contig1_DB	3	39.03	53.52	36.41	42.9867	20.84	25.28	23.69	23.27	4.38	15.21	4.4	7.99667	--	-	-	-
CL19031.Contig2_DB	3	25.3	27.39	21.75	24.8133	8.89	11.61	15.89	12.13	3.48	13.05	4.34	6.95667	--	-	-	-
CL5385.Contig6_DB	3	51.63	56.44	48.04	52.0367	15.05	29.7	48.87	31.2067	15.95	23.21	14.72	17.96	--	GO:0043631//RNA polyadenylation	GO:0003723//RNA binding;GO:0004652//polynucleotide adenylyltransferase activity	GO:0005634//nucleus
Unigene819_DB	3	19.87	19.35	22.48	20.5667	5.94	8.93	15.12	9.99667	7.4	6.42	3.61	5.81	--	-	-	-
CL4128.Contig3_DB	3	28.13	33.11	24.68	28.64	11.37	13.58	12.15	12.3667	8.65	9.68	14.75	11.0267	Regulatory protein NPR1 OS=Arabidopsis thaliana GN=NPR1 PE=1 SV=1	GO:0006952//defense response;GO:0051707//response to other organism	-	GO:0044424//intracellular part
CL10185.Contig1_DB	3	69.48	83.73	60.67	71.2933	23.29	29.2	37.41	29.9667	18.68	18.23	14.54	17.15	Protein DEHYDRATION-INDUCED 19 homolog 2 OS=Oryza sativa subsp. japonica GN=DI19-2 PE=2 SV=2	-	GO:0008270//zinc ion binding	GO:0005622//intracellular
CL2403.Contig6_DB	3	39.51	36.57	29.91	35.33	15.51	17.03	30.4	20.98	15	15.79	13.7	14.83	Probable ADP-ribosylation factor GTPase-activating protein AGD14 OS=Arabidopsis thaliana GN=AGD14 PE=1 SV=2	GO:0032312//regulation of ARF GTPase activity	GO:0008270//zinc ion binding;GO:0008060//ARF GTPase activator activity	-
CL2138.Contig4_DB	3	67.12	54.81	46.99	56.3067	24.41	25.31	33.3	27.6733	12.71	28.22	16.65	19.1933	Vesicle transport v-SNARE 13 OS=Arabidopsis thaliana GN=VTI13 PE=2 SV=1	GO:0006623//protein targeting to vacuole;GO:0006944//cellular membrane fusion;GO:0016192//vesicle-mediated transport	-	GO:0005886//plasma membrane
CL14289.Contig2_DB	3	22.42	24.4	32.68	26.5	9.47	12.29	21.05	14.27	9.44	11.2	9.3	9.98	Transcription factor GTE10 OS=Arabidopsis thaliana GN=GTE10 PE=1 SV=2	-	-	-
CL7193.Contig2_DB	3	22.13	19.39	27.02	22.8467	6.12	9.09	16.43	10.5467	5.09	10.73	4.56	6.79333	--	-	-	-
CL12391.Contig2_DB	3	7.88	14.37	9.99	10.7467	5.52	2.07	6.79	4.79333	3.42	2.26	0	1.89333	Actin-depolymerizing factor 2 OS=Oryza sativa subsp. japonica GN=ADF2 PE=2 SV=1	GO:0030042//actin filament depolymerization	GO:0003779//actin binding	GO:0005737//cytoplasm;GO:0015629//actin cytoskeleton
CL4516.Contig6_DB	3	21.59	24.74	15.36	20.5633	8.76	12.99	20.29	14.0133	5.07	7.67	6.54	6.42667	5'-3' exoribonuclease 3 OS=Arabidopsis thaliana GN=XRN3 PE=2 SV=1	GO:0043247//telomere maintenance in response to DNA damage;GO:0009888//tissue development;GO:0006635//fatty acid beta-oxidation;GO:0031048//chromatin silencing by small RNA;GO:0010332//response to gamma radiation;GO:0007131//reciprocal meiotic recombination;GO:0010638//positive regulation of organelle organization;GO:0045132//meiotic chromosome segregation;GO:0016558//protein import into peroxiso…	GO:0008270//zinc ion binding;GO:0003676//nucleic acid binding;GO:0004534//5'-3' exoribonuclease activity	GO:0005634//nucleus
CL7608.Contig1_DB	3	26.78	34.9	20.52	27.4	8.77	8.32	12.48	9.85667	3.04	11.24	5.34	6.54	Vegetative cell wall protein gp1 OS=Chlamydomonas reinhardtii GN=GP1 PE=2 SV=1	-	-	-
CL8529.Contig2_DB	3	32.07	38.37	33.05	34.4967	12.89	21.53	30.25	21.5567	17.38	10.89	13.99	14.0867	Ubiquitin-like-specific protease ESD4 OS=Arabidopsis thaliana GN=ESD4 PE=1 SV=1	GO:0010413//glucuronoxylan metabolic process;GO:0016926//protein desumoylation;GO:0009911//positive regulation of flower development;GO:0006508//proteolysis;GO:0010074//maintenance of meristem identity;GO:0045492//xylan biosynthetic process;GO:0006406//mRNA export from nucleus	GO:0016929//SUMO-specific protease activity	GO:0005634//nucleus
CL14314.Contig2_DB	3	13.13	6.14	10.81	10.0267	3.12	4.65	8.52	5.43	1.21	2.61	0.5	1.44	Leucine-rich repeat extensin-like protein 6 OS=Arabidopsis thaliana GN=LRX6 PE=2 SV=1	-	-	GO:0005739//mitochondrion
CL21210.Contig2_DB	3	13.6	13.18	8.53	11.77	3.98	2.27	8.82	5.02333	2.82	3.69	4.88	3.79667	Proline-rich receptor-like protein kinase PERK8 OS=Arabidopsis thaliana GN=PERK8 PE=1 SV=1	-	-	-
CL15992.Contig2_DB	3	15.51	5.61	14.63	11.9167	5.13	7.99	8	7.04	3.58	4.42	1.74	3.24667	Probable splicing factor 3A subunit 1 OS=Arabidopsis thaliana GN=At1g14650 PE=1 SV=2	GO:0006396//RNA processing	GO:0003723//RNA binding	-
CL20975.Contig2_DB	3	115.76	99.89	112.35	109.333	45.55	54.59	77.89	59.3433	34.41	34.31	39.99	36.2367	Two-component response regulator ARR2 OS=Arabidopsis thaliana GN=ARR2 PE=1 SV=1	GO:0000160//two-component signal transduction system (phosphorelay);GO:0035556//intracellular signal transduction;GO:0006355//regulation of transcription, DNA-dependent	GO:0000156//phosphorelay response regulator activity;GO:0003677//DNA binding;GO:0003682//chromatin binding	-
Unigene37127_DB	3	10.79	13.03	10.4	11.4067	2.98	7.91	5.91	5.6	2.64	5.04	2.7	3.46	Mitochondrial adenine nucleotide transporter ADNT1 OS=Arabidopsis thaliana GN=ADNT1 PE=2 SV=1	GO:0030974//thiamine pyrophosphate transport;GO:0055085//transmembrane transport;GO:0006839//mitochondrial transport	GO:0090422//thiamine pyrophosphate transporter activity	GO:0005743//mitochondrial inner membrane;GO:0016021//integral to membrane
CL890.Contig3_DB	3	14.14	9.27	8.79	10.7333	1.56	3.31	7.98	4.28333	0.93	4.41	1.04	2.12667	Pentatricopeptide repeat-containing protein At1g73400, mitochondrial OS=Arabidopsis thaliana GN=At1g73400 PE=2 SV=2	-	-	GO:0005739//mitochondrion
Unigene4931_DB	3	63.81	54.45	53.17	57.1433	35.24	42.19	44.09	40.5067	22.17	28.25	18.29	22.9033	Vegetative cell wall protein gp1 OS=Chlamydomonas reinhardtii GN=GP1 PE=2 SV=1	GO:0006468//protein phosphorylation	GO:0005524//ATP binding;GO:0004674//protein serine/threonine kinase activity	-
CL10655.Contig1_DB	3	47.6	46.49	35.82	43.3033	15.75	25.39	30.26	23.8	12.92	17.27	7.95	12.7133	--	-	-	GO:0005739//mitochondrion
CL11178.Contig2_DB	3	18.36	20.05	35.81	24.74	12.09	17.7	10.17	13.32	8.06	5.73	7.99	7.26	Cytochrome P450 94A2 OS=Vicia sativa GN=CYP94A2 PE=2 SV=1	GO:0022900//electron transport chain	GO:0009055//electron carrier activity;GO:0005506//iron ion binding;GO:0020037//heme binding;GO:0018685//alkane 1-monooxygenase activity	GO:0016023//cytoplasmic membrane-bounded vesicle
CL8774.Contig6_DB	3	10.97	13.1	12.21	12.0933	4.94	5.84	7.56	6.11333	4.28	4.11	4.19	4.19333	E3 ubiquitin-protein ligase ATL59 OS=Arabidopsis thaliana GN=ATL59 PE=1 SV=1	-	GO:0046872//metal ion binding	GO:0016023//cytoplasmic membrane-bounded vesicle
CL7771.Contig3_DB	3	15.74	17.81	15.26	16.27	3.42	5.64	11.26	6.77333	1.09	4.89	1.51	2.49667	--	-	-	-
CL1023.Contig4_DB	3	46.99	24.43	25.02	32.1467	14.61	23.4	29.2	22.4033	9.67	15.18	9.63	11.4933	Alpha,alpha-trehalose-phosphate synthase [UDP-forming] 6 OS=Arabidopsis thaliana GN=TPS6 PE=1 SV=2	GO:0005992//trehalose biosynthetic process	GO:0003825//alpha,alpha-trehalose-phosphate synthase (UDP-forming) activity;GO:0004805//trehalose-phosphatase activity	GO:0005739//mitochondrion
CL29116.Contig2_DB	3	19.49	14.56	13.17	15.74	3.44	8.03	8.28	6.58333	2.61	6.72	5.67	5	Sulfated surface glycoprotein 185 OS=Volvox carteri PE=1 SV=1	-	-	-
CL4545.Contig1_DB	3	48.77	40.59	46.32	45.2267	29.69	27.09	29.08	28.62	12.85	23.94	8.41	15.0667	Protein Mut11 OS=Chlamydomonas reinhardtii GN=Mut11 PE=2 SV=1	-	-	GO:0009536//plastid
CL9802.Contig4_DB	3	25.84	1.1	21.48	16.14	6.77	18.71	6.95	10.81	4.91	1.44	1.09	2.48	Light-inducible protein CPRF2 OS=Petroselinum crispum GN=CPRF2 PE=2 SV=2	GO:0006355//regulation of transcription, DNA-dependent	GO:0003700//sequence-specific DNA binding transcription factor activity;GO:0043565//sequence-specific DNA binding	-
CL13787.Contig2_DB	3	12.32	12.4	13.74	12.82	6.42	5.52	10.57	7.50333	1.77	5.09	4.84	3.9	Ultraviolet-B receptor UVR8 OS=Arabidopsis thaliana GN=UVR8 PE=1 SV=1	GO:0008380//RNA splicing;GO:0032981//mitochondrial respiratory chain complex I assembly	GO:0008536//Ran GTPase binding	GO:0005739//mitochondrion
CL23891.Contig1_DB	3	35.29	25.85	23.48	28.2067	9.79	17.74	20.14	15.89	6.25	11.68	7.39	8.44	Chaperone protein dnaJ 72 OS=Arabidopsis thaliana GN=ATJ72 PE=2 SV=1	-	-	-
CL10273.Contig1_DB	3	38.77	36.68	39.34	38.2633	18.67	20.55	20.3	19.84	13.15	17.42	14.17	14.9133	Zinc finger CCCH domain-containing protein 50 OS=Oryza sativa subsp. japonica GN=Os07g0568300 PE=2 SV=1	-	GO:0008270//zinc ion binding;GO:0003676//nucleic acid binding	-
CL6433.Contig8_DB	3	93.12	0	139.55	77.5567	28.6	57	32.07	39.2233	3.44	9.29	7.78	6.83667	--	-	-	-
CL5595.Contig1_DB	3	10.93	15.26	15.01	13.7333	7.63	5.78	10.88	8.09667	4.09	6.44	3.54	4.69	Vegetative cell wall protein gp1 OS=Chlamydomonas reinhardtii GN=GP1 PE=2 SV=1	-	-	-
CL22633.Contig2_DB	3	31.64	23.67	17.21	24.1733	10.09	13.6	18.87	14.1867	6.73	7.12	6.8	6.88333	--	-	-	GO:0005737//cytoplasm
CL18400.Contig1_DB	3	19.48	14.36	19.16	17.6667	8.31	13.2	15.63	12.38	9.39	7.01	5	7.13333	Histone deacetylase 15 OS=Arabidopsis thaliana GN=HDA15 PE=2 SV=2	GO:0009294//DNA mediated transformation;GO:0048573//photoperiodism, flowering;GO:0016575//histone deacetylation	GO:0004407//histone deacetylase activity;GO:0008270//zinc ion binding	GO:0009536//plastid;GO:0005634//nucleus
CL12738.Contig1_DB	3	27.84	19.71	22.48	23.3433	10.13	15.56	23.09	16.26	8.93	12.07	5	8.66667	--	-	-	-
CL6414.Contig1_DB	3	466.73	370.25	372.27	403.083	185.61	288.55	392.32	288.827	137.92	221.6	116.01	158.51	--	-	-	GO:0005739//mitochondrion;GO:0009536//plastid
CL20653.Contig2_DB	3	13.25	13.07	9.63	11.9833	8.42	0	12.46	6.96	2.04	1.54	4.5	2.69333	Heat shock 70 kDa protein 17 OS=Arabidopsis thaliana GN=HSP70-17 PE=2 SV=1	-	GO:0005524//ATP binding	GO:0016023//cytoplasmic membrane-bounded vesicle;GO:0005886//plasma membrane;GO:0009507//chloroplast
CL3638.Contig2_DB	3	10.83	9.32	24.63	14.9267	5.81	7.2	9.09	7.36667	3.85	0	3.11	2.32	Protein FLUORESCENT IN BLUE LIGHT, chloroplastic OS=Arabidopsis thaliana GN=FLU PE=1 SV=1	GO:0016117//carotenoid biosynthetic process;GO:0006655//phosphatidylglycerol biosynthetic process;GO:0006636//unsaturated fatty acid biosynthetic process;GO:0019288//isopentenyl diphosphate biosynthetic process, mevalonate-independent pathway;GO:0006766//vitamin metabolic process;GO:0006546//glycine catabolic process;GO:0019748//secondary metabolic process;GO:0009106//lipoate metabolic process;GO…	GO:0005515//protein binding	GO:0009941//chloroplast envelope;GO:0009535//chloroplast thylakoid membrane;GO:0005886//plasma membrane;GO:0005739//mitochondrion
CL787.Contig1_DB	3	765.37	298.64	323.85	462.62	190.48	259.65	370.38	273.503	128.13	188.38	71.6	129.37	Heat shock cognate 70 kDa protein 2 OS=Solanum lycopersicum GN=HSC-2 PE=2 SV=1	GO:0006950//response to stress;GO:0055114//oxidation-reduction process	GO:0032440//2-alkenal reductase [NAD(P)] activity;GO:0005524//ATP binding	-
CL11412.Contig3_DB	3	71.04	60.23	30.39	53.8867	16.82	24.55	37.36	26.2433	6.56	13.57	3.46	7.86333	--	GO:0006457//protein folding;GO:0009644//response to high light intensity;GO:0042542//response to hydrogen peroxide;GO:0009408//response to heat;GO:0009651//response to salt stress	GO:0030544//Hsp70 protein binding	GO:0005737//cytoplasm;GO:0005634//nucleus
CL23490.Contig1_DB	3	44.82	0.08	64.41	36.4367	9.34	29.02	21.16	19.84	3.6	3.64	8.55	5.26333	--	-	-	-
CL4304.Contig2_DB	3	27.03	22.81	16.01	21.95	0	13.03	19.3	10.7767	1.77	5.3	6.88	4.65	--	GO:0016926//protein desumoylation;GO:0050665//hydrogen peroxide biosynthetic process;GO:0010228//vegetative to reproductive phase transition of meristem	-	GO:0005886//plasma membrane;GO:0044424//intracellular part
CL4301.Contig2_DB	3	108.29	137.5	98.52	114.77	44.69	62.91	85	64.2	39.88	51.26	38	43.0467	E3 ubiquitin-protein ligase RGLG1 OS=Arabidopsis thaliana GN=RGLG1 PE=1 SV=1	GO:0042742//defense response to bacterium;GO:0009611//response to wounding;GO:0009867//jasmonic acid mediated signaling pathway;GO:0009690//cytokinin metabolic process	GO:0004842//ubiquitin-protein ligase activity;GO:0008270//zinc ion binding	GO:0005886//plasma membrane
CL18838.Contig2_DB	3	27.83	22.59	25.14	25.1867	8.99	13.19	18.15	13.4433	8.72	11.82	6.44	8.99333	--	-	GO:0003676//nucleic acid binding;GO:0000166//nucleotide binding	-
CL12678.Contig2_DB	3	65.66	67.92	50.13	61.2367	27.1	35.89	42.98	35.3233	24.91	27.24	21.59	24.58	Chaperone protein dnaJ 49 OS=Arabidopsis thaliana GN=ATJ49 PE=2 SV=2	GO:0010048//vernalization response;GO:0007346//regulation of mitotic cell cycle	-	GO:0009536//plastid
CL6071.Contig1_DB	3	19.96	18.79	10.74	16.4967	4.78	8.64	11.62	8.34667	3.05	6.18	5.77	5	Disease resistance protein RPP13 OS=Arabidopsis thaliana GN=RPP13 PE=2 SV=2	-	-	-
CL460.Contig2_DB	3	47.02	58.24	66.73	57.33	17.33	35.54	33.98	28.95	30.3	24.41	18.15	24.2867	--	GO:0006508//proteolysis	GO:0008237//metallopeptidase activity;GO:0008270//zinc ion binding;GO:0004177//aminopeptidase activity	GO:0005886//plasma membrane
CL21217.Contig2_DB	3	29.1	26.36	15.43	23.63	5.41	13.73	21.08	13.4067	5.85	10.31	9.83	8.66333	Proline-rich receptor-like protein kinase PERK9 OS=Arabidopsis thaliana GN=PERK9 PE=2 SV=1	-	-	-
CL18227.Contig2_DB	3	16.58	13.45	14.7	14.91	8.21	2.53	15.68	8.80667	4.9	5.41	2.18	4.16333	Valine--tRNA ligase OS=Arabidopsis thaliana GN=VALRS PE=1 SV=2	GO:0010498//proteasomal protein catabolic process;GO:0006428//isoleucyl-tRNA aminoacylation;GO:0009651//response to salt stress;GO:0007010//cytoskeleton organization;GO:0006450//regulation of translational fidelity;GO:0006096//glycolysis;GO:0006094//gluconeogenesis;GO:0046686//response to cadmium ion	GO:0004822//isoleucine-tRNA ligase activity;GO:0002161//aminoacyl-tRNA editing activity;GO:0005524//ATP binding	GO:0005829//cytosol
CL9062.Contig2_DB	3	28.93	20.44	27.61	25.66	16.52	11.5	23.27	17.0967	9.98	9.86	6.38	8.74	Vegetative cell wall protein gp1 OS=Chlamydomonas reinhardtii GN=GP1 PE=2 SV=1	GO:0008284//positive regulation of cell proliferation;GO:0009560//embryo sac egg cell differentiation	-	GO:0005634//nucleus
Unigene33000_DB	3	87.72	116.98	82.24	95.6467	44.41	54.47	76.71	58.53	42.85	45.24	30.84	39.6433	RNA pseudourine synthase 5 OS=Oryza sativa subsp. japonica GN=Os03g0288500 PE=2 SV=2	-	-	-
CL6349.Contig1_DB	3	24.13	14.15	23.77	20.6833	10.25	13.86	20.89	15	3.9	8.01	4.92	5.61	DNA-directed RNA polymerase II subunit RPB1 OS=Arabidopsis thaliana GN=RPB205 PE=1 SV=3	-	GO:0005488//binding	-
CL2872.Contig1_DB	3	34.5	23.4	34.67	30.8567	17.97	14.83	25.48	19.4267	12.9	16.37	9.57	12.9467	Proline-rich receptor-like protein kinase PERK2 OS=Arabidopsis thaliana GN=PERK2 PE=2 SV=3	-	GO:0000166//nucleotide binding	GO:0044424//intracellular part
CL14168.Contig1_DB	3	41.34	55.53	35.87	44.2467	15.44	20.45	33.58	23.1567	15.41	19.73	14.79	16.6433	Tryptophan synthase alpha chain OS=Arabidopsis thaliana GN=TRPA1 PE=1 SV=2	GO:0042742//defense response to bacterium;GO:0052544//defense response by callose deposition in cell wall;GO:0000162//tryptophan biosynthetic process	GO:0004834//tryptophan synthase activity	GO:0009570//chloroplast stroma
CL17001.Contig2_DB	3	68.04	53.77	56.48	59.43	37.76	45.44	43.43	42.21	19.78	26.9	27.55	24.7433	SURP and G-patch domain-containing protein 1-like protein OS=Arabidopsis thaliana GN=At3g52120 PE=2 SV=1	-	GO:0003676//nucleic acid binding	GO:0005634//nucleus
CL1485.Contig4_DB	3	352.86	264.4	334.18	317.147	109.06	113.45	187.82	136.777	67.12	71.53	63.63	67.4267	Fructan 6-exohydrolase OS=Triticum aestivum GN=6-FEH PE=1 SV=1	GO:0005975//carbohydrate metabolic process;GO:0050896//response to stimulus	GO:0004564//beta-fructofuranosidase activity	GO:0016023//cytoplasmic membrane-bounded vesicle;GO:0005576//extracellular region
CL22008.Contig2_DB	3	11.87	9.98	11.97	11.2733	6.02	3.96	9	6.32667	6.27	2.39	2.1	3.58667	--	GO:0006810//transport	GO:0005515//protein binding	GO:0005643//nuclear pore
CL2880.Contig2_DB	3	28.47	23.6	22.33	24.8	10.43	16.63	14.95	14.0033	4.3	13.5	3.7	7.16667	Peroxisome biogenesis protein 16 OS=Arabidopsis thaliana GN=PEX16 PE=1 SV=1	GO:0006633//fatty acid biosynthetic process;GO:0007031//peroxisome organization	-	GO:0005789//endoplasmic reticulum membrane;GO:0005777//peroxisome
CL3656.Contig2_DB	3	41.82	56.13	37.71	45.22	9.72	18.25	31.58	19.85	14.46	20.45	14.52	16.4767	Formin-like protein 20 OS=Arabidopsis thaliana GN=FH20 PE=2 SV=3	-	-	-
CL2376.Contig8_DB	3	17.48	17.3	14.71	16.4967	7.38	9.18	6.62	7.72667	4.31	0	2.96	2.42333	--	-	-	-
CL1532.Contig2_DB	3	16.91	15.98	14.1	15.6633	6.35	9.27	10.01	8.54333	7.52	6.47	3.34	5.77667	Peptide methionine sulfoxide reductase B1, chloroplastic OS=Oryza sativa subsp. japonica GN=MSRB1 PE=2 SV=2	GO:0006979//response to oxidative stress;GO:0055114//oxidation-reduction process	GO:0033743//peptide-methionine (R)-S-oxide reductase activity	GO:0009570//chloroplast stroma
CL7106.Contig2_DB	3	63.48	69.87	49.83	61.06	18.23	33.24	23.24	24.9033	12.01	13.35	26.9	17.42	NAC domain-containing protein 71 OS=Oryza sativa subsp. japonica GN=NAC71 PE=2 SV=1	-	-	-
CL24718.Contig1_DB	3	30.14	25.16	32.31	29.2033	11.22	11.47	22.63	15.1067	6.95	11.86	3.98	7.59667	--	-	-	GO:0005739//mitochondrion
CL9365.Contig1_DB	3	17.69	18.93	18.42	18.3467	6.17	11.63	13.84	10.5467	5.3	8.01	6.02	6.44333	Mitochondrial phosphate carrier protein 3, mitochondrial OS=Arabidopsis thaliana GN=MPT3 PE=1 SV=1	GO:0006810//transport	-	GO:0016021//integral to membrane;GO:0005618//cell wall;GO:0005739//mitochondrion;GO:0009507//chloroplast;GO:0005886//plasma membrane
CL16158.Contig2_DB	3	22.15	16.93	15.46	18.18	6.49	10.84	6.5	7.94333	3.8	3.97	5.54	4.43667	Proline-rich receptor-like protein kinase PERK2 OS=Arabidopsis thaliana GN=PERK2 PE=2 SV=3	-	GO:1901363;GO:0097159//organic cyclic compound binding;GO:0003824//catalytic activity	GO:0005634//nucleus
CL22988.Contig4_DB	3	404.57	522.64	354.97	427.393	165.6	252.17	283.3	233.69	190.98	199.12	127.36	172.487	--	-	-	-
Unigene310_DB	3	12.39	13.22	23.76	16.4567	6.09	10.45	14.39	10.31	2.72	8.11	6.18	5.67	Formin-like protein 5 OS=Oryza sativa subsp. japonica GN=FH5 PE=2 SV=2	-	-	-
CL24582.Contig2_DB	3	47.49	49.71	44.02	47.0733	18.31	27.01	38.66	27.9933	18.97	21.07	18.07	19.37	--	-	-	-
CL8396.Contig1_DB	3	53.27	49.13	49.72	50.7067	24.12	28.28	41.36	31.2533	17.5	19.25	22.74	19.83	CDPK-related kinase 3 OS=Arabidopsis thaliana GN=CRK3 PE=1 SV=1	GO:0006468//protein phosphorylation	GO:0004683//calmodulin-dependent protein kinase activity;GO:0005509//calcium ion binding;GO:0005524//ATP binding	GO:0005886//plasma membrane
CL7516.Contig2_DB	3	9.7	15.96	12.62	12.76	4.67	10.19	3.67	6.17667	3.02	5.37	5.78	4.72333	U1 small nuclear ribonucleoprotein C-1 OS=Sorghum bicolor GN=Sb04g009880 PE=3 SV=1	-	GO:0046872//metal ion binding	GO:0044424//intracellular part
CL18015.Contig1_DB	3	30.48	18.81	28.09	25.7933	12.01	17.36	20.76	16.71	10.28	10.59	7.99	9.62	--	-	GO:0005515//protein binding	GO:0005635//nuclear envelope;GO:0005783//endoplasmic reticulum
CL529.Contig1_DB	3	54.41	49.37	55.74	53.1733	28.19	33.66	44.17	35.34	23.64	21.87	21.34	22.2833	Serine/threonine-protein phosphatase BSL2 homolog OS=Oryza sativa subsp. japonica GN=BSL2 PE=2 SV=2	-	GO:0004722//protein serine/threonine phosphatase activity;GO:0005506//iron ion binding;GO:0030145//manganese ion binding	GO:0005829//cytosol;GO:0005634//nucleus;GO:0005886//plasma membrane
CL1822.Contig2_DB	3	9.05	12.24	14.97	12.0867	7.65	6.14	5.66	6.48333	2.7	4.15	1.53	2.79333	--	-	-	-
CL10581.Contig3_DB	3	407.89	256.4	329.49	331.26	183.99	178.23	239.14	200.453	110.67	151.79	117.33	126.597	Protein FRIGIDA OS=Arabidopsis thaliana GN=FRI PE=2 SV=1	-	-	-
CL19854.Contig1_DB	3	34.09	37.38	29.99	33.82	13.98	23.04	28.93	21.9833	10.1	20.74	11.23	14.0233	Zinc finger CCCH domain-containing protein 55 OS=Oryza sativa subsp. japonica GN=Os08g0135800 PE=2 SV=1	-	GO:0003677//DNA binding;GO:0008270//zinc ion binding	-
CL26126.Contig1_DB	3	33	2.83	23.9	19.91	7.15	21.93	12.74	13.94	3.74	7.56	0.13	3.81	Serine/arginine-rich splicing factor RS2Z32 OS=Arabidopsis thaliana GN=RS2Z32 PE=1 SV=1	-	GO:0003676//nucleic acid binding;GO:0008270//zinc ion binding;GO:0000166//nucleotide binding	GO:0016607//nuclear speck;GO:0005739//mitochondrion
CL14898.Contig1_DB	3	19.73	15.67	16.77	17.39	6.26	10.69	17.13	11.36	6.69	7.69	5.95	6.77667	Early nodulin-75 OS=Glycine max GN=ENOD2A PE=2 SV=2	-	GO:0008270//zinc ion binding;GO:0008080//N-acetyltransferase activity	-
CL6229.Contig3_DB	3	11.53	14.19	16.02	13.9133	4.23	10.64	10.58	8.48333	2.69	5.73	6.34	4.92	Mitogen-activated protein kinase kinase kinase 2 OS=Arabidopsis thaliana GN=ANP2 PE=2 SV=1	GO:0006468//protein phosphorylation	GO:0004672//protein kinase activity;GO:0005524//ATP binding	GO:0016023//cytoplasmic membrane-bounded vesicle;GO:0005886//plasma membrane
CL26052.Contig1_DB	3	20.38	13.82	17.26	17.1533	6.55	7.15	11.53	8.41	1.87	5.9	3.7	3.82333	MACPF domain-containing protein At4g24290 OS=Arabidopsis thaliana GN=At4g24290 PE=2 SV=1	-	-	GO:0005886//plasma membrane
CL3860.Contig1_DB	3	27.61	27.36	19.64	24.87	14.35	14.79	18.56	15.9	9.85	11.85	8.77	10.1567	mRNA cap guanine-N7 methyltransferase 1 OS=Oryza sativa subsp. japonica GN=Os08g0180000 PE=2 SV=1	GO:0006370//7-methylguanosine mRNA capping;GO:0036265//RNA (guanine-N7)-methylation;GO:0015824//proline transport	GO:0004482//mRNA (guanine-N7-)-methyltransferase activity;GO:0003723//RNA binding	GO:0005634//nucleus
CL121.Contig2_DB	3	80.49	91.95	93.83	88.7567	24.89	23.22	31.25	26.4533	35.42	31.37	26.37	31.0533	Transcription factor PIF5 OS=Arabidopsis thaliana GN=PIF5 PE=1 SV=1	-	GO:0046983//protein dimerization activity	GO:0043231//intracellular membrane-bounded organelle
CL16598.Contig1_DB	3	9.73	14.54	6.26	10.1767	0	2.24	2.05	1.43	0.78	1.27	4.69	2.24667	G-type lectin S-receptor-like serine/threonine-protein kinase At1g34300 OS=Arabidopsis thaliana GN=At1g34300 PE=1 SV=1	GO:0006468//protein phosphorylation	GO:0005524//ATP binding;GO:0004674//protein serine/threonine kinase activity	GO:0016023//cytoplasmic membrane-bounded vesicle;GO:0016020//membrane;GO:0005739//mitochondrion
CL6762.Contig2_DB	3	9.3	17.35	10.13	12.26	3.03	2.43	2.98	2.81333	1.8	5.24	2.19	3.07667	Zinc finger CCCH domain-containing protein 16 OS=Oryza sativa subsp. japonica GN=Os02g0557500 PE=2 SV=2	-	GO:0003723//RNA binding;GO:0008270//zinc ion binding	GO:0005634//nucleus
CL17076.Contig1_DB	3	10.51	22.23	12.17	14.97	1.54	0	1.63	1.05667	1.94	4.09	1.07	2.36667	--	-	-	-
CL76.Contig1_DB	3	21.54	13.27	8.33	14.38	1.78	1.41	1.19	1.46	1.68	3.48	3.09	2.75	Casein kinase II subunit beta OS=Arabidopsis thaliana GN=CKB1 PE=1 SV=1	GO:0042753//positive regulation of circadian rhythm;GO:0045859//regulation of protein kinase activity;GO:0048573//photoperiodism, flowering	GO:0004674//protein serine/threonine kinase activity;GO:0008134//transcription factor binding;GO:0019887//protein kinase regulator activity	GO:0005956//protein kinase CK2 complex;GO:0005737//cytoplasm;GO:0005634//nucleus
CL3310.Contig3_DB	3	12.6	19.77	8.1	13.49	2.13	3.35	3.11	2.86333	3.55	3.54	2.96	3.35	Vegetative cell wall protein gp1 OS=Chlamydomonas reinhardtii GN=GP1 PE=2 SV=1	-	-	-
CL4241.Contig3_DB	3	9.75	17.9	10.3	12.65	1.42	2.85	1.86	2.04333	2.24	3.52	2.94	2.9	--	-	-	-
CL3965.Contig2_DB	3	34.86	84.63	45.71	55.0667	7.1	12.69	7.21	9	8.55	5.75	14.69	9.66333	--	-	-	-
CL20513.Contig1_DB	3	60.38	108.34	58.21	75.6433	15.43	14.08	17.72	15.7433	19.76	22.62	19.11	20.4967	Formin-like protein 8 OS=Oryza sativa subsp. japonica GN=FH8 PE=2 SV=1	-	-	-
Unigene2268_DB	3	245.77	363.6	187.93	265.767	56.36	72.07	130.29	86.24	104.11	106.3	97.65	102.687	Formin-like protein 6 OS=Oryza sativa subsp. japonica GN=FH6 PE=2 SV=2	-	-	-
CL28085.Contig1_DB	3	7.04	14.56	10.49	10.6967	0.41	0.47	1.28	0.72	1.03	2.42	0.42	1.29	--	-	-	-
CL7143.Contig4_DB	3	38.17	69.38	41.25	49.6	4.24	3.45	2.97	3.55333	9.79	11.27	2.5	7.85333	Formin-like protein 5 OS=Oryza sativa subsp. japonica GN=FH5 PE=2 SV=2	-	-	-
CL19045.Contig1_DB	3	23.18	35.82	21.62	26.8733	6	5.99	6.99	6.32667	6.98	7.8	6.07	6.95	Probable AMP deaminase OS=Oryza sativa subsp. japonica GN=AMPD PE=2 SV=1	GO:0009880//embryonic pattern specification;GO:0050826//response to freezing;GO:0048825//cotyledon development;GO:0051301//cell division;GO:0009640//photomorphogenesis;GO:0010564//regulation of cell cycle process;GO:0019915//lipid storage;GO:0032264//IMP salvage;GO:0010182//sugar mediated signaling pathway;GO:0016567//protein ubiquitination;GO:0009845//seed germination;GO:0010228//vegetative to r…	GO:0043424//protein histidine kinase binding;GO:0003876//AMP deaminase activity;GO:0046872//metal ion binding	GO:0005829//cytosol;GO:0005634//nucleus;GO:0031307//integral to mitochondrial outer membrane
CL3739.Contig4_DB	3	34.14	57.59	35.01	42.2467	0	23.4	23.84	15.7467	20.34	13.49	4.4	12.7433	Auxin-responsive protein IAA17 OS=Oryza sativa subsp. japonica GN=IAA17 PE=2 SV=1	GO:0006417//regulation of translation;GO:0006355//regulation of transcription, DNA-dependent;GO:0009734//auxin mediated signaling pathway	GO:0046983//protein dimerization activity	GO:0005634//nucleus
CL4291.Contig1_DB	3	112.83	83.88	52.4	83.0367	21.37	15.85	17.05	18.09	21.72	31.38	17.21	23.4367	Probable WRKY transcription factor 65 OS=Arabidopsis thaliana GN=WRKY65 PE=2 SV=1	GO:0006355//regulation of transcription, DNA-dependent;GO:0006811//ion transport	GO:0043565//sequence-specific DNA binding;GO:0003700//sequence-specific DNA binding transcription factor activity	-
CL25277.Contig2_DB	3	19.94	25.56	15.55	20.35	4.15	6.02	9.37	6.51333	8.87	6.72	5.5	7.03	COP9 signalosome complex subunit 1 OS=Arabidopsis thaliana GN=CSN1 PE=1 SV=2	GO:0009880//embryonic pattern specification;GO:0050826//response to freezing;GO:0007131//reciprocal meiotic recombination;GO:0016579//protein deubiquitination;GO:0006461//protein complex assembly;GO:0010638//positive regulation of organelle organization;GO:0033044//regulation of chromosome organization;GO:0016571//histone methylation;GO:0009651//response to salt stress;GO:0048825//cotyledon devel…	GO:0005515//protein binding	GO:0005829//cytosol;GO:0008180//signalosome
CL25175.Contig1_DB	3	63.41	134.07	58.71	85.3967	13.95	10.2	24.04	16.0633	13.87	36.14	19.32	23.11	--	-	-	-
CL18190.Contig1_DB	3	43.15	100.05	50.82	64.6733	16.18	13.43	17.06	15.5567	17.59	24.14	12.61	18.1133	--	-	-	-
Unigene43052_DB	3	17.88	40.23	25.88	27.9967	2.18	7.55	5.77	5.16667	6.89	4.35	7.38	6.20667	Proline-rich receptor-like protein kinase PERK10 OS=Arabidopsis thaliana GN=PERK10 PE=1 SV=2	-	-	-
CL8956.Contig3_DB	3	7.07	14.6	9.32	10.33	2.61	0	2.47	1.69333	1.78	3.17	0	1.65	--	-	-	-
CL2883.Contig1_DB	3	42.34	68.52	29.31	46.7233	9.89	15.8	23.77	16.4867	19.96	15.37	11.28	15.5367	Proline-rich receptor-like protein kinase PERK14 OS=Arabidopsis thaliana GN=PERK14 PE=2 SV=1	-	-	-
CL12686.Contig1_DB	3	130.48	191.97	100.15	140.867	11.45	17.2	26.12	18.2567	24.62	32.57	19.11	25.4333	F-box protein PP2-A13 OS=Arabidopsis thaliana GN=PP2A13 PE=1 SV=1	-	-	-
CL2460.Contig4_DB	3	658.83	1226.77	920.76	935.453	336.44	331.49	320.62	329.517	304.43	301.82	427.26	344.503	Vegetative cell wall protein gp1 OS=Chlamydomonas reinhardtii GN=GP1 PE=2 SV=1	GO:0009611//response to wounding	-	GO:0005773//vacuole;GO:0009507//chloroplast
Unigene350_DB	3	11.3	17.04	8.04	12.1267	1.24	2.81	3.15	2.4	1.91	2.72	2.25	2.29333	--	-	-	-
CL4354.Contig3_DB	3	13.03	11.49	5.87	10.13	0.83	1.25	4.27	2.11667	2.15	2.22	3.49	2.62	--	GO:0006810//transport	GO:0005471//ATP:ADP antiporter activity;GO:0005524//ATP binding	GO:0005886//plasma membrane;GO:0016021//integral to membrane;GO:0009507//chloroplast
CL9755.Contig2_DB	3	51.01	114.46	45.89	70.4533	13.15	8.64	14.67	12.1533	9.05	12.41	13.62	11.6933	Heavy metal-associated isoprenylated plant protein 26 OS=Arabidopsis thaliana GN=HIPP26 PE=1 SV=1	GO:0019375//galactolipid biosynthetic process;GO:0045892//negative regulation of transcription, DNA-dependent;GO:0030001//metal ion transport;GO:0016036//cellular response to phosphate starvation	GO:0046872//metal ion binding	GO:0005737//cytoplasm;GO:0005634//nucleus
Unigene3663_DB	3	152.76	235.61	144.38	177.583	33.92	30.68	56.29	40.2967	30.78	58.48	38.93	42.73	--	-	GO:0016740//transferase activity	GO:0005739//mitochondrion
CL18972.Contig1_DB	3	173.33	415.85	296.13	295.103	93.36	117	93.99	101.45	102.16	109.29	126.17	112.54	F-box protein At2g26850 OS=Arabidopsis thaliana GN=At2g26850 PE=2 SV=1	-	GO:0005524//ATP binding;GO:0051082//unfolded protein binding	GO:0016023//cytoplasmic membrane-bounded vesicle
Unigene41845_DB	3	35.97	73.28	61.08	56.7767	17.95	21.2	18.42	19.19	13.62	22.45	15.05	17.04	Probable thiol methyltransferase 2 OS=Arabidopsis thaliana GN=HOL3 PE=1 SV=1	GO:0032259//methylation	GO:0008168//methyltransferase activity	GO:0005737//cytoplasm
CL23471.Contig1_DB	3	11.45	17.94	14.98	14.79	2.38	5.16	4.44	3.99333	3.04	4.32	1.66	3.00667	--	-	-	-
CL17912.Contig2_DB	3	11.17	25.36	7.95	14.8267	0.88	4.09	2.9	2.62333	2.61	3.04	2.28	2.64333	MATE efflux family protein ALF5 OS=Arabidopsis thaliana GN=ALF5 PE=2 SV=1	GO:0042221//response to chemical stimulus;GO:0055085//transmembrane transport	GO:0022857//transmembrane transporter activity	GO:0016020//membrane
CL1605.Contig6_DB	3	201.07	216.07	85.41	167.517	20.66	25.94	53.74	33.4467	24.22	84.68	30.9	46.6	--	-	-	-
Unigene31577_DB	3	38.16	53.35	25.95	39.1533	6.85	7.95	13.15	9.31667	4.34	4.12	12.19	6.88333	--	-	-	-
CL24669.Contig1_DB	3	40.02	29.95	9.37	26.4467	4.86	6.46	5.78	5.7	2.26	4.23	3.58	3.35667	Abscisic acid receptor PYL8 OS=Arabidopsis thaliana GN=PYL8 PE=1 SV=1	GO:0006950//response to stress;GO:0009789//positive regulation of abscisic acid mediated signaling pathway	GO:0010427//abscisic acid binding	GO:0005634//nucleus
Unigene31618_DB	3	184.67	163.84	67.97	138.827	28.57	52.16	64.39	48.3733	43.38	67.07	38.38	49.61	--	-	-	-
Unigene2363_DB	3	44.39	59.35	45.46	49.7333	12.19	12.22	23.46	15.9567	8.86	24.57	20.18	17.87	--	-	-	-
Unigene3716_DB	3	34.2	39.35	22.09	31.88	5.77	6.69	18.26	10.24	4.34	12.72	10.34	9.13333	--	-	-	-
CL1253.Contig4_DB	3	27.24	19.08	14.45	20.2567	5.12	5.29	11.61	7.34	5.65	6.89	4.64	5.72667	--	-	-	-
CL5746.Contig3_DB	3	79.95	96.55	64.63	80.3767	20.47	30.81	33.82	28.3667	35.36	36.1	22.65	31.37	SNF1-related protein kinase regulatory subunit beta-3 OS=Arabidopsis thaliana GN=KINB3 PE=1 SV=1	GO:0016310//phosphorylation	GO:0016301//kinase activity	-
CL5562.Contig2_DB	3	470.3	322.66	124.99	305.983	49.37	70.03	70.88	63.4267	35.35	75.18	113.64	74.7233	Crocetin glucosyltransferase 2 OS=Crocus sativus GN=GLT2 PE=1 SV=1	GO:1901701;GO:0042537//benzene-containing compound metabolic process;GO:0071214;GO:0032787//monocarboxylic acid metabolic process;GO:0010035//response to inorganic substance;GO:0033554//cellular response to stress;GO:0006952//defense response	GO:0035251//UDP-glucosyltransferase activity	-
Unigene39377_DB	3	36.72	47.17	19.97	34.62	3.18	5.16	14.23	7.52333	2.42	8.92	10.65	7.33	--	-	-	-
CL8774.Contig8_DB	3	16.34	26.68	19.64	20.8867	4.93	8.5	13.37	8.93333	8.92	9.89	6.91	8.57333	RING-H2 finger protein ATL2 OS=Arabidopsis thaliana GN=ATL2 PE=2 SV=2	-	GO:0046872//metal ion binding	GO:0016023//cytoplasmic membrane-bounded vesicle
CL27934.Contig3_DB	3	17.66	19.88	14.38	17.3067	3.24	7.31	8.76	6.43667	4.18	7.31	7.61	6.36667	--	-	-	-
CL7669.Contig1_DB	3	39.48	61.48	39.05	46.67	7.55	14.87	20.58	14.3333	10.45	24.57	17.34	17.4533	--	-	-	-
CL29473.Contig6_DB	3	8.59	19.8	10.16	12.85	2.18	2.15	4.73	3.02	4.09	4.3	1.79	3.39333	Protein argonaute 3 OS=Arabidopsis thaliana GN=AGO3 PE=3 SV=1	-	-	-
CL17636.Contig1_DB	3	17.88	56.9	19.94	31.5733	5.58	5.57	5.09	5.41333	2.63	2.3	8.4	4.44333	Leucoanthocyanidin dioxygenase OS=Arabidopsis thaliana GN=LDOX PE=1 SV=1	GO:0080167//response to karrikin;GO:0055114//oxidation-reduction process	GO:0005506//iron ion binding;GO:0016702//oxidoreductase activity, acting on single donors with incorporation of molecular oxygen, incorporation of two atoms of oxygen;GO:0016706//oxidoreductase activity, acting on paired donors, with incorporation or reduction of molecular oxygen, 2-oxoglutarate as one donor, and incorporation of one atom each of oxygen into both donors	-
Unigene41821_DB	3	11.57	23.51	13.64	16.24	3.02	2.25	5.42	3.56333	3.68	1.73	2.11	2.50667	--	GO:0007623//circadian rhythm;GO:0010264//myo-inositol hexakisphosphate biosynthetic process	-	GO:0009507//chloroplast
CL8347.Contig2_DB	3	121.06	189.14	89.57	133.257	21.34	25.61	48.99	31.98	42.97	27.56	35.33	35.2867	Basic leucine zipper 9 OS=Arabidopsis thaliana GN=BZIP9 PE=1 SV=1	GO:0006355//regulation of transcription, DNA-dependent	GO:0003677//DNA binding	GO:0005634//nucleus
Unigene26782_DB	3	11.25	17.2	6.51	11.6533	2.19	0.63	4.07	2.29667	1.39	1.09	2.29	1.59	Period clock protein OS=Acetabularia acetabulum PE=4 SV=2	-	-	-
CL11708.Contig1_DB	3	17.28	8.88	4.63	10.2633	1.93	4.66	2.72	3.10333	2.28	2.33	3.44	2.68333	Formin-like protein 14 OS=Arabidopsis thaliana GN=FH14 PE=3 SV=3	-	-	-
CL21376.Contig3_DB	3	53.72	37.83	19.7	37.0833	5.4	6.59	8.59	6.86	8.27	10.8	3.53	7.53333	--	-	-	-
CL860.Contig1_DB	3	11.39	18.29	9.56	13.08	3.51	3.73	4.57	3.93667	3.02	1.71	5.98	3.57	Disease resistance RPP13-like protein 4 OS=Arabidopsis thaliana GN=RPP13L4 PE=2 SV=2	GO:0008654//phospholipid biosynthetic process	GO:0016780//phosphotransferase activity, for other substituted phosphate groups	GO:0016020//membrane;GO:0005739//mitochondrion
CL14612.Contig1_DB	3	133.8	206.43	58.54	132.923	116.67	83.9	58.59	86.3867	22.23	45.53	51.62	39.7933	NAC domain-containing protein 67 OS=Oryza sativa subsp. japonica GN=NAC67 PE=2 SV=1	GO:0009788//negative regulation of abscisic acid mediated signaling pathway;GO:0006355//regulation of transcription, DNA-dependent;GO:0009611//response to wounding	GO:0003677//DNA binding	GO:0005634//nucleus
CL4954.Contig2_DB	3	14.95	26.3	19.18	20.1433	4.2	2.4	6.28	4.29333	2.65	7.63	3.83	4.70333	Formin-like protein 5 OS=Oryza sativa subsp. japonica GN=FH5 PE=2 SV=2	-	-	-
Unigene35943_DB	3	11.88	23.63	14.29	16.6	2.21	2.55	5.85	3.53667	1.39	6.6	3.14	3.71	--	-	-	-
CL12781.Contig4_DB	3	18.34	20.3	9.11	15.9167	5.92	8.43	4.5	6.28333	2.01	5.62	3.56	3.73	--	-	-	-
CL9862.Contig7_DB	3	14.54	17.03	10.75	14.1067	1.79	5.32	8.25	5.12	4.5	5.32	3.33	4.38333	--	-	-	-
CL769.Contig1_DB	3	13.48	27.03	12.82	17.7767	7.29	3.41	5.91	5.53667	4.18	3.94	7.55	5.22333	--	-	-	-
Unigene32328_DB	3	42.3	54.26	19.34	38.6333	5.33	21.25	18.16	14.9133	7.99	13.37	11.64	11	--	-	-	-
CL1472.Contig2_DB	3	39	54.8	38.39	44.0633	15.31	16.89	15.72	15.9733	14.6	13.18	14.28	14.02	--	-	-	-
Unigene39761_DB	3	36.05	70.11	36.73	47.63	11.44	12.21	12.85	12.1667	8.08	11.13	0	6.40333	--	-	-	-
CL249.Contig6_DB	3	20.83	34.68	23.84	26.45	6.08	3.62	11.88	7.19333	7.99	7.12	9.16	8.09	Protein argonaute MEL1 OS=Oryza sativa subsp. japonica GN=MEL1 PE=2 SV=1	-	-	-
CL29266.Contig2_DB	3	36.2	63.6	49.88	49.8933	5.98	14.33	9.72	10.01	4.53	13.67	4.16	7.45333	--	-	-	-
Unigene25924_DB	3	65.48	141.06	67.02	91.1867	18.52	14	30.63	21.05	25.2	24.26	18.85	22.77	Vegetative cell wall protein gp1 OS=Chlamydomonas reinhardtii GN=GP1 PE=2 SV=1	-	-	-
Unigene39578_DB	3	40.38	64.76	34.13	46.4233	5.09	18.64	17.39	13.7067	14.44	17.93	10.2	14.19	--	-	-	-
CL7837.Contig1_DB	3	84.62	222.8	135.04	147.487	51.44	45.26	73.13	56.61	42.26	54.96	67.44	54.8867	Metal tolerance protein 5 OS=Oryza sativa subsp. japonica GN=MTP5 PE=2 SV=1	GO:0030026//cellular manganese ion homeostasis;GO:0046688//response to copper ion;GO:0071421//manganese ion transmembrane transport;GO:0010042//response to manganese ion	GO:0010486//manganese:hydrogen antiporter activity	GO:0016021//integral to membrane;GO:0005774//vacuolar membrane;GO:0005770//late endosome;GO:0005794//Golgi apparatus
CL28968.Contig5_DB	3	16.35	17.28	13.17	15.6	3.8	6.44	7.59	5.94333	5.11	5.94	7.64	6.23	Formin-like protein 5 OS=Oryza sativa subsp. japonica GN=FH5 PE=2 SV=2	-	-	-
Unigene36917_DB	3	13.08	12.89	4.62	10.1967	7.42	7.64	7.74	7.6	2.11	3.31	4.45	3.29	ABC transporter E family member 2 OS=Arabidopsis thaliana GN=ABCE2 PE=2 SV=1	GO:0006200//ATP catabolic process	GO:0051536//iron-sulfur cluster binding;GO:0009055//electron carrier activity;GO:0005524//ATP binding;GO:0016887//ATPase activity	GO:0009536//plastid
CL2380.Contig2_DB	3	28.96	31.86	13.47	24.7633	3.89	6.82	13.79	8.16667	7.5	9.4	6.32	7.74	--	-	-	-
CL1403.Contig3_DB	3	11.41	15.56	9.22	12.0633	2.41	2.57	3.98	2.98667	2.37	2.13	4.31	2.93667	Probable beta-1,3-galactosyltransferase 20 OS=Arabidopsis thaliana GN=B3GALT20 PE=2 SV=1	GO:0006486//protein glycosylation	GO:0030246//carbohydrate binding;GO:0008378//galactosyltransferase activity	GO:0005794//Golgi apparatus;GO:0016021//integral to membrane
CL26173.Contig2_DB	3	8.08	16.07	8.37	10.84	1.26	4.85	3.82	3.31	2.09	3.16	1.18	2.14333	Formin-like protein 14 OS=Arabidopsis thaliana GN=FH14 PE=3 SV=3	-	-	-
CL7802.Contig2_DB	3	73.26	88.38	42.2	67.9467	4.29	17.45	20.89	14.21	9.61	20.43	6.57	12.2033	F-box protein PP2-A13 OS=Arabidopsis thaliana GN=PP2A13 PE=1 SV=1	GO:0009611//response to wounding	-	-
CL4632.Contig1_DB	3	22.19	25.29	15.17	20.8833	4.32	6.4	9.75	6.82333	5.43	7.11	7.02	6.52	--	-	-	-
CL2433.Contig4_DB	3	5.69	20.37	17.15	14.4033	0	2.9	2.35	1.75	0	3.28	1.92	1.73333	--	-	-	-
CL12992.Contig3_DB	3	20.11	34.13	19.44	24.56	6.9	9.43	25.91	14.08	2.26	7.08	7.71	5.68333	Leucine-rich repeat extensin-like protein 3 OS=Arabidopsis thaliana GN=LRX3 PE=1 SV=1	-	-	-
CL8206.Contig3_DB	3	25.58	30.44	10.65	22.2233	8.22	15.31	14.78	12.77	2.07	3.44	9.09	4.86667	E3 ubiquitin-protein ligase SPL11 OS=Oryza sativa subsp. japonica GN=SPL11 PE=1 SV=2	GO:0031348//negative regulation of defense response;GO:0009908//flower development;GO:0048586//regulation of long-day photoperiodism, flowering;GO:0016567//protein ubiquitination;GO:0043069//negative regulation of programmed cell death	GO:0004842//ubiquitin-protein ligase activity;GO:0005515//protein binding	GO:0005829//cytosol;GO:0000151//ubiquitin ligase complex;GO:0005634//nucleus
CL5070.Contig2_DB	3	60.4	86.58	48.04	65.0067	19.21	18.23	26.24	21.2267	14.74	17.06	22.6	18.1333	Proline-rich receptor-like protein kinase PERK5 OS=Arabidopsis thaliana GN=PERK5 PE=2 SV=1	-	-	GO:0016020//membrane;GO:0005739//mitochondrion;GO:0009507//chloroplast
Unigene42870_DB	3	24.26	38.36	11.7	24.7733	10.57	7.16	13.05	10.26	6.44	9.71	10.46	8.87	Acyltransferase-like protein At3g26840, chloroplastic OS=Arabidopsis thaliana GN=At3g26840 PE=1 SV=1	-	GO:0016747//transferase activity, transferring acyl groups other than amino-acyl groups	GO:0010287//plastoglobule
CL21202.Contig4_DB	3	13.02	14.44	10.73	12.73	5.68	8.56	4.18	6.14	3.37	4.88	4.65	4.3	--	-	-	-
CL17537.Contig1_DB	3	19.57	40.56	27.66	29.2633	7.75	6.49	15.95	10.0633	11.05	12.15	10.73	11.31	Phenolic glucoside malonyltransferase 1 OS=Arabidopsis thaliana GN=PMAT1 PE=1 SV=1	-	GO:0016740//transferase activity	-
Unigene35338_DB	3	73.2	103.04	58.36	78.2	24.71	14.61	35.99	25.1033	16	29.27	28.19	24.4867	--	-	-	-
CL20970.Contig1_DB	3	32.24	59.83	26.93	39.6667	12.8	11.34	12.72	12.2867	11.67	14.82	14.49	13.66	--	-	-	-
CL20639.Contig2_DB	3	27.9	46.34	28.22	34.1533	6.31	9.93	10.68	8.97333	3.74	4.82	5.92	4.82667	--	-	-	-
CL26352.Contig1_DB	3	232.32	479.67	235.74	315.91	71.65	64.22	120.71	85.5267	45.64	104.17	54.22	68.01	--	-	-	-
Unigene5435_DB	3	18.66	32.72	17	22.7933	4.39	5.55	9.72	6.55333	3.88	5.18	3.19	4.08333	--	-	-	-
CL727.Contig3_DB	3	95.34	162.51	72.91	110.253	27.33	39.99	63.17	43.4967	50.24	31.07	33.66	38.3233	--	-	-	-
CL5119.Contig3_DB	3	22.3	17.11	9.95	16.4533	2.8	5.47	7.02	5.09667	2.62	8.76	3.87	5.08333	Histone deacetylase 8 OS=Arabidopsis thaliana GN=HDA8 PE=2 SV=1	GO:0016575//histone deacetylation	GO:0004407//histone deacetylase activity	GO:0005634//nucleus
Unigene32615_DB	3	8.36	14.59	13.41	12.12	2.13	6.68	5.28	4.69667	2.34	3.68	3.85	3.29	--	-	-	-
CL28292.Contig3_DB	3	28.57	39.08	25.58	31.0767	8.6	8.45	14.56	10.5367	7.08	12.78	8.9	9.58667	--	-	-	-
CL12817.Contig1_DB	3	11.78	12.85	8.84	11.1567	4.12	11.34	8.1	7.85333	2.14	4.31	3	3.15	Peptidyl-prolyl cis-trans isomerase CYP40 OS=Arabidopsis thaliana GN=CYP40 PE=2 SV=1	GO:0006457//protein folding;GO:0010582//floral meristem determinacy;GO:0000413//protein peptidyl-prolyl isomerization;GO:0010050//vegetative phase change	GO:0003755//peptidyl-prolyl cis-trans isomerase activity	GO:0005737//cytoplasm
CL18199.Contig2_DB	3	11.42	10.27	9.24	10.31	1.88	3.98	6.3	4.05333	2.36	3.22	2.99	2.85667	Formin-like protein 1 OS=Oryza sativa subsp. japonica GN=FH1 PE=2 SV=1	-	-	-
CL597.Contig3_DB	3	43.9	43.12	22.38	36.4667	7	15.8	13.69	12.1633	6.37	13.92	11.07	10.4533	--	-	-	-
CL8746.Contig2_DB	3	80.13	138.46	69.06	95.8833	26.21	32.41	47.44	35.3533	19.65	54.91	29.98	34.8467	--	-	-	-
CL12160.Contig1_DB	3	17.29	13.23	11.38	13.9667	3.34	5.66	7.73	5.57667	3.03	5.7	3.56	4.09667	--	-	-	-
CL9802.Contig3_DB	3	43.65	73.88	49.11	55.5467	34.92	41.46	20.12	32.1667	17.21	15.85	16.83	16.63	Light-inducible protein CPRF2 OS=Petroselinum crispum GN=CPRF2 PE=2 SV=2	GO:0006355//regulation of transcription, DNA-dependent	GO:0003700//sequence-specific DNA binding transcription factor activity;GO:0043565//sequence-specific DNA binding	-
Unigene2486_DB	3	27.63	62.87	27.08	39.1933	5.44	10.57	12.34	9.45	3.84	8.82	5.47	6.04333	Protein argonaute 3 OS=Arabidopsis thaliana GN=AGO3 PE=3 SV=1	-	-	-
Unigene1373_DB	3	27.14	29.25	23.83	26.74	6.42	15.29	16.28	12.6633	9.32	14.65	8.47	10.8133	--	GO:0008152//metabolic process	GO:0003824//catalytic activity	-
CL25519.Contig2_DB	3	211.12	219.58	155.45	195.383	23.78	34.75	74.03	44.1867	40.56	34.58	28.03	34.39	--	-	-	-
CL845.Contig10_DB	3	26.1	17.29	2.65	15.3467	5.47	12.67	10.2	9.44667	2.08	2.64	2.59	2.43667	--	-	-	-
CL29188.Contig2_DB	3	19.13	22.74	17.14	19.67	6.33	4.85	11.74	7.64	4.96	9.61	9.17	7.91333	GDSL esterase/lipase At5g33370 OS=Arabidopsis thaliana GN=At5g33370 PE=2 SV=1	GO:0006629//lipid metabolic process	GO:0016788//hydrolase activity, acting on ester bonds	GO:0016023//cytoplasmic membrane-bounded vesicle
Unigene30103_DB	3	66.81	60.13	38.62	55.1867	4.81	20.95	24.89	16.8833	12.83	13.32	13.92	13.3567	--	-	-	-
Unigene39935_DB	3	29.18	26.63	15.11	23.64	2.16	6.1	7.15	5.13667	0.92	3.28	1.04	1.74667	Formin-like protein 3 OS=Oryza sativa subsp. japonica GN=FH3 PE=2 SV=2	-	-	-
Unigene42799_DB	3	14.84	13.21	9.05	12.3667	3.02	7.1	6.7	5.60667	5.56	5.36	3.73	4.88333	T-complex protein 1 subunit alpha OS=Arabidopsis thaliana GN=CCT1 PE=2 SV=1	GO:0006457//protein folding	GO:0005524//ATP binding;GO:0051082//unfolded protein binding	GO:0005737//cytoplasm;GO:0046658//anchored to plasma membrane;GO:0005618//cell wall
CL6732.Contig3_DB	3	13.66	12.02	8.8	11.4933	1.3	6.12	7.24	4.88667	3.23	4.1	1.93	3.08667	--	GO:0015031//protein transport	-	GO:0016020//membrane;GO:0016023//cytoplasmic membrane-bounded vesicle
CL24198.Contig1_DB	3	33.04	32.59	25.47	30.3667	12.9	10.39	16.39	13.2267	13.25	14.08	10.09	12.4733	Vegetative cell wall protein gp1 OS=Chlamydomonas reinhardtii GN=GP1 PE=2 SV=1	GO:0006629//lipid metabolic process	GO:0004806//triglyceride lipase activity	-
CL209.Contig7_DB	3	8.24	18.28	7.24	11.2533	2.63	6.62	8.36	5.87	1.63	3.5	1.24	2.12333	Auxin-responsive protein IAA14 OS=Oryza sativa subsp. japonica GN=IAA14 PE=2 SV=1	GO:0006417//regulation of translation;GO:0006355//regulation of transcription, DNA-dependent;GO:0009734//auxin mediated signaling pathway	GO:0046983//protein dimerization activity	GO:0009536//plastid;GO:0005634//nucleus
CL209.Contig12_DB	3	83.31	57.88	40.15	60.4467	24.89	25.7	19.52	23.37	14.04	13.71	11.19	12.98	Auxin-responsive protein IAA14 OS=Oryza sativa subsp. japonica GN=IAA14 PE=2 SV=1	GO:0006417//regulation of translation;GO:0006355//regulation of transcription, DNA-dependent;GO:0009734//auxin mediated signaling pathway	GO:0046983//protein dimerization activity	GO:0009536//plastid;GO:0005634//nucleus
CL2410.Contig4_DB	3	83.49	149.65	136.95	123.363	68.53	55.53	52.94	59	35.05	38.74	40.58	38.1233	Metal tolerance protein 5 OS=Oryza sativa subsp. japonica GN=MTP5 PE=2 SV=1	GO:0030026//cellular manganese ion homeostasis;GO:0046688//response to copper ion;GO:0071421//manganese ion transmembrane transport;GO:0010042//response to manganese ion	GO:0010486//manganese:hydrogen antiporter activity	GO:0016021//integral to membrane;GO:0005774//vacuolar membrane;GO:0005770//late endosome;GO:0005794//Golgi apparatus
CL10832.Contig1_DB	3	63.64	76.84	31.44	57.3067	16.28	19.21	26.54	20.6767	14.41	17.07	23.21	18.23	Transcription factor bHLH128 OS=Arabidopsis thaliana GN=BHLH128 PE=1 SV=1	-	-	-
CL22036.Contig7_DB	3	18.75	24.22	8.69	17.22	7	10.98	10.35	9.44333	5.46	5.36	5.55	5.45667	--	-	-	-
CL7750.Contig2_DB	3	27.4	25.38	6.96	19.9133	13.33	13.41	8.25	11.6633	6.38	3.28	4.61	4.75667	Zinc finger protein STAR3 OS=Oryza sativa subsp. japonica GN=STAR3 PE=2 SV=1	GO:0043620//regulation of DNA-dependent transcription in response to stress;GO:0010044//response to aluminum ion;GO:0045893//positive regulation of transcription, DNA-dependent	GO:0005488//binding	GO:0005634//nucleus
CL4731.Contig1_DB	3	50.09	72.34	42.66	55.03	15.77	14.31	24.86	18.3133	15.34	14.12	9.86	13.1067	Ultraviolet-B receptor UVR8 OS=Arabidopsis thaliana GN=UVR8 PE=1 SV=1	-	GO:0003682//chromatin binding;GO:0008536//Ran GTPase binding	-
CL15492.Contig3_DB	3	11.64	20.35	10.07	14.02	8.4	4.66	15.36	9.47333	3.21	4.83	5.66	4.56667	TATA-box-binding protein 2 OS=Triticum aestivum GN=TBP2 PE=2 SV=1	GO:0006352//DNA-dependent transcription, initiation;GO:0055114//oxidation-reduction process;GO:0006355//regulation of transcription, DNA-dependent	GO:0003677//DNA binding;GO:0032440//2-alkenal reductase [NAD(P)] activity	GO:0005634//nucleus
CL12373.Contig2_DB	3	24.61	29.68	18.39	24.2267	5.95	7.67	17.19	10.27	7.97	10.7	8.87	9.18	--	-	-	-
CL1509.Contig3_DB	3	15.31	16.66	8.89	13.62	3.17	5.93	8.24	5.78	1.81	3.36	2.52	2.56333	--	-	-	-
CL29339.Contig1_DB	3	18.64	21.72	11.02	17.1267	7.61	14.08	8.47	10.0533	3.42	2.73	5.67	3.94	Regulatory protein opaque-2 OS=Zea mays GN=O2 PE=1 SV=1	-	-	-
CL1484.Contig2_DB	3	15.89	12.97	7.62	12.16	0.81	3.84	7.81	4.15333	1.04	4.57	0.91	2.17333	--	-	-	-
CL2106.Contig6_DB	3	40.88	22.84	15.68	26.4667	4.26	10.61	13.44	9.43667	4.45	4.9	2.82	4.05667	--	-	-	-
CL1001.Contig1_DB	3	161.38	138.86	94.54	131.593	24.66	32.71	62.35	39.9067	26.54	37.74	21.13	28.47	--	-	-	-
CL25521.Contig11_DB	3	19.83	32.82	15.92	22.8567	4.16	11.84	8.88	8.29333	5.6	7.6	6.85	6.68333	--	-	-	-
CL13182.Contig4_DB	3	39.48	44.87	26.58	36.9767	9.89	19.73	21.01	16.8767	7.86	18.21	11.91	12.66	--	-	-	-
CL14682.Contig5_DB	3	13.45	12.22	9.61	11.76	3.85	6.41	7.38	5.88	2.44	4.53	5.55	4.17333	--	-	-	-
CL6433.Contig2_DB	3	91.12	85.24	23.37	66.5767	6.81	18.18	23.71	16.2333	15.36	3.27	4.85	7.82667	--	-	-	-
CL5514.Contig1_DB	3	48.48	75.9	45.33	56.57	13.43	11.31	40.22	21.6533	7.95	16.32	5.82	10.03	CASP-like protein Sb04g002820 OS=Sorghum bicolor GN=Sb04g002820 PE=3 SV=1	-	-	-
CL831.Contig2_DB	3	31.01	32.73	19.51	27.75	7.8	12.06	20.63	13.4967	9.45	13.87	5.68	9.66667	Auxin-responsive protein IAA10 OS=Oryza sativa subsp. japonica GN=IAA10 PE=2 SV=2	GO:0006417//regulation of translation;GO:0006355//regulation of transcription, DNA-dependent;GO:0009734//auxin mediated signaling pathway	GO:0046983//protein dimerization activity	GO:0005634//nucleus
CL15972.Contig4_DB	3	24.83	19.85	14.25	19.6433	3.42	7.89	11.15	7.48667	3.59	7.21	5.47	5.42333	Potassium transporter 24 OS=Oryza sativa subsp. japonica GN=HAK24 PE=2 SV=1	GO:0006139//nucleobase-containing compound metabolic process;GO:0006813//potassium ion transport	GO:0003676//nucleic acid binding;GO:0008408//3'-5' exonuclease activity;GO:0000166//nucleotide binding	GO:0016020//membrane;GO:0005739//mitochondrion
CL10981.Contig1_DB	3	151.31	194.17	58.8	134.76	47.3	52.45	63.88	54.5433	24.37	44.96	41.05	36.7933	Ethylene-responsive transcription factor 9 OS=Arabidopsis thaliana GN=ERF9 PE=2 SV=1	GO:0006355//regulation of transcription, DNA-dependent	GO:0003700//sequence-specific DNA binding transcription factor activity;GO:0003677//DNA binding	GO:0005634//nucleus;GO:0009536//plastid
CL996.Contig1_DB	3	12.13	21.75	9.74	14.54	4.53	7.27	10.48	7.42667	6.96	5.27	4.87	5.7	Disease resistance protein RPM1 OS=Arabidopsis thaliana GN=RPM1 PE=1 SV=1	GO:0006952//defense response;GO:0006915//apoptotic process	GO:0005524//ATP binding	GO:0016023//cytoplasmic membrane-bounded vesicle
CL14612.Contig3_DB	3	67.67	109.16	25.11	67.3133	40.83	32.3	28.38	33.8367	18.38	18.91	25.3	20.8633	NAC domain-containing protein 67 OS=Oryza sativa subsp. japonica GN=NAC67 PE=2 SV=1	GO:0050896//response to stimulus;GO:0006355//regulation of transcription, DNA-dependent	GO:0003677//DNA binding	-
CL6433.Contig4_DB	3	314.45	290.44	199.65	268.18	43.09	69.48	125.95	79.5067	39.85	53.55	27.41	40.27	--	-	-	-
CL2376.Contig6_DB	3	31.63	26.85	15.69	24.7233	8.71	15.44	14.18	12.7767	5.14	8.92	7.88	7.31333	--	-	-	-
CL5119.Contig2_DB	3	216.45	151.19	90.33	152.657	53.29	57.27	99.08	69.88	46.29	91.35	50.11	62.5833	Histone deacetylase 8 OS=Arabidopsis thaliana GN=HDA8 PE=2 SV=1	GO:0016575//histone deacetylation	GO:0004407//histone deacetylase activity	GO:0005634//nucleus
CL18945.Contig3_DB	3	32.01	21.2	10.68	21.2967	5.27	10.24	17.7	11.07	5.92	6.29	5.71	5.97333	Sulfated surface glycoprotein 185 OS=Volvox carteri PE=1 SV=1	-	-	-
CL26486.Contig1_DB	3	12.48	16.48	7.62	12.1933	4.88	3.05	10.58	6.17	4.64	2.7	2.38	3.24	--	-	-	-
CL15599.Contig2_DB	3	12.22	40.35	12.16	21.5767	17.14	4.96	12.09	11.3967	3.28	2.96	5.73	3.99	Cytosolic sulfotransferase 8 OS=Arabidopsis thaliana GN=SOT8 PE=2 SV=1	-	GO:0016740//transferase activity	-
CL10294.Contig4_DB	3	14.66	17.15	13.36	15.0567	5.12	8.85	8.76	7.57667	4.61	7.56	2.98	5.05	--	-	-	-
CL24203.Contig1_DB	3	1719.25	1077.62	833.62	1210.16	467.07	645.93	903.21	672.07	402.19	586.76	339.53	442.827	Ubiquitin-conjugating enzyme E2 28 OS=Arabidopsis thaliana GN=UBC28 PE=2 SV=1	GO:0051788//response to misfolded protein;GO:0006635//fatty acid beta-oxidation;GO:0043161//proteasomal ubiquitin-dependent protein catabolic process;GO:0006944//cellular membrane fusion;GO:0016558//protein import into peroxisome matrix;GO:0051510//regulation of unidimensional cell growth;GO:0048193//Golgi vesicle transport;GO:0042023//DNA endoreduplication;GO:0006301//postreplication repair;GO:0…	GO:0004842//ubiquitin-protein ligase activity	GO:0005737//cytoplasm;GO:0005886//plasma membrane;GO:0005634//nucleus
CL7106.Contig5_DB	3	73.1	71.33	50.98	65.1367	32.55	24.66	28.94	28.7167	5.61	10.47	19.81	11.9633	NAC domain-containing protein 71 OS=Oryza sativa subsp. japonica GN=NAC71 PE=2 SV=1	-	-	-
CL26829.Contig1_DB	3	19.53	33.92	26.98	26.81	6.44	14	21.93	14.1233	6.74	9.75	13.34	9.94333	Vegetative cell wall protein gp1 OS=Chlamydomonas reinhardtii GN=GP1 PE=2 SV=1	GO:0008152//metabolic process	GO:0016787//hydrolase activity	-
CL1089.Contig18_DB	3	23.78	20.2	17.82	20.6	6.26	4.77	12.66	7.89667	4.92	4.21	9.21	6.11333	--	-	-	-
Unigene44975_DB	3	18	20.32	6.66	14.9933	2.82	3.74	9.63	5.39667	1.48	4.29	1.33	2.36667	--	-	-	-
CL5419.Contig1_DB	3	31.66	27.22	17.53	25.47	12.78	16.6	15.59	14.99	10.42	14.54	7.31	10.7567	Proline-rich receptor-like protein kinase PERK2 OS=Arabidopsis thaliana GN=PERK2 PE=2 SV=3	GO:0006944//cellular membrane fusion;GO:0048193//Golgi vesicle transport	GO:0003676//nucleic acid binding	GO:0044424//intracellular part
Unigene35543_DB	3	22.8	17.93	8.07	16.2667	7.22	5.55	7.11	6.62667	2.88	1.09	3.7	2.55667	--	-	GO:0004386//helicase activity;GO:0005524//ATP binding	GO:0016023//cytoplasmic membrane-bounded vesicle
CL8165.Contig2_DB	3	23.77	22.59	16.06	20.8067	6.31	12.17	13.66	10.7133	5.54	2.09	2.16	3.26333	--	-	-	-
CL562.Contig3_DB	3	69.12	144.97	70.72	94.9367	21.24	28.78	47.16	32.3933	5.23	9.02	6.71	6.98667	Protein LHY OS=Arabidopsis thaliana GN=LHY PE=1 SV=2	-	GO:0005488//binding	-
CL15424.Contig1_DB	3	39.65	36.63	26.75	34.3433	13.76	15.13	19.53	16.14	5.91	15.26	7.62	9.59667	--	-	-	-
Unigene40977_DB	3	49.18	109.91	60.7	73.2633	19.27	29.91	55.27	34.8167	23.19	38.15	24.37	28.57	Ent-kaurenoic acid oxidase 1 OS=Hordeum vulgare GN=KAO1 PE=1 SV=1	GO:0009686//gibberellin biosynthetic process;GO:0055114//oxidation-reduction process	GO:0009055//electron carrier activity;GO:0004497//monooxygenase activity;GO:0005506//iron ion binding;GO:0020037//heme binding;GO:0016705//oxidoreductase activity, acting on paired donors, with incorporation or reduction of molecular oxygen	GO:0016023//cytoplasmic membrane-bounded vesicle;GO:0016021//integral to membrane
CL21283.Contig1_DB	3	16.1	19.03	12.61	15.9133	4.2	4.21	7.41	5.27333	1.33	5.65	1.13	2.70333	--	GO:0009651//response to salt stress	-	GO:0005783//endoplasmic reticulum;GO:0005618//cell wall;GO:0005794//Golgi apparatus;GO:0009507//chloroplast
CL7896.Contig2_DB	3	13.86	4.73	18.17	12.2533	11.57	10.25	9.31	10.3767	5.64	5.44	3.99	5.02333	Early nodulin-20 OS=Medicago truncatula GN=ENOD20 PE=3 SV=1	GO:0008152//metabolic process	GO:0005507//copper ion binding;GO:0016787//hydrolase activity	GO:0016023//cytoplasmic membrane-bounded vesicle;GO:0005739//mitochondrion
CL22483.Contig1_DB	3	6.86	13.47	9.13	9.82	6.92	4.42	8.07	6.47	2.85	2.02	1.89	2.25333	Lysine-rich arabinogalactan protein 19 OS=Arabidopsis thaliana GN=AGP19 PE=2 SV=2	GO:0055085//transmembrane transport;GO:0006508//proteolysis	GO:0004252//serine-type endopeptidase activity;GO:0070008//serine-type exopeptidase activity	GO:0009507//chloroplast;GO:0016020//membrane
CL4012.Contig1_DB	3	70.2	167.88	48.24	95.44	28.49	27.65	51.34	35.8267	28.65	26.46	35.96	30.3567	Chaperone protein dnaJ 1, mitochondrial OS=Arabidopsis thaliana GN=ATJ1 PE=2 SV=2	-	-	GO:0009536//plastid
CL16905.Contig1_DB	3	209.89	217.41	21	149.433	133.3	112.34	113.59	119.743	62.49	62.98	66.57	64.0133	--	-	-	-
CL13789.Contig1_DB	3	26.75	26.45	29.15	27.45	4.85	5.58	8.91	6.44667	8.86	6.49	10.15	8.5	--	-	-	-
CL4444.Contig2_DB	3	44.66	44.4	37.28	42.1133	19.28	14.95	33.96	22.73	11.5	18.55	18.63	16.2267	Bidirectional sugar transporter SWEET2b OS=Oryza sativa subsp. japonica GN=SWEET2B PE=2 SV=1	GO:0008643//carbohydrate transport	GO:0051119//sugar transmembrane transporter activity	GO:0005887//integral to plasma membrane;GO:0016023//cytoplasmic membrane-bounded vesicle
CL19900.Contig2_DB	3	84.48	69.29	84.15	79.3067	20.54	27.26	17.6	21.8	30.41	28.4	18.58	25.7967	Probable ADP,ATP carrier protein At5g56450 OS=Arabidopsis thaliana GN=At5g56450 PE=2 SV=1	GO:0055085//transmembrane transport;GO:0006839//mitochondrial transport;GO:0048653//anther development	GO:0005347//ATP transmembrane transporter activity	GO:0016021//integral to membrane;GO:0005743//mitochondrial inner membrane
CL26318.Contig6_DB	3	16.46	23.98	10.92	17.12	0.14	4.32	4.26	2.90667	3.48	3.47	3.69	3.54667	Elongator complex protein 4 OS=Arabidopsis thaliana GN=ELP4 PE=1 SV=1	-	-	-
CL22125.Contig2_DB	3	51.14	25.38	30.16	35.56	8.56	11.34	16.34	12.08	13.97	13.97	12.14	13.36	BTB/POZ and MATH domain-containing protein 3 OS=Arabidopsis thaliana GN=BPM3 PE=1 SV=1	GO:0071472//cellular response to salt stress;GO:0031396//regulation of protein ubiquitination	GO:0042802//identical protein binding	GO:0005634//nucleus;GO:0005829//cytosol
CL6001.Contig3_DB	3	19.5	5.45	8.3	11.0833	1.29	1.07	0	0.786667	0.89	2.07	0.89	1.28333	Formin-like protein 3 OS=Oryza sativa subsp. japonica GN=FH3 PE=2 SV=2	-	-	-
CL12755.Contig1_DB	3	54.24	20.75	74.89	49.96	25.82	17.29	17.35	20.1533	14.82	17.29	15.63	15.9133	Basic endochitinase A OS=Secale cereale GN=rsca PE=1 SV=1	GO:0006032//chitin catabolic process;GO:0016998//cell wall macromolecule catabolic process;GO:0009871//jasmonic acid and ethylene-dependent systemic resistance, ethylene mediated signaling pathway;GO:0046686//response to cadmium ion;GO:0050832//defense response to fungus;GO:0000272//polysaccharide catabolic process	GO:0008843//endochitinase activity;GO:0008061//chitin binding	GO:0016023//cytoplasmic membrane-bounded vesicle;GO:0005773//vacuole;GO:0005886//plasma membrane
CL29418.Contig1_DB	3	63	50.21	51.65	54.9533	22.5	26.15	23.55	24.0667	21.81	31.24	15.86	22.97	Serine/arginine-rich splicing factor RSZ21 OS=Oryza sativa subsp. japonica GN=RSZP21 PE=2 SV=1	GO:0000398//mRNA splicing, via spliceosome	GO:0003676//nucleic acid binding;GO:0005515//protein binding;GO:0008270//zinc ion binding;GO:0000166//nucleotide binding	GO:0005730//nucleolus;GO:0016607//nuclear speck;GO:0005829//cytosol
CL19628.Contig1_DB	3	12.58	8.29	8.47	9.78	1.19	4.28	2.68	2.71667	4.22	2.73	2.85	3.26667	Proline-rich receptor-like protein kinase PERK8 OS=Arabidopsis thaliana GN=PERK8 PE=1 SV=1	-	-	-
Unigene37639_DB	3	26.46	24.6	30.89	27.3167	10.23	9.22	17.43	12.2933	12.87	14.65	7.23	11.5833	F-box protein FBW2 OS=Arabidopsis thaliana GN=FBW2 PE=1 SV=1	-	-	-
CL6001.Contig1_DB	3	88.58	84.92	95.76	89.7533	34.81	19.99	34.12	29.64	22.7	24.81	29.49	25.6667	--	-	-	-
Unigene106_DB	3	20.2	6.52	5.42	10.7133	3.27	0.68	2.18	2.04333	1.87	1.18	1.54	1.53	Bifunctional monodehydroascorbate reductase and carbonic anhydrase nectarin-3 OS=Nicotiana langsdorffii x Nicotiana sanderae GN=NEC3 PE=1 SV=1	GO:0006730//one-carbon metabolic process	GO:0004089//carbonate dehydratase activity;GO:0008270//zinc ion binding	GO:0016023//cytoplasmic membrane-bounded vesicle
Unigene38654_DB	3	21.18	18.6	31.87	23.8833	11.17	9.9	4.09	8.38667	3.68	5.81	8.43	5.97333	Importin subunit alpha-1b OS=Oryza sativa subsp. japonica GN=Os05g0155500 PE=1 SV=2	GO:0009407//toxin catabolic process;GO:0006606//protein import into nucleus	GO:0008565//protein transporter activity	GO:0005730//nucleolus;GO:0009506//plasmodesma;GO:0005829//cytosol
CL13009.Contig2_DB	3	231.4	301.68	221.27	251.45	122.84	91.51	99.94	104.763	82.24	66.79	74.47	74.5	Cell number regulator 2 OS=Zea mays GN=CNR2 PE=2 SV=1	GO:0008285//negative regulation of cell proliferation	-	GO:0016021//integral to membrane
CL20707.Contig1_DB	3	6.31	7.96	6.81	7.02667	0.46	2.67	4.44	2.52333	1.68	2.31	1.36	1.78333	--	-	-	-
CL1584.Contig2_DB	3	16.82	18.97	16.66	17.4833	11.72	2.25	6.85	6.94	4.98	6.32	2.91	4.73667	Inactive disease susceptibility protein LOV1 OS=Arabidopsis thaliana GN=LOV1 PE=3 SV=1	GO:0006952//defense response	GO:0043531//ADP binding	-
Unigene2453_DB	3	15.79	13.66	17.73	15.7267	5.43	6.11	3.85	5.13	1.82	5.88	4.07	3.92333	--	-	-	-
Unigene4309_DB	3	40.35	23.47	26.51	30.11	4.84	14.39	12.97	10.7333	9.25	8.16	8.88	8.76333	--	-	-	-
CL11931.Contig1_DB	3	16.06	14.97	12.75	14.5933	5.02	5.43	10.49	6.98	5.98	5.23	3	4.73667	--	-	GO:0003725//double-stranded RNA binding	GO:0005739//mitochondrion
Unigene32329_DB	3	42.46	13.29	82.5	46.0833	10.07	5.53	13.84	9.81333	12.16	15.24	10.46	12.62	--	-	-	-
CL7146.Contig1_DB	3	25.39	13.22	24.64	21.0833	9.47	12.32	12.07	11.2867	8.75	8.97	8.57	8.76333	Probable LRR receptor-like serine/threonine-protein kinase At5g10290 OS=Arabidopsis thaliana GN=At5g10290 PE=1 SV=1	GO:0006468//protein phosphorylation	GO:0005524//ATP binding;GO:0004674//protein serine/threonine kinase activity	GO:0005886//plasma membrane;GO:0016021//integral to membrane
Unigene4025_DB	3	12.6	10.07	8.87	10.5133	4.91	5.42	5.83	5.38667	3.34	5.24	2.86	3.81333	--	-	-	GO:0005886//plasma membrane
CL8082.Contig1_DB	3	28.14	29.55	27.63	28.44	23.61	14.06	1.65	13.1067	10.57	11.18	7.19	9.64667	Glutenin, high molecular weight subunit PW212 OS=Triticum aestivum PE=3 SV=1	-	-	-
CL4471.Contig2_DB	3	413.46	516.12	197.93	375.837	121.71	180.04	216.95	172.9	128.81	132.1	86.62	115.843	--	-	-	-
CL13201.Contig1_DB	3	1094.21	1510.65	1020.41	1208.42	475.22	661.96	763.9	633.693	521.17	452.2	427.6	466.99	Formin-like protein 7 OS=Arabidopsis thaliana GN=FH7 PE=2 SV=1	GO:0008152//metabolic process	GO:0008967//phosphoglycolate phosphatase activity	GO:0005739//mitochondrion
CL22639.Contig1_DB	3	53.14	27.02	64.48	48.2133	14.24	16.69	23.27	18.0667	10.46	6.57	13.72	10.25	Ankyrin repeat-containing protein At3g12360 OS=Arabidopsis thaliana GN=At3g12360 PE=2 SV=1	GO:0009651//response to salt stress	-	GO:0009536//plastid;GO:0005886//plasma membrane
CL4304.Contig4_DB	3	13.09	11.4	11.86	12.1167	6.75	8.52	9.3	8.19	5.01	4.72	5.19	4.97333	--	GO:0016926//protein desumoylation;GO:0050665//hydrogen peroxide biosynthetic process;GO:0010228//vegetative to reproductive phase transition of meristem	-	GO:0005886//plasma membrane;GO:0044424//intracellular part
CL25878.Contig2_DB	3	28.5	25.76	28.57	27.61	0	19.72	14.63	11.45	5.33	8.7	0	4.67667	Zeaxanthin epoxidase, chloroplastic OS=Oryza sativa subsp. japonica GN=ZEP PE=2 SV=1	GO:0022900//electron transport chain;GO:0009414//response to water deprivation;GO:0010114//response to red light;GO:0050891//multicellular organismal water homeostasis;GO:0016123//xanthophyll biosynthetic process;GO:0009408//response to heat;GO:0006970//response to osmotic stress;GO:0009737//response to abscisic acid stimulus;GO:0006725//cellular aromatic compound metabolic process;GO:0009688//ab…	GO:0052662;GO:0052663;GO:0009540//zeaxanthin epoxidase [overall] activity	GO:0009535//chloroplast thylakoid membrane;GO:0031969//chloroplast membrane
CL4154.Contig1_DB	3	11.52	8.28	7.66	9.15333	4.09	4.4	7.49	5.32667	3.87	4.88	1.72	3.49	Vegetative cell wall protein gp1 OS=Chlamydomonas reinhardtii GN=GP1 PE=2 SV=1	GO:0006351//transcription, DNA-dependent	GO:0003887//DNA-directed DNA polymerase activity;GO:0003677//DNA binding	GO:0005829//cytosol
CL24241.Contig1_DB	3	18.42	13.34	15.34	15.7	8.52	9.08	5.7	7.76667	5.13	7.16	3.66	5.31667	--	-	-	-
CL16136.Contig2_DB	3	19.46	14.15	12.85	15.4867	4.48	6.84	9	6.77333	4.55	7.5	4.09	5.38	Xanthine dehydrogenase OS=Oryza sativa subsp. japonica GN=XDH PE=2 SV=1	GO:0055114//oxidation-reduction process;GO:0009414//response to water deprivation;GO:0000302//response to reactive oxygen species;GO:0006145//purine nucleobase catabolic process;GO:0042554//superoxide anion generation;GO:0046110//xanthine metabolic process	GO:0051537//2 iron, 2 sulfur cluster binding;GO:0009055//electron carrier activity;GO:0004855//xanthine oxidase activity;GO:0004854//xanthine dehydrogenase activity;GO:0050660//flavin adenine dinucleotide binding;GO:0008762//UDP-N-acetylmuramate dehydrogenase activity;GO:0005506//iron ion binding	GO:0005829//cytosol
CL5909.Contig1_DB	3	16.59	13.71	16.8	15.7	6.34	9.31	10.44	8.69667	6.38	7.7	3.46	5.84667	Structural maintenance of chromosomes protein 2-1 OS=Arabidopsis thaliana GN=SMC2-1 PE=2 SV=2	GO:0000278//mitotic cell cycle;GO:0031048//chromatin silencing by small RNA;GO:0006346//methylation-dependent chromatin silencing;GO:0010165//response to X-ray;GO:0007267//cell-cell signaling;GO:0006275//regulation of DNA replication;GO:0006261//DNA-dependent DNA replication;GO:0051567//histone H3-K9 methylation;GO:0045132//meiotic chromosome segregation;GO:0033044//regulation of chromosome organ…	GO:0005524//ATP binding	GO:0030915//Smc5-Smc6 complex;GO:0005634//nucleus
CL26457.Contig1_DB	3	20.63	14.65	19.7	18.3267	10.18	13.31	9.35	10.9467	8.9	8	4.51	7.13667	Probable S-acyltransferase At2g14255 OS=Arabidopsis thaliana GN=At2g14255 PE=2 SV=2	-	GO:0016491//oxidoreductase activity;GO:0008270//zinc ion binding;GO:0016740//transferase activity	GO:0016020//membrane
[truncated: 2,988 more rows]

## Sheet: Drought
Table S2-2. Gene Expression Clusters in Drought Dataset
[truncated: 5,130 more rows]
