# Supplementary material for: Flexible response and rapid recovery strategies of the plateau forage Poa crymophila to cold and drought
Source: Front Plant Sci. 2022 Nov 8;13:970496. doi: 10.3389/fpls.2022.970496 (PMC9681527; doi:10.3389/fpls.2022.970496)
Supplement: Supplementary Table 3 — The results of consensus analysis. [file Table_3.xlsx]

## Sheet: The results of consensus analys
Table S3-1. The results of consensus analysis
GeneSymbol	CM_NUMBER	ModuleColor	kME.Cold.ME1	kME.Dro.ME1	p.kME.Cold.ME1	p.kME.Dro.ME1	kME.Cold.ME2	kME.Dro.ME2	p.kME.Cold.ME2	p.kME.Dro.ME2	kME.Cold.ME3	kME.Dro.ME3	p.kME.Cold.ME3	p.kME.Dro.ME3	kME.Cold.ME4	kME.Dro.ME4	p.kME.Cold.ME4	p.kME.Dro.ME4	kME.Cold.ME5	kME.Dro.ME5	p.kME.Cold.ME5	p.kME.Dro.ME5	kME.Cold.ME6	kME.Dro.ME6	p.kME.Cold.ME6	p.kME.Dro.ME6	kME.Cold.ME7	kME.Dro.ME7	p.kME.Cold.ME7	p.kME.Dro.ME7	kME.Cold.ME8	kME.Dro.ME8	p.kME.Cold.ME8	p.kME.Dro.ME8	kME.Cold.ME9	kME.Dro.ME9	p.kME.Cold.ME9	p.kME.Dro.ME9	kME.Cold.ME10	kME.Dro.ME10	p.kME.Cold.ME10	p.kME.Dro.ME10	kME.Cold.ME11	kME.Dro.ME11	p.kME.Cold.ME11	p.kME.Dro.ME11	kME.Cold.ME12	kME.Dro.ME12	p.kME.Cold.ME12
Unigene33775_DB	1	turquoise	-0.612851	0.78717	0.0793014	0.0118086	0.0284702	0.747382	0.94204	0.020625	-0.652157	0.260109	0.0569663	0.499084	0.492197	0.801334	0.178315	0.00941824	-0.678406	0.385001	0.0445578	0.306216	-0.01692	0.526793	0.965539	0.145068	0.238557	0.840615	0.536477	0.00453744	-0.543822	0.687715	0.130153	0.0406164	-0.0142622	0.0317742	0.97095	0.935325	-0.0157986	0.154212	0.967822	0.692001	0.54401	0.514651	0.129994	0.156286	0.24244	0.424076	0.529661
CL12534.Contig2_DB	1	turquoise	0.714657	0.772115	0.0304984	0.0147636	0.013386	0.825942	0.972734	0.00608258	0.688672	-0.070369	0.0402242	0.857236	-0.561115	0.733647	0.115978	0.0244616	0.741713	0.626442	0.022156	0.0710538	0.0418218	0.00242704	0.914925	0.995056	0.0317415	0.689048	0.935391	0.0400712	0.131777	0.859585	0.735401	0.00296933	-0.0820694	-0.0574528	0.833745	0.88328	0.0256721	0.404401	0.94773	0.280338	-0.630843	0.652189	0.0685032	0.0569498	0.0337699	0.756704	0.93127
CL6985.Contig1_DB	1	turquoise	-0.68402	0.770853	0.0421527	0.0150315	-0.549374	0.833549	0.125496	0.00524309	-0.612778	-0.0934546	0.0793471	0.810996	0.0642068	0.722619	0.869647	0.0278609	-0.618645	0.711483	0.0757162	0.0315938	-0.569627	0.0976884	0.109357	0.802567	0.0455198	0.719915	0.907428	0.0287391	0.0724965	0.853904	0.852957	0.0033917	0.631601	-0.116962	0.0680696	0.764427	-0.530258	0.496034	0.141956	0.174432	0.094157	0.776882	0.809597	0.0137799	0.0337006	0.784212	0.931411
CL9742.Contig1_DB	1	turquoise	-0.955982	0.669715	5.64297e-05	0.0484518	-0.688668	0.75038	0.0402259	0.0198444	-0.974806	-0.184118	8.15393e-06	0.635353	0.0547386	0.604117	0.888765	0.0849007	-0.957892	0.635516	4.84078e-05	0.0658586	-0.719341	-0.142273	0.028928	0.715009	0.234307	0.555999	0.543976	0.12007	-0.576717	0.796871	0.10402	0.0101323	0.732504	-0.107883	0.0248004	0.782344	-0.705724	0.494856	0.0336458	0.175619	0.122016	0.645805	0.754495	0.0602647	0.22959	0.771957	0.552344
CL29478.Contig1_DB	1	turquoise	-0.703735	-0.349177	0.0343743	0.35703	0.030028	-0.313986	0.938873	0.410599	-0.659392	-0.16208	0.0533514	0.676957	0.701757	-0.359568	0.0351089	0.341896	-0.701037	-0.132715	0.0353787	0.733571	-0.0415174	-0.419953	0.915543	0.260446	0.511702	-0.403188	0.159084	0.281922	-0.138637	-0.229899	0.722055	0.551795	0.00969054	0.0708163	0.98026	0.856336	-0.00166244	-0.0495721	0.996613	0.899219	0.684186	-0.221554	0.042083	0.566711	0.506544	-0.112016	0.164048
CL12054.Contig1_DB	1	turquoise	0.84303	0.912487	0.00431212	0.000598752	0.109452	0.821372	0.779239	0.00662869	0.827032	0.651869	0.00595703	0.0571132	-0.556929	0.960725	0.119319	3.80414e-05	0.872159	0.0812623	0.00216589	0.835362	0.134258	0.724111	0.730567	0.0273841	0.0396129	0.954045	0.919407	6.54848e-05	0.280316	0.741774	0.465029	0.0221393	-0.170233	0.54949	0.661471	0.125399	0.120607	-0.219653	0.757261	0.570129	-0.634548	0.233247	0.0664009	0.545852	0.054346	0.277327	0.889559
CL18518.Contig1_DB	1	turquoise	-0.759905	-0.781493	0.0174945	0.012871	0.0411296	-0.691838	0.916329	0.0389452	-0.765376	-0.699813	0.0162327	0.0358402	0.629641	-0.843351	0.0691942	0.00428271	-0.811739	0.0844295	0.007887	0.82902	0.0119607	-0.609171	0.975637	0.0816321	0.0126662	-0.800395	0.9742	0.00956556	-0.354875	-0.623646	0.348691	0.0727047	0.00356613	-0.704793	0.992735	0.0339855	0.0221762	0.36479	0.954841	0.33441	0.705151	-0.02949	0.0338549	0.939967	-0.0019078	-0.156968	0.996113
CL6721.Contig1_DB	1	turquoise	-0.874561	0.887902	0.00203169	0.0013894	-0.799126	0.936766	0.00976708	0.000196724	-0.856542	0.0789748	0.00319077	0.839948	-0.0769677	0.843379	0.843975	0.00428012	-0.831044	0.616886	0.00551019	0.0767939	-0.819202	0.0931955	0.0068993	0.811512	0.225923	0.807713	0.558883	0.00845772	-0.332139	0.955298	0.382528	5.95173e-05	0.848647	0.164034	0.00381772	0.673235	-0.793923	0.391007	0.0106235	0.298079	-0.0396112	0.685975	0.91941	0.0413351	0.210263	0.787715	0.587124
CL13201.Contig1_DB	1	turquoise	0.932648	0.446583	0.000244332	0.228188	0.305102	0.43083	0.424669	0.246995	0.88591	0.298067	0.00147477	0.435961	-0.523719	0.452548	0.147862	0.221279	0.915398	0.0642924	0.00053346	0.869475	0.365246	0.0821286	0.33376	0.833627	-0.393147	0.405464	0.295207	0.278953	0.21139	0.430745	0.585076	0.247098	-0.370337	0.436926	0.326548	0.239622	0.32469	-0.0578615	0.393935	0.882454	-0.542863	0.096733	0.130968	0.804467	-0.384933	0.224441	0.306309
CL24203.Contig1_DB	1	turquoise	0.890822	0.811514	0.00127056	0.00791821	0.165527	0.824185	0.670396	0.00628879	0.8653	0.186286	0.00258245	0.631305	-0.568388	0.765409	0.110306	0.0162252	0.906005	0.514691	0.000763884	0.156249	0.202221	0.368989	0.60182	0.328451	-0.101377	0.790171	0.795236	0.0112715	0.26629	0.803045	0.48856	0.00915364	-0.226707	0.175981	0.557482	0.650619	0.180226	0.315563	0.64264	0.408126	-0.62708	0.649557	0.0706806	0.0583022	-0.0888835	0.626173	0.820116
CL6468.Contig3_DB	1	turquoise	0.730277	0.859647	0.0254697	0.00296491	0.765104	0.937968	0.0162939	0.000184167	0.799722	-0.0615772	0.00967199	0.874952	0.204861	0.792784	0.596982	0.0108174	0.737545	0.742365	0.0233286	0.0219763	0.795537	0.0335051	0.0103526	0.931808	-0.599725	0.764856	0.0878064	0.0163497	0.731571	0.966247	0.0250792	2.25053e-05	-0.75001	0.0184694	0.0199396	0.962385	0.7862	0.526435	0.0119857	0.145392	0.187399	0.805622	0.629231	0.00876482	-0.591237	0.885367	0.0935933
CL1768.Contig1_DB	1	turquoise	-0.726263	-0.77758	0.0267055	0.0136397	-0.330683	-0.675644	0.384746	0.0457726	-0.764481	-0.602962	0.0164348	0.0856591	0.169752	-0.831173	0.662381	0.00549623	-0.773046	-0.0159897	0.0145679	0.967433	-0.35355	-0.66866	0.350622	0.0489387	-0.126597	-0.838577	0.745518	0.00473389	-0.592068	-0.6008	0.0930166	0.08709	0.379714	-0.463119	0.313471	0.209318	-0.357347	0.231388	0.345103	0.549147	0.282921	-0.154989	0.460712	0.690511	-0.117758	-0.163375	0.76286
CL13383.Contig1_DB	1	turquoise	-0.956522	-0.665711	5.40749e-05	0.0503164	-0.475795	-0.517433	0.19546	0.153673	-0.930958	-0.804423	0.000266018	0.00894441	0.308871	-0.75176	0.418674	0.0194917	-0.945226	0.237623	0.000120005	0.538121	-0.504156	-0.898196	0.166374	0.00100215	0.123517	-0.78013	0.75155	0.0131355	-0.299448	-0.391867	0.433733	0.296924	0.540224	-0.601346	0.133225	0.0867274	-0.478509	0.472449	0.192562	0.199066	0.368242	0.0675546	0.329507	0.862901	0.106581	0.109229	0.784919
CL6935.Contig1_DB	1	turquoise	0.545673	0.536083	0.128589	0.136813	-0.00364885	0.477131	0.992567	0.19403	0.532499	0.398132	0.139964	0.288572	-0.396196	0.54313	0.291139	0.13074	0.581406	0.0186621	0.10058	0.961993	-0.000159146	0.564275	0.999676	0.113493	0.291928	0.544823	0.445922	0.129306	0.103118	0.398335	0.791783	0.288303	-0.0637732	0.290228	0.870522	0.448696	-0.00335769	-0.144945	0.99316	0.709842	-0.491758	0.129309	0.178763	0.740217	0.295469	0.154589	0.440164
CL10526.Contig1_DB	1	turquoise	-0.76597	0.648155	0.0160994	0.0590307	-0.596399	0.608516	0.090047	0.082051	-0.768887	0.229301	0.0154555	0.552859	-0.0390785	0.651681	0.920491	0.0572095	-0.762477	0.282776	0.0168934	0.460952	-0.592062	0.539499	0.093021	0.133849	-0.199842	0.699736	0.606191	0.0358695	-0.356765	0.52683	0.345946	0.145035	0.654965	-0.019552	0.0555452	0.960182	-0.587556	0.131162	0.0961733	0.736601	0.058068	0.41382	0.882037	0.268199	-0.211403	0.312351	0.585051
CL11398.Contig2_DB	1	turquoise	0.943574	-0.73072	0.000132938	0.0253354	0.373605	-0.61606	0.32196	0.0773029	0.918219	-0.712384	0.000475095	0.0312802	-0.398266	-0.800269	0.288395	0.0095853	0.943076	0.133183	0.000137018	0.732661	0.402218	-0.66407	0.283191	0.0510935	-0.115406	-0.78679	0.767491	0.0118778	0.279862	-0.540596	0.465782	0.132905	-0.437121	-0.641308	0.239388	0.0626709	0.379339	0.380103	0.313989	0.312934	-0.458266	0.00395884	0.214763	0.991935	-0.0992016	-0.057751	0.799558
CL12091.Contig3_DB	1	turquoise	0.929072	0.850439	0.00029178	0.00366859	0.575757	0.767991	0.104734	0.0156515	0.944114	0.589369	0.000128608	0.0948973	-0.14825	0.872028	0.703464	0.00217337	0.936398	0.166066	0.00020069	0.669373	0.597509	0.778168	0.0892951	0.0135221	-0.219758	0.907792	0.56994	0.000715551	0.469836	0.678057	0.201909	0.0447102	-0.616578	0.453379	0.0769832	0.220325	0.583381	-0.103013	0.0991514	0.79199	-0.210736	0.348261	0.586264	0.358379	-0.207012	0.294976	0.593051
CL16988.Contig2_DB	1	turquoise	-0.674236	-0.898558	0.0463999	0.000990098	0.0285355	-0.79672	0.941907	0.0101571	-0.594289	-0.668125	0.0914865	0.0491869	0.696087	-0.948292	0.0372702	9.83914e-05	-0.643041	-0.0597805	0.0617368	0.878578	-0.0179187	-0.761661	0.963506	0.0170826	0.320153	-0.948338	0.40096	9.80854e-05	0.10316	-0.711374	0.7917	0.0316319	0.0209223	-0.537079	0.957393	0.135945	0.0277798	0.240794	0.943444	0.532547	0.673354	-0.216194	0.0467959	0.576369	0.289871	-0.243884	0.449281
CL5789.Contig1_DB	1	turquoise	-0.866589	0.681415	0.00250028	0.0432581	-0.768524	0.681987	0.0155348	0.0430136	-0.840612	0.225005	0.00453772	0.560524	-0.0470527	0.688365	0.904322	0.0403499	-0.82228	0.258297	0.00651764	0.502185	-0.792912	0.251931	0.0107955	0.513147	0.212199	0.639855	0.583606	0.0634616	-0.281344	0.648814	0.463322	0.0586873	0.828781	0.209522	0.00575931	0.588474	-0.76467	0.0540899	0.016392	0.890077	-0.00621568	0.310192	0.987338	0.416582	0.201531	0.428167	0.603087
Unigene32258_DB	1	turquoise	-0.539563	0.889035	0.133794	0.00134241	-0.579414	0.808029	0.102033	0.00841192	-0.444694	0.611747	0.230401	0.0799963	-0.0643249	0.915991	0.869409	0.000520798	-0.446696	0.102148	0.228056	0.793707	-0.59302	0.714598	0.0923585	0.0305186	-0.0804342	0.910084	0.837022	0.00065672	0.195014	0.723325	0.615096	0.0276346	0.663427	0.520241	0.0514003	0.151061	-0.554659	-0.172759	0.121156	0.656694	-0.0480517	0.256145	0.902298	0.50588	-0.090119	0.305311	0.817649
CL14586.Contig4_DB	1	turquoise	-0.704121	-0.950866	0.034232	8.25004e-05	-0.531562	-0.927565	0.140795	0.000313597	-0.624467	-0.398776	0.0722171	0.28772	0.120066	-0.948504	0.758323	9.7005e-05	-0.629511	-0.346587	0.0692692	0.360852	-0.552569	-0.420345	0.122861	0.259956	0.101822	-0.90885	0.794353	0.000687961	0.101397	-0.900793	0.795198	0.000917881	0.606815	-0.417162	0.0831457	0.26396	-0.507789	-0.0514843	0.162841	0.895348	0.133427	-0.451486	0.732185	0.2225	0.0792853	-0.570669	0.839325
CL20420.Contig2_DB	1	turquoise	0.838114	0.931029	0.0047793	0.000265083	0.10484	0.847679	0.788368	0.00390004	0.804792	0.598955	0.00888881	0.0883219	-0.640797	0.958778	0.0629485	4.49741e-05	0.842518	0.178703	0.00435919	0.645499	0.164645	0.763918	0.672073	0.0165628	-0.407949	0.977364	0.275732	5.61976e-06	0.206178	0.762655	0.594574	0.0168524	-0.158307	0.462856	0.684159	0.209612	0.12594	-0.111515	0.746805	0.775164	-0.658026	0.352702	0.0540225	0.35186	-0.395906	0.341063	0.291525
CL20956.Contig1_DB	1	turquoise	0.907564	-0.627007	0.000721605	0.0707228	0.532049	-0.630749	0.140363	0.0685569	0.837721	-0.24482	0.00481809	0.5255	-0.286208	-0.637058	0.45529	0.0650006	0.851056	-0.219852	0.00361819	0.569771	0.573448	-0.104435	0.106461	0.78917	-0.260252	-0.593212	0.49884	0.0922266	0.0992321	-0.630857	0.799498	0.068495	-0.605003	-0.342111	0.0843223	0.367503	0.53006	-0.0640455	0.142133	0.869973	-0.301389	-0.26781	0.430612	0.485987	-0.24123	-0.38756	0.531781
CL23820.Contig1_DB	1	turquoise	-0.941006	0.85708	0.000154952	0.0031508	-0.318156	0.810609	0.404071	0.00804449	-0.890228	0.376262	0.00129413	0.318254	0.484757	0.882339	0.185982	0.00163678	-0.924802	0.304574	0.000356509	0.425512	-0.3542	0.552333	0.349673	0.123054	0.105938	0.901674	0.786194	0.00089046	-0.1566	0.756015	0.687425	0.0184306	0.396189	0.226852	0.291149	0.557223	-0.318972	0.0538455	0.402798	0.890571	0.537156	0.441397	0.135878	0.234291	0.0861458	0.413529	0.825587
CL496.Contig2_DB	1	turquoise	0.841072	0.89172	0.00449425	0.00123545	0.0840123	0.886023	0.829855	0.00146984	0.793655	0.26121	0.0106688	0.497202	-0.607917	0.863171	0.0824354	0.00272227	0.851805	0.471513	0.00355767	0.200082	0.116041	0.476383	0.766239	0.19483	0.116594	0.876504	0.765151	0.00192752	0.135691	0.845338	0.727778	0.00410395	-0.16924	0.193568	0.66335	0.617773	0.0930039	0.229655	0.811894	0.552228	-0.686554	0.610149	0.041095	0.0810086	0.125874	0.608784	0.746932
CL12633.Contig4_DB	1	turquoise	-0.650831	0.659981	0.057645	0.0530634	-0.925703	0.64939	0.000342096	0.0583884	-0.64337	0.0574609	0.0615601	0.883263	-0.389126	0.64885	0.300616	0.0586686	-0.590829	0.460375	0.0938772	0.212388	-0.940326	0.322599	0.000161181	0.397167	0.241068	0.665646	0.532065	0.0503469	-0.329926	0.621122	0.3859	0.074215	0.95932	-0.148905	4.2961e-05	0.702202	-0.921151	0.251563	0.000419322	0.513782	-0.369019	0.534792	0.328409	0.137943	0.23734	0.48519	0.53862
CL7563.Contig2_DB	1	turquoise	0.596935	0.768276	0.0896838	0.015589	0.602579	0.773782	0.0859116	0.0144143	0.689412	0.198601	0.0399229	0.608476	0.197563	0.75297	0.610391	0.0191858	0.629849	0.428304	0.0690743	0.250085	0.601624	0.364611	0.0865432	0.334665	-0.394908	0.776544	0.292854	0.013848	0.710551	0.744078	0.0319203	0.0215086	-0.566618	0.149139	0.111671	0.701752	0.608196	0.247014	0.0822566	0.521677	0.164497	0.554053	0.672355	0.121649	-0.37127	0.525787	0.325235
Unigene2334_DB	1	turquoise	0.601482	0.634655	0.0866372	0.0663412	0.854039	0.531708	0.00338124	0.140665	0.568428	0.495388	0.110275	0.175083	0.319669	0.671623	0.401712	0.0475786	0.524848	0.0687938	0.146832	0.860406	0.871984	0.723669	0.0021759	0.0275249	-0.274031	0.717643	0.475512	0.0294912	0.173434	0.452308	0.65542	0.221555	-0.893643	0.266036	0.0011626	0.488991	0.842848	-0.166694	0.00432878	0.66818	0.319764	0.215394	0.401566	0.577816	-0.263902	0.122173	0.492615
CL11306.Contig1_DB	1	turquoise	-0.954946	0.829803	6.11542e-05	0.00564588	-0.585202	0.892895	0.0978458	0.00119058	-0.953348	0.00493966	6.89768e-05	0.989937	0.180308	0.792149	0.642485	0.0109266	-0.952523	0.650023	7.32833e-05	0.0580611	-0.62682	0.085445	0.0708326	0.826989	0.207167	0.770251	0.592767	0.0151607	-0.508764	0.903508	0.1619	0.000835201	0.641629	0.0465701	0.0624973	0.905299	-0.607938	0.438232	0.0824223	0.238058	0.244648	0.717503	0.525802	0.0295379	0.206349	0.774181	0.594261
CL10050.Contig1_DB	1	turquoise	-0.815813	-0.691266	0.00733675	0.0391742	-0.533517	-0.75158	0.139065	0.0195374	-0.854941	0.0286709	0.00331174	0.941632	0.0514839	-0.619818	0.895349	0.0750028	-0.841609	-0.640621	0.00444372	0.0630442	-0.537418	-0.054856	0.13565	0.888528	0.028647	-0.623991	0.941681	0.0724994	-0.540506	-0.763098	0.132982	0.0167504	0.563858	-0.0363149	0.113819	0.926101	-0.537339	-0.493878	0.135719	0.176608	0.137732	-0.717244	0.723813	0.0296244	0.0148202	-0.721785	0.969814
Unigene1201_DB	1	turquoise	0.762734	-0.735685	0.0168341	0.0238647	0.714647	-0.682299	0.030502	0.0428807	0.792383	-0.37869	0.0108862	0.314886	0.0925237	-0.740972	0.812852	0.0223618	0.749839	-0.163051	0.0199838	0.675107	0.751865	-0.451066	0.019465	0.222985	-0.540688	-0.70756	0.132826	0.0329824	0.589799	-0.652932	0.0945956	0.0565715	-0.71459	-0.328004	0.0305215	0.388841	0.74086	0.0876001	0.0223929	0.82268	0.0890648	-0.248579	0.819754	0.518955	-0.539258	-0.356203	0.134057
CL28103.Contig1_DB	1	turquoise	0.739716	0.990752	0.022713	2.48188e-07	-0.0474101	0.970881	0.903598	1.3483e-05	0.691703	0.366732	0.0389994	0.331647	-0.658418	0.979967	0.0538289	3.67426e-06	0.755241	0.436727	0.0186205	0.239861	-0.0268261	0.498878	0.945383	0.171586	0.155477	0.977514	0.689577	5.49179e-06	0.030697	0.929118	0.937514	0.000291141	-0.0304208	0.320625	0.938075	0.400226	-0.0504198	0.158745	0.897503	0.683322	-0.730991	0.576723	0.0252536	0.104016	0.176468	0.611484	0.649701
Unigene41014_DB	1	turquoise	-0.817039	-0.86435	0.00717633	0.0026442	-0.792907	-0.917492	0.0107963	0.000489686	-0.794568	0.0169069	0.0105146	0.965566	-0.0834593	-0.816755	0.830962	0.0072133	-0.761163	-0.661234	0.0171989	0.0524548	-0.818727	-0.129551	0.00695945	0.739745	0.417162	-0.78476	0.26396	0.012252	-0.28321	-0.929102	0.460234	0.000291362	0.826419	0.0212044	0.00602751	0.956819	-0.787096	-0.425162	0.0118221	0.253957	-0.0824263	-0.721935	0.83303	0.0280815	0.39645	-0.806541	0.290802
CL19700.Contig1_DB	1	turquoise	0.775488	0.79191	0.0140628	0.0109678	0.266035	0.872768	0.488993	0.00213129	0.755493	-0.131914	0.0185585	0.735133	-0.421612	0.719562	0.258371	0.0288553	0.772214	0.745045	0.0147427	0.0212475	0.320074	-0.0673059	0.401083	0.863402	-0.513526	0.690602	0.15735	0.0394413	0.274167	0.910886	0.475285	0.000636961	-0.298582	-0.0591738	0.43513	0.879803	0.291906	0.567074	0.445957	0.111318	-0.418816	0.787715	0.261875	0.0117097	-0.507611	0.865968	0.163013
CL5927.Contig1_DB	1	turquoise	0.728602	0.857311	0.0259807	0.00313379	-0.117339	0.818585	0.763684	0.00697749	0.634311	0.378086	0.0665342	0.315723	-0.792996	0.852028	0.0107812	0.00353981	0.713283	0.333557	0.0309696	0.380374	-0.0726978	0.432343	0.852552	0.245154	0.0193496	0.850003	0.960594	0.00370451	-0.172469	0.791942	0.657242	0.0109624	0.0216437	0.347803	0.955925	0.359055	-0.114627	0.0840819	0.769025	0.829716	-0.829813	0.453536	0.00564474	0.220145	0.0327619	0.485908	0.933318
CL2183.Contig1_DB	1	turquoise	0.736723	0.671217	0.0235646	0.0477635	0.0796576	0.777524	0.838578	0.0136508	0.747443	-0.367961	0.020609	0.329904	-0.529136	0.596497	0.142959	0.0899803	0.774492	0.883944	0.0142674	0.00156253	0.133027	-0.126767	0.732965	0.745186	-0.387715	0.610208	0.302525	0.0809708	0.379618	0.817456	0.313603	0.00712236	-0.113483	-0.422704	0.771281	0.257008	0.112234	0.754585	0.773745	0.0187826	-0.563991	0.921632	0.113715	0.000410636	-0.387641	0.880152	0.302626
CL20096.Contig1_DB	1	turquoise	0.811913	0.613888	0.00786297	0.0786518	0.382862	0.471658	0.309141	0.199924	0.763478	0.815673	0.0166632	0.00735523	-0.302547	0.69319	0.428755	0.038407	0.789317	-0.27064	0.0114227	0.481211	0.412163	0.870085	0.270314	0.00228653	-0.051586	0.706747	0.895143	0.0332752	0.0852011	0.366855	0.827476	0.331473	-0.464429	0.694444	0.207861	0.0379122	0.381851	-0.528349	0.310528	0.143666	-0.357415	-0.111629	0.345004	0.77494	-0.0464625	-0.112555	0.905518
Unigene35012_DB	1	turquoise	0.91416	-0.846175	0.000560581	0.00403027	0.592215	-0.787807	0.0929146	0.0116931	0.856513	-0.53282	0.00319292	0.13968	-0.233011	-0.856728	0.546269	0.0031769	0.859482	-0.122643	0.00297662	0.753264	0.643427	-0.505251	0.0615295	0.165305	-0.395699	-0.818391	0.291801	0.0070023	0.172451	-0.747641	0.657276	0.0205566	-0.65857	-0.564281	0.0537546	0.113488	0.599363	0.137863	0.0880484	0.723557	-0.240039	-0.23647	0.533873	0.540155	-0.385787	-0.369245	0.305145
Unigene35022_DB	1	turquoise	-0.766547	0.504731	0.0159706	0.165812	-0.711559	0.625209	0.0315672	0.0717786	-0.712241	-0.348762	0.03133	0.35764	-0.000905972	0.401828	0.998154	0.283702	-0.692891	0.759084	0.0385258	0.0176895	-0.748607	-0.335447	0.0203034	0.377512	0.47167	0.363841	0.199912	0.335764	-0.0777425	0.718198	0.84242	0.0293062	0.759221	-0.158335	0.0176569	0.684106	-0.708276	0.64002	0.0327261	0.0633712	-0.0219841	0.747508	0.955232	0.0205918	0.463003	0.845685	0.209448
CL8390.Contig1_DB	1	turquoise	-0.840141	0.524144	0.00458264	0.147474	-0.161705	0.602686	0.677671	0.0858409	-0.818997	-0.187058	0.00692519	0.629866	0.522959	0.493064	0.148557	0.177433	-0.8559	0.600847	0.00323888	0.0870584	-0.198959	-0.113254	0.607818	0.771732	0.0126993	0.493338	0.974133	0.177155	-0.295891	0.622963	0.439481	0.0731115	0.229887	-0.187861	0.551815	0.628369	-0.172752	0.501485	0.656707	0.169	0.59761	0.627864	0.0892274	0.0702232	-0.00273782	0.611723	0.994423
CL16854.Contig1_DB	1	turquoise	0.827597	-0.874591	0.00589272	0.00203008	0.0606596	-0.935486	0.876804	0.000210753	0.73819	-0.0393248	0.0231444	0.919991	-0.72402	-0.817996	0.027413	0.00705282	0.796434	-0.649656	0.010204	0.0582506	0.118077	-0.0979184	0.762233	0.802109	-0.261617	-0.788534	0.496508	0.0115624	-0.070885	-0.952154	0.856198	7.52709e-05	-0.141098	-0.129869	0.717284	0.739124	0.0682097	-0.43663	0.861582	0.239977	-0.730151	-0.725454	0.0255077	0.0269593	-0.243729	-0.817315	0.527407
CL22348.Contig2_DB	1	turquoise	0.913493	0.596551	0.000575598	0.0899435	0.64232	0.474976	0.0621245	0.19634	0.867912	0.596653	0.00241784	0.0898747	-0.172765	0.638103	0.656683	0.0644224	0.862062	-0.0521491	0.00279705	0.894003	0.689194	0.799244	0.0400115	0.00974824	-0.44803	0.680814	0.226502	0.0435155	0.208489	0.38458	0.590355	0.306791	-0.699568	0.38954	0.0359332	0.300056	0.647935	-0.286964	0.0591452	0.454047	-0.176906	0.10328	0.648876	0.791461	-0.43701	0.0267228	0.239522
CL13634.Contig3_DB	1	turquoise	-0.58947	0.572729	0.0948263	0.107002	-0.408449	0.534948	0.275087	0.137807	-0.579902	0.469176	0.101676	0.20263	-0.0122182	0.576671	0.975112	0.104055	-0.594785	0.0481859	0.0911467	0.902026	-0.402411	0.274021	0.282938	0.475529	-0.501394	0.549879	0.16909	0.125077	-0.277436	0.519574	0.46982	0.151679	0.484089	0.628168	0.186679	0.0700463	-0.408132	-0.112899	0.275496	0.772434	0.10947	0.135795	0.779204	0.727577	-0.495224	0.235532	0.175248
Unigene38825_DB	1	turquoise	-0.588744	0.642328	0.095336	0.0621201	-0.986168	0.536905	1.01118e-06	0.136097	-0.627049	0.605518	0.0706983	0.0839871	-0.544555	0.674241	0.129532	0.0463978	-0.552215	0.014989	0.123152	0.96947	-0.986986	0.737307	8.17428e-07	0.0233967	0.311605	0.727486	0.414349	0.026325	-0.507121	0.455496	0.163488	0.217906	0.987914	0.472071	6.31604e-07	0.199477	-0.982	-0.197709	2.53148e-06	0.610122	-0.52215	0.186716	0.149301	0.630504	0.303499	0.0927012	0.427231
CL21433.Contig1_DB	1	turquoise	0.850816	0.838663	0.00363777	0.00472544	0.61513	0.738694	0.0778786	0.0230014	0.791678	0.684608	0.0110081	0.0419059	-0.141644	0.88978	0.716226	0.00131211	0.793489	-0.0162022	0.0106972	0.967	0.655672	0.768062	0.0551913	0.0156359	-0.224656	0.88113	0.561149	0.00169436	0.161216	0.640478	0.678604	0.063122	-0.688406	0.567994	0.0403331	0.110609	0.615008	-0.295045	0.0779547	0.440852	-0.166191	0.134714	0.669134	0.729679	-0.211455	0.183999	0.584958
CL10581.Contig3_DB	1	turquoise	0.849476	0.569621	0.00374827	0.109361	0.116161	0.615688	0.766003	0.0775328	0.774063	-0.0610404	0.0143561	0.876035	-0.630075	0.561358	0.0689439	0.115785	0.83066	0.470389	0.00555192	0.201305	0.152705	0.10882	0.694893	0.780491	0.0451854	0.558123	0.908106	0.118361	0.0191221	0.611981	0.961057	0.0798486	-0.203981	-0.130535	0.598594	0.737824	0.116058	0.319911	0.766206	0.401337	-0.681709	0.518344	0.0431324	0.152822	0.0660009	0.519912	0.866031
CL1884.Contig1_DB	1	turquoise	-0.661234	-0.63242	0.0524549	0.0676033	0.246712	-0.618492	0.522202	0.0758097	-0.631027	-0.138141	0.0683981	0.723018	0.80092	-0.632695	0.0094829	0.0674473	-0.702473	-0.403185	0.0348416	0.281925	0.202182	-0.460371	0.601893	0.212392	0.0114855	-0.679595	0.976605	0.0440412	-0.139582	-0.551783	0.720221	0.123506	-0.183975	0.0952756	0.635619	0.807368	0.222626	-0.218912	0.564786	0.571464	0.859319	-0.517666	0.00298824	0.153456	0.00669656	-0.397768	0.986358
CL12004.Contig1_DB	1	turquoise	0.895307	-0.372995	0.00110205	0.322814	0.351419	-0.337529	0.353737	0.374372	0.886259	-0.346258	0.00145953	0.361339	-0.36275	-0.389727	0.337325	0.299804	0.9037	0.0479264	0.000829576	0.902552	0.369335	-0.0919476	0.327962	0.814001	-0.0616312	-0.335997	0.874843	0.37668	0.343859	-0.365136	0.364898	0.333917	-0.401727	-0.526327	0.283834	0.145489	0.349995	0.190902	0.355827	0.622716	-0.429053	0.0242792	0.249167	0.950563	-0.0325317	-0.131269	0.933785
CL20435.Contig1_DB	1	turquoise	0.805461	0.581271	0.00878885	0.100678	0.477152	0.524706	0.194008	0.146962	0.854327	0.423912	0.00335892	0.255506	-0.0625406	0.616717	0.873008	0.0768977	0.849891	0.110082	0.00371379	0.777994	0.474348	0.593567	0.197015	0.091982	0.190742	0.662065	0.623013	0.0520536	0.626195	0.431713	0.0711988	0.245919	-0.517836	0.263992	0.153297	0.492463	0.481561	-0.0585086	0.189331	0.881147	-0.186438	0.251811	0.631021	0.513354	0.206854	0.150967	0.593338
Unigene4125_DB	1	turquoise	0.930626	0.828092	0.000270442	0.00583668	0.420184	0.770974	0.260157	0.0150058	0.890756	0.431567	0.00127313	0.246097	-0.38815	0.827862	0.301936	0.00586263	0.91083	0.293136	0.000638325	0.443953	0.471044	0.702995	0.200592	0.0346479	-0.361159	0.872597	0.339606	0.00214095	0.228424	0.688044	0.554419	0.0404815	-0.483383	0.261691	0.187417	0.496381	0.437884	0.0501816	0.238474	0.897985	-0.412375	0.466096	0.270043	0.206016	-0.358319	0.387428	0.343698
CL21615.Contig2_DB	1	turquoise	0.552844	0.261579	0.122636	0.496572	0.0845593	0.360481	0.82876	0.34058	0.550673	-0.422399	0.12442	0.257389	-0.433718	0.170959	0.243487	0.660097	0.560325	0.644687	0.116604	0.0608576	0.151893	-0.101986	0.696454	0.794027	-0.653816	0.203759	0.0561237	0.599	0.27761	0.377134	0.469531	0.317042	-0.0906134	-0.490633	0.816662	0.179912	0.126786	0.62336	0.745148	0.0728745	-0.401384	0.668416	0.284285	0.0490518	-0.665683	0.585687	0.0503294
CL24607.Contig1_DB	1	turquoise	0.819954	-0.899385	0.00680465	0.00096292	0.168598	-0.83376	0.664568	0.00522092	0.820856	-0.601691	0.00669237	0.0864985	-0.450979	-0.924278	0.223085	0.000365089	0.856067	-0.148682	0.00322628	0.702632	0.18168	-0.562559	0.639915	0.114838	0.100724	-0.906144	0.796534	0.00076006	0.337362	-0.786079	0.374623	0.012008	-0.223382	-0.623519	0.56343	0.0727799	0.174254	0.132582	0.653872	0.733831	-0.541643	-0.286671	0.132008	0.454528	0.11857	-0.365207	0.761263
CL2286.Contig1_DB	1	turquoise	-0.599659	0.874158	0.0878504	0.0020538	0.0291627	0.796574	0.940632	0.010181	-0.541781	0.550694	0.13189	0.124403	0.53592	0.885069	0.136955	0.00151188	-0.605012	0.177351	0.0843166	0.648039	-0.00174023	0.717297	0.996455	0.0296068	-0.177377	0.893749	0.647991	0.00115868	-0.033554	0.714771	0.931709	0.0304597	0.0498974	0.4276	0.898561	0.250949	0.0140328	-0.0979653	0.971417	0.802016	0.597188	0.334958	0.0895121	0.378252	-0.176297	0.346525	0.650023
CL9244.Contig1_DB	1	turquoise	0.763953	0.717991	0.0165548	0.0293751	0.336505	0.589039	0.375915	0.0951289	0.672299	0.753799	0.047272	0.0189783	-0.380129	0.775972	0.312899	0.0139642	0.707793	-0.121955	0.0328989	0.754613	0.386595	0.921462	0.304046	0.000413704	-0.13732	0.813389	0.724612	0.00766083	-0.0608622	0.46634	0.876395	0.205747	-0.430788	0.569853	0.247046	0.109185	0.339069	-0.366454	0.372056	0.332042	-0.401447	0.0657101	0.284202	0.866617	-0.131525	0.0116099	0.735892
Unigene36134_DB	1	turquoise	-0.481619	0.916711	0.189271	0.000505703	-0.277986	0.954456	0.468904	6.34806e-05	-0.395722	0.0739266	0.29177	0.850082	0.22661	0.870534	0.557655	0.00226003	-0.409518	0.654707	0.273709	0.055675	-0.316562	0.257911	0.406561	0.502848	0.132566	0.861046	0.733863	0.00286685	0.112366	0.94073	0.773484	0.00015746	0.341138	0.0360565	0.368956	0.926626	-0.26715	0.413083	0.487104	0.269138	0.216285	0.750908	0.576205	0.0197089	0.110069	0.785148	0.778022
CL12440.Contig1_DB	1	turquoise	0.757636	0.762632	0.0180365	0.0168577	0.500211	0.690153	0.170262	0.0396227	0.8408	0.557463	0.00451996	0.11889	0.0189074	0.772244	0.961494	0.0147362	0.82027	0.115828	0.00676513	0.76666	0.496099	0.710781	0.174367	0.0318394	0.0105788	0.7875	0.978451	0.0117486	0.743756	0.605985	0.0215959	0.0836833	-0.512945	0.473268	0.157901	0.19818	0.512227	-0.134314	0.158584	0.730457	-0.0914947	0.274557	0.814904	0.474632	0.0222795	0.271558	0.954631
CL19391.Contig1_DB	1	turquoise	0.837904	-0.66581	0.00479997	0.0502697	0.141726	-0.719764	0.716067	0.0287889	0.829337	0.234115	0.00569746	0.544315	-0.538994	-0.605864	0.134285	0.0837619	0.862914	-0.751481	0.00273944	0.0195626	0.17835	-0.14177	0.646163	0.715982	-0.152132	-0.641407	0.695994	0.0626176	0.335905	-0.719126	0.376819	0.0289989	-0.187069	0.426776	0.629845	0.251964	0.16198	-0.593273	0.677148	0.0921846	-0.59177	-0.820772	0.0932228	0.0067027	-0.142186	-0.729902	0.715177
CL1847.Contig1_DB	1	turquoise	-0.770003	0.865235	0.015214	0.00258666	-0.491301	0.778925	0.179229	0.013372	-0.691741	0.628955	0.0389842	0.0695905	0.256345	0.895256	0.505537	0.00110386	-0.69705	0.112033	0.0368972	0.774142	-0.541097	0.772791	0.132476	0.0146213	0.472798	0.910139	0.198688	0.000655357	0.0530468	0.682897	0.892187	0.0426268	0.551827	0.50552	0.12347	0.165043	-0.489447	-0.16651	0.181128	0.668529	0.228142	0.281598	0.554922	0.462901	0.461882	0.274724	0.210699
CL5172.Contig1_DB	1	turquoise	-0.473827	0.735135	0.197577	0.0240248	-0.107863	0.616445	0.782382	0.0770652	-0.464522	0.8141	0.207758	0.00756474	0.225609	0.795594	0.559444	0.010343	-0.491307	-0.18228	0.179223	0.63879	-0.0892132	0.713768	0.819457	0.0308029	-0.295695	0.782083	0.439798	0.0127577	-0.0554399	0.534357	0.887348	0.138326	0.151099	0.817548	0.69798	0.00711044	-0.0905295	-0.431963	0.81683	0.245616	0.299581	-0.0339623	0.43352	0.930879	-0.313161	0.0389242	0.411897
CL18525.Contig1_DB	1	turquoise	0.814226	0.786609	0.00754791	0.0119108	0.301746	0.718146	0.43004	0.0293236	0.753694	0.655481	0.0190044	0.0552866	-0.38013	0.816044	0.312897	0.00730628	0.796052	-0.00042213	0.0102671	0.99914	0.333965	0.499698	0.379756	0.170771	0.100546	0.769749	0.796886	0.0152688	0.0776256	0.674349	0.842654	0.0463495	-0.396822	0.762614	0.290307	0.0168617	0.308308	-0.26275	0.419568	0.494576	-0.450766	0.11164	0.223331	0.774918	0.0983459	0.258672	0.801259
CL9973.Contig1_DB	1	turquoise	-0.830453	0.953126	0.00557454	7.01219e-05	-0.676638	0.94156	0.0453328	0.000150001	-0.78576	0.356006	0.0120667	0.347048	0.0185762	0.936226	0.962168	0.000202562	-0.781971	0.436385	0.0127791	0.240271	-0.698608	0.479682	0.0362989	0.191317	0.0496387	0.930496	0.899084	0.00027218	-0.185233	0.898369	0.633269	0.00099635	0.748728	0.335245	0.020272	0.377817	-0.672663	0.162174	0.0471073	0.676777	0.0667673	0.571746	0.864487	0.107745	0.0442304	0.611045	0.910041
CL18893.Contig5_DB	1	turquoise	-0.781862	0.480419	0.0128001	0.190536	-0.534038	0.388788	0.138606	0.301072	-0.837285	0.479662	0.00486131	0.191338	0.00586769	0.525903	0.988047	0.145873	-0.822628	-0.143029	0.00647537	0.713545	-0.556537	0.650967	0.119636	0.057575	0.0273888	0.526473	0.944239	0.145357	-0.740543	0.296815	0.0224813	0.437984	0.562696	0.301922	0.11473	0.429757	-0.566679	-0.316264	0.111623	0.407027	0.103227	-0.037451	0.791567	0.923795	0.0369635	-0.0154593	0.924784
CL24100.Contig1_DB	1	turquoise	0.834882	0.745591	0.00510458	0.021101	0.285513	0.754555	0.456434	0.0187901	0.848406	0.0598177	0.00383811	0.878503	-0.353732	0.703889	0.350356	0.0343175	0.863279	0.54015	0.00271503	0.133289	0.297664	0.408602	0.436612	0.274889	-0.0480068	0.739967	0.902389	0.0226424	0.386507	0.709344	0.304166	0.032346	-0.328198	-0.117459	0.388544	0.763448	0.282329	0.356775	0.461692	0.345931	-0.431725	0.659673	0.245905	0.0532139	-0.0177738	0.589419	0.963801
CL17932.Contig1_DB	1	turquoise	-0.836613	-0.630861	0.00492852	0.0684928	-0.789196	-0.535863	0.0114441	0.137006	-0.818499	-0.552924	0.00698856	0.122571	-0.123926	-0.693547	0.750748	0.038266	-0.798885	0.0768366	0.00980561	0.844238	-0.803899	-0.499971	0.00902355	0.170499	0.0226398	-0.671357	0.953898	0.0477001	-0.345993	-0.487108	0.361732	0.18354	0.851876	-0.47913	0.003552	0.191902	-0.785764	0.30197	0.0120661	0.429681	-0.0591206	-0.0120159	0.879911	0.975524	0.0149474	-0.0820533	0.969555
CL15463.Contig3_DB	1	turquoise	0.470284	0.574351	0.20142	0.105784	-0.10048	0.524347	0.797018	0.147289	0.487319	0.323674	0.183321	0.395504	-0.375899	0.569829	0.31876	0.109203	0.537869	0.173039	0.135259	0.656165	-0.104242	0.562372	0.789554	0.114985	0.511249	0.586489	0.159517	0.0969289	0.281015	0.459836	0.463868	0.212993	0.0395068	0.183128	0.919622	0.637203	-0.0910956	-0.0372315	0.8157	0.92424	-0.508839	0.28604	0.161829	0.455566	0.510001	0.262613	0.160711
CL26960.Contig1_DB	1	turquoise	0.933864	0.555013	0.000229519	0.120868	0.26379	0.468585	0.492806	0.203277	0.893452	0.543894	0.0011697	0.130091	-0.542591	0.566905	0.1312	0.111449	0.927399	0.0142088	0.000316064	0.971059	0.308437	0.675921	0.419363	0.0456498	-0.286608	0.624573	0.454631	0.0721547	0.203454	0.381332	0.59956	0.311242	-0.32413	0.443704	0.394799	0.231565	0.27638	-0.137927	0.471582	0.723433	-0.572744	0.183738	0.106991	0.636063	-0.271581	0.0846672	0.479626
CL28508.Contig3_DB	1	turquoise	-0.718312	0.771556	0.0292684	0.0148818	-0.659455	0.673937	0.0533205	0.0465337	-0.68403	0.750111	0.0421485	0.0199136	-0.092167	0.826271	0.813563	0.0060446	-0.679495	-0.127225	0.0440844	0.74429	-0.66779	0.673712	0.0493427	0.0466348	-0.156462	0.797251	0.687689	0.01007	-0.187031	0.59215	0.629916	0.0929597	0.735636	0.759492	0.0238791	0.0175924	-0.652013	-0.380931	0.0570396	0.311793	-0.0183628	0.0095987	0.962602	0.980447	-0.156272	0.11708	0.688054
CL11918.Contig1_DB	1	turquoise	0.964731	0.548754	2.62072e-05	0.12601	0.425255	0.53566	0.253843	0.137183	0.963556	0.0176473	2.93597e-05	0.964059	-0.350708	0.546297	0.354781	0.128065	0.975006	0.402016	7.93135e-06	0.283455	0.455825	0.251795	0.217531	0.513382	-0.221723	0.564811	0.566407	0.113074	0.427571	0.518496	0.250985	0.152681	-0.472065	-0.189749	0.199483	0.624857	0.435824	0.224852	0.240946	0.560799	-0.408384	0.458091	0.27517	0.214961	-0.202123	0.400961	0.602
CL27804.Contig1_DB	1	turquoise	-0.649045	0.597102	0.0585674	0.0895708	-0.923873	0.58375	0.000371812	0.0988863	-0.677975	0.125823	0.0447458	0.747034	-0.398295	0.585788	0.288356	0.0974274	-0.610716	0.357855	0.0806484	0.344368	-0.949584	0.479549	9.01635e-05	0.191458	0.500663	0.625383	0.169814	0.0716763	-0.508884	0.514792	0.161785	0.156153	0.928383	-0.098944	0.000301621	0.80007	-0.935679	0.190397	0.000208593	0.623654	-0.395692	0.470472	0.291809	0.201215	0.503764	0.380222	0.166759
CL2262.Contig3_DB	1	turquoise	0.829097	0.47976	0.00572409	0.191234	0.633559	0.516053	0.0669581	0.154966	0.812902	0.211637	0.0077272	0.584627	-0.0935059	0.459834	0.810894	0.212996	0.791145	0.208302	0.0111008	0.590696	0.667654	-0.0275231	0.0494061	0.943966	-0.553526	0.406156	0.122078	0.278055	0.245616	0.546003	0.524112	0.128311	-0.66146	0.491041	0.0523457	0.179494	0.633879	0.0786437	0.0667777	0.840612	-0.0840482	0.243977	0.829783	0.526974	-0.536967	0.397722	0.136042
CL27636.Contig1_DB	1	turquoise	0.66249	0.805713	0.0518494	0.00875132	0.127588	0.682624	0.74358	0.0427429	0.699108	0.733607	0.0361081	0.0244733	-0.406706	0.874045	0.277341	0.00206001	0.708215	-0.071075	0.032748	0.855815	0.179855	0.8566	0.643336	0.00318642	-0.499482	0.887129	0.170985	0.00142211	0.477656	0.570688	0.19347	0.108548	-0.139211	0.549042	0.720942	0.125771	0.16572	-0.350992	0.67003	0.354363	-0.43063	0.0942901	0.247239	0.809331	-0.504088	0.0869113	0.166441
CL17168.Contig1_DB	1	turquoise	0.697315	0.727732	0.0367949	0.0262488	0.365201	0.770326	0.333825	0.0151444	0.790153	-0.110054	0.0112746	0.778051	-0.102431	0.689698	0.793145	0.0398069	0.76993	0.673773	0.0152296	0.0466077	0.38584	0.137596	0.305072	0.724076	-0.321963	0.714851	0.398151	0.0304323	0.780937	0.779926	0.0129784	0.0131752	-0.355817	-0.228929	0.347322	0.553521	0.397358	0.502251	0.289596	0.168245	-0.171456	0.750743	0.659157	0.019751	-0.319222	0.69446	0.402408
CL3490.Contig1_DB	1	turquoise	-0.770043	0.573236	0.0152054	0.106621	-0.302458	0.44001	0.428897	0.235938	-0.674042	0.65984	0.0464868	0.0531323	0.400085	0.633109	0.285993	0.0672125	-0.714833	-0.153378	0.0304385	0.693602	-0.336648	0.896431	0.375699	0.00106238	-0.0689607	0.679969	0.86007	0.0438794	0.115605	0.323392	0.767099	0.39594	0.403401	0.413582	0.281643	0.268502	-0.292277	-0.377365	0.445352	0.316722	0.441618	0.0142816	0.23403	0.970911	-0.0821386	-0.0710234	0.833607
CL10587.Contig2_DB	1	turquoise	0.899894	0.777271	0.000946456	0.0137015	0.749776	0.663093	0.0199999	0.05156	0.88907	0.801596	0.00134096	0.00937737	-0.0135024	0.842717	0.972497	0.00434089	0.864162	-0.167795	0.00265655	0.66609	0.786163	0.703795	0.0119925	0.0343521	-0.472567	0.81341	0.198939	0.00765798	0.365252	0.588364	0.333751	0.0956033	-0.788305	0.808415	0.0116035	0.00835631	0.756988	-0.445086	0.0181932	0.229942	-0.0271421	-0.0302016	0.944741	0.938521	-0.46258	0.0786015	0.20992
CL15175.Contig1_DB	1	turquoise	-0.296242	-0.757571	0.438911	0.0180521	0.468265	-0.707413	0.203628	0.0330353	-0.246157	-0.48264	0.523168	0.188197	0.694666	-0.75405	0.0378252	0.0189155	-0.337498	-0.160819	0.374418	0.679361	0.448719	-0.578574	0.225701	0.102649	-0.492747	-0.757108	0.177756	0.0181641	0.105639	-0.634613	0.786785	0.0663644	-0.388705	-0.446786	0.301185	0.227952	0.45208	0.0500211	0.221817	0.89831	0.780791	-0.302594	0.0130068	0.42868	-0.481257	-0.331343	0.189652
CL128.Contig1_DB	1	turquoise	0.891632	-0.555126	0.00123887	0.120777	0.376858	-0.520515	0.317425	0.150808	0.843218	-0.19677	0.00429488	0.611852	-0.392455	-0.572086	0.296134	0.107488	0.865944	-0.250558	0.00254118	0.515523	0.415577	-0.516558	0.265966	0.154492	-0.12866	-0.604624	0.741485	0.0845692	0.228858	-0.447262	0.553647	0.227397	-0.441865	0.051174	0.233736	0.895977	0.383727	-0.0596607	0.307956	0.87882	-0.43149	-0.352714	0.24619	0.351843	-0.110103	-0.268524	0.777953
CL8353.Contig1_DB	1	turquoise	0.892532	-0.595135	0.00120434	0.0909078	0.215027	-0.6067	0.57848	0.0832203	0.853583	-0.190247	0.00341672	0.623932	-0.540177	-0.58469	0.133265	0.0982115	0.893692	-0.30193	0.00116081	0.429744	0.265572	-0.0812909	0.489779	0.835305	-0.0986761	-0.556912	0.800603	0.119334	0.296247	-0.639819	0.438904	0.0634811	-0.287507	-0.331179	0.453156	0.38399	0.236987	-0.126113	0.539242	0.746466	-0.597941	-0.356609	0.0890037	0.346172	-0.0904408	-0.446793	0.817007
Unigene3065_DB	1	turquoise	-0.694342	-0.878587	0.0379525	0.00181993	-0.56998	-0.906287	0.109087	0.000756115	-0.658981	-0.217382	0.0535527	0.574223	0.0037117	-0.830723	0.992439	0.00554501	-0.654992	-0.518306	0.0555319	0.152858	-0.570516	-0.235978	0.108679	0.541022	0.0412648	-0.801306	0.916055	0.00942261	-0.0576759	-0.906183	0.882829	0.000758979	0.626099	-0.327812	0.071255	0.389135	-0.548845	-0.276471	0.125935	0.47143	0.0421763	-0.614743	0.914206	0.0781191	0.0232373	-0.713258	0.952683
CL10490.Contig7_DB	1	turquoise	-0.419487	0.934733	0.261031	0.00021932	-0.136716	0.87067	0.725786	0.00225202	-0.303103	0.540129	0.427865	0.133306	0.275408	0.943663	0.473208	0.000132217	-0.354852	0.260508	0.348725	0.498401	-0.152009	0.700464	0.696231	0.0355944	-0.338697	0.964775	0.372614	2.60945e-05	0.367659	0.797282	0.330332	0.0100649	0.235307	0.444778	0.542208	0.230302	-0.125265	-0.0192959	0.748126	0.960703	0.306719	0.434215	0.422092	0.242885	-0.331989	0.419285	0.382756
CL2458.Contig1_DB	1	turquoise	0.839586	0.550849	0.00463589	0.124275	0.438558	0.614829	0.237669	0.078066	0.864798	-0.255562	0.002615	0.506883	-0.250795	0.472907	0.515112	0.198571	0.855712	0.718543	0.00325305	0.0291917	0.490838	0.138413	0.179702	0.72249	-0.545682	0.523461	0.128581	0.148098	0.576313	0.609825	0.10432	0.0812147	-0.451191	-0.408419	0.22284	0.275125	0.47632	0.608335	0.194898	0.082167	-0.26697	0.79807	0.487409	0.00993701	-0.546364	0.681326	0.128008
CL359.Contig1_DB	1	turquoise	0.940946	0.646771	0.000155496	0.0597556	0.285837	0.568781	0.455901	0.110004	0.90239	0.623591	0.000868582	0.072737	-0.49713	0.670354	0.173332	0.0481583	0.940705	-0.0160698	0.000157684	0.96727	0.329905	0.647486	0.385933	0.0593804	-0.0540535	0.673575	0.890151	0.0466966	0.285181	0.502096	0.456982	0.168398	-0.366111	0.635555	0.33253	0.0658369	0.30124	-0.257345	0.430852	0.503818	-0.566989	0.127054	0.111384	0.744623	-0.0442414	0.154489	0.910019
Unigene813_DB	1	turquoise	0.635166	0.965812	0.0660545	2.3527e-05	0.682771	0.978427	0.0426804	4.75419e-06	0.629532	0.22139	0.0692571	0.567006	0.210144	0.942568	0.587341	0.000141277	0.609939	0.546552	0.0811418	0.127851	0.671314	0.362909	0.0477196	0.337096	0.0919228	0.93199	0.81405	0.000252616	0.218222	0.952303	0.572708	7.44628e-05	-0.732399	0.18862	0.0248316	0.626957	0.66494	0.283202	0.0506808	0.460247	0.143828	0.6615	0.712001	0.0523263	0.102859	0.705222	0.792297
CL3177.Contig1_DB	1	turquoise	0.729664	0.34759	0.0256558	0.359369	0.18789	0.259447	0.628316	0.500216	0.705406	0.502107	0.0337616	0.168387	-0.464802	0.406142	0.207447	0.278073	0.728203	-0.204283	0.0261035	0.598041	0.255393	0.623939	0.507175	0.0725306	-0.446052	0.428796	0.228809	0.249481	0.264186	0.14524	0.492132	0.709272	-0.232902	0.329461	0.546463	0.386611	0.22483	-0.323219	0.560837	0.396207	-0.472189	-0.0935186	0.199348	0.810868	-0.458232	-0.140003	0.214802
CL12798.Contig1_DB	1	turquoise	0.66106	0.780044	0.0525393	0.0131522	0.575077	0.82486	0.105241	0.00620904	0.750445	-0.0208233	0.0198275	0.957595	0.134302	0.733113	0.730481	0.0246194	0.705024	0.628781	0.0339011	0.0696908	0.591754	0.175384	0.0932339	0.651743	-0.226663	0.730787	0.557562	0.0253151	0.83254	0.808292	0.00534955	0.00837391	-0.567882	-0.0921829	0.110695	0.813531	0.597946	0.445501	0.0890009	0.229455	0.0610658	0.705129	0.875984	0.0338627	-0.218494	0.713405	0.572218
CL24863.Contig1_DB	1	turquoise	0.843312	-0.545302	0.00428624	0.128902	0.550672	-0.479801	0.124422	0.191191	0.896562	-0.627652	0.00105783	0.0703467	-0.106824	-0.569858	0.784439	0.10918	0.868397	0.1549	0.00238807	0.690682	0.585645	-0.419611	0.0975294	0.260876	-0.544497	-0.514804	0.129581	0.156141	0.626036	-0.435742	0.071292	0.241045	-0.555891	-0.786161	0.120157	0.0119929	0.57184	0.353451	0.107674	0.350766	-0.139346	0.0709205	0.720679	0.856126	-0.534113	-0.0960212	0.13854
Unigene4451_DB	1	turquoise	0.918954	0.775643	0.000460652	0.0140312	0.675281	0.827715	0.0459337	0.0058793	0.947078	-0.0501304	0.000106589	0.898089	-0.0514465	0.704084	0.895425	0.0342456	0.921953	0.71001	0.000404906	0.0321105	0.710423	0.194989	0.031965	0.615143	-0.42007	0.714773	0.260301	0.0304591	0.585543	0.825895	0.0976024	0.00608813	-0.699371	-0.0918767	0.0360082	0.814142	0.697219	0.504484	0.0368319	0.166054	-0.0913813	0.798832	0.81513	0.00981418	-0.417321	0.782435	0.263759
CL20670.Contig2_DB	1	turquoise	0.887841	0.445104	0.00139194	0.229921	0.581242	0.449833	0.100699	0.22441	0.873394	-0.0131134	0.00209615	0.973289	-0.19362	0.412822	0.617676	0.269473	0.862688	0.402636	0.00275467	0.282643	0.639322	0.383487	0.063753	0.308285	-0.572131	0.474633	0.107454	0.196709	0.379433	0.390712	0.31386	0.298476	-0.619896	-0.243401	0.0749559	0.52798	0.606704	0.29859	0.0832175	0.435118	-0.196246	0.5065	0.612821	0.16409	-0.573694	0.36176	0.106276
Unigene2940_DB	1	turquoise	-0.861206	0.784976	0.00285579	0.012212	-0.817454	0.658643	0.00712266	0.0537183	-0.890881	0.832588	0.00126822	0.00534447	-0.155533	0.856998	0.68947	0.00315688	-0.850842	-0.180879	0.00363568	0.641416	-0.831162	0.79956	0.00549738	0.00969773	0.301262	0.849064	0.430816	0.00378272	-0.55012	0.562395	0.124877	0.114967	0.838711	0.774847	0.00472073	0.0141941	-0.822881	-0.450671	0.00644487	0.223441	-0.109728	-0.0212178	0.778694	0.956792	0.290203	0.0360509	0.448738
CL14549.Contig2_DB	1	turquoise	0.96957	0.70056	1.57093e-05	0.035558	0.442569	0.708089	0.232904	0.0327929	0.914564	0.0539059	0.00055162	0.890449	-0.398664	0.703787	0.287868	0.0343552	0.939764	0.468109	0.000166466	0.2038	0.489753	0.218754	0.180813	0.571748	-0.204438	0.704698	0.597757	0.0340203	0.20923	0.703881	0.589004	0.0343205	-0.520784	-0.0697017	0.150559	0.858579	0.452755	0.258379	0.221041	0.502045	-0.439026	0.532344	0.23711	0.140101	-0.193378	0.525182	0.618124
CL13410.Contig1_DB	1	turquoise	0.760395	0.922103	0.017379	0.00040226	0.347469	0.840518	0.359548	0.00454667	0.838713	0.606675	0.00472062	0.0832368	-0.171738	0.952	0.658624	7.61068e-05	0.826003	0.160338	0.00607559	0.680279	0.355091	0.762412	0.348377	0.0169086	-0.179714	0.966191	0.643601	2.26355e-05	0.697996	0.753406	0.0365329	0.0190764	-0.347573	0.48045	0.359395	0.190504	0.362483	-0.129063	0.337706	0.740697	-0.252288	0.332006	0.512529	0.382729	-0.160289	0.330398	0.680373
CL3342.Contig1_DB	1	turquoise	0.610418	0.601249	0.0808372	0.0867915	0.606695	0.726043	0.0832235	0.0267744	0.671685	-0.353291	0.0475509	0.350999	0.132604	0.492697	0.733789	0.177807	0.622692	0.84671	0.0732729	0.00398359	0.645663	-0.230588	0.0603398	0.550569	-0.565078	0.470182	0.112866	0.201531	0.698275	0.79266	0.0364263	0.0108387	-0.590981	-0.232	0.0937708	0.548062	0.639693	0.71195	0.06355	0.0314309	0.122667	0.861198	0.753217	0.00285635	-0.565605	0.919274	0.112456
CL13845.Contig2_DB	1	turquoise	0.875178	0.447109	0.00199818	0.227575	0.737497	0.464219	0.0233422	0.208095	0.904568	0.133742	0.000804397	0.731571	0.0983863	0.430641	0.801179	0.247225	0.881982	0.193559	0.00165364	0.617789	0.751395	0.132325	0.0195845	0.734333	-0.0259647	0.373894	0.947135	0.321557	0.594863	0.460737	0.0910937	0.211981	-0.785348	0.21299	0.012143	0.58217	0.74757	0.0251902	0.0205754	0.94871	0.00431397	0.21449	0.991212	0.579452	-0.0231209	0.357246	0.952919
CL17735.Contig2_DB	1	turquoise	0.917661	0.713586	0.000486265	0.0308652	0.544393	0.639611	0.129669	0.0635945	0.879867	0.602261	0.00175593	0.0861216	-0.252164	0.757012	0.512743	0.0181875	0.885727	-0.0276602	0.00148276	0.943687	0.597435	0.646605	0.0893455	0.0598425	-0.320308	0.739828	0.400719	0.0226814	0.324157	0.552308	0.394759	0.123075	-0.607214	0.548402	0.0828886	0.126304	0.563275	-0.267906	0.114275	0.485825	-0.280612	0.100216	0.464537	0.797543	-0.315696	0.165712	0.407916
CL22917.Contig1_DB	1	turquoise	0.809797	0.704998	0.0081589	0.0339106	0.010565	0.657054	0.978479	0.0545029	0.768928	0.537996	0.0154467	0.135149	-0.647027	0.734885	0.0596209	0.0240977	0.830423	0.0479213	0.00557784	0.902562	0.039406	0.36261	0.919827	0.337524	0.15268	0.685919	0.694941	0.0413586	0.150414	0.62502	0.699297	0.0718905	-0.0913743	0.643377	0.815144	0.0615566	0.0188004	-0.187357	0.961711	0.629308	-0.730299	0.131359	0.0254629	0.736216	0.165777	0.268498	0.669921
CL5769.Contig2_DB	1	turquoise	-0.511936	-0.251614	0.158861	0.513695	-0.355305	-0.252842	0.348066	0.511571	-0.527406	0.148857	0.144515	0.702295	0.140426	-0.239231	0.718585	0.535292	-0.496552	-0.300441	0.173912	0.432135	-0.402998	-0.199373	0.282169	0.607056	0.921753	-0.267087	0.000408472	0.48721	-0.254827	-0.233325	0.508148	0.545713	0.330726	0.397903	0.38468	0.288875	-0.371996	-0.205532	0.324216	0.595755	0.0699185	-0.328618	0.858142	0.387901	0.909455	-0.248448	0.000672506
CL3691.Contig1_DB	1	turquoise	-0.541328	0.775354	0.132278	0.0140902	-0.537071	0.759716	0.135952	0.0175392	-0.511599	0.416346	0.159182	0.264991	-0.0871154	0.764402	0.823649	0.0164527	-0.496495	0.209971	0.17397	0.587655	-0.533914	0.269546	0.138715	0.483055	-0.00510621	0.703124	0.989598	0.0346001	-0.0328981	0.751846	0.933041	0.0194698	0.584059	0.576492	0.0986644	0.104187	-0.510996	-0.0287492	0.159758	0.941473	-0.0541395	0.285793	0.889977	0.455974	-0.0240461	0.463773	0.951037
CL13009.Contig2_DB	1	turquoise	0.85765	0.492543	0.00310889	0.177963	0.354991	0.509619	0.348522	0.161078	0.767993	0.115619	0.0156511	0.767071	-0.459419	0.479678	0.213463	0.191321	0.798358	0.337925	0.00989038	0.373774	0.413651	0.0886484	0.268414	0.820585	-0.329699	0.475062	0.386247	0.196247	-0.0290947	0.538286	0.940771	0.134897	-0.436857	0.20497	0.239705	0.596783	0.360565	0.171299	0.340459	0.659454	-0.458136	0.392271	0.214911	0.296382	-0.319753	0.413282	0.401583
Unigene37581_DB	1	turquoise	0.808415	0.924126	0.00835626	0.000367608	0.0254854	0.946198	0.94811	0.000112821	0.736113	0.173523	0.0237405	0.655252	-0.676672	0.89211	0.0453179	0.00122042	0.803891	0.565708	0.00902479	0.112376	0.07026	0.304713	0.857455	0.425291	0.0904701	0.881562	0.816948	0.00167364	0.0299415	0.922254	0.939049	0.000399585	-0.12377	0.150675	0.751055	0.698795	0.0363288	0.326299	0.926073	0.391459	-0.742711	0.671765	0.0218814	0.0475144	0.0974258	0.712701	0.803089
Unigene18653_DB	1	turquoise	0.71383	0.519617	0.0307816	0.151639	0.450941	0.52853	0.223129	0.143503	0.759595	-0.0163124	0.017568	0.966776	-0.0929506	0.520559	0.812001	0.150767	0.73706	0.405937	0.0234677	0.278339	0.467816	0.149188	0.204122	0.701657	-0.383805	0.514693	0.307849	0.156246	0.528437	0.531773	0.143587	0.140608	-0.442873	-0.143162	0.232545	0.713289	0.468018	0.213701	0.2039	0.580882	-0.116737	0.436743	0.764869	0.239842	-0.373693	0.43219	0.321838
CL4242.Contig3_DB	1	turquoise	0.902228	0.785654	0.000873515	0.0120863	0.17714	0.820755	0.648437	0.00670486	0.873879	-0.0292111	0.0020692	0.940534	-0.566682	0.730954	0.111621	0.0252649	0.91708	0.666141	0.000498082	0.0501142	0.2173	0.281595	0.57437	0.462906	-0.101176	0.749112	0.795635	0.0201721	0.252408	0.798323	0.512322	0.00989612	-0.246713	-0.161184	0.5222	0.678665	0.193259	0.458737	0.618345	0.214231	-0.630432	0.761281	0.0687392	0.0171712	-0.0930837	0.722344	0.811735
CL19264.Contig2_DB	1	turquoise	0.720392	0.692577	0.0285829	0.0386503	0.487299	0.634743	0.183342	0.0662919	0.808451	0.424876	0.00835103	0.254312	0.0100514	0.705085	0.979525	0.0338787	0.781447	0.189631	0.0128799	0.625077	0.497677	0.439211	0.172785	0.236889	-0.231968	0.708073	0.548119	0.0327989	0.741802	0.60196	0.0221315	0.0863204	-0.4892	0.388248	0.181382	0.301803	0.50689	-0.0419266	0.163712	0.914713	-0.0723005	0.297337	0.853351	0.43714	-0.224928	0.307093	0.560661
CL9526.Contig4_DB	1	turquoise	0.928665	0.834139	0.000297574	0.00518141	0.534861	0.753793	0.137883	0.0189798	0.867102	0.683429	0.00246806	0.0424017	-0.300777	0.867966	0.431595	0.00241453	0.878088	0.0266474	0.0018453	0.945747	0.585767	0.647234	0.0974422	0.0595123	-0.344288	0.856213	0.36426	0.00321534	0.17295	0.692813	0.656334	0.0385567	-0.602525	0.713975	0.0859471	0.0307317	0.544027	-0.242739	0.129979	0.529138	-0.311474	0.178495	0.414557	0.64589	-0.333406	0.250415	0.380602
CL17393.Contig4_DB	1	turquoise	0.874865	-0.717836	0.00201517	0.0294268	0.454571	-0.760597	0.218961	0.0173314	0.905835	0.0595001	0.000768622	0.879144	-0.221748	-0.642458	0.566362	0.0620499	0.902573	-0.643707	0.000863079	0.0613801	0.492658	-0.216718	0.177846	0.575422	-0.274876	-0.658331	0.474097	0.0538721	0.631815	-0.752291	0.0679479	0.0193571	-0.483891	0.128048	0.186886	0.742681	0.483673	-0.476088	0.187114	0.195146	-0.283151	-0.734224	0.460331	0.0242916	-0.268643	-0.716083	0.48458
CL9171.Contig1_DB	1	turquoise	-0.912011	0.746132	0.000609933	0.0209564	-0.418764	0.793195	0.26194	0.0107472	-0.91684	0.124102	0.000503037	0.750403	0.273019	0.710285	0.47721	0.0320138	-0.932182	0.487986	0.000250183	0.182632	-0.442622	0.0814285	0.232842	0.835029	-0.0728267	0.681561	0.852293	0.0431955	-0.492179	0.798211	0.178334	0.00991415	0.481063	0.247649	0.189857	0.520572	-0.432576	0.314949	0.244871	0.409087	0.372512	0.558081	0.323491	0.118394	-0.0819777	0.643536	0.833929
CL2604.Contig2_DB	1	turquoise	0.609297	0.626585	0.0815513	0.0709701	-0.152997	0.532494	0.694332	0.139968	0.618995	0.553598	0.075503	0.12202	-0.611322	0.679821	0.0802648	0.0439436	0.669631	0.00443156	0.0484904	0.990972	-0.116559	0.713244	0.765219	0.0309828	0.0894819	0.737943	0.818921	0.0232149	0.375742	0.439025	0.318978	0.237111	0.103838	0.371531	0.790355	0.324869	-0.124591	-0.174452	0.749446	0.653499	-0.698125	0.172621	0.0364835	0.656955	0.0929205	0.060305	0.812061
CL24474.Contig1_DB	1	turquoise	0.873409	0.704505	0.00209531	0.0340911	0.579392	0.681286	0.102049	0.0433132	0.885089	0.150634	0.001511	0.698874	-0.0944799	0.694422	0.808953	0.0379209	0.876614	0.415887	0.00192168	0.265573	0.594015	0.53399	0.0916744	0.138649	-0.141046	0.748731	0.717384	0.0202713	0.405164	0.616132	0.279344	0.0772583	-0.626038	-0.104607	0.0712909	0.78883	0.579015	0.230394	0.102326	0.550914	-0.16353	0.551008	0.674195	0.124144	-0.127133	0.434365	0.74447
CL17585.Contig1_DB	1	turquoise	0.604594	0.297108	0.0845892	0.43751	0.098298	0.28561	0.801354	0.456275	0.6189	0.111882	0.0755609	0.77444	-0.312743	0.275547	0.412556	0.472975	0.652279	0.121487	0.0569037	0.755532	0.0928266	0.322611	0.812248	0.397148	0.25875	0.283134	0.50141	0.46036	0.262706	0.240887	0.494652	0.532383	-0.14969	0.0252159	0.70069	0.948658	0.0960146	0.026864	0.805897	0.945306	-0.417059	0.185218	0.26409	0.633298	0.271931	0.183146	0.479037
CL1549.Contig1_DB	1	turquoise	-0.539331	0.680178	0.133994	0.0437892	-0.22334	0.540954	0.563506	0.132599	-0.446417	0.848153	0.228383	0.00385957	0.264225	0.746867	0.492066	0.0207611	-0.488212	-0.255656	0.182398	0.506721	-0.229704	0.818916	0.552142	0.00693544	-0.236955	0.752372	0.539299	0.0193365	0.255505	0.450366	0.506981	0.223793	0.307664	0.801355	0.420591	0.00941496	-0.206604	-0.500656	0.593795	0.169821	0.298857	-0.0908922	0.434687	0.816106	-0.242561	-0.0557535	0.52945
CL13648.Contig3_DB	1	turquoise	-0.60662	0.608807	0.0832723	0.0818647	-0.971873	0.590805	1.1954e-05	0.0938937	-0.649463	0.258757	0.0583508	0.501398	-0.528689	0.606655	0.14336	0.0832493	-0.579102	0.298455	0.102262	0.435335	-0.973697	0.49232	9.4715e-06	0.17819	0.287715	0.645932	0.452814	0.0601977	-0.527704	0.519238	0.144246	0.151991	0.977377	0.126171	5.60861e-06	0.746353	-0.973182	0.12223	1.01307e-05	0.754075	-0.496818	0.426625	0.173646	0.25215	0.287687	0.339241	0.45286
CL17244.Contig1_DB	1	turquoise	0.840156	0.861899	0.00458121	0.00280817	0.377468	0.854523	0.316578	0.00334381	0.80576	0.399294	0.00874431	0.287036	-0.39993	0.846701	0.286197	0.00398433	0.809855	0.340144	0.00815076	0.370444	0.430791	0.369844	0.247042	0.327244	-0.659242	0.817335	0.0534248	0.00713799	0.187208	0.834186	0.629587	0.00517656	-0.40592	0.505091	0.278361	0.165461	0.388161	0.0754807	0.301921	0.84696	-0.37021	0.451967	0.326727	0.221946	-0.638094	0.550935	0.0644279
CL14327.Contig2_DB	1	turquoise	0.499226	0.783364	0.17124	0.012514	0.029608	0.8807	0.939727	0.00171512	0.518632	-0.198062	0.152555	0.60947	-0.334673	0.698335	0.378683	0.0364032	0.539602	0.835302	0.133761	0.00506146	0.0419037	-0.0133573	0.914759	0.972793	0.0706664	0.698066	0.856637	0.0365063	0.297639	0.909122	0.436652	0.000680988	-0.0684725	-0.160964	0.861053	0.679084	0.0267625	0.667673	0.945512	0.049397	-0.413825	0.90224	0.268193	0.000873155	0.0968653	0.913323	0.804204
CL2158.Contig1_DB	1	turquoise	-0.83181	0.906411	0.00542754	0.000752721	-0.884432	0.901195	0.00154041	0.000905287	-0.856446	0.281026	0.00319789	0.463851	-0.221737	0.888976	0.566383	0.00134481	-0.805829	0.448429	0.0087342	0.226038	-0.903891	0.448082	0.000823976	0.226441	0.426642	0.879771	0.252129	0.00176066	-0.519779	0.855822	0.151489	0.00324478	0.901884	0.218841	0.000884018	0.571592	-0.887458	0.184961	0.0014081	0.633779	-0.196105	0.56703	0.61308	0.111352	0.413419	0.605881	0.26871
CL7715.Contig4_DB	1	turquoise	0.948924	0.708306	9.43072e-05	0.0327156	0.596155	0.767349	0.0902129	0.0157929	0.970401	-0.132302	1.427e-05	0.734377	-0.161624	0.623918	0.677826	0.0725427	0.956857	0.721515	5.26475e-05	0.0282175	0.637037	0.125244	0.0650119	0.748167	-0.38625	0.632782	0.304515	0.0673978	0.589037	0.78095	0.0951302	0.012976	-0.630143	-0.168938	0.0689048	0.663922	0.618174	0.539871	0.076004	0.133528	-0.210638	0.794429	0.586442	0.0105381	-0.376763	0.785998	0.317558
CL13684.Contig1_DB	1	turquoise	0.769314	0.69986	0.0153629	0.0358227	0.155409	0.566806	0.689706	0.111525	0.779148	0.830322	0.013328	0.00558885	-0.475167	0.776497	0.196134	0.0138577	0.797875	-0.266486	0.00996846	0.488228	0.201043	0.783748	0.603983	0.0124416	-0.321769	0.767663	0.398452	0.0157236	0.439834	0.468182	0.236148	0.20372	-0.177923	0.767949	0.646965	0.0156607	0.187163	-0.50205	0.62967	0.168443	-0.505987	-0.115275	0.164588	0.767749	-0.316973	-0.0524645	0.405918
CL3509.Contig3_DB	1	turquoise	-0.920484	-0.600572	0.000431576	0.0872414	-0.316988	-0.549474	0.405895	0.125413	-0.867552	-0.374227	0.00244009	0.321091	0.462564	-0.641193	0.209937	0.0627336	-0.903437	-0.0201738	0.000837303	0.958916	-0.346067	-0.279589	0.361621	0.466236	0.0377632	-0.583149	0.923161	0.0993187	-0.128551	-0.527349	0.741697	0.144566	0.396352	-0.363622	0.290932	0.336077	-0.313514	0.181556	0.411343	0.640147	0.519499	-0.0599889	0.151748	0.878158	0.016083	-0.209245	0.967243
CL17878.Contig1_DB	1	turquoise	0.814967	0.862592	0.00744878	0.00276117	0.44242	0.822841	0.23308	0.0064497	0.86133	0.458562	0.00284727	0.214429	-0.125047	0.858414	0.748552	0.00305324	0.857595	0.314119	0.00311289	0.410391	0.442426	0.581585	0.233073	0.10045	0.030202	0.887232	0.93852	0.00141772	0.568064	0.7635	0.110555	0.0166583	-0.471641	0.417082	0.199943	0.264061	0.447921	0.0754005	0.226629	0.847121	-0.222976	0.480336	0.564159	0.190625	0.046446	0.445692	0.905551
Unigene35433_DB	1	turquoise	0.764539	0.69888	0.0164215	0.0361949	0.0941656	0.623362	0.809579	0.0728734	0.663771	0.518986	0.051236	0.152225	-0.625681	0.712571	0.0715005	0.0312156	0.724431	0.098154	0.0272824	0.801641	0.148178	0.734652	0.703603	0.024166	-0.0440728	0.744081	0.910361	0.0215078	-0.132526	0.534355	0.73394	0.138327	-0.195914	0.385517	0.613433	0.305513	0.100357	-0.130384	0.797263	0.738118	-0.65552	0.260555	0.0552673	0.498322	-0.0398428	0.21823	0.91894
CL620.Contig4_DB	1	turquoise	0.450519	0.896158	0.223616	0.00107191	0.549942	0.841694	0.125024	0.00443585	0.512835	0.44756	0.158005	0.22705	0.205203	0.90881	0.596356	0.000688971	0.457355	0.262241	0.215794	0.495443	0.555619	0.635308	0.120378	0.065975	-0.633375	0.90578	0.0670622	0.000770126	0.423812	0.769013	0.255631	0.0154282	-0.505894	0.311512	0.164679	0.414497	0.558339	-0.0209004	0.118188	0.957438	0.233026	0.399137	0.546244	0.287243	-0.625961	0.427157	0.0713361
CL20050.Contig1_DB	1	turquoise	0.482186	0.742489	0.188674	0.0219423	0.194575	0.726306	0.615909	0.026692	0.42599	0.236862	0.252934	0.539463	-0.188467	0.720907	0.627243	0.0284148	0.456724	0.416127	0.216509	0.265269	0.181647	0.524563	0.639977	0.147092	0.490783	0.756331	0.179758	0.0183532	-0.0747636	0.665737	0.8484	0.0503039	-0.276369	0.0931127	0.471601	0.811678	0.159478	0.195421	0.681921	0.614344	-0.274746	0.552964	0.474316	0.122538	0.524147	0.482551	0.147471
CL6799.Contig1_DB	1	turquoise	0.837258	0.89013	0.004864	0.00129803	0.677253	0.90915	0.0450622	0.000680255	0.839827	0.157057	0.00461271	0.686551	-0.0164666	0.848592	0.966462	0.00382237	0.814905	0.584503	0.00745706	0.0983454	0.721247	0.387899	0.0283043	0.302276	-0.368161	0.865365	0.329621	0.0025783	0.491866	0.877991	0.178652	0.00185028	-0.713878	0.0960771	0.0307649	0.805773	0.697655	0.353498	0.0366642	0.350698	-0.0469485	0.714195	0.904533	0.0306565	-0.367456	0.696805	0.33062
Unigene35557_DB	1	turquoise	-0.644658	0.513518	0.0608729	0.157358	-0.750161	0.46038	0.0199007	0.212382	-0.629686	0.321208	0.069168	0.399322	-0.224403	0.522784	0.561602	0.148718	-0.601513	0.170212	0.0866165	0.661511	-0.764689	0.39661	0.0163876	0.290589	0.146881	0.541	0.706105	0.132559	-0.245187	0.426073	0.52486	0.252831	0.80086	0.236806	0.00949232	0.539561	-0.743847	-0.0235553	0.0215712	0.952036	-0.185791	0.260339	0.632229	0.498691	0.142026	0.220354	0.715486
CL15634.Contig1_DB	1	turquoise	0.492855	0.601173	0.177646	0.0868418	0.581925	0.594456	0.100203	0.0913718	0.586747	0.342883	0.0967458	0.366351	0.342132	0.596714	0.367471	0.0898331	0.548039	0.230997	0.126607	0.549842	0.571491	0.290067	0.107938	0.44896	0.187703	0.60525	0.628665	0.0841614	0.767213	0.565116	0.0158229	0.112836	-0.594892	0.431486	0.0910733	0.246195	0.597531	0.0794797	0.0892803	0.838935	0.218958	0.340672	0.571382	0.369653	0.181435	0.343099	0.640373
CL28741.Contig1_DB	1	turquoise	0.941431	0.764482	0.000151144	0.0164344	0.280614	0.726284	0.464533	0.026699	0.883298	0.373753	0.00159212	0.321754	-0.544175	0.7862	0.129853	0.0119858	0.921031	0.166909	0.000421505	0.667771	0.324212	0.366832	0.394674	0.331505	-0.197966	0.744476	0.609647	0.0214009	0.123124	0.705174	0.75232	0.0338463	-0.357067	0.367314	0.345509	0.330821	0.283843	-0.0689858	0.459188	0.860019	-0.581498	0.245822	0.100513	0.523753	-0.177268	0.371832	0.648196
CL25655.Contig1_DB	1	turquoise	0.715386	0.627509	0.0302505	0.0704303	0.75959	0.656375	0.0175692	0.0548404	0.724504	-0.105871	0.0272593	0.786326	0.224455	0.5613	0.561508	0.115831	0.69494	0.624641	0.0377179	0.0721145	0.77317	0.245536	0.0145419	0.524251	0.0266898	0.597984	0.94566	0.0889753	0.497026	0.638653	0.173437	0.0641198	-0.802702	-0.272344	0.00920629	0.478344	0.770376	0.472442	0.0151337	0.199074	0.154186	0.71115	0.692051	0.03171	0.0226207	0.630564	0.953937
CL11685.Contig2_DB	1	turquoise	0.921423	0.630617	0.000414401	0.0686329	0.170827	0.548885	0.660347	0.125902	0.883587	0.636311	0.00157884	0.0654154	-0.617725	0.653696	0.0762786	0.0561845	0.92627	-0.130412	0.000333236	0.738063	0.217397	0.526242	0.574197	0.145567	-0.221767	0.604564	0.566328	0.0846084	0.222487	0.49321	0.565035	0.177285	-0.235769	0.709953	0.541392	0.0321308	0.185394	-0.352045	0.632969	0.35282	-0.66051	-0.0324395	0.052806	0.933973	-0.205511	0.12564	0.595793
CL27203.Contig1_DB	1	turquoise	0.831016	0.19183	0.00551323	0.620994	0.164502	0.117719	0.672344	0.762937	0.819243	0.217011	0.00689404	0.574892	-0.474411	0.237159	0.196947	0.538939	0.862279	-0.101693	0.00278234	0.79461	0.188574	0.256082	0.627042	0.505989	0.112728	0.233307	0.77277	0.545746	0.301869	0.0899712	0.429843	0.817944	-0.235062	0.054145	0.542641	0.889966	0.178107	-0.206131	0.646618	0.59466	-0.568878	-0.0836409	0.10993	0.830598	0.117575	-0.0838017	0.763221
CL8000.Contig3_DB	1	turquoise	-0.912748	-0.768142	0.000592692	0.0156184	-0.750111	-0.670787	0.0199134	0.0479599	-0.924846	-0.550048	0.000355798	0.124937	-0.0019311	-0.829195	0.996066	0.00571315	-0.894319	-0.0629946	0.00113773	0.872092	-0.788123	-0.745436	0.0116362	0.0211424	0.45594	-0.854722	0.217401	0.0033285	-0.511908	-0.578612	0.158888	0.102621	0.783447	-0.320566	0.0124983	0.400319	-0.762506	0.196873	0.0168867	0.611663	0.0290589	-0.211456	0.940843	0.584955	0.445399	-0.164601	0.229575
Unigene32834_DB	1	turquoise	0.844608	0.710164	0.00416906	0.0320563	0.350902	0.713183	0.354495	0.0310042	0.862973	0.114008	0.0027355	0.770246	-0.254318	0.67762	0.509026	0.0449014	0.88329	0.447438	0.00159251	0.227191	0.364923	0.388193	0.33422	0.301878	0.186432	0.690209	0.631033	0.0396003	0.502368	0.662483	0.16813	0.0518526	-0.413918	-0.0304438	0.268074	0.938028	0.363528	0.26026	0.336212	0.498826	-0.373741	0.54843	0.32177	0.126281	0.19319	0.528497	0.618473
Unigene37604_DB	1	turquoise	-0.635157	-0.754258	0.0660597	0.0188638	-0.139059	-0.639187	0.721236	0.0638266	-0.590655	-0.698013	0.0939984	0.0365268	0.377756	-0.816325	0.316179	0.00726941	-0.635948	0.0834261	0.0656176	0.831028	-0.162727	-0.681585	0.675725	0.0431853	-0.200179	-0.800686	0.605572	0.00951969	-0.0865538	-0.566604	0.824771	0.111682	0.225275	-0.612716	0.560041	0.079386	-0.14075	0.36256	0.717958	0.337597	0.458699	-0.0428972	0.214274	0.912745	-0.207321	-0.103684	0.592486
CL14807.Contig3_DB	1	turquoise	0.622952	0.232442	0.0731178	0.547278	0.0977958	0.30054	0.802353	0.431977	0.607442	-0.343966	0.0827413	0.36474	-0.462323	0.156509	0.210206	0.687599	0.627836	0.572139	0.0702398	0.107448	0.150736	0.0448893	0.698679	0.908706	-0.465231	0.227655	0.206973	0.555791	0.211886	0.289574	0.584175	0.449766	-0.116727	-0.502974	0.764889	0.167534	0.130947	0.572652	0.737019	0.107061	-0.448805	0.630948	0.225602	0.068443	-0.473593	0.459815	0.197829
Unigene31774_DB	1	turquoise	-0.73553	-0.441502	0.0239097	0.234167	-0.19137	-0.385817	0.621847	0.305104	-0.783647	-0.429488	0.0124606	0.248634	0.319294	-0.482957	0.402296	0.187865	-0.801901	0.120353	0.00932998	0.757758	-0.22048	-0.207412	0.568642	0.59232	-0.0220035	-0.420668	0.955193	0.259551	-0.642936	-0.392214	0.0617932	0.296458	0.228496	-0.547941	0.554292	0.126688	-0.22595	0.29563	0.558834	0.439904	0.424038	0.0900266	0.255351	0.817833	-0.0176494	-0.0835122	0.964054
CL10031.Contig1_DB	1	turquoise	-0.726915	0.682203	0.026502	0.0429219	0.0940269	0.552218	0.809856	0.123149	-0.628599	0.767031	0.0697964	0.0158632	0.762947	0.752002	0.0167851	0.0194302	-0.707235	-0.189537	0.0330995	0.625251	0.0524796	0.888056	0.893334	0.00138292	-0.101226	0.774439	0.795537	0.0142782	0.169262	0.424733	0.663309	0.254488	0.00326052	0.590962	0.993358	0.0937841	0.0903404	-0.422348	0.817207	0.257453	0.804208	-0.0181217	0.00897682	0.963093	-0.111139	-0.0417822	0.775907
CL9071.Contig1_DB	1	turquoise	0.760174	0.755636	0.017431	0.0185233	0.319237	0.620503	0.402386	0.0745886	0.750735	0.73154	0.0197533	0.0250887	-0.318094	0.819048	0.404167	0.00691874	0.762606	-0.0960795	0.0168637	0.805768	0.346086	0.893094	0.361593	0.00118311	-0.361276	0.841924	0.339438	0.00441437	0.231323	0.511399	0.549263	0.159374	-0.349021	0.523866	0.357259	0.147728	0.327768	-0.375856	0.389202	0.318818	-0.333583	0.0722004	0.380334	0.853552	-0.347565	0.0449793	0.359407
CL9348.Contig1_DB	1	turquoise	0.810193	0.83085	0.008103	0.00553117	0.615404	0.922361	0.0777088	0.000397711	0.740599	-0.195606	0.0224656	0.614003	-0.124388	0.754302	0.749843	0.0188528	0.742468	0.844237	0.0219481	0.00420236	0.65292	-0.00733509	0.0565776	0.985058	-0.289789	0.746788	0.449415	0.0207819	0.021331	0.953073	0.956561	7.03927e-05	-0.688444	-0.185514	0.0403177	0.632746	0.609914	0.655855	0.0811578	0.0550995	-0.131219	0.905237	0.736489	0.000785358	-0.280969	0.930144	0.463945
CL22225.Contig1_DB	1	turquoise	-0.573489	0.536628	0.10643	0.136337	0.204707	0.53946	0.597264	0.133883	-0.529114	0.060105	0.142979	0.877923	0.770848	0.500874	0.0150327	0.169605	-0.582761	0.331875	0.0995988	0.382929	0.136154	0.281833	0.726879	0.462513	0.502765	0.52028	0.167739	0.151025	-0.0367979	0.503823	0.92512	0.166701	-0.1696	-0.0486806	0.662669	0.901024	0.172112	0.238173	0.657916	0.537154	0.74601	0.419397	0.0209888	0.261145	0.501585	0.400072	0.168902
CL21281.Contig1_DB	1	turquoise	0.545891	-0.657437	0.128405	0.0543133	0.699719	-0.705227	0.0358758	0.0338269	0.537905	0.114535	0.135227	0.769208	0.286973	-0.619491	0.454033	0.0752016	0.514559	-0.586518	0.156373	0.0969084	0.710525	-0.0404559	0.0319294	0.917696	0.0271698	-0.609951	0.944684	0.0811346	0.267125	-0.705949	0.487146	0.0335641	-0.750538	0.198363	0.0198037	0.608915	0.70804	-0.444435	0.0328106	0.230706	0.232736	-0.62659	0.546756	0.0709669	0.00628056	-0.643493	0.987206
Unigene34087_DB	1	turquoise	0.939617	0.971195	0.000167871	1.29854e-05	0.596459	0.976354	0.0900061	6.54137e-06	0.980109	0.270408	3.58438e-06	0.481601	-0.116562	0.947851	0.765214	0.000101317	0.964119	0.516461	2.78176e-05	0.154583	0.628212	0.39956	0.0700209	0.286685	-0.28132	0.941384	0.463363	0.000151561	0.677223	0.945623	0.0450754	0.00011703	-0.625005	0.249653	0.0718991	0.517092	0.621139	0.254304	0.0742051	0.50905	-0.18534	0.642357	0.63307	0.0621045	-0.275987	0.681747	0.47224
CL10110.Contig1_DB	1	turquoise	0.912614	0.751077	0.000595803	0.0196656	0.248474	0.782024	0.519137	0.0127691	0.887275	-0.048892	0.00141586	0.900596	-0.515604	0.688773	0.155388	0.0401831	0.920984	0.667403	0.00042237	0.049523	0.297505	0.293633	0.436869	0.443146	-0.205918	0.724461	0.595049	0.0272729	0.347959	0.758328	0.358825	0.0178701	-0.307111	-0.201548	0.421468	0.603055	0.274392	0.488523	0.474908	0.182079	-0.563766	0.773024	0.11389	0.0145725	-0.199662	0.699042	0.606522
CL22844.Contig1_DB	1	turquoise	0.620836	0.821125	0.0743871	0.0066591	0.0810286	0.714573	0.83583	0.030527	0.627845	0.737421	0.0702345	0.023364	-0.369125	0.868866	0.328259	0.00235956	0.664584	-0.0689094	0.0508492	0.860173	0.094315	0.714912	0.809282	0.0304116	0.12766	0.853759	0.74344	0.00340297	0.324705	0.631185	0.393912	0.0683076	-0.126703	0.69508	0.745312	0.0376627	0.0976101	-0.331973	0.802722	0.382781	-0.452207	0.0795319	0.221671	0.83883	0.131636	0.154897	0.735675
CL11976.Contig1_DB	1	turquoise	0.82907	0.593472	0.00572711	0.0920477	0.0989971	0.628808	0.799965	0.0696753	0.751755	-0.0143852	0.0194929	0.9707	-0.650404	0.588351	0.0578649	0.0956124	0.808886	0.440924	0.00828865	0.234851	0.151288	-0.0397608	0.697617	0.919107	-0.0964936	0.550953	0.804944	0.12419	-0.00321444	0.663995	0.993452	0.0511292	-0.191921	0.0133411	0.620825	0.972826	0.106639	0.264663	0.784806	0.491321	-0.691313	0.453525	0.0391556	0.220158	-0.085275	0.535013	0.827328
Unigene32563_DB	1	turquoise	0.858165	-0.937728	0.00307129	0.000186628	0.456153	-0.866624	0.217159	0.00249807	0.905745	-0.615776	0.000771121	0.0774789	-0.223338	-0.95874	0.56351	4.51153e-05	0.887365	-0.15422	0.00141205	0.691986	0.496072	-0.668155	0.174394	0.0491729	-0.549086	-0.948967	0.125735	9.40283e-05	0.637242	-0.796776	0.0648984	0.0101478	-0.457075	-0.580756	0.216112	0.101052	0.483849	0.132281	0.186931	0.734417	-0.248861	-0.310157	0.518466	0.416638	-0.537378	-0.37211	0.135685
CL23778.Contig1_DB	1	turquoise	0.506256	-0.811332	0.164327	0.00794352	0.13426	-0.817906	0.730563	0.0070644	0.503725	-0.286821	0.166797	0.454283	-0.21423	-0.795289	0.579922	0.0103939	0.534116	-0.41344	0.138538	0.268683	0.155195	-0.35742	0.690116	0.344997	0.384448	-0.806247	0.306971	0.00867227	0.330095	-0.78654	0.385642	0.0119235	-0.205082	-0.313577	0.596577	0.411243	0.155001	-0.212664	0.690488	0.582763	-0.326828	-0.542847	0.390646	0.130981	0.369477	-0.543833	0.327761
CL4579.Contig1_DB	1	turquoise	0.814311	-0.570041	0.00753642	0.109041	0.104228	-0.621513	0.789582	0.07398	0.770902	0.197066	0.0150211	0.611307	-0.5548	-0.52007	0.121042	0.15122	0.825073	-0.5826	0.00618402	0.0997145	0.125848	-0.0814039	0.746985	0.835078	0.176347	-0.53513	0.64993	0.137647	0.114952	-0.613627	0.768385	0.0788151	-0.189465	0.339375	0.625385	0.371597	0.102827	-0.489065	0.79236	0.18152	-0.641123	-0.634835	0.0627713	0.0662398	0.193505	-0.603412	0.617889
Unigene2268_DB	1	turquoise	0.941805	-0.905325	0.000147842	0.000782865	0.677417	-0.822033	0.0449903	0.00654768	0.960376	-0.541617	3.92236e-05	0.13203	-0.0922133	-0.931445	0.813471	0.000259634	0.935281	-0.191952	0.000213062	0.620768	0.71836	-0.744945	0.0292526	0.0212743	-0.50161	-0.94665	0.168877	0.000109591	0.548219	-0.736204	0.126456	0.0237142	-0.703992	-0.360792	0.0342797	0.340133	0.695039	0.0950648	0.0376788	0.807788	-0.120723	-0.351572	0.757032	0.353513	-0.490547	-0.34101	0.179999
CL20756.Contig2_DB	1	turquoise	0.816638	0.636892	0.00722857	0.0650922	0.0926483	0.541013	0.812603	0.132548	0.781548	0.468858	0.0128605	0.202978	-0.642038	0.701673	0.0622766	0.03514	0.819397	-0.00582782	0.00687463	0.988128	0.1483	0.600284	0.703367	0.0874332	-0.477131	0.701807	0.19403	0.0350899	0.158344	0.464989	0.684088	0.20724	-0.134609	0.244696	0.729883	0.525717	0.114639	-0.236609	0.769003	0.539909	-0.640558	0.0924189	0.0630782	0.813061	-0.466882	0.094924	0.205149
CL29414.Contig1_DB	1	turquoise	-0.73493	0.797508	0.0240846	0.0100281	-0.433268	0.88464	0.244031	0.00153103	-0.643885	-0.18176	0.0612846	0.639764	0.303949	0.709065	0.426511	0.0324453	-0.65631	0.817118	0.0548728	0.00716605	-0.486059	0.0176758	0.184627	0.964001	0.489477	0.699834	0.181096	0.0358325	0.141491	0.912796	0.716523	0.00059157	0.498476	-0.159335	0.171987	0.682195	-0.429929	0.630332	0.248095	0.0687961	0.266691	0.879176	0.48788	0.00179027	0.478407	0.912995	0.19267
CL1682.Contig2_DB	1	turquoise	0.954757	0.732397	6.20434e-05	0.0248323	0.434792	0.830032	0.24219	0.00562069	0.911556	-0.280522	0.000620772	0.464686	-0.361842	0.647498	0.338626	0.0593738	0.937089	0.820932	0.00019329	0.00668289	0.472989	-0.128899	0.198482	0.741018	-0.0400493	0.629721	0.918521	0.0691479	0.282277	0.883614	0.461777	0.00157761	-0.515461	-0.245407	0.155522	0.524476	0.443356	0.667902	0.231976	0.0492905	-0.428586	0.852974	0.249739	0.00346459	-0.0272362	0.905335	0.944549
Unigene37342_DB	1	turquoise	0.913844	0.445711	0.00056766	0.229208	0.3623	0.552759	0.337968	0.122705	0.855154	-0.212564	0.00329541	0.582943	-0.447255	0.382448	0.227405	0.309709	0.882579	0.610213	0.00162555	0.0809675	0.406092	-0.307137	0.278138	0.421428	-0.246067	0.352284	0.523326	0.352471	0.159526	0.628847	0.681829	0.0696528	-0.42693	0.0093014	0.251775	0.981053	0.37039	0.509092	0.326474	0.161584	-0.46793	0.609668	0.203996	0.0813148	-0.228404	0.682114	0.554455
CL27820.Contig1_DB	1	turquoise	0.919892	0.753977	0.000442667	0.0189337	0.532943	0.63219	0.139571	0.0677344	0.953189	0.837187	6.97966e-05	0.00487107	-0.152662	0.815389	0.694976	0.00739275	0.949231	-0.206679	9.23638e-05	0.593658	0.55736	0.747292	0.118973	0.0206488	-0.150913	0.79504	0.698338	0.0104355	0.595221	0.547551	0.0908485	0.127014	-0.573951	0.843162	0.106084	0.00430004	0.552637	-0.467169	0.122805	0.204833	-0.236991	-0.0565614	0.539236	0.885081	-0.147325	0.0372742	0.705247
CL8293.Contig6_DB	1	turquoise	-0.660533	0.587266	0.0527949	0.0963785	-0.598693	0.517754	0.0884977	0.153373	-0.601809	0.289972	0.0864202	0.449115	0.0304	0.615569	0.938117	0.0776065	-0.591495	0.121056	0.0934141	0.756379	-0.637966	0.564162	0.064498	0.113581	0.433323	0.635388	0.243965	0.06593	-0.0214398	0.452533	0.95634	0.221296	0.65038	0.0354044	0.0578768	0.92795	-0.596793	-0.0714619	0.0897796	0.855037	0.00971929	0.222779	0.980202	0.564512	0.426315	0.189188	0.252532
CL2572.Contig2_DB	1	turquoise	0.894482	0.878895	0.00113178	0.00180437	0.611642	0.852892	0.0800621	0.003471	0.847941	0.242688	0.00387761	0.529226	-0.196625	0.863476	0.612121	0.00270191	0.842602	0.46939	0.00435145	0.202396	0.661476	0.556714	0.0523377	0.119493	-0.503519	0.897647	0.166999	0.00102062	0.203196	0.793987	0.600032	0.0106125	-0.660749	0.0458142	0.0526899	0.906831	0.622397	0.227015	0.0734498	0.556932	-0.187257	0.613755	0.629495	0.0787355	-0.495856	0.551219	0.174611
CL1451.Contig1_DB	1	turquoise	0.842199	0.863737	0.00438872	0.00268461	0.549595	0.850327	0.125313	0.00367779	0.864823	0.223222	0.00261335	0.563717	-0.146356	0.839486	0.707116	0.00464552	0.840668	0.496985	0.00453245	0.173478	0.591616	0.516837	0.0933301	0.154231	-0.508894	0.875705	0.161775	0.00196988	0.546898	0.803906	0.12756	0.00902246	-0.561971	0.0784379	0.115301	0.841025	0.569132	0.260507	0.109736	0.498403	-0.162742	0.643506	0.675696	0.0614877	-0.493923	0.581496	0.176562
CL5562.Contig2_DB	1	turquoise	0.835953	0.637438	0.00499513	0.06479	0.499639	0.692395	0.17083	0.0387228	0.816267	-0.112816	0.00727707	0.772598	-0.224712	0.569705	0.561048	0.109297	0.811636	0.631709	0.00790133	0.0680085	0.544705	0.132543	0.129406	0.733907	-0.416326	0.605669	0.265018	0.0838885	0.349443	0.688424	0.356639	0.0403259	-0.530937	-0.170342	0.14135	0.661264	0.520275	0.532954	0.15103	0.139562	-0.229164	0.725195	0.553102	0.0270409	-0.410688	0.662222	0.272205
CL2355.Contig2_DB	1	turquoise	0.812209	0.507403	0.0078222	0.163215	0.675361	0.406957	0.0458984	0.277016	0.767746	0.635883	0.0157053	0.0656538	-0.0683951	0.570859	0.861209	0.108418	0.751284	-0.193951	0.0196127	0.617064	0.728629	0.710717	0.0259723	0.0318618	-0.498099	0.571845	0.172364	0.10767	0.218298	0.304301	0.572571	0.425949	-0.726312	0.523987	0.0266901	0.147617	0.686624	-0.408603	0.0410663	0.274888	-0.0589385	-0.0713688	0.880279	0.855224	-0.494908	-0.0597	0.175567
CL1071.Contig1_DB	1	turquoise	0.646042	0.367897	0.0601394	0.329995	-0.243799	0.238856	0.527285	0.535951	0.583626	0.58651	0.0989751	0.0969144	-0.821655	0.41876	0.00659396	0.261945	0.661299	-0.19656	0.0524237	0.61224	-0.203165	0.850812	0.60009	0.0036381	0.0198817	0.495629	0.959511	0.17484	-0.0252145	0.116557	0.948661	0.765224	0.171721	0.324159	0.658656	0.394754	-0.233144	-0.343868	0.546033	0.364885	-0.863956	-0.029888	0.00267011	0.939158	0.0372521	-0.190276	0.924198
CL6790.Contig3_DB	1	turquoise	0.93746	0.617004	0.000189398	0.0767212	0.279997	0.555048	0.465558	0.12084	0.881961	0.60921	0.00165466	0.081607	-0.549515	0.648841	0.125379	0.0586735	0.916876	-0.0405759	0.000502283	0.917453	0.326414	0.505263	0.391282	0.165293	-0.284964	0.622047	0.457338	0.0736591	0.137271	0.500079	0.724709	0.170392	-0.347826	0.694638	0.359021	0.0378362	0.286196	-0.274298	0.45531	0.475065	-0.573966	0.0687675	0.106072	0.860459	-0.263888	0.156422	0.492639
CL6275.Contig2_DB	1	turquoise	0.846927	-0.785719	0.00396472	0.0120743	0.853845	-0.781882	0.00339626	0.0127962	0.841246	-0.317841	0.00447785	0.404563	0.161097	-0.77404	0.678831	0.0143609	0.806032	-0.282594	0.008704	0.461253	0.8762	-0.259102	0.00194356	0.500807	-0.299943	-0.707196	0.432936	0.0331132	0.382233	-0.774162	0.310004	0.0143355	-0.895957	-0.416336	0.00107897	0.265004	0.854088	-0.0237708	0.00337741	0.951597	0.128334	-0.342849	0.742121	0.366402	-0.29193	-0.52194	0.445918
CL21615.Contig1_DB	1	turquoise	0.670939	-0.754496	0.0478908	0.0188048	0.351182	-0.638597	0.354085	0.0641506	0.651041	-0.716517	0.0575371	0.0298684	-0.272706	-0.798004	0.477736	0.00994766	0.645317	0.0636361	0.0605231	0.870798	0.412281	-0.736443	0.270164	0.0236453	-0.586188	-0.798391	0.0971428	0.00988505	0.277198	-0.569416	0.470218	0.109518	-0.371502	-0.65832	0.32491	0.0538776	0.379294	0.341699	0.314051	0.368118	-0.246555	-0.0862194	0.522475	0.82544	-0.587876	-0.124007	0.095947
CL27318.Contig1_DB	1	turquoise	0.944509	0.87735	0.000125505	0.00188327	0.468093	0.899304	0.203818	0.000965556	0.912492	0.0658007	0.000598628	0.866435	-0.330773	0.829971	0.384609	0.00562741	0.92491	0.656657	0.000354768	0.0547002	0.499523	0.347747	0.170945	0.359137	-0.236974	0.862183	0.539266	0.00278888	0.27147	0.872744	0.479813	0.00213267	-0.523037	-0.0546378	0.148486	0.888969	0.470075	0.4472	0.201648	0.227468	-0.366887	0.782682	0.331426	0.0126435	-0.213341	0.723738	0.581534
Unigene34432_DB	1	turquoise	0.63271	0.765032	0.0674388	0.0163102	0.0428122	0.769982	0.912917	0.0152185	0.588339	0.0915748	0.0956207	0.814744	-0.451295	0.757555	0.222721	0.018056	0.643026	0.512134	0.0617445	0.158672	0.0437777	0.396549	0.910959	0.29067	0.330866	0.792709	0.384466	0.0108303	-0.0107184	0.729547	0.978167	0.0256915	-0.120822	-0.0967874	0.756838	0.804359	0.0323486	0.308764	0.934157	0.418845	-0.536475	0.627023	0.136471	0.0707138	0.345336	0.548031	0.362705
CL7054.Contig1_DB	1	turquoise	0.975625	0.511544	7.26947e-06	0.159235	0.608562	0.469589	0.0820217	0.202178	0.960384	0.494665	3.91956e-05	0.175812	-0.180759	0.536446	0.64164	0.136497	0.962663	-0.0403312	3.19268e-05	0.917949	0.64277	0.368677	0.061882	0.328892	-0.15527	0.489363	0.689973	0.181214	0.40766	0.432433	0.276106	0.245044	-0.674506	0.60781	0.0462794	0.0825042	0.619312	-0.2529	0.0753103	0.511472	-0.246921	0.0295772	0.521838	0.93979	-0.14765	0.157658	0.70462
Unigene2741_DB	1	turquoise	-0.764451	-0.600097	0.0164417	0.0875579	-0.547092	-0.703681	0.127398	0.0343942	-0.737725	0.167898	0.0232771	0.665894	0.0459966	-0.52472	0.906462	0.146949	-0.74428	-0.607321	0.0214538	0.0828197	-0.557368	0.239728	0.118966	0.534419	-0.193079	-0.458688	0.618679	0.214287	-0.226027	-0.760506	0.558698	0.0173528	0.627298	-0.041573	0.0705529	0.91543	-0.540316	-0.478859	0.133145	0.19219	0.136221	-0.604771	0.726749	0.0844733	-0.198042	-0.773555	0.609507
Unigene38316_DB	1	turquoise	-0.742181	-0.713172	0.022027	0.031008	-0.516087	-0.731726	0.154934	0.0250328	-0.687895	-0.266817	0.0405423	0.487667	0.158854	-0.697216	0.683114	0.0368333	-0.687887	-0.317158	0.0405458	0.405629	-0.539746	-0.140537	0.133637	0.71837	0.348602	-0.633406	0.357877	0.0670447	0.0166895	-0.739006	0.966008	0.0229132	0.565235	-0.434151	0.112744	0.242963	-0.503413	-0.0835861	0.167103	0.830708	0.150674	-0.366871	0.698797	0.331449	0.330898	-0.532236	0.384418
CL2825.Contig1_DB	1	turquoise	-0.797128	-0.474287	0.0100902	0.197081	-0.247361	-0.420476	0.521073	0.259791	-0.700826	-0.309497	0.035458	0.417683	0.491306	-0.478546	0.179223	0.192523	-0.75085	-0.0764198	0.0197237	0.845075	-0.300167	-0.46638	0.432577	0.205702	0.0895166	-0.480005	0.818852	0.190975	0.0622711	-0.348398	0.873552	0.358178	0.344072	-0.166819	0.364581	0.667941	-0.259758	0.0820814	0.499684	0.833721	0.516555	-0.159644	0.154495	0.681604	0.0925962	-0.163121	0.812707
CL28636.Contig1_DB	1	turquoise	0.753436	0.870341	0.019069	0.00227138	0.671035	0.787845	0.0478469	0.0116863	0.814586	0.669145	0.00749955	0.0487142	0.0756259	0.9042	0.846669	0.000815013	0.763518	0.0824221	0.0166541	0.833039	0.702482	0.65727	0.0348384	0.0543959	-0.692251	0.903302	0.0387804	0.000841281	0.650073	0.721335	0.0580353	0.028276	-0.649091	0.658219	0.0585436	0.0539272	0.694533	-0.190934	0.0378775	0.622656	0.0779533	0.240155	0.841997	0.533668	-0.684561	0.279162	0.0419253
CL15624.Contig1_DB	1	turquoise	-0.422599	0.899167	0.25714	0.000970035	0.207827	0.928488	0.591563	0.000300109	-0.436965	0.0407094	0.239575	0.917182	0.461734	0.85368	0.210864	0.00340916	-0.489648	0.678337	0.180921	0.044588	0.211769	0.306401	0.584387	0.422599	-0.463032	0.870068	0.209415	0.00228756	-0.214771	0.906184	0.578943	0.000758961	-0.154944	-0.074353	0.690598	0.849225	0.204786	0.454158	0.597119	0.219433	0.58029	0.788468	0.101393	0.0115741	-0.471364	0.760361	0.200244
Unigene35037_DB	1	turquoise	-0.862024	0.843271	0.0027997	0.00428999	-0.381879	0.825764	0.310489	0.00610333	-0.803877	0.22314	0.00902695	0.563865	0.385733	0.831191	0.305218	0.00549421	-0.828649	0.458507	0.0057741	0.214491	-0.437028	0.509599	0.239499	0.161097	0.220169	0.863098	0.5692	0.00272711	-0.167457	0.779931	0.666732	0.0131742	0.463102	0.0634201	0.209337	0.871234	-0.393882	0.223463	0.294223	0.563286	0.420767	0.596752	0.259427	0.0898077	0.213193	0.542056	0.581803
CL6508.Contig1_DB	1	turquoise	0.838458	0.930525	0.00474551	0.000271795	0.0552423	0.961764	0.887747	3.4667e-05	0.765261	0.102982	0.0162586	0.792053	-0.712017	0.882976	0.0314079	0.00160702	0.821156	0.638683	0.00665532	0.0641033	0.111215	0.290171	0.775758	0.448791	-0.177453	0.877467	0.647849	0.00187724	0.0462746	0.945027	0.905898	0.000121509	-0.134548	0.0644881	0.730002	0.86908	0.0661128	0.399153	0.865806	0.287222	-0.73908	0.74417	0.0228921	0.0214837	-0.15921	0.775038	0.682433
CL8014.Contig2_DB	1	turquoise	0.899579	0.680788	0.000956635	0.0435268	0.672909	0.617754	0.0469963	0.0762611	0.898179	0.375967	0.00100269	0.318665	-0.0921812	0.683793	0.813535	0.0422481	0.875907	0.21449	0.00195911	0.579451	0.721253	0.700955	0.0283024	0.0354094	-0.557933	0.733683	0.118513	0.0244509	0.44005	0.526723	0.23589	0.145131	-0.702605	0.152281	0.0347925	0.695708	0.694633	0.00673481	0.037838	0.98628	-0.0989487	0.371628	0.800061	0.324731	-0.556609	0.274726	0.119577
CL16241.Contig1_DB	1	turquoise	0.689252	0.947083	0.0399883	0.000106552	0.028087	0.891165	0.942819	0.00125707	0.603386	0.560659	0.0853803	0.116339	-0.642367	0.962295	0.0620992	3.30311e-05	0.656022	0.219598	0.0550165	0.570228	0.0863951	0.569869	0.825088	0.109173	-0.242365	0.940652	0.529793	0.00015817	-0.0493166	0.837915	0.899736	0.00479886	-0.0906989	0.559301	0.816492	0.117419	0.0495819	-0.0754001	0.899199	0.847122	-0.631251	0.356675	0.06827	0.346077	-0.24101	0.439109	0.532167
CL24006.Contig1_DB	1	turquoise	0.993006	0.693528	9.35595e-08	0.0382735	0.469057	0.807132	0.20276	0.0085423	0.964603	-0.30047	2.65382e-05	0.43209	-0.364787	0.607126	0.334414	0.0829453	0.979683	0.803795	3.85871e-06	0.00903928	0.508882	-0.216168	0.161787	0.576416	-0.246629	0.558691	0.522347	0.117906	0.3251	0.868188	0.393303	0.00240086	-0.53125	-0.20277	0.141072	0.600814	0.477949	0.638286	0.193158	0.0643219	-0.411113	0.805275	0.271659	0.00881661	-0.229172	0.920401	0.553088
Unigene2971_DB	1	turquoise	0.337019	0.548228	0.375139	0.126449	-0.385205	0.478208	0.305938	0.192883	0.26459	0.35234	0.491446	0.35239	-0.670644	0.607961	0.0480253	0.0824071	0.355151	0.07465	0.348289	0.848629	-0.369066	0.548712	0.328342	0.126046	0.486026	0.650998	0.184661	0.0575591	-0.224775	0.403837	0.560936	0.281074	0.291808	0.112611	0.446117	0.773001	-0.38544	-0.0889415	0.305617	0.82	-0.751028	0.192052	0.0196783	0.620582	0.488238	0.0934256	0.182372
CL1235.Contig3_DB	1	turquoise	0.542827	0.943944	0.130998	0.000129955	0.0630528	0.898363	0.871975	0.000996564	0.614277	0.50696	0.0784094	0.163644	-0.278571	0.950774	0.467929	8.30344e-05	0.624504	0.270462	0.0721951	0.48151	0.0822502	0.577323	0.833383	0.103572	-0.0063485	0.938416	0.987067	0.000179629	0.688537	0.837111	0.0402797	0.00487864	-0.0659763	0.475943	0.866081	0.195301	0.0989759	-0.0115489	0.800007	0.976475	-0.365105	0.412645	0.33396	0.269698	-0.00420362	0.47107	0.991437
CL17192.Contig2_DB	1	turquoise	0.850524	0.795848	0.00366166	0.0103009	0.703423	0.873669	0.0344894	0.00208082	0.880599	-0.0860397	0.00172007	0.825799	0.0263297	0.724201	0.946393	0.0273553	0.843294	0.731745	0.00428788	0.0250271	0.72734	0.0631903	0.0263702	0.871697	-0.429069	0.70612	0.249146	0.0335019	0.544349	0.890718	0.129706	0.00127463	-0.714836	-0.0385667	0.0304376	0.92153	0.711368	0.528522	0.0316341	0.14351	-0.000945577	0.796676	0.998074	0.0101643	-0.411932	0.848566	0.27061
CL12341.Contig1_DB	1	turquoise	-0.763197	-0.910641	0.0167276	0.000642949	-0.742194	-0.877083	0.0220233	0.00189715	-0.799331	-0.45843	0.00973437	0.214578	-0.192833	-0.906927	0.619135	0.000738667	-0.763975	-0.26968	0.0165499	0.482829	-0.748803	-0.4402	0.0202525	0.235712	0.0145639	-0.873896	0.970336	0.00206824	-0.633102	-0.842884	0.0672169	0.00432545	0.768736	-0.502281	0.0154886	0.168215	-0.749839	-0.00655545	0.0199838	0.986646	-0.114244	-0.385704	0.76978	0.305257	0.0036016	-0.499208	0.992663
CL5814.Contig2_DB	1	turquoise	0.453582	-0.528074	0.220092	0.143913	-0.184498	-0.556315	0.634643	0.119815	0.484318	-0.130379	0.18644	0.738127	-0.47755	-0.460242	0.193583	0.212538	0.532152	-0.349527	0.140272	0.356515	-0.160706	-0.084608	0.679577	0.828663	0.141148	-0.437509	0.717187	0.238923	0.385477	-0.582484	0.305567	0.0997988	0.151695	-0.319348	0.696834	0.402213	-0.146085	-0.214507	0.707639	0.57942	-0.564984	-0.413873	0.112939	0.268132	0.124079	-0.509121	0.750449
CL12685.Contig1_DB	1	turquoise	0.670104	0.715905	0.0482727	0.0300748	0.301619	0.707169	0.430243	0.033123	0.592921	0.294643	0.0924267	0.441504	-0.311973	0.718383	0.413769	0.0292447	0.62694	0.273256	0.0707623	0.476812	0.33893	0.373446	0.372264	0.322182	-0.0730379	0.687458	0.851868	0.0407219	-0.0484725	0.672648	0.901446	0.0471143	-0.384618	0.28791	0.306739	0.452494	0.303797	0.0276688	0.426754	0.94367	-0.337917	0.355586	0.373788	0.347657	-0.0693003	0.439185	0.859386
Unigene5758_DB	1	turquoise	-0.581001	0.933382	0.100874	0.000235313	0.0928037	0.914869	0.812294	0.000544923	-0.462452	0.288274	0.210062	0.451897	0.706161	0.912255	0.0334872	0.000604181	-0.531634	0.470834	0.140731	0.200821	0.0341258	0.524563	0.930547	0.147092	0.164362	0.923671	0.672611	0.000375217	0.273246	0.869229	0.47683	0.00233763	-0.0162075	0.179357	0.96699	0.644271	0.0762861	0.200751	0.845343	0.604519	0.68254	0.609919	0.0427783	0.081155	0.166748	0.607927	0.668076
CL26352.Contig1_DB	1	turquoise	0.922606	0.807351	0.000393444	0.00851033	0.450804	0.817734	0.223286	0.00708651	0.878501	0.285164	0.00182427	0.457009	-0.374759	0.775217	0.320348	0.0141182	0.888052	0.404039	0.00138308	0.28081	0.495177	0.207551	0.175295	0.592066	-0.460295	0.749508	0.212477	0.0200694	0.172132	0.824668	0.657878	0.00623169	-0.500929	0.429059	0.16955	0.249159	0.453137	0.190654	0.220602	0.623176	-0.375679	0.498682	0.319066	0.171782	-0.43713	0.593443	0.239377
CL15353.Contig2_DB	1	turquoise	0.821296	0.817137	0.00663804	0.00716367	0.222273	0.81463	0.565419	0.00749376	0.844052	0.365726	0.00421902	0.333077	-0.40993	0.802821	0.273178	0.00918805	0.866086	0.310219	0.00253217	0.41654	0.262295	0.3031	0.495351	0.427869	-0.196703	0.756211	0.611976	0.0183826	0.521402	0.809299	0.149989	0.00822971	-0.261344	0.500137	0.496974	0.170335	0.254747	0.0472481	0.508286	0.903926	-0.479012	0.39935	0.192027	0.286963	-0.196582	0.539433	0.612199
CL10072.Contig1_DB	1	turquoise	-0.753385	-0.518796	0.0190816	0.152401	-0.603494	-0.652856	0.0853097	0.0566102	-0.698441	0.434568	0.0363627	0.242459	0.022908	-0.405613	0.953353	0.27876	-0.703624	-0.82559	0.0344152	0.00612355	-0.613549	0.301436	0.0788639	0.430537	-0.103568	-0.381713	0.79089	0.310718	-0.071983	-0.727146	0.853989	0.0264302	0.682611	0.315451	0.0427485	0.4083	-0.590104	-0.734813	0.0943823	0.024119	0.0793785	-0.824868	0.839138	0.00620805	-0.111818	-0.890518	0.774566
CL6031.Contig2_DB	1	turquoise	0.882064	0.647853	0.00164977	0.0591881	0.172692	0.758998	0.656821	0.0177099	0.856965	-0.370725	0.00315933	0.326002	-0.564783	0.565795	0.113096	0.112309	0.895595	0.852789	0.00109179	0.0034792	0.216647	-0.243746	0.575551	0.527377	-0.160283	0.539558	0.680384	0.133798	0.308857	0.821687	0.418697	0.00658996	-0.23339	-0.341788	0.545599	0.367985	0.189878	0.704317	0.624617	0.0341601	-0.61914	0.851553	0.0754145	0.00357795	-0.143382	0.901639	0.712864
CL6441.Contig6_DB	1	turquoise	0.872468	0.979865	0.00214829	3.73997e-06	0.227974	0.925152	0.555221	0.000350853	0.862456	0.501174	0.00277036	0.169308	-0.443569	0.990092	0.231725	3.15748e-07	0.900393	0.31176	0.00093053	0.414106	0.25201	0.641782	0.51301	0.0624146	0.115863	0.996733	0.766591	6.54452e-09	0.352645	0.860605	0.351943	0.00289756	-0.300563	0.408916	0.431939	0.274484	0.238298	0.0158472	0.536932	0.967723	-0.543585	0.469563	0.130354	0.202207	0.127994	0.482092	0.742787
CL3540.Contig2_DB	1	turquoise	0.911442	-0.573727	0.000623491	0.106251	0.233622	-0.547533	0.545187	0.127029	0.874306	-0.399363	0.0020457	0.286945	-0.529739	-0.600857	0.142419	0.0870518	0.915234	-0.0322459	0.000536982	0.934366	0.280548	-0.334032	0.464643	0.379654	-0.0944455	-0.56191	0.809022	0.115349	0.29104	-0.494417	0.44737	0.176063	-0.306971	-0.436581	0.421691	0.240036	0.254441	0.129921	0.508813	0.739021	-0.590645	-0.105481	0.0940052	0.787099	-0.0869269	-0.214222	0.824025
CL4301.Contig2_DB	1	turquoise	0.934212	0.713656	0.000225394	0.0308413	0.236021	0.761927	0.540947	0.0170208	0.892101	-0.0164051	0.00122076	0.966587	-0.583388	0.655935	0.0991462	0.0550599	0.926719	0.66482	0.000326321	0.0507377	0.28752	0.190557	0.453133	0.623356	-0.344686	0.699895	0.363669	0.0358092	0.206346	0.761783	0.594266	0.0170544	-0.296163	-0.0392175	0.43904	0.920209	0.250109	0.509666	0.516301	0.161032	-0.607465	0.778312	0.0827265	0.0134935	-0.327456	0.691159	0.389682
Unigene39174_DB	1	turquoise	-0.862829	0.942885	0.00274518	0.000138613	-0.760442	0.975032	0.0173679	7.90349e-06	-0.82699	0.130632	0.00596191	0.737634	-0.0223776	0.907136	0.954432	0.000733047	-0.810162	0.6025	0.00810742	0.0859637	-0.796517	0.25384	0.0101903	0.50985	0.252741	0.888206	0.511747	0.00137668	-0.282911	0.966251	0.460729	2.24966e-05	0.822531	0.128835	0.00648717	0.741142	-0.765338	0.357715	0.0162412	0.34457	0.00784314	0.699262	0.984023	0.0360495	0.249108	0.762892	0.518037
CL4349.Contig1_DB	1	turquoise	-0.406089	0.854237	0.278141	0.00336587	-0.371522	0.771206	0.32488	0.0149563	-0.471032	0.624209	0.200605	0.0723704	-0.0402001	0.895842	0.918215	0.00108305	-0.421124	0.041485	0.258981	0.915609	-0.383859	0.671968	0.307775	0.0474221	0.715559	0.867581	0.0301919	0.00243829	-0.448903	0.693884	0.225487	0.0381326	0.312982	0.553193	0.412179	0.122351	-0.378191	-0.251349	0.315576	0.514153	-0.0835829	0.170442	0.830715	0.661075	0.688053	0.263987	0.0404776
CL21747.Contig2_DB	1	turquoise	-0.615236	0.437212	0.0778133	0.239279	-0.809803	0.428307	0.00815805	0.250081	-0.655047	0.103626	0.0555044	0.790775	-0.28722	0.410056	0.453627	0.273016	-0.584871	0.339829	0.0980824	0.370916	-0.840887	0.35249	0.00451172	0.35217	0.755329	0.491792	0.018599	0.178727	-0.507072	0.395204	0.163536	0.292459	0.786214	-0.0126901	0.0119833	0.974151	-0.823438	0.261535	0.00637785	0.496648	-0.321893	0.470316	0.39826	0.201385	0.748437	0.301338	0.020348
CL3188.Contig2_DB	1	turquoise	-0.736207	0.785144	0.0237136	0.0121807	-0.896609	0.759798	0.00105619	0.0175199	-0.752797	0.350936	0.0192292	0.354445	-0.337119	0.795079	0.374989	0.0104289	-0.706156	0.226543	0.033489	0.557775	-0.909327	0.382127	0.000675746	0.310149	0.131959	0.751285	0.735045	0.0196126	-0.502137	0.738095	0.168358	0.0231716	0.93148	0.35847	0.000259187	0.343479	-0.90218	-0.0321662	0.000874954	0.934528	-0.282255	0.308321	0.461815	0.419547	0.133592	0.436722	0.731864
CL7614.Contig2_DB	1	turquoise	-0.881705	0.366501	0.0016668	0.331975	-0.656104	0.355411	0.0549754	0.347911	-0.833496	0.00428459	0.00524859	0.991272	0.111368	0.333303	0.775455	0.380759	-0.82991	0.364995	0.00563411	0.334118	-0.687323	0.380429	0.0407776	0.312485	0.259641	0.402024	0.499883	0.283445	-0.152454	0.308137	0.695376	0.419838	0.723741	-0.222014	0.0275017	0.565885	-0.649321	0.252173	0.0584242	0.512727	0.137373	0.462675	0.724509	0.209813	0.244104	0.297996	0.526751
CL22915.Contig1_DB	1	turquoise	0.483237	0.821342	0.18757	0.0066324	0.207189	0.863706	0.592726	0.00268666	0.457415	0.12677	0.215727	0.745179	-0.155394	0.785303	0.689735	0.0121512	0.48283	0.564363	0.187998	0.113424	0.223505	0.172946	0.56321	0.656342	0.375076	0.760604	0.319905	0.0173299	0.268546	0.865331	0.484743	0.00258048	-0.271488	0.197845	0.479782	0.60987	0.220064	0.326317	0.56939	0.391431	-0.241941	0.643171	0.530535	0.0616671	0.374277	0.709883	0.321021
CL16792.Contig1_DB	1	turquoise	0.838417	0.83088	0.00474952	0.00552797	0.621993	0.717119	0.0736918	0.0296662	0.821737	0.702601	0.00658391	0.0347941	-0.0826347	0.889268	0.832613	0.00133285	0.814299	-0.0347145	0.00753808	0.929351	0.666478	0.834412	0.0499556	0.0051531	-0.356894	0.894459	0.34576	0.00113261	0.361897	0.610516	0.338547	0.0807755	-0.670297	0.533176	0.0481842	0.139366	0.646104	-0.318274	0.0601067	0.403887	-0.107887	0.12647	0.782335	0.745766	-0.366735	0.141326	0.331643
CL27342.Contig1_DB	1	turquoise	-0.455324	0.840701	0.218102	0.00452933	-0.0611908	0.803351	0.875732	0.00910687	-0.495048	0.308177	0.175426	0.419775	0.301712	0.853242	0.430094	0.00344341	-0.493677	0.355132	0.176811	0.348318	-0.0883515	0.573718	0.821179	0.106258	0.450431	0.886461	0.223717	0.00145079	-0.327062	0.73435	0.390286	0.0242544	0.0445508	0.107174	0.909392	0.783746	-0.0841914	0.129724	0.829497	0.739406	0.298922	0.499419	0.434581	0.171048	0.449322	0.437479	0.225001
CL25542.Contig1_DB	1	turquoise	-0.806188	0.821628	0.00868105	0.00659728	-0.721195	0.836791	0.0283212	0.00491064	-0.770699	0.0609755	0.0150645	0.876166	-0.0461716	0.78297	0.906107	0.0125887	-0.756428	0.611433	0.0183296	0.0801944	-0.739189	0.337724	0.0228613	0.374078	0.13151	0.798849	0.73592	0.00981142	-0.21833	0.808045	0.572512	0.0084097	0.776712	-0.0821052	0.0138141	0.833673	-0.717292	0.379232	0.0296085	0.314136	-0.0129909	0.712206	0.973539	0.0313421	0.123689	0.676243	0.751213
CL9566.Contig1_DB	1	turquoise	0.665204	0.868102	0.0505557	0.00240615	-0.17562	0.877037	0.651298	0.00189955	0.61355	0.257529	0.0788634	0.503504	-0.716928	0.846613	0.0297301	0.00399203	0.690225	0.500895	0.0395935	0.169584	-0.149728	0.324101	0.700619	0.394845	0.311661	0.85106	0.414261	0.00361791	0.0683209	0.86514	0.861358	0.00259276	0.0933577	0.288682	0.811189	0.451227	-0.165453	0.255272	0.670536	0.507382	-0.802271	0.620528	0.00927273	0.0745732	0.322315	0.630139	0.397606
CL3329.Contig1_DB	1	turquoise	0.649828	0.915851	0.0581617	0.00052377	-0.0471398	0.866556	0.904145	0.00250239	0.597605	0.46842	0.0892306	0.203458	-0.589709	0.912833	0.0946592	0.000590715	0.664038	0.321569	0.0511088	0.398761	-0.00164429	0.633505	0.99665	0.0669885	0.162434	0.93874	0.676282	0.000176405	0.108044	0.798485	0.782024	0.00986997	-0.040467	0.378564	0.917674	0.315061	-0.0187057	0.0662511	0.961904	0.865527	-0.662966	0.490163	0.051621	0.180393	0.147143	0.462037	0.705598
CL27768.Contig1_DB	1	turquoise	0.894483	0.528011	0.00113176	0.14397	0.705414	0.660462	0.0337587	0.0528296	0.893109	-0.424067	0.00118254	0.255315	-0.0444635	0.45525	0.909569	0.218187	0.867794	0.822925	0.00242512	0.0064395	0.746626	-0.314845	0.0208249	0.40925	-0.439135	0.442898	0.23698	0.232516	0.472727	0.728459	0.198766	0.0260244	-0.736539	-0.3554	0.0236176	0.347927	0.722145	0.725627	0.0280138	0.0269047	-0.0630291	0.82098	0.872022	0.00667697	-0.431483	0.838079	0.246199
CL7037.Contig1_DB	1	turquoise	0.978686	0.523112	4.55826e-06	0.148418	0.443767	0.461044	0.231491	0.211637	0.971598	0.437824	1.23654e-05	0.238545	-0.346942	0.53343	0.360327	0.139141	0.985304	0.0865889	1.24882e-06	0.824701	0.477699	0.482338	0.193425	0.188514	-0.20475	0.574934	0.597186	0.105347	0.416855	0.401362	0.264348	0.284314	-0.49863	0.38536	0.171834	0.305726	0.455796	-0.0527652	0.217564	0.892757	-0.408426	0.219722	0.275115	0.570004	-0.188467	0.145446	0.627242
CL11594.Contig3_DB	1	turquoise	0.474234	0.793248	0.197138	0.0107381	-0.0900434	0.858334	0.8178	0.00305901	0.498823	-0.128874	0.171641	0.741067	-0.407211	0.744881	0.276687	0.0212916	0.53351	0.73144	0.139071	0.0251186	-0.099271	0.0639925	0.79942	0.87008	0.145952	0.743277	0.707897	0.0217265	0.206695	0.882356	0.59363	0.00163598	0.063715	-0.168867	0.870639	0.664058	-0.0967304	0.536302	0.804473	0.136622	-0.485532	0.79483	0.185174	0.0104706	0.170817	0.803776	0.660365
Unigene36814_DB	1	turquoise	0.615358	0.651242	0.0777374	0.0574341	-0.124063	0.634027	0.75048	0.066694	0.511668	0.204409	0.159116	0.597809	-0.723761	0.644776	0.0274954	0.0608098	0.589128	0.392622	0.0950661	0.29591	-0.0754014	0.465875	0.847119	0.206261	0.00631699	0.685192	0.987132	0.0416614	-0.219341	0.580949	0.570691	0.100912	0.0302726	0.0465644	0.938376	0.905311	-0.116709	0.179893	0.764925	0.643265	-0.745524	0.512414	0.0211187	0.158406	0.0131174	0.415002	0.973281
Unigene4395_DB	1	turquoise	0.903804	0.854994	0.000826529	0.00330763	0.350071	0.801021	0.355715	0.00946709	0.91055	0.431385	0.000645188	0.246318	-0.340537	0.851841	0.369855	0.00355476	0.931533	0.292641	0.00025849	0.44476	0.372331	0.679621	0.323746	0.0440301	-0.0313048	0.879112	0.936279	0.0017935	0.42417	0.722787	0.255186	0.027807	-0.406073	0.282895	0.278163	0.460755	0.362703	0.0369825	0.337392	0.924746	-0.427002	0.454454	0.251685	0.219095	-0.0219174	0.41829	0.955368
Unigene36298_DB	1	turquoise	0.834875	-0.750225	0.00510535	0.0198843	0.163677	-0.654361	0.673914	0.0558488	0.830368	-0.673344	0.00558378	0.0468002	-0.537343	-0.773636	0.135715	0.0144448	0.857479	0.0102256	0.00312142	0.97917	0.218752	-0.770713	0.571752	0.0150615	-0.367254	-0.783655	0.330907	0.0124592	0.359819	-0.561318	0.341534	0.115817	-0.206842	-0.604838	0.59336	0.0844296	0.193727	0.261272	0.617478	0.497096	-0.572121	-0.154807	0.107461	0.690859	-0.365949	-0.170957	0.332759
CL1532.Contig3_DB	1	turquoise	-0.906256	0.49455	0.00075696	0.175928	-0.633394	0.570795	0.0670514	0.108466	-0.890733	-0.174183	0.00127406	0.654007	0.113083	0.431078	0.772069	0.246692	-0.881018	0.575546	0.00169976	0.104891	-0.664676	0.0198546	0.0508059	0.959566	0.183	0.42348	0.637443	0.256043	-0.381596	0.573817	0.310879	0.106184	0.691402	-0.177365	0.0391198	0.648013	-0.634527	0.45173	0.0664128	0.222219	0.167091	0.612104	0.667426	0.0797713	0.164864	0.626287	0.671656
CL5680.Contig1_DB	1	turquoise	0.578677	0.635437	0.102573	0.0659028	-0.337831	0.642405	0.373916	0.0620785	0.512129	0.0370574	0.158677	0.924594	-0.851407	0.613739	0.00358978	0.078745	0.600875	0.475995	0.0870397	0.195246	-0.295623	0.403317	0.439914	0.281752	0.139876	0.6624	0.719652	0.0518925	-0.0565884	0.596486	0.885026	0.089988	0.257633	-0.16812	0.503324	0.665474	-0.319948	0.313689	0.40128	0.411068	-0.905077	0.590413	0.000789867	0.0941666	0.144589	0.48305	0.710529
CL2543.Contig1_DB	1	turquoise	0.780974	0.78535	0.0129713	0.0121425	0.345917	0.832277	0.361844	0.00537756	0.718688	0.030058	0.0291435	0.938812	-0.378659	0.75825	0.314929	0.0178888	0.742182	0.558192	0.0220266	0.118305	0.412506	0.0818487	0.269875	0.834187	-0.358533	0.724026	0.343389	0.027411	0.126266	0.85762	0.746165	0.00311108	-0.418436	0.0794567	0.262354	0.838981	0.369768	0.337156	0.32735	0.374933	-0.386601	0.611007	0.304038	0.0804637	-0.365651	0.702875	0.333183
CL26002.Contig3_DB	1	turquoise	0.758374	0.854645	0.0178591	0.00333438	0.716245	0.922763	0.0299598	0.000390716	0.817641	-0.0750196	0.00709845	0.847886	0.123553	0.781376	0.751479	0.0128936	0.764834	0.771205	0.0163548	0.0149565	0.752832	0.129921	0.0192205	0.739022	-0.577211	0.7825	0.103654	0.0126781	0.719307	0.938256	0.0289393	0.000181236	-0.707875	-0.0693529	0.0328694	0.859281	0.741782	0.561507	0.0221372	0.115667	0.10517	0.858481	0.787714	0.0030484	-0.57057	0.872392	0.108638
CL16788.Contig1_DB	1	turquoise	-0.845601	0.827246	0.00408071	0.0059326	-0.816599	0.738603	0.00723357	0.0230272	-0.895824	0.555031	0.00108368	0.120854	-0.177182	0.859567	0.648358	0.00297062	-0.84851	0.160088	0.00382928	0.680757	-0.835082	0.778097	0.00508407	0.0135363	0.406698	0.905495	0.277352	0.000778106	-0.641983	0.63969	0.0623061	0.0635516	0.82814	0.349144	0.00583132	0.357078	-0.827436	-0.0880717	0.00591095	0.821738	-0.131979	0.339013	0.735007	0.37214	0.396829	0.254031	0.290299
Unigene3596_DB	1	turquoise	0.639791	0.693922	0.0634964	0.0381179	0.462298	0.725235	0.210234	0.0270282	0.665323	0.0177362	0.0504997	0.963878	-0.0927732	0.674362	0.812354	0.0463436	0.634	0.455465	0.0667097	0.217942	0.499651	0.0409399	0.170818	0.916714	-0.724798	0.636341	0.0271661	0.0653984	0.41243	0.752493	0.269972	0.0193061	-0.439817	0.0407489	0.236168	0.917102	0.485682	0.277344	0.185019	0.469974	-0.0537597	0.490426	0.890745	0.180123	-0.7183	0.594349	0.0292724
CL19022.Contig1_DB	1	turquoise	0.787959	-0.925967	0.0116658	0.000337951	0.729715	-0.87477	0.0256403	0.0020203	0.847395	-0.56865	0.00392434	0.110105	0.175011	-0.947734	0.652445	0.000102099	0.808151	-0.188069	0.00839436	0.627982	0.735161	-0.538735	0.0240173	0.134509	-0.183963	-0.917797	0.635642	0.000483513	0.626078	-0.826006	0.0712674	0.00607525	-0.750351	-0.599529	0.0198518	0.0879379	0.734785	0.1038	0.0241269	0.79043	0.0967574	-0.317843	0.804419	0.404558	-0.175933	-0.419833	0.65071
CL13064.Contig2_DB	1	turquoise	0.904906	-0.85817	0.000794749	0.00307092	0.532104	-0.838734	0.140314	0.00471849	0.947154	-0.361693	0.000106063	0.338839	-0.152968	-0.829917	0.69439	0.00563334	0.933949	-0.33699	0.000228502	0.375183	0.560993	-0.364284	0.116074	0.335132	-0.276269	-0.801045	0.471769	0.0094634	0.676554	-0.826477	0.0453699	0.00602078	-0.552391	-0.432108	0.123007	0.245439	0.556768	-0.0895893	0.119449	0.818707	-0.216202	-0.443795	0.576355	0.231458	-0.266491	-0.552713	0.488219
Unigene40298_DB	1	turquoise	-0.96893	0.750213	1.68862e-05	0.0198873	-0.613869	0.865714	0.0786641	0.00255586	-0.944652	-0.28874	0.000124389	0.451132	0.202409	0.653875	0.601475	0.0560939	-0.942126	0.882553	0.000145056	0.00162676	-0.655625	-0.149249	0.0552147	0.70154	0.294235	0.637407	0.442166	0.0648068	-0.360055	0.920582	0.341193	0.000429777	0.673528	-0.204345	0.0467176	0.597927	-0.623225	0.723025	0.0729552	0.0277306	0.243013	0.921293	0.528659	0.000416755	0.282411	0.969104	0.461555
Unigene29955_DB	1	turquoise	0.837533	-0.777163	0.00483672	0.0137233	0.286849	-0.823097	0.454237	0.00641875	0.834572	-0.0549961	0.00513652	0.888245	-0.426631	-0.759258	0.252143	0.0176479	0.844771	-0.534034	0.00415445	0.13861	0.328864	-0.0372358	0.387523	0.924231	-0.462747	-0.72031	0.209733	0.0286099	0.37441	-0.848036	0.320835	0.00386951	-0.306076	-0.124409	0.423117	0.749803	0.306863	-0.322107	0.421864	0.397928	-0.433921	-0.579756	0.243241	0.101783	-0.444272	-0.676746	0.230897
CL28168.Contig1_DB	1	turquoise	0.9377	-0.678045	0.000186912	0.0447154	0.407072	-0.597474	0.276867	0.0893194	0.960065	-0.702406	4.02976e-05	0.0348667	-0.322171	-0.721384	0.397828	0.02826	0.966221	0.103643	2.25651e-05	0.790742	0.438474	-0.629691	0.237769	0.0691653	-0.231794	-0.708219	0.548428	0.0327466	0.524498	-0.518471	0.147152	0.152704	-0.448624	-0.747864	0.225811	0.020498	0.422056	0.325906	0.257817	0.392063	-0.393236	-0.0370503	0.295088	0.924608	-0.215923	-0.105232	0.57686
CL296.Contig2_DB	1	turquoise	-0.624751	0.936226	0.0720495	0.000202558	-0.690851	0.96861	0.0393413	1.74981e-05	-0.635815	0.132174	0.0656915	0.734626	-0.116982	0.893327	0.764387	0.00117439	-0.58347	0.618977	0.0990875	0.0755137	-0.737182	0.242852	0.0234325	0.52894	0.820125	0.884717	0.00678329	0.0015276	-0.355457	0.963721	0.347845	2.89011e-05	0.683766	0.146567	0.0422598	0.706711	-0.705555	0.388088	0.0337073	0.302019	-0.166078	0.724203	0.669349	0.0273546	0.814922	0.767947	0.00745474
Unigene18654_DB	1	turquoise	0.91007	0.823838	0.000657052	0.00633008	0.393691	0.909741	0.294479	0.000665293	0.903683	-0.180082	0.000830077	0.64291	-0.373276	0.736366	0.322422	0.0236677	0.911039	0.838594	0.000633241	0.00473224	0.434934	0.0163299	0.242018	0.96674	-0.451015	0.729647	0.223043	0.025661	0.354076	0.940806	0.349855	0.000156766	-0.425627	-0.161878	0.253382	0.677342	0.410894	0.645953	0.27194	0.0601862	-0.390645	0.903326	0.298566	0.000840571	-0.438559	0.931036	0.237667
CL5358.Contig2_DB	1	turquoise	-0.828656	-0.831573	0.00577335	0.00545298	-0.542975	-0.857287	0.130872	0.00313553	-0.86966	-0.0641813	0.00231182	0.869699	0.122012	-0.786316	0.754502	0.0119645	-0.841927	-0.653944	0.00441405	0.0560594	-0.58501	-0.319781	0.0979829	0.40154	0.522991	-0.821796	0.148529	0.00657662	-0.651189	-0.83049	0.057461	0.00557042	0.546228	0.0408632	0.128123	0.91687	-0.569551	-0.449085	0.109415	0.225276	0.144655	-0.775812	0.710401	0.0139968	0.510852	-0.70078	0.159896
CL12506.Contig1_DB	1	turquoise	0.762362	0.52503	0.01692	0.146667	-0.0419942	0.357012	0.914576	0.345589	0.690527	0.824537	0.0394716	0.00624711	-0.704295	0.623464	0.0341682	0.072813	0.76384	-0.368524	0.0165806	0.329108	0.00328393	0.963196	0.99331	3.03757e-05	0.100792	0.666604	0.796398	0.0498966	0.0118304	0.216029	0.975902	0.576667	-0.0531916	0.567909	0.891894	0.110674	-0.025734	-0.571667	0.947604	0.107805	-0.767294	-0.197064	0.015805	0.61131	0.101247	-0.274641	0.795496
CL5684.Contig1_DB	1	turquoise	0.984423	0.703776	1.52966e-06	0.0343592	0.591964	0.824063	0.0930883	0.00630333	0.98821	-0.356265	5.79214e-07	0.346672	-0.208942	0.618248	0.589531	0.0759587	0.981451	0.883723	2.81056e-06	0.00157261	0.629746	-0.243518	0.0691334	0.527775	-0.359148	0.594745	0.3425	0.0911742	0.487658	0.890433	0.182971	0.00128593	-0.633027	-0.289694	0.0672594	0.449571	0.60793	0.737893	0.0824272	0.0232292	-0.25255	0.896757	0.512076	0.00105107	-0.347254	0.950417	0.359865
CL18083.Contig1_DB	1	turquoise	-0.60354	0.463138	0.0852795	0.209297	-0.492534	0.588661	0.177972	0.0953944	-0.515873	-0.403062	0.155135	0.282086	0.0966218	0.36889	0.804689	0.328591	-0.519058	0.74084	0.152158	0.0223985	-0.513622	-0.436073	0.157259	0.240646	0.147151	0.314738	0.705583	0.409419	0.19969	0.694179	0.606471	0.0380166	0.562843	-0.210237	0.114615	0.587172	-0.465732	0.634399	0.206418	0.0664852	0.0908225	0.699782	0.816245	0.0358522	0.12551	0.828802	0.747645
CL22847.Contig1_DB	1	turquoise	-0.458185	0.921058	0.214855	0.000421021	-0.0694981	0.916062	0.858988	0.00051928	-0.406999	0.270902	0.276961	0.48077	0.420569	0.883865	0.259675	0.00156614	-0.428543	0.517035	0.249792	0.154045	-0.143425	0.464483	0.71278	0.207802	0.552426	0.902633	0.122979	0.000861274	-0.0751961	0.877647	0.847532	0.00186793	0.0944035	0.218765	0.809105	0.571729	-0.111789	0.271703	0.774625	0.479422	0.368338	0.662017	0.32937	0.0520769	0.571322	0.646973	0.108067
Unigene34594_DB	1	turquoise	0.89201	0.857475	0.00122428	0.00312171	0.315743	0.936958	0.407843	0.000194676	0.849244	-0.122396	0.00376758	0.75375	-0.483524	0.778295	0.18727	0.0134969	0.868806	0.809311	0.00236322	0.00822792	0.363412	0.0547963	0.336377	0.888649	-0.417816	0.772834	0.263134	0.0146123	0.195175	0.959707	0.6148	4.15627e-05	-0.361163	-0.100349	0.3396	0.797278	0.324986	0.61367	0.39348	0.0787885	-0.485438	0.884896	0.185272	0.00151957	-0.39536	0.912266	0.292252
CL16357.Contig2_DB	1	turquoise	0.92755	0.705839	0.000313811	0.0336039	0.311461	0.776657	0.414576	0.0138252	0.856163	-0.0296775	0.00321912	0.939586	-0.507342	0.665083	0.163273	0.0506128	0.896865	0.565301	0.00104733	0.112693	0.356588	-0.13382	0.346203	0.73142	-0.135253	0.608457	0.72863	0.082089	0.0911225	0.829233	0.815646	0.00570899	-0.394371	0.13849	0.29357	0.722341	0.319755	0.385272	0.401579	0.305847	-0.543191	0.583104	0.130689	0.0993508	-0.124186	0.725715	0.750238
Unigene3557_DB	1	turquoise	0.958879	-0.480517	4.45931e-05	0.190433	0.58823	-0.339675	0.0956974	0.371146	0.989153	-0.836552	4.3304e-07	0.00493463	-0.141555	-0.549971	0.716399	0.125001	0.979753	0.384893	3.81228e-06	0.306364	0.617017	-0.831891	0.0767129	0.00541882	-0.208024	-0.554037	0.591203	0.121662	0.617394	-0.232381	0.0764815	0.547386	-0.628602	-0.782464	0.0697946	0.012685	0.607079	0.599204	0.0829756	0.088155	-0.219235	0.236686	0.570882	0.539774	-0.200279	0.207803	0.605389
CL19848.Contig1_DB	1	turquoise	0.77863	0.870233	0.0134305	0.00227775	0.242023	0.848334	0.530391	0.00384421	0.741537	0.25734	0.0222048	0.503828	-0.461312	0.860832	0.211337	0.00288176	0.762592	0.462894	0.0168669	0.209569	0.301448	0.463187	0.430518	0.209242	-0.371837	0.868632	0.324439	0.00237378	0.280052	0.810715	0.465466	0.00802965	-0.285199	0.129145	0.456952	0.740537	0.268124	0.185105	0.485456	0.633509	-0.466495	0.578531	0.205576	0.102681	-0.362529	0.567035	0.337641
CL20975.Contig2_DB	1	turquoise	0.899285	0.674169	0.000966163	0.04643	0.186602	0.672959	0.630716	0.0469737	0.833421	0.147581	0.00525645	0.704753	-0.613095	0.682575	0.079148	0.0427635	0.879985	0.323452	0.00175011	0.395847	0.238717	0.271901	0.536195	0.479089	-0.145834	0.650324	0.708125	0.0579058	0.127622	0.636739	0.743513	0.0651772	-0.26714	0.0404394	0.487121	0.91773	0.197531	0.114437	0.610449	0.769401	-0.651476	0.374314	0.0573139	0.320969	-0.128918	0.442957	0.74098
Unigene33000_DB	1	turquoise	0.906953	0.866328	0.000737968	0.00251678	0.200089	0.856547	0.605737	0.0031904	0.864356	0.24279	0.00264381	0.529049	-0.595826	0.848591	0.0904368	0.00382248	0.901849	0.497262	0.000885067	0.1732	0.251042	0.507522	0.514685	0.1631	-0.326393	0.890823	0.391314	0.00127049	0.17011	0.8057	0.661703	0.0087533	-0.263869	0.111609	0.492671	0.774979	0.212395	0.270395	0.583251	0.481624	-0.623168	0.650294	0.0729889	0.0579213	-0.310501	0.571241	0.416094
CL28177.Contig1_DB	1	turquoise	0.878888	0.792693	0.00180472	0.0108331	0.290168	0.834113	0.448795	0.00518414	0.891597	0.172372	0.00124021	0.657426	-0.409653	0.752709	0.273535	0.0192515	0.907333	0.5006	0.000727767	0.169875	0.336778	0.103939	0.375503	0.790155	-0.231469	0.715534	0.549004	0.0302003	0.53835	0.848274	0.134842	0.00384932	-0.330033	0.330048	0.385737	0.385715	0.322072	0.285921	0.397982	0.455763	-0.469616	0.572418	0.202149	0.107237	-0.227523	0.679443	0.556027
Unigene42051_DB	1	turquoise	-0.811586	0.405333	0.00790817	0.279124	-0.155209	0.315397	0.690089	0.408386	-0.752092	0.472115	0.0194073	0.199428	0.577714	0.415653	0.103283	0.26587	-0.793868	-0.0301009	0.0106328	0.938725	-0.211949	0.673033	0.58406	0.0469405	0.197867	0.492816	0.609829	0.177686	-0.167959	0.231943	0.665779	0.548163	0.223151	0.329882	0.563845	0.385968	-0.174212	-0.145123	0.653952	0.709498	0.603012	0.134647	0.0856261	0.72981	0.185214	-0.0101134	0.633306
CL28621.Contig1_DB	1	turquoise	0.873181	0.814165	0.00210805	0.00755606	0.225876	0.850783	0.558967	0.00364043	0.845339	0.155575	0.00410389	0.689388	-0.525368	0.755578	0.146359	0.0185376	0.877669	0.549336	0.00186681	0.125527	0.282356	0.20231	0.461647	0.601657	-0.320289	0.743568	0.400748	0.0216471	0.301171	0.849158	0.430962	0.00377479	-0.283926	0.254535	0.459051	0.508652	0.251924	0.3463	0.513159	0.361276	-0.559485	0.648975	0.117272	0.0586036	-0.314642	0.705378	0.40957
CL7446.Contig7_DB	1	turquoise	0.917258	0.606092	0.000494446	0.0836142	0.549364	0.631766	0.125504	0.0679756	0.902196	0.0119934	0.000874475	0.97557	-0.181656	0.597716	0.639959	0.0891556	0.907642	0.369448	0.000719521	0.327802	0.568918	0.0829105	0.109899	0.832061	-0.0640098	0.552	0.870045	0.123328	0.314315	0.622594	0.410083	0.0733315	-0.615311	-0.0414378	0.0777668	0.915704	0.546717	0.210397	0.127712	0.58688	-0.253924	0.388652	0.509705	0.301257	-0.0486284	0.492162	0.90113
Unigene31539_DB	1	turquoise	0.805069	0.545637	0.0088473	0.128619	0.264846	0.584394	0.49101	0.0984238	0.797982	0.0992872	0.00995124	0.799388	-0.404338	0.491008	0.280419	0.179528	0.814696	0.308849	0.0074849	0.41871	0.315355	-0.0430266	0.408451	0.912482	-0.211821	0.423015	0.584292	0.256621	0.43479	0.623815	0.242192	0.0726043	-0.31212	0.325266	0.413538	0.393049	0.29035	0.170897	0.448498	0.660214	-0.453342	0.329621	0.220367	0.386367	-0.203085	0.52653	0.600235
CL20559.Contig1_DB	1	turquoise	0.716902	0.763731	0.0297391	0.0166054	-0.0104676	0.688119	0.978678	0.0404506	0.731549	0.431679	0.025086	0.245961	-0.593844	0.803645	0.0917917	0.00906213	0.765136	0.174599	0.0162867	0.653222	0.0346832	0.661601	0.929415	0.0522776	-0.3505	0.818526	0.355085	0.00698501	0.35185	0.608328	0.353106	0.0821717	-0.0169125	0.20193	0.965554	0.602355	0.0184604	-0.0952798	0.962403	0.80736	-0.629762	0.300876	0.0691241	0.431436	-0.345329	0.269725	0.362715
CL23190.Contig1_DB	1	turquoise	0.337462	0.559635	0.374473	0.117153	-0.616185	0.503556	0.0772256	0.166963	0.262055	0.250361	0.49576	0.515863	-0.952491	0.591817	7.34539e-05	0.0931907	0.363361	0.169704	0.33645	0.662472	-0.579107	0.517447	0.102258	0.15366	0.170854	0.631418	0.660295	0.0681741	-0.247688	0.448158	0.520504	0.226353	0.550101	0.0128087	0.124894	0.97391	-0.601518	-0.00372432	0.0866131	0.992413	-0.981127	0.279858	2.98521e-06	0.465789	0.175223	0.197338	0.652046
CL27722.Contig1_DB	1	turquoise	0.768818	0.861712	0.0154705	0.00282101	0.780296	0.89206	0.013103	0.00122235	0.815068	0.140573	0.00743537	0.718302	0.220464	0.816895	0.56867	0.00719501	0.773377	0.600067	0.0144987	0.0875778	0.799412	0.270341	0.00972136	0.481714	-0.194502	0.816228	0.616045	0.0072822	0.62731	0.892162	0.0705458	0.00121845	-0.811227	0.170775	0.00795806	0.660444	0.79285	0.352247	0.0108061	0.352525	0.146696	0.706969	0.706462	0.0331953	-0.195552	0.728222	0.614103
CL15142.Contig1_DB	1	turquoise	0.774291	0.817247	0.0143088	0.00714944	0.260794	0.802943	0.497912	0.0091693	0.684194	0.335747	0.0420796	0.377059	-0.420623	0.783354	0.259607	0.012516	0.733516	0.38502	0.0245	0.30619	0.287646	0.361613	0.452926	0.338954	0.178296	0.784474	0.646264	0.0123054	-0.0984414	0.790354	0.801069	0.0112392	-0.368138	0.400016	0.329654	0.286084	0.249137	0.162744	0.517987	0.67569	-0.48338	0.509745	0.187421	0.160957	0.192721	0.546268	0.619341
CL4047.Contig8_DB	1	turquoise	-0.855327	-0.950076	0.00328222	8.71644e-05	-0.45173	-0.881823	0.222219	0.00166117	-0.81927	-0.573616	0.00689068	0.106335	0.288925	-0.968178	0.45083	1.83471e-05	-0.825623	-0.193028	0.00611973	0.618773	-0.479588	-0.636696	0.191417	0.0652011	0.254954	-0.952002	0.50793	7.61004e-05	-0.160628	-0.81778	0.679725	0.00708063	0.509119	-0.521001	0.161558	0.150358	-0.439087	0.104003	0.237037	0.790027	0.31856	-0.336703	0.403441	0.375615	0.222715	-0.408025	0.564628
CL145.Contig1_DB	1	turquoise	-0.667281	-0.815476	0.0495797	0.00738121	-0.207125	-0.87888	0.592844	0.00180513	-0.659732	0.0343458	0.053185	0.9301	0.386735	-0.740384	0.303856	0.0225257	-0.669451	-0.687246	0.0485731	0.0408094	-0.259321	-0.110681	0.500432	0.776813	0.56122	-0.72077	0.115895	0.0284595	-0.264812	-0.8901	0.491069	0.00129925	0.218687	-0.00948286	0.571869	0.980683	-0.24101	-0.485924	0.532168	0.184767	0.366058	-0.759963	0.332605	0.017481	0.56931	-0.824808	0.1096
CL6652.Contig4_DB	1	turquoise	-0.5988	0.913231	0.088426	0.000581564	-0.570659	0.822055	0.10857	0.00654505	-0.516992	0.64627	0.154085	0.0600191	0.0472634	0.949505	0.903895	9.06543e-05	-0.50645	0.109325	0.164139	0.779491	-0.60866	0.786265	0.081959	0.0119737	0.476987	0.960204	0.194184	3.98142e-05	0.140755	0.729051	0.717948	0.0258429	0.621222	0.515648	0.0741551	0.155346	-0.557048	-0.180861	0.119224	0.64145	2.15203e-05	0.280537	0.999956	0.464661	0.460467	0.28731	0.212284
CL7132.Contig2_DB	1	turquoise	0.755171	0.785424	0.0186379	0.0121288	0.0253576	0.785166	0.94837	0.0121765	0.710357	0.0696002	0.0319883	0.858783	-0.595224	0.751691	0.0908471	0.0195091	0.768605	0.556888	0.0155171	0.119353	0.0469299	0.379691	0.90457	0.313503	0.103439	0.773728	0.791145	0.0144257	0.0538631	0.750363	0.890536	0.0198485	-0.100165	-0.119197	0.797645	0.76003	0.0273512	0.335776	0.944315	0.377015	-0.662742	0.658842	0.0517282	0.0536209	0.116554	0.61078	0.765229
CL1345.Contig1_DB	1	turquoise	0.865208	0.716533	0.00258838	0.029863	0.0629306	0.715733	0.872221	0.0301328	0.812369	0.176277	0.00780013	0.650061	-0.671148	0.688947	0.0477953	0.0401123	0.871697	0.475533	0.00219234	0.195741	0.104566	0.382608	0.788911	0.309489	0.0124235	0.71113	0.974694	0.0317171	0.132392	0.683989	0.734202	0.0421658	-0.147837	0.0933803	0.70426	0.811144	0.0732629	0.246097	0.851416	0.523274	-0.737634	0.585392	0.0233031	0.0977097	0.0265203	0.536952	0.946005
CL4987.Contig2_DB	1	turquoise	-0.726733	-0.649245	0.0265588	0.0584637	-0.203594	-0.50572	0.599302	0.164849	-0.759403	-0.822542	0.0176135	0.00648589	0.40561	-0.712053	0.278764	0.0313951	-0.760503	0.29099	0.0173535	0.447453	-0.258742	-0.78165	0.501423	0.0128409	0.648958	-0.6981	0.0586125	0.0364931	-0.499953	-0.417382	0.170517	0.263682	0.203096	-0.765494	0.600216	0.016206	-0.241006	0.533307	0.532175	0.13925	0.405257	0.150194	0.279222	0.69972	0.644929	0.0715198	0.0607286
Unigene4370_DB	1	turquoise	0.87223	0.848833	0.00216182	0.00380206	0.412929	0.871541	0.269336	0.00220135	0.914444	0.0899096	0.000554267	0.818067	-0.229179	0.828295	0.553076	0.00581382	0.915688	0.567573	0.000527234	0.110933	0.441354	0.305792	0.234341	0.423569	-0.161165	0.842658	0.678701	0.00434629	0.615594	0.844188	0.0775915	0.0042068	-0.447683	-0.0148773	0.226906	0.969698	0.438928	0.365277	0.237227	0.333716	-0.313553	0.675712	0.411281	0.0457422	-0.161307	0.653464	0.67843
CL9802.Contig1_DB	1	turquoise	0.938262	-0.950754	0.00018118	8.31506e-05	0.605298	-0.885046	0.0841297	0.00151288	0.891063	-0.550196	0.00126105	0.124814	-0.21609	-0.959197	0.576556	4.34132e-05	0.892732	-0.230523	0.00119672	0.550684	0.650253	-0.657493	0.0579427	0.0542853	-0.298736	-0.95405	0.434881	6.54585e-05	0.254242	-0.822208	0.509157	0.00652634	-0.670957	-0.487584	0.0478822	0.183047	0.611321	0.0651708	0.0802653	0.867704	-0.241255	-0.383715	0.531738	0.307973	-0.284596	-0.432633	0.457946
Unigene31618_DB	1	turquoise	0.918149	0.698139	0.000476478	0.0364784	0.493354	0.803553	0.177139	0.00907607	0.934602	-0.257258	0.000220839	0.503969	-0.24274	0.616832	0.529137	0.0768269	0.93036	0.838501	0.000274008	0.00474133	0.530787	-0.0969932	0.141484	0.80395	-0.384622	0.627977	0.306734	0.0701575	0.504754	0.837849	0.165791	0.00480538	-0.521756	-0.221309	0.149663	0.56715	0.516966	0.711413	0.15411	0.0316183	-0.281334	0.896024	0.46334	0.00107662	-0.38023	0.87305	0.312759
Unigene39885_DB	1	turquoise	-0.674677	-0.700723	0.0462028	0.0354968	-0.523966	-0.815173	0.147637	0.00742139	-0.681066	0.303666	0.0434076	0.426964	-0.0399815	-0.603604	0.918659	0.085237	-0.677484	-0.833659	0.0449609	0.00523155	-0.537809	0.205676	0.135311	0.595492	-0.213494	-0.566903	0.581257	0.111451	-0.450472	-0.882526	0.22367	0.00162803	0.580492	0.191529	0.101245	0.621552	-0.539822	-0.673131	0.13357	0.0468961	0.0558986	-0.848033	0.88642	0.0038698	-0.202525	-0.94383	0.601263
CL619.Contig3_DB	1	turquoise	0.399493	0.803421	0.286773	0.00909622	-0.0743548	0.719598	0.849222	0.0288434	0.386009	0.722927	0.304842	0.0277622	-0.45013	0.84062	0.224066	0.00453697	0.410534	-0.0423156	0.272401	0.913924	-0.0296824	0.623847	0.939576	0.0725853	-0.397133	0.814827	0.289895	0.00746741	0.0767363	0.656045	0.844439	0.0550051	0.0628771	0.788171	0.872329	0.0116276	-0.0460147	-0.302603	0.906425	0.428665	-0.429384	0.0993683	0.248761	0.799227	-0.409598	0.20479	0.273605
Unigene1147_DB	1	turquoise	0.792454	-0.433389	0.0108742	0.243885	0.855904	-0.401681	0.00323856	0.283895	0.863751	-0.380374	0.00268366	0.312561	0.3035	-0.457732	0.427229	0.215367	0.807191	0.0842301	0.00853364	0.829419	0.86115	-0.116501	0.0028597	0.765334	-0.227512	-0.392674	0.556045	0.29584	0.762476	-0.41034	0.0168938	0.272651	-0.860365	-0.558324	0.00291431	0.1182	0.86687	0.21006	0.0024826	0.587493	0.233367	0.0547737	0.545639	0.888695	-0.218965	-0.133834	0.571369
CL21052.Contig1_DB	1	turquoise	0.969755	0.956181	1.53817e-05	5.55513e-05	0.573857	0.930046	0.106153	0.000278271	0.967954	0.396253	1.87995e-05	0.291064	-0.192524	0.949473	0.619706	9.08505e-05	0.970175	0.349498	1.46516e-05	0.356558	0.603711	0.460835	0.0851669	0.211871	-0.120946	0.918449	0.756595	0.000470543	0.478301	0.895963	0.192783	0.00107879	-0.633459	0.390025	0.0670148	0.299402	0.584789	0.0630844	0.0981408	0.871911	-0.26839	0.464843	0.485007	0.207402	-0.108198	0.568374	0.781721
CL20388.Contig1_DB	1	turquoise	0.916869	0.852028	0.000502434	0.00353974	0.315202	0.930431	0.408691	0.000273052	0.886277	-0.162099	0.00145875	0.67692	-0.424446	0.779334	0.254844	0.0132914	0.918977	0.834577	0.000460202	0.00513599	0.339044	0.0547469	0.372093	0.888749	0.0595139	0.776206	0.879116	0.0139166	0.280141	0.951594	0.465318	7.83533e-05	-0.387315	-0.190906	0.303068	0.622707	0.317746	0.6289	0.40471	0.0696219	-0.502977	0.902215	0.167531	0.000873901	0.0803587	0.913481	0.837173
CL10386.Contig2_DB	1	turquoise	0.70239	-0.50323	0.0348727	0.167282	0.135813	-0.482229	0.727542	0.188628	0.76208	-0.365801	0.0169852	0.33297	-0.35326	-0.522919	0.351045	0.148595	0.772295	-0.0156825	0.0147256	0.968058	0.154402	-0.114078	0.691638	0.770109	-0.0934576	-0.455559	0.81099	0.217835	0.602546	-0.505183	0.0859336	0.165372	-0.148479	-0.565885	0.703024	0.112239	0.159041	0.162529	0.682756	0.676102	-0.43545	-0.046951	0.241396	0.904528	-0.0829852	-0.235273	0.831911
CL4289.Contig2_DB	1	turquoise	0.905733	-0.570493	0.000771462	0.108696	0.395804	-0.510788	0.29166	0.159957	0.905588	-0.562758	0.000775493	0.114682	-0.317798	-0.627812	0.404629	0.0702533	0.92294	0.149993	0.000387654	0.700108	0.428503	-0.345528	0.249841	0.362421	-0.128254	-0.566819	0.742278	0.111515	0.439297	-0.477937	0.236787	0.19317	-0.451561	-0.6725	0.222414	0.0471809	0.414103	0.34118	0.267839	0.368893	-0.389978	0.0849316	0.299465	0.828015	-0.120821	-0.0878857	0.756841
CL9113.Contig2_DB	1	turquoise	0.623691	0.900666	0.0726778	0.000921895	0.707979	0.910397	0.0328322	0.000648955	0.69662	0.220236	0.0370636	0.56908	0.329463	0.86273	0.386607	0.00275187	0.653679	0.542504	0.0561929	0.131273	0.691426	0.317853	0.0391101	0.404543	0.0733306	0.870475	0.85128	0.00226347	0.646172	0.900165	0.0600707	0.000937788	-0.725189	0.235103	0.0270428	0.542568	0.704383	0.314797	0.0341359	0.409327	0.225755	0.66652	0.559182	0.049936	0.085791	0.67816	0.826296
CL7974.Contig4_DB	1	turquoise	0.443316	0.535897	0.232023	0.136976	0.217128	0.402896	0.574681	0.282302	0.453739	0.7623	0.219913	0.0169345	-0.0659105	0.581491	0.866213	0.100518	0.467766	-0.251367	0.204177	0.514123	0.21768	0.861092	0.573686	0.00286368	0.411369	0.613081	0.271331	0.0791569	0.40592	0.291374	0.278361	0.446825	-0.261373	0.655061	0.496924	0.0554971	0.227545	-0.450106	0.555987	0.224094	-0.167782	-0.079806	0.666114	0.838281	0.416715	-0.110447	0.264525
CL18366.Contig1_DB	1	turquoise	-0.629911	0.804846	0.0690383	0.00888079	-0.14275	0.784414	0.714086	0.0123167	-0.533199	0.25851	0.139345	0.50182	0.471075	0.781772	0.200558	0.0128174	-0.580475	0.44002	0.101257	0.235926	-0.176337	0.481961	0.649949	0.18891	0.155344	0.805412	0.68983	0.00879612	0.284718	0.73135	0.457745	0.0251458	0.22312	0.133175	0.563901	0.732676	-0.133711	0.20666	0.731633	0.593692	0.469513	0.569048	0.202262	0.1098	0.14631	0.525005	0.707205
CL6093.Contig1_DB	1	turquoise	0.917748	0.6065	0.000484498	0.0833498	0.736344	0.46366	0.023674	0.208716	0.901091	0.780538	0.00090855	0.0130558	-0.00732187	0.695099	0.985085	0.0376556	0.886228	-0.282005	0.00146091	0.462228	0.756214	0.748458	0.0183817	0.0203425	-0.139931	0.681498	0.719545	0.0432223	0.357526	0.37252	0.344844	0.323481	-0.794046	0.662895	0.0106027	0.0516548	0.732784	-0.542062	0.0247171	0.13165	-0.0629963	-0.161988	0.872089	0.677132	-0.123854	-0.1117	0.75089
CL6768.Contig2_DB	1	turquoise	0.874126	0.776432	0.00205555	0.0138708	0.374145	0.644275	0.321205	0.0610766	0.859848	0.764331	0.00295072	0.0164688	-0.369879	0.837622	0.327194	0.00482783	0.869091	-0.0842468	0.00234599	0.829386	0.415355	0.901036	0.266248	0.000910261	-0.363319	0.869675	0.33651	0.00231092	0.372416	0.529262	0.323626	0.142846	-0.408742	0.580916	0.274708	0.100936	0.389263	-0.352226	0.30043	0.352556	-0.390901	0.0991461	0.298222	0.799668	-0.342043	0.053152	0.367604
CL8757.Contig1_DB	1	turquoise	0.963081	0.656634	3.0707e-05	0.0547114	0.654703	0.591967	0.0556768	0.0930864	0.938832	0.544055	0.000175496	0.129955	-0.155583	0.669109	0.689374	0.0487311	0.93319	-0.0113877	0.000237648	0.976804	0.694102	0.490251	0.0380468	0.180303	-0.292421	0.633749	0.445119	0.0668508	0.370258	0.531944	0.32666	0.140456	-0.71322	0.575825	0.0309914	0.104683	0.662868	-0.217784	0.0516677	0.573498	-0.19524	0.0893162	0.614679	0.819252	-0.278832	0.206239	0.467495
CL6783.Contig2_DB	1	turquoise	-0.413733	-0.558539	0.26831	0.118027	-0.331465	-0.485106	0.383553	0.185619	-0.302823	-0.549693	0.428312	0.125231	0.154234	-0.60699	0.691958	0.0830328	-0.317066	0.0124769	0.405772	0.974586	-0.372695	-0.605645	0.323235	0.0839044	0.259733	-0.626143	0.499726	0.0712293	0.277766	-0.405701	0.46927	0.278645	0.391936	-0.476739	0.296831	0.194449	-0.324804	0.227475	0.393759	0.556113	0.105042	-0.116875	0.787968	0.764599	0.250778	-0.0801315	0.515141
CL3054.Contig1_DB	1	turquoise	0.938556	-0.444338	0.000178235	0.23082	0.327246	-0.454872	0.390004	0.218618	0.893423	-0.150327	0.0011708	0.699465	-0.511435	-0.43705	0.159339	0.239474	0.9183	-0.145824	0.000473479	0.708144	0.386347	-0.0381281	0.304383	0.92242	-0.448671	-0.402424	0.225757	0.282921	0.212309	-0.461732	0.583407	0.210866	-0.385247	-0.257638	0.30588	0.503316	0.345671	-0.073121	0.362209	0.851701	-0.52077	-0.182641	0.150572	0.638115	-0.438129	-0.294816	0.238181
CL7973.Contig2_DB	1	turquoise	0.665398	0.904964	0.0504639	0.00079309	0.210403	0.845793	0.586869	0.00406379	0.686134	0.446048	0.0412693	0.228815	-0.357192	0.919521	0.345328	0.000449722	0.680477	0.272171	0.0436606	0.478634	0.239057	0.616486	0.535597	0.0770401	-0.544202	0.927565	0.129831	0.0003136	0.333307	0.774054	0.380753	0.0143579	-0.203484	0.29606	0.599505	0.439207	0.215351	0.0106767	0.577893	0.978252	-0.348441	0.414864	0.358114	0.266871	-0.511426	0.418488	0.159348
CL689.Contig1_DB	1	turquoise	-0.476387	0.70417	0.194826	0.034214	0.246018	0.605489	0.523411	0.0840057	-0.441191	0.608329	0.234535	0.0821711	0.599889	0.736724	0.0876969	0.0235642	-0.511663	-0.0101685	0.159121	0.979287	0.24073	0.812711	0.532659	0.00775326	-0.481126	0.766471	0.18979	0.0159876	-0.020555	0.501159	0.95814	0.169323	-0.173858	0.44479	0.65462	0.230289	0.246261	-0.238957	0.522988	0.535774	0.697356	0.159247	0.0367793	0.682362	-0.491877	0.124602	0.178641
CL25099.Contig1_DB	1	turquoise	0.691616	0.478118	0.0390342	0.192978	-0.0437597	0.383656	0.910996	0.308053	0.664645	0.480925	0.0508203	0.190002	-0.571277	0.503829	0.1081	0.166695	0.726458	-0.107178	0.0266445	0.783739	-0.0197624	0.457632	0.959754	0.21548	0.353509	0.486317	0.350681	0.184359	0.235081	0.33959	0.542608	0.371274	-0.039014	0.423632	0.920622	0.255855	-0.0309033	-0.279396	0.937094	0.466557	-0.68181	-0.029433	0.0430892	0.940083	0.361335	0.0396198	0.339353
CL12411.Contig2_DB	1	turquoise	0.946307	0.904745	0.000112033	0.000799329	0.294258	0.902125	0.44213	0.00087664	0.933409	0.160046	0.000234977	0.680837	-0.474206	0.876998	0.197168	0.00190161	0.962923	0.561378	3.11626e-05	0.11577	0.338066	0.445146	0.373563	0.22987	-0.167198	0.894629	0.667223	0.00112643	0.38632	0.86047	0.30442	0.00290698	-0.356419	0.00127284	0.346448	0.997407	0.316907	0.312332	0.406021	0.413203	-0.539709	0.684644	0.133668	0.0418908	-0.162224	0.655625	0.676682
Unigene41373_DB	1	turquoise	-0.658713	0.579055	0.0536839	0.102296	-0.148333	0.45183	0.703305	0.222104	-0.567261	0.621543	0.111174	0.0739619	0.478064	0.63788	0.193035	0.0645459	-0.609421	-0.126454	0.0814725	0.745799	-0.181278	0.886916	0.640668	0.00143121	0.0294058	0.68481	0.940138	0.0418213	0.169222	0.323898	0.663384	0.395157	0.22543	0.339372	0.559765	0.3716	-0.139765	-0.337697	0.719868	0.374118	0.490711	0.0372481	0.179832	0.924206	0.0134477	-0.0548903	0.972609
CL23720.Contig4_DB	1	turquoise	0.738438	0.808169	0.0230739	0.00839175	0.266978	0.769536	0.487395	0.0153148	0.753329	0.492061	0.0190958	0.178454	-0.272843	0.810243	0.477505	0.00809596	0.7729	0.164004	0.0145984	0.673291	0.271425	0.40476	0.479889	0.27987	0.0373559	0.761245	0.923988	0.0171795	0.331821	0.753881	0.383012	0.0189578	-0.309415	0.606061	0.417813	0.0836344	0.271145	-0.107796	0.48036	0.782515	-0.353982	0.261413	0.349991	0.496856	0.0478058	0.415858	0.902796
CL9290.Contig2_DB	1	turquoise	-0.930356	0.741186	0.000274065	0.0223023	-0.337426	0.651974	0.374527	0.0570595	-0.909572	0.705949	0.000669562	0.0335641	0.428553	0.796804	0.249779	0.0101432	-0.932806	-0.101987	0.000242367	0.794026	-0.37769	0.57826	0.316271	0.102881	0.124417	0.74796	0.749786	0.0204728	-0.376332	0.592174	0.318157	0.0929429	0.397746	0.749718	0.289083	0.0200148	-0.353031	-0.384134	0.35138	0.3074	0.48917	0.00387511	0.181413	0.992106	0.110097	0.145351	0.777966
CL8851.Contig1_DB	1	turquoise	0.453417	0.364014	0.220281	0.335516	-0.0198578	0.270991	0.959559	0.480619	0.530757	0.322903	0.141511	0.396695	-0.305693	0.425606	0.423727	0.253408	0.540706	-0.0211084	0.132811	0.957014	0.0053261	0.58826	0.98915	0.0956761	-0.247486	0.476189	0.520855	0.195037	0.582853	0.185211	0.0995322	0.633311	0.0342947	-0.00137979	0.930204	0.997189	0.0250089	-0.177152	0.949079	0.648414	-0.355889	0.0754574	0.347217	0.847007	-0.262356	-0.0578552	0.495247
CL2346.Contig2_DB	1	turquoise	0.918144	-0.946094	0.000476587	0.000113574	0.483263	-0.876931	0.187543	0.00190509	0.94949	-0.594686	9.07507e-05	0.0912145	-0.227853	-0.962932	0.555438	3.11357e-05	0.94477	-0.189744	0.000123482	0.624868	0.520669	-0.664582	0.150666	0.0508502	-0.307965	-0.954326	0.420112	6.41101e-05	0.626389	-0.807025	0.0710846	0.0085579	-0.510283	-0.545536	0.160441	0.128704	0.513331	0.104821	0.157535	0.788406	-0.285291	-0.343532	0.4568	0.365386	-0.305216	-0.397952	0.424487
CL16136.Contig1_DB	1	turquoise	0.697274	0.748356	0.0368109	0.0203692	0.505657	0.836376	0.164909	0.00495237	0.805096	-0.202836	0.00884334	0.600692	0.0674122	0.662776	0.863188	0.0517121	0.768012	0.835429	0.0156468	0.00504853	0.514934	0.0363205	0.15602	0.92609	-0.210188	0.688008	0.587261	0.0404963	0.90455	0.858038	0.000804916	0.00308054	-0.489331	-0.21163	0.181247	0.58464	0.534562	0.68552	0.138145	0.0415247	-0.0171851	0.918981	0.964999	0.000460132	-0.203976	0.871241	0.598602
CL3563.Contig15_DB	1	turquoise	0.92697	-0.637564	0.000322514	0.0647205	0.339599	-0.585829	0.37126	0.0973984	0.933257	-0.242554	0.00023683	0.529462	-0.416581	-0.640557	0.264695	0.0630786	0.945728	-0.2595	0.000116256	0.500126	0.377266	-0.441558	0.316859	0.2341	-0.366662	-0.656306	0.331747	0.0548745	0.425122	-0.558285	0.254006	0.118231	-0.37383	-0.0795046	0.321646	0.838885	0.356692	-0.0444149	0.346052	0.909667	-0.455939	-0.353895	0.217402	0.350118	-0.349954	-0.33191	0.355887
CL734.Contig1_DB	1	turquoise	0.884202	0.942032	0.00155079	0.000145867	0.765983	0.903405	0.0160964	0.000838239	0.934242	0.447332	0.000225037	0.227315	0.100413	0.942831	0.797151	0.000139059	0.894965	0.309128	0.00111429	0.418267	0.792839	0.517244	0.010808	0.15385	-0.337522	0.934276	0.374381	0.000224635	0.721163	0.854678	0.0283317	0.00333185	-0.784453	0.416258	0.0123094	0.265103	0.786018	0.0495808	0.0120193	0.899202	0.0408083	0.446905	0.916981	0.227812	-0.330763	0.50114	0.384623
CL19699.Contig1_DB	1	turquoise	0.985173	0.867253	1.28815e-06	0.00245864	0.446628	0.853282	0.228137	0.00344032	0.956506	0.343907	5.41398e-05	0.364827	-0.395556	0.862185	0.291991	0.00278871	0.971532	0.329465	1.24651e-05	0.386605	0.495682	0.296358	0.174787	0.438724	-0.358828	0.817611	0.342961	0.00710228	0.320589	0.838906	0.400282	0.00470173	-0.505624	0.396769	0.164942	0.290378	0.46145	0.0777385	0.211182	0.842428	-0.428718	0.413108	0.249576	0.269107	-0.345796	0.541381	0.362022
Unigene39041_DB	1	turquoise	0.904108	0.953984	0.000817672	6.57849e-05	0.746639	0.967939	0.0208214	1.88292e-05	0.938922	0.200785	0.000174603	0.604458	0.0586755	0.919487	0.88081	0.000450377	0.905595	0.563747	0.000775293	0.113905	0.762382	0.37043	0.0169154	0.326417	-0.234416	0.910879	0.543782	0.000637135	0.611169	0.941021	0.0803612	0.000154814	-0.773971	0.162677	0.0143751	0.675819	0.750114	0.30297	0.0199127	0.428078	-0.00607859	0.67943	0.987617	0.0441125	-0.213592	0.720317	0.581078
CL20660.Contig1_DB	1	turquoise	0.940066	0.646349	0.000163612	0.0599777	0.335684	0.575474	0.377153	0.104944	0.920387	0.571625	0.000433392	0.107837	-0.427538	0.674839	0.251026	0.0461307	0.947756	-0.0986566	0.000101954	0.800641	0.370726	0.477407	0.326	0.193736	-0.07995	0.620023	0.837992	0.0748788	0.346943	0.522544	0.360326	0.148938	-0.405363	0.620636	0.279085	0.0745083	0.344551	-0.309418	0.36387	0.417807	-0.5019	-0.0122689	0.168591	0.975009	-0.0617792	0.155831	0.874544
CL5004.Contig2_DB	1	turquoise	-0.617891	0.744534	0.0761768	0.0213852	-0.696877	0.820429	0.0369642	0.00674532	-0.650865	-0.193838	0.0576273	0.617273	-0.205532	0.655388	0.595755	0.055333	-0.603177	0.819465	0.0855175	0.00686604	-0.727188	0.0826525	0.0264174	0.832577	0.395383	0.684698	0.292222	0.0418679	-0.595437	0.837274	0.0907017	0.00486244	0.69495	-0.237379	0.0377139	0.538551	-0.720878	0.666294	0.0284244	0.050042	-0.193466	0.906612	0.617962	0.000747217	0.394601	0.851622	0.293264
Unigene3980_DB	1	turquoise	0.804345	-0.770677	0.00895606	0.0150692	0.859781	-0.710397	0.0029554	0.0319744	0.804982	-0.346956	0.00886034	0.360306	0.213893	-0.785312	0.580534	0.0121495	0.765089	-0.260797	0.0162971	0.497907	0.873157	-0.526472	0.00210942	0.145358	-0.242619	-0.791439	0.529348	0.0110495	0.373833	-0.655966	0.321641	0.0550444	-0.899177	-0.166102	0.000969708	0.669303	0.852551	-0.0109509	0.00349807	0.977693	0.174871	-0.369622	0.652709	0.327557	-0.229738	-0.363992	0.552081
CL1084.Contig3_DB	1	turquoise	0.579356	0.747998	0.102075	0.0204629	0.0339093	0.663928	0.930987	0.051161	0.627341	0.574194	0.0705279	0.105901	-0.428537	0.791225	0.249799	0.0110868	0.63232	0.0376838	0.0676603	0.923322	0.0745184	0.535628	0.848893	0.137211	-0.520473	0.780294	0.150847	0.0131034	0.482271	0.621892	0.188584	0.0737521	-0.0163413	0.545905	0.966717	0.128394	0.0697541	-0.213024	0.858473	0.582108	-0.432478	0.155797	0.244989	0.688963	-0.516619	0.210907	0.154435
Unigene39840_DB	1	turquoise	0.824811	-0.736348	0.00621475	0.0236727	0.459132	-0.628151	0.213786	0.0700561	0.887144	-0.55288	0.00142147	0.122606	-0.1725	-0.76886	0.657183	0.0154615	0.865112	-0.0503689	0.00259463	0.897606	0.500343	-0.796029	0.170131	0.010271	-0.506797	-0.79889	0.163801	0.00980491	0.72098	-0.534176	0.0283911	0.138484	-0.460245	-0.321804	0.212534	0.398397	0.491985	0.200806	0.178531	0.604418	-0.213043	-0.206586	0.582074	0.593829	-0.500456	-0.162705	0.170019
CL11190.Contig1_DB	1	turquoise	0.702428	-0.740345	0.0348586	0.0225367	0.520125	-0.648467	0.151168	0.0588682	0.724878	-0.627505	0.0271408	0.0704324	-0.0245528	-0.771889	0.950007	0.0148113	0.709848	-0.0133699	0.032168	0.972767	0.542404	-0.769378	0.131359	0.015349	-0.322964	-0.78425	0.396602	0.0123473	0.370008	-0.559352	0.327013	0.117378	-0.546288	-0.524731	0.128072	0.146939	0.534559	0.249835	0.138148	0.516776	-0.0610722	-0.172268	0.875971	0.657622	-0.329768	-0.176088	0.386143
CL13183.Contig1_DB	1	turquoise	0.930918	0.737719	0.000266554	0.0232788	0.728196	0.594841	0.0261056	0.0911087	0.938554	0.813799	0.000178246	0.00760532	-0.0429824	0.813174	0.912572	0.00769016	0.911022	-0.216185	0.000633647	0.576385	0.766671	0.833587	0.0159431	0.00523911	-0.480971	0.805745	0.189954	0.00874662	0.504165	0.499609	0.166366	0.170859	-0.757393	0.695557	0.0180952	0.0374767	0.741605	-0.497986	0.0221861	0.172476	-0.0656365	-0.0672572	0.866766	0.8635	-0.467651	-0.0154474	0.204303
CL10438.Contig1_DB	1	turquoise	0.820427	0.711716	0.00674557	0.0315125	0.0168735	0.819133	0.965634	0.00690794	0.728602	-0.225442	0.0259806	0.559742	-0.73769	0.632578	0.0232873	0.0675135	0.798031	0.768692	0.00994319	0.0154981	0.0715026	-0.207638	0.854955	0.591908	-0.0620859	0.581967	0.873925	0.100172	-0.0656661	0.876871	0.866706	0.00190826	-0.11266	-0.0918829	0.772904	0.81413	0.02867	0.597016	0.941634	0.0896284	-0.772023	0.776324	0.0147829	0.0138925	-0.0545436	0.896238	0.88916
Unigene43584_DB	1	turquoise	0.854199	0.679168	0.00336884	0.0442262	0.130246	0.607128	0.738387	0.0829436	0.821964	0.670027	0.0065561	0.0483083	-0.572586	0.727005	0.10711	0.0264741	0.866041	-0.10866	0.002535	0.780806	0.164112	0.465188	0.673087	0.20702	0.036824	0.669882	0.925068	0.0483747	0.26116	0.567547	0.497287	0.110953	-0.199335	0.798773	0.607125	0.00982355	0.139128	-0.363161	0.721103	0.336736	-0.644433	-0.0165248	0.0609926	0.966344	0.0575632	0.149954	0.883057
CL5528.Contig3_DB	1	turquoise	-0.665867	0.735199	0.0502429	0.0240061	0.00519242	0.803727	0.989422	0.00904972	-0.652307	0.0292116	0.0568897	0.940533	0.553028	0.685205	0.122486	0.0416559	-0.688073	0.554706	0.0404696	0.121118	-0.0200458	-0.0641389	0.959177	0.869784	0.0411717	0.630222	0.916244	0.0688596	-0.204696	0.853472	0.597285	0.00342544	0.0373771	0.234115	0.923945	0.544314	0.00242312	0.356983	0.995064	0.34563	0.603842	0.591059	0.0850814	0.0937167	0.0156967	0.741086	0.968029
Unigene4346_DB	1	turquoise	0.446606	0.756401	0.228162	0.018336	-0.175067	0.822473	0.65234	0.00649415	0.449039	-0.203078	0.225329	0.600249	-0.495059	0.6783	0.175414	0.0446039	0.498305	0.810425	0.172158	0.00807028	-0.16979	0.0993402	0.662309	0.799283	0.130823	0.701041	0.737261	0.035377	0.0879297	0.832418	0.822021	0.00536257	0.134834	-0.308066	0.729447	0.419951	-0.170074	0.640816	0.66177	0.0629383	-0.563191	0.885465	0.114341	0.00149431	0.135353	0.83505	0.728437
CL4300.Contig1_DB	1	turquoise	-0.455606	0.891176	0.21778	0.00125661	-0.236815	0.933406	0.539545	0.000235021	-0.460162	0.106805	0.212627	0.784476	0.127889	0.847884	0.742991	0.00388245	-0.45355	0.59985	0.220129	0.0877232	-0.237371	0.186715	0.538565	0.630505	0.0927953	0.812277	0.81231	0.00781273	-0.139074	0.936939	0.721208	0.000194877	0.25465	0.157552	0.508454	0.685603	-0.219531	0.345145	0.570348	0.362988	0.156049	0.675599	0.688481	0.0457927	0.0656476	0.773205	0.866743
CL290.Contig2_DB	1	turquoise	0.859043	0.81977	0.00300798	0.00682771	0.186358	0.691274	0.631172	0.0391713	0.839515	0.801562	0.00464281	0.00938259	-0.486397	0.886328	0.184276	0.00145654	0.883755	-0.135438	0.00157112	0.728271	0.217507	0.841884	0.573997	0.00441804	0.115256	0.883379	0.767786	0.00158838	0.340913	0.588352	0.369293	0.0956116	-0.260148	0.6888	0.499017	0.0401721	0.20505	-0.416149	0.596637	0.265241	-0.579053	0.0284032	0.102297	0.942176	0.120528	0.0721634	0.757416
CL11605.Contig2_DB	1	turquoise	0.44222	0.472092	0.233316	0.199453	-0.106796	0.398128	0.784495	0.288577	0.490235	0.523181	0.180319	0.148354	-0.397251	0.504799	0.289739	0.165746	0.514977	-0.178928	0.155979	0.645075	-0.0965504	0.461565	0.804831	0.211054	-0.047279	0.452389	0.903863	0.221461	0.32792	0.354757	0.38897	0.348862	0.0934233	0.563797	0.811059	0.113867	-0.0930347	-0.380582	0.811833	0.312274	-0.464607	-0.112289	0.207664	0.773636	-0.0418883	0.0442185	0.914791
CL2402.Contig1_DB	1	turquoise	0.979993	0.433575	3.65774e-06	0.24366	0.550152	0.474575	0.124851	0.196771	0.977649	0.14145	5.37742e-06	0.716602	-0.224833	0.40927	0.560832	0.274028	0.982993	0.165506	2.07736e-06	0.670436	0.581861	-0.063326	0.100249	0.871424	-0.128159	0.330967	0.742464	0.384313	0.4646	0.500303	0.207672	0.17017	-0.611907	0.390605	0.0798952	0.29862	0.56258	0.0528436	0.114821	0.892598	-0.301652	0.172165	0.43019	0.657817	-0.118402	0.383566	0.761594
CL12705.Contig3_DB	1	turquoise	0.496624	0.850757	0.17384	0.00364258	0.0447851	0.778404	0.908917	0.0134753	0.372691	0.631068	0.32324	0.0683745	-0.514805	0.868783	0.156141	0.00236461	0.426946	0.108573	0.251754	0.780978	0.107416	0.670776	0.783268	0.0479652	-0.217364	0.873123	0.574256	0.00211131	-0.329144	0.713087	0.387096	0.0310371	-0.132441	0.631	0.734107	0.0684135	0.0543384	-0.155448	0.889575	0.689631	-0.48708	0.273241	0.183568	0.476838	-0.222187	0.308087	0.565574
CL13142.Contig1_DB	1	turquoise	-0.197347	0.843082	0.610789	0.00430734	0.0261179	0.726399	0.946823	0.0266631	-0.229476	0.737342	0.552547	0.0233866	0.0591558	0.890764	0.87984	0.00127281	-0.25746	-0.0322624	0.503622	0.934333	0.0316822	0.828244	0.935511	0.0058196	-0.636094	0.901941	0.0655363	0.000882259	-0.377014	0.624502	0.317209	0.0721968	0.0209399	0.608982	0.957357	0.0817527	0.0048064	-0.304022	0.990209	0.426395	0.191736	0.14043	0.621168	0.718578	-0.616079	0.150814	0.0772911
CL6595.Contig1_DB	1	turquoise	-0.946148	0.532462	0.000113181	0.139997	-0.544013	0.605286	0.129991	0.0841377	-0.916723	-0.0162318	0.000505442	0.96694	0.237149	0.467006	0.538956	0.205013	-0.92775	0.483128	0.000310856	0.187685	-0.582224	-0.104935	0.0999867	0.78818	0.124279	0.415419	0.750057	0.266166	-0.362886	0.644398	0.33713	0.061011	0.613213	0.199753	0.0790745	0.606356	-0.55769	0.332542	0.118708	0.381915	0.296704	0.501748	0.438163	0.168741	0.116945	0.634331	0.764459
Unigene42059_DB	1	turquoise	0.632219	-0.798209	0.0677176	0.00991444	-0.208666	-0.829715	0.590032	0.00565553	0.590956	-0.140934	0.0937887	0.717601	-0.751728	-0.732444	0.0194999	0.0248183	0.658087	-0.533769	0.0539923	0.138842	-0.162566	-0.202522	0.676031	0.601268	0.0398193	-0.712804	0.918988	0.0311348	0.0980432	-0.833977	0.801861	0.00519828	0.138288	-0.234873	0.722732	0.542975	-0.189523	-0.325968	0.625277	0.391968	-0.810194	-0.62471	0.00810285	0.0720737	0.0457771	-0.703183	0.906906
CL16943.Contig1_DB	1	turquoise	0.95582	0.701781	5.71506e-05	0.0350996	0.27313	0.770908	0.477024	0.0150199	0.916227	-0.163063	0.000515812	0.675084	-0.530682	0.651105	0.141577	0.0575042	0.954226	0.666634	6.45959e-05	0.0498828	0.315917	-0.022463	0.40757	0.954258	-0.1175	0.634118	0.763368	0.0666431	0.250216	0.81032	0.516115	0.00808514	-0.349291	-0.159283	0.356862	0.682294	0.284089	0.498122	0.458783	0.17234	-0.591269	0.705951	0.0935705	0.0335634	-0.102148	0.755832	0.793706
Unigene34241_DB	1	turquoise	0.895259	-0.761672	0.00110374	0.01708	0.174698	-0.705572	0.653035	0.033701	0.872317	-0.527592	0.00215684	0.144347	-0.553262	-0.767157	0.122294	0.0158353	0.913104	-0.125976	0.000584479	0.746733	0.205627	-0.573993	0.595581	0.106052	-0.0573065	-0.760558	0.883575	0.0173406	0.271308	-0.633009	0.480086	0.0672693	-0.236719	-0.509698	0.539715	0.161002	0.185297	0.100508	0.633151	0.796963	-0.619183	-0.261265	0.0753885	0.497108	-0.0407255	-0.307966	0.917149
CL13105.Contig2_DB	1	turquoise	0.605143	0.724906	0.0842308	0.0271319	0.394497	0.632288	0.293402	0.0676785	0.716867	0.622392	0.0297506	0.0734526	0.00519676	0.781167	0.989413	0.0129339	0.680199	-0.0646994	0.0437803	0.868654	0.417316	0.64975	0.263765	0.0582021	-0.438988	0.754495	0.237156	0.0188049	0.861669	0.565915	0.00282393	0.112215	-0.360623	0.556753	0.340376	0.119461	0.436226	-0.340601	0.240463	0.36976	-0.0436914	0.0505952	0.911134	0.897148	-0.444485	0.14037	0.230647
CL981.Contig1_DB	1	turquoise	0.79443	-0.70839	0.0105379	0.0326856	0.211485	-0.683774	0.584902	0.0422561	0.687414	-0.201141	0.0407403	0.603804	-0.520332	-0.680807	0.150976	0.0435188	0.743186	-0.435455	0.0217514	0.24139	0.250411	-0.539889	0.515777	0.133513	0.0871445	-0.735765	0.82359	0.0238416	-0.154385	-0.623018	0.691669	0.0730786	-0.320885	-0.00711915	0.399823	0.985498	0.203856	-0.232362	0.598822	0.54742	-0.563868	-0.578479	0.113811	0.102719	0.101406	-0.462235	0.79518
CL10829.Contig2_DB	1	turquoise	0.858689	0.700115	0.0030334	0.0357262	0.125469	0.807007	0.747726	0.00856065	0.847507	-0.309337	0.00391472	0.417936	-0.560013	0.612361	0.116852	0.0796094	0.888935	0.875141	0.0013465	0.00200019	0.158724	-0.0847695	0.683361	0.82834	-0.0268739	0.624554	0.945286	0.0721661	0.355623	0.835428	0.347604	0.0050486	-0.184274	-0.324098	0.635061	0.39485	0.141059	0.746625	0.717359	0.0208251	-0.635682	0.927902	0.065766	0.000308625	-0.00908898	0.897809	0.981485
Unigene44089_DB	1	turquoise	0.894853	0.555386	0.00111836	0.120566	0.538247	0.41746	0.134931	0.263584	0.888869	0.756762	0.00134922	0.0182483	-0.229833	0.628507	0.551912	0.0698497	0.878152	-0.233001	0.00184203	0.546288	0.577552	0.771975	0.103403	0.014793	-0.56229	0.652054	0.11505	0.0570186	0.346608	0.315921	0.360821	0.407564	-0.561903	0.625818	0.115355	0.07142	0.549404	-0.451778	0.12547	0.222164	-0.228787	-0.0859022	0.553773	0.826074	-0.545906	-0.121395	0.128393
CL17287.Contig1_DB	1	turquoise	0.856798	0.69583	0.00317167	0.0373703	0.761476	0.546697	0.0171257	0.127729	0.848415	0.804483	0.00383735	0.00893533	0.0317501	0.774183	0.935374	0.0143311	0.819141	-0.238044	0.00690701	0.53738	0.804028	0.932833	0.009004	0.000242028	-0.488703	0.791599	0.181893	0.0110217	0.384424	0.42278	0.307004	0.256914	-0.799466	0.601918	0.00971281	0.0863482	0.77535	-0.492758	0.0140911	0.177745	0.0204983	-0.0691837	0.958256	0.859621	-0.488441	-0.0778401	0.182162
CL18043.Contig1_DB	1	turquoise	0.609561	-0.900692	0.0813829	0.000921069	-0.25603	-0.826348	0.506078	0.00603562	0.542163	-0.584814	0.131564	0.0981227	-0.836575	-0.917379	0.00493235	0.000491968	0.614269	-0.149099	0.0784145	0.701829	-0.198062	-0.623536	0.60947	0.0727699	-0.127767	-0.908764	0.74323	0.00069016	-0.0258033	-0.766366	0.947463	0.0160109	0.187357	-0.547207	0.62931	0.127301	-0.238067	0.12043	0.53734	0.757608	-0.857198	-0.295962	0.00314207	0.439365	-0.114723	-0.35684	0.768837
Unigene3066_DB	1	turquoise	-0.469313	0.82256	0.20248	0.00648359	-0.366056	0.788077	0.332608	0.0116444	-0.468211	0.30645	0.203688	0.422521	-0.0293397	0.819152	0.940272	0.00690553	-0.464314	0.380431	0.20799	0.312482	-0.343994	0.427699	0.364697	0.250828	-0.164408	0.824035	0.672523	0.00630661	-0.0715198	0.766303	0.854921	0.016025	0.407057	0.22793	0.276887	0.555301	-0.334658	0.116199	0.378706	0.765929	0.0358396	0.491517	0.927066	0.179009	-0.189617	0.496109	0.625103
CL13486.Contig1_DB	1	turquoise	0.406167	0.854519	0.27804	0.00334411	0.081053	0.747004	0.835781	0.0207249	0.332314	0.685962	0.382262	0.0413406	-0.254606	0.891491	0.50853	0.00124433	0.383511	0.0430357	0.308252	0.912463	0.0780899	0.849964	0.841723	0.00370776	0.41705	0.914416	0.264101	0.000554901	-0.240576	0.645817	0.532929	0.0602584	-0.168714	0.53493	0.664348	0.137822	0.0663928	-0.237693	0.865242	0.537999	-0.319729	0.224105	0.40162	0.562136	0.41492	0.205699	0.2668
CL2277.Contig2_DB	1	turquoise	-0.77998	-0.691184	0.0131647	0.0392073	-0.599609	-0.722796	0.0878839	0.0278041	-0.724545	0.074955	0.0272463	0.848016	0.0522944	-0.637501	0.893709	0.0647549	-0.730742	-0.56807	0.0253289	0.110551	-0.611755	-0.145398	0.0799911	0.708966	-0.0854801	-0.623731	0.826918	0.072654	-0.0709192	-0.734175	0.856129	0.0243058	0.683301	0.153612	0.042456	0.693153	-0.582778	-0.381971	0.0995862	0.310363	0.112305	-0.619532	0.773605	0.0751763	-0.0990935	-0.665341	0.799773
CL24745.Contig1_DB	1	turquoise	0.900581	0.433023	0.000924552	0.244329	0.628374	0.441929	0.0699268	0.233661	0.918236	-0.0493549	0.000474754	0.899659	-0.0521983	0.397483	0.893904	0.289431	0.909535	0.362938	0.000670499	0.337055	0.655065	0.302636	0.055495	0.428613	-0.0548204	0.432239	0.8886	0.24528	0.586553	0.396257	0.096884	0.291058	-0.682015	-0.251105	0.0430016	0.514575	0.645843	0.273986	0.0602446	0.475587	-0.141593	0.44049	0.716325	0.235367	-0.051368	0.367286	0.895584
CL23489.Contig1_DB	1	turquoise	0.852862	-0.772224	0.00347341	0.0147404	0.180589	-0.646344	0.641959	0.05998	0.816825	-0.783026	0.00720412	0.012578	-0.518546	-0.845148	0.152635	0.00412083	0.863345	0.177698	0.00271065	0.647388	0.21341	-0.769119	0.581409	0.0154052	-0.0111493	-0.830084	0.977289	0.0056149	0.195577	-0.555897	0.614057	0.120153	-0.254304	-0.698582	0.509049	0.0363088	0.193794	0.444731	0.617355	0.230358	-0.585289	0.0328158	0.0977834	0.933208	-0.00497904	-0.039442	0.989857
CL7129.Contig1_DB	1	turquoise	0.93788	0.900292	0.000185064	0.00093372	0.326292	0.931085	0.391469	0.000264345	0.915741	0.0614868	0.000526095	0.875134	-0.468054	0.872587	0.203861	0.00214154	0.937637	0.608566	0.000187568	0.0820188	0.366308	0.209653	0.33225	0.588234	-0.333535	0.85248	0.380407	0.00350372	0.292957	0.929377	0.444245	0.000287505	-0.374423	0.00941355	0.320817	0.980824	0.337655	0.367927	0.374182	0.329953	-0.498998	0.685713	0.171466	0.041444	-0.313907	0.742381	0.410724
Unigene31421_DB	1	turquoise	0.802588	0.843893	0.00922379	0.00423342	0.490774	0.749767	0.179767	0.0200023	0.769459	0.705079	0.0153314	0.0338811	-0.17446	0.883579	0.653484	0.0015792	0.780965	0.0027735	0.0129729	0.99435	0.525384	0.751484	0.146345	0.0195617	-0.112148	0.877457	0.773916	0.00187777	0.217129	0.669077	0.57468	0.0487458	-0.559513	0.662269	0.11725	0.0519556	0.505092	-0.283755	0.165461	0.459334	-0.223677	0.162972	0.562902	0.675257	-0.122718	0.217527	0.753117
Unigene4749_DB	1	turquoise	0.918229	0.84076	0.000474884	0.00452369	0.682865	0.919698	0.0426404	0.000446356	0.953444	-0.133232	6.84904e-05	0.732565	-0.028599	0.762012	0.941778	0.0170011	0.926171	0.807838	0.000334764	0.0084396	0.71439	0.0631863	0.0305898	0.871705	-0.340474	0.75902	0.36995	0.0177047	0.623524	0.945908	0.0727772	0.000114934	-0.712517	-0.116846	0.0312343	0.764656	0.699102	0.60759	0.0361106	0.0826459	-0.0867898	0.883133	0.824299	0.00159977	-0.331522	0.905026	0.383466
CL28724.Contig1_DB	1	turquoise	-0.800657	0.899078	0.00952429	0.000972957	-0.0411597	0.908209	0.916269	0.000704578	-0.710894	0.296176	0.0317997	0.439018	0.698521	0.87315	0.036332	0.00210978	-0.772202	0.414342	0.0147452	0.267534	-0.0812398	0.257078	0.835407	0.504277	0.0758145	0.823271	0.84629	0.00639795	0.128457	0.909531	0.741882	0.000670587	0.126753	0.411289	0.745213	0.271433	-0.0362108	0.151258	0.926313	0.697674	0.723776	0.499851	0.0274905	0.170619	0.0525718	0.648635	0.893148
CL24212.Contig1_DB	1	turquoise	0.858563	0.89134	0.0030425	0.00125022	0.446566	0.89009	0.228209	0.00129964	0.863521	0.292954	0.00269894	0.44425	-0.203455	0.875738	0.599558	0.00196815	0.87582	0.458176	0.00196376	0.214866	0.47492	0.455164	0.1964	0.218284	0.066405	0.885014	0.865217	0.00151432	0.498275	0.847805	0.172187	0.0038892	-0.513654	0.253076	0.157229	0.511167	0.463244	0.20803	0.209179	0.591192	-0.304524	0.594078	0.425591	0.0916308	0.0705186	0.593811	0.856935
CL192.Contig1_DB	1	turquoise	0.741999	-0.928693	0.0220772	0.000297166	0.482655	-0.852941	0.188181	0.0034672	0.757325	-0.632921	0.0181116	0.0673193	-0.142865	-0.958144	0.713863	4.74122e-05	0.73793	-0.124408	0.0232187	0.749804	0.534541	-0.65296	0.138164	0.0565574	-0.478971	-0.944882	0.192071	0.000122622	0.538335	-0.78468	0.134855	0.0122671	-0.498611	-0.600934	0.171852	0.0870007	0.512106	0.160488	0.158699	0.679992	-0.155556	-0.275051	0.689424	0.473805	-0.473528	-0.343107	0.197899
CL26370.Contig2_DB	1	turquoise	0.814175	0.506938	0.00755477	0.163665	0.0823876	0.379325	0.833108	0.314008	0.720593	0.740103	0.0285174	0.0226043	-0.687964	0.566391	0.0405142	0.111846	0.778759	-0.307046	0.0134049	0.421573	0.138948	0.610732	0.721451	0.0806381	-0.191127	0.530274	0.622297	0.141942	-0.049754	0.320128	0.898851	0.400999	-0.162879	0.752188	0.675434	0.0193831	0.0943241	-0.543785	0.809263	0.130184	-0.695969	-0.212996	0.0373162	0.582159	-0.178025	-0.0963805	0.646772
CL22251.Contig1_DB	1	turquoise	-0.744503	-0.789163	0.0213936	0.01145	-0.0863095	-0.774957	0.82526	0.0141716	-0.645111	-0.363253	0.060632	0.336604	0.647299	-0.790612	0.0594782	0.0111939	-0.69582	-0.238014	0.0373741	0.537433	-0.13684	-0.37691	0.725544	0.317354	0.290219	-0.763664	0.448712	0.0166208	0.191405	-0.738725	0.621782	0.0229928	0.1577	-0.398187	0.685321	0.288498	-0.0875017	-0.0314204	0.822877	0.936043	0.629714	-0.342692	0.0691521	0.366636	0.274774	-0.440255	0.474268
CL26474.Contig1_DB	1	turquoise	0.765828	0.857498	0.0161312	0.00312002	-0.0907443	0.803542	0.816401	0.00907778	0.693352	0.425615	0.0383431	0.253397	-0.770865	0.86095	0.015029	0.00287351	0.76474	0.280284	0.016376	0.465082	-0.0483611	0.540843	0.901671	0.132693	0.055615	0.859733	0.886994	0.00295884	0.00480672	0.747781	0.990208	0.02052	0.00553174	0.326847	0.988731	0.390616	-0.0844459	0.0177443	0.828987	0.963861	-0.822683	0.406493	0.0064687	0.277618	0.076036	0.429282	0.845845
CL5299.Contig2_DB	1	turquoise	0.821826	-0.738049	0.00657298	0.0231848	0.0029969	-0.756933	0.993895	0.0182067	0.782943	-0.153216	0.0125939	0.693912	-0.693406	-0.680056	0.0383215	0.043842	0.839479	-0.450123	0.00464624	0.224074	0.0437725	-0.213472	0.91097	0.581295	-0.102226	-0.64971	0.793551	0.058223	0.133318	-0.766756	0.732397	0.0159242	-0.0717906	-0.239798	0.854376	0.534295	0.0157573	-0.234449	0.967906	0.543725	-0.745917	-0.526475	0.0210137	0.145356	-0.0897134	-0.631338	0.818459
CL10794.Contig3_DB	1	turquoise	-0.670368	0.543592	0.048152	0.130348	-0.389366	0.494277	0.300291	0.176205	-0.589207	0.529901	0.0950105	0.142275	0.189991	0.576577	0.624407	0.104124	-0.619319	-0.0955648	0.075306	0.806792	-0.394745	0.311259	0.293072	0.414896	-0.220547	0.508914	0.568521	0.161756	0.130391	0.484213	0.738104	0.18655	0.48127	0.703403	0.189638	0.0344967	-0.365622	-0.315643	0.333224	0.407999	0.244922	-0.0382281	0.525322	0.922217	-0.238215	0.153268	0.537078
CL9162.Contig3_DB	1	turquoise	0.56362	0.8939	0.114005	0.00115309	-0.210605	0.849166	0.586502	0.00377418	0.489999	0.387857	0.180561	0.302333	-0.716212	0.908296	0.0299712	0.00070231	0.570662	0.337621	0.108568	0.374233	-0.160651	0.596294	0.679681	0.0901181	0.151181	0.928323	0.697822	0.000302489	-0.0602846	0.792593	0.877561	0.0108503	0.117612	0.245759	0.763147	0.523862	-0.18693	0.0666026	0.630104	0.864819	-0.773074	0.484313	0.0145619	0.186445	0.139686	0.458676	0.720021
CL5097.Contig2_DB	1	turquoise	-0.720476	0.598972	0.0285554	0.0883109	-0.264091	0.744703	0.492293	0.0213396	-0.700333	-0.474026	0.0356437	0.197362	0.301847	0.495566	0.429877	0.174903	-0.723204	0.939011	0.0276735	0.000173734	-0.270499	-0.338583	0.481447	0.372786	-0.111435	0.479444	0.775323	0.191569	-0.178103	0.814429	0.646626	0.00752069	0.318715	-0.394472	0.403198	0.293436	-0.257686	0.835956	0.503233	0.00499489	0.369477	0.939126	0.327762	0.000172605	-0.128844	0.968206	0.741125
CL24253.Contig1_DB	1	turquoise	0.763771	-0.491982	0.0165964	0.178534	0.0335366	-0.345383	0.931744	0.362636	0.767169	-0.711425	0.0158326	0.0316141	-0.569478	-0.56819	0.109471	0.110459	0.804781	0.348537	0.00889046	0.357973	0.0606909	-0.69517	0.87674	0.0376276	-0.110937	-0.551721	0.776307	0.123557	0.316498	-0.262748	0.406661	0.494579	-0.0704649	-0.58359	0.857043	0.0990014	0.0498549	0.555621	0.898647	0.120376	-0.626724	0.24615	0.0708887	0.52318	-0.0971832	0.177699	0.803572
CL22509.Contig1_DB	1	turquoise	0.811749	0.63344	0.00788564	0.0670256	-0.0157084	0.469135	0.968006	0.202675	0.789958	0.88841	0.0113091	0.00136819	-0.685022	0.716373	0.0417323	0.0299168	0.843451	-0.320574	0.00427356	0.400305	0.0276924	0.974169	0.943622	8.89354e-06	-0.0961264	0.74884	0.805674	0.0202429	0.257602	0.338657	0.503378	0.372675	-0.0426143	0.711481	0.913318	0.0315945	0.008276	-0.557983	0.983141	0.118473	-0.743206	-0.136033	0.021746	0.727113	-0.0897913	-0.176095	0.818303
CL26734.Contig1_DB	1	turquoise	0.880664	0.776154	0.00171689	0.0139271	0.639163	0.879169	0.0638399	0.00179062	0.918346	-0.172192	0.000472576	0.657765	-0.0419033	0.691359	0.91476	0.0391371	0.895281	0.792529	0.00110295	0.0108613	0.675936	-0.117873	0.045643	0.762635	-0.40379	0.657771	0.281135	0.0541484	0.626479	0.9276	0.071032	0.000313077	-0.66147	-0.0393057	0.052341	0.92003	0.668928	0.613839	0.0488147	0.0786827	-0.0883089	0.831938	0.821264	0.00541375	-0.409794	0.922519	0.273353
CL15043.Contig1_DB	1	turquoise	0.712776	0.639696	0.0311445	0.0635481	0.445349	0.572381	0.229632	0.107265	0.775917	0.392373	0.0139752	0.296244	-0.0592338	0.677544	0.879682	0.0449347	0.757749	0.0912587	0.0180093	0.815375	0.471648	0.416919	0.199935	0.264267	-0.20636	0.651137	0.594241	0.057488	0.751412	0.534489	0.0195802	0.138209	-0.451391	0.289728	0.22261	0.449516	0.478726	-0.148325	0.192331	0.703319	-0.127247	0.159175	0.744248	0.682501	-0.204427	0.224503	0.597776
CL19494.Contig2_DB	1	turquoise	0.814743	0.820565	0.00747863	0.00672843	0.0354054	0.911935	0.927948	0.000611735	0.728461	-0.20767	0.0260239	0.591849	-0.726086	0.746662	0.026761	0.0208154	0.790254	0.828197	0.0112569	0.00582486	0.0912688	-0.0615855	0.815355	0.874935	-0.18752	0.72188	0.629005	0.0280992	-0.036104	0.953426	0.926529	6.85798e-05	-0.117022	-0.180974	0.764309	0.641237	0.0465428	0.630596	0.905355	0.0686447	-0.742269	0.868651	0.0220027	0.00237262	-0.172297	0.930727	0.657567
CL1572.Contig2_DB	1	turquoise	0.799923	0.794916	0.00964015	0.0104562	0.421952	0.666352	0.257946	0.0500147	0.813154	0.807414	0.00769282	0.00850113	-0.18028	0.865471	0.642538	0.00257144	0.820091	-0.174157	0.00678753	0.654055	0.432504	0.809645	0.244958	0.00818055	-0.0614132	0.84882	0.875283	0.00380315	0.365996	0.56799	0.332693	0.110612	-0.469226	0.716544	0.202576	0.0298592	0.423809	-0.456777	0.255634	0.21645	-0.257033	-0.0244188	0.504354	0.950279	-0.0487565	0.0500588	0.900871
CL22214.Contig1_DB	1	turquoise	0.811596	-0.402424	0.00790679	0.282921	-0.046437	-0.329528	0.905569	0.386509	0.759129	-0.38599	0.0176786	0.304869	-0.757692	-0.389017	0.018023	0.300762	0.82259	-0.0286314	0.00648003	0.941712	0.00776064	-0.569077	0.984191	0.109777	-0.128754	-0.430603	0.7413	0.247271	0.112521	-0.263064	0.773179	0.494042	-0.0291909	-0.2807	0.940575	0.464391	-0.0257646	0.109117	0.947542	0.779903	-0.802475	-0.154783	0.00924123	0.690905	-0.121552	-0.0877892	0.755405
CL12599.Contig1_DB	1	turquoise	0.939881	-0.646781	0.000165359	0.0597501	0.4042	-0.560044	0.2806	0.116827	0.910086	-0.595857	0.000656672	0.0904151	-0.386242	-0.666657	0.304525	0.049872	0.931666	-0.0269571	0.000256777	0.945117	0.450071	-0.641677	0.224134	0.0624716	-0.218968	-0.707088	0.571364	0.0331524	0.344667	-0.490295	0.363697	0.180258	-0.4666	-0.553504	0.205459	0.122096	0.423704	0.159833	0.255765	0.681243	-0.432555	-0.192715	0.244897	0.619353	-0.210391	-0.138067	0.586892
CL4514.Contig2_DB	1	turquoise	0.580177	-0.626348	0.101475	0.0711088	-0.268555	-0.553539	0.484727	0.122068	0.505372	-0.494527	0.165187	0.175951	-0.869751	-0.664288	0.00230638	0.0509898	0.571486	-0.092486	0.107942	0.812927	-0.202215	-0.585574	0.601831	0.0975803	-0.421057	-0.685826	0.259064	0.0413972	-0.122053	-0.493192	0.754422	0.177303	0.219648	-0.398289	0.570138	0.288364	-0.248448	0.152047	0.519183	0.696158	-0.839564	-0.219179	0.00463807	0.570982	-0.4084	-0.176728	0.27515
CL14972.Contig1_DB	1	turquoise	-0.898283	0.663037	0.000999235	0.0515871	-0.357143	0.645159	0.345398	0.0606067	-0.9129	0.390639	0.000589166	0.298574	0.332542	0.681581	0.381915	0.0431869	-0.926257	0.141424	0.000333436	0.716653	-0.383266	0.187594	0.308587	0.628867	0.09325	0.626383	0.811404	0.0710885	-0.471254	0.641425	0.200363	0.0626078	0.404879	0.531085	0.279714	0.141219	-0.371343	-0.0644383	0.325133	0.869181	0.412672	0.197741	0.269664	0.610061	0.0823259	0.345646	0.833231
CL1863.Contig1_DB	1	turquoise	0.916979	-0.948426	0.000500157	9.75128e-05	0.397684	-0.882357	0.289165	0.00163594	0.887519	-0.50378	0.00140552	0.166743	-0.363987	-0.959737	0.335555	4.14572e-05	0.912002	-0.274621	0.000610145	0.474524	0.442331	-0.666654	0.233186	0.049873	-0.174522	-0.964673	0.653368	2.63563e-05	0.288728	-0.817252	0.451152	0.00714869	-0.470859	-0.384589	0.200794	0.306779	0.416109	0.0264683	0.265291	0.946111	-0.421644	-0.426654	0.258331	0.252115	-0.175607	-0.442778	0.651323
CL1572.Contig3_DB	1	turquoise	0.640021	0.58552	0.063371	0.0976187	0.0200402	0.557156	0.959188	0.119137	0.630014	0.100309	0.0689793	0.797358	-0.496464	0.563762	0.174	0.113894	0.666439	0.414232	0.0499738	0.267675	0.0347875	0.500593	0.929203	0.169883	-0.109982	0.632416	0.778193	0.0676058	0.141253	0.497141	0.716984	0.173321	-0.0504687	-0.17423	0.897404	0.653919	0.0262062	0.250317	0.946644	0.51594	-0.531253	0.54011	0.14107	0.133323	-0.0958813	0.382163	0.806162
CL23868.Contig2_DB	1	turquoise	0.339914	0.827218	0.370789	0.00593578	0.328473	0.904168	0.388123	0.000815919	0.378856	-0.165546	0.314656	0.67036	0.106811	0.763456	0.784464	0.0166683	0.36264	0.78842	0.337482	0.0115829	0.339646	0.0127027	0.371189	0.974126	-0.159261	0.752424	0.682336	0.0193235	0.384174	0.927436	0.307345	0.000315519	-0.321193	-0.190524	0.399345	0.623418	0.361613	0.601976	0.338954	0.08631	0.0849449	0.844501	0.827989	0.00417867	-0.188803	0.874686	0.626618
CL4289.Contig3_DB	1	turquoise	0.630005	-0.495534	0.0689843	0.174936	0.344283	-0.361332	0.364268	0.339357	0.521747	-0.768557	0.149671	0.0155276	-0.255188	-0.537438	0.507526	0.135633	0.558239	0.311818	0.118268	0.414014	0.378811	-0.774983	0.314719	0.0141663	0.083759	-0.551116	0.830362	0.124055	-0.22117	-0.264592	0.5674	0.491442	-0.447306	-0.72051	0.227345	0.0285446	0.338464	0.486711	0.372965	0.183951	-0.282021	0.159007	0.462202	0.682821	0.0789679	0.139372	0.839961
Unigene34051_DB	1	turquoise	-0.847843	-0.55454	0.00388598	0.121252	-0.535526	-0.502055	0.137301	0.168439	-0.873585	-0.450344	0.00208551	0.223818	0.066334	-0.583413	0.86536	0.0991287	-0.872146	0.0640538	0.00216664	0.869956	-0.537963	-0.382387	0.135177	0.309793	-0.147521	-0.542005	0.704869	0.131699	-0.50898	-0.446243	0.161692	0.228587	0.59039	-0.461437	0.0941831	0.211197	-0.536332	0.215154	0.136596	0.57825	0.179674	-0.00960295	0.643676	0.980439	-0.160206	-0.135674	0.680531
CL1117.Contig1_DB	1	turquoise	0.957911	-0.830274	4.83296e-05	0.0055941	0.44815	-0.746927	0.226362	0.0207453	0.945446	-0.642798	0.000118349	0.0618671	-0.35184	-0.84275	0.353121	0.00433779	0.954493	-0.0830617	6.33052e-05	0.831758	0.494804	-0.71763	0.175672	0.0294955	-0.310144	-0.853238	0.416659	0.00344375	0.432283	-0.668864	0.245226	0.0488442	-0.499443	-0.606241	0.171024	0.0835177	0.465652	0.170276	0.206506	0.661388	-0.395956	-0.252852	0.291459	0.511554	-0.294277	-0.274204	0.442099
Unigene4184_DB	1	turquoise	-0.716173	-0.773469	0.0299841	0.0144795	0.0282675	-0.655862	0.942452	0.0550962	-0.633065	-0.734957	0.0672375	0.0240768	0.689377	-0.814096	0.0399373	0.00756537	-0.694222	0.0340765	0.0379995	0.930647	-0.00758092	-0.839168	0.984557	0.00467628	0.0222837	-0.84755	0.954623	0.00391109	0.124666	-0.554559	0.7493	0.121237	0.0480937	-0.615325	0.902213	0.077758	0.0308576	0.284575	0.937187	0.457981	0.713721	-0.151884	0.0308189	0.696471	0.00223953	-0.111685	0.995438
CL2068.Contig2_DB	1	turquoise	-0.636705	0.519677	0.0651964	0.151584	0.0680743	0.44588	0.861855	0.229011	-0.626163	0.491369	0.0712171	0.17916	0.65724	0.552985	0.0544107	0.12252	-0.658076	0.00361638	0.0539976	0.992633	0.00411831	0.606519	0.99161	0.0833377	0.608616	0.568064	0.081987	0.110555	-0.224334	0.375915	0.561724	0.318737	-0.0524822	0.400514	0.893329	0.285428	0.0345566	-0.220949	0.929672	0.567798	0.636458	0.121814	0.0653334	0.754891	0.602528	0.0970345	0.0859454
CL15243.Contig1_DB	1	turquoise	0.905353	-0.7926	0.000782098	0.010849	0.133485	-0.712122	0.732071	0.0313711	0.858805	-0.505964	0.00302507	0.164611	-0.645677	-0.81911	0.0603321	0.00691084	0.907017	-0.113725	0.000736233	0.770803	0.176637	-0.674652	0.649383	0.0462142	-0.164137	-0.831121	0.673038	0.00550187	0.16098	-0.622953	0.679054	0.0731173	-0.202689	-0.332963	0.600962	0.381275	0.143996	0.113598	0.711676	0.771054	-0.689422	-0.257322	0.0399188	0.503858	-0.146029	-0.255597	0.707748
CL13977.Contig2_DB	1	turquoise	0.875761	0.476389	0.0019669	0.194824	0.703524	0.581696	0.034452	0.100369	0.859521	-0.164393	0.00297388	0.672552	-0.0226739	0.397291	0.953829	0.289686	0.845818	0.577635	0.0040616	0.103342	0.737279	-0.283045	0.0234048	0.460507	-0.304155	0.363848	0.426182	0.335755	0.330626	0.646626	0.384832	0.0598316	-0.758069	0.0935135	0.0179323	0.810879	0.712823	0.506115	0.0311283	0.164464	-0.0591198	0.591449	0.879912	0.0934457	-0.304066	0.689137	0.426325
Unigene2817_DB	1	turquoise	0.53571	-0.821834	0.137139	0.00657203	0.371221	-0.73878	0.325304	0.022977	0.55496	-0.61383	0.120911	0.0786881	-0.091737	-0.845591	0.814421	0.0040816	0.532728	-0.0291084	0.139762	0.940743	0.410963	-0.606889	0.271851	0.0830982	-0.590433	-0.816442	0.0941528	0.00725409	0.327493	-0.677744	0.389624	0.0448468	-0.363304	-0.597259	0.336532	0.0894642	0.398753	0.230582	0.28775	0.550579	-0.0666317	-0.155321	0.86476	0.689876	-0.60123	-0.265718	0.0868044
CL14137.Contig1_DB	1	turquoise	-0.71471	0.766272	0.0304804	0.0160318	-0.0704886	0.854315	0.856995	0.00335986	-0.692532	-0.214279	0.0386682	0.579834	0.477088	0.710658	0.194076	0.0318825	-0.741877	0.769213	0.022111	0.0153847	-0.0909466	-0.0748006	0.815997	0.848326	-0.227324	0.687795	0.556382	0.0405837	-0.202277	0.88836	0.601717	0.00137025	0.143689	-0.218139	0.712268	0.572857	-0.0828939	0.594551	0.832094	0.091307	0.570334	0.80192	0.108818	0.00932705	-0.226274	0.852906	0.558255
CL5321.Contig2_DB	1	turquoise	-0.807896	0.757851	0.00843124	0.0179846	-0.523642	0.854066	0.147933	0.00337911	-0.834878	-0.153542	0.00510504	0.693287	0.0819659	0.677949	0.833953	0.0447572	-0.827835	0.775833	0.00586571	0.0139924	-0.554577	-0.0926904	0.121223	0.812519	0.153241	0.664601	0.693864	0.0508414	-0.531641	0.896471	0.140725	0.00106098	0.567374	-0.0387685	0.111086	0.92112	-0.549144	0.622407	0.125687	0.0734435	0.15722	0.831519	0.686238	0.00545877	0.165138	0.877715	0.671135
CL21077.Contig1_DB	1	turquoise	-0.414441	0.857988	0.267409	0.00308418	-0.18541	0.75207	0.63294	0.0194129	-0.318817	0.678726	0.403039	0.0444185	0.306469	0.906771	0.422491	0.00074289	-0.343133	0.0429553	0.365978	0.912627	-0.253064	0.810993	0.511189	0.00799079	0.492109	0.930252	0.178404	0.000275467	0.227636	0.650319	0.555825	0.0579086	0.240087	0.51819	0.533787	0.152966	-0.207945	-0.226003	0.591347	0.55874	0.243881	0.218837	0.527141	0.571599	0.513028	0.192853	0.157822
CL3329.Contig3_DB	1	turquoise	0.961519	0.44048	3.54425e-05	0.235378	0.331399	0.538244	0.383655	0.134934	0.912247	-0.286593	0.000604366	0.454658	-0.49613	0.374794	0.174336	0.320299	0.946493	0.653054	0.000110701	0.0565097	0.377203	-0.15145	0.316946	0.697304	-0.207559	0.380654	0.592052	0.312174	0.194772	0.553833	0.615544	0.121828	-0.406246	-0.280901	0.277937	0.464057	0.342919	0.592944	0.366298	0.0924112	-0.538648	0.675603	0.134584	0.0457907	-0.196233	0.648268	0.612844
Unigene4931_DB	1	turquoise	0.80293	0.949056	0.00917128	9.34684e-05	-0.0351499	0.893477	0.928467	0.0011688	0.716872	0.483907	0.0297491	0.186869	-0.767293	0.96254	0.0158052	3.2292e-05	0.787752	0.294238	0.0117031	0.442163	0.0106686	0.669051	0.978268	0.0487578	-0.0476201	0.972429	0.903172	1.11539e-05	-0.0870265	0.818375	0.823826	0.00700428	-0.0528384	0.354843	0.892609	0.348737	-0.0292223	0.00529041	0.940511	0.989223	-0.800844	0.451149	0.00949478	0.222889	-0.033277	0.452092	0.932271
CL2181.Contig6_DB	1	turquoise	0.83149	0.732352	0.00546193	0.0248458	0.767051	0.601142	0.0158588	0.0868628	0.845282	0.723236	0.00410896	0.0276631	0.0971629	0.815438	0.803612	0.00738622	0.813033	-0.144514	0.00770926	0.710674	0.80506	0.825889	0.00884867	0.0060888	-0.369228	0.826932	0.328112	0.00596847	0.548056	0.495628	0.126592	0.174841	-0.800203	0.524848	0.00959573	0.146833	0.788445	-0.406413	0.0115783	0.277721	0.0609515	0.00704935	0.876214	0.98564	-0.371043	0.00205192	0.325555
CL21737.Contig1_DB	1	turquoise	0.782749	0.951915	0.0126307	7.6576e-05	0.390888	0.947655	0.298239	0.000102634	0.83807	0.211711	0.00478356	0.584492	-0.178328	0.936627	0.646203	0.000198209	0.826986	0.542115	0.00596236	0.131605	0.408412	0.435125	0.275135	0.241787	-0.235223	0.946721	0.542357	0.000109084	0.607464	0.909647	0.0827271	0.000667668	-0.399328	0.0847926	0.286991	0.828294	0.409838	0.281555	0.273297	0.462973	-0.241115	0.666944	0.531983	0.0497374	-0.22562	0.657031	0.559424
CL29284.Contig1_DB	1	turquoise	0.802126	-0.857254	0.00929516	0.00313797	0.10246	-0.849789	0.793088	0.00372228	0.724779	-0.267876	0.0271722	0.485875	-0.648896	-0.814976	0.0586449	0.0074475	0.775908	-0.49291	0.0139772	0.17759	0.163285	-0.422102	0.674661	0.25776	-0.262731	-0.833307	0.494608	0.00526851	0.036921	-0.821815	0.924871	0.00657429	-0.176697	-0.245771	0.649271	0.523842	0.119415	-0.256531	0.759601	0.505216	-0.65863	-0.629039	0.053725	0.0695418	-0.251378	-0.614672	0.514103
CL9550.Contig3_DB	1	turquoise	-0.436539	0.508248	0.240087	0.162398	0.400941	0.407292	0.284867	0.276582	-0.361424	0.465031	0.339226	0.207194	0.789593	0.569396	0.0113736	0.109534	-0.455252	-0.051663	0.218185	0.894987	0.36458	0.608473	0.33471	0.0820786	-0.317608	0.608567	0.404926	0.0820182	0.165886	0.341859	0.669713	0.367879	-0.310934	0.262076	0.41541	0.495725	0.384011	-0.229461	0.307568	0.552573	0.853308	0.0702543	0.00343826	0.857467	-0.308694	-0.00495424	0.418956
CL713.Contig1_DB	1	turquoise	0.934694	0.800393	0.000219769	0.00956587	0.473133	0.857617	0.198327	0.00311128	0.917414	0.0298602	0.000491258	0.939214	-0.261998	0.739057	0.495858	0.0228987	0.936391	0.655018	0.000200768	0.0555188	0.499867	0.0800707	0.170603	0.83775	0.0310707	0.731367	0.936754	0.0251405	0.380486	0.889483	0.312406	0.00132414	-0.545498	0.140094	0.128736	0.719229	0.485032	0.453512	0.185696	0.220172	-0.347911	0.738372	0.358896	0.0230929	0.036331	0.780794	0.926068
CL20535.Contig1_DB	1	turquoise	0.802148	-0.710426	0.00929171	0.0319643	0.777231	-0.578393	0.0137096	0.102783	0.880907	-0.776554	0.00170513	0.0138461	0.223238	-0.776794	0.563689	0.0137976	0.831602	0.199142	0.00544988	0.607481	0.788841	-0.739183	0.0115075	0.022863	-0.25364	-0.760306	0.510195	0.0174	0.816408	-0.490675	0.00725863	0.179868	-0.778851	-0.695576	0.0133866	0.037469	0.798412	0.458336	0.00988178	0.214684	0.150394	0.0657721	0.699337	0.866492	-0.250631	-0.00490374	0.515396
CL7012.Contig3_DB	1	turquoise	0.945352	0.582453	0.000119055	0.0998209	0.328317	0.723824	0.388361	0.0274753	0.897915	-0.434669	0.00101156	0.242338	-0.500222	0.487374	0.17025	0.183264	0.92875	0.875725	0.000296349	0.00196883	0.382193	-0.356786	0.310059	0.345916	-0.326192	0.460498	0.391623	0.21225	0.212887	0.8087	0.582357	0.00831535	-0.395761	-0.303842	0.291718	0.426683	0.345793	0.76498	0.362027	0.0163219	-0.526987	0.870171	0.144893	0.00228144	-0.31726	0.932821	0.40547
CL12293.Contig1_DB	1	turquoise	0.761996	0.626275	0.0170048	0.0711514	0.476539	0.533118	0.194663	0.139417	0.720887	0.633975	0.0284213	0.0667238	-0.129563	0.676759	0.739722	0.0452797	0.739942	-0.110339	0.0226494	0.777488	0.498744	0.495542	0.17172	0.174928	0.2443	0.653366	0.526408	0.0563514	0.24058	0.498393	0.532922	0.17207	-0.567809	0.677524	0.110751	0.0449436	0.478498	-0.336883	0.192573	0.375345	-0.223452	-0.00655632	0.563306	0.986644	0.247633	0.0836303	0.5206
CL9764.Contig2_DB	1	turquoise	0.601059	0.496877	0.0869179	0.173586	0.58008	0.52256	0.101546	0.148924	0.722336	0.0752972	0.027952	0.847329	0.253782	0.497767	0.50995	0.172695	0.675121	0.301193	0.0460051	0.430927	0.573542	0.139156	0.10639	0.721048	-0.103761	0.504251	0.790508	0.166282	0.897674	0.494132	0.00101971	0.176351	-0.560346	0.0458993	0.116588	0.906659	0.605012	0.21792	0.0843162	0.573252	0.157065	0.367533	0.686535	0.33051	-0.106323	0.35741	0.785431
CL16949.Contig3_DB	1	turquoise	0.832902	0.909427	0.00531113	0.000673214	0.544426	0.962515	0.129642	3.23674e-05	0.765059	0.0303289	0.016304	0.938262	-0.229369	0.85414	0.552736	0.00337338	0.772156	0.71632	0.0147549	0.0299349	0.598279	0.154371	0.0887765	0.691697	-0.424648	0.840006	0.254594	0.00459559	0.0973255	0.97549	0.803288	7.40998e-06	-0.606009	0.0591872	0.0836676	0.879776	0.558474	0.470138	0.11808	0.20158	-0.2175	0.801092	0.574009	0.00945601	-0.42544	0.845911	0.253613
CL17518.Contig3_DB	1	turquoise	0.667009	0.526194	0.0497068	0.14561	0.161983	0.398332	0.677142	0.288307	0.666931	0.626749	0.0497436	0.0708742	-0.416059	0.582299	0.265355	0.0999325	0.67774	-0.188129	0.0448488	0.62787	0.193468	0.853036	0.617957	0.00345968	-0.458373	0.633543	0.214642	0.0669673	0.281086	0.277688	0.46375	0.469401	-0.166004	0.383622	0.66949	0.3081	0.174268	-0.35325	0.653846	0.351059	-0.407691	-0.0207072	0.276066	0.957831	-0.432344	-0.107048	0.245152
Unigene39729_DB	1	turquoise	0.925504	0.713959	0.000345234	0.0307371	0.210318	0.768045	0.587024	0.0156397	0.863336	-0.128483	0.00271124	0.74183	-0.597538	0.633889	0.0892761	0.0667719	0.909636	0.717854	0.00066794	0.0294207	0.253302	0.0892618	0.510778	0.81936	-0.112213	0.639306	0.773786	0.0637617	0.116494	0.79642	0.765348	0.0102063	-0.290404	-0.150709	0.448409	0.698729	0.215447	0.52938	0.577719	0.142741	-0.642308	0.783802	0.0621307	0.0124316	-0.0919875	0.784699	0.813921
CL8106.Contig4_DB	1	turquoise	-0.719407	-0.85532	0.0289064	0.00328278	-0.582211	-0.83989	0.0999963	0.00460666	-0.654313	-0.332912	0.055873	0.381352	0.059861	-0.832831	0.878416	0.00531868	-0.658028	-0.329484	0.0540212	0.386575	-0.615138	-0.354746	0.0778741	0.348879	0.0821287	-0.788322	0.833626	0.0116003	-0.0694322	-0.820462	0.859121	0.00674123	0.663796	-0.375107	0.0512241	0.319863	-0.57655	-0.0720428	0.104144	0.853869	0.0935592	-0.418902	0.810788	0.261767	0.0738723	-0.555109	0.850191
CL7093.Contig1_DB	1	turquoise	-0.798536	0.908509	0.00986173	0.000696753	-0.824736	0.878671	0.00622361	0.00181571	-0.855654	0.489384	0.00325746	0.181192	-0.209921	0.916635	0.587747	0.000507283	-0.798337	0.251758	0.00989379	0.513446	-0.852783	0.44172	0.00347968	0.233908	0.525019	0.885683	0.146677	0.00148471	-0.712451	0.846361	0.0312573	0.00401395	0.821161	0.562074	0.00665471	0.11522	-0.844627	-0.0173686	0.00416733	0.964626	-0.184091	0.373122	0.635404	0.322637	0.517739	0.480697	0.153387
Unigene30585_DB	1	turquoise	0.762267	-0.811918	0.0169421	0.00786234	0.100827	-0.826631	0.796329	0.00600302	0.71295	-0.193553	0.0310845	0.617801	-0.509491	-0.762543	0.161201	0.0168782	0.769742	-0.448902	0.0152701	0.225488	0.118532	-0.23429	0.761338	0.544005	0.270195	-0.722843	0.481959	0.0277889	0.0849936	-0.831349	0.827891	0.0054771	-0.187327	-0.275028	0.629364	0.473843	0.103249	-0.214437	0.791522	0.579548	-0.597335	-0.526946	0.0894127	0.14493	0.277816	-0.653189	0.469187
CL20309.Contig1_DB	1	turquoise	0.646154	0.84769	0.0600801	0.00389908	0.00962275	0.760357	0.980398	0.017388	0.648361	0.57556	0.0589233	0.10488	-0.521968	0.884042	0.149468	0.00155806	0.681258	0.119141	0.0433251	0.76014	0.043383	0.790106	0.911759	0.0112829	-0.25482	0.911229	0.50816	0.000628624	0.264396	0.661215	0.491776	0.052464	-0.0413288	0.388986	0.915925	0.300805	0.0247441	-0.142372	0.949617	0.714816	-0.557675	0.291029	0.11872	0.447389	-0.23772	0.255322	0.53795
Unigene31700_DB	1	turquoise	0.815437	0.730096	0.00738635	0.0255245	0.319142	0.803683	0.402533	0.0090563	0.840575	-0.0318502	0.00454131	0.93517	-0.366549	0.67149	0.331906	0.0476394	0.835096	0.587347	0.00508263	0.0963207	0.370521	-0.127249	0.32629	0.744242	-0.611622	0.611642	0.0800749	0.0800626	0.50357	0.861601	0.166949	0.0028286	-0.326894	0.164379	0.390544	0.67258	0.345778	0.406069	0.362049	0.278168	-0.373226	0.610437	0.322491	0.0808257	-0.596803	0.772076	0.089773
CL21796.Contig1_DB	1	turquoise	-0.821679	0.628243	0.006591	0.0700031	-0.227295	0.701949	0.556433	0.0350371	-0.82933	-0.161044	0.00569821	0.678933	0.445164	0.569295	0.22985	0.109611	-0.844985	0.62198	0.00413532	0.0736991	-0.274298	-0.0763059	0.475066	0.845303	0.303645	0.563171	0.426997	0.114357	-0.46645	0.73351	0.205625	0.024502	0.257524	-0.121535	0.503512	0.755439	-0.256925	0.524186	0.50454	0.147436	0.484153	0.667189	0.186612	0.0496229	0.296876	0.69887	0.437886
CL24554.Contig1_DB	1	turquoise	0.900749	0.8605	0.000919279	0.00290484	0.33714	0.852448	0.374958	0.00350626	0.899736	0.305912	0.000951563	0.423378	-0.373131	0.843875	0.322624	0.0042351	0.921568	0.368752	0.000411797	0.328785	0.37042	0.286275	0.326432	0.455179	-0.109403	0.798863	0.779337	0.00980912	0.390694	0.839741	0.2985	0.00462096	-0.399871	0.354443	0.286275	0.34932	0.350587	0.113813	0.354958	0.77063	-0.452126	0.448724	0.221764	0.225695	-0.10031	0.576194	0.797355
CL29052.Contig2_DB	1	turquoise	-0.609195	0.759918	0.0816166	0.0174916	-0.207561	0.837254	0.592047	0.00486437	-0.475913	-0.195	0.195333	0.615123	0.464779	0.696685	0.207473	0.0370382	-0.51596	0.81422	0.155053	0.00754868	-0.258017	0.0513119	0.502667	0.895697	0.349469	0.722945	0.3566	0.0277564	0.400374	0.856052	0.285612	0.00322743	0.282884	-0.257348	0.460773	0.503813	-0.200108	0.651377	0.605702	0.0573651	0.409729	0.892189	0.273436	0.00121739	0.337898	0.832266	0.373816
CL3036.Contig3_DB	1	turquoise	0.808915	0.548702	0.00828451	0.126054	0.205651	0.593925	0.595537	0.0917358	0.788544	-0.0334385	0.0115605	0.931943	-0.506225	0.531563	0.164357	0.140794	0.808441	0.42718	0.00835246	0.251466	0.255942	-0.0153136	0.506229	0.968809	-0.408307	0.477833	0.275269	0.193282	0.316763	0.62551	0.406247	0.0716014	-0.237687	0.0152375	0.538008	0.968964	0.224571	0.227884	0.5613	0.555382	-0.514921	0.428643	0.156032	0.249669	-0.3863	0.546528	0.304447
CL14948.Contig1_DB	1	turquoise	0.83639	0.479166	0.00495092	0.191864	0.682541	0.346962	0.042778	0.360298	0.894018	0.776711	0.00114877	0.0138144	0.0359606	0.531367	0.926821	0.140969	0.850175	-0.314242	0.00369036	0.410198	0.708527	0.768555	0.0326367	0.015528	-0.524444	0.538126	0.147201	0.135036	0.687257	0.261952	0.0408048	0.495937	-0.677595	0.750228	0.0449125	0.0198833	0.697808	-0.527426	0.0366054	0.144497	0.00728818	-0.170819	0.985153	0.660362	-0.505097	-0.143338	0.165456
CL14447.Contig1_DB	1	turquoise	0.731723	0.905616	0.0250338	0.000774714	0.282236	0.873366	0.461845	0.00209773	0.669418	0.434122	0.0485884	0.242998	-0.373686	0.903793	0.321847	0.000826833	0.698885	0.353008	0.0361932	0.351412	0.308729	0.525804	0.4189	0.145964	-0.18809	0.920902	0.627944	0.000423866	-0.079508	0.823951	0.838879	0.00631655	-0.349374	0.405292	0.35674	0.279177	0.273988	0.103337	0.475584	0.791349	-0.389925	0.50745	0.299536	0.163169	-0.175155	0.496991	0.652175
Unigene37410_DB	1	turquoise	0.407416	0.745495	0.276422	0.0211265	0.265089	0.615226	0.490598	0.0778196	0.327969	0.809402	0.388895	0.00821496	-0.162559	0.820865	0.676045	0.00669124	0.348105	-0.156663	0.358609	0.687303	0.319044	0.835626	0.402686	0.00502844	-0.153251	0.830698	0.693845	0.00554781	-0.0384413	0.509843	0.921784	0.160863	-0.326562	0.69507	0.391055	0.0376667	0.290373	-0.431349	0.448459	0.246362	-0.149264	0.00740859	0.701512	0.984908	-0.175584	0.00997092	0.651366
CL9877.Contig1_DB	1	turquoise	0.868966	0.828884	0.0023535	0.00574786	0.216943	0.769094	0.575016	0.0154107	0.822097	0.497792	0.00653987	0.17267	-0.581662	0.837281	0.100394	0.00486168	0.849829	0.154054	0.00371895	0.692304	0.277131	0.610527	0.47033	0.080768	-0.511834	0.819776	0.158959	0.00682695	0.169386	0.700119	0.663073	0.0357245	-0.261935	0.429488	0.495966	0.248634	0.235397	-0.105807	0.542048	0.786452	-0.571208	0.282952	0.108153	0.46066	-0.496109	0.356801	0.174358
CL4254.Contig1_DB	1	turquoise	0.733184	0.850013	0.0245984	0.00370371	0.108707	0.742222	0.780713	0.0220157	0.745083	0.714305	0.0212373	0.0306188	-0.50064	0.903553	0.169836	0.000833877	0.763602	-0.00740341	0.016635	0.984919	0.15451	0.739596	0.691431	0.0227466	-0.360987	0.895674	0.339853	0.00108899	0.451848	0.667191	0.222083	0.049622	-0.124061	0.637434	0.750484	0.0647922	0.137713	-0.311146	0.723849	0.415074	-0.523981	0.142074	0.147623	0.715394	-0.345336	0.191361	0.362705
Unigene4255_DB	1	turquoise	0.830431	0.967421	0.00557691	1.99058e-05	0.0560092	0.920243	0.886197	0.000436083	0.799	0.520579	0.00978724	0.150749	-0.623838	0.973981	0.0725904	9.12077e-06	0.852027	0.293217	0.00353986	0.443821	0.0975762	0.586782	0.80279	0.0967209	0.0447523	0.971101	0.908983	1.31335e-05	0.282214	0.867719	0.461882	0.00242978	-0.12665	0.503192	0.745415	0.16732	0.0781109	0.00396923	0.841681	0.991914	-0.697639	0.446539	0.0366701	0.22824	0.0523338	0.487672	0.89363
CL9020.Contig2_DB	1	turquoise	0.930912	0.831946	0.000266624	0.00541294	0.686246	0.763671	0.0412226	0.0166192	0.973129	0.593176	1.02005e-05	0.0922514	-0.0241698	0.868853	0.950786	0.00236034	0.94471	0.0896467	0.000123944	0.818592	0.712131	0.549715	0.031368	0.125213	-0.32266	0.831806	0.397072	0.00542796	0.653901	0.714039	0.0560812	0.0307098	-0.711463	0.601195	0.0316009	0.0868273	0.700066	-0.212414	0.0357447	0.583215	-0.0868669	0.200907	0.824145	0.604233	-0.309049	0.309359	0.418392
CL893.Contig1_DB	1	turquoise	0.845	0.574999	0.00413402	0.105299	0.219246	0.44777	0.570863	0.226805	0.826512	0.763945	0.00601674	0.0165566	-0.500803	0.638341	0.169675	0.0642916	0.849783	-0.318893	0.00372273	0.402922	0.25503	0.685485	0.507798	0.041539	-0.337045	0.605262	0.3751	0.0841534	0.233481	0.376016	0.545438	0.318596	-0.256723	0.756315	0.504886	0.0183571	0.228453	-0.549689	0.554369	0.125234	-0.521771	-0.204863	0.149649	0.596979	-0.317369	-0.0817606	0.405298
Unigene36715_DB	1	turquoise	0.677893	0.9004	0.0447818	0.000930309	0.766612	0.852605	0.0159561	0.00349377	0.685051	0.446961	0.0417204	0.227747	0.247087	0.895156	0.521549	0.00110742	0.653878	0.313504	0.0560927	0.411358	0.78239	0.62409	0.0126991	0.0724406	-0.089394	0.90251	0.819096	0.000864976	0.439147	0.785587	0.236966	0.0120986	-0.809498	0.35139	0.00820132	0.35378	0.773635	0.035322	0.0144448	0.928117	0.189788	0.462551	0.624785	0.209952	-0.0901941	0.47121	0.817499
CL381.Contig1_DB	1	turquoise	-0.619957	0.573496	0.0749187	0.106425	-0.437736	0.545227	0.238651	0.128965	-0.610105	0.167904	0.0810365	0.665883	-0.0148186	0.552947	0.969817	0.122551	-0.62192	0.242139	0.0737354	0.530189	-0.422777	0.274376	0.256918	0.474935	-0.506881	0.527403	0.163721	0.144517	-0.258971	0.531205	0.50103	0.141112	0.514655	0.0938789	0.156283	0.810151	-0.421028	0.0604732	0.259101	0.87718	0.110851	0.293234	0.776475	0.443794	-0.521927	0.370904	0.149506
CL12945.Contig2_DB	1	turquoise	0.773973	0.590771	0.0143746	0.0939172	0.327194	0.481141	0.390084	0.189774	0.787963	0.780355	0.0116649	0.0130916	-0.222794	0.672588	0.564486	0.0471414	0.809238	-0.317215	0.0082383	0.40554	0.341694	0.631853	0.368125	0.0679262	0.213333	0.629441	0.581548	0.0693093	0.433374	0.400389	0.243904	0.285593	-0.394456	0.807831	0.293457	0.00844055	0.340427	-0.546288	0.37002	0.128072	-0.340789	-0.210011	0.369477	0.587583	0.210957	-0.0772504	0.585862
CL20153.Contig2_DB	1	turquoise	-0.434978	0.713718	0.241964	0.03082	-0.432895	0.675386	0.244484	0.0458874	-0.408087	0.481849	0.275553	0.189028	-0.116696	0.746408	0.76495	0.020883	-0.405428	0.039079	0.279	0.92049	-0.405264	0.375864	0.279213	0.318807	-0.412603	0.684997	0.269752	0.0417428	-0.0837516	0.635309	0.830377	0.0659745	0.482463	0.548917	0.188383	0.125875	-0.399772	-0.189659	0.286406	0.625024	-0.0443597	0.113494	0.909779	0.77126	-0.444166	0.282769	0.231022
CL5599.Contig2_DB	1	turquoise	0.833402	-0.609755	0.00525852	0.0812595	0.566321	-0.574943	0.111901	0.10534	0.875002	-0.411801	0.00200771	0.270778	-0.0522932	-0.621202	0.893712	0.0741666	0.860606	-0.107136	0.00289748	0.783821	0.597382	-0.440182	0.0893813	0.235734	-0.230304	-0.601162	0.551075	0.0868491	0.668135	-0.540684	0.0491822	0.13283	-0.592507	-0.448045	0.0927131	0.226485	0.598914	0.120171	0.0883498	0.758116	-0.120053	-0.204017	0.758349	0.598527	-0.2372	-0.276609	0.538867
CL25193.Contig1_DB	1	turquoise	-0.468096	0.738355	0.203813	0.0230977	-0.113556	0.75208	0.771137	0.0194103	-0.452083	0.300108	0.221813	0.432672	0.335123	0.71002	0.378002	0.0321073	-0.465292	0.341022	0.206905	0.369129	-0.168741	0.271628	0.664297	0.479548	0.55756	0.69514	0.118812	0.0376394	-0.196008	0.740111	0.61326	0.0226022	0.120362	0.437071	0.757741	0.239448	-0.152134	0.151838	0.695991	0.696559	0.297374	0.449213	0.437081	0.225128	0.569478	0.521804	0.109471
CL727.Contig3_DB	1	turquoise	0.911595	0.497496	0.00061983	0.172966	0.460789	0.415211	0.211923	0.266431	0.908981	0.469165	0.000684575	0.202642	-0.313045	0.532543	0.412081	0.139926	0.909089	-0.0627772	0.000681815	0.872531	0.517335	0.680105	0.153765	0.0438206	-0.506181	0.548446	0.1644	0.126267	0.430941	0.317081	0.246859	0.405749	-0.501414	0.289986	0.169071	0.449093	0.486545	-0.250144	0.184123	0.516241	-0.335846	0.0579071	0.376909	0.882362	-0.502168	0.0370901	0.168327
CL9902.Contig1_DB	1	turquoise	0.37891	0.646147	0.314582	0.0600842	-0.00348274	0.626296	0.992905	0.0711395	0.363673	0.187286	0.336004	0.629441	-0.379363	0.670252	0.313956	0.0482051	0.380503	0.290373	0.312382	0.448459	0.0561127	0.289096	0.885988	0.45055	-0.483787	0.659766	0.186995	0.0531684	0.210335	0.589575	0.586993	0.0947527	0.00308494	0.0481101	0.993715	0.90218	0.0440897	0.093295	0.910327	0.811314	-0.339802	0.351543	0.370956	0.353556	-0.50397	0.364809	0.166557
CL12800.Contig1_DB	1	turquoise	0.93023	0.962209	0.000275773	3.32924e-05	0.407666	0.931034	0.276098	0.000265014	0.897278	0.402411	0.00103317	0.282938	-0.379783	0.962252	0.313376	3.31615e-05	0.915982	0.409541	0.00052099	0.273679	0.439795	0.534587	0.236194	0.138123	-0.24479	0.973153	0.525553	1.01693e-05	0.205833	0.883628	0.595203	0.00157694	-0.469093	0.334282	0.202721	0.379274	0.407324	0.128225	0.27654	0.742334	-0.41932	0.557116	0.261241	0.119169	-0.223932	0.554045	0.562446
CL24939.Contig2_DB	1	turquoise	0.542139	0.869135	0.131585	0.00234334	-0.0463891	0.939703	0.905666	0.000167045	0.538731	-0.0867923	0.134512	0.824294	-0.51103	0.801523	0.159725	0.00938875	0.571559	0.793646	0.107886	0.0106705	0.000162755	0.106915	0.999668	0.784258	-0.35713	0.797971	0.345418	0.00995304	0.190504	0.957706	0.623455	4.91478e-05	0.0244854	-0.0880672	0.950144	0.821746	-0.0110107	0.570295	0.977571	0.108847	-0.517305	0.872789	0.153792	0.00213009	-0.372717	0.88941	0.323203
Unigene34637_DB	1	turquoise	0.889157	0.863527	0.00133741	0.00269853	0.754206	0.873423	0.0188768	0.00209454	0.9042	0.120775	0.000814996	0.756931	0.0425428	0.830292	0.913463	0.00559213	0.874556	0.608987	0.00203199	0.0817494	0.787405	0.387805	0.0117658	0.302404	-0.33474	0.853651	0.378581	0.00341142	0.567811	0.843659	0.11075	0.00425469	-0.787397	-0.0061718	0.0117674	0.987427	0.769624	0.359315	0.0152957	0.34226	-0.000947596	0.727267	0.99807	0.0263927	-0.325616	0.677788	0.392509
CL5538.Contig6_DB	1	turquoise	0.683871	0.878067	0.0422154	0.00184638	0.363531	0.898892	0.336207	0.000979062	0.717088	0.183539	0.0296765	0.636435	-0.138062	0.862209	0.723172	0.00278709	0.715607	0.511039	0.0301756	0.159717	0.394464	0.244774	0.293446	0.525582	-0.0513313	0.851233	0.895658	0.0036038	0.5701	0.893165	0.108996	0.00118043	-0.405201	0.20003	0.279295	0.605846	0.38512	0.285871	0.306053	0.455845	-0.224597	0.60979	0.561254	0.081237	-0.0476547	0.65535	0.903102
CL15476.Contig4_DB	1	turquoise	-0.625769	-0.793957	0.0714491	0.0106178	-0.967066	-0.742503	2.06675e-05	0.0219385	-0.653867	-0.402637	0.0560983	0.282642	-0.470853	-0.801035	0.2008	0.00946484	-0.582528	-0.252593	0.0997666	0.512003	-0.979909	-0.632928	3.71147e-06	0.0673154	0.394962	-0.819635	0.292782	0.00684467	-0.487523	-0.656973	0.18311	0.0545432	0.973747	-0.23376	9.4082e-06	0.544943	-0.96622	-0.0157401	2.25678e-05	0.967941	-0.458349	-0.394453	0.214669	0.293461	0.38697	-0.366747	0.303536
CL10631.Contig2_DB	1	turquoise	0.690386	0.915774	0.0395287	0.000525407	-0.0230368	0.870256	0.953091	0.00227639	0.573236	0.484134	0.106621	0.186632	-0.706403	0.922429	0.0333996	0.000396531	0.642713	0.260891	0.061913	0.497747	0.0289549	0.570017	0.941055	0.109059	-0.00607879	0.903771	0.987617	0.000827485	-0.219122	0.822259	0.571085	0.00652024	-0.0760411	0.460229	0.845835	0.212551	-0.0235533	-0.0379961	0.95204	0.922688	-0.722942	0.393209	0.0277572	0.295124	0.0118755	0.467938	0.97581
CL7766.Contig2_DB	1	turquoise	-0.707673	0.770916	0.032942	0.0150182	-0.532195	0.855886	0.140234	0.00323996	-0.663906	-0.223016	0.0511719	0.564088	0.0829528	0.705075	0.831976	0.0338824	-0.661079	0.796345	0.0525298	0.0102187	-0.541039	-0.0774617	0.132525	0.842983	0.144233	0.686946	0.711218	0.0409332	-0.0724835	0.893209	0.852983	0.0011788	0.58219	-0.230431	0.100011	0.550848	-0.510141	0.622234	0.160577	0.0735472	0.102939	0.831301	0.792138	0.00548232	0.111028	0.872639	0.776126
CL22560.Contig1_DB	1	turquoise	0.974985	0.764032	7.9549e-06	0.0165368	0.593512	0.689588	0.0920202	0.0398515	0.993166	0.558956	8.63127e-08	0.117694	-0.17657	0.790311	0.64951	0.0112469	0.984402	0.062973	1.53687e-06	0.872136	0.630423	0.510089	0.0687444	0.160627	-0.301899	0.774263	0.429793	0.0143147	0.57593	0.655849	0.104605	0.0551027	-0.634821	0.57626	0.0662478	0.104359	0.613177	-0.179497	0.0790968	0.644008	-0.237442	0.183259	0.538441	0.63696	-0.292499	0.261902	0.444991
Unigene39363_DB	1	turquoise	0.888809	0.655711	0.00135169	0.0551718	0.523923	0.520443	0.147676	0.150875	0.913695	0.806871	0.00057101	0.00858054	-0.160855	0.736231	0.679293	0.0237065	0.907491	-0.303058	0.000723542	0.427936	0.5638	0.706071	0.113864	0.0335199	-0.208346	0.705477	0.590617	0.0337358	0.606288	0.437951	0.083487	0.238394	-0.566201	0.763243	0.111993	0.016717	0.552964	-0.54663	0.122537	0.127785	-0.232674	-0.182688	0.546867	0.638027	-0.212275	-0.0736657	0.583468
CL2846.Contig1_DB	1	turquoise	-0.571513	0.880494	0.107922	0.00172517	-0.0828355	0.873637	0.832211	0.00208261	-0.55408	0.289263	0.121626	0.450276	0.342561	0.849359	0.366832	0.00375799	-0.598639	0.487457	0.0885342	0.183178	-0.115347	0.446635	0.767607	0.228128	-0.258072	0.87656	0.502572	0.00192455	-0.266192	0.835861	0.488726	0.00500446	0.157532	0.253348	0.685641	0.510699	-0.114335	0.260774	0.769602	0.497947	0.437384	0.635765	0.239073	0.0657197	-0.233087	0.600164	0.546136
CL3837.Contig2_DB	1	turquoise	0.769345	0.623255	0.0153561	0.0729375	0.297405	0.686868	0.437031	0.0409654	0.829827	-0.15416	0.00564319	0.6921	-0.219839	0.584337	0.569794	0.0984644	0.833884	0.590273	0.00520798	0.0942643	0.309075	-0.148839	0.418351	0.70233	0.0769895	0.53787	0.843931	0.135258	0.697494	0.737367	0.036726	0.0233796	-0.323173	-0.112009	0.396278	0.774189	0.318834	0.423455	0.403013	0.256074	-0.330895	0.5862	0.384422	0.0971341	0.0871823	0.68884	0.823515
CL23678.Contig1_DB	1	turquoise	0.805869	-0.743722	0.00872813	0.0216053	0.560234	-0.803836	0.116676	0.00903312	0.827911	0.0319263	0.00585718	0.935015	-0.0617459	-0.70871	0.874611	0.0325715	0.810013	-0.596524	0.00812843	0.0899618	0.564838	0.037544	0.113053	0.923606	-0.218141	-0.679688	0.572854	0.044001	0.441098	-0.836151	0.234646	0.00497514	-0.577408	-0.0401859	0.103509	0.918244	0.556254	-0.424455	0.119864	0.254833	-0.106107	-0.639256	0.785858	0.0637893	-0.18982	-0.715308	0.624725
CL14092.Contig1_DB	1	turquoise	0.635592	0.830639	0.065816	0.00555416	-0.0273176	0.730285	0.944384	0.0254672	0.628721	0.76221	0.0697257	0.0169553	-0.472171	0.879695	0.199368	0.00176444	0.682975	-0.0439391	0.0425938	0.910632	-0.0200467	0.755575	0.959175	0.0185383	0.458432	0.874872	0.214576	0.00201476	0.266513	0.6416	0.488183	0.0625132	-0.0488718	0.735608	0.900637	0.0238872	-0.0224971	-0.322812	0.954189	0.396837	-0.600483	0.119761	0.0873011	0.758923	0.469039	0.16787	0.20278
CL3949.Contig1_DB	1	turquoise	0.777787	0.84284	0.0135983	0.00432958	0.760176	0.925559	0.0174306	0.000344366	0.85176	-0.122752	0.00356131	0.753051	0.227418	0.78082	0.556213	0.0130011	0.805765	0.761606	0.00874361	0.0170953	0.766443	-0.0385224	0.0159937	0.92162	-0.19829	0.746039	0.60905	0.0209812	0.73108	0.963106	0.0252268	3.06332e-05	-0.773531	-0.0624245	0.0144666	0.873242	0.770114	0.552749	0.0151899	0.122714	0.144407	0.804809	0.710881	0.00888632	-0.190148	0.893098	0.624116
CL6075.Contig1_DB	1	turquoise	0.506767	0.892627	0.163831	0.00120072	-0.0770679	0.932983	0.843774	0.000240183	0.515657	0.0327129	0.155339	0.933417	-0.419774	0.844837	0.260672	0.00414856	0.560915	0.683717	0.116136	0.0422803	-0.0775725	0.27798	0.842761	0.468914	0.25973	0.859276	0.499732	0.00299131	0.170985	0.915597	0.660046	0.000529175	0.026719	-0.0432322	0.945601	0.912065	-0.074897	0.468172	0.848133	0.20373	-0.515361	0.794784	0.155616	0.0104783	0.26569	0.775265	0.489578
Unigene32145_DB	1	turquoise	0.534477	0.692318	0.13822	0.0387536	0.0546325	0.634414	0.88898	0.0664762	0.498632	0.469103	0.171832	0.20271	-0.391066	0.727134	0.298	0.0264339	0.530289	0.0477672	0.141928	0.902874	0.0584391	0.351151	0.881287	0.35413	0.169952	0.674087	0.662003	0.0464665	0.00145083	0.606489	0.997044	0.083357	-0.113575	0.492262	0.7711	0.178249	0.028774	-0.186497	0.941422	0.630912	-0.450408	0.11253	0.223745	0.773162	0.21002	0.254971	0.587568
CL11086.Contig1_DB	1	turquoise	0.93095	0.848286	0.000266123	0.0038483	0.683954	0.901471	0.0421805	0.000896731	0.953223	-0.00832053	6.96174e-05	0.983051	-0.0495986	0.797958	0.899165	0.00995503	0.931286	0.690222	0.000261707	0.0395948	0.720617	0.17377	0.0285096	0.654786	-0.316641	0.81034	0.406436	0.00808228	0.618301	0.900434	0.075926	0.000929229	-0.717416	-0.0332172	0.0295668	0.932393	0.70661	0.504549	0.0333247	0.165991	-0.102949	0.790172	0.792118	0.0112714	-0.312126	0.777648	0.413527
Unigene33020_DB	1	turquoise	0.812851	0.653982	0.00773412	0.0560402	0.0187855	0.516625	0.961742	0.154429	0.737169	0.752146	0.0234364	0.0193936	-0.746364	0.701686	0.0208945	0.0351353	0.793067	-0.181753	0.0107691	0.639778	0.0755828	0.872819	0.846755	0.00212839	-0.33649	0.721916	0.375936	0.0280876	-0.0294373	0.403771	0.940074	0.28116	-0.0833701	0.595392	0.831141	0.090732	0.0322205	-0.417332	0.934418	0.263745	-0.743043	-0.0160331	0.0217903	0.967345	-0.322012	-0.0264175	0.398074
CL755.Contig3_DB	1	turquoise	0.874317	-0.833618	0.00204507	0.00523578	0.216492	-0.779692	0.57583	0.0132211	0.862678	-0.42265	0.00275534	0.257075	-0.532148	-0.835556	0.140275	0.00503558	0.8846	-0.225858	0.00153285	0.558999	0.267293	-0.565314	0.486861	0.112682	-0.420937	-0.818752	0.259214	0.00695631	0.329461	-0.730114	0.386611	0.0255189	-0.253693	-0.340051	0.510102	0.370583	0.238205	0.0490148	0.537097	0.900348	-0.552662	-0.343907	0.122785	0.364828	-0.40807	-0.41338	0.275576
CL2970.Contig1_DB	1	turquoise	0.841055	0.860375	0.00449585	0.00291363	0.72034	0.854288	0.0285999	0.00336189	0.90106	0.281649	0.00090952	0.462817	0.100595	0.833663	0.796789	0.00523114	0.861802	0.445426	0.00281484	0.229542	0.746717	0.476401	0.0208008	0.194811	-0.326111	0.85433	0.391747	0.00335866	0.764458	0.801889	0.01644	0.00933176	-0.732634	0.21691	0.0247618	0.575076	0.744205	0.228342	0.0214741	0.554566	0.0380232	0.589676	0.922633	0.0946819	-0.320719	0.568603	0.400081
CL23910.Contig1_DB	1	turquoise	0.836076	0.926457	0.00498265	0.00033034	0.84067	0.878516	0.00453222	0.0018235	0.843037	0.397597	0.00431141	0.28928	0.160856	0.939305	0.679291	0.000170869	0.803886	0.35574	0.00902557	0.347434	0.871828	0.635165	0.0021848	0.0660551	-0.344061	0.963732	0.364598	2.88697e-05	0.491079	0.810475	0.179455	0.00806326	-0.878146	0.225683	0.00184233	0.559312	0.84914	0.0810821	0.00377635	0.835723	0.124881	0.510255	0.748877	0.160468	-0.337093	0.472255	0.375028
CL22617.Contig1_DB	1	turquoise	0.922689	0.817918	0.000392	0.00706283	0.712827	0.898318	0.0311271	0.000998063	0.932577	-0.188518	0.000245215	0.627147	-0.0151201	0.743953	0.969204	0.0215424	0.91281	0.811756	0.000591242	0.00788465	0.734074	0.021496	0.0243356	0.956226	-0.249351	0.728098	0.517616	0.0261357	0.456496	0.924865	0.216769	0.000355496	-0.757588	-0.211483	0.0180482	0.584906	0.714983	0.607029	0.0303875	0.0830076	-0.0728382	0.862819	0.85227	0.00274586	-0.235031	0.902962	0.542694
CL1569.Contig3_DB	1	turquoise	0.854704	0.867096	0.0033299	0.00246844	0.702015	0.926547	0.0350124	0.000328954	0.921077	-0.0617187	0.000420667	0.874666	0.0631103	0.801365	0.871859	0.00941332	0.879294	0.76067	0.00178438	0.0173144	0.731599	0.134816	0.025071	0.729481	-0.468889	0.79348	0.202945	0.0106986	0.744354	0.936735	0.0214339	0.000197059	-0.7061	-0.0862854	0.0335092	0.825308	0.726472	0.532112	0.0266402	0.140307	0.0147889	0.836584	0.969878	0.00493146	-0.464565	0.861041	0.20771
Unigene32180_DB	1	turquoise	0.829032	0.935493	0.00573129	0.000210666	0.206518	0.974568	0.593953	8.42526e-06	0.824373	0.0642554	0.00626655	0.869549	-0.44288	0.878346	0.232537	0.00183216	0.859125	0.694488	0.00300208	0.0378948	0.243781	0.246766	0.527316	0.522108	-0.0426983	0.872844	0.913148	0.00212703	0.356947	0.973382	0.345682	9.87041e-06	-0.272933	0.0479182	0.477355	0.902568	0.228593	0.446212	0.554119	0.228623	-0.525609	0.795413	0.14614	0.0103732	-0.0441563	0.826574	0.910192
CL27705.Contig1_DB	1	turquoise	0.950556	-0.958205	8.43076e-05	4.71718e-05	0.4649	-0.90465	0.207339	0.00080204	0.924995	-0.467298	0.000353387	0.204691	-0.33259	-0.967006	0.381842	2.08002e-05	0.939647	-0.294641	0.000167579	0.441507	0.516357	-0.586097	0.15468	0.0972077	-0.237535	-0.953199	0.538277	6.97427e-05	0.390166	-0.852596	0.299211	0.00349447	-0.53057	-0.385577	0.141678	0.305431	0.487627	0.00917223	0.183003	0.981316	-0.383171	-0.427615	0.308718	0.250932	-0.234188	-0.486806	0.544186
CL12450.Contig3_DB	1	turquoise	0.949106	0.796443	9.31513e-05	0.0102026	0.346214	0.728461	0.361404	0.0260239	0.898685	0.481597	0.000985877	0.189293	-0.493147	0.830914	0.177349	0.00552431	0.924273	0.105456	0.000365172	0.787148	0.393543	0.510781	0.294678	0.159964	-0.324339	0.793041	0.394476	0.0107734	0.176503	0.687573	0.649636	0.0406746	-0.410282	0.419755	0.272725	0.260695	0.351674	-0.17501	0.353364	0.652448	-0.515014	0.198404	0.155944	0.608839	-0.302123	0.310073	0.429435
CL3796.Contig5_DB	1	turquoise	-0.664825	0.851632	0.0507353	0.00357155	-0.615439	0.853011	0.0776872	0.00346163	-0.765346	0.326401	0.0162394	0.391302	-0.195475	0.833921	0.614244	0.00520415	-0.716709	0.342712	0.0298036	0.366606	-0.607224	0.235602	0.082882	0.541687	0.24674	0.781059	0.522153	0.0129549	-0.768211	0.86012	0.0156031	0.00293154	0.592952	0.46564	0.0924055	0.20652	-0.625336	0.0935645	0.0717041	0.810777	-0.128322	0.422753	0.742146	0.256948	0.231036	0.582151	0.549773
CL11279.Contig1_DB	1	turquoise	0.795584	0.844335	0.0103447	0.00419355	0.147077	0.847169	0.705726	0.00394382	0.774962	0.282002	0.0141706	0.462234	-0.457526	0.822608	0.215601	0.00647784	0.823116	0.355903	0.00641651	0.347197	0.169476	0.254653	0.662904	0.508448	0.283877	0.762397	0.459132	0.016912	0.313343	0.843071	0.411612	0.00430835	-0.227968	0.369291	0.555233	0.328024	0.160261	0.0999642	0.680425	0.798043	-0.568056	0.424957	0.110561	0.25421	0.290334	0.59393	0.448524
CL10224.Contig2_DB	1	turquoise	0.837519	-0.608217	0.00483805	0.0822429	0.667704	-0.724041	0.0493828	0.0274061	0.796948	0.363032	0.0101197	0.336921	-0.0742764	-0.53187	0.849379	0.140522	0.78338	-0.762351	0.0125111	0.0169226	0.708083	0.288777	0.0327952	0.451071	-0.341649	-0.476816	0.368192	0.194367	0.233483	-0.790854	0.545433	0.0111515	-0.725793	0.287415	0.0268528	0.453306	0.666297	-0.622671	0.0500408	0.0732858	-0.0901825	-0.738879	0.817522	0.0229491	-0.324127	-0.862253	0.394805
Unigene38728_DB	1	turquoise	0.950362	-0.562351	8.54539e-05	0.115002	0.412972	-0.453875	0.26928	0.219757	0.898379	-0.53231	0.000996021	0.140131	-0.4234	-0.585611	0.256143	0.097554	0.920025	0.0599953	0.000440157	0.878145	0.458564	-0.738146	0.214427	0.023157	-0.304304	-0.62526	0.425944	0.0717486	0.192449	-0.355841	0.619846	0.347286	-0.475758	-0.331959	0.1955	0.382802	0.421943	0.225818	0.257958	0.559071	-0.443657	-0.0908868	0.231621	0.816117	-0.288405	-0.0336026	0.451682
CL1395.Contig2_DB	1	turquoise	0.943517	0.905985	0.000133404	0.000764436	0.370912	0.888994	0.325739	0.00134407	0.920489	0.271894	0.000431497	0.4791	-0.422991	0.889787	0.256652	0.0013118	0.941277	0.489113	0.000152517	0.181471	0.416317	0.536878	0.265029	0.13612	-0.274651	0.919699	0.474473	0.000446331	0.324836	0.839485	0.393711	0.00464566	-0.433236	0.138353	0.24407	0.722608	0.383648	0.229752	0.308064	0.552056	-0.470633	0.637706	0.20104	0.0646418	-0.25901	0.587248	0.500965
CL16008.Contig1_DB	1	turquoise	0.550819	0.808233	0.1243	0.00838246	-0.0370571	0.907682	0.924594	0.000718466	0.497754	-0.173826	0.172708	0.65468	-0.481345	0.728395	0.189559	0.0260443	0.561841	0.810547	0.115404	0.00805322	-0.00353384	-0.0956798	0.992801	0.806564	0.352639	0.701237	0.351953	0.0353034	0.0805552	0.953269	0.836779	6.93848e-05	-0.0575179	-0.0722315	0.883148	0.853489	-0.0178346	0.628615	0.963677	0.0697873	-0.57294	0.856129	0.106843	0.00322167	0.340778	0.93095	0.369495
CL3732.Contig4_DB	1	turquoise	0.929067	-0.636172	0.000291854	0.0654928	0.396962	-0.545206	0.290122	0.128983	0.863867	-0.562551	0.00267596	0.114845	-0.404515	-0.71646	0.280189	0.0298875	0.896525	0.114869	0.0010591	0.768548	0.432939	-0.563887	0.244431	0.113796	-0.0516365	-0.69185	0.895041	0.0389406	0.125814	-0.471333	0.74705	0.200278	-0.480863	-0.442743	0.190068	0.232699	0.399594	0.339949	0.286641	0.370736	-0.453141	0.0221916	0.220598	0.95481	-0.0381455	-0.0468284	0.922385
CL4156.Contig1_DB	1	turquoise	0.737968	0.779274	0.0232079	0.0133033	0.115438	0.847568	0.767428	0.00390949	0.645513	-0.00340794	0.0604191	0.993057	-0.628829	0.721257	0.0696629	0.0283013	0.687356	0.644204	0.0407642	0.0611148	0.183269	-0.00837739	0.636941	0.982935	-0.441249	0.6774	0.234467	0.0449977	-0.100983	0.886038	0.796019	0.00146918	-0.180933	0.135058	0.641315	0.729011	0.128544	0.419329	0.741712	0.261231	-0.598457	0.688161	0.0886569	0.0404335	-0.431751	0.800715	0.245873
CL17912.Contig3_DB	1	turquoise	0.647015	0.44828	0.0596272	0.226211	0.376282	0.421953	0.318226	0.257945	0.633113	0.399955	0.0672106	0.286165	-0.205652	0.482571	0.595535	0.18827	0.630558	-0.00833222	0.0686665	0.983027	0.439696	0.244159	0.236311	0.526655	-0.484856	0.459853	0.185879	0.212974	0.369344	0.413293	0.327949	0.268871	-0.405251	0.532846	0.279231	0.139658	0.414483	-0.161224	0.267355	0.678588	-0.200655	0.0624097	0.604696	0.873272	-0.495706	0.140575	0.174763
CL139.Contig12_DB	1	turquoise	-0.737535	0.767106	0.0233315	0.0158465	0.0584054	0.640873	0.881355	0.062907	-0.691097	0.731625	0.0392424	0.025063	0.735987	0.828312	0.023777	0.00581195	-0.739952	-0.096983	0.0226466	0.80397	0.0109353	0.767176	0.977725	0.0158312	0.340058	0.82427	0.370573	0.00627873	-0.0426483	0.554552	0.913249	0.121243	-0.00935639	0.609084	0.980941	0.0816876	0.0522586	-0.380519	0.893782	0.312361	0.742177	0.0459718	0.0220281	0.906512	0.312825	0.0822966	0.412427
CL7738.Contig4_DB	1	turquoise	-0.731612	0.646273	0.0250671	0.0600176	-0.522569	0.71164	0.148915	0.0315389	-0.74309	-0.179407	0.0217775	0.644176	0.0313912	0.591646	0.936103	0.093309	-0.730891	0.674754	0.0252838	0.0461685	-0.521339	-0.0874357	0.150047	0.823008	-0.0165659	0.570796	0.96626	0.108466	-0.392488	0.748126	0.29609	0.0204294	0.560569	-0.185408	0.11641	0.632943	-0.506711	0.511929	0.163885	0.158868	0.103882	0.693721	0.790266	0.038197	-0.0535328	0.733938	0.891204
CL15785.Contig1_DB	1	turquoise	-0.73175	0.882964	0.0250255	0.0016076	-0.244601	0.858204	0.525883	0.00306849	-0.684216	0.460025	0.0420702	0.212781	0.37413	0.876147	0.321226	0.00194634	-0.716233	0.252679	0.0299641	0.511853	-0.25824	0.38997	0.502284	0.299476	-0.00963754	0.833671	0.980368	0.00523031	0.00223512	0.837031	0.995447	0.00488666	0.317705	0.568145	0.404775	0.110493	-0.226219	-0.00795754	0.558354	0.98379	0.427179	0.361378	0.251467	0.339292	-0.0368427	0.50171	0.92503
CL11737.Contig1_DB	1	turquoise	0.797865	0.808331	0.00997021	0.00836829	0.633689	0.812145	0.0668847	0.007831	0.824592	0.327909	0.00624056	0.388987	0.0489077	0.787456	0.900564	0.0117566	0.80991	0.30743	0.00814291	0.420962	0.64848	0.229615	0.0588614	0.552299	-0.0766794	0.72773	0.844553	0.0262492	0.544513	0.818238	0.129568	0.00702181	-0.671941	0.48806	0.0474345	0.182556	0.650117	0.0633293	0.0580126	0.871417	-0.0280184	0.381266	0.942959	0.311332	-0.0784811	0.557839	0.840938
CL22866.Contig2_DB	1	turquoise	0.483548	0.873442	0.187245	0.00209349	0.152339	0.90127	0.695597	0.000902956	0.416804	0.186607	0.264413	0.630706	-0.291986	0.840648	0.445827	0.00453434	0.451888	0.518666	0.222038	0.152523	0.164483	0.215509	0.672381	0.577608	-0.0353359	0.823381	0.928089	0.00638474	-0.175613	0.894304	0.651311	0.00113828	-0.203846	0.247266	0.598841	0.521238	0.148346	0.308509	0.703279	0.419248	-0.295066	0.616661	0.440818	0.0769324	-0.0327466	0.681967	0.933349
CL482.Contig2_DB	1	turquoise	-0.888349	0.934659	0.0013707	0.000220173	-0.615576	0.912225	0.0776022	0.00060489	-0.848004	0.383708	0.00387227	0.307982	0.124021	0.924569	0.750563	0.000360308	-0.851257	0.388815	0.00360189	0.301036	-0.638399	0.403366	0.0642599	0.281689	0.0592894	0.908276	0.87957	0.000702815	-0.206067	0.891665	0.594776	0.0012376	0.692731	0.407699	0.0385893	0.276056	-0.606191	0.116851	0.0835498	0.764646	0.183546	0.508522	0.636422	0.162134	0.041368	0.576149	0.915846
CL28463.Contig1_DB	1	turquoise	0.952808	0.75985	7.17748e-05	0.0175076	0.645296	0.859311	0.0605339	0.00298885	0.981084	-0.183676	3.00881e-06	0.636179	-0.0923369	0.687717	0.813224	0.0406154	0.963881	0.787667	2.84611e-05	0.0117185	0.676099	-0.0750217	0.0455711	0.847882	-0.29333	0.672527	0.443638	0.0471691	0.594485	0.901785	0.091352	0.000887032	-0.68167	-0.0999245	0.0431489	0.798122	0.662843	0.617018	0.0516797	0.0767129	-0.156229	0.838657	0.688136	0.00472606	-0.286465	0.884139	0.454867
CL21517.Contig1_DB	1	turquoise	0.799812	0.857479	0.00965772	0.0031214	0.12512	0.791036	0.748409	0.0111198	0.695981	0.641742	0.0373116	0.0624363	-0.661165	0.876552	0.0524882	0.00192498	0.746612	0.0998967	0.0208286	0.798177	0.182396	0.615375	0.638573	0.0777268	-0.292999	0.864745	0.444177	0.0026184	-0.140336	0.73357	0.718761	0.0244841	-0.203542	0.68918	0.599397	0.0400173	0.127463	-0.169868	0.743825	0.662161	-0.648646	0.251874	0.0587748	0.513245	-0.272733	0.323261	0.477691
CL2258.Contig1_DB	1	turquoise	-0.727744	0.935236	0.026245	0.000213565	-0.563053	0.887813	0.11445	0.00139314	-0.742292	0.533885	0.0219964	0.138741	-0.00777333	0.93896	0.984165	0.00017423	-0.730679	0.230648	0.0253479	0.550463	-0.591107	0.564087	0.0936833	0.11364	0.159799	0.917502	0.681308	0.000489484	-0.457378	0.836012	0.215769	0.00498919	0.599592	0.549272	0.0878956	0.12558	-0.590527	-0.0507174	0.0940874	0.896901	0.0458233	0.370359	0.906813	0.326517	0.179344	0.459967	0.644296
CL9197.Contig1_DB	1	turquoise	0.739051	-0.848618	0.0229003	0.0038202	0.278089	-0.771364	0.468732	0.0149226	0.701459	-0.589062	0.0352203	0.0951125	-0.291898	-0.896223	0.44597	0.00106965	0.739012	-0.0576516	0.0229115	0.882878	0.285157	-0.584341	0.45702	0.098462	0.34644	-0.869354	0.36107	0.00233011	0.151829	-0.71458	0.696577	0.0305246	-0.368562	-0.54334	0.329054	0.130562	0.268232	0.21722	0.485274	0.574515	-0.398325	-0.17881	0.288316	0.645298	0.363051	-0.272005	0.336894
CL12139.Contig3_DB	1	turquoise	0.273939	0.765973	0.475667	0.0160987	0.238104	0.747837	0.537274	0.0205051	0.33328	0.24417	0.380794	0.526635	0.0295041	0.7427	0.939938	0.0218844	0.293474	0.442936	0.443404	0.232471	0.243848	0.480105	0.527199	0.190869	-0.49244	0.80021	0.178068	0.00959474	0.385936	0.701892	0.304942	0.0350582	-0.182303	0.128121	0.638747	0.742538	0.248293	0.259873	0.519453	0.499487	0.0612392	0.598524	0.875634	0.0886113	-0.476823	0.48969	0.194359
CL21283.Contig2_DB	1	turquoise	0.958022	0.916566	4.78915e-05	0.000508704	0.396704	0.86941	0.290464	0.0023268	0.965361	0.449912	2.46213e-05	0.224318	-0.38102	0.922874	0.311671	0.000388792	0.975502	0.309911	7.3976e-06	0.417027	0.441563	0.625871	0.234094	0.0713887	-0.358511	0.928417	0.343419	0.000301123	0.483816	0.797331	0.186965	0.010057	-0.437483	0.336153	0.238954	0.376446	0.42132	0.0279916	0.258735	0.943013	-0.428096	0.456895	0.25034	0.216316	-0.350496	0.464163	0.355091
Unigene38269_DB	1	turquoise	-0.101656	0.762729	0.794683	0.0168354	0.249603	0.63668	0.517179	0.06521	-0.0630372	0.781577	0.872006	0.0128548	0.319158	0.832175	0.402509	0.00538848	-0.112043	-0.139568	0.774122	0.720249	0.271493	0.780485	0.479775	0.0130662	-0.403012	0.831419	0.282151	0.0054696	0.313949	0.554051	0.410658	0.12165	-0.197519	0.703746	0.61047	0.0343702	0.281239	-0.419726	0.463497	0.260731	0.373313	0.014622	0.322369	0.970218	-0.422277	0.0513647	0.257541
CL14686.Contig3_DB	1	turquoise	0.752951	0.528186	0.0191905	0.143812	0.498872	0.492454	0.171592	0.178054	0.82492	0.452722	0.00620193	0.221079	-0.0302775	0.55188	0.938366	0.123426	0.802957	-0.0216672	0.00916717	0.955877	0.528932	0.302401	0.143142	0.428989	-0.271031	0.493787	0.480552	0.1767	0.774337	0.481709	0.0142993	0.189176	-0.509752	0.598046	0.16095	0.0889332	0.534327	-0.2396	0.138351	0.534644	-0.10464	0.03572	0.788766	0.927309	-0.276014	0.198647	0.472193
CL12745.Contig1_DB	1	turquoise	0.87048	0.777921	0.00226321	0.0135715	0.769007	0.64687	0.0154295	0.0597035	0.864422	0.74693	0.00263953	0.0207444	0.0203371	0.848814	0.958584	0.00380366	0.830576	-0.10339	0.00556107	0.791243	0.806718	0.868744	0.00860302	0.00236697	-0.559059	0.866705	0.117612	0.00249297	0.392322	0.532081	0.296313	0.140334	-0.793887	0.549899	0.0106295	0.12506	0.777266	-0.373295	0.0137025	0.322395	0.0232113	0.063355	0.952736	0.871365	-0.546087	0.0451739	0.128241
CL179.Contig2_DB	1	turquoise	0.731387	0.979162	0.0251346	4.21415e-06	0.513894	0.952784	0.157001	7.19e-05	0.760124	0.346009	0.0174428	0.361707	-0.0852591	0.968429	0.82736	1.78509e-05	0.739127	0.432736	0.0228788	0.244676	0.558712	0.514346	0.117889	0.156574	-0.604315	0.963848	0.0847718	2.85508e-05	0.470206	0.907367	0.201505	0.000726839	-0.523172	0.257183	0.148362	0.504097	0.546024	0.14886	0.128294	0.702289	-0.0895636	0.565101	0.818758	0.112849	-0.615642	0.600283	0.0775613
CL4353.Contig4_DB	1	turquoise	-0.549551	-0.551087	0.125349	0.124079	-0.00237744	-0.521057	0.995157	0.150307	-0.533944	-0.29161	0.138688	0.44644	0.494594	-0.58039	0.175884	0.101319	-0.561017	-0.129456	0.116056	0.73993	-0.0375156	-0.32974	0.923663	0.386185	0.45073	-0.545311	0.223372	0.128894	-0.119182	-0.475556	0.760059	0.195717	0.0077716	-0.221178	0.984169	0.567387	-0.0238794	0.0830013	0.951376	0.831879	0.469619	-0.178664	0.202146	0.645572	0.444389	-0.250662	0.23076
Unigene5062_DB	1	turquoise	-0.794329	-0.869367	0.0105549	0.00232934	-0.777493	-0.791556	0.013657	0.0110293	-0.778487	-0.527502	0.0134587	0.144428	-0.125529	-0.874733	0.747609	0.00202231	-0.755375	-0.214395	0.0185875	0.579624	-0.807608	-0.702913	0.00847296	0.0346785	0.214279	-0.893918	0.579835	0.00115244	-0.341954	-0.721814	0.367738	0.0281204	0.834662	-0.406097	0.00512723	0.278131	-0.785413	0.0616691	0.0121309	0.874766	-0.0825854	-0.375893	0.832712	0.318767	0.218327	-0.365044	0.572518
Unigene11238_DB	1	turquoise	0.390429	0.796417	0.298858	0.0102068	-0.0257672	0.891853	0.947536	0.00123033	0.319034	-0.176066	0.402701	0.650458	-0.426147	0.722921	0.25274	0.027764	0.363068	0.790259	0.336869	0.011256	0.025537	-0.0705011	0.948005	0.85697	-0.046476	0.697024	0.90549	0.0369071	-0.0132367	0.937449	0.973038	0.000189517	-0.0327017	-0.0948977	0.93344	0.808121	-0.00189338	0.602338	0.996143	0.0860706	-0.430212	0.835635	0.247749	0.00502745	-0.0520957	0.907815	0.894111
CL8052.Contig2_DB	1	turquoise	0.804468	0.73991	0.00893762	0.0226585	0.00425119	0.758178	0.99134	0.0179061	0.757562	0.0527701	0.0180543	0.892747	-0.721535	0.728819	0.0282108	0.0259141	0.807907	0.471434	0.0084296	0.200168	0.0661151	0.158705	0.865801	0.683397	-0.307714	0.711613	0.420511	0.0315484	0.179694	0.748938	0.643638	0.0202172	-0.0603268	-0.0260152	0.877475	0.947032	0.0308472	0.291505	0.937208	0.446612	-0.738217	0.529139	0.0231368	0.142957	-0.29765	0.57268	0.436634
CL9866.Contig1_DB	1	turquoise	0.744287	0.899337	0.021452	0.000964474	0.51783	0.937933	0.153302	0.000184525	0.756837	0.0228715	0.01823	0.953427	-0.0881066	0.858731	0.821668	0.00303039	0.741703	0.671285	0.022159	0.0477328	0.545688	0.234585	0.128576	0.543484	-0.360261	0.848089	0.340897	0.00386499	0.418252	0.929599	0.262585	0.000284412	-0.543931	-0.0512793	0.13006	0.895763	0.524968	0.424945	0.146723	0.254226	-0.118028	0.755012	0.76233	0.0186772	-0.341228	0.784884	0.368822
CL8138.Contig2_DB	1	turquoise	0.583998	0.960615	0.0987078	3.84116e-05	0.437558	0.9315	0.238865	0.000258918	0.667714	0.430538	0.0493778	0.24735	0.060357	0.965725	0.877414	2.37356e-05	0.63614	0.351538	0.0655104	0.353564	0.430956	0.458408	0.246841	0.214603	-0.254516	0.945928	0.508683	0.000114785	0.628737	0.901557	0.0697166	0.000894072	-0.413845	0.437608	0.268167	0.238805	0.448296	0.0597544	0.226193	0.878631	0.0108503	0.475593	0.977898	0.195676	-0.239084	0.548865	0.535549
CL26669.Contig1_DB	1	turquoise	-0.788281	0.76269	0.0116078	0.0168444	-0.74648	0.832606	0.0208637	0.00534254	-0.752574	-0.145828	0.0192856	0.708136	-0.0446458	0.682892	0.909199	0.0426291	-0.724936	0.756621	0.0271225	0.0182825	-0.770407	0.0206149	0.015127	0.958019	0.418198	0.666634	0.262653	0.0498823	-0.166395	0.85966	0.668747	0.00296402	0.78442	-0.139787	0.0123155	0.719824	-0.734182	0.560006	0.0243038	0.116858	-0.0521202	0.806014	0.894062	0.00870665	0.395107	0.849049	0.292589
CL7777.Contig1_DB	1	turquoise	-0.533505	0.985365	0.139075	1.23093e-06	-0.0963336	0.968388	0.805262	1.79301e-05	-0.530185	0.336859	0.142021	0.375381	0.259748	0.979695	0.4997	3.85065e-06	-0.565019	0.454843	0.112912	0.218651	-0.0957941	0.479185	0.806336	0.191843	-0.505228	0.97318	0.165327	1.01334e-05	-0.247858	0.925981	0.520208	0.00033772	0.168372	0.267136	0.664995	0.487127	-0.094654	0.168219	0.808606	0.665286	0.385327	0.583845	0.305772	0.0988175	-0.511592	0.618089	0.159189
CL7354.Contig1_DB	1	turquoise	0.7839	-0.74946	0.0124131	0.0200818	0.212311	-0.794085	0.583402	0.0105961	0.727779	0.00438212	0.0262341	0.991073	-0.529999	-0.715172	0.142187	0.0303233	0.753265	-0.560868	0.0191117	0.116173	0.261364	0.00321599	0.49694	0.993448	-0.543259	-0.674513	0.130631	0.0462762	-0.00503289	-0.822015	0.989747	0.00654992	-0.25578	-0.039674	0.506508	0.919283	0.215863	-0.366327	0.576967	0.332222	-0.503567	-0.593923	0.166952	0.0917375	-0.522948	-0.693954	0.148568
CL2142.Contig1_DB	1	turquoise	-0.451752	0.708066	0.222194	0.0328014	-0.0486774	0.674732	0.901031	0.0461783	-0.32496	0.187896	0.39352	0.628304	0.417277	0.708184	0.263814	0.032759	-0.388931	0.404356	0.300879	0.280396	-0.0827418	0.555148	0.832398	0.120758	-0.25356	0.771261	0.510332	0.0149445	0.352985	0.612141	0.351447	0.0797478	0.158216	-0.0738044	0.684332	0.850328	-0.0436442	0.206513	0.91123	0.593961	0.445758	0.545999	0.229154	0.128315	-0.252069	0.405736	0.512907
CL12592.Contig2_DB	1	turquoise	0.937132	0.927517	0.000192839	0.000314312	0.509507	0.947747	0.161185	0.000102012	0.93077	0.160328	0.000268511	0.680299	-0.271922	0.8953	0.479054	0.00110228	0.927371	0.591077	0.000316483	0.0937043	0.542618	0.349853	0.131176	0.356036	-0.363493	0.906112	0.336261	0.000760932	0.373804	0.920741	0.321682	0.00042684	-0.548673	0.103888	0.126078	0.790255	0.513079	0.36095	0.157774	0.339906	-0.304024	0.715439	0.42639	0.0302327	-0.338846	0.710259	0.372391
CL4698.Contig3_DB	1	turquoise	0.320357	0.881248	0.400643	0.00168868	-0.343933	0.805831	0.364788	0.00873389	0.267032	0.581376	0.487304	0.100601	-0.60117	0.912043	0.086844	0.000609176	0.340599	0.168545	0.369763	0.664668	-0.331162	0.72844	0.384015	0.0260304	0.532011	0.939988	0.140397	0.000164349	-0.0536172	0.719145	0.891033	0.0289928	0.270112	0.4587	0.4821	0.214273	-0.343447	-0.0898045	0.365511	0.818277	-0.684636	0.34463	0.0418941	0.363752	0.544529	0.309844	0.129554
Unigene35406_DB	1	turquoise	0.97804	0.946316	5.05796e-06	0.000111968	0.626147	0.900717	0.0712267	0.000920269	0.978857	0.5345	4.43288e-06	0.1382	-0.173477	0.956713	0.655339	5.32563e-05	0.968643	0.24302	1.74342e-05	0.528647	0.666187	0.566388	0.0500923	0.111848	-0.338249	0.939138	0.373287	0.000172488	0.489498	0.849532	0.181075	0.0037436	-0.672803	0.545171	0.0470443	0.129012	0.640058	-0.0440268	0.0633505	0.910454	-0.220812	0.385621	0.568045	0.305371	-0.325484	0.463164	0.392713
CL17.Contig2_DB	1	turquoise	-0.843436	0.962405	0.00427498	3.26985e-05	-0.360547	0.966491	0.340485	2.19477e-05	-0.853829	0.292307	0.00339752	0.445304	0.363644	0.945942	0.336045	0.000114682	-0.85035	0.490199	0.00367591	0.180356	-0.413162	0.39033	0.269038	0.29899	0.631656	0.93474	0.0680383	0.000219242	-0.414093	0.936962	0.267852	0.000194641	0.378607	0.28798	0.315001	0.452379	-0.38251	0.223959	0.309623	0.562397	0.36528	0.612406	0.333712	0.0795806	0.618114	0.66093	0.0760405
CL6055.Contig1_DB	1	turquoise	0.813932	0.923246	0.00758737	0.000382407	0.352895	0.923028	0.351578	0.000386144	0.817746	0.226091	0.00708496	0.558583	-0.252455	0.894525	0.51224	0.00113023	0.839943	0.513634	0.00460162	0.157248	0.376792	0.372533	0.317518	0.323463	0.118821	0.893071	0.76077	0.00118395	0.414101	0.892585	0.267842	0.00120231	-0.42439	0.168906	0.254913	0.663983	0.368283	0.275137	0.329449	0.47366	-0.358955	0.630655	0.342778	0.0686108	0.11682	0.655839	0.764705
CL13287.Contig1_DB	1	turquoise	0.870141	0.726721	0.00228322	0.0265624	0.537254	0.615042	0.135793	0.0779333	0.925054	0.704903	0.000352428	0.0339455	-0.115454	0.786574	0.767395	0.0119171	0.906841	-0.121435	0.00074099	0.755634	0.572741	0.793103	0.106993	0.0107629	-0.38413	0.784596	0.307405	0.0122826	0.7072	0.520516	0.033112	0.150807	-0.551916	0.591891	0.123397	0.0931394	0.570624	-0.38473	0.108596	0.306586	-0.172734	0.0283194	0.656741	0.942347	-0.386263	0.0671164	0.304497
CL7350.Contig1_DB	1	turquoise	0.955907	0.540167	5.67643e-05	0.133274	0.520857	0.623434	0.150492	0.0728306	0.907356	-0.273068	0.000727139	0.477128	-0.307113	0.465505	0.421466	0.206669	0.919691	0.713047	0.000446477	0.031051	0.561401	0.0172538	0.115751	0.96486	-0.227524	0.508693	0.556024	0.161969	0.212656	0.62562	0.582776	0.0715366	-0.594075	-0.35562	0.0916332	0.347608	0.520961	0.649887	0.150396	0.0581314	-0.345531	0.784643	0.362415	0.0122739	-0.207839	0.68883	0.591541
CL25379.Contig2_DB	1	turquoise	0.777831	0.887076	0.0135894	0.00142434	0.613016	0.906047	0.079198	0.000762731	0.83862	0.191411	0.00472965	0.62177	0.101088	0.867276	0.79581	0.00245724	0.817847	0.46609	0.00707201	0.206022	0.62021	0.244675	0.0747659	0.525753	0.108427	0.82783	0.781266	0.00586629	0.72569	0.899538	0.026885	0.000957961	-0.650669	0.219786	0.0577283	0.56989	0.630305	0.224225	0.0688121	0.561921	-0.0198403	0.546149	0.959595	0.128189	0.107108	0.66156	0.783877
CL15526.Contig2_DB	1	turquoise	0.9898	-0.877257	3.49446e-07	0.00188813	0.482623	-0.807168	0.188215	0.00853709	0.989193	-0.490456	4.27549e-07	0.180093	-0.316221	-0.881393	0.407094	0.00168173	0.996175	-0.25122	1.13503e-08	0.514376	0.51825	-0.719563	0.15291	0.0288548	-0.252355	-0.910836	0.512414	0.000638172	0.455141	-0.724783	0.21831	0.0271708	-0.533292	-0.330565	0.139263	0.384925	0.495421	0.00916555	0.175049	0.981329	-0.375371	-0.420285	0.319495	0.260031	-0.236032	-0.382117	0.540927
CL21493.Contig1_DB	1	turquoise	0.788869	0.613147	0.0115024	0.0791158	0.494617	0.619649	0.17586	0.0751058	0.72781	0.210826	0.0262245	0.5861	-0.175998	0.568028	0.650585	0.110583	0.744475	0.330063	0.0214011	0.385691	0.507948	0.216995	0.162688	0.574922	0.0393347	0.575353	0.919971	0.105034	0.0457252	0.620648	0.907011	0.074501	-0.567891	0.314437	0.110688	0.409892	0.483378	0.202495	0.187423	0.601318	-0.219606	0.433234	0.570214	0.244073	0.0538036	0.461862	0.890656
CL1598.Contig3_DB	1	turquoise	0.746752	0.818012	0.0207914	0.0070508	0.673731	0.812932	0.0466261	0.00772303	0.818953	0.233869	0.00693082	0.544751	0.0969654	0.792612	0.804005	0.0108469	0.764728	0.466016	0.0163788	0.206105	0.702746	0.468203	0.0347403	0.203696	-0.679847	0.83136	0.0439323	0.00547601	0.703979	0.758017	0.0342842	0.0179447	-0.648809	0.127389	0.0586901	0.743969	0.696398	0.273408	0.0371495	0.476557	0.0912487	0.613736	0.815395	0.0787468	-0.668944	0.545935	0.0488073
CL9635.Contig1_DB	1	turquoise	0.700904	-0.79124	0.0354287	0.0110843	0.163576	-0.779444	0.674107	0.0132698	0.6786	-0.189009	0.0444732	0.626233	-0.421126	-0.755361	0.258978	0.018591	0.711794	-0.48142	0.0314853	0.18948	0.220358	-0.370474	0.568861	0.326356	-0.0914538	-0.781575	0.814985	0.0128552	0.329531	-0.754059	0.386504	0.0189134	-0.229625	-0.101583	0.552282	0.794829	0.199073	-0.282793	0.607607	0.460924	-0.479482	-0.60253	0.191528	0.0859441	-0.104715	-0.564471	0.788616
CL25152.Contig1_DB	1	turquoise	0.894397	0.904418	0.00113487	0.00080869	0.381454	0.829977	0.311074	0.00562665	0.924681	0.595339	0.000358487	0.0907686	-0.27498	0.934736	0.473923	0.000219288	0.936521	0.152804	0.000199356	0.694703	0.406366	0.709084	0.277782	0.0324385	-0.00469361	0.93261	0.990438	0.000244803	0.593548	0.754583	0.091995	0.0187831	-0.431771	0.509555	0.245849	0.161139	0.401596	-0.148929	0.284007	0.702156	-0.378734	0.307471	0.314825	0.420897	0.00276396	0.341449	0.994369
CL1224.Contig3_DB	1	turquoise	0.697813	0.612081	0.0366033	0.0797852	0.611246	0.529298	0.0803128	0.142814	0.7557	0.609582	0.0185076	0.0813698	0.0852652	0.642704	0.827348	0.0619176	0.712099	-0.00201207	0.0313793	0.995901	0.616988	0.683936	0.0767313	0.0421879	-0.466814	0.689013	0.205224	0.0400853	0.507877	0.4476	0.162756	0.227003	-0.601652	0.558759	0.0865245	0.117851	0.608193	-0.190556	0.0822583	0.623358	0.0612366	0.170191	0.875639	0.661549	-0.441833	0.0963878	0.233774
CL12566.Contig1_DB	1	turquoise	0.91074	-0.682721	0.000640509	0.0427017	0.625747	-0.625822	0.0714617	0.0714178	0.94626	-0.339022	0.000112375	0.372127	-0.101013	-0.662668	0.79596	0.0517639	0.92064	-0.278481	0.000428705	0.468079	0.663306	-0.597266	0.0514584	0.0894597	-0.520313	-0.708796	0.150995	0.0325406	0.613903	-0.566658	0.0786425	0.11164	-0.63935	-0.185449	0.0637373	0.632866	0.647915	-0.0730312	0.0591559	0.851882	-0.130477	-0.426209	0.737936	0.252663	-0.509435	-0.346357	0.161255
CL21259.Contig3_DB	1	turquoise	0.950743	0.6579	8.32144e-05	0.0540843	0.521857	0.76171	0.14957	0.0170713	0.958268	-0.347613	4.69275e-05	0.359335	-0.245599	0.574184	0.524142	0.105908	0.954915	0.876582	6.12993e-05	0.0019234	0.554723	-0.0864076	0.121104	0.825063	-0.308358	0.600857	0.419488	0.0870518	0.462178	0.790089	0.210368	0.0112859	-0.565804	-0.404525	0.112301	0.280176	0.528973	0.767003	0.143106	0.0158694	-0.299274	0.930458	0.434015	0.000272683	-0.286424	0.863871	0.454935
CL14124.Contig1_DB	1	turquoise	-0.91757	0.722306	0.000488103	0.0279618	-0.434513	0.699376	0.242526	0.0360061	-0.857256	0.361166	0.00313781	0.339595	0.342104	0.728047	0.367513	0.0261513	-0.887169	0.225298	0.00142037	0.559999	-0.468377	0.231033	0.203506	0.549778	-0.0301333	0.691411	0.938659	0.0391162	-0.148073	0.704542	0.703806	0.0340776	0.527909	0.464171	0.144061	0.208148	-0.434364	0.00601662	0.242706	0.987743	0.409404	0.299289	0.273855	0.433991	-0.0419606	0.411753	0.914644
CL15913.Contig2_DB	1	turquoise	0.955384	0.887055	5.91248e-05	0.00142526	0.376909	0.856093	0.317356	0.00322438	0.896588	0.436047	0.00105691	0.240678	-0.458023	0.903823	0.215038	0.000825977	0.928411	0.253564	0.000301219	0.510326	0.429082	0.390757	0.249131	0.298416	-0.201142	0.868261	0.603802	0.0023964	0.186613	0.83178	0.630696	0.00543077	-0.458174	0.473561	0.214868	0.197864	0.391246	-0.0102347	0.297757	0.979152	-0.497769	0.35658	0.172693	0.346215	-0.194631	0.468268	0.615806
CL8363.Contig2_DB	1	turquoise	0.750861	0.819477	0.019721	0.00686459	0.486539	0.707883	0.184129	0.0328667	0.825794	0.787883	0.00609981	0.0116795	-0.036057	0.874888	0.926625	0.00201392	0.797386	-0.0830324	0.0100481	0.831817	0.498897	0.783417	0.171568	0.012504	-0.214015	0.868017	0.580312	0.00241136	0.720863	0.622136	0.0284293	0.0736058	-0.486608	0.751759	0.184057	0.019492	0.502635	-0.376132	0.167867	0.318436	-0.108457	0.0787135	0.781208	0.840472	-0.199905	0.132542	0.606077
CL1581.Contig9_DB	1	turquoise	-0.406604	0.918533	0.277473	0.000468877	-0.531001	0.88612	0.141294	0.00146559	-0.344531	0.412522	0.363899	0.269855	-0.0975822	0.928473	0.802778	0.000300325	-0.324072	0.31405	0.39489	0.4105	-0.575299	0.476328	0.105075	0.194889	0.31641	0.899748	0.406798	0.00095118	-0.0263892	0.839696	0.946271	0.00462528	0.571555	0.370159	0.10789	0.326799	-0.537611	0.0234917	0.135482	0.952165	-0.130563	0.42363	0.737768	0.255857	0.319841	0.506675	0.401446
CL8948.Contig1_DB	1	turquoise	0.830274	0.945864	0.00559406	0.000115256	0.30018	0.945175	0.432555	0.000120391	0.82333	0.267826	0.00639081	0.485961	-0.396362	0.914374	0.290919	0.000555825	0.835193	0.495009	0.00507268	0.175465	0.327018	0.401876	0.390354	0.283639	-0.354759	0.896614	0.34886	0.00105601	0.292948	0.917976	0.44426	0.000479932	-0.326653	0.24892	0.390914	0.518363	0.304145	0.219794	0.426197	0.569875	-0.415846	0.608938	0.265625	0.0817808	-0.325969	0.674906	0.391966
Unigene1160_DB	1	turquoise	0.942917	-0.501978	0.000138347	0.168514	0.724744	-0.556018	0.0271833	0.120054	0.946626	0.0333872	0.000109755	0.932047	-0.0533923	-0.485495	0.891488	0.185213	0.921787	-0.339845	0.000407872	0.370892	0.759265	0.169383	0.0176462	0.66308	-0.421296	-0.417865	0.258766	0.263073	0.473701	-0.593941	0.197713	0.091725	-0.76062	-0.0967483	0.0173261	0.804437	0.732088	-0.232335	0.0249244	0.547467	-0.0843619	-0.326941	0.829155	0.390472	-0.403753	-0.492972	0.281183
CL17439.Contig2_DB	1	turquoise	-0.856275	0.860508	0.00321075	0.00290431	-0.709569	0.924831	0.0322667	0.000356035	-0.858293	-0.040839	0.00306202	0.916919	-0.0143048	0.801588	0.970863	0.00937861	-0.833519	0.684435	0.00524619	0.0419785	-0.738853	0.0366426	0.0229564	0.925436	0.284856	0.758741	0.457518	0.0177712	-0.414249	0.954702	0.267653	6.23049e-05	0.755454	0.0206592	0.0185681	0.957928	-0.712608	0.459233	0.0312026	0.213672	0.0314494	0.733569	0.935984	0.0244846	0.274182	0.848744	0.47526
CL6803.Contig2_DB	1	turquoise	0.825197	-0.818054	0.00616944	0.00704544	0.519396	-0.796931	0.151844	0.0101225	0.75136	-0.346576	0.0195934	0.360869	-0.242497	-0.784335	0.529561	0.0123315	0.761967	-0.395396	0.0170115	0.292204	0.569746	-0.493356	0.109266	0.177137	-0.284328	-0.808336	0.458388	0.00836759	0.0633891	-0.759994	0.871296	0.0174734	-0.593244	-0.336796	0.0922041	0.375475	0.526165	-0.164591	0.145636	0.672175	-0.248174	-0.545078	0.519659	0.129091	-0.28178	-0.525238	0.4626
CL17587.Contig1_DB	1	turquoise	0.960634	0.830599	3.8346e-05	0.00555857	0.518937	0.900305	0.152271	0.000933325	0.960743	-0.10607	3.79806e-05	0.785932	-0.251437	0.775333	0.514	0.0140945	0.96348	0.750579	2.95724e-05	0.0197931	0.556571	0.110827	0.119608	0.776523	-0.189416	0.777892	0.625476	0.0135772	0.512366	0.902851	0.158452	0.000854716	-0.570596	-0.154567	0.108618	0.691321	0.536144	0.563057	0.136759	0.114446	-0.316401	0.82878	0.406813	0.00575941	-0.17636	0.82775	0.649905
CL1133.Contig1_DB	1	turquoise	0.553699	0.848276	0.121937	0.00384912	0.114311	0.930184	0.769648	0.000276395	0.6456	-0.173331	0.0603729	0.655614	-0.207913	0.773313	0.591405	0.014512	0.646533	0.828403	0.0598807	0.00580167	0.127741	0.0127607	0.743281	0.974008	0.00914287	0.762332	0.981376	0.0169269	0.774465	0.961374	0.014273	3.59079e-05	-0.109837	-0.174438	0.778479	0.653525	0.151688	0.628647	0.696848	0.0697688	-0.305896	0.88843	0.423404	0.00136735	0.00716252	0.922708	0.985409
CL21495.Contig1_DB	1	turquoise	0.91765	0.697722	0.000486482	0.0366382	0.325277	0.775292	0.393031	0.0141029	0.912379	-0.166664	0.000601285	0.668236	-0.394016	0.644807	0.294044	0.0607934	0.938682	0.690801	0.000176975	0.0393611	0.362308	-0.141283	0.337958	0.716925	-0.00456166	0.602209	0.990707	0.0861558	0.445776	0.828723	0.229133	0.00576585	-0.394365	-0.100683	0.293579	0.796614	0.34466	0.501624	0.363708	0.168864	-0.485235	0.699448	0.185484	0.035979	0.00180782	0.794039	0.996317
Unigene5507_DB	1	turquoise	0.67539	0.91632	0.0458852	0.00051386	-0.220805	0.862748	0.568057	0.00275062	0.577876	0.454636	0.103163	0.218888	-0.871813	0.917234	0.00218567	0.000494934	0.659678	0.331148	0.0532115	0.384037	-0.174749	0.68031	0.652939	0.0437326	-0.0366332	0.947323	0.925455	0.000104898	-0.201776	0.787844	0.602637	0.0116865	0.137534	0.315545	0.724196	0.408153	-0.219068	0.0595546	0.571183	0.879034	-0.889762	0.500664	0.00131282	0.169812	-0.0144138	0.456706	0.970642
CL6094.Contig1_DB	1	turquoise	-0.727698	-0.898512	0.0262592	0.000991599	-0.829982	-0.937537	0.00562618	0.0001886	-0.733625	-0.164249	0.024468	0.672827	-0.196524	-0.852991	0.612306	0.00346325	-0.680403	-0.575368	0.0436925	0.105023	-0.866653	-0.168788	0.00249625	0.664208	0.628076	-0.818129	0.0701002	0.00703573	-0.391932	-0.951306	0.296836	7.99769e-05	0.84223	-0.280608	0.00438592	0.464544	-0.837094	-0.325039	0.0048804	0.393398	-0.21326	-0.659371	0.58168	0.0533616	0.620328	-0.764853	0.0746942
CL4310.Contig1_DB	1	turquoise	0.891731	0.936371	0.00123503	0.000200975	0.115796	0.918941	0.766722	0.000460899	0.858041	0.393244	0.00308028	0.295078	-0.628059	0.918446	0.0701096	0.000470593	0.907827	0.372775	0.00071462	0.323122	0.162935	0.393727	0.675327	0.294431	-0.0880541	0.885265	0.821773	0.00150317	0.271843	0.898517	0.479185	0.000991434	-0.186535	0.452852	0.630841	0.220929	0.138392	0.0924534	0.722532	0.812992	-0.690189	0.484156	0.0396082	0.186609	-0.0808322	0.594234	0.836224
Unigene37072_DB	1	turquoise	-0.749768	-0.732066	0.0200021	0.0249312	0.113697	-0.641705	0.770859	0.0624561	-0.679692	-0.516145	0.0439994	0.15488	0.791086	-0.741748	0.0111111	0.0221464	-0.751332	-0.104912	0.0196005	0.788225	0.0686826	-0.72634	0.86063	0.0266813	0.104327	-0.778263	0.789384	0.0135033	0.0460532	-0.562166	0.906347	0.115148	-0.0395766	-0.356441	0.91948	0.346416	0.101893	0.113262	0.794213	0.771717	0.819819	-0.269104	0.00682159	0.4838	0.0922777	-0.223845	0.813342
CL10986.Contig1_DB	1	turquoise	-0.559791	0.69696	0.117029	0.036932	0.138662	0.620364	0.722007	0.0746724	-0.525918	0.534488	0.14586	0.13821	0.552753	0.732753	0.122711	0.0247264	-0.595865	0.0691449	0.0904097	0.859699	0.122557	0.587935	0.753434	0.0959057	-0.4838	0.764583	0.186981	0.0164116	-0.120758	0.552337	0.756964	0.123051	-0.049904	0.450665	0.898547	0.223448	0.130183	-0.116865	0.738511	0.764617	0.66905	0.220476	0.0487583	0.568649	-0.486969	0.177367	0.183684
CL17742.Contig2_DB	1	turquoise	0.814615	0.33743	0.00749577	0.374521	0.189936	0.348527	0.624511	0.357988	0.73586	0.132824	0.0238139	0.733359	-0.578592	0.317863	0.102636	0.404528	0.777774	0.234357	0.0136009	0.543887	0.252081	0.0329489	0.512886	0.932938	-0.306424	0.31947	0.422562	0.402023	0.00531588	0.382893	0.989171	0.309099	-0.27063	0.278136	0.481227	0.468653	0.200065	0.120654	0.605781	0.757168	-0.588043	0.282196	0.0958297	0.461912	-0.29451	0.294403	0.441719
CL2372.Contig2_DB	1	turquoise	-0.400808	0.901017	0.285042	0.000910842	-0.288906	0.954529	0.450861	6.31316e-05	-0.410261	-0.0394653	0.272752	0.919706	-0.0222168	0.847773	0.954759	0.00389195	-0.411179	0.741997	0.271575	0.0220776	-0.299051	0.132878	0.434374	0.733255	-0.302785	0.835921	0.428373	0.00499842	-0.420365	0.970301	0.259931	1.4439e-05	0.32481	-0.066467	0.393751	0.865092	-0.30723	0.505351	0.421281	0.165208	0.0586396	0.816861	0.880882	0.00719946	-0.297366	0.852859	0.437093
CL11818.Contig1_DB	1	turquoise	0.880286	0.899646	0.00173534	0.000954464	0.165797	0.811922	0.669883	0.0078617	0.809399	0.665876	0.00821548	0.0502389	-0.636191	0.935029	0.0654821	0.000215925	0.855181	0.0713577	0.0032934	0.855247	0.214445	0.705636	0.579532	0.0336779	-0.269773	0.918071	0.482671	0.000478043	0.020943	0.732264	0.957351	0.0248718	-0.235944	0.605705	0.541082	0.0838655	0.172097	-0.22771	0.657946	0.555693	-0.64903	0.218562	0.0585751	0.572094	-0.251701	0.289422	0.513544
CL19274.Contig2_DB	1	turquoise	0.755249	0.812213	0.0186185	0.00782154	0.804823	0.86006	0.00888418	0.00293577	0.833084	0.0353275	0.00529199	0.928106	0.26772	0.742045	0.48614	0.0220644	0.773907	0.645816	0.0143885	0.060259	0.822152	0.211649	0.00653317	0.584605	-0.390191	0.744186	0.299178	0.0214793	0.762067	0.8631	0.0169882	0.00272702	-0.801156	0.0658891	0.00944601	0.866256	0.824029	0.443441	0.00630735	0.231875	0.215215	0.746565	0.57814	0.0208411	-0.389488	0.768863	0.300126
CL20326.Contig3_DB	1	turquoise	0.968434	-0.780509	1.7841e-05	0.0130614	0.482828	-0.696225	0.188	0.0372166	0.963376	-0.634277	2.98653e-05	0.0665534	-0.320875	-0.827608	0.399839	0.00589144	0.966651	0.0506707	2.1585e-05	0.896995	0.523035	-0.543213	0.148488	0.13067	-0.389215	-0.775202	0.300496	0.0141213	0.407557	-0.645377	0.27624	0.0604909	-0.523835	-0.64925	0.147756	0.0584613	0.497729	0.321937	0.172733	0.398191	-0.354514	-0.048433	0.349216	0.901526	-0.375113	-0.204932	0.319855
Unigene43404_DB	1	turquoise	0.947791	0.723701	0.000101718	0.0275145	0.441526	0.740073	0.234139	0.0226127	0.958332	0.157587	4.66786e-05	0.685536	-0.32738	0.679973	0.389798	0.0438777	0.959916	0.379732	4.08197e-05	0.313447	0.481517	0.14239	0.189378	0.714782	-0.346051	0.621847	0.361645	0.0737794	0.518982	0.751821	0.152228	0.0194761	-0.474982	0.253665	0.196333	0.510152	0.46088	0.171676	0.211821	0.65874	-0.371853	0.42685	0.324416	0.251873	-0.328839	0.591856	0.387563
Unigene35671_DB	1	turquoise	0.624582	0.732114	0.0721492	0.0249168	0.287866	0.773812	0.452566	0.0144082	0.637281	0.152662	0.0648768	0.694976	-0.133093	0.705545	0.732835	0.0337109	0.651813	0.457868	0.0571419	0.215214	0.281348	0.0412128	0.463317	0.916161	0.381284	0.669569	0.311308	0.048519	0.330892	0.797286	0.384426	0.0100644	-0.35034	0.317434	0.355321	0.405198	0.278815	0.268628	0.467524	0.484604	-0.255303	0.518378	0.507328	0.152791	0.396031	0.620622	0.291359
CL22304.Contig2_DB	1	turquoise	0.70737	0.89915	0.0330507	0.000970578	0.511216	0.905344	0.159548	0.000782343	0.68198	0.211977	0.0430168	0.584009	-0.168348	0.875632	0.665042	0.00197381	0.660488	0.484484	0.0528166	0.186267	0.566734	0.283467	0.111581	0.459809	-0.774303	0.836619	0.0143064	0.00492795	0.204091	0.895807	0.598393	0.00108428	-0.526976	0.210269	0.144903	0.587113	0.52137	0.209638	0.150018	0.588263	-0.118311	0.562546	0.761772	0.114849	-0.757835	0.667663	0.0179886
CL11099.Contig2_DB	1	turquoise	0.773731	0.86425	0.014425	0.00265075	0.600314	0.844863	0.0874132	0.00414618	0.805968	0.247394	0.00871355	0.521015	0.0165377	0.866719	0.966317	0.00249212	0.788479	0.43153	0.0115723	0.246142	0.631624	0.374608	0.0680566	0.320558	-0.264486	0.861354	0.491622	0.00284562	0.576585	0.817764	0.104118	0.00708259	-0.629635	0.142657	0.0691975	0.714265	0.630398	0.173164	0.0687583	0.65593	-0.0396272	0.529492	0.919378	0.14264	-0.276904	0.548511	0.470708
CL10794.Contig1_DB	1	turquoise	-0.597902	0.419203	0.0890303	0.261389	-0.324941	0.535621	0.393548	0.137217	-0.60721	-0.474908	0.0828912	0.196413	0.109658	0.329228	0.778833	0.386967	-0.608537	0.790094	0.0820378	0.011285	-0.311548	-0.259579	0.41444	0.49999	-0.156477	0.353035	0.68766	0.351374	-0.226954	0.577194	0.557041	0.103667	0.367715	-0.510306	0.330253	0.160419	-0.297635	0.773738	0.436658	0.0144236	0.191877	0.804626	0.620907	0.00891374	-0.194252	0.742166	0.616507
CL14749.Contig1_DB	1	turquoise	0.58211	0.854156	0.100069	0.00337212	0.287282	0.783549	0.453525	0.0124792	0.601796	0.475027	0.086429	0.196285	-0.15178	0.881453	0.696671	0.00167882	0.603922	0.188392	0.0850287	0.627382	0.318966	0.682093	0.402807	0.0429685	-0.0516297	0.898757	0.895054	0.000983507	0.534841	0.698915	0.1379	0.0361815	-0.309281	0.289922	0.418024	0.449198	0.32109	-0.0564861	0.399505	0.885233	-0.206069	0.33963	0.594773	0.371214	-0.0562386	0.324941	0.885733
Unigene27727_DB	1	turquoise	0.470592	0.730432	0.201085	0.0254227	0.571334	0.588307	0.108057	0.0956435	0.452988	0.823232	0.220773	0.00640261	0.101247	0.814609	0.795495	0.00749653	0.414452	-0.204922	0.267395	0.59687	0.615392	0.863282	0.0777161	0.0027148	-0.653071	0.826316	0.0565012	0.00603934	0.231312	0.48404	0.549282	0.18673	-0.569346	0.684034	0.109572	0.0421468	0.586144	-0.4778	0.0971745	0.193317	0.159663	-0.040627	0.681568	0.917349	-0.647505	-0.0383897	0.0593705
CL9698.Contig2_DB	1	turquoise	0.637492	0.206417	0.0647601	0.594136	0.005612	0.121523	0.988568	0.755462	0.545028	0.373707	0.129133	0.321818	-0.64197	0.221107	0.0623133	0.567514	0.596398	-0.105165	0.0900476	0.787724	0.0666714	0.601701	0.86468	0.0864917	-0.29251	0.311665	0.444973	0.414254	-0.0844385	0.0303409	0.829002	0.938237	-0.0643987	0.187425	0.869261	0.629182	0.0250466	-0.141097	0.949002	0.717285	-0.616482	0.0405324	0.0770427	0.917541	-0.285534	-0.14389	0.4564
CL25500.Contig2_DB	1	turquoise	0.708273	0.805282	0.0327271	0.00881555	0.472475	0.901871	0.199038	0.000884389	0.728232	-0.195131	0.0260945	0.61488	-0.0852155	0.736672	0.827448	0.0235792	0.716888	0.811335	0.0297437	0.00794314	0.494283	-0.0797285	0.176198	0.838436	-0.367316	0.713905	0.330819	0.0307556	0.366046	0.940012	0.332622	0.000164123	-0.487794	-0.147153	0.182831	0.705579	0.49015	0.629366	0.180407	0.0693527	-0.107239	0.854344	0.783618	0.00335762	-0.371893	0.910979	0.32436
CL16938.Contig1_DB	1	turquoise	0.62492	0.80916	0.0719493	0.00824947	-0.0940665	0.833572	0.809777	0.00524061	0.598437	0.20585	0.0886702	0.595174	-0.616745	0.786578	0.0768805	0.0119165	0.645845	0.415771	0.0602434	0.26572	-0.070716	0.0959269	0.856537	0.806072	0.0495508	0.728432	0.899262	0.0260329	0.125469	0.852218	0.747727	0.00352458	0.0395398	0.346523	0.919555	0.360946	-0.099107	0.193483	0.799746	0.61793	-0.67529	0.469684	0.0459298	0.202074	0.084301	0.628792	0.829277
CL13390.Contig1_DB	1	turquoise	0.965123	0.827601	2.52124e-05	0.00589223	0.474786	0.735434	0.196544	0.0239376	0.964281	0.705195	2.73834e-05	0.0338388	-0.288734	0.859229	0.451143	0.00299464	0.975397	-0.00376512	7.50896e-06	0.99233	0.506384	0.684363	0.164202	0.0420086	-0.149387	0.845506	0.701274	0.0040891	0.463377	0.672783	0.20903	0.0470531	-0.528445	0.720407	0.14358	0.0285781	0.491703	-0.28226	0.178819	0.461806	-0.35806	0.147915	0.344071	0.70411	-0.140528	0.227157	0.718388
CL7682.Contig1_DB	1	turquoise	0.873156	0.713288	0.00210944	0.0309679	0.142965	0.687833	0.713668	0.0405678	0.805294	0.285227	0.00881378	0.456906	-0.624659	0.722733	0.0721034	0.0278242	0.860974	0.307904	0.00287187	0.420208	0.196311	0.285009	0.6127	0.457264	-0.0768019	0.712218	0.844307	0.031338	0.100864	0.680066	0.796255	0.0438376	-0.23328	0.268421	0.545793	0.484954	0.159712	0.0791704	0.681474	0.839555	-0.6745	0.388172	0.0462819	0.301906	-0.0718747	0.421341	0.854207
CL22818.Contig1_DB	1	turquoise	0.728724	0.953142	0.0259433	7.00346e-05	0.0918256	0.969633	0.814244	1.55983e-05	0.646585	0.227548	0.0598534	0.555982	-0.57048	0.922357	0.108707	0.000397784	0.701473	0.547423	0.035215	0.12712	0.118111	0.269248	0.762166	0.483557	-0.0244336	0.898266	0.950249	0.000999787	-0.147441	0.969415	0.705024	1.59894e-05	-0.172961	0.278115	0.656312	0.468689	0.0800511	0.279665	0.83779	0.46611	-0.599694	0.647918	0.0878272	0.0591545	0.000213412	0.727816	0.999565
CL27138.Contig1_DB	1	turquoise	-0.424194	0.52262	0.255156	0.148869	-0.970444	0.504147	1.41986e-05	0.166384	-0.508259	0.057642	0.162388	0.882897	-0.707902	0.498357	0.0328599	0.172105	-0.413906	0.369894	0.268089	0.327172	-0.964963	0.391249	2.5616e-05	0.297754	0.32914	0.53949	0.387102	0.133857	-0.684783	0.47657	0.0418324	0.194629	0.941292	-0.138894	0.000152376	0.721557	-0.977608	0.204448	5.4124e-06	0.597739	-0.682163	0.464162	0.0429389	0.208158	0.331571	0.378777	0.383392
CL12339.Contig2_DB	1	turquoise	0.916176	0.574772	0.000516872	0.105468	0.315728	0.470851	0.407867	0.200802	0.849165	0.558376	0.0037742	0.118158	-0.487615	0.602854	0.183015	0.0857301	0.885382	-0.0414205	0.00149797	0.915739	0.351189	0.791093	0.354074	0.0111098	-0.0985614	0.65038	0.800831	0.0578773	0.0795179	0.376367	0.838859	0.318108	-0.39487	0.378769	0.292904	0.314777	0.312536	-0.240524	0.412882	0.533019	-0.52713	0.123637	0.144764	0.751314	-0.0751065	0.0476249	0.847712
CL22052.Contig6_DB	1	turquoise	0.753094	0.856307	0.0191547	0.00320832	0.613427	0.821455	0.0789401	0.00661848	0.787481	0.472264	0.011752	0.199267	0.0809845	0.868435	0.835919	0.0023858	0.771879	0.24441	0.0148134	0.526216	0.621253	0.412212	0.0741359	0.270252	-0.0308395	0.842793	0.937224	0.00433386	0.539369	0.802588	0.133961	0.00922386	-0.646789	0.543863	0.059746	0.130118	0.629657	-0.0279979	0.069185	0.943	0.000112701	0.357746	0.99977	0.344525	-0.0367062	0.448489	0.925307
CL27037.Contig1_DB	1	turquoise	-0.782774	0.754832	0.0126259	0.0187214	-0.40333	0.734139	0.281735	0.0243164	-0.772956	0.332274	0.0145866	0.382322	0.231497	0.764611	0.548954	0.0164052	-0.777049	0.2111	0.0137462	0.585602	-0.430903	0.236973	0.246905	0.539267	0.0481607	0.698109	0.902077	0.0364898	-0.397511	0.726113	0.289394	0.0267522	0.452753	0.389973	0.221043	0.299473	-0.407101	-0.0285023	0.276829	0.941975	0.293014	0.260559	0.444152	0.498314	0.0233479	0.434494	0.952458
CL4507.Contig1_DB	1	turquoise	0.843094	0.664275	0.00430622	0.0509963	0.453944	0.599678	0.219678	0.0878377	0.815895	0.407008	0.0073259	0.27695	-0.217482	0.664619	0.574043	0.0508326	0.831872	0.215006	0.00542087	0.578517	0.474885	0.638174	0.196437	0.0643834	0.13449	0.729823	0.730116	0.0256074	0.304727	0.534976	0.425268	0.137782	-0.533678	0.26283	0.138923	0.49444	0.4499	0.0280424	0.224332	0.94291	-0.308053	0.384279	0.419972	0.307202	0.154848	0.264398	0.690781
CL17109.Contig2_DB	1	turquoise	0.868689	0.871413	0.00237031	0.00220873	0.538066	0.763268	0.135088	0.0167114	0.896415	0.671325	0.00106294	0.0477145	-0.179168	0.91225	0.644626	0.000604299	0.875127	0.055603	0.00200097	0.887018	0.586831	0.83962	0.0966861	0.00463262	-0.606589	0.932894	0.083292	0.000241284	0.573141	0.661867	0.106692	0.0521492	-0.546595	0.499545	0.127814	0.170923	0.568291	-0.227598	0.110381	0.555893	-0.188564	0.231824	0.627061	0.548375	-0.601981	0.215238	0.0863068
CL18633.Contig2_DB	1	turquoise	0.917089	0.970951	0.000497907	1.33708e-05	0.601014	0.928157	0.0869473	0.000304898	0.941479	0.479665	0.000150715	0.191334	-0.134038	0.976809	0.730995	6.11383e-06	0.924926	0.313922	0.000354507	0.4107	0.644023	0.573364	0.0612111	0.106524	-0.457081	0.96993	0.216105	1.50735e-05	0.59047	0.869461	0.0941272	0.00232371	-0.625784	0.429303	0.0714404	0.248861	0.629883	0.0301074	0.0690549	0.938712	-0.169324	0.458937	0.663191	0.214006	-0.455883	0.503788	0.217465
CL11760.Contig2_DB	1	turquoise	0.836589	0.560481	0.00493091	0.11648	0.741503	0.565591	0.0222144	0.112467	0.883298	0.0210353	0.00159213	0.957163	0.102951	0.50202	0.792113	0.168473	0.83881	0.480561	0.00471109	0.190387	0.757074	0.248804	0.0181724	0.518565	-0.359186	0.543288	0.342446	0.130606	0.62936	0.567012	0.0693563	0.111366	-0.748288	-0.0521132	0.020387	0.894076	0.746878	0.343513	0.020758	0.365413	0.0598845	0.5779	0.878368	0.103146	-0.338292	0.506628	0.373223
Unigene23177_DB	1	turquoise	0.804548	-0.646097	0.0089255	0.0601105	0.49946	-0.66144	0.171007	0.0523554	0.876678	-0.131875	0.00191833	0.73521	-0.10253	-0.651568	0.792949	0.0572672	0.846136	-0.308298	0.00403365	0.419584	0.529545	-0.135119	0.142593	0.728892	-0.485021	-0.618594	0.185706	0.0757476	0.754721	-0.646641	0.0187489	0.0598239	-0.488973	-0.124799	0.181615	0.749038	0.526214	-0.159237	0.145592	0.682381	-0.142534	-0.356929	0.714502	0.345708	-0.470691	-0.442848	0.200976
CL18907.Contig3_DB	1	turquoise	0.804929	0.931144	0.00886826	0.000263567	0.459214	0.979264	0.213694	4.1428e-06	0.859076	0.0357201	0.00300558	0.927309	-0.0774348	0.878088	0.843037	0.00184532	0.855057	0.703938	0.00330285	0.0342996	0.460945	0.195019	0.211748	0.615088	0.159736	0.865066	0.681428	0.0025976	0.674805	0.979868	0.0461457	3.73779e-06	-0.494681	0.0263978	0.175796	0.946254	0.472017	0.463606	0.199535	0.208776	-0.198546	0.793586	0.608578	0.0106806	0.170038	0.837339	0.661839
CL1485.Contig6_DB	1	turquoise	-0.716167	0.738678	0.0299863	0.0230058	-0.410284	0.834917	0.272724	0.00510102	-0.731753	-0.279114	0.0250248	0.467025	0.157472	0.664873	0.685756	0.0507125	-0.720874	0.850223	0.0284258	0.00368637	-0.43029	-0.0868683	0.247654	0.824142	0.153122	0.669427	0.694094	0.0485842	-0.45308	0.870642	0.220667	0.00225365	0.437659	-0.30097	0.238743	0.431286	-0.408818	0.705029	0.27461	0.0338992	0.209808	0.897748	0.587952	0.00101721	0.119775	0.886095	0.758895
Unigene30160_DB	1	turquoise	0.532555	0.622207	0.139915	0.0735636	0.12387	0.693896	0.750859	0.0381278	0.537962	-0.199874	0.135178	0.606133	-0.254027	0.567945	0.509526	0.110647	0.565446	0.717798	0.11258	0.0294394	0.146452	-3.63985e-05	0.706932	0.999926	0.220391	0.578435	0.568802	0.102752	0.412718	0.703974	0.269605	0.0342864	-0.165547	-0.269064	0.670357	0.483867	0.157242	0.567379	0.686197	0.111083	-0.335392	0.762729	0.377595	0.0168353	0.205331	0.720379	0.596123
CL1069.Contig2_DB	1	turquoise	0.768237	0.920404	0.0155976	0.000433072	0.0800954	0.953958	0.837701	6.59143e-05	0.724667	0.14124	0.0272077	0.717009	-0.588052	0.872064	0.0958227	0.00217128	0.770466	0.622466	0.0151143	0.0734083	0.126272	0.274688	0.746154	0.474412	-0.109924	0.873345	0.778308	0.00209889	0.178244	0.94677	0.646361	0.00010874	-0.148787	0.16425	0.70243	0.672825	0.0923181	0.393123	0.813262	0.295239	-0.63455	0.739395	0.0664003	0.0228032	-0.0915126	0.763354	0.814868
CL11458.Contig3_DB	1	turquoise	0.747547	0.709246	0.0205814	0.032381	0.23265	0.80652	0.54691	0.00863203	0.751751	-0.225295	0.0194939	0.560005	-0.334248	0.640458	0.379326	0.0631329	0.777412	0.754974	0.0136732	0.0186863	0.269007	-0.20761	0.483964	0.591959	0.097598	0.596634	0.802746	0.0898873	0.475898	0.866623	0.19535	0.00249816	-0.296105	-0.125402	0.439133	0.747857	0.258077	0.58827	0.502563	0.0956692	-0.431741	0.762042	0.245885	0.0169942	0.0974525	0.864255	0.803036
CL7106.Contig2_DB	1	turquoise	0.81924	0.911053	0.00689442	0.000632904	0.268163	0.827898	0.48539	0.00585859	0.746226	0.575801	0.0209314	0.104701	-0.504001	0.945584	0.166527	0.000117321	0.778165	0.141013	0.0135229	0.717449	0.332332	0.697741	0.382234	0.0366311	-0.372787	0.943385	0.323107	0.000134478	0.0995039	0.74755	0.798957	0.0205807	-0.330846	0.440249	0.384497	0.235653	0.290662	-0.141821	0.447987	0.715884	-0.496138	0.289257	0.174328	0.450286	-0.36894	0.322179	0.32852
CL202.Contig2_DB	1	turquoise	0.856378	0.874658	0.00320301	0.00202643	0.264429	0.77169	0.491719	0.0148535	0.863679	0.698709	0.00268846	0.0362603	-0.448348	0.925123	0.226132	0.000351332	0.877103	0.0403849	0.00189614	0.91784	0.318975	0.777851	0.402793	0.0135853	-0.427328	0.94019	0.251284	0.000162447	0.482182	0.682241	0.188678	0.0429054	-0.291758	0.585789	0.446198	0.0974268	0.299785	-0.239542	0.433191	0.534744	-0.474738	0.212528	0.196596	0.583008	-0.424333	0.209393	0.254984
CL19915.Contig2_DB	1	turquoise	0.817809	0.510266	0.00707684	0.160457	0.224089	0.526783	0.562164	0.145077	0.82459	0.117862	0.00624087	0.762657	-0.373978	0.503838	0.321439	0.166686	0.858642	0.329241	0.00303678	0.386948	0.24606	0.0486948	0.523338	0.900996	0.209431	0.488883	0.58864	0.181707	0.463791	0.532234	0.20857	0.140199	-0.291023	0.170719	0.447399	0.660551	0.243341	0.187663	0.528084	0.62874	-0.489228	0.370388	0.181353	0.326477	0.213104	0.400999	0.581964
CL29037.Contig2_DB	1	turquoise	0.755578	-0.954869	0.0185375	6.1515e-05	0.541516	-0.932164	0.132117	0.000250412	0.822685	-0.362782	0.00646849	0.337279	0.0611538	-0.940504	0.875806	0.00015953	0.807609	-0.426834	0.00847281	0.251893	0.543807	-0.448938	0.130165	0.225446	0.154915	-0.928856	0.690653	0.000294848	0.743629	-0.909468	0.0216306	0.00067219	-0.573664	-0.353185	0.106299	0.351155	0.560691	-0.13422	0.116313	0.73064	-0.0644215	-0.551407	0.869215	0.123815	0.154365	-0.606558	0.691708
CL7604.Contig1_DB	1	turquoise	0.88744	0.817059	0.00140889	0.00717375	0.440272	0.767123	0.235626	0.0158429	0.865305	0.519081	0.00258215	0.152137	-0.267708	0.852894	0.48616	0.00347091	0.885192	0.102557	0.00150642	0.792895	0.472513	0.437207	0.198998	0.239284	0.0433375	0.812829	0.911852	0.00773709	0.372835	0.72741	0.323039	0.0263482	-0.517367	0.55183	0.153735	0.123467	0.451407	-0.143784	0.222591	0.712085	-0.353899	0.204038	0.350112	0.598488	0.0521211	0.327512	0.89406
CL20808.Contig2_DB	1	turquoise	0.842815	0.908144	0.00433183	0.000706285	0.694253	0.944256	0.0379873	0.000127485	0.888027	0.0241448	0.00138415	0.950837	0.0173657	0.860732	0.964632	0.00288866	0.84649	0.708226	0.00400274	0.0327441	0.733286	0.263423	0.0245681	0.493429	-0.635799	0.877073	0.0657004	0.0018977	0.641524	0.932465	0.0625543	0.000246611	-0.692409	-0.0654858	0.0387172	0.867069	0.719454	0.485352	0.0288908	0.185362	0.00704285	0.816325	0.985653	0.00726943	-0.629412	0.789105	0.0693263
CL3328.Contig2_DB	1	turquoise	0.975257	0.608219	7.65805e-06	0.0822414	0.433359	0.589685	0.243922	0.0946754	0.937253	0.246016	0.000191565	0.523415	-0.412439	0.580781	0.269961	0.101035	0.955105	0.308361	6.04104e-05	0.419483	0.485486	0.441933	0.185223	0.233656	-0.347895	0.596163	0.35892	0.0902076	0.285022	0.553047	0.457243	0.122469	-0.497336	0.192835	0.173126	0.619131	0.447564	0.099094	0.227045	0.799772	-0.442839	0.418336	0.232585	0.262479	-0.334405	0.401824	0.379089
CL27802.Contig1_DB	1	turquoise	-0.760493	0.707532	0.0173558	0.0329927	-0.225056	0.704279	0.560433	0.0341742	-0.778027	0.273794	0.0135503	0.475911	0.319671	0.66852	0.40171	0.0490035	-0.801098	0.387932	0.00945504	0.302232	-0.230604	0.286498	0.550541	0.454813	-0.176968	0.677704	0.64876	0.0448647	-0.415283	0.704858	0.266339	0.0339619	0.271631	0.365006	0.479543	0.334102	-0.231769	0.191567	0.548472	0.621482	0.420574	0.501893	0.259669	0.168598	-0.19028	0.515426	0.62387
CL21723.Contig1_DB	1	turquoise	0.951303	0.404035	7.9991e-05	0.280815	0.486274	0.269001	0.184404	0.483975	0.92355	0.614419	0.000377255	0.0783211	-0.294323	0.467154	0.442024	0.20485	0.939198	-0.275962	0.00017191	0.472281	0.52301	0.756515	0.148511	0.0183084	-0.102522	0.485961	0.792965	0.184729	0.349241	0.180913	0.356935	0.641351	-0.553909	0.426433	0.121766	0.252387	0.500641	-0.475394	0.169835	0.19589	-0.355921	-0.156559	0.347171	0.687503	-0.0968446	-0.176069	0.804245
CL22954.Contig1_DB	1	turquoise	0.823515	0.598475	0.00636862	0.0886443	0.522326	0.518118	0.149138	0.153033	0.782732	0.562274	0.012634	0.115062	-0.171316	0.665241	0.659421	0.0505381	0.794263	-0.0448829	0.0105661	0.908719	0.561501	0.643419	0.115672	0.061534	-0.0956205	0.680039	0.806682	0.0438492	0.284672	0.432537	0.45782	0.244919	-0.591032	0.445403	0.0937355	0.229569	0.539716	-0.267106	0.133662	0.487178	-0.218088	0.0846277	0.572949	0.828623	-0.0980296	0.0589546	0.801888
Unigene34592_DB	1	turquoise	0.799899	0.513079	0.00964391	0.157774	-0.0189172	0.508271	0.961474	0.162375	0.760258	0.261478	0.0174113	0.496746	-0.69712	0.529099	0.0368703	0.142993	0.816341	0.0669783	0.00726737	0.864062	0.0174876	0.107925	0.964384	0.782259	-0.0685725	0.447137	0.860852	0.227542	0.136884	0.497518	0.725459	0.172944	-0.0420951	0.360279	0.914371	0.340872	-0.00670696	-0.0967949	0.986337	0.804344	-0.744654	0.076986	0.0213527	0.843938	-0.0529647	0.279275	0.892353
CL19192.Contig2_DB	1	turquoise	0.745581	0.826775	0.0211036	0.00598649	0.0927241	0.910332	0.812452	0.00065056	0.693945	-0.107902	0.0381086	0.782306	-0.594642	0.750832	0.0912445	0.0197284	0.728216	0.765484	0.0260992	0.0162082	0.133924	0.0162834	0.731217	0.966835	-0.304531	0.725675	0.42558	0.0268898	0.0811223	0.942207	0.835643	0.000144354	-0.134261	-0.0346347	0.730562	0.929513	0.0962052	0.556583	0.805518	0.119599	-0.592266	0.824296	0.0928797	0.00627557	-0.274145	0.896874	0.475322
CL16689.Contig1_DB	1	turquoise	0.907161	0.948119	0.000732357	9.95273e-05	0.400596	0.917788	0.28532	0.000483709	0.913103	0.411685	0.000584496	0.270926	-0.306005	0.950622	0.42323	8.39191e-05	0.928515	0.36928	0.000299716	0.32804	0.437981	0.490202	0.238358	0.180353	-0.0933295	0.943551	0.811245	0.000133122	0.523251	0.870974	0.14829	0.00223428	-0.455799	0.368018	0.217562	0.329824	0.426131	0.09313	0.25276	0.811643	-0.386051	0.500486	0.304786	0.169989	-0.0900133	0.537802	0.81786
CL1001.Contig1_DB	1	turquoise	0.985616	0.441067	1.15875e-06	0.234683	0.412863	0.34121	0.26942	0.368848	0.961299	0.553724	3.61515e-05	0.121917	-0.411785	0.480449	0.270798	0.190505	0.979964	-0.151703	3.67601e-06	0.696819	0.454341	0.709455	0.219224	0.0323069	-0.254206	0.537531	0.509219	0.135552	0.331167	0.242931	0.384008	0.528803	-0.47323	0.407983	0.198222	0.275689	0.424465	-0.264334	0.254821	0.49188	-0.459287	0.00963592	0.213611	0.980371	-0.23862	-0.0836118	0.536367
CL2664.Contig1_DB	1	turquoise	0.942018	0.951449	0.000145993	7.91708e-05	0.614156	0.911269	0.0784851	0.000627658	0.901142	0.406908	0.000906959	0.277079	-0.173079	0.955956	0.65609	5.65432e-05	0.906838	0.365473	0.00074108	0.333437	0.644961	0.614416	0.060712	0.0783229	-0.0916906	0.970191	0.814513	1.4625e-05	0.2617	0.84716	0.496366	0.00394461	-0.690936	0.280344	0.039307	0.464981	0.613512	0.0882514	0.0788873	0.821378	-0.231151	0.519098	0.549568	0.152121	-0.0780264	0.510749	0.84185
CL12643.Contig1_DB	1	turquoise	0.621236	0.75676	0.0741465	0.0182487	0.272295	0.862702	0.478426	0.00275374	0.529731	-0.306819	0.142426	0.421933	-0.383866	0.670204	0.307766	0.0482272	0.547176	0.911211	0.127327	0.000629067	0.329524	-0.102834	0.386515	0.792347	-0.439419	0.669956	0.236642	0.0483407	-0.102165	0.908329	0.793673	0.000701457	-0.326085	-0.304311	0.391788	0.425932	0.272897	0.741803	0.477415	0.0221314	-0.339328	0.955255	0.371667	5.9719e-05	-0.418662	0.953511	0.262069
CL26232.Contig3_DB	1	turquoise	0.975441	0.690229	7.46251e-06	0.0395918	0.448129	0.691447	0.226387	0.0391017	0.967859	0.242762	1.89941e-05	0.529098	-0.327675	0.683021	0.389345	0.0425742	0.983956	0.345508	1.6958e-06	0.362449	0.483384	0.262284	0.187417	0.49537	-0.0899614	0.69684	0.817964	0.0369785	0.446672	0.668409	0.228085	0.0490548	-0.513698	0.259387	0.157187	0.500318	0.462776	0.19598	0.209701	0.613312	-0.407704	0.453451	0.276048	0.220243	-0.0791173	0.443261	0.839662
CL24579.Contig3_DB	1	turquoise	0.771262	0.892385	0.0149444	0.00120991	0.819678	0.921207	0.00683925	0.000418302	0.85169	0.216508	0.00356691	0.575802	0.278017	0.855437	0.468851	0.0032739	0.792604	0.510296	0.0108484	0.160428	0.831089	0.223106	0.00550523	0.563926	-0.372902	0.829399	0.322945	0.0056905	0.766153	0.922329	0.0160584	0.000398274	-0.813603	0.321339	0.00763189	0.399119	0.83663	0.280702	0.00492683	0.464388	0.223245	0.609481	0.563676	0.0814341	-0.36994	0.701945	0.327108
CL6522.Contig1_DB	1	turquoise	0.79169	0.723138	0.011006	0.0276943	0.144646	0.584062	0.71042	0.0986617	0.770952	0.820421	0.0150105	0.00674635	-0.466508	0.788898	0.205561	0.0114973	0.818117	-0.189572	0.00703726	0.625186	0.176283	0.818968	0.65005	0.00692888	0.21236	0.7886	0.583314	0.0115506	0.310204	0.493185	0.416563	0.177311	-0.228653	0.735611	0.554011	0.0238862	0.162338	-0.470546	0.676466	0.201134	-0.572744	-0.0348513	0.106991	0.929073	0.212713	-4.33843e-05	0.582673
CL8746.Contig2_DB	1	turquoise	0.890295	0.887347	0.00129144	0.00141281	0.474649	0.926441	0.196691	0.000330582	0.868666	0.0613876	0.00237173	0.875334	-0.304363	0.852358	0.425849	0.00351343	0.867479	0.643813	0.0024446	0.0613232	0.513183	0.150755	0.157675	0.698642	-0.512524	0.838934	0.158301	0.00469909	0.266705	0.94092	0.487858	0.000155727	-0.505033	0.0718202	0.165518	0.854317	0.480671	0.408664	0.190271	0.274808	-0.301123	0.724401	0.431039	0.0272918	-0.489895	0.767472	0.180668
CL7758.Contig3_DB	1	turquoise	-0.709188	0.863037	0.0324015	0.00273124	-0.272111	0.860864	0.478736	0.00287949	-0.680946	0.291403	0.043459	0.446778	0.27517	0.863798	0.473605	0.00268058	-0.711275	0.418726	0.0316666	0.261988	-0.289727	0.334243	0.449516	0.379334	-0.269105	0.851396	0.483798	0.0035906	-0.222607	0.848198	0.564821	0.00385576	0.349097	0.306254	0.357147	0.422833	-0.27877	0.157421	0.467599	0.685853	0.368111	0.523477	0.329693	0.148084	-0.268155	0.569163	0.485403
CL221.Contig2_DB	1	turquoise	0.943885	0.814204	0.000130431	0.00755082	0.551027	0.789361	0.124128	0.0114148	0.966087	0.471299	2.28787e-05	0.200315	-0.167476	0.816267	0.666694	0.00727709	0.960847	0.236217	3.76311e-05	0.540601	0.57401	0.410979	0.106039	0.27183	-0.0999993	0.800656	0.797973	0.00952444	0.570495	0.764546	0.108695	0.0164201	-0.597784	0.577556	0.0891098	0.1034	0.56074	-0.00412359	0.116274	0.9916	-0.253526	0.361749	0.510391	0.338759	-0.0832054	0.435873	0.83147
CL18898.Contig3_DB	1	turquoise	0.584019	0.72584	0.0986926	0.0268378	-0.159309	0.682348	0.682244	0.0428602	0.539457	0.338321	0.133886	0.37318	-0.699113	0.733728	0.0361063	0.0244377	0.591431	0.265258	0.0934585	0.490311	-0.127194	0.629659	0.74435	0.0691839	-0.225011	0.776198	0.560514	0.0139182	0.00442034	0.604517	0.990995	0.0846391	0.12867	0.152479	0.741464	0.695327	-0.152832	0.0582987	0.69465	0.881571	-0.695918	0.41733	0.037336	0.263747	-0.197873	0.33916	0.609817
CL13896.Contig2_DB	1	turquoise	0.537126	0.931044	0.135904	0.000264882	0.470282	0.939815	0.201422	0.000165983	0.624019	0.292304	0.0724831	0.445309	0.0797118	0.907277	0.83847	0.000729254	0.578726	0.446562	0.102538	0.228213	0.507478	0.273716	0.163142	0.47604	-0.658121	0.862961	0.0539756	0.00273632	0.724015	0.937648	0.0274146	0.000187454	-0.432807	0.3838	0.24459	0.307857	0.51677	0.175937	0.154293	0.650701	0.078646	0.537418	0.840607	0.13565	-0.67481	0.669761	0.0461435
CL9476.Contig1_DB	1	turquoise	0.961178	0.891457	3.65434e-05	0.00124568	0.535735	0.866139	0.137118	0.00252879	0.931232	0.412457	0.00026241	0.269939	-0.250187	0.894257	0.516165	0.00113998	0.943518	0.264518	0.000133388	0.491568	0.567566	0.377467	0.110938	0.316581	-0.0479251	0.84544	0.902554	0.00409493	0.333133	0.839952	0.381017	0.00460076	-0.611631	0.458978	0.0800692	0.21396	0.539781	0.000754303	0.133607	0.998463	-0.322439	0.358445	0.397414	0.343515	-0.0335539	0.503465	0.931709
CL5793.Contig2_DB	1	turquoise	-0.252915	0.763313	0.511445	0.016701	-0.449731	0.840398	0.224528	0.00455811	-0.166105	-0.16943	0.669298	0.662991	-0.194219	0.697908	0.616567	0.0365669	-0.166905	0.804761	0.667778	0.00889344	-0.44995	0.0595056	0.224274	0.879133	-0.311208	0.722065	0.414976	0.0280393	0.252694	0.862523	0.511827	0.00276581	0.526324	-0.203149	0.145492	0.600119	-0.424838	0.633404	0.254358	0.0670456	-0.168695	0.886028	0.664384	0.0014696	-0.309968	0.834554	0.416937
CL9624.Contig1_DB	1	turquoise	-0.397054	0.86697	0.29	0.00247635	0.192431	0.923906	0.619879	0.000371265	-0.280182	-0.0235488	0.465252	0.952049	0.662654	0.811485	0.0517703	0.0079223	-0.348375	0.721757	0.358211	0.028139	0.124515	0.165643	0.749594	0.670175	0.113411	0.811868	0.771423	0.00786923	0.285916	0.93584	0.45577	0.000206805	-0.111116	-0.0303875	0.775952	0.938143	0.172507	0.499191	0.657171	0.171275	0.642859	0.811839	0.0618343	0.00787324	0.120702	0.825772	0.757074
CL7603.Contig1_DB	1	turquoise	0.509727	-0.871735	0.160974	0.00219015	-0.0359474	-0.817661	0.926847	0.00709585	0.484519	-0.490212	0.186231	0.180343	-0.454145	-0.866109	0.219448	0.00253068	0.524951	-0.272839	0.146739	0.477513	-0.016594	-0.646507	0.966203	0.0598942	0.0736405	-0.882633	0.850657	0.00162303	0.166472	-0.747055	0.668601	0.0207112	0.00450306	-0.414256	0.990827	0.267644	-0.0189423	-0.00956688	0.961423	0.980512	-0.489048	-0.433311	0.181538	0.243979	0.0806572	-0.4258	0.836575
Unigene38345_DB	1	turquoise	0.700691	0.732831	0.0355088	0.0247031	0.462683	0.818976	0.209804	0.0069279	0.706948	-0.183214	0.0332027	0.637043	-0.124711	0.659383	0.749211	0.0533556	0.692861	0.789024	0.0385378	0.0114747	0.500416	-0.0185881	0.170058	0.962144	-0.381033	0.675233	0.311653	0.0459552	0.467766	0.853273	0.204176	0.00344098	-0.474588	-0.155358	0.196757	0.689804	0.486182	0.644442	0.184499	0.060988	-0.133699	0.861697	0.731656	0.00282201	-0.371138	0.837703	0.325421
CL1360.Contig2_DB	1	turquoise	0.805066	0.866504	0.0088478	0.00250565	0.411153	0.820534	0.271607	0.00673234	0.863382	0.407863	0.00270819	0.275843	-0.15959	0.884156	0.681708	0.0015529	0.858815	0.31976	0.00302433	0.401572	0.442332	0.507148	0.233185	0.163461	-0.15838	0.892878	0.684019	0.00119124	0.706822	0.775516	0.0332482	0.0140571	-0.438951	0.315049	0.237199	0.40893	0.446406	0.0502627	0.228396	0.897821	-0.249123	0.44847	0.51801	0.22599	-0.166855	0.441386	0.667874
CL11402.Contig2_DB	1	turquoise	-0.651704	0.735193	0.0571974	0.0240078	-0.724134	0.611505	0.0273766	0.0801486	-0.61838	0.789616	0.0758782	0.0113695	-0.117208	0.799186	0.763942	0.00975741	-0.584816	-0.142757	0.0981215	0.714071	-0.762913	0.825026	0.0167928	0.00618954	0.513815	0.819602	0.157076	0.00684882	-0.197668	0.516451	0.610197	0.154592	0.755129	0.706955	0.0186482	0.0332003	-0.726491	-0.394066	0.0266343	0.293977	-0.142269	0.033559	0.715017	0.931698	0.504104	0.0264389	0.166426
CL14724.Contig2_DB	1	turquoise	0.931426	-0.530696	0.000259882	0.141566	0.511982	-0.588607	0.158818	0.0954322	0.947037	0.146131	0.00010687	0.707551	-0.206783	-0.468952	0.593468	0.202876	0.948794	-0.502269	9.51327e-05	0.168227	0.538008	0.0386016	0.135138	0.921459	-0.172735	-0.450195	0.65674	0.223991	0.484349	-0.603596	0.186408	0.0852424	-0.561535	0.138551	0.115646	0.722223	0.524305	-0.423081	0.147327	0.256539	-0.282345	-0.532041	0.461665	0.14037	-0.163801	-0.593635	0.673678
CL27043.Contig1_DB	1	turquoise	0.532227	0.653106	0.140205	0.0564833	0.262569	0.736585	0.494884	0.0236044	0.60034	-0.0844686	0.0873962	0.828942	-0.0686223	0.603048	0.860751	0.0856029	0.59665	0.574752	0.089877	0.105483	0.273696	-0.168824	0.476074	0.664139	-0.066192	0.532795	0.865646	0.139703	0.620427	0.78526	0.0746344	0.0121592	-0.266921	0.085798	0.487491	0.826282	0.294245	0.394103	0.44215	0.293929	-0.144878	0.572988	0.70997	0.106807	-0.0745071	0.738256	0.848916
CL2513.Contig1_DB	1	turquoise	0.826465	0.944791	0.00602217	0.000123321	0.133826	0.909862	0.731409	0.000662266	0.786309	0.468649	0.0119657	0.203208	-0.592717	0.952241	0.0925679	7.47965e-05	0.827117	0.303859	0.00594733	0.426655	0.197469	0.540858	0.610563	0.13268	-0.252405	0.946688	0.512327	0.000109317	0.260703	0.857783	0.498069	0.00309916	-0.198989	0.449298	0.607762	0.225029	0.163708	0.035312	0.673856	0.928138	-0.627253	0.448791	0.0705796	0.225617	-0.250568	0.494465	0.515505
CL5600.Contig1_DB	1	turquoise	0.952349	-0.425356	7.42161e-05	0.253717	0.426403	-0.258926	0.252424	0.501107	0.943926	-0.773935	0.000130099	0.0143826	-0.329032	-0.530319	0.387267	0.141901	0.961314	0.386098	3.61006e-05	0.304722	0.451685	-0.892369	0.222271	0.00121051	-0.0858242	-0.577913	0.82623	0.103137	0.388473	-0.1279	0.301499	0.74297	-0.486115	-0.510904	0.184569	0.159847	0.433528	0.570491	0.243717	0.108698	-0.403081	0.232338	0.28206	0.547462	-0.0683934	0.330764	0.861212
CL2811.Contig2_DB	1	turquoise	0.887507	0.823729	0.00140604	0.00634304	0.419008	0.906325	0.261634	0.000755078	0.910615	-0.0590385	0.000643579	0.880076	-0.273514	0.751278	0.47638	0.0196143	0.914346	0.731192	0.000556448	0.0251931	0.456176	-0.00934412	0.217132	0.980966	-0.301868	0.719485	0.429843	0.0288806	0.505333	0.941569	0.165225	0.000149921	-0.456837	0.065141	0.216382	0.867764	0.444073	0.523408	0.231131	0.148146	-0.332338	0.788685	0.382225	0.0115354	-0.302566	0.878204	0.428725
Unigene42771_DB	1	turquoise	0.865586	0.908297	0.0025641	0.000702275	0.225488	0.832127	0.55966	0.00539357	0.894382	0.599961	0.00113542	0.0876487	-0.424941	0.949788	0.254231	8.8911e-05	0.915917	0.120509	0.000522357	0.757452	0.255065	0.613325	0.507739	0.0790044	-0.0938697	0.928243	0.810169	0.000303649	0.545904	0.773168	0.128395	0.0145422	-0.267291	0.548857	0.486866	0.125925	0.246626	-0.177817	0.522352	0.647164	-0.512839	0.252227	0.158002	0.512635	-0.0805854	0.330188	0.836719
CL11577.Contig2_DB	1	turquoise	0.94181	0.975594	0.000147805	7.30195e-06	0.533044	0.961728	0.139482	3.47809e-05	0.950798	0.341748	8.28931e-05	0.368044	-0.190845	0.95822	0.622821	4.71154e-05	0.953907	0.462848	6.61663e-05	0.20962	0.562291	0.497849	0.115049	0.172613	-0.0394277	0.960621	0.919783	3.83887e-05	0.550227	0.916407	0.124789	0.000512035	-0.590341	0.290001	0.0942174	0.449068	0.549806	0.190259	0.125137	0.62391	-0.280096	0.604504	0.465393	0.0846479	-0.0312357	0.625212	0.936419
Unigene12088_DB	1	turquoise	0.875046	0.525306	0.00200534	0.146416	0.395867	0.585406	0.291576	0.0977003	0.888752	0.0333507	0.00135402	0.932121	-0.32423	0.465385	0.394645	0.206802	0.888962	0.455941	0.0013454	0.217399	0.443161	-0.00349689	0.232205	0.992876	-0.471877	0.46274	0.199686	0.20974	0.482923	0.616732	0.1879	0.0768884	-0.418595	0.225118	0.262154	0.560321	0.42611	0.352211	0.252786	0.352579	-0.346954	0.52562	0.360309	0.14613	-0.470361	0.56421	0.201336
CL3437.Contig3_DB	1	turquoise	-0.75292	0.494483	0.0191984	0.175996	-0.566697	0.625085	0.11161	0.0718518	-0.707071	-0.439164	0.0331585	0.236945	0.0525668	0.414346	0.893158	0.26753	-0.712953	0.839317	0.0310836	0.00466189	-0.571879	-0.270337	0.107644	0.48172	-0.0824036	0.418539	0.833076	0.262223	-0.088044	0.688282	0.821793	0.0403839	0.642069	-0.395592	0.0622595	0.291943	-0.546382	0.744835	0.127993	0.021304	0.113201	0.84867	0.771837	0.00381578	-0.103157	0.826752	0.791704
Unigene30948_DB	1	turquoise	-0.735021	0.529129	0.0240581	0.142965	-0.474125	0.649508	0.197255	0.0583272	-0.725345	-0.493201	0.0269936	0.177295	0.106519	0.431061	0.785042	0.246713	-0.721483	0.873386	0.0282276	0.00209658	-0.471202	-0.27459	0.20042	0.474576	-0.00714754	0.438872	0.98544	0.237294	-0.212241	0.712476	0.58353	0.0312484	0.521073	-0.511117	0.150292	0.159642	-0.448952	0.806477	0.225431	0.00863834	0.167288	0.881768	0.667052	0.0016638	-0.0445105	0.861614	0.909473
CL12578.Contig2_DB	1	turquoise	0.929333	-0.629479	0.000288126	0.0692876	0.554619	-0.53394	0.121188	0.138692	0.933557	-0.431265	0.00023319	0.246465	-0.224998	-0.663427	0.560536	0.0514005	0.922431	-0.0444668	0.000396485	0.909562	0.596119	-0.622283	0.0902369	0.0735176	-0.521987	-0.68437	0.14945	0.0420056	0.44831	-0.458321	0.226177	0.214701	-0.581441	-0.200824	0.100555	0.604386	0.569709	0.152525	0.109295	0.69524	-0.24089	-0.16259	0.532378	0.675985	-0.504839	-0.132558	0.165707
CL3770.Contig7_DB	1	turquoise	0.287063	0.93007	0.453884	0.00027794	-0.187298	0.903603	0.629419	0.000832425	0.29181	0.327944	0.446113	0.388933	-0.323808	0.9347	0.395297	0.000219703	0.345291	0.416121	0.362771	0.265277	-0.186911	0.457363	0.63014	0.215785	0.645223	0.935639	0.0605727	0.00020904	0.263098	0.862962	0.493984	0.00273621	0.129899	0.23047	0.739065	0.55078	-0.167165	0.149129	0.667284	0.701772	-0.44851	0.538726	0.225943	0.134516	0.633283	0.551093	0.0671145
CL2760.Contig2_DB	1	turquoise	0.763108	0.736896	0.0167481	0.0235146	0.561247	0.73616	0.115873	0.023727	0.779062	0.306648	0.013345	0.422206	-0.0890368	0.753819	0.81981	0.0189733	0.751123	0.282054	0.0196538	0.462147	0.606429	0.222199	0.0833954	0.565553	-0.63049	0.713253	0.0687055	0.0309798	0.455919	0.733552	0.217425	0.0244895	-0.563995	0.389991	0.113712	0.299448	0.587577	0.0445233	0.0961586	0.909448	-0.0758307	0.349851	0.846257	0.356039	-0.630692	0.456125	0.0685895
CL11786.Contig1_DB	1	turquoise	0.751312	0.826368	0.0196057	0.00603331	0.0688009	0.715012	0.860392	0.0303775	0.644719	0.641097	0.0608405	0.0627854	-0.6291	0.876708	0.0695062	0.00191675	0.711619	0.0309278	0.0315463	0.937045	0.108443	0.811863	0.781235	0.00786991	0.107851	0.897861	0.782407	0.00101339	-0.169977	0.611608	0.661954	0.0800841	-0.17513	0.433608	0.652221	0.24362	0.062789	-0.236343	0.872507	0.540379	-0.672381	0.194995	0.0472351	0.615132	0.126208	0.169716	0.74628
CL18090.Contig1_DB	1	turquoise	0.428301	0.91679	0.250088	0.000504056	0.107977	0.858258	0.782156	0.00306454	0.483996	0.555424	0.186777	0.120535	-0.142341	0.929985	0.714877	0.000279098	0.496924	0.194278	0.173539	0.616458	0.126584	0.588991	0.745543	0.0951619	0.0464217	0.918255	0.9056	0.000474368	0.504057	0.795976	0.166472	0.0102798	-0.131056	0.534195	0.736807	0.138468	0.144805	-0.0711261	0.710112	0.855713	-0.229947	0.339034	0.551709	0.372109	0.0222139	0.402953	0.954765
CL11688.Contig1_DB	1	turquoise	-0.465867	0.814146	0.206269	0.0075586	-0.733452	0.873529	0.0245189	0.00208865	-0.492569	-0.0560748	0.177936	0.886064	-0.452897	0.765401	0.220877	0.016227	-0.454171	0.69965	0.219418	0.0359021	-0.703082	0.0427855	0.0346156	0.912971	-0.264858	0.758108	0.490991	0.0179228	-0.331839	0.894558	0.382984	0.00112901	0.765908	-0.0467155	0.0161132	0.905005	-0.715414	0.512456	0.030241	0.158366	-0.366779	0.766025	0.331581	0.0160871	-0.269142	0.790256	0.483737
CL15237.Contig2_DB	1	turquoise	0.891237	0.672828	0.00125423	0.047033	0.166997	0.64309	0.667604	0.0617105	0.849872	0.257312	0.00371534	0.503875	-0.568395	0.665062	0.110301	0.0506229	0.897355	0.33184	0.00103054	0.382982	0.199815	0.458575	0.606242	0.214415	0.0552245	0.704146	0.887783	0.0342228	0.200951	0.615459	0.604153	0.0776751	-0.24698	0.16186	0.521736	0.677376	0.172844	0.129846	0.656534	0.739169	-0.64413	0.461461	0.061154	0.21117	0.0725664	0.395303	0.852816
CL19840.Contig1_DB	1	turquoise	0.628521	0.702422	0.0698417	0.0348607	0.507832	0.557825	0.1628	0.1186	0.609755	0.82676	0.0812594	0.00598823	-0.0413395	0.785939	0.915904	0.0120337	0.597177	-0.25666	0.0895196	0.504996	0.550168	0.82623	0.124838	0.00604931	-0.275937	0.779872	0.472323	0.0131857	0.317469	0.463546	0.405142	0.208843	-0.551059	0.718261	0.124102	0.0292853	0.520288	-0.528869	0.151017	0.143199	-0.0619674	-0.108954	0.874164	0.780226	-0.268635	-0.060173	0.484592
CL5265.Contig8_DB	1	turquoise	-0.581924	0.89498	0.100204	0.00111377	-0.637813	0.824371	0.0645829	0.00626675	-0.583882	0.539445	0.0987914	0.133896	-0.244096	0.907186	0.526764	0.000731697	-0.567976	0.188892	0.110623	0.62645	-0.615319	0.633686	0.0777616	0.0668867	-0.357765	0.895864	0.344498	0.00108224	-0.26463	0.757512	0.491378	0.0180664	0.697573	0.459479	0.0366954	0.213396	-0.614266	-0.0960867	0.0784162	0.805754	-0.140476	0.326803	0.718489	0.390684	-0.372629	0.382775	0.323327
CL6767.Contig1_DB	1	turquoise	0.853773	0.692038	0.00340189	0.0388655	0.0311343	0.595138	0.936625	0.0909057	0.823659	0.540517	0.00635147	0.132973	-0.675225	0.732094	0.0459586	0.0249228	0.877326	0.0505747	0.00188454	0.89719	0.0715594	0.822143	0.854841	0.00653429	-0.0321177	0.785283	0.934627	0.012155	0.249566	0.486795	0.517243	0.183863	-0.0985752	0.298033	0.800803	0.436016	0.0472828	-0.169234	0.903856	0.663362	-0.742046	0.225654	0.0220642	0.559364	-0.0164668	0.125315	0.966462
CL13346.Contig3_DB	1	turquoise	0.86706	0.687852	0.00247074	0.0405602	0.427691	0.727008	0.250838	0.0264732	0.826678	0.0900227	0.00599763	0.817841	-0.276256	0.618616	0.47179	0.0757338	0.852481	0.519602	0.00350366	0.151653	0.456148	0.155985	0.217165	0.688603	0.103261	0.620175	0.791499	0.0747865	0.283003	0.744027	0.460577	0.0215225	-0.506793	0.206462	0.163806	0.594055	0.437717	0.356714	0.238674	0.346019	-0.352866	0.615053	0.35162	0.0779266	0.109568	0.650127	0.77901
CL13113.Contig1_DB	1	turquoise	0.928655	0.879753	0.000297705	0.00176158	0.702294	0.934598	0.0349085	0.000220881	0.959549	0.0240144	4.21305e-05	0.951102	-0.00552991	0.828981	0.988735	0.00573701	0.93482	0.658747	0.000218324	0.0536675	0.725522	0.0856106	0.0269377	0.826657	-0.200879	0.786562	0.604285	0.0119194	0.637546	0.957064	0.06473	5.17781e-05	-0.736325	0.0869593	0.0236792	0.823961	0.71461	0.411317	0.0305146	0.271397	-0.0770173	0.71511	0.843875	0.0303441	-0.187071	0.825386	0.629841
CL11763.Contig1_DB	1	turquoise	0.476192	0.821558	0.195034	0.00660583	-0.0900939	0.862724	0.817699	0.00275223	0.477794	0.103246	0.193323	0.791529	-0.494634	0.795937	0.175843	0.0102863	0.504888	0.519182	0.165659	0.152043	-0.0479556	0.0558151	0.902493	0.886589	-0.209677	0.74294	0.588192	0.0218185	0.285141	0.892531	0.457047	0.00120434	0.0766999	0.212514	0.844512	0.583033	-0.0589297	0.284889	0.880296	0.457463	-0.510158	0.565656	0.160561	0.112417	-0.209767	0.704381	0.588027
CL2497.Contig1_DB	1	turquoise	0.952671	0.982836	7.25006e-05	2.14486e-06	0.62186	0.982533	0.0737715	2.27983e-06	0.922093	0.283757	0.000402424	0.45933	-0.172258	0.966543	0.657641	2.18283e-05	0.924467	0.501204	0.000361984	0.169278	0.660762	0.393702	0.0526836	0.294465	-0.19195	0.954029	0.620771	6.55648e-05	0.328664	0.953966	0.387831	6.5872e-05	-0.691153	0.257072	0.0392198	0.504287	0.632544	0.229599	0.0675331	0.552329	-0.223589	0.620884	0.56306	0.0743586	-0.187919	0.671937	0.628263
CL1922.Contig1_DB	1	turquoise	0.650418	0.789015	0.0578574	0.0114764	0.218007	0.808314	0.573096	0.00837078	0.643407	0.165915	0.0615402	0.669659	-0.256525	0.756495	0.505228	0.0183132	0.669938	0.421291	0.0483494	0.258772	0.226901	0.22051	0.557136	0.568588	0.351698	0.730323	0.353329	0.0254556	0.368043	0.8019	0.329788	0.00933005	-0.280403	0.209197	0.464883	0.589065	0.22183	0.236157	0.566216	0.540706	-0.363008	0.505668	0.336955	0.164899	0.36926	0.600959	0.328068
CL23754.Contig1_DB	1	turquoise	0.337314	0.841302	0.374694	0.00447256	-0.22554	0.720063	0.559568	0.0286906	0.290513	0.778545	0.44823	0.0134472	-0.482473	0.891104	0.188372	0.00125945	0.361187	-0.0747495	0.339565	0.848429	-0.200839	0.843286	0.604358	0.00428866	0.479665	0.892058	0.191334	0.00122244	0.04525	0.6221	0.907975	0.0736273	0.146651	0.681013	0.706548	0.0434301	-0.201938	-0.362964	0.60234	0.337017	-0.569894	0.0954666	0.109153	0.806988	0.463139	0.13382	0.209296
CL28713.Contig1_DB	1	turquoise	0.741942	0.717957	0.0220928	0.0293864	0.119102	0.707923	0.760217	0.0328524	0.779684	0.391525	0.0132226	0.297382	-0.403954	0.731194	0.280921	0.0251927	0.806977	0.152466	0.00856496	0.695353	0.143596	0.195153	0.712448	0.614841	0.0532866	0.657091	0.891702	0.0544846	0.535452	0.704978	0.137365	0.033918	-0.160555	0.554039	0.679866	0.12166	0.146556	-0.0736266	0.706731	0.850685	-0.506642	0.204212	0.163952	0.59817	0.0520572	0.402084	0.894189
CL25639.Contig1_DB	1	turquoise	0.811294	0.975477	0.00794872	7.42418e-06	0.590933	0.946536	0.0938042	0.000110397	0.747036	0.416403	0.0207164	0.26492	-0.166059	0.97642	0.669386	6.47823e-06	0.743728	0.382532	0.0216036	0.309593	0.630776	0.497344	0.0685415	0.173118	-0.43005	0.969061	0.247946	1.66402e-05	0.0596662	0.902276	0.878809	0.000872064	-0.645704	0.380619	0.0603179	0.312223	0.585146	0.101068	0.0978854	0.795851	-0.150765	0.518107	0.698623	0.153044	-0.409191	0.560071	0.274129
Unigene33571_DB	1	turquoise	0.836998	0.844028	0.00488996	0.00422125	0.149051	0.795454	0.701922	0.0103664	0.748628	0.372856	0.0202982	0.323009	-0.638059	0.830386	0.0644469	0.00558179	0.800461	0.350696	0.00955508	0.354798	0.212516	0.57941	0.58303	0.102036	-0.238285	0.861065	0.536957	0.00286557	-0.026222	0.735909	0.946611	0.0237998	-0.237632	0.240277	0.538105	0.533454	0.162628	0.114987	0.675912	0.768317	-0.652952	0.501869	0.0565614	0.168622	-0.231942	0.456892	0.548165
CL13754.Contig1_DB	1	turquoise	-0.805814	0.904372	0.00873639	0.000810028	-0.487957	0.955208	0.182662	5.99348e-05	-0.765591	0.0616189	0.0161844	0.874867	0.15413	0.850718	0.692159	0.00364574	-0.785041	0.666649	0.0121998	0.0498755	-0.512444	0.19081	0.158378	0.622887	-0.219504	0.833955	0.570397	0.00520057	-0.268083	0.961257	0.485525	3.62858e-05	0.5781	0.100639	0.102998	0.796703	-0.492802	0.428139	0.177699	0.250287	0.247196	0.757839	0.521359	0.0179875	-0.221954	0.816868	0.565993
CL28156.Contig1_DB	1	turquoise	0.96101	-0.829489	3.70923e-05	0.00568054	0.428629	-0.870378	0.249686	0.00226918	0.924646	-0.0933749	0.000359055	0.811155	-0.392234	-0.796828	0.296431	0.0101393	0.943313	-0.592748	0.000135068	0.092546	0.477475	-0.117829	0.193663	0.762721	-0.230882	-0.770551	0.550048	0.0150961	0.319854	-0.886584	0.401425	0.00144547	-0.496623	-0.155361	0.173841	0.689798	0.442347	-0.351569	0.233167	0.353518	-0.437491	-0.660121	0.238944	0.0529953	-0.216713	-0.727012	0.575432
Unigene38443_DB	1	turquoise	0.728284	0.910696	0.0260783	0.0006416	0.607261	0.883169	0.082858	0.00159807	0.713957	0.42933	0.0307379	0.248827	-0.0388363	0.924027	0.920983	0.000369247	0.687681	0.29612	0.0406305	0.43911	0.651824	0.483258	0.0571363	0.187549	-0.447188	0.89693	0.227482	0.00104512	0.357229	0.838942	0.345273	0.00469829	-0.637062	0.416947	0.064998	0.264232	0.616293	0.00777574	0.0771591	0.98416	-0.0394558	0.412274	0.919726	0.270172	-0.431651	0.496526	0.245994
CL3014.Contig1_DB	1	turquoise	0.725369	0.85873	0.026986	0.00303043	0.689184	0.903138	0.0400158	0.00084615	0.785346	-0.0586422	0.0121432	0.880877	0.21071	0.810829	0.586312	0.0080136	0.751152	0.742147	0.0196466	0.0220364	0.683277	0.192916	0.0424662	0.61898	0.0576275	0.825394	0.882927	0.0061464	0.69954	0.90602	0.035944	0.000763482	-0.706685	-0.161022	0.0332976	0.678974	0.696671	0.521572	0.0370436	0.149832	0.114297	0.830794	0.769677	0.00553737	0.069201	0.799777	0.859586
Unigene35211_DB	1	turquoise	0.424274	0.898414	0.255058	0.000994871	0.173993	0.95401	0.654366	6.56562e-05	0.439075	-0.0523421	0.237051	0.893613	-0.192632	0.841928	0.619506	0.00441401	0.430862	0.771506	0.246956	0.0148925	0.21261	0.16329	0.58286	0.674651	-0.37965	0.845529	0.313559	0.00408708	0.352828	0.96253	0.351676	3.23211e-05	-0.164681	-0.102526	0.672003	0.792957	0.205322	0.542723	0.596138	0.131087	-0.179677	0.859247	0.643671	0.00299339	-0.384716	0.858074	0.306605
CL3189.Contig3_DB	1	turquoise	0.72272	0.759389	0.0278284	0.0176169	0.0569721	0.829161	0.884251	0.00571695	0.616088	-0.142435	0.0772858	0.714696	-0.678555	0.711705	0.0444928	0.0315165	0.668536	0.737517	0.0489963	0.0233365	0.117357	0.0407877	0.763649	0.917023	-0.331681	0.713	0.383225	0.0310672	-0.16621	0.837193	0.669099	0.00487052	-0.126314	-0.201107	0.746072	0.603866	0.0646494	0.562009	0.868755	0.115271	-0.649883	0.79584	0.0581334	0.0103022	-0.314804	0.784455	0.409315
CL17423.Contig1_DB	1	turquoise	0.791679	0.979491	0.0110079	3.98672e-06	0.240247	0.923177	0.533506	0.000383595	0.810333	0.525691	0.00808322	0.146066	-0.376217	0.99409	0.318316	5.19465e-08	0.82172	0.27097	0.00658598	0.480655	0.253144	0.629656	0.51105	0.0691854	-0.171719	0.990514	0.65866	2.71207e-07	0.384854	0.860482	0.306417	0.0029061	-0.265163	0.457037	0.490472	0.216155	0.238541	-0.023165	0.536506	0.95283	-0.431342	0.423669	0.246371	0.255808	-0.137093	0.46377	0.725054
CL2820.Contig1_DB	1	turquoise	0.684386	0.947261	0.0419989	0.000105323	0.411073	0.877634	0.27171	0.00186859	0.627575	0.550424	0.0703914	0.124626	-0.145311	0.969103	0.709135	1.65634e-05	0.652756	0.236459	0.0566609	0.540174	0.415899	0.654384	0.265558	0.0558375	0.233409	0.971134	0.545564	1.30805e-05	-0.00875752	0.811009	0.98216	0.00798855	-0.497584	0.455283	0.172878	0.218149	0.396922	-0.062169	0.290175	0.873758	-0.216733	0.388312	0.575395	0.301717	0.239459	0.409233	0.534891
CL2301.Contig1_DB	1	turquoise	-0.738241	0.312978	0.02313	0.412185	-0.596153	0.307737	0.0902139	0.420475	-0.789425	0.155789	0.0114034	0.688977	0.00417991	0.304062	0.991485	0.42633	-0.746849	0.164971	0.0207658	0.671453	-0.633404	0.278051	0.0670459	0.468795	0.726677	0.362752	0.0265762	0.337322	-0.604785	0.276032	0.0844642	0.472164	0.574831	0.129418	0.105424	0.740005	-0.623182	0.128138	0.072981	0.742504	-0.00873516	0.274419	0.982206	0.474863	0.719559	0.164241	0.0288562
CL3155.Contig11_DB	1	turquoise	-0.807288	-0.692736	0.00851954	0.0385874	-0.738122	-0.568362	0.0231638	0.110326	-0.800007	-0.761341	0.00962682	0.0171572	-0.04948	-0.73564	0.899406	0.0238778	-0.770844	0.155603	0.0150334	0.689335	-0.784846	-0.798404	0.0122361	0.00988294	0.449631	-0.733955	0.224643	0.0243707	-0.4158	-0.482784	0.265683	0.188046	0.778761	-0.70253	0.0134046	0.0348205	-0.755321	0.421935	0.0186009	0.257968	-0.0327856	0.00208927	0.93327	0.995744	0.450602	-0.0445991	0.22352
CL17310.Contig1_DB	1	turquoise	0.916744	0.954014	0.000505019	6.56347e-05	0.390489	0.947673	0.298777	0.000102512	0.874618	0.316328	0.0020286	0.406927	-0.387541	0.930899	0.302762	0.000266807	0.901598	0.464314	0.000892812	0.207989	0.44256	0.392578	0.232915	0.295969	-0.148423	0.919062	0.703131	0.000458561	0.275715	0.919334	0.472693	0.000453299	-0.470522	0.317914	0.20116	0.404449	0.411287	0.205699	0.271436	0.59545	-0.442941	0.586673	0.232465	0.0967982	-0.150373	0.641767	0.699376
CL474.Contig3_DB	1	turquoise	0.981447	0.74651	2.81272e-06	0.0208557	0.452182	0.858778	0.221699	0.00302695	0.937552	-0.270864	0.000188447	0.480833	-0.397329	0.660647	0.289635	0.0527397	0.956215	0.850904	5.54038e-05	0.00363061	0.49919	-0.195672	0.171276	0.613881	-0.286881	0.630188	0.454184	0.0688789	0.246965	0.916923	0.521762	0.00050131	-0.521373	-0.173187	0.150015	0.655887	0.460476	0.686957	0.212274	0.0409287	-0.432618	0.873508	0.24482	0.00208978	-0.27057	0.947275	0.481328
Unigene3663_DB	1	turquoise	0.950859	0.660732	8.25392e-05	0.0526981	0.606018	0.522333	0.0836619	0.149132	0.9208	0.701811	0.000425741	0.0350885	-0.219036	0.740789	0.57124	0.0224127	0.915152	-0.138183	0.000538773	0.722938	0.646112	0.864031	0.0601026	0.00266516	-0.423389	0.780483	0.256156	0.0130666	0.287656	0.408857	0.45291	0.27456	-0.654203	0.454193	0.0559288	0.219393	0.609528	-0.380154	0.0814043	0.312864	-0.233114	0.0258714	0.546088	0.947325	-0.403273	-0.0503567	0.28181
CL9175.Contig3_DB	1	turquoise	0.708492	-0.619739	0.0326493	0.0750511	-0.00853496	-0.539735	0.982614	0.133645	0.691877	-0.536191	0.0389297	0.136719	-0.626418	-0.682238	0.0710677	0.0429067	0.73045	0.00576595	0.0254171	0.988254	0.0434927	-0.548166	0.911537	0.126501	-0.360189	-0.676383	0.341	0.0454457	0.276844	-0.472928	0.470807	0.198549	-0.0175937	-0.441002	0.964168	0.23476	0.0254471	0.250685	0.948188	0.515302	-0.633949	-0.0960399	0.066738	0.805847	-0.35602	-0.109616	0.347026
CL12965.Contig2_DB	1	turquoise	0.871765	0.562093	0.00218844	0.115205	0.588329	0.571754	0.095628	0.107739	0.869458	0.239512	0.00232388	0.534797	-0.128412	0.549387	0.741969	0.125485	0.857274	0.151016	0.00313649	0.698139	0.617567	0.0973702	0.0763756	0.8032	-0.343424	0.465695	0.365546	0.206459	0.395897	0.584777	0.291537	0.0981495	-0.618325	0.413915	0.0759119	0.268078	0.600661	-0.0348744	0.0871822	0.929026	-0.153219	0.171515	0.693907	0.659045	-0.334675	0.395482	0.37868
CL4445.Contig1_DB	1	turquoise	0.656403	0.507414	0.0548267	0.163204	0.483325	0.614732	0.187479	0.0781259	0.563519	-0.278006	0.114084	0.46887	-0.12392	0.401774	0.75076	0.283773	0.58282	0.705655	0.099556	0.0336709	0.501735	-0.229835	0.168754	0.551908	0.0200062	0.392922	0.959257	0.295509	-0.161109	0.683527	0.678808	0.0423606	-0.568977	-0.108417	0.109855	0.781287	0.46525	0.633057	0.206952	0.0672421	-0.144363	0.734199	0.710967	0.024299	0.0323778	0.78124	0.934098
CL9078.Contig7_DB	1	turquoise	-0.774959	0.827624	0.0141712	0.00588961	-0.899721	0.886149	0.000952028	0.00146431	-0.772471	0.0538521	0.0146885	0.890558	-0.276369	0.782414	0.471602	0.0126945	-0.730205	0.586294	0.0254914	0.0970678	-0.914989	0.0229034	0.000542309	0.953362	0.226483	0.737306	0.557882	0.0233971	-0.39139	0.910604	0.297564	0.000643856	0.939384	0.177643	0.000170105	0.64749	-0.897405	0.383414	0.00102882	0.308384	-0.239713	0.640527	0.534445	0.0630949	0.219076	0.764086	0.571168
CL16840.Contig1_DB	1	turquoise	0.72701	0.849829	0.0264725	0.00371893	0.503041	0.744863	0.167468	0.0212965	0.687016	0.699073	0.0409043	0.0361216	-0.150815	0.898491	0.698527	0.000992299	0.689393	0.00863026	0.0399306	0.98242	0.555625	0.817919	0.120372	0.00706272	-0.425427	0.911931	0.25363	0.000611827	0.17634	0.65087	0.649941	0.0576248	-0.555103	0.576228	0.120795	0.104384	0.527224	-0.273084	0.144679	0.477102	-0.149427	0.181949	0.701197	0.63941	-0.440915	0.1866	0.234862
Unigene3831_DB	1	turquoise	-0.533496	0.631633	0.139084	0.0680515	-0.780694	0.615894	0.0130255	0.0774055	-0.532682	0.362269	0.139802	0.338013	-0.380535	0.630716	0.312339	0.0685762	-0.494306	0.0865394	0.176175	0.8248	-0.768803	0.240493	0.0154739	0.533075	0.00670572	0.562696	0.98634	0.11473	-0.206568	0.602382	0.593861	0.0860417	0.818686	0.494709	0.0069647	0.175768	-0.761017	-0.0991076	0.017233	0.799745	-0.334176	0.14146	0.379435	0.716582	-0.00150924	0.338057	0.996925
Unigene41886_DB	1	turquoise	-0.506327	0.790789	0.164258	0.011163	-0.0892759	0.842359	0.819332	0.00437389	-0.430331	-0.0795803	0.247603	0.838733	0.471117	0.721805	0.200513	0.0281235	-0.449878	0.744785	0.224357	0.0213174	-0.134622	0.140308	0.729859	0.718815	0.529381	0.748642	0.14274	0.0202943	0.148998	0.857964	0.702023	0.0030859	0.111066	-0.120315	0.776051	0.757835	-0.0860937	0.566118	0.825691	0.112058	0.401171	0.840491	0.284564	0.00454926	0.498717	0.793925	0.171747
CL9113.Contig1_DB	1	turquoise	0.776963	-0.782813	0.0137636	0.0126186	0.223111	-0.66951	0.563917	0.0485459	0.813379	-0.745947	0.00766231	0.0210058	-0.366324	-0.840196	0.332226	0.00457735	0.822118	0.136652	0.00653733	0.72591	0.24255	-0.715968	0.529469	0.0300534	-0.247723	-0.805598	0.520442	0.00876846	0.452502	-0.591368	0.221331	0.0935018	-0.240921	-0.703758	0.532324	0.0343659	0.23465	0.421979	0.543369	0.257913	-0.421834	0.00843235	0.258093	0.982823	-0.22932	-0.109658	0.552824
CL10428.Contig1_DB	1	turquoise	0.923281	0.718838	0.000381818	0.0290942	0.361201	0.81206	0.339546	0.00784272	0.928221	-0.212784	0.000303965	0.582543	-0.356483	0.624315	0.346356	0.0723074	0.944319	0.791294	0.000126992	0.0110747	0.383765	-0.0727692	0.307905	0.852408	-0.047418	0.610481	0.903582	0.0807977	0.447628	0.864435	0.22697	0.00263866	-0.412542	-0.127064	0.269829	0.744604	0.368412	0.624931	0.329266	0.0719428	-0.437552	0.839077	0.238872	0.00468515	-0.0257446	0.890364	0.947582
CL14043.Contig1_DB	1	turquoise	0.661261	-0.51536	0.052442	0.155617	0.832198	-0.529961	0.00538598	0.142221	0.758089	-0.193559	0.0179275	0.617789	0.38841	-0.501624	0.301584	0.168863	0.685002	-0.20115	0.0417408	0.603786	0.834015	0.0563872	0.00519432	0.885433	-0.414735	-0.419243	0.267035	0.261338	0.809277	-0.573216	0.00823278	0.106635	-0.802594	-0.414232	0.00922283	0.267674	0.846124	-0.0237433	0.00403466	0.951653	0.347635	-0.19975	0.359303	0.606361	-0.404846	-0.409367	0.279758
CL7138.Contig1_DB	1	turquoise	0.572402	0.898515	0.107249	0.000991522	0.645262	0.810065	0.060552	0.00812109	0.502042	0.630003	0.168451	0.0689855	0.0964543	0.930125	0.805022	0.000277192	0.489304	0.138227	0.181274	0.722851	0.680553	0.76596	0.0436279	0.0161015	-0.201032	0.955984	0.604004	5.64205e-05	0.0332301	0.722452	0.932366	0.0279146	-0.70526	0.507043	0.0338147	0.163564	0.645922	-0.133836	0.0602028	0.731388	0.103443	0.318222	0.791138	0.403968	-0.201585	0.291752	0.602988
CL13391.Contig1_DB	1	turquoise	0.679476	0.951662	0.0440925	7.79733e-05	0.630292	0.949064	0.0688195	9.34128e-05	0.770317	0.308502	0.0151465	0.419259	0.207978	0.935992	0.591287	0.000205119	0.725419	0.4769	0.0269704	0.194277	0.617901	0.428095	0.0761707	0.250341	-0.0525655	0.938936	0.893161	0.00017447	0.731533	0.916558	0.0250908	0.000508887	-0.628807	0.290288	0.0696757	0.448598	0.631168	0.220646	0.0683171	0.568344	0.113652	0.612618	0.770948	0.0794473	-0.0347661	0.632804	0.929246
CL615.Contig1_DB	1	turquoise	0.619127	0.70201	0.0754228	0.0350144	0.586299	0.767808	0.0970643	0.0156917	0.694618	-0.055886	0.0378438	0.886446	0.199262	0.624789	0.607259	0.0720268	0.65629	0.618736	0.0548829	0.0756607	0.586537	-0.0494723	0.0968952	0.899421	0.0247605	0.576571	0.949584	0.104128	0.701132	0.811436	0.035343	0.00792904	-0.598032	0.0799641	0.0889427	0.837964	0.597565	0.426117	0.0892574	0.252777	0.102507	0.648234	0.792995	0.0589895	0.0276916	0.777494	0.943623
Unigene36890_DB	1	turquoise	0.658116	0.707748	0.053978	0.032915	0.102682	0.579294	0.792646	0.102121	0.573605	0.767022	0.106343	0.0158651	-0.557622	0.788207	0.118762	0.0116211	0.616411	-0.195064	0.0770862	0.615004	0.161263	0.855526	0.678514	0.00326712	-0.385844	0.799173	0.305068	0.0097596	-0.123408	0.459372	0.751765	0.213516	-0.170584	0.599425	0.660805	0.0880074	0.110528	-0.438923	0.777113	0.237232	-0.538525	-0.0340443	0.13469	0.930712	-0.374773	-0.0327898	0.320329
CL22604.Contig1_DB	1	turquoise	0.875303	-0.303117	0.00199147	0.427842	0.233388	-0.209141	0.545602	0.589168	0.887164	-0.525017	0.0014206	0.146679	-0.445096	-0.343313	0.22993	0.365711	0.911956	0.177361	0.000611253	0.648022	0.260981	-0.620151	0.497593	0.0748014	-0.124643	-0.378156	0.749344	0.315625	0.411965	-0.137915	0.270568	0.723456	-0.281089	-0.444125	0.463745	0.23107	0.246984	0.338228	0.521728	0.373319	-0.520596	0.0574789	0.150733	0.883227	-0.110686	0.119555	0.776803
CL19112.Contig1_DB	1	turquoise	-0.661132	0.726749	0.0525044	0.0265539	-0.30446	0.833223	0.425695	0.0052773	-0.539908	-0.234237	0.133497	0.544099	0.355139	0.639478	0.348307	0.0636676	-0.57912	0.797061	0.102248	0.0101012	-0.343453	-0.158085	0.365502	0.684583	0.0438137	0.611418	0.910886	0.0802041	0.238499	0.895155	0.53658	0.00110749	0.392922	-0.109505	0.295509	0.779135	-0.299622	0.637803	0.433453	0.0645884	0.350178	0.829702	0.355558	0.00565705	0.0362731	0.911564	0.926186
CL693.Contig3_DB	1	turquoise	0.587161	0.798721	0.0964525	0.00983201	-0.16285	0.735609	0.675489	0.0238868	0.460866	0.429339	0.211837	0.248816	-0.769692	0.834588	0.015281	0.0051349	0.542351	0.167994	0.131404	0.665712	-0.115027	0.548937	0.768237	0.125858	0.0341914	0.838887	0.930414	0.00470362	-0.333451	0.674196	0.380535	0.0464181	0.065583	0.285168	0.866873	0.457002	-0.164898	-0.0577269	0.671593	0.882726	-0.777487	0.291607	0.0136581	0.446445	0.0514948	0.303964	0.895327
CL1740.Contig1_DB	1	turquoise	0.652549	0.839477	0.0567665	0.00464642	-0.201954	0.847783	0.60231	0.00389115	0.555461	0.244038	0.120505	0.526867	-0.82947	0.799703	0.00568269	0.0096751	0.639053	0.493005	0.0639005	0.177493	-0.143732	0.352262	0.712185	0.352504	-0.0168779	0.794775	0.965625	0.0104799	-0.149513	0.826109	0.701032	0.00606326	0.109153	0.266322	0.779831	0.488506	-0.184859	0.243332	0.633969	0.528101	-0.856021	0.605902	0.00322979	0.0837371	-0.0138939	0.637444	0.9717
CL2838.Contig1_DB	1	turquoise	0.928797	0.892439	0.000295681	0.00120786	0.594739	0.86934	0.0911782	0.00233097	0.87986	0.340905	0.00175628	0.369305	-0.234754	0.881943	0.543185	0.00165548	0.880585	0.374745	0.00172074	0.320367	0.645955	0.376742	0.0601856	0.317587	-0.414199	0.850285	0.267717	0.00368125	0.227634	0.849872	0.555828	0.00371539	-0.656257	0.339413	0.0548992	0.37154	0.603754	0.0926231	0.0851388	0.812654	-0.244211	0.470032	0.526563	0.201695	-0.402649	0.564227	0.282626
CL20925.Contig8_DB	1	turquoise	0.786192	0.937577	0.0119872	0.000188188	0.738453	0.95603	0.0230697	5.62173e-05	0.841489	0.192531	0.00445499	0.619694	0.143602	0.913779	0.712437	0.00056911	0.791613	0.543876	0.0110193	0.130107	0.753959	0.237303	0.0189382	0.538686	-0.418835	0.88229	0.261851	0.00163909	0.614433	0.955976	0.078312	5.64547e-05	-0.740116	0.218575	0.0226008	0.572071	0.743855	0.277944	0.0215691	0.468974	0.10569	0.629351	0.786684	0.0693613	-0.402366	0.719149	0.282997
Unigene40977_DB	1	turquoise	0.883048	0.667739	0.00160368	0.0493661	0.410482	0.797623	0.272469	0.0100094	0.881868	-0.372834	0.00165906	0.32304	-0.343747	0.579771	0.365065	0.101772	0.881687	0.8601	0.00166768	0.00293291	0.452681	-0.289628	0.221126	0.449679	-0.537281	0.546826	0.135769	0.127621	0.365811	0.867662	0.332955	0.00243327	-0.436539	-0.269533	0.240086	0.483077	0.42222	0.730918	0.257612	0.0252756	-0.35272	0.863704	0.351834	0.0026868	-0.514637	0.942211	0.156299
Unigene31630_DB	1	turquoise	0.183948	0.656063	0.63567	0.0549957	-0.258275	0.682536	0.502224	0.04278	0.180422	0.207994	0.642272	0.591258	-0.354344	0.647644	0.349464	0.0592976	0.225606	0.31899	0.559449	0.40277	-0.256451	0.139903	0.505355	0.7196	0.505754	0.598029	0.164815	0.088945	0.109637	0.690595	0.778874	0.0394443	0.204827	0.344539	0.597045	0.363888	-0.260525	0.104913	0.498372	0.788223	-0.453684	0.370817	0.219976	0.325873	0.51761	0.501492	0.153508
CL21510.Contig1_DB	1	turquoise	0.97627	0.950584	6.62273e-06	8.41464e-05	0.499331	0.93267	0.171135	0.000244056	0.952975	0.384491	7.09014e-05	0.306912	-0.314985	0.937234	0.409032	0.000191762	0.964623	0.366649	2.64874e-05	0.331765	0.542601	0.428204	0.131191	0.250208	-0.243669	0.90758	0.527512	0.000721162	0.372866	0.905608	0.322996	0.000774936	-0.563173	0.413363	0.114356	0.268782	0.512688	0.0911723	0.158145	0.815547	-0.366522	0.483933	0.331945	0.186843	-0.230823	0.588885	0.550152
CL9470.Contig2_DB	1	turquoise	-0.615329	-0.88965	0.0777556	0.00131736	-0.790768	-0.820658	0.0111666	0.00671687	-0.650375	-0.461996	0.0578796	0.210571	-0.264013	-0.898731	0.492426	0.00098437	-0.582501	-0.267666	0.0997866	0.486231	-0.822823	-0.702976	0.00645185	0.0346549	0.714969	-0.919144	0.0303922	0.000456969	-0.493514	-0.744001	0.176977	0.0215296	0.77286	-0.283211	0.0146068	0.460232	-0.80125	0.0116033	0.00943122	0.976365	-0.293748	-0.423915	0.442959	0.255503	0.704049	-0.401076	0.0342587
CL5598.Contig2_DB	1	turquoise	-0.590206	0.781572	0.0943111	0.0128558	-0.0213077	0.78303	0.956609	0.0125774	-0.581971	0.119548	0.10017	0.759341	0.505481	0.749027	0.165081	0.0201942	-0.60158	0.522256	0.0865718	0.149203	-0.0488199	0.299502	0.900742	0.433647	0.417326	0.758495	0.263752	0.0178301	-0.104178	0.760535	0.789681	0.0173461	0.0379404	0.0168177	0.922801	0.965747	-0.0159535	0.311107	0.967507	0.415136	0.502373	0.616222	0.168125	0.0772029	0.381682	0.60088	0.310761
CL6419.Contig3_DB	1	turquoise	0.84383	-0.713489	0.00423916	0.0308988	0.306974	-0.777376	0.421688	0.0136805	0.884965	-0.0411855	0.00151651	0.916216	-0.352556	-0.642697	0.352074	0.0619216	0.886211	-0.553062	0.00146163	0.122458	0.347942	0.0106126	0.35885	0.978382	-0.402421	-0.599017	0.282924	0.0882806	0.61012	-0.820448	0.0810266	0.00674295	-0.323014	-0.249548	0.396523	0.517274	0.335341	-0.367786	0.377672	0.330152	-0.40005	-0.605166	0.286039	0.0842163	-0.38932	-0.739054	0.300353
CL21521.Contig1_DB	1	turquoise	0.981345	0.942511	2.86704e-06	0.000141759	0.433866	0.96802	0.243308	1.86643e-05	0.977222	0.167777	5.74322e-06	0.666124	-0.365949	0.911215	0.332759	0.000628962	0.988243	0.600298	5.73663e-07	0.0874243	0.474712	0.272245	0.196624	0.478511	-0.254577	0.905954	0.508579	0.000765311	0.458252	0.962442	0.214779	3.2585e-05	-0.485204	0.176051	0.185516	0.650487	0.450069	0.352663	0.224136	0.351917	-0.422834	0.709853	0.256847	0.0321662	-0.238477	0.742272	0.536617
CL5385.Contig6_DB	1	turquoise	0.905329	0.892425	0.000782774	0.00120841	0.171423	0.920082	0.659218	0.000439094	0.885018	0.106605	0.00151416	0.784873	-0.585171	0.851813	0.0978675	0.00355704	0.921866	0.583063	0.000406458	0.0993804	0.213464	0.225724	0.581312	0.559238	-0.224888	0.824551	0.560733	0.00624544	0.30239	0.911737	0.429007	0.000616446	-0.225923	0.0907651	0.558882	0.81636	0.186694	0.341141	0.630544	0.368952	-0.633189	0.662123	0.0671676	0.0520255	-0.205778	0.738815	0.595305
CL6650.Contig1_DB	1	turquoise	0.831201	0.917148	0.00549312	0.00049668	0.656662	0.869189	0.0546974	0.00234004	0.892663	0.484526	0.00119935	0.186223	0.0325144	0.917503	0.933821	0.000489462	0.854154	0.25421	0.00337228	0.509211	0.675856	0.494536	0.0456786	0.175942	-0.468451	0.893837	0.203425	0.00115543	0.665278	0.833329	0.0505209	0.00526618	-0.651927	0.495527	0.0570833	0.174942	0.673769	-0.019512	0.0466094	0.960263	-0.0035409	0.378988	0.992787	0.314474	-0.456854	0.472079	0.216362
CL17611.Contig2_DB	1	turquoise	0.761635	0.754688	0.0170887	0.0187571	-0.0491431	0.654028	0.900088	0.0560167	0.668066	0.618866	0.0492142	0.0755815	-0.758203	0.802816	0.0179	0.00918882	0.737542	0.0342836	0.0233294	0.930226	-0.00952805	0.763494	0.980591	0.0166595	-0.0249995	0.847561	0.949098	0.00391012	-0.160628	0.559854	0.679725	0.116978	-0.0378906	0.453765	0.922902	0.219882	-0.0539552	-0.187259	0.89035	0.629492	-0.785396	0.211589	0.0121339	0.584713	-0.000679901	0.137409	0.998615
CL5583.Contig1_DB	1	turquoise	0.925557	0.70201	0.000344392	0.0350142	0.232586	0.558711	0.547023	0.11789	0.890407	0.739239	0.00128697	0.0228472	-0.552671	0.778811	0.122777	0.0133946	0.925722	-0.186382	0.000341797	0.631126	0.274698	0.877732	0.474395	0.00186357	-0.175421	0.791568	0.651672	0.0110272	0.26965	0.44472	0.482879	0.23037	-0.293468	0.515264	0.443414	0.155708	0.245316	-0.445729	0.524634	0.229188	-0.59817	-0.0328023	0.0888495	0.933236	-0.15587	-0.037325	0.688824
Unigene34512_DB	1	turquoise	0.642416	0.221209	0.0620725	0.567331	0.106632	0.0731895	0.784819	0.851563	0.582609	0.629639	0.0997082	0.0691952	-0.466947	0.295931	0.205077	0.439416	0.626887	-0.384753	0.0707933	0.306554	0.136659	0.853118	0.725896	0.00345321	-0.0764955	0.378012	0.844923	0.315825	0.0180546	-0.0589123	0.963229	0.880331	-0.161701	0.353024	0.67768	0.351389	0.116892	-0.472455	0.764564	0.19906	-0.484117	-0.22414	0.18665	0.562073	-0.06813	-0.39227	0.861742
CL7113.Contig2_DB	1	turquoise	-0.374583	0.886691	0.320594	0.00144088	-0.417985	0.883397	0.262921	0.00158758	-0.284303	0.241808	0.458429	0.530768	-0.0149602	0.878544	0.969529	0.00182211	-0.285382	0.425553	0.45665	0.253474	-0.424482	0.296807	0.254799	0.437998	0.0688422	0.835015	0.860309	0.00509089	0.336633	0.874725	0.375721	0.00202276	0.481729	0.231499	0.189155	0.548951	-0.379096	0.14505	0.314325	0.709638	-0.0298724	0.499148	0.93919	0.171317	0.042185	0.614531	0.914189
CL22482.Contig3_DB	1	turquoise	0.835446	0.722118	0.00504676	0.0280222	0.809518	0.779365	0.00819852	0.0132854	0.880975	-0.158784	0.00170181	0.683247	0.164462	0.669084	0.672421	0.0487424	0.832283	0.765067	0.00537692	0.0163023	0.827814	0.134312	0.00586806	0.730462	-0.459312	0.704056	0.213583	0.0342559	0.612683	0.780374	0.0794069	0.0130878	-0.814829	-0.289606	0.00746716	0.449714	0.818111	0.588488	0.00703808	0.0955155	0.133295	0.845649	0.732443	0.00407649	-0.444589	0.754142	0.230525
CL10357.Contig1_DB	1	turquoise	0.68109	-0.735007	0.0433974	0.0240623	0.0763385	-0.621996	0.845238	0.0736901	0.6407	-0.630875	0.0630011	0.0684848	-0.463704	-0.777453	0.208667	0.0136651	0.690088	-0.02016	0.039649	0.958944	0.100279	-0.786167	0.797417	0.0119918	0.344878	-0.804821	0.363384	0.00888445	0.180644	-0.535515	0.641855	0.13731	-0.163272	-0.459833	0.674686	0.212997	0.0803855	0.253751	0.837119	0.510003	-0.563993	-0.178318	0.113713	0.646221	0.356594	-0.136685	0.346194
CL8078.Contig1_DB	1	turquoise	0.623622	0.867882	0.0727185	0.00241968	0.386808	0.928202	0.303756	0.000304235	0.628838	0.039569	0.0696582	0.919496	-0.171503	0.81392	0.659068	0.00758902	0.616189	0.650133	0.0772231	0.0580047	0.450088	0.0980971	0.224115	0.801754	-0.635727	0.786253	0.0657406	0.0119761	0.416902	0.950487	0.264288	8.47146e-05	-0.398082	0.134915	0.288638	0.729288	0.427233	0.429381	0.251401	0.248765	-0.152895	0.72601	0.694529	0.0267847	-0.646586	0.813485	0.0598526
CL11594.Contig2_DB	1	turquoise	0.522204	0.839646	0.149251	0.0046301	0.222074	0.76907	0.565776	0.0154159	0.52426	0.519802	0.147368	0.151468	-0.175629	0.874061	0.651282	0.00205915	0.532216	0.195611	0.140215	0.613994	0.208126	0.624209	0.591017	0.0723704	0.00507332	0.898037	0.989665	0.00100746	0.143589	0.706499	0.712461	0.0333647	-0.242934	0.409536	0.528796	0.273685	0.200844	-0.0623384	0.60435	0.873416	-0.217633	0.34917	0.573769	0.35704	0.0421491	0.316031	0.914261
CL26176.Contig1_DB	1	turquoise	0.833544	0.983683	0.00524354	1.79827e-06	0.224602	0.954861	0.561246	6.15515e-05	0.837041	0.392083	0.00488565	0.296633	-0.42955	0.97887	0.248557	4.42336e-06	0.866344	0.401915	0.0025158	0.283588	0.263085	0.532802	0.494006	0.139696	-0.12627	0.979821	0.746159	3.76843e-06	0.400966	0.905762	0.284834	0.000770648	-0.281641	0.324713	0.462831	0.3939	0.248285	0.126927	0.519466	0.744873	-0.50418	0.545979	0.166351	0.128332	-0.124954	0.572915	0.748735
Unigene33618_DB	1	turquoise	0.604672	0.593018	0.0845384	0.0923603	0.716763	0.70198	0.0297857	0.0350256	0.628882	-0.353022	0.0696324	0.351393	0.253297	0.499037	0.510786	0.171428	0.582155	0.822666	0.100037	0.00647083	0.71131	-0.273423	0.0316543	0.476533	-0.223544	0.474215	0.563141	0.197159	0.315589	0.782662	0.408084	0.0126472	-0.733031	-0.257663	0.0246436	0.503273	0.695287	0.682671	0.0375821	0.0427227	0.219503	0.822026	0.570399	0.00654861	-0.198686	0.880048	0.60832
CL11883.Contig1_DB	1	turquoise	0.283397	0.811835	0.459925	0.00787378	0.17538	0.756763	0.651751	0.018248	0.257284	0.451565	0.503924	0.222409	-0.0174312	0.829429	0.964499	0.00568723	0.282681	0.223864	0.46111	0.562566	0.173932	0.644832	0.65448	0.0607801	0.329841	0.842061	0.38603	0.00440155	-0.00884884	0.689662	0.981974	0.0398214	-0.239769	0.332307	0.534347	0.382273	0.17582	-0.046947	0.650922	0.904536	-0.0892899	0.368025	0.819304	0.329814	0.313447	0.361065	0.411448
CL28875.Contig4_DB	1	turquoise	0.918036	0.858817	0.000478739	0.00302419	0.320363	0.916507	0.400635	0.000509941	0.903298	-0.0381769	0.000841403	0.922321	-0.431362	0.791936	0.246347	0.0109633	0.930285	0.706074	0.000275029	0.0335188	0.366346	0.145259	0.332195	0.709234	-0.215486	0.785678	0.577649	0.0120818	0.358777	0.924073	0.343035	0.00036848	-0.382953	-0.0416778	0.309016	0.915218	0.344291	0.510027	0.364256	0.160687	-0.489811	0.79158	0.180754	0.0110251	-0.215112	0.827845	0.578326
Unigene37757_DB	1	turquoise	0.784241	0.642928	0.0123491	0.0617971	0.573881	0.726908	0.106136	0.0265042	0.787484	-0.225118	0.0117515	0.560321	-0.0949846	0.561525	0.807948	0.115653	0.763227	0.778369	0.0167207	0.0134822	0.615447	-0.0673691	0.0776821	0.863275	-0.449233	0.56633	0.225105	0.111894	0.467528	0.780337	0.204438	0.013095	-0.593793	-0.181738	0.0918268	0.639807	0.587799	0.612264	0.0960015	0.07967	-0.104801	0.824705	0.788445	0.00622728	-0.430651	0.818819	0.247213
CL2031.Contig1_DB	1	turquoise	0.887164	0.905883	0.0014206	0.000767286	0.644036	0.955233	0.0612045	5.98169e-05	0.949302	0.0126835	9.19169e-05	0.974165	-0.000934451	0.846076	0.998096	0.00403892	0.918889	0.717126	0.00046192	0.029664	0.664498	0.185338	0.0508903	0.633075	-0.24787	0.847606	0.520187	0.00390623	0.755182	0.95734	0.018635	5.06354e-05	-0.659689	-0.000791604	0.0532059	0.998387	0.662444	0.504132	0.0518713	0.166398	-0.0775983	0.81527	0.842709	0.00740846	-0.235609	0.829981	0.541674
CL12088.Contig1_DB	1	turquoise	0.880628	0.449718	0.00171867	0.224543	0.139118	0.344347	0.721122	0.364173	0.804334	0.542765	0.00895778	0.131051	-0.652597	0.467931	0.0567421	0.203995	0.85975	-0.0756158	0.0029576	0.846689	0.188883	0.720583	0.626467	0.0285206	-0.148999	0.536271	0.702021	0.136649	0.00753242	0.249335	0.984656	0.517642	-0.226502	0.38585	0.557849	0.305059	0.146639	-0.206377	0.706572	0.59421	-0.686697	0.090829	0.041036	0.816232	-0.136012	-0.0340616	0.727155
Unigene30754_DB	1	turquoise	0.737915	0.929189	0.0232228	0.000290139	0.717795	0.983519	0.0294403	1.86212e-06	0.836262	0.013639	0.00496385	0.972219	0.219511	0.871866	0.570385	0.00218263	0.780715	0.728277	0.0130216	0.0260804	0.733486	0.155177	0.0245091	0.690151	-0.389204	0.859094	0.30051	0.0030043	0.854465	0.996987	0.00334823	4.92933e-09	-0.702534	0.0312158	0.0348191	0.936459	0.745186	0.490346	0.0212095	0.180205	0.159318	0.815715	0.682227	0.00734958	-0.391094	0.862226	0.297962
CL7707.Contig1_DB	1	turquoise	0.889852	0.906136	0.00130922	0.000760274	0.710796	0.907285	0.0318342	0.000729046	0.91335	0.252266	0.000578852	0.512567	-0.000782558	0.892438	0.998406	0.00120789	0.88371	0.431156	0.0015732	0.246598	0.745942	0.339073	0.0210071	0.37205	-0.430133	0.860426	0.247845	0.00291007	0.583582	0.892409	0.0990065	0.00120901	-0.73036	0.249921	0.0254445	0.516626	0.733712	0.16709	0.0244423	0.667427	-0.0307426	0.525315	0.937421	0.146408	-0.427504	0.625478	0.251067
CL15020.Contig2_DB	1	turquoise	0.796441	0.824189	0.0102029	0.00628833	0.180117	0.91454	0.642844	0.000552147	0.821202	-0.205859	0.00664961	0.595157	-0.416676	0.747531	0.264574	0.0205856	0.843819	0.850249	0.00424017	0.00368423	0.210915	-0.0255257	0.585939	0.948028	-0.0104358	0.735675	0.978742	0.0238677	0.536578	0.953392	0.136381	6.87552e-05	-0.225518	-0.192069	0.559607	0.620549	0.200347	0.650004	0.605264	0.058071	-0.509541	0.903303	0.161153	0.000841248	0.00405877	0.936009	0.991732
CL25839.Contig1_DB	1	turquoise	-0.908352	0.806337	0.000700858	0.008659	-0.588948	0.68593	0.0951925	0.0413538	-0.865802	0.780272	0.00255022	0.0131076	0.181508	0.873096	0.640236	0.00211283	-0.872402	-0.112414	0.00215203	0.77339	-0.630536	0.826387	0.0686793	0.00603117	0.149012	0.878605	0.701997	0.001819	-0.259512	0.588102	0.500104	0.0957879	0.667501	0.679658	0.0494774	0.044014	-0.596999	-0.38611	0.0896403	0.304705	0.232992	0.0562954	0.546304	0.885618	0.145484	0.0808562	0.708801
CL21633.Contig1_DB	1	turquoise	0.693887	0.813656	0.0381316	0.00762474	0.239907	0.890702	0.534104	0.0012753	0.704367	-0.0833539	0.0341418	0.831173	-0.247188	0.745763	0.521373	0.021055	0.728166	0.716218	0.0261147	0.0299692	0.253063	-0.0295973	0.51119	0.939749	0.33689	0.721575	0.375333	0.028198	0.479843	0.927318	0.191146	0.000317269	-0.29937	0.00908054	0.43386	0.981503	0.255104	0.539721	0.507671	0.133658	-0.365268	0.773691	0.333729	0.0144334	0.342598	0.849985	0.366777
CL14130.Contig2_DB	1	turquoise	0.854888	0.825064	0.00331575	0.00618509	0.254016	0.707475	0.509547	0.033013	0.885348	0.776011	0.00149951	0.0139562	-0.400531	0.883779	0.285406	0.00157003	0.897845	-0.116397	0.00101391	0.765538	0.279995	0.777797	0.465562	0.0135962	-0.209847	0.86507	0.587882	0.00259732	0.503001	0.619825	0.167508	0.074999	-0.282134	0.712804	0.462015	0.0311349	0.269612	-0.403254	0.482943	0.281835	-0.466582	0.0337114	0.20548	0.931389	-0.191953	0.117594	0.620765
CL24669.Contig2_DB	1	turquoise	0.949925	0.527622	8.80818e-05	0.14432	0.517056	0.440397	0.154025	0.235478	0.904146	0.558137	0.00081655	0.11835	-0.299684	0.58868	0.433353	0.0953811	0.915854	-0.211432	0.000523695	0.585	0.55153	0.408171	0.123714	0.275446	-0.217399	0.517817	0.574192	0.153314	0.194147	0.397874	0.616701	0.288914	-0.586188	0.570567	0.0971433	0.10864	0.51417	-0.427078	0.15674	0.251593	-0.337244	-0.166559	0.3748	0.668435	-0.196737	0.0192955	0.611915
CL29393.Contig1_DB	1	turquoise	0.840642	-0.639726	0.0045349	0.0635317	0.769787	-0.485787	0.0152605	0.18491	0.826898	-0.858179	0.00597244	0.00307027	0.0644268	-0.722617	0.869204	0.0278615	0.799072	0.299599	0.00977567	0.433492	0.799472	-0.935111	0.00971185	0.00021499	-0.342453	-0.751796	0.366993	0.0194825	0.321846	-0.354182	0.398332	0.3497	-0.816111	-0.6856	0.00729751	0.0414913	0.770523	0.523253	0.0151022	0.148288	0.0383605	0.119811	0.921948	0.758823	-0.334662	0.154091	0.378699
CL13844.Contig2_DB	1	turquoise	-0.746037	0.958949	0.0209818	4.43319e-05	0.0583752	0.930519	0.881416	0.000271864	-0.720242	0.370443	0.0286319	0.326399	0.718606	0.956838	0.0291709	5.27264e-05	-0.769	0.367959	0.015431	0.329907	-0.00190389	0.481754	0.996121	0.189128	0.374823	0.935787	0.320259	0.000207389	-0.21351	0.892716	0.581228	0.00119735	-0.0135673	0.317543	0.972365	0.405027	0.0276189	0.0840794	0.943771	0.829721	0.735312	0.487117	0.0239732	0.18353	0.369534	0.564238	0.327681
Unigene38088_DB	1	turquoise	0.690086	0.942022	0.0396498	0.000145957	0.0932286	0.945264	0.811447	0.000119713	0.665427	0.274081	0.0504504	0.475429	-0.458759	0.927485	0.214207	0.000314784	0.712511	0.457021	0.0312364	0.216173	0.136572	0.309967	0.726066	0.416939	0.0600698	0.89607	0.877994	0.00107502	0.244821	0.937807	0.525499	0.000185812	-0.169752	0.306513	0.66238	0.42242	0.122449	0.189373	0.753645	0.625556	-0.537088	0.555193	0.135937	0.120723	0.0446666	0.655288	0.909157
CL27727.Contig1_DB	1	turquoise	0.94976	0.882189	8.90872e-05	0.00164388	0.321372	0.786308	0.399067	0.0119658	0.914732	0.710486	0.000547921	0.031943	-0.48859	0.933925	0.182009	0.000228791	0.944081	-0.00362121	0.000128872	0.992623	0.370045	0.70722	0.326961	0.0331047	-0.242423	0.913805	0.529692	0.000568545	0.286884	0.706844	0.454179	0.0332404	-0.388939	0.661225	0.300869	0.0524593	0.336083	-0.294243	0.376552	0.442154	-0.53424	0.14253	0.138429	0.714511	-0.227537	0.223797	0.556001
CL612.Contig24_DB	1	turquoise	-0.627939	0.505641	0.0701796	0.164925	-0.270102	0.5804	0.482117	0.101312	-0.570022	-0.250176	0.109056	0.516184	0.311519	0.437345	0.414486	0.23912	-0.591125	0.645128	0.0936709	0.0606231	-0.319169	-0.190292	0.402492	0.623849	0.141025	0.41075	0.717426	0.272125	-0.0784996	0.631674	0.840901	0.068028	0.343879	-0.215587	0.364869	0.577466	-0.275335	0.51685	0.473329	0.154218	0.338913	0.639187	0.37229	0.0638269	0.13158	0.691314	0.735785
CL4332.Contig2_DB	1	turquoise	0.591429	0.834116	0.0934599	0.00518388	0.0584886	0.876243	0.881187	0.00194129	0.537967	0.0103265	0.135173	0.978965	-0.435322	0.79631	0.24155	0.0102245	0.587381	0.659511	0.0962972	0.0532929	0.0750687	0.176384	0.847788	0.649859	0.211736	0.810871	0.584447	0.00800779	0.0649169	0.879218	0.868216	0.00178817	-0.121242	-0.0316698	0.756013	0.935537	0.0644627	0.466966	0.869132	0.205057	-0.488586	0.75579	0.182013	0.0184855	0.222701	0.734342	0.564652
CL8413.Contig2_DB	1	turquoise	-0.784093	0.875238	0.0123769	0.00199497	-0.594908	0.906818	0.0910628	0.000741619	-0.732873	0.0454563	0.0246905	0.907557	0.106281	0.824525	0.785513	0.00624852	-0.724737	0.653094	0.0271853	0.0564897	-0.613463	0.243064	0.0789177	0.52857	0.261939	0.833684	0.495959	0.00522889	-0.0735848	0.895481	0.850769	0.00109582	0.645168	-0.0179544	0.0606017	0.963433	-0.574133	0.449605	0.105946	0.224674	0.111983	0.75579	0.77424	0.0184856	0.228273	0.751441	0.554688
CL18343.Contig1_DB	1	turquoise	0.480866	0.465308	0.190065	0.206887	0.393302	0.457035	0.294999	0.216157	0.603058	0.236645	0.0855964	0.539846	0.102315	0.450153	0.793376	0.224039	0.550446	0.208592	0.124608	0.590168	0.401518	0.242768	0.284108	0.529087	-0.463665	0.485042	0.20871	0.185685	0.809951	0.441933	0.00813708	0.233656	-0.34464	0.28992	0.363738	0.4492	0.413053	0.128904	0.269178	0.741009	0.0633867	0.317765	0.871301	0.404681	-0.445955	0.271491	0.228923
CL17160.Contig1_DB	1	turquoise	0.802253	0.816497	0.0092754	0.00724687	0.159326	0.773947	0.682211	0.0143801	0.708236	0.298404	0.0327405	0.435417	-0.576475	0.82131	0.1042	0.00663627	0.764979	0.393149	0.0163222	0.295204	0.212756	0.594798	0.582595	0.0911377	-0.000429695	0.873925	0.999125	0.00206664	-0.0470652	0.703161	0.904296	0.0345863	-0.263161	0.0722703	0.493877	0.853411	0.168073	0.168208	0.665562	0.665307	-0.61906	0.547053	0.0754634	0.12743	0.00330499	0.434357	0.993267
CL12386.Contig1_DB	1	turquoise	0.679663	0.556355	0.0440118	0.119783	-0.0431334	0.670583	0.912266	0.0480536	0.608159	-0.280914	0.0822799	0.464036	-0.637617	0.491166	0.0646907	0.179366	0.675304	0.691103	0.0459236	0.0392397	-0.0100604	-0.3671	0.979507	0.331125	0.12103	0.433723	0.75643	0.243481	-0.102484	0.752956	0.793041	0.0191895	-0.0507596	-0.0975659	0.896815	0.80281	-0.0429891	0.565229	0.912558	0.112749	-0.697607	0.665315	0.0366827	0.0505032	0.128461	0.79566	0.741874
CL9407.Contig1_DB	1	turquoise	0.797555	0.65887	0.0100206	0.0536073	0.416513	0.527047	0.26478	0.144839	0.858002	0.764284	0.00308315	0.0164794	-0.153843	0.716799	0.692709	0.0297737	0.847971	-0.149346	0.00387506	0.701353	0.433606	0.886693	0.243622	0.00144079	-0.249341	0.749478	0.517632	0.020077	0.626389	0.417549	0.071085	0.263471	-0.42678	0.617864	0.251959	0.0761938	0.439253	-0.405048	0.23684	0.279494	-0.221521	0.0267055	0.56677	0.945628	-0.245784	-0.0201183	0.523818
Unigene31010_DB	1	turquoise	-0.510841	-0.541713	0.159907	0.131948	-0.364801	-0.61563	0.334394	0.0775688	-0.426048	0.155597	0.252862	0.689346	0.105159	-0.501089	0.787736	0.169392	-0.446191	-0.512184	0.228647	0.158624	-0.370303	0.244441	0.326596	0.526162	-0.200263	-0.42428	0.605417	0.25505	0.21189	-0.67585	0.584167	0.0456813	0.453765	0.0311812	0.219883	0.93653	-0.330836	-0.357725	0.384511	0.344557	0.146908	-0.477866	0.706052	0.193247	-0.225452	-0.6515	0.559725
CL8190.Contig2_DB	1	turquoise	0.869678	0.509325	0.00231071	0.161361	0.301627	0.599332	0.430231	0.0880695	0.832187	-0.117627	0.00538717	0.763117	-0.418212	0.45239	0.262636	0.22146	0.8658	0.508074	0.0025504	0.162566	0.347423	-0.267541	0.359615	0.486442	0.0167424	0.375639	0.965901	0.319121	0.310629	0.675522	0.415891	0.0458265	-0.38294	0.135445	0.309034	0.728258	0.321465	0.353589	0.398923	0.350564	-0.492692	0.486174	0.177811	0.184508	0.0188924	0.673966	0.961524
CL5156.Contig7_DB	1	turquoise	0.922265	0.984346	0.000399393	1.55617e-06	0.180935	0.960219	0.64131	3.97628e-05	0.870099	0.362699	0.00228569	0.337397	-0.617221	0.979501	0.076588	3.98042e-06	0.917127	0.437282	0.000497111	0.239196	0.227305	0.49391	0.556415	0.176576	-0.160332	0.979865	0.680291	3.73986e-06	0.157953	0.917489	0.684835	0.000489745	-0.25717	0.294185	0.50412	0.442247	0.191729	0.158174	0.621181	0.684414	-0.662963	0.573979	0.0516225	0.106062	-0.144052	0.59614	0.711568
Unigene35564_DB	1	turquoise	0.81722	0.664581	0.00715284	0.0508506	0.377873	0.699168	0.316017	0.0360854	0.877262	0.0443586	0.00188788	0.909781	-0.222481	0.651567	0.565046	0.0572677	0.868253	0.502126	0.00239688	0.168368	0.40851	0.184731	0.275008	0.634207	-0.270136	0.670158	0.482059	0.0482483	0.732412	0.674416	0.0248277	0.0463193	-0.38806	-0.0222147	0.302057	0.954763	0.4073	0.355554	0.276572	0.347703	-0.290936	0.587681	0.447541	0.0960847	-0.258665	0.541135	0.501556
CL17266.Contig1_DB	1	turquoise	-0.538813	0.841888	0.134442	0.00441769	-0.0911461	0.720028	0.815599	0.0287022	-0.471021	0.78328	0.200617	0.0125299	0.438854	0.904911	0.237315	0.000794597	-0.503633	-0.078675	0.166887	0.840549	-0.123734	0.857242	0.751124	0.00313887	0.267417	0.912241	0.486652	0.000604527	0.0837662	0.616415	0.830348	0.0770837	0.12304	0.661867	0.752487	0.0521492	-0.0992568	-0.368167	0.799448	0.329613	0.407613	0.0947447	0.276167	0.808426	0.257093	0.111776	0.504252
CL8396.Contig1_DB	1	turquoise	0.883683	0.947318	0.00157442	0.000104932	0.154372	0.92081	0.691694	0.000425558	0.822856	0.399087	0.00644782	0.28731	-0.635505	0.948745	0.0658649	9.5449e-05	0.868084	0.330761	0.00240728	0.384626	0.207199	0.439358	0.592709	0.236714	-0.199992	0.910623	0.605916	0.000643393	0.139854	0.888477	0.719695	0.00136539	-0.226507	0.39534	0.557839	0.292279	0.166267	0.0401317	0.668989	0.918354	-0.665938	0.436765	0.0502095	0.239815	-0.180672	0.552221	0.641803
CL7817.Contig2_DB	1	turquoise	0.849114	-0.487786	0.00377853	0.182838	0.67673	-0.584465	0.0452926	0.0983728	0.82743	0.235957	0.00591164	0.54106	-0.0606387	-0.414431	0.876846	0.267422	0.81101	-0.601229	0.00798839	0.0868046	0.720771	0.286864	0.0284592	0.454211	-0.48027	-0.351031	0.190694	0.354306	0.307612	-0.668986	0.420673	0.0487877	-0.720967	0.0435813	0.0283953	0.911357	0.689135	-0.453263	0.0400355	0.220458	-0.0679078	-0.574523	0.86219	0.105655	-0.476462	-0.728122	0.194745
CL21314.Contig1_DB	1	turquoise	0.648641	-0.51544	0.0587777	0.155543	0.0936279	-0.662196	0.810651	0.0519905	0.676543	0.418106	0.045375	0.262769	-0.394273	-0.411573	0.293701	0.271069	0.698191	-0.806067	0.0364585	0.00869885	0.111964	0.45042	0.774278	0.223731	-0.2007	-0.365286	0.604613	0.333703	0.324676	-0.759296	0.393957	0.0176388	-0.116538	0.19403	0.765261	0.616918	0.107433	-0.724345	0.783233	0.0273097	-0.446412	-0.782845	0.228389	0.0126124	-0.192693	-0.89925	0.619394
Unigene13534_DB	1	turquoise	-0.588387	0.915306	0.0955866	0.000535444	-0.124423	0.951764	0.749775	7.74105e-05	-0.523261	0.0591436	0.148282	0.879864	0.488545	0.870621	0.182055	0.00225489	-0.541887	0.683579	0.1318	0.0423384	-0.168317	0.200574	0.6651	0.604845	0.559074	0.867541	0.1176	0.00244079	0.0870637	0.957754	0.823752	4.89579e-05	0.14681	0.0399547	0.706241	0.918713	-0.120326	0.443023	0.757813	0.232368	0.429009	0.776878	0.24922	0.0137806	0.524882	0.796355	0.146802
CL12844.Contig2_DB	1	turquoise	0.786638	0.834288	0.0119055	0.00516598	0.519081	0.893364	0.152137	0.001173	0.779146	-0.0500984	0.0133285	0.898154	-0.0740502	0.789409	0.849834	0.0114063	0.786726	0.68082	0.0118894	0.043513	0.531163	0.032414	0.141149	0.934025	0.135472	0.753201	0.728204	0.0191277	0.335784	0.91782	0.377003	0.000483063	-0.591968	-0.0324843	0.0930859	0.933882	0.518888	0.454146	0.152316	0.219447	-0.171375	0.724118	0.65931	0.0273818	0.142034	0.809534	0.715471
CL200.Contig5_DB	1	turquoise	0.82122	0.918672	0.00664741	0.000466152	0.716407	0.86639	0.0299054	0.00251285	0.856787	0.520486	0.00317253	0.150835	0.135908	0.931699	0.727356	0.000256347	0.831261	0.256969	0.00548671	0.504465	0.720345	0.656489	0.0285982	0.0547836	0.0781003	0.941611	0.841702	0.000149547	0.593047	0.793124	0.0923398	0.0107593	-0.76293	0.446423	0.016789	0.228376	0.717553	-0.0202103	0.0295211	0.958842	0.0302902	0.418605	0.938341	0.26214	0.088828	0.424501	0.820227
CL29455.Contig1_DB	1	turquoise	0.684222	0.973127	0.042068	1.02028e-05	0.542544	0.985038	0.131239	1.32937e-06	0.703234	0.246733	0.0345594	0.522166	0.00242372	0.946837	0.995062	0.000108267	0.680882	0.530158	0.0434866	0.142045	0.551447	0.306585	0.123782	0.422306	-0.352001	0.920999	0.352885	0.000422091	0.328438	0.97543	0.388176	7.47362e-06	-0.549843	0.275467	0.125107	0.473109	0.54595	0.257867	0.128356	0.502923	-0.0120223	0.633897	0.975511	0.0667674	-0.343267	0.717776	0.365779
CL5955.Contig2_DB	1	turquoise	0.844815	0.909573	0.00415054	0.000669518	0.223484	0.903487	0.563247	0.000835825	0.855002	0.239673	0.00330701	0.534515	-0.446165	0.905754	0.228677	0.000770871	0.878312	0.455393	0.00183389	0.218024	0.269786	0.332509	0.48265	0.381965	-0.171699	0.881527	0.658697	0.00167532	0.506381	0.891561	0.164206	0.00124163	-0.271751	0.196223	0.479341	0.612863	0.252547	0.179777	0.512081	0.643482	-0.516296	0.545891	0.154738	0.128405	-0.165128	0.617039	0.671154
Unigene675_DB	1	turquoise	0.900505	0.644103	0.000926968	0.0611684	0.282591	0.772614	0.461258	0.0146585	0.865179	-0.348184	0.0025903	0.358493	-0.468805	0.556741	0.203037	0.119471	0.899993	0.838857	0.000943295	0.00470659	0.326629	-0.325394	0.390951	0.392851	-0.091584	0.5223	0.814726	0.149162	0.245094	0.84857	0.525022	0.00382423	-0.362864	-0.207044	0.337161	0.592991	0.295209	0.71615	0.440587	0.0299922	-0.535807	0.839343	0.137055	0.00465941	-0.0842823	0.921014	0.829315
CL6742.Contig2_DB	1	turquoise	0.683942	0.708222	0.0421857	0.0327454	-0.0139271	0.731154	0.971632	0.0252047	0.679148	0.108384	0.0442348	0.781352	-0.50398	0.678549	0.166547	0.0444955	0.732066	0.500867	0.0249311	0.169612	-0.00137047	0.248187	0.997208	0.519637	0.388269	0.67201	0.301775	0.0474029	0.320091	0.72781	0.401057	0.0262247	-0.0562603	0.101427	0.885689	0.795138	-0.00346493	0.264211	0.992941	0.49209	-0.624767	0.579786	0.0720398	0.10176	0.399027	0.59936	0.287388
CL4638.Contig2_DB	1	turquoise	0.808655	0.904404	0.00832169	0.000809105	0.495778	0.814488	0.17469	0.00751278	0.792612	0.601604	0.0108469	0.0865564	-0.148713	0.943046	0.702573	0.000137267	0.801058	0.142954	0.0094613	0.713691	0.51811	0.767726	0.153041	0.0157097	-0.066426	0.954398	0.865175	6.37625e-05	0.260944	0.725933	0.497656	0.0268089	-0.563694	0.438859	0.113947	0.237309	0.497552	-0.158145	0.17291	0.684468	-0.217328	0.304302	0.57432	0.425947	-0.0610719	0.30058	0.875971
CL9267.Contig1_DB	1	turquoise	0.728862	0.630265	0.0259008	0.0688348	-0.0920509	0.522829	0.813794	0.148677	0.672978	0.559996	0.0469651	0.116865	-0.704798	0.69231	0.0339839	0.0387569	0.745132	-0.0961506	0.0212241	0.805626	-0.0505916	0.607313	0.897155	0.0828246	0.151264	0.682939	0.697663	0.0426089	0.0698126	0.444117	0.858355	0.231079	0.00323662	0.395282	0.993406	0.292355	-0.0737138	-0.311473	0.85051	0.414559	-0.778972	0.00650281	0.0133627	0.986753	0.150033	0.0439334	0.70003
CL16062.Contig1_DB	1	turquoise	0.919544	0.851496	0.000449288	0.00358254	0.309958	0.873938	0.416953	0.00206592	0.922685	0.213469	0.000392065	0.581301	-0.408764	0.837229	0.27468	0.00486687	0.944992	0.489608	0.00012178	0.180962	0.341389	0.243572	0.368581	0.52768	-0.0477405	0.827257	0.902928	0.00593136	0.457397	0.864686	0.215747	0.00262225	-0.36915	0.258524	0.328223	0.501797	0.322518	0.26615	0.397291	0.488798	-0.495553	0.590673	0.174917	0.0939857	-0.0300606	0.630991	0.938807
CL5999.Contig1_DB	1	turquoise	-0.515436	0.782298	0.155546	0.0127167	-0.459549	0.873198	0.213316	0.00210712	-0.419434	-0.155789	0.261098	0.688978	0.0174955	0.707676	0.964368	0.032941	-0.438656	0.774916	0.237551	0.0141801	-0.480387	-0.031983	0.19057	0.9349	-0.244168	0.694173	0.526639	0.0380188	0.151902	0.913325	0.696436	0.000579405	0.557568	-0.0802997	0.118806	0.837291	-0.449162	0.597503	0.225187	0.0892993	0.0591204	0.83384	0.879911	0.00521261	-0.23894	0.881395	0.535804
CL21948.Contig2_DB	1	turquoise	0.74685	0.625898	0.0207657	0.0713732	0.261808	0.60901	0.496181	0.081735	0.710483	0.219482	0.031944	0.570437	-0.311224	0.61555	0.414951	0.0776186	0.747348	0.377023	0.020634	0.317197	0.262	0.481637	0.495854	0.189251	0.382352	0.667163	0.309841	0.0496349	0.158037	0.555869	0.684674	0.120175	-0.345552	0.0819093	0.362385	0.834066	0.246933	0.180994	0.521818	0.641199	-0.41683	0.509506	0.26438	0.161187	0.407473	0.393356	0.276348
CL4012.Contig1_DB	1	turquoise	0.822964	0.740676	0.00643486	0.0224441	0.427493	0.856014	0.251081	0.00323033	0.809376	-0.281922	0.00821877	0.462365	-0.320351	0.652648	0.400653	0.0567162	0.801556	0.867656	0.00938353	0.00243366	0.488184	-0.190707	0.182427	0.623077	-0.712524	0.625266	0.0312316	0.0717451	0.318185	0.919684	0.404025	0.000446618	-0.448837	-0.177276	0.225564	0.648182	0.448921	0.694631	0.225467	0.0378387	-0.295753	0.892362	0.439704	0.00121079	-0.701484	0.959621	0.035211
CL19996.Contig1_DB	1	turquoise	0.908714	0.536372	0.000691462	0.136561	0.194943	0.468185	0.615229	0.203717	0.873066	0.319519	0.00211453	0.401947	-0.568789	0.559464	0.109998	0.117289	0.913008	0.116256	0.000586686	0.765817	0.234835	0.646231	0.543041	0.0600397	-0.0967353	0.627135	0.804463	0.0706483	0.267573	0.376842	0.486389	0.317448	-0.260249	0.049313	0.498845	0.899744	0.206874	-0.0148977	0.593301	0.969656	-0.624443	0.264672	0.0722317	0.491306	-0.0766909	0.126693	0.84453
CL1458.Contig1_DB	1	turquoise	0.720811	-0.419414	0.0284464	0.261123	0.558912	-0.384392	0.117729	0.307048	0.797222	-0.296473	0.0100748	0.438537	0.0519333	-0.444042	0.89444	0.231168	0.764963	-0.0538372	0.0163257	0.890588	0.5893	-0.243473	0.0949452	0.527854	-0.368834	-0.406232	0.32867	0.277956	0.742895	-0.382848	0.0218309	0.309161	-0.562532	-0.330746	0.11486	0.384649	0.595564	0.154587	0.0906151	0.691283	-0.00795509	-0.0879721	0.983795	0.821936	-0.382962	-0.179468	0.309004
CL4811.Contig5_DB	1	turquoise	0.558045	0.802353	0.118423	0.00926	0.550821	0.744249	0.124299	0.0214623	0.611612	0.567361	0.0800812	0.111097	0.136042	0.841801	0.727096	0.00442579	0.569814	0.0621596	0.109214	0.873776	0.566836	0.496846	0.111502	0.173617	-0.428532	0.791937	0.249805	0.0109632	0.493847	0.700643	0.176639	0.0355266	-0.535994	0.60517	0.136891	0.0842133	0.570214	-0.225521	0.108909	0.559601	0.124455	0.160076	0.749713	0.680779	-0.435579	0.301187	0.241241
CL7567.Contig1_DB	1	turquoise	0.834227	0.823034	0.00517234	0.00642635	0.733888	0.69783	0.0243903	0.036597	0.836248	0.790031	0.00496526	0.0112961	0.0100557	0.883777	0.979516	0.00157014	0.79993	-0.124287	0.00963902	0.750042	0.779808	0.811894	0.0131984	0.00786566	-0.642181	0.874866	0.0621993	0.00201513	0.429903	0.601683	0.248126	0.0865041	-0.753736	0.697255	0.0189939	0.0368179	0.748094	-0.404923	0.0204377	0.279658	0.0187591	0.0339196	0.961795	0.930966	-0.632041	0.0937008	0.0678192
CL9093.Contig1_DB	1	turquoise	0.964571	-0.700688	2.66226e-05	0.0355099	0.354606	-0.806133	0.349083	0.00868913	0.920395	0.205419	0.000433237	0.595961	-0.459798	-0.634824	0.213037	0.066246	0.952154	-0.715666	7.52669e-05	0.0301556	0.394762	0.221837	0.293049	0.566202	-0.110151	-0.580653	0.777858	0.101128	0.229687	-0.863475	0.552171	0.002702	-0.434153	0.0634621	0.242961	0.871149	0.360488	-0.559224	0.340571	0.11748	-0.519609	-0.720962	0.151647	0.028397	-0.0933338	-0.851997	0.811237
CL28700.Contig1_DB	1	turquoise	0.619527	0.981314	0.0751795	2.88336e-06	-0.125506	0.980782	0.747654	3.17968e-06	0.52505	0.253637	0.146649	0.5102	-0.676948	0.966366	0.0451963	2.22314e-05	0.604396	0.522319	0.0847187	0.149145	-0.107569	0.387475	0.782965	0.302851	0.320095	0.954868	0.401051	6.1519e-05	-0.221025	0.955487	0.567661	5.86524e-05	0.0305268	0.201832	0.93786	0.602534	-0.135183	0.243944	0.728767	0.52703	-0.734913	0.636743	0.0240896	0.0651753	0.337565	0.681291	0.374317
CL4965.Contig4_DB	1	turquoise	-0.61637	0.680494	0.0771114	0.0436531	0.223929	0.584525	0.562451	0.0983296	-0.576971	0.499953	0.103832	0.170517	0.722632	0.703076	0.0278569	0.0346177	-0.653324	0.122957	0.0563726	0.752648	0.187186	0.764122	0.629627	0.0165163	-0.205394	0.769113	0.596008	0.0154064	-0.104018	0.489653	0.789998	0.180916	-0.147931	0.265935	0.704079	0.489162	0.198941	-0.0849725	0.60785	0.827934	0.800861	0.298014	0.00949217	0.436046	-0.198777	0.166111	0.608153
CL22852.Contig2_DB	1	turquoise	0.524742	-0.719593	0.146929	0.0288451	0.548649	-0.616783	0.126098	0.0768574	0.441503	-0.54515	0.234165	0.12903	0.0557393	-0.776767	0.886742	0.013803	0.444998	0.0158749	0.230045	0.967667	0.574432	-0.648007	0.105723	0.059108	0.0758044	-0.773876	0.84631	0.0143947	-0.0454667	-0.541488	0.907535	0.132141	-0.628684	-0.362978	0.0697471	0.336997	0.542517	0.256461	0.131262	0.505338	0.0330292	-0.101383	0.932775	0.795225	0.0756417	-0.128364	0.846637
CL29192.Contig1_DB	1	turquoise	0.753735	0.911724	0.0189942	0.000616749	0.47027	0.84554	0.201435	0.00408609	0.796313	0.525628	0.010224	0.146124	-0.0994472	0.91981	0.79907	0.00044423	0.782174	0.213297	0.0127404	0.581613	0.513938	0.618108	0.15696	0.076044	-0.26783	0.918281	0.485953	0.000473855	0.66506	0.784742	0.0506238	0.0122554	-0.498688	0.45802	0.171775	0.215042	0.505449	-0.0521588	0.165112	0.893984	-0.164483	0.3616	0.67238	0.338973	-0.274742	0.403575	0.474322
CL824.Contig3_DB	1	turquoise	0.978844	0.569254	4.44183e-06	0.109642	0.410242	0.675797	0.272777	0.0457046	0.969708	-0.240661	1.54638e-05	0.53278	-0.387256	0.514667	0.303147	0.156271	0.986824	0.655807	8.53432e-07	0.0551235	0.449299	-0.248434	0.225028	0.519206	-0.240234	0.47177	0.533529	0.199803	0.408911	0.742745	0.27449	0.021872	-0.465138	-0.0973268	0.207076	0.803286	0.426727	0.521722	0.252024	0.149694	-0.443985	0.653734	0.231235	0.0561651	-0.227825	0.755793	0.555487
CL7441.Contig2_DB	1	turquoise	0.77381	0.896232	0.0144085	0.00106932	0.58605	0.805995	0.0972409	0.00870958	0.866046	0.655629	0.00253468	0.0552127	0.0848318	0.945219	0.828215	0.000120053	0.832637	0.0731771	0.0053393	0.851589	0.594043	0.70043	0.0916551	0.035607	-0.118698	0.934092	0.761011	0.000226814	0.841239	0.726741	0.00447852	0.0265564	-0.590899	0.565487	0.0938282	0.112548	0.609341	-0.2273	0.0815232	0.556424	-0.0144775	0.218464	0.970512	0.572272	-0.116168	0.268643	0.765989
CL8820.Contig3_DB	1	turquoise	0.781849	0.698419	0.0128026	0.0363712	0.838241	0.797187	0.00476674	0.0100805	0.811008	-0.18209	0.00798866	0.639147	0.200843	0.606185	0.604352	0.0835538	0.755297	0.732284	0.0186067	0.0248659	0.859669	-0.181197	0.00296336	0.64082	-0.553	0.559776	0.122508	0.117041	0.511174	0.865004	0.159588	0.00260159	-0.837979	-0.00175257	0.00479256	0.99643	0.842294	0.566079	0.00437998	0.112088	0.19936	0.752475	0.607079	0.0193104	-0.536024	0.880687	0.136864
CL1670.Contig3_DB	1	turquoise	0.676951	-0.749801	0.0451952	0.0199934	-0.0378319	-0.679185	0.923021	0.044219	0.701258	-0.49161	0.0352956	0.178913	-0.519799	-0.750784	0.15147	0.0197406	0.745805	-0.118869	0.0210436	0.760675	-0.00916047	-0.579441	0.98134	0.102013	0.11115	-0.757191	0.775885	0.018144	0.468603	-0.621736	0.203258	0.073846	-0.00721247	-0.43354	0.985308	0.243703	-0.00456568	0.0879811	0.990699	0.821919	-0.618461	-0.257971	0.0758284	0.502746	0.106765	-0.288568	0.784556
CL11784.Contig2_DB	1	turquoise	-0.611459	0.918072	0.0801778	0.000478021	0.156775	0.893137	0.687089	0.0011815	-0.612371	0.41339	0.0796029	0.268747	0.642995	0.931715	0.0617615	0.000256149	-0.659363	0.311892	0.0533655	0.413898	0.123322	0.406359	0.751933	0.277791	0.0146537	0.89528	0.970153	0.001103	-0.271272	0.867479	0.480146	0.0024446	-0.112566	0.434082	0.773091	0.243047	0.141808	0.0205931	0.715908	0.958063	0.709192	0.414198	0.0323999	0.267718	-0.00249746	0.520154	0.994912
Unigene38313_DB	1	turquoise	0.786409	0.868582	0.0119474	0.00237683	0.0318867	0.773771	0.935096	0.0144167	0.74256	0.621712	0.0219228	0.0738603	-0.639814	0.90114	0.0634836	0.000906998	0.793686	0.0960033	0.0106636	0.80592	0.0606504	0.712892	0.876822	0.0311044	-0.0698862	0.897055	0.858207	0.00104079	0.053258	0.696944	0.89176	0.036938	-0.0985858	0.50903	0.800782	0.161644	0.0293256	-0.200561	0.940301	0.604869	-0.687729	0.241606	0.0406108	0.531123	-0.0452532	0.27781	0.907968
CL7798.Contig3_DB	1	turquoise	-0.512066	0.92353	0.158737	0.000377589	-0.253829	0.961886	0.509868	3.42859e-05	-0.487015	0.0466374	0.183636	0.905163	0.23127	0.881067	0.549358	0.00169737	-0.487709	0.681423	0.182918	0.0432547	-0.277275	0.20672	0.470089	0.593583	0.542565	0.878141	0.131221	0.00184261	0.0327487	0.964951	0.933344	2.56445e-05	0.262816	0.0136224	0.494464	0.972253	-0.251901	0.44837	0.513198	0.226106	0.188458	0.775954	0.627258	0.0139677	0.530826	0.79737	0.14145
CL21757.Contig2_DB	1	turquoise	0.502388	0.738971	0.16811	0.0229229	0.346372	0.826038	0.361169	0.00607147	0.5633	-0.161836	0.114256	0.677421	-0.0197129	0.656463	0.959854	0.0547965	0.542095	0.787463	0.131622	0.0117553	0.392428	0.0510419	0.296171	0.896244	-0.4032	0.672658	0.281905	0.0471097	0.650041	0.842418	0.0580517	0.00436844	-0.344366	-0.143915	0.364145	0.711832	0.396232	0.634195	0.291092	0.0665999	-0.0519348	0.870078	0.894437	0.00228695	-0.427463	0.845162	0.251118
CL798.Contig1_DB	1	turquoise	0.703562	0.865626	0.0344383	0.0025615	0.904188	0.904582	0.000815354	0.000803999	0.757663	0.0889723	0.0180299	0.819938	0.357895	0.836144	0.34431	0.0049758	0.687459	0.607363	0.0407216	0.0827922	0.924784	0.150451	0.000356808	0.699227	-0.557505	0.809688	0.118856	0.00817434	0.634372	0.917413	0.0664999	0.000491286	-0.894532	0.121389	0.00112998	0.755724	0.915461	0.353231	0.000532089	0.351088	0.347647	0.677681	0.359285	0.0448748	-0.549284	0.744937	0.12557
Unigene1338_DB	1	turquoise	0.852918	-0.74451	0.00346896	0.0213916	0.286138	-0.851721	0.455406	0.00356443	0.849759	0.197419	0.0037247	0.610655	-0.389167	-0.65701	0.30056	0.0545246	0.875542	-0.791514	0.00197862	0.0110365	0.332653	0.180061	0.381747	0.64295	-0.08421	-0.616501	0.829459	0.0770309	0.474132	-0.915164	0.197248	0.000538508	-0.344103	0.0334838	0.364536	0.931851	0.320939	-0.616216	0.39974	0.0772065	-0.4627	-0.81769	0.209786	0.00709213	-0.0917805	-0.924865	0.814334
CL19900.Contig2_DB	1	turquoise	0.883255	0.994032	0.00159411	5.37644e-08	0.621485	0.959828	0.0739968	4.11331e-05	0.83158	0.421962	0.00545222	0.257934	-0.130121	0.995047	0.738632	2.80165e-08	0.838742	0.39038	0.00471777	0.298923	0.655809	0.543679	0.0551228	0.130274	-0.111218	0.990868	0.77575	2.37497e-07	0.192013	0.913715	0.620654	0.000570554	-0.700153	0.361934	0.0357119	0.338493	0.626642	0.0918435	0.0709369	0.814208	-0.175623	0.531453	0.651293	0.140892	-0.11024	0.566691	0.777683
CL6261.Contig1_DB	1	turquoise	0.401601	0.925054	0.284001	0.00035243	-0.130967	0.878943	0.736981	0.001802	0.393067	0.436157	0.295314	0.240546	-0.453573	0.946957	0.220103	0.000107427	0.438605	0.290454	0.237613	0.448327	-0.0915542	0.524346	0.814785	0.14729	-0.0189514	0.939528	0.961404	0.000168719	0.224576	0.83452	0.561292	0.00514193	0.0915907	0.360288	0.814712	0.340858	-0.0950322	0.0115322	0.807853	0.976509	-0.497698	0.418861	0.172764	0.261819	-0.0329023	0.460201	0.933032
CL16143.Contig1_DB	1	turquoise	0.81195	0.645485	0.00785792	0.0604339	0.393842	0.537502	0.294277	0.135577	0.815368	0.509718	0.00739554	0.160983	-0.216522	0.684729	0.575776	0.0418552	0.832404	0.0181754	0.00536397	0.962984	0.42584	0.801869	0.253118	0.00933488	0.10328	0.739805	0.791461	0.0226879	0.485064	0.428136	0.185662	0.250291	-0.463722	0.222964	0.208647	0.56418	0.416788	-0.174709	0.264433	0.653016	-0.3199	0.18262	0.401354	0.638153	0.0980877	0.0775622	0.801773
Unigene34132_DB	1	turquoise	0.942841	0.73672	0.000138977	0.0235654	0.545096	0.760956	0.129075	0.0172472	0.966899	0.107463	2.10339e-05	0.783174	-0.195012	0.697477	0.6151	0.0367324	0.958052	0.497403	4.77739e-05	0.173059	0.57449	0.235437	0.105679	0.541977	-0.334657	0.707675	0.378706	0.0329412	0.548038	0.765664	0.126607	0.0161679	-0.573063	0.128529	0.10675	0.741742	0.562485	0.316882	0.114896	0.40606	-0.245243	0.600207	0.524762	0.0874847	-0.322729	0.608301	0.396965
CL2279.Contig1_DB	1	turquoise	0.848156	0.880185	0.00385936	0.00174028	0.64687	0.776739	0.0597033	0.0138086	0.860211	0.696731	0.00292511	0.0370207	-0.0600258	0.926959	0.878083	0.000322677	0.829434	0.0241285	0.00568662	0.95087	0.674768	0.774557	0.0461623	0.0142539	-0.476165	0.934315	0.195064	0.000224185	0.450638	0.687471	0.223479	0.0407168	-0.662378	0.588449	0.051903	0.0955435	0.647805	-0.250732	0.0592133	0.515222	-0.0728579	0.192501	0.85223	0.61975	-0.447625	0.212744	0.226974
CL14194.Contig2_DB	1	turquoise	0.803415	0.837445	0.0090971	0.00484541	0.341439	0.914616	0.368506	0.000550487	0.841273	-0.0914617	0.00447528	0.81497	-0.304976	0.766304	0.42487	0.0160247	0.833064	0.734328	0.00529402	0.0242609	0.385818	-0.0242065	0.305103	0.950711	-0.495101	0.732288	0.175372	0.0248647	0.608118	0.949803	0.0823064	8.88244e-05	-0.343986	-0.0103402	0.36471	0.978937	0.37277	0.538333	0.323129	0.134856	-0.327762	0.784234	0.389212	0.0123503	-0.482832	0.879497	0.187996
CL3038.Contig1_DB	1	turquoise	0.794159	0.651371	0.0105836	0.0573679	0.258916	0.696102	0.501125	0.0372644	0.729804	0.0638287	0.0256131	0.87041	-0.441188	0.642046	0.234538	0.062272	0.767896	0.396502	0.0156724	0.290732	0.293444	-0.0315741	0.443452	0.935731	-0.106073	0.568726	0.785926	0.110047	-0.0225228	0.726372	0.954136	0.0266713	-0.342819	0.182474	0.366447	0.638427	0.254781	0.189865	0.508227	0.624643	-0.480718	0.402692	0.190221	0.28257	-0.0941028	0.575024	0.809704
CL14833.Contig2_DB	1	turquoise	-0.516786	-0.759765	0.154279	0.0175278	-0.671496	-0.623586	0.0476364	0.0727399	-0.505309	-0.7379	0.165249	0.0232272	-0.206477	-0.817787	0.594027	0.00707971	-0.465039	0.106963	0.207186	0.784164	-0.703685	-0.889231	0.0343926	0.00133437	0.391995	-0.837529	0.296752	0.00483702	-0.325457	-0.516485	0.392754	0.154561	0.68384	-0.54451	0.0422284	0.12957	-0.683472	0.379873	0.0423839	0.313252	-0.223289	-0.0619222	0.563598	0.874256	0.388063	-0.0484643	0.302054
CL4545.Contig1_DB	1	turquoise	0.737988	0.826311	0.023202	0.00603995	-0.00627831	0.883967	0.98721	0.00156149	0.641784	-0.0701154	0.0624134	0.857746	-0.688156	0.781585	0.0404353	0.0128533	0.709865	0.7278	0.0321617	0.0262278	0.0261897	0.124309	0.946677	0.749999	0.0269357	0.78317	0.94516	0.0125509	-0.208679	0.884731	0.590009	0.00152695	-0.0843118	-0.134967	0.829256	0.729188	-0.0146443	0.521062	0.970172	0.150302	-0.718763	0.801428	0.029119	0.00940357	0.0469362	0.793263	0.904558
CL14233.Contig1_DB	1	turquoise	0.886884	0.867833	0.00143259	0.00242271	0.129728	0.890621	0.739399	0.00127848	0.863354	0.130846	0.00271004	0.737217	-0.620677	0.831569	0.0744834	0.00545347	0.901729	0.613497	0.000888757	0.0788964	0.177717	0.278848	0.647351	0.467469	-0.226665	0.851587	0.557558	0.0035752	0.296594	0.878673	0.438341	0.00181556	-0.185258	0.0987007	0.633223	0.800554	0.147958	0.396019	0.704026	0.291374	-0.666022	0.730991	0.0501702	0.0252538	-0.209953	0.698851	0.587689
CL9194.Contig1_DB	1	turquoise	0.791916	0.975154	0.0109669	7.76945e-06	0.262592	0.930986	0.494845	0.000265651	0.850907	0.453691	0.00363031	0.219968	-0.308447	0.985726	0.419347	1.12833e-06	0.854773	0.331696	0.00332457	0.383202	0.294612	0.5833	0.441555	0.0992099	-0.183436	0.987457	0.636628	7.18813e-07	0.705628	0.872692	0.033681	0.00213559	-0.281621	0.367446	0.462864	0.330634	0.294604	0.0505095	0.441568	0.897321	-0.390994	0.479565	0.298097	0.191441	-0.176387	0.502978	0.649853
CL5429.Contig3_DB	1	turquoise	0.760052	0.25901	0.0174598	0.500965	0.644601	0.306785	0.0609031	0.421988	0.795122	-0.134254	0.0104217	0.730575	0.122653	0.209708	0.753245	0.588134	0.778576	0.279363	0.0134411	0.466612	0.648561	-0.188043	0.0588193	0.628032	0.132996	0.184177	0.733026	0.635242	0.555546	0.346049	0.120437	0.361648	-0.696964	-0.0321646	0.0369303	0.934531	0.650208	0.281532	0.0579659	0.463012	0.00977371	0.275599	0.980091	0.472887	0.134574	0.359957	0.729953
CL24582.Contig2_DB	1	turquoise	0.945777	0.812426	0.000115891	0.00779228	0.241586	0.894114	0.531157	0.00114525	0.913749	-0.0994963	0.000569807	0.798973	-0.563655	0.748648	0.113977	0.0202928	0.948527	0.705302	9.68533e-05	0.0337996	0.290253	-0.0692934	0.448657	0.8594	-0.24667	0.703102	0.522276	0.0346082	0.286519	0.934293	0.454778	0.000224438	-0.304761	0.00192328	0.425214	0.996082	0.257681	0.512888	0.503242	0.157955	-0.608206	0.741291	0.0822502	0.0222731	-0.230178	0.860913	0.551299
CL17700.Contig1_DB	1	turquoise	0.872845	0.915469	0.00212696	0.000531932	0.477958	0.845942	0.193149	0.00405071	0.877227	0.549528	0.00188968	0.125368	-0.200456	0.931205	0.605062	0.000262774	0.879249	0.207588	0.00178666	0.591998	0.486375	0.650545	0.184299	0.0577923	-0.091095	0.920583	0.815701	0.000429756	0.357956	0.78511	0.344221	0.0121869	-0.52186	0.47837	0.149567	0.192709	0.471542	-0.102523	0.200051	0.792964	-0.26718	0.348801	0.487052	0.357584	-0.0651046	0.401875	0.867838
CL10936.Contig1_DB	1	turquoise	0.90964	0.918329	0.000667849	0.000472912	0.597742	0.88408	0.0891379	0.00155634	0.911196	0.458738	0.000629433	0.214231	-0.174632	0.928148	0.65316	0.000305025	0.893901	0.249172	0.00115309	0.517926	0.644286	0.437648	0.0610707	0.238756	-0.56284	0.886702	0.114617	0.00144039	0.435197	0.84935	0.2417	0.0037588	-0.623525	0.487702	0.0727767	0.182925	0.617046	-0.0249199	0.0766954	0.94926	-0.181436	0.356507	0.640371	0.34632	-0.555054	0.484905	0.120835
Unigene33191_DB	1	turquoise	0.887687	0.851175	0.00139842	0.00360852	0.517356	0.912	0.153745	0.000610205	0.909531	-0.104566	0.000670581	0.788912	-0.148706	0.789911	0.702585	0.0113173	0.911286	0.769674	0.00062726	0.0152849	0.548048	0.143843	0.126599	0.711971	-0.08885	0.802112	0.820183	0.00929731	0.576862	0.915407	0.103913	0.000533253	-0.567276	-0.179059	0.111162	0.644831	0.544285	0.579627	0.129761	0.101877	-0.235129	0.857012	0.542521	0.00315587	-0.0949458	0.837808	0.808025
CL15498.Contig1_DB	1	turquoise	-0.725091	0.589508	0.0270737	0.0947994	-0.379595	0.630876	0.313635	0.0684841	-0.626258	0.00838919	0.0711619	0.982911	0.317052	0.535365	0.405794	0.137441	-0.654666	0.52723	0.0556957	0.144674	-0.419989	0.104486	0.260402	0.78907	0.167861	0.569769	0.665965	0.109248	0.183713	0.643872	0.636109	0.0612919	0.470992	0.0542213	0.200649	0.889811	-0.368214	0.425336	0.329546	0.253742	0.324407	0.623982	0.394372	0.072505	0.156345	0.570742	0.687914
Unigene33034_DB	1	turquoise	0.955188	0.705097	6.00247e-05	0.0338744	0.46377	0.608659	0.208594	0.0819594	0.92774	0.702967	0.000311002	0.0346581	-0.339697	0.762273	0.371113	0.0169405	0.939012	-0.115103	0.000173726	0.768087	0.497572	0.630618	0.17289	0.0686321	-0.229672	0.724381	0.552198	0.0272981	0.282382	0.541779	0.461603	0.131892	-0.524781	0.706905	0.146893	0.0332181	0.463167	-0.401226	0.209265	0.284492	-0.385868	-0.00389588	0.305035	0.992063	-0.204926	0.108507	0.596863
CL6153.Contig1_DB	1	turquoise	0.831883	0.968543	0.00541964	1.7627e-05	0.630509	0.962905	0.0686946	3.12154e-05	0.888087	0.26783	0.00138166	0.485953	0.0243456	0.960716	0.950428	3.80695e-05	0.86228	0.501312	0.00278225	0.169171	0.6597	0.41929	0.0532005	0.261279	-0.290002	0.956923	0.449066	5.23693e-05	0.713571	0.928733	0.0308703	0.000296592	-0.649109	0.190634	0.0585345	0.623214	0.663091	0.228271	0.051561	0.554692	-0.0426306	0.621711	0.913285	0.0738608	-0.299817	0.64567	0.433139
Unigene1274_DB	1	turquoise	0.484729	0.635438	0.186012	0.0659025	-0.263388	0.514396	0.49349	0.156527	0.443551	0.56537	0.231746	0.112639	-0.652418	0.695936	0.056833	0.0373288	0.517998	-0.0838931	0.153146	0.830094	-0.231131	0.773928	0.549605	0.014384	0.325394	0.714601	0.392851	0.0305178	0.0546678	0.419395	0.888909	0.261147	0.179521	0.310881	0.643963	0.415493	-0.248141	-0.320706	0.519717	0.400101	-0.742274	0.0486865	0.0220014	0.901012	0.324934	0.0241709	0.39356
CL1183.Contig2_DB	1	turquoise	0.908525	-0.92302	0.000696345	0.000386274	0.350911	-0.84537	0.354482	0.00410112	0.898245	-0.583158	0.00100051	0.099312	-0.422056	-0.952493	0.257817	7.34423e-05	0.911343	-0.14199	0.000625894	0.715557	0.405735	-0.643189	0.278602	0.0616575	-0.430514	-0.931035	0.24738	0.000265007	0.424939	-0.781583	0.254233	0.0128538	-0.388283	-0.509669	0.301756	0.16103	0.380483	0.159254	0.31241	0.68235	-0.4437	-0.276294	0.23157	0.471726	-0.423526	-0.357112	0.255986
CL22865.Contig1_DB	1	turquoise	-0.749501	0.940038	0.0200712	0.000163874	-0.462152	0.962286	0.210397	3.30572e-05	-0.661218	0.134721	0.0524627	0.729666	0.257306	0.897991	0.503885	0.001009	-0.678295	0.619085	0.0446061	0.0754481	-0.514744	0.281208	0.156199	0.463549	0.307545	0.88127	0.420779	0.0016876	0.0714736	0.959755	0.855014	4.13913e-05	0.541467	0.118212	0.132159	0.761967	-0.467688	0.346847	0.204262	0.360467	0.250213	0.714633	0.516121	0.0305068	0.311018	0.770456	0.415277
CL5594.Contig4_DB	1	turquoise	0.570404	0.785234	0.108764	0.0121641	0.206871	0.832691	0.593308	0.00533355	0.534567	0.0146582	0.138141	0.970144	-0.241874	0.762303	0.530654	0.0169336	0.571895	0.608061	0.107632	0.0823429	0.231332	0.106878	0.549248	0.784331	0.191581	0.742873	0.621455	0.0218369	0.106191	0.84053	0.785692	0.00454555	-0.288599	0.00654275	0.451364	0.986672	0.220584	0.382938	0.568454	0.309037	-0.320252	0.666033	0.400806	0.0501646	0.175216	0.705003	0.65206
CL16895.Contig2_DB	1	turquoise	0.977483	0.663227	5.51771e-06	0.0514957	0.54035	0.766479	0.133117	0.0159857	0.952622	-0.210909	7.27585e-05	0.58595	-0.25646	0.601653	0.505339	0.0865235	0.964384	0.673436	2.7111e-05	0.0467588	0.574284	-0.252782	0.105834	0.511676	-0.096173	0.536664	0.805582	0.136306	0.359935	0.829643	0.341367	0.00566356	-0.613349	-0.0594766	0.078989	0.879192	0.547911	0.519289	0.126713	0.151944	-0.326854	0.664014	0.390606	0.0511202	-0.0840689	0.819555	0.829742
CL24290.Contig1_DB	1	turquoise	-0.97112	0.757232	1.3103e-05	0.0181342	-0.562864	0.824772	0.114598	0.00621934	-0.973691	-0.177376	9.47894e-06	0.647993	0.211478	0.699575	0.584915	0.0359307	-0.971945	0.792376	1.18493e-05	0.0108875	-0.592444	0.0433437	0.0927567	0.911839	0.220915	0.714539	0.567859	0.0305388	-0.463736	0.850394	0.208631	0.00367235	0.610532	-0.242478	0.0807651	0.529595	-0.573947	0.604168	0.106086	0.0848679	0.271411	0.856613	0.479913	0.00318549	0.208033	0.817398	0.591186
Unigene42713_DB	1	turquoise	0.87662	0.910113	0.00192138	0.000656002	0.186326	0.951266	0.63123	8.02055e-05	0.830721	0.104589	0.00554528	0.788866	-0.55694	0.872641	0.119311	0.00213845	0.87778	0.639489	0.00186109	0.0636617	0.236268	0.183451	0.540511	0.636599	-0.078157	0.855167	0.841588	0.0032944	0.240472	0.955571	0.533111	5.82715e-05	-0.262494	0.137093	0.495013	0.725053	0.211136	0.392052	0.585536	0.296675	-0.612819	0.727051	0.0793216	0.0264599	-0.0773275	0.778641	0.843253
CL14103.Contig3_DB	1	turquoise	0.808631	-0.636017	0.0083252	0.0655792	0.363524	-0.521756	0.336217	0.149663	0.865623	-0.716861	0.0025617	0.0297527	-0.261102	-0.72722	0.497387	0.0264072	0.851121	0.238933	0.00361296	0.535816	0.397307	-0.68062	0.289665	0.0435992	-0.490998	-0.701997	0.179538	0.0350189	0.651736	-0.434179	0.0571809	0.24293	-0.358054	-0.629612	0.34408	0.069211	0.38955	0.484024	0.300043	0.186747	-0.293353	0.126245	0.4436	0.746206	-0.474745	0.0468975	0.196587
Unigene5033_DB	1	turquoise	0.301069	0.802528	0.431127	0.00923307	-0.206361	0.86283	0.59424	0.00274512	0.308357	-0.0953795	0.41949	0.807161	-0.393108	0.739841	0.295259	0.0226778	0.351347	0.750862	0.353843	0.0197207	-0.210202	0.130099	0.587236	0.738674	0.349025	0.765678	0.357254	0.0161648	0.230148	0.872458	0.551351	0.00214885	0.183331	-0.142099	0.636825	0.715344	-0.198234	0.582882	0.609153	0.0995114	-0.466849	0.846869	0.205186	0.0039698	0.365796	0.800988	0.332978
CL19955.Contig3_DB	1	turquoise	0.40964	0.780979	0.273551	0.0129703	0.282057	0.767265	0.462141	0.0158113	0.39747	0.228867	0.289448	0.55363	-0.0600028	0.781899	0.87813	0.0127929	0.403805	0.397273	0.281115	0.289709	0.330128	0.338769	0.385591	0.372507	-0.117282	0.771738	0.763797	0.0148433	0.287373	0.733607	0.453375	0.0244734	-0.325875	0.134846	0.392111	0.729423	0.322609	0.157453	0.397151	0.685792	-0.0909819	0.481846	0.815927	0.189031	-0.151868	0.503599	0.696502
CL11378.Contig3_DB	1	turquoise	-0.832135	0.990686	0.00539269	2.54439e-07	-0.822288	0.948979	0.0065166	9.39525e-05	-0.874449	0.442538	0.00203787	0.23294	-0.187994	0.995099	0.628123	2.70026e-08	-0.827251	0.356399	0.00593209	0.346477	-0.845399	0.566446	0.00409859	0.111804	0.351399	0.991615	0.353766	1.76329e-07	-0.647409	0.897272	0.0594207	0.00103336	0.836726	0.368565	0.00491722	0.329049	-0.838779	0.0648342	0.0047141	0.868383	-0.143331	0.499944	0.71296	0.170526	0.348821	0.536063	0.357555
CL14415.Contig3_DB	1	turquoise	0.88724	0.900954	0.00141739	0.000912838	0.304562	0.820826	0.425531	0.00669612	0.864536	0.546274	0.00263203	0.128084	-0.398074	0.925982	0.288648	0.000337707	0.898581	0.212649	0.000989304	0.582788	0.335633	0.758741	0.377231	0.0177712	0.0717673	0.959881	0.854423	4.09451e-05	0.354495	0.731649	0.349244	0.025056	-0.375617	0.368598	0.319152	0.329003	0.322928	-0.0572102	0.396657	0.88377	-0.481695	0.389622	0.18919	0.299946	0.0756301	0.337611	0.84666
CL16197.Contig2_DB	1	turquoise	0.893026	0.758016	0.00118566	0.017945	0.212054	0.848454	0.583869	0.00383403	0.894248	-0.187591	0.00114032	0.628873	-0.501605	0.679397	0.168882	0.0441269	0.923071	0.78388	0.000385407	0.0124168	0.251989	-0.117137	0.513046	0.764082	-0.177854	0.641844	0.647095	0.0623811	0.417393	0.903039	0.263668	0.000849113	-0.260242	-0.0975497	0.498856	0.802843	0.236145	0.583519	0.540727	0.0990518	-0.564538	0.808619	0.113287	0.00832687	-0.171097	0.899992	0.659835
CL8817.Contig2_DB	1	turquoise	0.830676	0.902935	0.00555018	0.000852199	0.327218	0.896632	0.390047	0.0010554	0.810848	0.311386	0.00801098	0.414695	-0.346886	0.881668	0.36041	0.00166856	0.834372	0.393826	0.00515727	0.294299	0.360873	0.299919	0.340017	0.432976	-0.0541369	0.841522	0.889982	0.00445188	0.371825	0.894222	0.324456	0.00114129	-0.381575	0.380871	0.310908	0.311876	0.346834	0.133401	0.360486	0.732236	-0.405629	0.486062	0.27874	0.184624	-0.0458052	0.614039	0.906849
CL14666.Contig1_DB	1	turquoise	0.510248	0.882192	0.160474	0.00164371	0.425925	0.800498	0.253014	0.00954932	0.554033	0.540977	0.121665	0.132578	-0.00337761	0.925222	0.993119	0.000349742	0.51135	0.157791	0.15942	0.685145	0.445032	0.664928	0.230005	0.0506861	-0.630014	0.925224	0.0689789	0.000349698	0.367157	0.726695	0.331044	0.0265705	-0.40337	0.38557	0.281683	0.30544	0.421257	-0.132296	0.258814	0.73439	0.0156092	0.295138	0.968208	0.4407	-0.598439	0.311938	0.0886689
CL8607.Contig1_DB	1	turquoise	0.784018	0.753851	0.0123909	0.0189652	0.533211	0.787826	0.139335	0.0116897	0.790746	0.129718	0.0111705	0.739418	-0.0857678	0.721137	0.826343	0.02834	0.78335	0.45892	0.0125168	0.214025	0.568731	0.0428622	0.110043	0.912815	-0.159519	0.655272	0.681842	0.0553915	0.53453	0.821079	0.138174	0.00666476	-0.569333	0.273399	0.109582	0.476573	0.561563	0.218428	0.115623	0.572336	-0.137501	0.491064	0.724261	0.179471	-0.162642	0.658692	0.675885
CL23493.Contig1_DB	1	turquoise	0.976337	0.695678	6.55737e-06	0.0374294	0.511146	0.682848	0.159615	0.0426476	0.990956	0.394964	2.29584e-07	0.292779	-0.259165	0.712539	0.5007	0.0312266	0.990271	0.134233	2.96251e-07	0.730616	0.543539	0.279491	0.130393	0.4664	-0.241855	0.664864	0.530685	0.0507164	0.541817	0.654174	0.131859	0.0559432	-0.553207	0.497991	0.122339	0.172471	0.525925	-0.0559911	0.145853	0.886233	-0.324069	0.211696	0.394894	0.58452	-0.225096	0.350358	0.560362
CL29437.Contig2_DB	1	turquoise	0.805284	0.758548	0.00881514	0.0178174	0.237344	0.686085	0.538613	0.0412896	0.76761	0.409055	0.0157354	0.274304	-0.480189	0.785957	0.19078	0.0120303	0.792704	0.181795	0.0108312	0.639699	0.287332	0.648195	0.453443	0.0590098	-0.354189	0.818291	0.349691	0.00701511	0.246177	0.598816	0.523133	0.0884157	-0.278178	0.173785	0.468584	0.654757	0.25834	-0.0259583	0.502111	0.947148	-0.485653	0.324831	0.185049	0.393719	-0.340327	0.266807	0.370169
CL7357.Contig2_DB	1	turquoise	0.898168	0.721558	0.00100306	0.0282034	0.58714	0.67542	0.0964674	0.045872	0.946268	0.342903	0.000112319	0.366322	-0.0678425	0.704073	0.862321	0.0342497	0.929671	0.260844	0.000283423	0.497828	0.611325	0.474508	0.0802627	0.196843	-0.125846	0.726844	0.746987	0.0265242	0.712052	0.633105	0.0313954	0.0672149	-0.621487	0.268441	0.0739952	0.48492	0.607149	0.0805247	0.0829304	0.83684	-0.16049	0.392548	0.679989	0.29601	-0.117744	0.377266	0.762888
CL10837.Contig1_DB	1	turquoise	-0.840967	0.936398	0.00450411	0.000200686	-0.146244	0.946034	0.707333	0.000114015	-0.821146	0.232514	0.00665653	0.54715	0.533368	0.922915	0.139196	0.000388088	-0.859484	0.485032	0.00297647	0.185695	-0.174223	0.291571	0.65393	0.446503	-0.0184421	0.890273	0.962441	0.00129233	-0.2714	0.930225	0.47993	0.000275838	0.212779	0.231827	0.582554	0.548369	-0.147942	0.222845	0.704059	0.564393	0.611407	0.575102	0.0802107	0.105222	-0.0450442	0.667815	0.908392
CL25344.Contig1_DB	1	turquoise	-0.384321	0.6286	0.307144	0.069796	0.0518937	0.584175	0.89452	0.098581	-0.29939	0.29115	0.433828	0.447191	0.493468	0.674473	0.177023	0.046294	-0.333596	0.180982	0.380314	0.641223	0.0339522	0.384895	0.930899	0.306361	0.309661	0.663782	0.417423	0.0512309	0.381857	0.542295	0.31052	0.131451	-0.0217206	0.141561	0.955769	0.716387	0.0780024	-0.0470934	0.841898	0.904239	0.437987	0.24917	0.23835	0.517929	0.271305	0.263393	0.480091
CL24812.Contig2_DB	1	turquoise	0.983153	0.559735	2.01036e-06	0.117073	0.613777	0.564473	0.0787217	0.113337	0.968209	0.11866	1.82849e-05	0.761086	-0.18975	0.553799	0.624856	0.121856	0.967494	0.327939	1.97509e-05	0.38894	0.648907	0.287173	0.0586392	0.453704	-0.205152	0.585442	0.596449	0.0976743	0.406265	0.54329	0.277913	0.130604	-0.676323	0.050728	0.0454718	0.896879	0.621609	0.204983	0.0739219	0.596759	-0.249427	0.42946	0.517483	0.248668	-0.191978	0.377601	0.620718
CL20769.Contig1_DB	1	turquoise	0.694583	0.529168	0.0378575	0.14293	-0.124515	0.372227	0.749596	0.323891	0.621225	0.862747	0.0741528	0.0027507	-0.735655	0.636206	0.0238735	0.065474	0.695168	-0.395805	0.0376283	0.291659	-0.0874974	0.867558	0.822885	0.00243973	0.154382	0.654571	0.691675	0.0557435	-0.0706292	0.24653	0.856712	0.522518	0.0300178	0.70494	0.938894	0.0339318	-0.123278	-0.610798	0.752018	0.0805966	-0.799808	-0.24258	0.00965834	0.529415	0.16912	-0.265093	0.663577
Unigene4802_DB	1	turquoise	-0.699179	0.951904	0.0360811	7.66381e-05	0.132116	0.9498	0.734739	8.88431e-05	-0.627477	0.325207	0.0704484	0.393139	0.727035	0.940421	0.0264646	0.000160303	-0.706851	0.419374	0.0332376	0.261174	0.100805	0.353916	0.796374	0.350087	-0.25805	0.902088	0.502609	0.000877772	0.046135	0.931314	0.906181	0.000261344	-0.0371224	0.362946	0.924462	0.337043	0.125435	0.138145	0.747792	0.723011	0.801937	0.520095	0.00932438	0.151196	-0.26507	0.635224	0.49063
CL24277.Contig1_DB	1	turquoise	0.895784	0.805855	0.00108507	0.00873027	0.785839	0.857608	0.0120522	0.0031119	0.893747	0.0605828	0.00115875	0.876959	0.0388365	0.769563	0.920982	0.015309	0.863223	0.533834	0.00271878	0.138785	0.821047	0.00114167	0.00666874	0.997674	-0.434774	0.709763	0.242211	0.032198	0.454374	0.891181	0.219186	0.00125642	-0.818893	0.19012	0.00693836	0.624167	0.797108	0.321058	0.0100934	0.399554	0.0192694	0.571465	0.960757	0.107958	-0.425337	0.729403	0.25374
Unigene36957_DB	1	turquoise	0.859518	0.874854	0.0029741	0.00201574	0.427134	0.926577	0.251523	0.000328503	0.784958	-0.0113139	0.0122152	0.976954	-0.372587	0.817446	0.323386	0.00712368	0.803859	0.717214	0.00902962	0.0296345	0.475849	0.125421	0.195402	0.74782	-0.335543	0.798886	0.377367	0.00980552	0.0669074	0.945425	0.864205	0.000118506	-0.494002	-0.00202395	0.176482	0.995877	0.428748	0.471645	0.24954	0.199939	-0.371352	0.78749	0.32512	0.0117504	-0.314484	0.838573	0.409817
CL17652.Contig1_DB	1	turquoise	0.634418	0.971849	0.066474	1.19907e-05	-0.180515	0.965312	0.642099	2.47418e-05	0.560304	0.270726	0.11662	0.481066	-0.742871	0.943907	0.0218375	0.000130254	0.637358	0.532985	0.0648341	0.139535	-0.152645	0.460596	0.695009	0.21214	0.146115	0.954761	0.707582	6.20245e-05	-0.155768	0.933562	0.689018	0.000233129	0.0922552	0.207547	0.813387	0.592074	-0.185907	0.264138	0.632012	0.492215	-0.7983	0.672517	0.00989971	0.0471732	0.164831	0.674084	0.671719
CL7410.Contig2_DB	1	turquoise	0.892896	0.516939	0.00119053	0.154135	0.794934	0.485696	0.0104533	0.185004	0.937634	0.364197	0.000187593	0.335256	0.126623	0.525777	0.745468	0.145988	0.898286	0.106287	0.000999136	0.785501	0.809899	0.302042	0.00814445	0.429565	-0.273925	0.489999	0.47569	0.180561	0.650734	0.469934	0.0576948	0.201802	-0.817195	0.43451	0.00715614	0.24253	0.802375	-0.119304	0.00925664	0.75982	0.0625516	0.164956	0.872986	0.671482	-0.259188	0.256855	0.500659
CL17089.Contig3_DB	1	turquoise	0.627884	0.682765	0.0702116	0.042683	0.3392	0.598582	0.371859	0.0885725	0.703234	0.443512	0.0345594	0.231792	-0.0839961	0.719736	0.829887	0.0287978	0.687494	0.135545	0.0407073	0.728063	0.371431	0.695279	0.325009	0.0375852	-0.166955	0.751802	0.667683	0.019481	0.771645	0.508598	0.0148631	0.16206	-0.348381	0.19482	0.358203	0.615456	0.377629	-0.112067	0.316356	0.774075	-0.165271	0.270054	0.670883	0.482197	-0.173265	0.196533	0.655739
CL18464.Contig1_DB	1	turquoise	0.7638	-0.790133	0.0165897	0.0112783	0.190013	-0.673123	0.624367	0.0468998	0.72965	-0.755328	0.02566	0.0185991	-0.478558	-0.853347	0.192509	0.00343524	0.757738	0.122426	0.0180119	0.75369	0.245015	-0.718494	0.525161	0.0292079	-0.19403	-0.823898	0.616917	0.00632295	0.287958	-0.593458	0.452414	0.092057	-0.247863	-0.697948	0.520199	0.0365517	0.211723	0.416555	0.58447	0.264727	-0.51451	-0.00677822	0.156419	0.986192	-0.183565	-0.105265	0.636387
CL16937.Contig1_DB	1	turquoise	0.920925	0.880349	0.00042346	0.00173226	0.327294	0.848446	0.38993	0.00383473	0.864342	0.441046	0.0026447	0.234707	-0.454599	0.896919	0.218929	0.00104548	0.900154	0.235481	0.000938142	0.541899	0.357432	0.388254	0.344981	0.301795	0.00488154	0.843718	0.990056	0.00424932	0.144091	0.822607	0.711492	0.00647793	-0.410229	0.481887	0.272794	0.188988	0.323214	-0.051064	0.396214	0.896199	-0.515723	0.322912	0.155276	0.396682	0.0291515	0.469459	0.940655
CL7526.Contig2_DB	1	turquoise	0.867598	0.668214	0.00243725	0.0491456	0.278713	0.637565	0.467693	0.0647198	0.855526	0.312974	0.00326716	0.412193	-0.384053	0.704268	0.307511	0.0341782	0.889501	0.240217	0.0013234	0.533559	0.295638	0.439497	0.43989	0.236549	0.158095	0.731559	0.684565	0.025083	0.344111	0.57953	0.364523	0.101948	-0.347439	0.183155	0.359592	0.637154	0.287024	0.0558823	0.453949	0.886453	-0.481712	0.356971	0.189172	0.345648	0.169541	0.295507	0.66278
CL18240.Contig1_DB	1	turquoise	0.932694	-0.68463	0.000243756	0.0418967	0.637153	-0.552799	0.0649478	0.122672	0.939321	-0.783508	0.000170713	0.0124869	-0.103903	-0.742264	0.790225	0.0220041	0.930531	0.227875	0.000271706	0.555399	0.674428	-0.774129	0.0463142	0.0143424	-0.265524	-0.725105	0.48986	0.0270693	0.497489	-0.470693	0.172973	0.200974	-0.68752	-0.728929	0.0406966	0.0258804	0.657899	0.490311	0.0540851	0.180241	-0.162781	0.0885758	0.675621	0.82073	-0.267957	0.00386137	0.485738
Unigene31929_DB	1	turquoise	-0.233666	0.903564	0.54511	0.000833546	0.00949803	0.949848	0.980652	8.85448e-05	-0.160157	0.0756783	0.680626	0.846563	0.240886	0.853996	0.532385	0.00338455	-0.195071	0.618008	0.614991	0.0761053	0.0271439	0.141317	0.944737	0.71686	-0.274717	0.820778	0.474363	0.00670206	0.406162	0.963357	0.278047	2.99188e-05	0.0476346	0.13862	0.903143	0.722089	0.0518605	0.389355	0.894587	0.300307	0.261821	0.694561	0.49616	0.0378663	-0.303497	0.796632	0.427234
Unigene3144_DB	1	turquoise	0.765671	0.839409	0.0161664	0.00465301	0.112872	0.80653	0.772486	0.00863053	0.748826	0.27376	0.0202464	0.475967	-0.514626	0.852812	0.15631	0.00347733	0.789063	0.375295	0.0114677	0.319601	0.166359	0.461514	0.668815	0.21111	-0.0799864	0.853024	0.837919	0.00346062	0.368874	0.758445	0.328612	0.017842	-0.176378	0.104268	0.649871	0.789502	0.147403	0.114073	0.705097	0.770118	-0.580237	0.478436	0.101431	0.192639	-0.0853108	0.479157	0.827257
CL10856.Contig3_DB	1	turquoise	0.866725	0.914733	0.00249175	0.000547898	0.308693	0.9115	0.418957	0.000622109	0.836612	0.195435	0.00492859	0.614319	-0.461413	0.896084	0.211224	0.00107453	0.852281	0.552817	0.00351953	0.122658	0.356684	0.389002	0.346064	0.300784	-0.484161	0.914653	0.186604	0.000549666	0.240832	0.88612	0.532479	0.00146561	-0.342027	0.0909629	0.367628	0.815965	0.324802	0.305918	0.393763	0.423369	-0.456379	0.676679	0.216901	0.0453151	-0.4678	0.647814	0.204139
CL9250.Contig1_DB	1	turquoise	0.713806	0.860827	0.0307896	0.00288204	0.056127	0.935182	0.885959	0.000214177	0.603828	-0.0690985	0.0850905	0.859793	-0.66883	0.805035	0.04886	0.00885241	0.660841	0.7389	0.0526452	0.0229432	0.114095	0.00747623	0.770073	0.98477	-0.318833	0.774898	0.403014	0.0141837	-0.213794	0.964571	0.580713	2.66221e-05	-0.131253	-0.0124247	0.736422	0.974692	0.0630561	0.52163	0.871968	0.149778	-0.642905	0.792733	0.0618098	0.0108261	-0.305896	0.869679	0.423403
CL27338.Contig2_DB	1	turquoise	0.848112	0.824901	0.00386306	0.00620415	0.56982	0.838506	0.10921	0.00474079	0.854079	0.146486	0.00337814	0.706866	-0.109372	0.805927	0.779398	0.00871957	0.84404	0.463892	0.00422017	0.208458	0.589582	0.17689	0.0947477	0.648907	-0.314887	0.756287	0.409185	0.0183639	0.365157	0.842098	0.333887	0.00439813	-0.600712	0.154208	0.0871481	0.692008	0.576242	0.213406	0.104373	0.581415	-0.143611	0.514443	0.71242	0.156482	-0.304683	0.638593	0.425339
CL12479.Contig2_DB	1	turquoise	0.810965	0.804822	0.0079947	0.00888436	0.802254	0.870271	0.00927534	0.0022755	0.798598	-0.0674033	0.00985182	0.863206	0.112511	0.744654	0.773199	0.0213527	0.763479	0.674641	0.0166631	0.046219	0.827894	-0.0387548	0.0058591	0.921148	-0.407914	0.69634	0.275778	0.0371721	0.352112	0.914323	0.352722	0.000556946	-0.830971	0.0183312	0.00551813	0.962666	0.803074	0.457704	0.00914929	0.215399	0.106583	0.706234	0.784916	0.0334609	-0.392423	0.830064	0.296177
CL1873.Contig4_DB	1	turquoise	0.93901	0.724167	0.000173741	0.0273663	0.285292	0.629985	0.456798	0.0689961	0.869674	0.513916	0.002311	0.156981	-0.550936	0.759335	0.124203	0.0176297	0.910119	0.136066	0.000655847	0.727049	0.336736	0.737188	0.375566	0.0234308	-0.186718	0.81364	0.6305	0.00762691	0.11167	0.544752	0.774858	0.129365	-0.368537	0.296034	0.329089	0.439248	0.293837	-0.101883	0.442813	0.794234	-0.585418	0.301903	0.0976915	0.429788	-0.171691	0.191399	0.658713
CL3504.Contig3_DB	1	turquoise	0.590561	0.976935	0.0940633	5.99961e-06	-0.128478	0.94816	0.741841	9.92612e-05	0.567346	0.386766	0.111108	0.303813	-0.612227	0.982154	0.0796936	2.45693e-06	0.625842	0.382866	0.0714062	0.309136	-0.0791748	0.508702	0.839547	0.16196	0.0458373	0.971072	0.906784	1.31795e-05	0.257205	0.904656	0.504058	0.000801875	0.0669837	0.320267	0.864051	0.400783	-0.0916976	0.0934736	0.814499	0.810958	-0.676664	0.512451	0.0453217	0.158371	0.0361791	0.56217	0.926377
CL13043.Contig2_DB	1	turquoise	0.88514	0.930343	0.00150872	0.000274239	0.316261	0.877209	0.407032	0.00189059	0.850091	0.517178	0.00369726	0.153911	-0.413834	0.95751	0.268181	4.99396e-05	0.881843	0.22967	0.00166022	0.552201	0.342126	0.583094	0.36748	0.0993582	-0.0623858	0.938896	0.87332	0.000174863	0.177126	0.821972	0.648463	0.00655519	-0.38891	0.466755	0.300907	0.205289	0.315541	-0.0750384	0.40816	0.847848	-0.476304	0.361	0.194915	0.339834	-0.0450301	0.427626	0.90842
Unigene40785_DB	1	turquoise	-0.295593	0.499759	0.439963	0.17071	-0.531022	0.370274	0.141275	0.326638	-0.209191	0.572695	0.589076	0.107028	-0.16704	0.558536	0.667521	0.11803	-0.189135	-0.116334	0.625999	0.765663	-0.54201	0.809717	0.131695	0.00817028	0.329588	0.617139	0.386416	0.0766384	0.343512	0.253559	0.365415	0.510334	0.564474	0.279243	0.113337	0.466811	-0.502964	-0.30189	0.167544	0.429808	-0.233421	0.0353661	0.545543	0.928028	0.316689	-0.0929218	0.406362
CL15380.Contig1_DB	1	turquoise	0.857153	0.805031	0.00314544	0.00885299	0.168881	0.869989	0.66403	0.00229225	0.871632	-0.0294731	0.00219611	0.940001	-0.518984	0.755791	0.152227	0.0184854	0.896599	0.69647	0.00105654	0.0371217	0.210902	0.0467381	0.585962	0.904959	-0.324439	0.73661	0.394323	0.0235972	0.444976	0.898793	0.230071	0.0009823	-0.2004	0.0309933	0.605165	0.936912	0.196381	0.470468	0.61257	0.201219	-0.565127	0.757058	0.112828	0.0181764	-0.315672	0.805128	0.407955
Unigene34560_DB	1	turquoise	0.873868	0.556528	0.00206981	0.119643	0.432499	0.447149	0.244965	0.227528	0.828548	0.491109	0.00578536	0.179425	-0.285015	0.620723	0.457255	0.0744557	0.854085	-0.0215294	0.00337766	0.956158	0.460384	0.747995	0.212378	0.0204638	0.0735836	0.681077	0.850772	0.0434027	0.23793	0.337284	0.537582	0.374739	-0.510097	0.178746	0.160619	0.645419	0.441148	-0.202471	0.234586	0.601362	-0.353113	0.126242	0.35126	0.746214	0.0784935	-0.0112998	0.840913
CL14556.Contig1_DB	1	turquoise	0.743269	0.877292	0.0217287	0.0018863	0.915262	0.826622	0.000536393	0.00600411	0.768878	0.395986	0.0154575	0.291418	0.349647	0.872837	0.356339	0.00212739	0.715252	0.350885	0.0302962	0.35452	0.921394	0.626473	0.00041492	0.0710353	-0.233153	0.911701	0.546018	0.000617299	0.476933	0.76771	0.194242	0.0157132	-0.940389	0.256345	0.000160593	0.505536	0.911485	0.103089	0.000622466	0.791841	0.304316	0.516209	0.425925	0.154819	-0.225469	0.456754	0.559694
CL9001.Contig2_DB	1	turquoise	0.417292	-0.755404	0.263796	0.0185804	0.12098	-0.732689	0.756528	0.0247453	0.308005	-0.304215	0.420049	0.426086	-0.325263	-0.728146	0.393052	0.0261208	0.35451	-0.280216	0.349222	0.465194	0.166914	-0.334121	0.667762	0.379518	0.0407295	-0.690349	0.917141	0.0395436	-0.244972	-0.723522	0.525236	0.0275716	-0.211858	-0.344269	0.584225	0.36429	0.128089	-0.047249	0.742601	0.903924	-0.331575	-0.362436	0.383386	0.337774	0.0315637	-0.487955	0.935752
CL209.Contig12_DB	1	turquoise	0.842535	0.84199	0.00435764	0.00440815	0.206245	0.9192	0.594452	0.00045588	0.755792	-0.0683478	0.0184852	0.861304	-0.56936	0.773543	0.109561	0.0144641	0.804374	0.734426	0.00895172	0.0242322	0.260204	-0.0222621	0.498921	0.954667	-0.161404	0.745623	0.678246	0.0210924	-0.0238532	0.956524	0.95143	5.40648e-05	-0.292856	0.0320305	0.444409	0.934804	0.218471	0.538974	0.572259	0.134302	-0.58964	0.792152	0.0947072	0.0109261	-0.15901	0.874578	0.682816
Unigene39502_DB	1	turquoise	0.933711	0.652657	0.000231343	0.0567114	0.397242	0.574485	0.289751	0.105683	0.873481	0.411538	0.00209131	0.271114	-0.405686	0.679615	0.278665	0.0440324	0.903622	0.108031	0.00083185	0.782049	0.430541	0.648574	0.247347	0.0588121	-0.0648337	0.724979	0.868384	0.0271089	0.122756	0.482197	0.753043	0.188662	-0.4821	0.176969	0.188764	0.648759	0.392379	-0.0557592	0.296236	0.886702	-0.458849	0.254507	0.214105	0.508699	-0.0429207	0.170402	0.912697
CL19366.Contig2_DB	1	turquoise	-0.72492	-0.906446	0.0271276	0.000751766	-0.0471129	-0.912433	0.9042	0.000600022	-0.644578	-0.165556	0.0609155	0.670341	0.635602	-0.86232	0.0658105	0.00277952	-0.694111	-0.582699	0.0380432	0.0996433	-0.0841213	-0.376881	0.829637	0.317394	0.164055	-0.86941	0.673196	0.00232679	0.142467	-0.897555	0.714633	0.00102375	0.117622	-0.105046	0.763128	0.787961	-0.0381871	-0.323992	0.9223	0.395013	0.644548	-0.70087	0.060931	0.0354414	0.137954	-0.707545	0.723381
CL10005.Contig2_DB	1	turquoise	0.78778	0.927372	0.0116981	0.000316475	0.169941	0.9369	0.662023	0.000195291	0.771917	0.284356	0.0148053	0.458342	-0.458387	0.91034	0.214626	0.000650354	0.808321	0.443303	0.00836984	0.232038	0.188622	0.289508	0.626953	0.449875	-0.044826	0.873233	0.908834	0.00210517	0.202172	0.930716	0.601911	0.000269231	-0.225487	0.355176	0.559661	0.348253	0.173447	0.180189	0.655396	0.642709	-0.52108	0.539431	0.150286	0.133908	-0.0290939	0.654588	0.940772
CL13946.Contig1_DB	1	turquoise	0.923695	0.815933	0.000374804	0.00732094	0.500829	0.879006	0.169649	0.00179879	0.925007	0.0342152	0.000353187	0.930365	-0.279517	0.768754	0.466356	0.0154846	0.917704	0.608814	0.000485399	0.0818602	0.547653	0.0274991	0.126929	0.944015	-0.510516	0.732238	0.160218	0.0248797	0.449059	0.912846	0.225306	0.00059042	-0.5277	0.167283	0.14425	0.66706	0.52104	0.401009	0.150323	0.284777	-0.293703	0.669111	0.443031	0.0487302	-0.497839	0.775974	0.172623
Unigene42184_DB	1	turquoise	0.305953	0.912843	0.423312	0.000590486	-0.16222	0.970232	0.676689	1.45562e-05	0.251039	0.0394851	0.51469	0.919666	-0.451478	0.862756	0.222509	0.00275006	0.303313	0.686656	0.427529	0.041053	-0.116953	0.121077	0.764445	0.756338	0.147815	0.837099	0.704303	0.00487989	0.00693207	0.984773	0.985879	1.41327e-06	0.102896	0.0955015	0.792223	0.806919	-0.130019	0.449589	0.738831	0.224692	-0.482699	0.764299	0.188135	0.016476	0.123527	0.838775	0.75153
CL22509.Contig2_DB	1	turquoise	0.895196	0.67507	0.001106	0.0460275	0.185859	0.78215	0.632101	0.0127449	0.883602	-0.241052	0.00157816	0.532094	-0.538109	0.60079	0.13505	0.0870965	0.919964	0.812199	0.000441314	0.00782347	0.227311	-0.151966	0.556405	0.696314	-0.0969857	0.598738	0.803964	0.0884675	0.388338	0.831684	0.301682	0.00544103	-0.247003	-0.154617	0.521696	0.691224	0.205456	0.670401	0.595894	0.0481366	-0.610081	0.854822	0.0810519	0.00332079	-0.0828061	0.859595	0.83227
CL921.Contig2_DB	1	turquoise	0.637825	-0.776671	0.0645763	0.0138224	-0.14958	-0.758564	0.700902	0.0178134	0.569513	-0.218936	0.109444	0.571421	-0.780962	-0.744566	0.0129736	0.0213765	0.626659	-0.47365	0.0709266	0.197768	-0.0938607	-0.471026	0.810187	0.200612	-0.374395	-0.798408	0.320857	0.0098824	-0.051138	-0.71546	0.896049	0.0302253	0.104748	-0.0915813	0.788551	0.814731	-0.135391	-0.282799	0.728361	0.460914	-0.758943	-0.623407	0.0177231	0.0728466	-0.353099	-0.521752	0.351279
CL1906.Contig1_DB	1	turquoise	0.344511	0.839715	0.363929	0.00462351	-0.0369795	0.872114	0.924752	0.00216845	0.391472	0.145673	0.297454	0.708435	-0.168772	0.822411	0.664238	0.0065017	0.420751	0.480374	0.259447	0.190584	-0.0565626	0.136111	0.885078	0.726962	0.646688	0.772227	0.0597989	0.0147399	0.417277	0.886151	0.263815	0.00146424	-0.0081125	0.222885	0.983474	0.564323	-0.0341109	0.238749	0.930577	0.536138	-0.320266	0.538091	0.400784	0.135067	0.652826	0.671639	0.0566256
Unigene35192_DB	1	turquoise	0.766063	0.89138	0.0160785	0.00124868	0.633587	0.947138	0.0669425	0.000106173	0.793792	0.0237675	0.0106456	0.951604	0.0817292	0.845389	0.834427	0.00409944	0.779511	0.66024	0.0132566	0.0529377	0.651753	0.0762475	0.0571724	0.84542	-0.0243993	0.804673	0.950319	0.0089067	0.540668	0.971307	0.132843	1.28112e-05	-0.681349	0.0867276	0.0432865	0.824424	0.652628	0.417689	0.056726	0.263294	-0.00685573	0.718234	0.986034	0.0292942	-0.0350526	0.825571	0.928665
Unigene628_DB	1	turquoise	0.891475	0.900392	0.00124495	0.000930545	0.510682	0.893673	0.160059	0.00116152	0.907261	0.234488	0.000729672	0.543656	-0.203416	0.900521	0.599628	0.000926453	0.899738	0.488568	0.000951492	0.182032	0.546438	0.389846	0.127946	0.299643	-0.356819	0.90336	0.345868	0.000839586	0.519484	0.8609	0.151763	0.00287701	-0.535336	0.132047	0.137466	0.734875	0.535059	0.226961	0.137709	0.557028	-0.239549	0.599116	0.534732	0.088214	-0.352451	0.59737	0.352226
CL22265.Contig1_DB	1	turquoise	-0.750144	0.824623	0.0199051	0.00623697	-0.505647	0.853267	0.164919	0.00344152	-0.700965	0.0968587	0.0354057	0.804217	0.126925	0.803789	0.744876	0.0090402	-0.713539	0.582945	0.0308815	0.0994661	-0.542992	0.235375	0.130858	0.542088	-0.0417801	0.815151	0.91501	0.00742433	-0.191717	0.836695	0.621204	0.00492029	0.593572	0.0436242	0.0919783	0.91127	-0.513096	0.377581	0.157758	0.316422	0.191729	0.682191	0.62118	0.0429266	-0.037889	0.659153	0.922905
CL5922.Contig2_DB	1	turquoise	0.864178	0.847711	0.00265552	0.0038973	0.80538	0.758807	0.00880087	0.0177555	0.876452	0.569189	0.00193023	0.109692	0.128826	0.89158	0.74116	0.00124087	0.845419	0.138866	0.00409675	0.721611	0.830912	0.778572	0.00552453	0.0134419	-0.217484	0.92331	0.574039	0.000381316	0.547814	0.66601	0.126794	0.0501754	-0.843584	0.372601	0.00426153	0.323366	0.819881	-0.135974	0.00681378	0.727228	0.0753363	0.308424	0.84725	0.419384	-0.215725	0.255104	0.577217
Unigene36179_DB	1	turquoise	0.440523	0.899654	0.235327	0.000954204	0.63071	0.963908	0.0685796	2.8389e-05	0.564767	-0.0296122	0.113108	0.939719	0.378213	0.838934	0.315546	0.00469903	0.490293	0.729698	0.18026	0.0256456	0.638838	0.0791618	0.0640182	0.839573	-0.506492	0.81553	0.164098	0.007374	0.871448	0.988602	0.00220673	5.14779e-07	-0.570352	0.0164374	0.108804	0.966521	0.665169	0.505983	0.0505721	0.164592	0.357048	0.800921	0.345536	0.0094828	-0.514366	0.872935	0.156556
CL10655.Contig1_DB	1	turquoise	0.88165	0.94758	0.00166943	0.000103144	0.101065	0.963754	0.795856	2.88105e-05	0.827848	0.21324	0.00586425	0.581718	-0.665691	0.925117	0.0503259	0.000351422	0.881023	0.523714	0.00169951	0.147867	0.14654	0.28137	0.706762	0.463279	-0.159356	0.900288	0.682155	0.00093387	0.103435	0.951441	0.791154	7.92139e-05	-0.175354	0.224587	0.6518	0.561273	0.112812	0.271787	0.772605	0.47928	-0.706926	0.62188	0.0332107	0.0737591	-0.146488	0.701147	0.706862
CL16480.Contig3_DB	1	turquoise	-0.610441	0.885759	0.0808231	0.00148136	-0.380612	0.916105	0.312232	0.000518381	-0.562919	0.0649827	0.114555	0.868083	0.172028	0.82739	0.658076	0.00591617	-0.569662	0.663995	0.10933	0.0511292	-0.396442	0.252375	0.290812	0.512379	0.226212	0.837302	0.558367	0.00485963	0.0601898	0.910162	0.877752	0.000654763	0.434062	0.0276033	0.243071	0.943803	-0.358837	0.449472	0.342949	0.224828	0.180985	0.771863	0.641216	0.0148167	0.199881	0.769831	0.60612
CL2138.Contig4_DB	1	turquoise	0.890199	0.563666	0.00129527	0.113969	0.242001	0.47841	0.53043	0.192667	0.82938	0.431987	0.00569261	0.245586	-0.545507	0.619924	0.128728	0.0749386	0.867151	0.0526239	0.00246506	0.893043	0.280357	0.623476	0.46496	0.0728055	-0.19112	0.656165	0.622311	0.0549449	0.0841802	0.388092	0.829519	0.302014	-0.308464	0.185023	0.41932	0.633662	0.244033	-0.151216	0.526874	0.697756	-0.570588	0.171999	0.108624	0.65813	-0.169069	0.0793539	0.663675
CL9175.Contig1_DB	1	turquoise	0.729068	0.425783	0.0258376	0.253189	-0.0575747	0.265771	0.883033	0.48944	0.630932	0.832531	0.0684525	0.00535049	-0.764566	0.53237	0.0164155	0.140078	0.697993	-0.429177	0.0365343	0.249014	-0.0122442	0.875302	0.97506	0.00199152	-0.193518	0.567944	0.617864	0.110648	-0.21746	0.146157	0.574083	0.7075	-0.0183089	0.663751	0.962712	0.0512454	-0.0580133	-0.623938	0.882147	0.0725308	-0.761726	-0.273289	0.0170675	0.476757	-0.17376	-0.333839	0.654804
CL5666.Contig1_DB	1	turquoise	0.782792	0.898841	0.0126226	0.000980714	-0.0525837	0.884611	0.893124	0.00153237	0.705756	0.38482	0.0336342	0.306463	-0.764032	0.892595	0.0165369	0.00120193	0.775086	0.331993	0.0141451	0.382749	0.00362456	0.353185	0.992616	0.351155	-0.0560902	0.848347	0.886033	0.0038431	0.0235945	0.875274	0.951956	0.00199303	-0.0337467	0.467581	0.931317	0.204379	-0.0351456	0.0477318	0.928476	0.902946	-0.80304	0.428497	0.00915443	0.249848	-0.0467435	0.562989	0.904948
CL15255.Contig3_DB	1	turquoise	-0.571987	0.952618	0.107563	7.27811e-05	-0.148361	0.917029	0.703251	0.000499132	-0.466765	0.401311	0.205278	0.28438	0.476477	0.962684	0.19473	3.18641e-05	-0.503097	0.360621	0.167413	0.340378	-0.212089	0.504946	0.583806	0.165603	0.459357	0.958423	0.213533	4.63287e-05	0.285487	0.868841	0.456477	0.00236109	0.219132	0.321831	0.571067	0.398356	-0.154581	0.0855952	0.691295	0.826688	0.429957	0.4913	0.24806	0.17923	0.460546	0.521446	0.212196
Unigene38335_DB	1	turquoise	0.947782	0.954028	0.000101778	6.55665e-05	0.525034	0.967137	0.146663	2.05146e-05	0.953179	0.168765	6.98464e-05	0.66425	-0.232598	0.929908	0.547002	0.000280156	0.954686	0.576847	6.23811e-05	0.103924	0.56286	0.304416	0.114601	0.425765	-0.252458	0.914393	0.512235	0.000555409	0.512657	0.953645	0.158175	6.74755e-05	-0.572384	0.119763	0.107263	0.758918	0.544932	0.309728	0.129214	0.417316	-0.292033	0.674363	0.44575	0.0463432	-0.243209	0.723381	0.528316
Unigene34435_DB	1	turquoise	0.0494856	0.857814	0.899394	0.00309683	0.0419589	0.792308	0.914647	0.0108993	0.0357582	0.428485	0.927231	0.249862	-0.0428463	0.867044	0.912848	0.00247174	0.027978	0.303922	0.943041	0.426554	0.0532981	0.703649	0.891679	0.0344059	-0.145634	0.915389	0.708511	0.000533649	0.0735294	0.714149	0.85088	0.0306722	-0.0229209	0.224785	0.953326	0.560918	0.0476292	0.0532622	0.903154	0.891751	-0.00557688	0.475989	0.988639	0.195252	-0.131635	0.386739	0.735677
Unigene36317_DB	1	turquoise	0.575998	0.76631	0.104555	0.0160234	0.301176	0.868054	0.430955	0.00240909	0.650921	-0.22505	0.0575989	0.560443	-0.0902313	0.679932	0.817425	0.0438953	0.637488	0.865934	0.0647623	0.00254184	0.327554	-0.0880598	0.38953	0.821761	-0.315916	0.676494	0.407572	0.0453965	0.662508	0.914887	0.0518406	0.000544531	-0.297098	-0.158621	0.437527	0.683559	0.337802	0.692164	0.373961	0.0388152	-0.144465	0.919956	0.710768	0.000441464	-0.323739	0.933473	0.395404
CL2107.Contig2_DB	1	turquoise	0.75511	0.888448	0.0186528	0.0013666	0.621802	0.794714	0.073806	0.0104901	0.674255	0.577301	0.0463916	0.103588	-0.0948162	0.927013	0.808283	0.000321868	0.672946	0.136192	0.0469796	0.726804	0.664845	0.749392	0.0507258	0.0200993	-0.296039	0.941942	0.439241	0.000146651	0.0125472	0.710381	0.974442	0.0319799	-0.692201	0.396056	0.0388002	0.291325	0.618597	-0.147909	0.0757454	0.704121	-0.0876704	0.294481	0.822539	0.441767	-0.28578	0.285392	0.455994
CL17721.Contig2_DB	1	turquoise	0.873192	0.889094	0.00210747	0.00133997	0.312705	0.844931	0.412616	0.00414013	0.819602	0.362892	0.00684885	0.33712	-0.453973	0.888823	0.219645	0.00135111	0.852474	0.374438	0.0035042	0.320796	0.371484	0.586758	0.324935	0.0967384	-0.190754	0.923171	0.622991	0.000383697	0.234408	0.78039	0.543797	0.0130846	-0.389641	0.201567	0.29992	0.603021	0.336766	0.13708	0.37552	0.725079	-0.492866	0.530203	0.177635	0.142005	-0.190593	0.472885	0.623289
CL8451.Contig1_DB	1	turquoise	0.8841	0.703434	0.00155545	0.0344855	0.455551	0.810882	0.217844	0.0080063	0.865277	-0.262518	0.00258396	0.494971	-0.260096	0.616932	0.499106	0.0767653	0.879873	0.832191	0.00175565	0.00538669	0.490308	-0.142537	0.180244	0.714497	-0.0966317	0.614886	0.804669	0.0780306	0.313085	0.866447	0.412018	0.00250925	-0.529142	-0.176892	0.142954	0.648904	0.464191	0.695806	0.208126	0.0373797	-0.332292	0.879757	0.382295	0.00176137	-0.0913858	0.897183	0.815121
Unigene38795_DB	1	turquoise	-0.749623	0.430573	0.0200396	0.247308	-0.169707	0.362621	0.662465	0.337509	-0.648234	0.511118	0.0589894	0.159641	0.556236	0.47704	0.119878	0.194128	-0.694578	-0.0818041	0.0378596	0.834277	-0.217421	0.520025	0.574153	0.151261	0.146109	0.488979	0.707594	0.181609	0.17158	0.307293	0.658923	0.421179	0.261048	0.499203	0.497479	0.171263	-0.160796	-0.270913	0.679404	0.48075	0.567223	0.027619	0.111203	0.943771	0.124066	0.0150803	0.750474
Unigene25047_DB	1	turquoise	-0.683316	0.881096	0.0424496	0.00169597	-0.738264	0.807419	0.0231235	0.00850045	-0.650136	0.486931	0.0580031	0.183722	-0.144831	0.908727	0.710062	0.000691115	-0.622149	0.214947	0.0735983	0.578624	-0.758935	0.621278	0.0177249	0.0741213	0.192277	0.906659	0.620165	0.000745932	-0.243866	0.747242	0.527167	0.0206619	0.78142	0.345227	0.012885	0.362866	-0.731169	-0.0782856	0.0252002	0.84133	-0.129193	0.345118	0.740443	0.363028	0.174095	0.36847	0.654173
Unigene37363_DB	1	turquoise	0.909759	-0.846982	0.000664856	0.00395997	0.389752	-0.834563	0.299771	0.00513752	0.924923	-0.294891	0.000354548	0.441102	-0.303781	-0.818827	0.426779	0.00694671	0.938707	-0.373499	0.000176725	0.322108	0.414289	-0.322631	0.267602	0.397117	-0.0676683	-0.77864	0.862672	0.0134284	0.512265	-0.829607	0.158547	0.00566746	-0.439121	-0.341299	0.236997	0.368715	0.404454	-0.108907	0.280268	0.780318	-0.389403	-0.45902	0.300241	0.213913	-0.0531648	-0.584057	0.891948
CL5117.Contig3_DB	1	turquoise	0.928398	0.920784	0.000301402	0.000426039	0.552822	0.915717	0.122654	0.000526618	0.873331	0.297134	0.0020997	0.437469	-0.272794	0.921034	0.477588	0.000421464	0.880057	0.443461	0.00174659	0.231852	0.593135	0.381141	0.0922796	0.311505	-0.327545	0.911223	0.389545	0.000628778	0.149037	0.893192	0.701948	0.00117944	-0.619177	0.276337	0.0753926	0.471654	0.549252	0.174494	0.125597	0.65342	-0.289486	0.557452	0.44991	0.118899	-0.305454	0.598366	0.424108
Unigene37903_DB	1	turquoise	0.815551	0.934663	0.00737127	0.000220135	0.32187	0.935127	0.398295	0.000214809	0.84056	0.206827	0.00454273	0.593388	-0.35144	0.904264	0.353707	0.000813145	0.838518	0.542897	0.00473958	0.130938	0.374184	0.350932	0.321152	0.354451	-0.511643	0.891744	0.159141	0.00123454	0.563198	0.918611	0.114336	0.000467345	-0.333258	0.156624	0.380827	0.687379	0.356147	0.269886	0.346843	0.482481	-0.370094	0.646173	0.32689	0.0600703	-0.503189	0.692179	0.167323
CL10478.Contig1_DB	1	turquoise	0.838403	0.695676	0.00475093	0.0374302	0.245017	0.72534	0.525157	0.026995	0.849058	-0.00251655	0.00378319	0.994873	-0.409214	0.659477	0.2741	0.0533099	0.871167	0.537063	0.00222304	0.135959	0.287054	0.0724745	0.453899	0.853001	-0.0923213	0.631562	0.813255	0.0680923	0.53473	0.738341	0.137998	0.0231017	-0.291981	-0.024982	0.445835	0.949134	0.275524	0.338315	0.473013	0.373188	-0.485041	0.574167	0.185686	0.105921	-0.0876975	0.637029	0.822485
CL27041.Contig1_DB	1	turquoise	0.748879	0.907609	0.0202326	0.000720392	0.820887	0.930718	0.00668846	0.000269205	0.780823	0.165021	0.0130005	0.671358	0.21426	0.873898	0.579868	0.00206817	0.723765	0.536497	0.0274941	0.136452	0.844915	0.252722	0.00414156	0.511779	-0.489897	0.850914	0.180666	0.00362981	0.557745	0.931885	0.118664	0.000253967	-0.823563	0.195384	0.00636289	0.614413	0.825611	0.295057	0.00612106	0.440833	0.202873	0.631223	0.600624	0.0682859	-0.470607	0.713627	0.201068
CL24282.Contig1_DB	1	turquoise	0.719079	-0.938965	0.0290143	0.000174186	-0.0076635	-0.906374	0.984389	0.000753718	0.630941	-0.404333	0.0684473	0.280426	-0.674111	-0.932163	0.0464559	0.000250427	0.697478	-0.33712	0.0367321	0.374988	0.038847	-0.450763	0.920961	0.223334	-0.0696359	-0.90062	0.858711	0.000923322	-0.110485	-0.879887	0.777198	0.00175497	-0.0724001	-0.404455	0.853151	0.280267	0.00757966	-0.0448144	0.98456	0.908858	-0.692316	-0.448179	0.0387544	0.226329	-0.0710728	-0.552716	0.85582
CL5911.Contig1_DB	1	turquoise	0.901503	-0.600942	0.000895743	0.0869951	0.228897	-0.735843	0.553578	0.0238188	0.849072	0.439508	0.00378199	0.236535	-0.531869	-0.508955	0.140522	0.161716	0.894424	-0.90556	0.0011339	0.000776287	0.261409	0.316016	0.496862	0.407415	-0.0194375	-0.496684	0.960415	0.17378	0.117964	-0.801027	0.762454	0.00946614	-0.311691	0.379541	0.414215	0.31371	0.230447	-0.801852	0.55082	0.00933749	-0.593691	-0.908778	0.0918967	0.000689801	-0.00266688	-0.926612	0.994567
CL2748.Contig2_DB	1	turquoise	0.870036	0.92659	0.00228942	0.0003283	0.551808	0.842713	0.123486	0.00434122	0.90751	0.567696	0.000723018	0.110838	-0.143944	0.95881	0.711776	4.48513e-05	0.886277	0.175236	0.00145876	0.652022	0.595142	0.721626	0.0909027	0.0281814	-0.534924	0.9662	0.137827	2.26139e-05	0.63554	0.765011	0.0658451	0.0163149	-0.560371	0.418505	0.116567	0.262266	0.583176	-0.11802	0.0992992	0.762346	-0.168342	0.33185	0.665052	0.382968	-0.530313	0.342666	0.141907
Unigene39017_DB	1	turquoise	0.886067	0.901047	0.00146789	0.000909903	0.353948	0.878345	0.350041	0.00183219	0.865697	0.432914	0.00255696	0.24446	-0.368099	0.907575	0.32971	0.000721294	0.891141	0.2816	0.00125798	0.462899	0.392397	0.380636	0.296211	0.3122	-0.131898	0.858178	0.735164	0.00307038	0.297819	0.857539	0.436361	0.00311699	-0.424807	0.50362	0.254397	0.1669	0.368249	-0.00854035	0.329497	0.982603	-0.434664	0.376747	0.242343	0.31758	-0.128273	0.518007	0.742241
Unigene4010_DB	1	turquoise	0.610747	0.905268	0.0806288	0.000784493	0.348472	0.911459	0.358068	0.000623093	0.667002	0.1858	0.0497101	0.632211	-0.0574225	0.87395	0.883341	0.00206527	0.656092	0.560784	0.0549816	0.11624	0.353659	0.40897	0.350462	0.274414	-0.0352518	0.892834	0.92826	0.00119289	0.529074	0.887677	0.143015	0.00139885	-0.360937	0.112433	0.339924	0.773353	0.364507	0.315091	0.334813	0.408865	-0.134109	0.69236	0.730857	0.0387367	-0.0373878	0.672271	0.923923
CL10825.Contig1_DB	1	turquoise	0.68177	0.821658	0.0431062	0.00659357	0.035649	0.869683	0.927453	0.00231041	0.601986	0.0501149	0.0863034	0.89812	-0.650057	0.768858	0.0580436	0.015462	0.646671	0.590153	0.0598078	0.0943486	0.0975473	0.046674	0.802847	0.905089	-0.463634	0.715552	0.208744	0.0301941	-0.0526157	0.901735	0.893059	0.000888574	-0.0819144	0.157567	0.834056	0.685574	0.0549226	0.351933	0.888394	0.352985	-0.611026	0.633909	0.0804518	0.0667606	-0.4529	0.773982	0.220875
CL4544.Contig2_DB	1	turquoise	0.88676	-0.771951	0.00143789	0.0147983	0.55349	-0.712877	0.122108	0.0311096	0.913018	-0.562915	0.000586439	0.114558	-0.101124	-0.790403	0.795739	0.0112307	0.910485	-0.0749832	0.000646775	0.847959	0.580054	-0.514073	0.101565	0.156832	-0.0288486	-0.748793	0.941271	0.0202551	0.599595	-0.675748	0.0878935	0.0457263	-0.607388	-0.626074	0.0827764	0.0712699	0.574927	0.208574	0.105352	0.590201	-0.199916	-0.181783	0.606056	0.639722	-0.0306217	-0.313294	0.937667
Unigene32661_DB	1	turquoise	0.656179	0.787663	0.0549381	0.0117192	0.522186	0.761571	0.149268	0.0171035	0.710407	0.439412	0.0319707	0.23665	-0.0022983	0.813077	0.995318	0.0077033	0.671946	0.148148	0.0474321	0.703661	0.559531	0.335339	0.117236	0.377676	-0.686812	0.755828	0.0409886	0.0184762	0.54782	0.738272	0.126789	0.0231212	-0.503385	0.521481	0.16713	0.149916	0.553193	-0.0977278	0.12235	0.802488	0.00673388	0.22664	0.986282	0.557602	-0.69369	0.38714	0.0382092
CL4825.Contig2_DB	1	turquoise	0.650473	0.881945	0.057829	0.00165542	-0.178221	0.941212	0.646405	0.000153095	0.565886	-0.0342914	0.112238	0.930211	-0.787345	0.820569	0.0117768	0.00672796	0.640489	0.721364	0.0631157	0.0282662	-0.13638	0.108518	0.72644	0.781088	0.0434585	0.810863	0.911606	0.00800887	-0.109037	0.9568	0.780061	5.28849e-05	0.096047	-0.0218547	0.805833	0.955496	-0.177153	0.518908	0.648411	0.152298	-0.821686	0.802466	0.00659017	0.00924261	0.068445	0.844249	0.861108
CL18867.Contig1_DB	1	turquoise	0.2992	0.578474	0.434133	0.102723	-0.182976	0.712366	0.637489	0.0312867	0.284854	-0.355971	0.457521	0.347098	-0.377806	0.490112	0.31611	0.180445	0.339416	0.777581	0.371535	0.0136394	-0.16053	-0.405331	0.679913	0.279127	0.462322	0.429213	0.210207	0.24897	0.183988	0.801316	0.635595	0.00942098	0.113552	-0.154407	0.771146	0.691627	-0.159565	0.656565	0.681755	0.0547458	-0.481117	0.749592	0.189799	0.0200475	0.446931	0.892892	0.227782
CL24072.Contig1_DB	1	turquoise	0.68931	0.57822	0.0399646	0.10291	0.0913648	0.454716	0.815163	0.218796	0.653993	0.722777	0.0560343	0.0278103	-0.542087	0.666308	0.131629	0.0500357	0.686589	-0.233543	0.0410806	0.545327	0.163251	0.796531	0.674726	0.0101881	-0.396044	0.680894	0.291342	0.0434812	0.245363	0.349533	0.524553	0.356506	-0.139237	0.573706	0.720892	0.106267	0.130272	-0.466928	0.738337	0.205098	-0.5474	-0.089213	0.12714	0.819458	-0.403487	-0.104203	0.281531
Unigene2098_DB	1	turquoise	0.974414	0.846815	8.60404e-06	0.00397445	0.583043	0.755726	0.0993952	0.0185013	0.965353	0.575421	2.46395e-05	0.104984	-0.195593	0.883009	0.614026	0.00160549	0.968111	0.0992947	1.84812e-05	0.799373	0.613188	0.662119	0.0790902	0.0520276	-0.125352	0.876426	0.747955	0.00193161	0.421017	0.68304	0.259114	0.0425664	-0.647744	0.446569	0.0592455	0.228205	0.590313	-0.180217	0.0942367	0.642658	-0.268923	0.232701	0.484106	0.546819	-0.113154	0.271538	0.771929
CL21388.Contig1_DB	1	turquoise	0.756094	0.637566	0.0184112	0.0647191	0.711207	0.71373	0.0316902	0.030816	0.802915	-0.217744	0.00917363	0.573569	0.138806	0.552769	0.721727	0.122698	0.758311	0.786558	0.0178742	0.0119201	0.729609	0.0326986	0.0256724	0.933446	-0.294793	0.594643	0.441261	0.0912442	0.658977	0.742836	0.0535545	0.021847	-0.720218	-0.242873	0.0286399	0.528904	0.718922	0.658456	0.0290663	0.0538105	0.0900297	0.868532	0.817827	0.00237987	-0.273201	0.781855	0.476905
CL2638.Contig9_DB	1	turquoise	-0.677505	-0.254654	0.0449519	0.508447	-0.771812	-0.20329	0.0148277	0.59986	-0.755344	-0.314391	0.0185951	0.409964	-0.317211	-0.285244	0.405546	0.456878	-0.699254	0.204288	0.0360525	0.598031	-0.781179	-0.235279	0.0129316	0.542256	0.22492	-0.246578	0.560676	0.522435	-0.752979	-0.163453	0.0191837	0.674341	0.769554	-0.31265	0.0153109	0.412702	-0.792759	0.258651	0.0108218	0.50158	-0.252386	0.173627	0.512361	0.655055	0.231429	0.0556813	0.549075
CL13494.Contig2_DB	1	turquoise	0.723159	0.630575	0.0276876	0.0686567	0.148364	0.50699	0.703245	0.163615	0.622138	0.71365	0.0736045	0.0308432	-0.521503	0.707538	0.149896	0.0329906	0.677635	-0.226979	0.0448948	0.556997	0.185278	0.785514	0.633186	0.0121122	0.0747961	0.719218	0.848335	0.0289686	-0.126668	0.396365	0.74538	0.290915	-0.237821	0.557912	0.537772	0.11853	0.151368	-0.426597	0.697463	0.252184	-0.548839	-0.0772522	0.12594	0.843404	0.080947	-0.0716502	0.835994
Unigene37220_DB	1	turquoise	0.953307	0.646918	6.91898e-05	0.0596784	0.312367	0.516087	0.413147	0.154934	0.933275	0.758628	0.000236609	0.0177981	-0.464975	0.727182	0.207256	0.0264192	0.963993	-0.206967	2.81572e-05	0.593133	0.353162	0.867236	0.351188	0.00245974	-0.135818	0.747811	0.727533	0.020512	0.351438	0.404134	0.35371	0.280686	-0.377645	0.594994	0.316333	0.0910038	0.331788	-0.456535	0.383062	0.216725	-0.530015	-0.0445199	0.142173	0.909455	-0.129395	-0.0667261	0.740049
CL13418.Contig1_DB	1	turquoise	0.911635	0.81421	0.000618888	0.00755004	0.415013	0.837946	0.266682	0.00479585	0.937814	0.200879	0.000185744	0.604286	-0.309149	0.785014	0.418234	0.0122048	0.937712	0.449478	0.000186794	0.224821	0.45413	0.196161	0.219466	0.612978	-0.391871	0.740965	0.296917	0.0223637	0.528677	0.852251	0.143371	0.00352198	-0.446241	0.311726	0.228589	0.41416	0.435175	0.196505	0.241728	0.612342	-0.35916	0.521175	0.342484	0.150198	-0.37933	0.649021	0.314001
Unigene5889_DB	1	turquoise	-0.616716	0.817365	0.0768987	0.00713412	-0.45465	0.818727	0.218871	0.00695946	-0.594169	0.137825	0.0915685	0.723633	0.0799498	0.785317	0.837993	0.0121485	-0.583933	0.563864	0.0987547	0.113814	-0.481685	0.400755	0.189201	0.285112	0.149439	0.834545	0.701175	0.00513933	-0.284235	0.784838	0.458541	0.0122376	0.491736	0.00367862	0.178785	0.992506	-0.45329	0.369533	0.220427	0.327683	0.104041	0.702802	0.789952	0.0347193	0.123842	0.60509	0.750913
CL11412.Contig3_DB	1	turquoise	0.802527	0.839768	0.00923328	0.00461843	-0.0303307	0.812065	0.938258	0.00784197	0.740875	0.319159	0.0223886	0.402508	-0.746674	0.862446	0.0208123	0.00277101	0.802308	0.319197	0.009267	0.402447	0.0146071	0.410874	0.970248	0.271965	-0.156599	0.851519	0.687427	0.00358069	0.00827332	0.767205	0.983147	0.0158246	-0.0400717	0.216015	0.918476	0.576692	-0.0205304	0.0780768	0.958191	0.841749	-0.775886	0.419743	0.0139816	0.260711	-0.142096	0.452808	0.71535
CL22888.Contig2_DB	1	turquoise	0.882606	-0.75022	0.00162429	0.0198853	0.264278	-0.750188	0.491975	0.0198936	0.84093	-0.202043	0.00450761	0.602148	-0.488721	-0.729106	0.181874	0.0258262	0.876204	-0.369345	0.00194333	0.327947	0.315493	-0.163553	0.408234	0.674151	-0.149761	-0.674411	0.700555	0.0463218	0.222938	-0.767057	0.564226	0.0158575	-0.341625	-0.267608	0.368228	0.486329	0.282974	-0.125347	0.460625	0.747966	-0.541582	-0.414778	0.13206	0.26698	-0.148785	-0.560352	0.702434
CL9392.Contig1_DB	1	turquoise	-0.700567	0.737929	0.0355554	0.023219	-0.188853	0.74131	0.626524	0.0222677	-0.630541	0.232646	0.0686765	0.546916	0.38711	0.734331	0.303346	0.0242601	-0.681089	0.402905	0.0433977	0.282292	-0.19747	0.332448	0.610562	0.382058	-0.392987	0.730264	0.295422	0.0254734	0.017048	0.721177	0.965278	0.0283271	0.288327	0.219592	0.45181	0.57024	-0.172404	0.156926	0.657365	0.686802	0.477452	0.497974	0.193688	0.172488	-0.415339	0.512566	0.266268
CL19748.Contig1_DB	1	turquoise	0.737043	0.938525	0.0234725	0.000178543	0.62001	0.946978	0.0748867	0.000107281	0.757882	0.184092	0.0179773	0.635401	0.0438663	0.912436	0.910779	0.000599953	0.736726	0.590441	0.0235638	0.0941476	0.657483	0.351254	0.0542905	0.353979	-0.275692	0.919011	0.472733	0.000459553	0.565277	0.925868	0.112712	0.000339498	-0.650307	0.115934	0.0579147	0.766451	0.65007	0.33067	0.058037	0.384765	-0.00158899	0.706709	0.996763	0.033289	-0.284835	0.70314	0.457551
Unigene36377_DB	1	turquoise	0.749002	0.914008	0.0202005	0.000563969	0.350851	0.955157	0.35457	6.01678e-05	0.77976	0.120413	0.0132078	0.757641	-0.220222	0.871663	0.569105	0.00219432	0.778132	0.613524	0.0135293	0.0788795	0.382632	0.158788	0.309456	0.68324	-0.190829	0.835747	0.622851	0.00501609	0.492336	0.969415	0.178173	1.59896e-05	-0.388195	0.196292	0.301876	0.612736	0.366762	0.353557	0.331604	0.350611	-0.290217	0.689613	0.448716	0.0398415	-0.184162	0.789944	0.63527
CL7613.Contig2_DB	1	turquoise	0.906555	0.649496	0.000748767	0.0583339	0.331625	0.741999	0.383309	0.0220771	0.841437	-0.300182	0.00445992	0.432552	-0.480203	0.556812	0.190765	0.119414	0.873753	0.827844	0.00207617	0.00586469	0.380579	-0.068294	0.312278	0.861412	-0.267242	0.579925	0.486948	0.101659	0.116258	0.771985	0.765813	0.014791	-0.399746	-0.329228	0.286439	0.386967	0.344655	0.724429	0.363715	0.0272829	-0.495704	0.88555	0.174765	0.00149058	-0.258284	0.838439	0.502209
CL13191.Contig1_DB	1	turquoise	-0.461166	0.924205	0.2115	0.000366293	-0.135612	0.946295	0.727932	0.000112124	-0.39083	0.174719	0.298317	0.652996	0.273458	0.895145	0.476474	0.00110784	-0.427638	0.594359	0.250903	0.0914386	-0.131973	0.303264	0.735019	0.427607	-0.174827	0.894446	0.652793	0.00113309	0.208825	0.938542	0.589744	0.000178374	0.192283	0.170175	0.620152	0.661581	-0.117825	0.334683	0.762728	0.378668	0.295941	0.706427	0.439398	0.0333909	-0.188688	0.724672	0.626831
Unigene2260_DB	1	turquoise	0.810862	0.935757	0.00800903	0.000207722	0.194511	0.943605	0.616028	0.000132688	0.726673	0.237932	0.0265773	0.537577	-0.512916	0.927918	0.157929	0.00030839	0.781923	0.482992	0.0127884	0.187827	0.228361	0.307024	0.554532	0.421607	0.165726	0.902071	0.670018	0.000878299	-0.0369663	0.92697	0.924779	0.000322513	-0.301643	0.226668	0.430205	0.557553	0.190034	0.220543	0.624328	0.568528	-0.581617	0.578488	0.100426	0.102713	0.17875	0.654724	0.645411
Unigene24787_DB	1	turquoise	0.865595	0.943697	0.00256348	0.000131942	0.655947	0.95758	0.0550537	4.96583e-05	0.899808	0.229008	0.000949217	0.553379	-0.0216798	0.924841	0.955851	0.000355885	0.871049	0.497701	0.00222988	0.172761	0.683716	0.290749	0.0422808	0.447846	-0.42324	0.895735	0.256341	0.00108683	0.570054	0.946301	0.109031	0.000112078	-0.669086	0.247984	0.0487415	0.51999	0.675039	0.240595	0.0460415	0.532896	-0.0548119	0.594517	0.888617	0.0913302	-0.418605	0.685769	0.26214
Unigene38108_DB	1	turquoise	0.75097	0.715712	0.0196931	0.0301402	0.0579071	0.565989	0.882362	0.112158	0.686277	0.824038	0.0412099	0.00630629	-0.627458	0.796675	0.0704599	0.0101645	0.73634	-0.223761	0.023675	0.562751	0.0956081	0.914199	0.806706	0.000559714	-0.233143	0.810578	0.546036	0.00804881	-0.0803814	0.453893	0.837128	0.219737	-0.124341	0.651101	0.749936	0.0575064	0.0565613	-0.500425	0.885081	0.170049	-0.640882	-0.0570724	0.0629021	0.884048	-0.214464	-0.0589731	0.579499
CL16511.Contig1_DB	1	turquoise	0.94493	0.886123	0.000122249	0.00146546	0.414446	0.930621	0.267402	0.000270509	0.948047	0.093845	0.000100006	0.810218	-0.351237	0.841111	0.354005	0.00449054	0.957815	0.592965	4.87131e-05	0.0923969	0.458714	0.102996	0.214258	0.792024	-0.271917	0.794266	0.479062	0.0105654	0.488652	0.956941	0.181945	5.22935e-05	-0.464888	0.194663	0.207352	0.615746	0.434234	0.344674	0.242863	0.363687	-0.410793	0.65489	0.27207	0.0555827	-0.258804	0.785555	0.501317
CL981.Contig2_DB	1	turquoise	0.80935	0.533777	0.00822236	0.138835	0.565482	0.48382	0.112551	0.18696	0.860774	0.29645	0.00288578	0.438575	-0.0465383	0.55713	0.905364	0.119158	0.833868	0.097525	0.00520971	0.802892	0.589279	0.315182	0.0949603	0.408722	-0.371884	0.520247	0.324373	0.151055	0.676849	0.452728	0.0452401	0.221072	-0.566633	0.214137	0.111659	0.580091	0.587345	-0.111773	0.0963226	0.774654	-0.088738	0.138277	0.820406	0.722755	-0.358233	0.221971	0.343822
Unigene3296_DB	1	turquoise	0.957769	0.631686	4.88968e-05	0.0680213	0.346427	0.491456	0.361088	0.17907	0.942259	0.746465	0.000143914	0.0208677	-0.424066	0.728323	0.255316	0.0260665	0.969968	-0.229587	1.50076e-05	0.552349	0.384514	0.843376	0.306881	0.0042804	-0.0865902	0.749076	0.824698	0.0201814	0.38286	0.375569	0.309144	0.319218	-0.416112	0.530669	0.265288	0.141589	0.362193	-0.470445	0.338122	0.201245	-0.501413	-0.079455	0.169072	0.838985	-0.0766296	-0.11308	0.844653
CL27687.Contig1_DB	1	turquoise	0.97347	0.561984	9.75817e-06	0.115291	0.520068	0.698565	0.151221	0.0363153	0.932435	-0.443819	0.000246988	0.231431	-0.319155	0.470103	0.402514	0.201617	0.94335	0.855885	0.000134763	0.00323999	0.562481	-0.370551	0.1149	0.326246	-0.289672	0.447339	0.449607	0.227307	0.248194	0.771003	0.519624	0.0149995	-0.587607	-0.349595	0.0961368	0.356415	0.523769	0.77589	0.147817	0.0139808	-0.354231	0.847359	0.349629	0.0039275	-0.271404	0.895854	0.479924
Unigene1520_DB	1	turquoise	0.883148	0.772845	0.00159905	0.01461	0.564985	0.637059	0.112938	0.0649998	0.845293	0.794134	0.00410796	0.0105878	-0.225356	0.849235	0.559897	0.0037684	0.837988	-0.174887	0.00479168	0.652679	0.60437	0.868976	0.0847352	0.00235293	-0.471277	0.852604	0.200338	0.00349383	0.210066	0.528986	0.587483	0.143094	-0.605548	0.641168	0.0839672	0.0627468	0.564328	-0.449849	0.113451	0.224391	-0.219613	-0.0126805	0.570201	0.974171	-0.44703	0.0126324	0.227666
CL5599.Contig3_DB	1	turquoise	0.659166	0.441411	0.0534618	0.234275	0.244409	0.522198	0.526218	0.149256	0.649617	-0.249753	0.0582708	0.516918	-0.31606	0.37166	0.407346	0.324687	0.658008	0.517694	0.0540312	0.153429	0.266417	-0.260481	0.488345	0.498448	-0.28027	0.323121	0.465104	0.396359	0.146647	0.576418	0.706555	0.104243	-0.282581	-0.150821	0.461275	0.698515	0.232919	0.454413	0.546433	0.219142	-0.342937	0.497778	0.36627	0.172684	-0.249533	0.623495	0.517299
CL21122.Contig1_DB	1	turquoise	0.848181	0.901848	0.0038572	0.000885099	0.0393515	0.821255	0.919937	0.00664311	0.79685	0.557859	0.0101357	0.118573	-0.707334	0.923281	0.0330637	0.000381806	0.848766	0.165192	0.0038077	0.671032	0.0848635	0.657245	0.828152	0.0544081	-0.166496	0.914435	0.668556	0.000554464	0.120336	0.760271	0.757793	0.0174081	-0.105625	0.463679	0.786813	0.208695	0.047722	-0.130914	0.902966	0.737085	-0.743213	0.305194	0.0217441	0.424522	-0.142805	0.358143	0.713979
CL3207.Contig1_DB	1	turquoise	0.931449	-0.737455	0.000259585	0.0233543	0.573542	-0.611602	0.10639	0.0800879	0.886283	-0.767103	0.00145852	0.0158472	-0.227565	-0.819572	0.555952	0.00685256	0.89297	0.17594	0.00118774	0.650695	0.608182	-0.780835	0.0822651	0.0129983	-0.246816	-0.804907	0.522021	0.00887167	0.184622	-0.517725	0.634411	0.1534	-0.641913	-0.653248	0.0623438	0.0564114	0.573053	0.463571	0.106758	0.208815	-0.260494	0.0395746	0.498426	0.919484	-0.233673	-0.0174245	0.545097
CL277.Contig2_DB	1	turquoise	0.929957	0.597975	0.000279486	0.0889812	0.683867	0.622667	0.0422172	0.0732882	0.932998	0.0236529	0.000239997	0.951837	-0.0922677	0.591831	0.813362	0.0931804	0.911326	0.443769	0.000626295	0.231489	0.730224	0.0837184	0.0254856	0.830443	-0.472121	0.571128	0.199422	0.108214	0.509125	0.62143	0.161553	0.0740297	-0.71786	-0.025525	0.0294186	0.948029	0.704376	0.259499	0.0341384	0.500127	-0.116088	0.475721	0.766147	0.195539	-0.465202	0.506158	0.207005
CL19390.Contig3_DB	1	turquoise	0.474933	0.615161	0.196385	0.0778597	0.286221	0.544965	0.45527	0.129186	0.566665	0.375915	0.111635	0.318737	0.00415499	0.640286	0.991536	0.0632265	0.544641	0.0932925	0.129459	0.811319	0.303961	0.458964	0.426492	0.213976	-0.190399	0.620386	0.62365	0.074659	0.783256	0.496748	0.0125346	0.173715	-0.263008	0.243915	0.494137	0.527081	0.32952	-0.137041	0.386522	0.725155	-0.055056	0.166562	0.888124	0.66843	-0.200371	0.21871	0.605219
CL2594.Contig1_DB	1	turquoise	0.956745	0.847657	5.31182e-05	0.00390188	0.465987	0.787651	0.206137	0.0117213	0.929175	0.547581	0.00029033	0.126988	-0.339272	0.876658	0.371751	0.00191941	0.943929	0.0875077	0.000130082	0.822864	0.504927	0.518055	0.165621	0.153092	-0.290538	0.83156	0.44819	0.00545441	0.283445	0.738827	0.459845	0.0229638	-0.525928	0.555538	0.145851	0.120443	0.47594	-0.18178	0.195304	0.639727	-0.378487	0.194823	0.315167	0.61545	-0.278675	0.335046	0.467756
CL27992.Contig2_DB	1	turquoise	-0.671519	-0.69551	0.0476261	0.0374947	-0.607847	-0.580331	0.0824804	0.101362	-0.598428	-0.66141	0.088676	0.05237	0.0562134	-0.740657	0.885784	0.0224494	-0.585695	0.09721	0.097494	0.803518	-0.643981	-0.782517	0.0612335	0.0126749	0.493194	-0.761252	0.177301	0.0171779	0.0935384	-0.490213	0.810829	0.180342	0.656538	-0.526467	0.0547594	0.145363	-0.595231	0.317607	0.0908418	0.404927	0.0153094	-0.0645931	0.968818	0.868869	0.478182	-0.0610907	0.19291
Unigene430_DB	1	turquoise	0.680835	0.826909	0.0435066	0.00597119	0.896782	0.893052	0.00105021	0.00118466	0.759059	-0.0156186	0.0176954	0.968189	0.399124	0.768787	0.287261	0.0154773	0.681764	0.639778	0.0431089	0.0635036	0.909031	0.000135441	0.000683295	0.999724	-0.539774	0.727652	0.133612	0.0262734	0.722021	0.926066	0.0280537	0.000336397	-0.873525	0.0938065	0.00208885	0.810295	0.908588	0.445742	0.000694711	0.229172	0.379803	0.691999	0.313348	0.0388811	-0.531104	0.810767	0.141202
CL9708.Contig2_DB	1	turquoise	0.319242	0.908295	0.402378	0.000702323	0.356165	0.93222	0.346816	0.000249697	0.370589	0.133004	0.326194	0.733009	0.109282	0.884807	0.779576	0.00152356	0.329597	0.599934	0.386403	0.0876666	0.376801	0.288931	0.317505	0.45082	-0.49773	0.891758	0.172732	0.00123401	0.410887	0.919054	0.271949	0.00045871	-0.318121	0.0862552	0.404126	0.825368	0.38243	0.365159	0.309734	0.333884	0.133908	0.710529	0.731248	0.031928	-0.509063	0.707914	0.161613
CL24394.Contig1_DB	1	turquoise	0.611562	0.973287	0.0801131	9.99367e-06	0.632976	0.958051	0.067288	4.77756e-05	0.726831	0.356584	0.0265283	0.346208	0.240219	0.97126	0.533555	1.28832e-05	0.664024	0.410959	0.0511157	0.271857	0.645985	0.414982	0.0601693	0.266721	-0.469557	0.946275	0.202214	0.000112269	0.861776	0.932173	0.00281662	0.000250293	-0.595821	0.350541	0.0904397	0.355026	0.661598	0.122515	0.0522789	0.753515	0.196332	0.524899	0.612661	0.146786	-0.470921	0.607569	0.200726
Unigene33922_DB	1	turquoise	0.930485	0.860074	0.000272324	0.00293478	0.250129	0.802919	0.516266	0.00917292	0.900976	0.482886	0.000912138	0.187939	-0.533334	0.873738	0.139226	0.002077	0.935147	0.184727	0.000214582	0.634216	0.292646	0.567528	0.444751	0.110968	-0.217311	0.86854	0.574351	0.00237936	0.249181	0.746119	0.517911	0.0209597	-0.316022	0.422495	0.407406	0.257269	0.260955	-0.0532834	0.497638	0.891708	-0.583766	0.322286	0.0988742	0.397651	-0.201276	0.374167	0.603556
CL19129.Contig1_DB	1	turquoise	0.830015	0.868266	0.00562251	0.00239609	0.189721	0.929551	0.62491	0.000285083	0.736159	-0.0499175	0.0237272	0.89852	-0.553316	0.804017	0.12225	0.00900566	0.793959	0.741516	0.0106173	0.0222107	0.228922	0.0947993	0.553532	0.808317	0.0875929	0.801812	0.822694	0.00934371	-0.0485911	0.948714	0.901206	9.56512e-05	-0.291069	-0.0360614	0.447323	0.926616	0.190762	0.545341	0.622975	0.128868	-0.603114	0.824955	0.085559	0.00619784	0.100008	0.848369	0.797955
CL14555.Contig1_DB	1	turquoise	0.880789	-0.702725	0.00171083	0.0347481	0.680159	-0.600347	0.0437976	0.0873916	0.925738	-0.680967	0.000341543	0.0434501	0.00954872	-0.772031	0.980549	0.0147814	0.895581	0.169781	0.00109227	0.662326	0.709166	-0.625075	0.0324093	0.0718579	-0.338905	-0.73586	0.372302	0.023814	0.674525	-0.52191	0.0462707	0.149521	-0.703528	-0.628705	0.0344505	0.069735	0.6977	0.406647	0.0366469	0.277417	-0.0509231	0.0599909	0.896484	0.878153	-0.327604	-0.0551889	0.389455
Unigene36162_DB	1	turquoise	0.929762	0.894971	0.000282165	0.00111409	0.503406	0.820784	0.16711	0.00670129	0.895274	0.507746	0.00110321	0.162883	-0.264247	0.910121	0.492028	0.0006558	0.911116	0.248275	0.000631361	0.519484	0.539578	0.682423	0.133781	0.0428282	-0.0491924	0.927626	0.899988	0.000312688	0.329409	0.755967	0.386691	0.0184423	-0.580045	0.371549	0.101572	0.324843	0.511859	-0.0447432	0.158934	0.909002	-0.332612	0.403736	0.381808	0.281205	-0.0371181	0.388521	0.92447
CL15388.Contig2_DB	1	turquoise	0.965398	0.972125	2.45302e-05	1.15865e-05	0.567361	0.957671	0.111097	4.92892e-05	0.958795	0.293699	4.49074e-05	0.443038	-0.232861	0.960069	0.546536	4.02862e-05	0.954475	0.505942	6.33895e-05	0.164632	0.609002	0.469909	0.08174	0.201829	-0.349245	0.968755	0.35693	1.72194e-05	0.455152	0.922609	0.218298	0.000393391	-0.610121	0.207223	0.0810263	0.592665	0.58443	0.224427	0.0983981	0.561559	-0.26948	0.640215	0.483166	0.0632653	-0.337686	0.638259	0.374135
CL27787.Contig1_DB	1	turquoise	0.974932	0.575722	8.01367e-06	0.10476	0.365636	0.524459	0.333205	0.147186	0.962897	0.406206	3.12399e-05	0.27799	-0.427847	0.60052	0.250646	0.0872759	0.984624	-0.0209705	1.46201e-06	0.957295	0.406557	0.355229	0.277534	0.348176	-0.174969	0.562413	0.652526	0.114953	0.410253	0.482582	0.272763	0.188258	-0.426378	0.405672	0.252455	0.278683	0.382076	-0.171754	0.31022	0.658593	-0.493263	0.0507075	0.177232	0.896921	-0.161635	0.17348	0.677804
CL9079.Contig1_DB	1	turquoise	0.828513	0.787273	0.00578934	0.0117898	0.289186	0.736662	0.450401	0.023582	0.775426	0.396198	0.0140755	0.291137	-0.465808	0.780341	0.206334	0.0130942	0.803564	0.247393	0.00907444	0.521017	0.351553	0.565454	0.353542	0.112574	-0.416799	0.802679	0.264419	0.00920982	0.117978	0.686027	0.762427	0.0413137	-0.355822	0.309638	0.347314	0.41746	0.310269	0.0361741	0.416461	0.926387	-0.47349	0.394922	0.197941	0.292836	-0.419615	0.385241	0.260872
CL17661.Contig1_DB	1	turquoise	0.741595	-0.801945	0.0221889	0.00932306	0.00972882	-0.808167	0.980182	0.00839207	0.70912	-0.222745	0.0324257	0.564572	-0.604811	-0.806076	0.0844477	0.00869753	0.762246	-0.370703	0.016947	0.326033	0.0474759	-0.202299	0.903464	0.601677	-0.020723	-0.757727	0.957799	0.0180145	0.128222	-0.797803	0.742341	0.00998023	-0.0828693	-0.239539	0.832143	0.534751	0.0228595	-0.134328	0.953451	0.730432	-0.669561	-0.427455	0.0485226	0.251128	-0.0169175	-0.546355	0.965544
CL19331.Contig1_DB	1	turquoise	0.88606	-0.771601	0.0014682	0.0148724	0.249202	-0.836748	0.517873	0.00491501	0.826502	-0.0539015	0.00601788	0.890458	-0.530706	-0.714593	0.141556	0.0305202	0.86659	-0.576504	0.0025002	0.104178	0.300002	-0.0375633	0.432843	0.923567	-0.142092	-0.674479	0.715358	0.0462911	0.173038	-0.855082	0.656167	0.0033009	-0.328388	-0.203843	0.388253	0.598845	0.261534	-0.384319	0.49665	0.307148	-0.572731	-0.636228	0.107001	0.0654615	-0.127221	-0.74925	0.744298
CL17000.Contig2_DB	1	turquoise	-0.387248	0.512034	0.303159	0.158768	0.166336	0.455613	0.66886	0.217773	-0.267114	0.434398	0.487164	0.242664	0.540477	0.510181	0.133007	0.160538	-0.351757	0.0733067	0.353243	0.851328	0.151929	0.582982	0.696386	0.0994389	-0.512993	0.539233	0.157856	0.134079	0.415669	0.391255	0.265849	0.297745	-0.0527609	0.386264	0.892765	0.304496	0.180217	-0.110485	0.642657	0.777199	0.600033	0.208475	0.0876008	0.590381	-0.517236	0.169593	0.153857
[truncated: 13,509 more rows]
[truncated: 77 more columns]

## Sheet: Core Genes
Table S3-2. Core Genes in CMs
GeneSymbol	CM_NUMBER	ModuleColor
CL13201.Contig1_DB	1	turquoise
CL11398.Contig2_DB	1	turquoise
CL12091.Contig3_DB	1	turquoise
CL20956.Contig1_DB	1	turquoise
Unigene35012_DB	1	turquoise
CL22348.Contig2_DB	1	turquoise
Unigene4125_DB	1	turquoise
CL26960.Contig1_DB	1	turquoise
CL11918.Contig1_DB	1	turquoise
CL359.Contig1_DB	1	turquoise
Unigene4451_DB	1	turquoise
[truncated: 3,848 more rows]
