# Supplementary material for: Flexible response and rapid recovery strategies of the plateau forage Poa crymophila to cold and drought
Source: Front Plant Sci. 2022 Nov 8;13:970496. doi: 10.3389/fpls.2022.970496 (PMC9681527; doi:10.3389/fpls.2022.970496)
Supplement: Supplementary Table 4 — The results of module preservation analysis. [file Table_4.xlsx]

## Sheet: Sheet1
Table S4. The results of module preservation analysis
CMs	MedianRank.pres	MedianRank.qual	Zsummary.pres	Zsummary.qual
black	4	23.5	31	29
blue	32	25	0.0045	45
brown	16	31	24	26
cyan	18	19	9.1	20
darkgreen	30	17.5	-0.15	13
darkgrey	27	4	1.4	18
darkorange	6	20	11	10
darkred	26	22	1	12
darkturquoise	8	14	9.4	16
gold	23	32	9.2	-1.1
green	11	27	27	34
greenyellow	14	10	18	27
grey	30	33	1.7	-16
grey60	21	23.5	5.2	15
lightcyan	2	12	20	19
lightgreen	19	12.5	8.1	16
lightyellow	30	6	1.9	19
magenta	30	1	1.3	34
midnightblue	28	16	0.78	19
orange	8	12.5	9.2	13
paleturquoise	1	2	12	14
pink	22	28.5	8.6	21
purple	27	5	3.2	29
red	28	9	3.1	38
royalblue	10	7.5	14	17
saddlebrown	6	3	8.2	13
salmon	13	26	17	17
skyblue	9	8	9.3	14
steelblue	17	17	5.6	11
tan	3	21	22	21
turquoise	12	28.5	30	37
white	13	15.5	8.7	12
yellow	20	30	24	27
