# Supplementary material for: Flexible response and rapid recovery strategies of the plateau forage Poa crymophila to cold and drought
Source: Front Plant Sci. 2022 Nov 8;13:970496. doi: 10.3389/fpls.2022.970496 (PMC9681527; doi:10.3389/fpls.2022.970496)
Supplement: Supplementary Table 6 — The association results between differential metabolomes and co-expression networks. [file Table_6.xlsx]

## Sheet: S6-1
Table S6-1. The association results between differential metabolomes and cold related co-expression networks
Compounds	MEblue	p.MEblue	MEmagenta	p.MEmagenta	MEdarkred	p.MEdarkred	MEgreenyellow	p.MEgreenyellow	MElightgreen	p.MElightgreen	MEred	p.MEred	MEbrown	p.MEbrown	MEpink	p.MEpink	MEdarkgreen	p.MEdarkgreen	MEblack	p.MEblack	MEdarkturquoise	p.MEdarkturquoise	MEdarkgrey	p.MEdarkgrey	MEturquoise	p.MEturquoise	MEroyalblue	p.MEroyalblue	MEyellow	p.MEyellow	MEcyan	p.MEcyan	MEmidnightblue	p.MEmidnightblue	MEgrey60	p.MEgrey60	MEsalmon	p.MEsalmon	MEgreen	p.MEgreen	MElightyellow	p.MElightyellow	MElightcyan	p.MElightcyan	MEpurple	p.MEpurple	MEtan	p.MEtan	MEgrey
Acacetin	-0.64	0.06	-0.079	0.8	-0.77	0.02	-0.65	0.06	-0.29	0.5	-0.37	0.3	-0.052	0.9	-0.19	0.6	0.45	0.2	0.31	0.4	0.37	0.3	0.58	0.1	0.93	0.0002	0.77	0.02	0.56	0.1	0.14	0.7	0.2	0.6	0.57	0.1	0.28	0.5	-0.37	0.3	0.13	0.7	0.28	0.5	0.49	0.2	-0.029	0.9	0.083
Acacetin.C.hexoside	-0.12	0.8	0.37	0.3	-0.63	0.07	-0.59	0.1	-0.48	0.2	-0.76	0.02	-0.57	0.1	-0.6	0.09	0.33	0.4	-0.0028	1	0.47	0.2	0.58	0.1	0.82	0.007	0.4	0.3	0.05	0.9	-0.19	0.6	-0.16	0.7	0.29	0.5	0.45	0.2	-0.18	0.6	0.094	0.8	0.22	0.6	0.12	0.8	-0.14	0.7	0.034
Acacetin.O.acetyl.hexoside	0.98	6e-06	0.65	0.06	0.46	0.2	0.43	0.2	-0.24	0.5	-0.31	0.4	-0.7	0.03	-0.51	0.2	-0.13	0.7	-0.43	0.2	0.067	0.9	-0.25	0.5	-0.51	0.2	-0.79	0.01	-0.9	0.0008	-0.45	0.2	-0.43	0.2	-0.42	0.3	0.24	0.5	0.34	0.4	-0.087	0.8	-0.28	0.5	-0.63	0.07	-0.022	1	-0.1
Acetylacteoside	-0.57	0.1	-0.049	0.9	-0.75	0.02	-0.75	0.02	-0.28	0.5	-0.48	0.2	-0.11	0.8	-0.25	0.5	0.31	0.4	0.15	0.7	0.35	0.4	0.67	0.05	0.89	0.001	0.7	0.03	0.46	0.2	0.15	0.7	0.065	0.9	0.45	0.2	0.23	0.5	-0.3	0.4	0.17	0.7	0.25	0.5	0.36	0.3	-0.15	0.7	0.13
Acid.orange	0.35	0.3	-0.18	0.6	0.72	0.03	0.67	0.05	0.42	0.3	0.63	0.07	0.36	0.3	0.44	0.2	-0.36	0.3	-0.11	0.8	-0.44	0.2	-0.62	0.07	-0.9	0.001	-0.58	0.1	-0.27	0.5	0.037	0.9	0.022	1	-0.4	0.3	-0.37	0.3	0.25	0.5	-0.13	0.7	-0.26	0.5	-0.27	0.5	0.12	0.8	-0.087
Adenine	-0.12	0.8	-0.51	0.2	0.53	0.1	0.51	0.2	0.54	0.1	0.83	0.005	0.73	0.02	0.72	0.03	-0.3	0.4	0.13	0.7	-0.48	0.2	-0.52	0.2	-0.69	0.04	-0.21	0.6	0.18	0.7	0.27	0.5	0.25	0.5	-0.19	0.6	-0.51	0.2	0.086	0.8	-0.093	0.8	-0.13	0.7	0.049	0.9	0.16	0.7	-0.047
Afzelechin	0.63	0.07	0.07	0.9	0.76	0.02	0.71	0.03	0.27	0.5	0.42	0.3	0.068	0.9	0.2	0.6	-0.34	0.4	-0.23	0.5	-0.34	0.4	-0.61	0.08	-0.92	0.0004	-0.74	0.02	-0.53	0.1	-0.14	0.7	-0.13	0.7	-0.5	0.2	-0.25	0.5	0.33	0.4	-0.15	0.7	-0.3	0.4	-0.44	0.2	0.086	0.8	-0.088
aminobutyric.acid	0.55	0.1	0.026	0.9	0.77	0.01	0.73	0.03	0.31	0.4	0.5	0.2	0.15	0.7	0.26	0.5	-0.33	0.4	-0.15	0.7	-0.36	0.3	-0.65	0.06	-0.91	0.0007	-0.69	0.04	-0.44	0.2	-0.13	0.7	-0.07	0.9	-0.5	0.2	-0.3	0.4	0.28	0.5	-0.19	0.6	-0.26	0.5	-0.38	0.3	0.1	0.8	-0.089
Apigenin	-0.93	0.0003	-0.56	0.1	-0.4	0.3	-0.25	0.5	0.17	0.7	0.46	0.2	0.67	0.05	0.51	0.2	0.17	0.7	0.63	0.07	0.069	0.9	0.28	0.5	0.53	0.1	0.65	0.06	0.96	5e-05	0.58	0.1	0.57	0.1	0.61	0.08	-0.082	0.8	-0.38	0.3	0.14	0.7	0.26	0.5	0.79	0.01	0.25	0.5	-0.12
Apigenin.6.C.pentoside	0.61	0.08	0.061	0.9	0.65	0.06	0.68	0.04	0.25	0.5	0.35	0.4	0.029	0.9	0.21	0.6	-0.41	0.3	-0.27	0.5	-0.39	0.3	-0.65	0.06	-0.89	0.001	-0.81	0.009	-0.57	0.1	-0.14	0.7	-0.12	0.8	-0.38	0.3	-0.069	0.9	0.39	0.3	-0.055	0.9	-0.28	0.5	-0.35	0.4	0.2	0.6	-0.23
Apigenin.8.C.pentoside	0.61	0.08	0.071	0.9	0.78	0.01	0.7	0.03	0.24	0.5	0.47	0.2	0.086	0.8	0.18	0.6	-0.28	0.5	-0.18	0.6	-0.29	0.4	-0.59	0.09	-0.91	0.0007	-0.71	0.03	-0.49	0.2	-0.094	0.8	-0.068	0.9	-0.51	0.2	-0.3	0.4	0.28	0.5	-0.17	0.7	-0.31	0.4	-0.46	0.2	0.065	0.9	-0.00094
Asp.phe	0.11	0.8	-0.36	0.3	0.64	0.06	0.6	0.09	0.5	0.2	0.76	0.02	0.58	0.1	0.6	0.09	-0.32	0.4	0.028	0.9	-0.47	0.2	-0.59	0.1	-0.81	0.009	-0.39	0.3	-0.031	0.9	0.16	0.7	0.15	0.7	-0.29	0.4	-0.46	0.2	0.15	0.7	-0.13	0.7	-0.21	0.6	-0.11	0.8	0.14	0.7	-0.065
Azadiradione	0.51	0.2	-0.035	0.9	0.75	0.02	0.7	0.03	0.33	0.4	0.52	0.2	0.2	0.6	0.31	0.4	-0.36	0.3	-0.17	0.7	-0.39	0.3	-0.63	0.07	-0.92	0.0004	-0.68	0.04	-0.42	0.3	-0.067	0.9	-0.061	0.9	-0.46	0.2	-0.3	0.4	0.3	0.4	-0.14	0.7	-0.28	0.5	-0.36	0.3	0.11	0.8	-0.091
Azelaic.acid	0.37	0.3	-0.17	0.7	0.73	0.03	0.67	0.05	0.41	0.3	0.62	0.07	0.35	0.4	0.43	0.2	-0.36	0.3	-0.11	0.8	-0.44	0.2	-0.63	0.07	-0.9	0.0008	-0.59	0.1	-0.28	0.5	0.025	0.9	0.014	1	-0.41	0.3	-0.37	0.3	0.25	0.5	-0.14	0.7	-0.26	0.5	-0.28	0.5	0.12	0.8	-0.081
Baicalein.glucuronide.Baicalin	-0.91	0.0007	-0.44	0.2	-0.68	0.05	-0.64	0.07	0.017	1	-0.048	0.9	0.39	0.3	0.2	0.6	0.24	0.5	0.35	0.4	0.12	0.8	0.48	0.2	0.77	0.01	0.84	0.004	0.81	0.009	0.35	0.4	0.31	0.4	0.53	0.1	0.0024	1	-0.37	0.3	0.14	0.7	0.3	0.4	0.6	0.09	-0.035	0.9	0.082
Benzamide	-0.97	2e-05	-0.57	0.1	-0.62	0.07	-0.57	0.1	0.1	0.8	0.11	0.8	0.55	0.1	0.37	0.3	0.19	0.6	0.37	0.3	0.021	1	0.37	0.3	0.65	0.06	0.82	0.006	0.85	0.004	0.43	0.2	0.4	0.3	0.52	0.2	-0.083	0.8	-0.33	0.4	0.17	0.7	0.29	0.4	0.63	0.07	0.011	1	0.12
beta.D.Glucopyranosyl.sinapate	-0.88	0.002	-0.35	0.4	-0.53	0.1	-0.41	0.3	0.057	0.9	0.11	0.8	0.42	0.3	0.32	0.4	0.19	0.6	0.52	0.2	0.14	0.7	0.35	0.4	0.74	0.02	0.83	0.006	0.86	0.003	0.22	0.6	0.31	0.4	0.42	0.3	-0.065	0.9	-0.36	0.3	0.033	0.9	0.47	0.2	0.71	0.03	0.078	0.8	-0.04
Betaine	0.29	0.4	-0.26	0.5	0.67	0.05	0.63	0.07	0.44	0.2	0.64	0.06	0.42	0.3	0.5	0.2	-0.37	0.3	-0.13	0.7	-0.48	0.2	-0.62	0.07	-0.9	0.0008	-0.54	0.1	-0.25	0.5	0.081	0.8	0.034	0.9	-0.35	0.4	-0.37	0.3	0.27	0.5	-0.083	0.8	-0.27	0.5	-0.24	0.5	0.13	0.7	-0.07
Biochanin.A	-0.65	0.06	-0.092	0.8	-0.77	0.02	-0.66	0.05	-0.27	0.5	-0.38	0.3	-0.04	0.9	-0.18	0.6	0.44	0.2	0.29	0.4	0.35	0.4	0.55	0.1	0.92	0.0004	0.77	0.02	0.56	0.1	0.12	0.8	0.2	0.6	0.55	0.1	0.26	0.5	-0.36	0.3	0.12	0.8	0.29	0.5	0.48	0.2	-0.045	0.9	0.096
C.hexosyl.chrysin.O.feruloylhexoside	0.55	0.1	0.043	0.9	0.69	0.04	0.76	0.02	0.19	0.6	0.52	0.2	0.11	0.8	0.32	0.4	-0.34	0.4	-0.12	0.8	-0.29	0.5	-0.64	0.06	-0.88	0.002	-0.7	0.04	-0.46	0.2	-0.065	0.9	-0.017	1	-0.4	0.3	-0.19	0.6	0.4	0.3	-0.041	0.9	-0.18	0.6	-0.29	0.5	0.25	0.5	-0.087
C.hexosyl.chrysoeriol.sinapoylhexoside	-0.92	0.0004	-0.78	0.01	-0.41	0.3	-0.56	0.1	0.53	0.1	0.11	0.8	0.75	0.02	0.4	0.3	0.0015	1	0.13	0.7	-0.4	0.3	0.17	0.7	0.35	0.4	0.63	0.07	0.76	0.02	0.34	0.4	0.25	0.5	0.39	0.3	-0.23	0.5	-0.45	0.2	-0.056	0.9	-0.03	0.9	0.43	0.3	-0.22	0.6	-0.091
Caffeate	-0.49	0.2	0.055	0.9	-0.76	0.02	-0.7	0.04	-0.35	0.4	-0.55	0.1	-0.23	0.6	-0.33	0.4	0.36	0.3	0.16	0.7	0.39	0.3	0.62	0.07	0.92	0.0005	0.66	0.05	0.39	0.3	0.049	0.9	0.055	0.9	0.46	0.2	0.33	0.4	-0.28	0.5	0.15	0.7	0.28	0.5	0.36	0.3	-0.1	0.8	0.091
Caffeic.acid.O.glucoside	-0.66	0.05	-0.12	0.8	-0.77	0.02	-0.72	0.03	-0.22	0.6	-0.42	0.3	-0.021	1	-0.17	0.7	0.34	0.4	0.22	0.6	0.29	0.4	0.58	0.1	0.91	0.0007	0.74	0.02	0.55	0.1	0.14	0.7	0.15	0.7	0.5	0.2	0.24	0.5	-0.34	0.4	0.14	0.7	0.28	0.5	0.45	0.2	-0.1	0.8	0.083
Caffeic.aldehyde	0.57	0.1	0.0042	1	0.75	0.02	0.7	0.04	0.31	0.4	0.47	0.2	0.14	0.7	0.26	0.5	-0.36	0.3	-0.21	0.6	-0.38	0.3	-0.62	0.07	-0.93	0.0003	-0.71	0.03	-0.48	0.2	-0.093	0.8	-0.095	0.8	-0.47	0.2	-0.27	0.5	0.32	0.4	-0.14	0.7	-0.3	0.4	-0.41	0.3	0.098	0.8	-0.093
Caffeoyl.quinic.acid	-0.82	0.007	-0.33	0.4	-0.74	0.02	-0.72	0.03	-0.076	0.8	-0.23	0.6	0.22	0.6	0.021	1	0.29	0.5	0.28	0.5	0.18	0.6	0.53	0.1	0.85	0.004	0.8	0.01	0.71	0.03	0.28	0.5	0.27	0.5	0.53	0.1	0.1	0.8	-0.38	0.3	0.14	0.7	0.26	0.5	0.52	0.1	-0.093	0.8	0.11
Chlorogenic.acid.Caffeoylquinic.acid	-0.95	9e-05	-0.7	0.04	-0.37	0.3	-0.24	0.5	0.3	0.4	0.46	0.2	0.78	0.01	0.64	0.06	0.097	0.8	0.47	0.2	-0.13	0.7	0.16	0.7	0.37	0.3	0.69	0.04	0.89	0.001	0.48	0.2	0.45	0.2	0.52	0.2	-0.19	0.6	-0.29	0.4	0.12	0.8	0.24	0.5	0.71	0.03	0.18	0.6	-0.069
Chrysoeriol.C.hexosyl.O.rhamnoside	0.97	1e-05	0.56	0.1	0.6	0.09	0.55	0.1	-0.13	0.7	-0.13	0.7	-0.56	0.1	-0.35	0.4	-0.18	0.6	-0.43	0.3	-0.03	0.9	-0.38	0.3	-0.68	0.05	-0.79	0.01	-0.89	0.001	-0.45	0.2	-0.43	0.3	-0.54	0.1	0.066	0.9	0.39	0.3	-0.13	0.7	-0.27	0.5	-0.67	0.05	-0.025	0.9	-0.033
Chrysoeriol.glucuronic.acid	-0.98	2e-06	-0.7	0.04	-0.42	0.3	-0.39	0.3	0.26	0.5	0.4	0.3	0.76	0.02	0.57	0.1	0.097	0.8	0.46	0.2	-0.082	0.8	0.24	0.5	0.45	0.2	0.73	0.03	0.92	0.0004	0.55	0.1	0.49	0.2	0.47	0.2	-0.23	0.5	-0.33	0.4	0.13	0.7	0.24	0.5	0.66	0.05	0.084	0.8	0.067
Chrysoeriol.O.hexosyl.O.hexoside	-0.32	0.4	0.21	0.6	-0.7	0.03	-0.64	0.06	-0.39	0.3	-0.67	0.05	-0.4	0.3	-0.5	0.2	0.43	0.2	0.1	0.8	0.42	0.3	0.57	0.1	0.89	0.001	0.55	0.1	0.24	0.5	-0.11	0.8	-0.022	1	0.42	0.3	0.41	0.3	-0.31	0.4	0.061	0.9	0.19	0.6	0.24	0.5	-0.14	0.7	0.039
Chrysoeriol.O.rhamnosyl.O.glucuronic.acid	-0.72	0.03	-0.19	0.6	-0.77	0.02	-0.69	0.04	-0.19	0.6	-0.34	0.4	0.054	0.9	-0.11	0.8	0.38	0.3	0.26	0.5	0.27	0.5	0.56	0.1	0.89	0.001	0.79	0.01	0.6	0.09	0.18	0.7	0.19	0.6	0.56	0.1	0.22	0.6	-0.37	0.3	0.14	0.7	0.26	0.5	0.49	0.2	-0.067	0.9	0.073
Coniferin	-0.64	0.06	-0.088	0.8	-0.78	0.01	-0.72	0.03	-0.26	0.5	-0.43	0.3	-0.054	0.9	-0.19	0.6	0.32	0.4	0.23	0.6	0.33	0.4	0.59	0.09	0.92	0.0004	0.72	0.03	0.54	0.1	0.15	0.7	0.16	0.7	0.5	0.2	0.26	0.5	-0.32	0.4	0.16	0.7	0.3	0.4	0.45	0.2	-0.081	0.8	0.086
Cordycepin	-0.17	0.7	-0.55	0.1	0.47	0.2	0.46	0.2	0.53	0.1	0.82	0.006	0.76	0.02	0.76	0.02	-0.33	0.4	0.12	0.8	-0.49	0.2	-0.53	0.1	-0.66	0.05	-0.2	0.6	0.2	0.6	0.31	0.4	0.28	0.5	-0.15	0.7	-0.47	0.2	0.12	0.8	-0.03	0.9	-0.1	0.8	0.092	0.8	0.19	0.6	-0.036
Cotinine	-0.51	0.2	0.046	0.9	-0.73	0.03	-0.7	0.03	-0.32	0.4	-0.52	0.2	-0.2	0.6	-0.32	0.4	0.35	0.4	0.18	0.7	0.4	0.3	0.66	0.05	0.92	0.0004	0.68	0.04	0.43	0.3	0.073	0.9	0.043	0.9	0.44	0.2	0.28	0.5	-0.31	0.4	0.13	0.7	0.28	0.5	0.36	0.3	-0.13	0.7	0.086
Coumarin	0.62	0.07	0.049	0.9	0.74	0.02	0.65	0.06	0.29	0.4	0.38	0.3	0.067	0.9	0.2	0.6	-0.43	0.2	-0.3	0.4	-0.4	0.3	-0.61	0.08	-0.93	0.0002	-0.78	0.01	-0.56	0.1	-0.12	0.8	-0.16	0.7	-0.51	0.2	-0.23	0.6	0.37	0.3	-0.11	0.8	-0.3	0.4	-0.45	0.2	0.07	0.9	-0.12
Coumaroyl.choline	-0.77	0.02	-0.44	0.2	-0.45	0.2	-0.6	0.09	0.045	0.9	0.091	0.8	0.46	0.2	0.13	0.7	0.26	0.5	0.38	0.3	0.093	0.8	0.21	0.6	0.57	0.1	0.62	0.07	0.75	0.02	0.4	0.3	0.58	0.1	0.22	0.6	-0.25	0.5	-0.43	0.2	0.007	1	0.17	0.7	0.32	0.4	-0.2	0.6	0.45
Creatine	0.72	0.03	0.12	0.8	0.62	0.07	0.6	0.09	0.14	0.7	0.21	0.6	-0.11	0.8	0.054	0.9	-0.33	0.4	-0.4	0.3	-0.32	0.4	-0.55	0.1	-0.9	0.0009	-0.82	0.007	-0.7	0.03	-0.12	0.8	-0.19	0.6	-0.38	0.3	-0.043	0.9	0.42	0.3	-0.0063	1	-0.39	0.3	-0.52	0.2	0.1	0.8	-0.082
Cryptochlorogenic.acid	-0.77	0.01	-0.27	0.5	-0.85	0.003	-0.69	0.04	-0.28	0.5	-0.24	0.5	0.13	0.7	0.13	0.7	0.14	0.7	0.25	0.5	0.25	0.5	0.47	0.2	0.84	0.004	0.72	0.03	0.61	0.08	0.33	0.4	0.31	0.4	0.55	0.1	0.26	0.5	-0.088	0.8	0.41	0.3	0.47	0.2	0.63	0.07	0.13	0.7	0.15
CYS.GLY	-0.93	0.0003	-0.59	0.09	-0.61	0.08	-0.63	0.07	0.11	0.8	0.13	0.7	0.55	0.1	0.25	0.5	0.17	0.7	0.39	0.3	0.053	0.9	0.47	0.2	0.65	0.06	0.63	0.07	0.86	0.003	0.67	0.05	0.52	0.2	0.66	0.05	0.018	1	-0.42	0.3	0.23	0.5	0.081	0.8	0.61	0.08	0.028	0.9	0.021
D..Glucono.1.5.lactone	0.73	0.03	0.14	0.7	0.7	0.03	0.56	0.1	0.24	0.5	0.17	0.7	-0.086	0.8	-0.1	0.8	-0.15	0.7	-0.35	0.3	-0.35	0.4	-0.64	0.06	-0.88	0.002	-0.78	0.01	-0.66	0.05	-0.26	0.5	-0.12	0.7	-0.5	0.2	-0.18	0.6	0.17	0.7	-0.27	0.5	-0.52	0.2	-0.66	0.05	-0.11	0.8	0.026
D.Fructose.6.phosphate	0.88	0.002	0.39	0.3	0.66	0.06	0.65	0.06	-0.055	0.9	0.097	0.8	-0.35	0.4	-0.12	0.8	-0.23	0.6	-0.36	0.3	-0.12	0.8	-0.52	0.2	-0.81	0.008	-0.8	0.01	-0.81	0.009	-0.32	0.4	-0.27	0.5	-0.54	0.1	-0.035	0.9	0.44	0.2	-0.082	0.8	-0.26	0.5	-0.6	0.09	0.067	0.9	0.031
D.Fructose.6.phosphate.disodium.salt	0.83	0.005	0.32	0.4	0.72	0.03	0.67	0.05	0.1	0.8	0.16	0.7	-0.24	0.5	-0.063	0.9	-0.32	0.4	-0.35	0.4	-0.23	0.6	-0.55	0.1	-0.85	0.004	-0.84	0.005	-0.74	0.02	-0.31	0.4	-0.28	0.5	-0.55	0.1	-0.086	0.8	0.38	0.3	-0.15	0.7	-0.3	0.4	-0.57	0.1	0.043	0.9	-0.11
D.glucoronic.acid	0.29	0.4	-0.27	0.5	0.72	0.03	0.59	0.1	0.5	0.2	0.61	0.08	0.44	0.2	0.39	0.3	-0.24	0.5	-0.12	0.8	-0.5	0.2	-0.63	0.07	-0.9	0.001	-0.49	0.2	-0.22	0.6	0.02	1	0.058	0.9	-0.41	0.3	-0.48	0.2	0.1	0.8	-0.25	0.5	-0.38	0.3	-0.36	0.3	-0.031	0.9	0.021
D.Glucose.6.phosphate	0.84	0.004	0.33	0.4	0.72	0.03	0.66	0.05	0.099	0.8	0.14	0.7	-0.26	0.5	-0.087	0.8	-0.3	0.4	-0.36	0.3	-0.22	0.6	-0.52	0.1	-0.84	0.004	-0.83	0.005	-0.75	0.02	-0.31	0.4	-0.31	0.4	-0.53	0.1	-0.066	0.9	0.37	0.3	-0.15	0.7	-0.32	0.4	-0.57	0.1	0.039	0.9	-0.13
D.Xylonic.acid	0.85	0.004	0.35	0.4	0.71	0.03	0.69	0.04	0.016	1	0.17	0.7	-0.27	0.5	-0.11	0.8	-0.13	0.7	-0.3	0.4	-0.14	0.7	-0.56	0.1	-0.83	0.005	-0.73	0.02	-0.75	0.02	-0.35	0.4	-0.24	0.5	-0.55	0.1	-0.13	0.7	0.34	0.4	-0.19	0.6	-0.31	0.4	-0.62	0.08	0.019	1	0.061
Dehydrovomifoliol	0.5	0.2	-0.045	0.9	0.76	0.02	0.71	0.03	0.34	0.4	0.54	0.1	0.21	0.6	0.33	0.4	-0.36	0.3	-0.16	0.7	-0.39	0.3	-0.62	0.08	-0.92	0.0004	-0.66	0.05	-0.4	0.3	-0.055	0.9	-0.063	0.9	-0.45	0.2	-0.32	0.4	0.3	0.4	-0.14	0.7	-0.27	0.5	-0.35	0.4	0.11	0.8	-0.096
Deoxycytidine	-0.056	0.9	-0.46	0.2	0.54	0.1	0.54	0.1	0.51	0.2	0.82	0.007	0.68	0.04	0.71	0.03	-0.32	0.4	0.11	0.8	-0.47	0.2	-0.57	0.1	-0.71	0.03	-0.27	0.5	0.12	0.8	0.23	0.5	0.25	0.5	-0.22	0.6	-0.47	0.2	0.14	0.7	-0.079	0.8	-0.11	0.8	0.033	0.9	0.19	0.6	-0.052
Deoxyguanosine	-0.097	0.8	-0.51	0.2	0.53	0.1	0.49	0.2	0.55	0.1	0.81	0.008	0.72	0.03	0.71	0.03	-0.34	0.4	0.09	0.8	-0.5	0.2	-0.53	0.1	-0.71	0.03	-0.26	0.5	0.14	0.7	0.28	0.5	0.24	0.5	-0.19	0.6	-0.48	0.2	0.11	0.8	-0.066	0.9	-0.15	0.7	0.034	0.9	0.16	0.7	-0.063
dephospho.CoA	-0.85	0.004	-0.39	0.3	-0.75	0.02	-0.74	0.02	-0.051	0.9	-0.19	0.6	0.27	0.5	0.07	0.9	0.24	0.5	0.26	0.5	0.15	0.7	0.55	0.1	0.82	0.007	0.78	0.01	0.72	0.03	0.38	0.3	0.28	0.5	0.57	0.1	0.11	0.8	-0.36	0.3	0.2	0.6	0.23	0.5	0.54	0.1	-0.072	0.9	0.087
Di.O.methylquercetin	0.46	0.2	-0.091	0.8	0.74	0.02	0.69	0.04	0.36	0.3	0.56	0.1	0.26	0.5	0.35	0.4	-0.36	0.3	-0.16	0.7	-0.41	0.3	-0.63	0.07	-0.92	0.0004	-0.65	0.06	-0.38	0.3	-0.023	1	-0.03	0.9	-0.44	0.2	-0.33	0.4	0.29	0.5	-0.13	0.7	-0.28	0.5	-0.34	0.4	0.11	0.8	-0.076
Dihydropinosylvin	-0.98	2e-06	-0.7	0.03	-0.43	0.2	-0.4	0.3	0.27	0.5	0.38	0.3	0.76	0.02	0.57	0.1	0.086	0.8	0.44	0.2	-0.11	0.8	0.22	0.6	0.45	0.2	0.72	0.03	0.91	0.0006	0.52	0.2	0.48	0.2	0.46	0.2	-0.23	0.6	-0.33	0.4	0.12	0.8	0.24	0.5	0.65	0.06	0.067	0.9	0.062
Engeletin	0.54	0.1	0.069	0.9	0.72	0.03	0.79	0.01	0.14	0.7	0.59	0.09	0.11	0.8	0.31	0.4	-0.23	0.5	-0.052	0.9	-0.16	0.7	-0.49	0.2	-0.85	0.004	-0.6	0.09	-0.4	0.3	0.013	1	-0.037	0.9	-0.36	0.3	-0.25	0.5	0.36	0.3	-0.04	0.9	-0.19	0.6	-0.29	0.5	0.25	0.5	-0.035
Eriocitrin	-0.41	0.3	0.12	0.8	-0.75	0.02	-0.64	0.06	-0.42	0.3	-0.59	0.1	-0.31	0.4	-0.33	0.4	0.37	0.3	0.1	0.8	0.41	0.3	0.59	0.1	0.88	0.002	0.66	0.05	0.29	0.5	-0.045	0.9	-0.022	1	0.41	0.3	0.35	0.4	-0.19	0.6	0.17	0.7	0.33	0.4	0.32	0.4	-0.078	0.8	0.13
Eriodictyol.C.hexoside	-0.58	0.1	0.072	0.9	-0.61	0.08	-0.48	0.2	-0.26	0.5	-0.28	0.5	-0.096	0.8	-0.13	0.7	0.34	0.4	0.4	0.3	0.46	0.2	0.7	0.04	0.93	0.0002	0.78	0.01	0.59	0.09	0.056	0.9	0.0058	1	0.47	0.2	0.2	0.6	-0.34	0.4	0.06	0.9	0.43	0.2	0.56	0.1	0.026	0.9	-0.12
Esculetin.O.quinacyl.esculetin.O.quinic.acid	-0.94	0.0002	-0.55	0.1	-0.6	0.09	-0.59	0.09	0.053	0.9	0.13	0.7	0.52	0.2	0.3	0.4	0.27	0.5	0.39	0.3	0.12	0.8	0.51	0.2	0.67	0.05	0.83	0.005	0.86	0.003	0.55	0.1	0.4	0.3	0.57	0.1	-0.095	0.8	-0.38	0.3	0.19	0.6	0.21	0.6	0.59	0.1	-0.017	1	0.16
Feruloyl.quinic.acid	-0.63	0.07	-0.072	0.9	-0.76	0.02	-0.67	0.05	-0.22	0.6	-0.43	0.2	-0.066	0.9	-0.17	0.7	0.31	0.4	0.22	0.6	0.3	0.4	0.61	0.08	0.92	0.0005	0.74	0.02	0.52	0.1	0.093	0.8	0.067	0.9	0.53	0.1	0.29	0.5	-0.32	0.4	0.14	0.7	0.3	0.4	0.48	0.2	-0.056	0.9	-0.033
Gallic.acid.O.Hexoside	-0.68	0.04	-0.2	0.6	-0.8	0.009	-0.78	0.01	-0.18	0.6	-0.43	0.2	0.018	1	-0.14	0.7	0.26	0.5	0.15	0.7	0.22	0.6	0.58	0.1	0.88	0.002	0.71	0.03	0.53	0.1	0.21	0.6	0.15	0.7	0.54	0.1	0.26	0.5	-0.31	0.4	0.2	0.6	0.23	0.5	0.44	0.2	-0.11	0.8	0.061
Gallocatechin.catechin	0.1	0.8	0.49	0.2	-0.53	0.1	-0.52	0.1	-0.54	0.1	-0.83	0.006	-0.72	0.03	-0.74	0.02	0.35	0.4	-0.11	0.8	0.48	0.2	0.52	0.2	0.7	0.04	0.23	0.6	-0.15	0.7	-0.26	0.5	-0.21	0.6	0.19	0.6	0.48	0.2	-0.13	0.7	0.066	0.9	0.1	0.8	-0.067	0.9	-0.19	0.6	0.091
Ginsenoside.Rg1	-0.93	0.0002	-0.75	0.02	-0.42	0.3	-0.48	0.2	0.25	0.5	0.34	0.4	0.77	0.02	0.57	0.1	0.06	0.9	0.28	0.5	-0.15	0.7	0.23	0.6	0.34	0.4	0.74	0.02	0.81	0.008	0.56	0.1	0.43	0.3	0.33	0.4	-0.35	0.4	-0.23	0.5	0.17	0.7	0.19	0.6	0.47	0.2	-0.063	0.9	0.31
Gluconic.acid	0.73	0.03	0.15	0.7	0.75	0.02	0.65	0.06	0.25	0.5	0.26	0.5	-0.063	0.9	0.043	0.9	-0.33	0.4	-0.35	0.4	-0.35	0.4	-0.59	0.1	-0.92	0.0004	-0.8	0.009	-0.66	0.06	-0.22	0.6	-0.23	0.6	-0.51	0.2	-0.18	0.6	0.32	0.4	-0.18	0.6	-0.39	0.3	-0.56	0.1	0.0045	1	-0.11
Glucose.1.phosphate	0.86	0.003	0.35	0.4	0.73	0.02	0.68	0.04	0.087	0.8	0.14	0.7	-0.27	0.5	-0.1	0.8	-0.26	0.5	-0.34	0.4	-0.2	0.6	-0.51	0.2	-0.84	0.005	-0.81	0.008	-0.75	0.02	-0.33	0.4	-0.32	0.4	-0.54	0.1	-0.089	0.8	0.35	0.4	-0.18	0.6	-0.32	0.4	-0.59	0.1	0.023	1	-0.11
Glutathione.oxidized	0.84	0.005	0.42	0.3	0.73	0.03	0.77	0.01	0.044	0.9	0.16	0.7	-0.29	0.4	-0.028	0.9	-0.23	0.6	-0.26	0.5	-0.16	0.7	-0.61	0.08	-0.79	0.01	-0.7	0.04	-0.73	0.03	-0.51	0.2	-0.34	0.4	-0.62	0.08	-0.12	0.8	0.39	0.3	-0.24	0.5	-0.13	0.7	-0.51	0.2	0.084	0.8	-0.086
Glutathione.reduced.form	-0.98	4e-06	-0.59	0.1	-0.57	0.1	-0.52	0.2	0.16	0.7	0.18	0.6	0.6	0.09	0.4	0.3	0.17	0.7	0.43	0.3	0.0029	1	0.35	0.4	0.63	0.07	0.8	0.01	0.9	0.001	0.45	0.2	0.42	0.3	0.53	0.1	-0.098	0.8	-0.37	0.3	0.13	0.7	0.28	0.5	0.67	0.05	0.04	0.9	0.04
Hydroxy.methoxycinnamate	-0.85	0.004	-0.37	0.3	-0.71	0.03	-0.66	0.05	-0.06	0.9	-0.14	0.7	0.29	0.4	0.13	0.7	0.28	0.5	0.31	0.4	0.16	0.7	0.49	0.2	0.8	0.01	0.86	0.003	0.73	0.03	0.27	0.5	0.26	0.5	0.48	0.2	0.023	1	-0.34	0.4	0.14	0.7	0.33	0.4	0.55	0.1	-0.068	0.9	0.16
Hyperoside	-0.69	0.04	-0.2	0.6	-0.82	0.006	-0.69	0.04	-0.24	0.5	-0.33	0.4	0.026	0.9	-0.088	0.8	0.29	0.4	0.24	0.5	0.3	0.4	0.65	0.06	0.88	0.002	0.66	0.05	0.57	0.1	0.36	0.3	0.22	0.6	0.74	0.02	0.39	0.3	-0.28	0.5	0.32	0.4	0.21	0.6	0.58	0.1	0.084	0.8	-0.072
Hypoxanthine	0.086	0.8	-0.39	0.3	0.62	0.07	0.58	0.1	0.52	0.2	0.75	0.02	0.6	0.09	0.62	0.07	-0.36	0.3	0.0038	1	-0.5	0.2	-0.59	0.1	-0.81	0.008	-0.39	0.3	-0.027	0.9	0.18	0.6	0.15	0.7	-0.28	0.5	-0.45	0.2	0.17	0.7	-0.1	0.8	-0.2	0.6	-0.093	0.8	0.15	0.7	-0.077
Hypoxanthine.9.D.arabinofuranoside	0.2	0.6	-0.32	0.4	0.67	0.05	0.61	0.08	0.49	0.2	0.71	0.03	0.51	0.2	0.55	0.1	-0.36	0.3	-0.049	0.9	-0.49	0.2	-0.62	0.08	-0.86	0.003	-0.47	0.2	-0.13	0.7	0.11	0.8	0.1	0.8	-0.35	0.4	-0.44	0.2	0.2	0.6	-0.13	0.7	-0.23	0.5	-0.18	0.6	0.12	0.8	-0.06
ihydroxy.trimethoxyflavone	-0.96	5e-05	-0.75	0.02	-0.35	0.4	-0.29	0.4	0.31	0.4	0.5	0.2	0.83	0.005	0.65	0.06	0.071	0.9	0.46	0.2	-0.15	0.7	0.13	0.7	0.33	0.4	0.66	0.05	0.9	0.001	0.57	0.1	0.53	0.1	0.45	0.2	-0.27	0.5	-0.3	0.4	0.13	0.7	0.2	0.6	0.64	0.06	0.12	0.8	0.062
Indole.3.carboxylic	0.069	0.9	-0.4	0.3	0.6	0.08	0.57	0.1	0.5	0.2	0.77	0.02	0.6	0.08	0.63	0.07	-0.34	0.4	0.019	1	-0.48	0.2	-0.58	0.1	-0.8	0.01	-0.38	0.3	-0.012	1	0.2	0.6	0.17	0.7	-0.26	0.5	-0.45	0.2	0.18	0.7	-0.082	0.8	-0.19	0.6	-0.078	0.8	0.16	0.7	-0.057
Indole.3.carboxylic.acid	0.1	0.8	-0.38	0.3	0.63	0.07	0.58	0.1	0.5	0.2	0.75	0.02	0.58	0.1	0.61	0.08	-0.36	0.3	0.0055	1	-0.49	0.2	-0.59	0.1	-0.81	0.008	-0.41	0.3	-0.035	0.9	0.18	0.6	0.15	0.7	-0.29	0.4	-0.45	0.2	0.18	0.6	-0.099	0.8	-0.2	0.6	-0.1	0.8	0.15	0.7	-0.065
Indole.5.carboxylic.acid	0.1	0.8	-0.39	0.3	0.63	0.07	0.57	0.1	0.53	0.1	0.74	0.02	0.59	0.1	0.59	0.1	-0.33	0.4	-0.0038	1	-0.5	0.2	-0.57	0.1	-0.81	0.007	-0.41	0.3	-0.035	0.9	0.19	0.6	0.15	0.7	-0.26	0.5	-0.45	0.2	0.14	0.7	-0.12	0.8	-0.26	0.5	-0.12	0.8	0.12	0.8	-0.091
Ionone	0.71	0.03	0.17	0.7	0.75	0.02	0.71	0.03	0.18	0.6	0.35	0.4	-0.055	0.9	0.087	0.8	-0.29	0.4	-0.25	0.5	-0.26	0.5	-0.55	0.1	-0.89	0.001	-0.78	0.01	-0.6	0.09	-0.16	0.7	-0.17	0.7	-0.47	0.2	-0.17	0.7	0.33	0.4	-0.14	0.7	-0.33	0.4	-0.48	0.2	0.092	0.8	-0.099
Isoacteoside	-0.77	0.01	-0.24	0.5	-0.75	0.02	-0.69	0.04	-0.17	0.7	-0.25	0.5	0.13	0.7	-0.023	1	0.33	0.4	0.31	0.4	0.28	0.5	0.6	0.09	0.89	0.001	0.81	0.008	0.67	0.05	0.27	0.5	0.23	0.5	0.56	0.1	0.16	0.7	-0.35	0.3	0.17	0.7	0.3	0.4	0.54	0.1	-0.044	0.9	0.092
Isorhamnetin.glucoside	-0.65	0.06	-0.07	0.9	-0.8	0.009	-0.66	0.05	-0.31	0.4	-0.38	0.3	-0.053	0.9	-0.08	0.8	0.22	0.6	0.27	0.5	0.35	0.4	0.55	0.1	0.93	0.0003	0.7	0.04	0.55	0.1	0.16	0.7	0.17	0.7	0.51	0.2	0.31	0.4	-0.19	0.6	0.26	0.5	0.45	0.2	0.57	0.1	0.057	0.9	0.038
Isorhamnetin.hexoside	-0.57	0.1	-0.033	0.9	-0.73	0.03	-0.73	0.02	-0.25	0.5	-0.49	0.2	-0.12	0.8	-0.28	0.5	0.35	0.4	0.17	0.7	0.33	0.4	0.63	0.07	0.91	0.0008	0.71	0.03	0.47	0.2	0.079	0.8	0.065	0.9	0.44	0.2	0.23	0.5	-0.36	0.3	0.092	0.8	0.24	0.5	0.35	0.4	-0.17	0.7	0.091
Isorhamnetin.hexoside.1	-0.58	0.1	-0.028	0.9	-0.74	0.02	-0.71	0.03	-0.28	0.5	-0.46	0.2	-0.11	0.8	-0.23	0.6	0.31	0.4	0.2	0.6	0.36	0.3	0.65	0.06	0.92	0.0005	0.72	0.03	0.49	0.2	0.12	0.8	0.066	0.9	0.46	0.2	0.25	0.5	-0.31	0.4	0.15	0.7	0.31	0.4	0.41	0.3	-0.11	0.8	0.072
Isorhamnetin.neohesperidoside	-0.47	0.2	0.059	0.9	-0.75	0.02	-0.73	0.03	-0.37	0.3	-0.55	0.1	-0.24	0.5	-0.37	0.3	0.37	0.3	0.15	0.7	0.41	0.3	0.64	0.06	0.91	0.0006	0.63	0.07	0.38	0.3	0.095	0.8	0.079	0.8	0.46	0.2	0.33	0.4	-0.3	0.4	0.16	0.7	0.23	0.5	0.31	0.4	-0.13	0.7	0.13
Isorhamnetin.O.acetyl.hexoside	-0.76	0.02	-0.26	0.5	-0.73	0.03	-0.71	0.03	-0.17	0.7	-0.25	0.5	0.15	0.7	-0.045	0.9	0.38	0.3	0.29	0.5	0.28	0.5	0.6	0.09	0.86	0.003	0.83	0.006	0.66	0.05	0.28	0.5	0.24	0.5	0.53	0.1	0.1	0.8	-0.38	0.3	0.15	0.7	0.25	0.5	0.47	0.2	-0.11	0.8	0.18
Isosakuranetin.neohesperidoside.Poncirin	-0.51	0.2	0.034	0.9	-0.78	0.01	-0.71	0.03	-0.34	0.4	-0.55	0.1	-0.21	0.6	-0.31	0.4	0.34	0.4	0.15	0.7	0.37	0.3	0.58	0.1	0.92	0.0005	0.65	0.06	0.4	0.3	0.047	0.9	0.079	0.8	0.45	0.2	0.33	0.4	-0.27	0.5	0.16	0.7	0.29	0.4	0.37	0.3	-0.098	0.8	0.096
Isoschaftoside	-0.89	0.001	-0.46	0.2	-0.72	0.03	-0.66	0.05	-0.02	1	-0.091	0.8	0.37	0.3	0.2	0.6	0.27	0.5	0.31	0.4	0.099	0.8	0.41	0.3	0.75	0.02	0.84	0.005	0.75	0.02	0.32	0.4	0.34	0.4	0.53	0.1	0.029	0.9	-0.33	0.4	0.17	0.7	0.29	0.4	0.57	0.1	-0.035	0.9	0.17
Kaempferol.3.O.robinobioside.Biorobin	0.083	0.8	0.49	0.2	-0.55	0.1	-0.51	0.2	-0.53	0.1	-0.83	0.006	-0.71	0.03	-0.71	0.03	0.32	0.4	-0.1	0.8	0.47	0.2	0.52	0.1	0.71	0.03	0.25	0.5	-0.14	0.7	-0.28	0.5	-0.24	0.5	0.21	0.6	0.5	0.2	-0.11	0.8	0.078	0.8	0.14	0.7	-0.021	1	-0.16	0.7	0.036
Kaempferol.3.O.rutinoside.Nicotiflorin	0.077	0.8	0.49	0.2	-0.55	0.1	-0.51	0.2	-0.55	0.1	-0.82	0.007	-0.71	0.03	-0.7	0.03	0.33	0.4	-0.1	0.8	0.49	0.2	0.53	0.1	0.71	0.03	0.26	0.5	-0.14	0.7	-0.26	0.5	-0.23	0.6	0.21	0.6	0.49	0.2	-0.1	0.8	0.091	0.8	0.15	0.7	-0.021	1	-0.16	0.7	0.063
Kaempferol.7.O.rhamnoside	-0.48	0.2	0.026	0.9	-0.76	0.02	-0.69	0.04	-0.3	0.4	-0.6	0.09	-0.21	0.6	-0.32	0.4	0.37	0.3	0.094	0.8	0.29	0.4	0.48	0.2	0.87	0.002	0.66	0.05	0.34	0.4	-0.082	0.8	0.033	0.9	0.4	0.3	0.31	0.4	-0.28	0.5	0.088	0.8	0.26	0.5	0.31	0.4	-0.15	0.7	0.11
L.Arginine	0.97	2e-05	0.73	0.03	0.55	0.1	0.63	0.07	-0.22	0.6	-0.21	0.6	-0.7	0.04	-0.42	0.3	-0.041	0.9	-0.3	0.4	0.12	0.8	-0.29	0.5	-0.49	0.2	-0.63	0.07	-0.85	0.004	-0.64	0.06	-0.53	0.1	-0.48	0.2	0.16	0.7	0.32	0.4	-0.22	0.6	-0.13	0.7	-0.54	0.1	0.04	0.9	-0.17
L.ascorbate	-0.49	0.2	0.026	0.9	-0.78	0.01	-0.74	0.02	-0.33	0.4	-0.58	0.1	-0.22	0.6	-0.33	0.4	0.31	0.4	0.1	0.8	0.35	0.4	0.63	0.07	0.9	0.0009	0.62	0.07	0.37	0.3	0.078	0.8	0.036	0.9	0.48	0.2	0.36	0.3	-0.26	0.5	0.19	0.6	0.24	0.5	0.35	0.4	-0.11	0.8	0.051
L.Asparagine	0.98	2e-06	0.67	0.05	0.48	0.2	0.41	0.3	-0.19	0.6	-0.37	0.3	-0.72	0.03	-0.56	0.1	-0.097	0.8	-0.47	0.2	0.036	0.9	-0.24	0.5	-0.5	0.2	-0.73	0.03	-0.92	0.0005	-0.55	0.1	-0.52	0.1	-0.49	0.2	0.18	0.6	0.29	0.4	-0.19	0.6	-0.3	0.4	-0.69	0.04	-0.13	0.7	-0.09
L.Cysteine	-0.95	8e-05	-0.59	0.09	-0.63	0.07	-0.63	0.07	0.15	0.7	0.032	0.9	0.54	0.1	0.33	0.4	0.16	0.7	0.28	0.5	-0.044	0.9	0.36	0.3	0.63	0.07	0.82	0.007	0.8	0.009	0.38	0.3	0.33	0.4	0.47	0.2	-0.1	0.8	-0.34	0.4	0.14	0.7	0.24	0.5	0.56	0.1	-0.077	0.8	0.14
L.Dencichin	-0.47	0.2	0.094	0.8	-0.75	0.02	-0.65	0.06	-0.36	0.3	-0.55	0.1	-0.26	0.5	-0.35	0.4	0.4	0.3	0.19	0.6	0.42	0.3	0.63	0.07	0.93	0.0003	0.65	0.06	0.38	0.3	0.02	1	0.042	0.9	0.51	0.2	0.38	0.3	-0.31	0.4	0.13	0.7	0.26	0.5	0.38	0.3	-0.061	0.9	0.01
L.Gulonic.lactone	-0.9	0.0008	-0.43	0.2	-0.71	0.03	-0.61	0.08	-0.04	0.9	-0.028	0.9	0.36	0.3	0.19	0.6	0.3	0.4	0.38	0.3	0.18	0.6	0.53	0.1	0.79	0.01	0.83	0.005	0.81	0.009	0.43	0.3	0.35	0.4	0.64	0.06	0.078	0.8	-0.37	0.3	0.2	0.6	0.26	0.5	0.64	0.06	0.039	0.9	0.054
L.Homocystine	0.29	0.5	-0.24	0.5	0.75	0.02	0.64	0.07	0.54	0.1	0.65	0.06	0.44	0.2	0.4	0.3	-0.3	0.4	-0.068	0.9	-0.48	0.2	-0.55	0.1	-0.86	0.003	-0.52	0.1	-0.18	0.7	0.056	0.9	0.0057	1	-0.34	0.4	-0.43	0.3	0.078	0.8	-0.25	0.5	-0.37	0.3	-0.27	0.5	0.038	0.9	-0.18
Luteolin	-0.49	0.2	0.03	0.9	-0.75	0.02	-0.73	0.02	-0.33	0.4	-0.56	0.1	-0.21	0.6	-0.35	0.4	0.38	0.3	0.13	0.7	0.36	0.3	0.59	0.09	0.9	0.001	0.67	0.05	0.38	0.3	0.038	0.9	0.068	0.9	0.41	0.3	0.28	0.5	-0.31	0.4	0.12	0.8	0.24	0.5	0.29	0.4	-0.17	0.7	0.16
Luteolin.8.C.hexosyl.O.hexoside	0.95	0.0001	0.59	0.09	0.51	0.2	0.42	0.3	-0.093	0.8	-0.28	0.5	-0.63	0.07	-0.47	0.2	-0.26	0.5	-0.46	0.2	-0.045	0.9	-0.26	0.5	-0.55	0.1	-0.84	0.005	-0.87	0.002	-0.44	0.2	-0.49	0.2	-0.45	0.2	0.2	0.6	0.31	0.4	-0.14	0.7	-0.31	0.4	-0.62	0.08	-0.061	0.9	-0.24
Luteolin.C.hexosyl.O.rhamnoside.O.hexoside	-0.22	0.6	0.27	0.5	-0.68	0.04	-0.66	0.05	-0.47	0.2	-0.7	0.03	-0.47	0.2	-0.54	0.1	0.33	0.4	0.031	0.9	0.46	0.2	0.62	0.08	0.85	0.003	0.47	0.2	0.15	0.7	-0.068	0.9	-0.067	0.9	0.33	0.4	0.41	0.3	-0.2	0.6	0.14	0.7	0.22	0.6	0.17	0.7	-0.15	0.7	0.11
Luteolin.O.hexosyl.O.pentoside	0.77	0.02	0.34	0.4	0.43	0.2	0.51	0.2	-0.17	0.7	0.021	1	-0.35	0.4	0.062	0.9	-0.54	0.1	-0.44	0.2	-0.14	0.7	-0.52	0.2	-0.72	0.03	-0.8	0.01	-0.8	0.01	-0.23	0.5	-0.27	0.5	-0.53	0.1	0.088	0.8	0.75	0.02	0.23	0.6	0.04	0.9	-0.42	0.3	0.22	0.6	0.048
LysoPC.14.0	0.71	0.03	0.15	0.7	0.75	0.02	0.69	0.04	0.22	0.6	0.33	0.4	-0.038	0.9	0.1	0.8	-0.33	0.4	-0.29	0.5	-0.31	0.4	-0.57	0.1	-0.91	0.0005	-0.78	0.01	-0.62	0.08	-0.18	0.7	-0.2	0.6	-0.5	0.2	-0.19	0.6	0.34	0.4	-0.15	0.7	-0.34	0.4	-0.5	0.2	0.065	0.9	-0.1
LysoPC.14.0.2n.isomer	0.71	0.03	0.16	0.7	0.74	0.02	0.7	0.04	0.19	0.6	0.33	0.4	-0.055	0.9	0.099	0.8	-0.32	0.4	-0.28	0.5	-0.3	0.4	-0.59	0.09	-0.91	0.0007	-0.78	0.01	-0.63	0.07	-0.19	0.6	-0.18	0.6	-0.5	0.2	-0.18	0.7	0.36	0.3	-0.14	0.7	-0.32	0.4	-0.5	0.2	0.081	0.8	-0.082
LysoPC.15.0	0.57	0.1	0.0069	1	0.74	0.02	0.7	0.04	0.29	0.4	0.46	0.2	0.13	0.7	0.25	0.5	-0.35	0.4	-0.22	0.6	-0.38	0.3	-0.64	0.06	-0.93	0.0003	-0.72	0.03	-0.49	0.2	-0.1	0.8	-0.091	0.8	-0.46	0.2	-0.25	0.5	0.33	0.4	-0.13	0.7	-0.3	0.4	-0.4	0.3	0.11	0.8	-0.09
LysoPC.15.1	0.73	0.02	0.18	0.6	0.75	0.02	0.69	0.04	0.19	0.6	0.3	0.4	-0.078	0.8	0.063	0.9	-0.33	0.4	-0.3	0.4	-0.29	0.4	-0.58	0.1	-0.9	0.0009	-0.8	0.009	-0.64	0.06	-0.2	0.6	-0.2	0.6	-0.51	0.2	-0.17	0.7	0.35	0.4	-0.15	0.7	-0.33	0.4	-0.52	0.2	0.059	0.9	-0.097
LysoPC.16.0	0.5	0.2	-0.056	0.9	0.72	0.03	0.7	0.03	0.32	0.4	0.52	0.2	0.2	0.6	0.32	0.4	-0.34	0.4	-0.17	0.7	-0.4	0.3	-0.67	0.05	-0.91	0.0006	-0.68	0.04	-0.42	0.3	-0.063	0.9	-0.024	1	-0.41	0.3	-0.26	0.5	0.3	0.4	-0.12	0.8	-0.28	0.5	-0.34	0.4	0.14	0.7	-0.1
LysoPC.16.0.2n.isomer	0.51	0.2	-0.052	0.9	0.73	0.03	0.7	0.04	0.34	0.4	0.51	0.2	0.2	0.6	0.3	0.4	-0.33	0.4	-0.18	0.6	-0.41	0.3	-0.67	0.05	-0.92	0.0005	-0.68	0.04	-0.43	0.3	-0.081	0.8	-0.035	0.9	-0.43	0.2	-0.28	0.5	0.29	0.5	-0.15	0.7	-0.3	0.4	-0.36	0.3	0.12	0.8	-0.09
LysoPC.16.1	0.36	0.3	-0.18	0.6	0.71	0.03	0.67	0.05	0.41	0.3	0.63	0.07	0.36	0.3	0.44	0.2	-0.36	0.3	-0.1	0.8	-0.44	0.2	-0.62	0.07	-0.9	0.001	-0.59	0.1	-0.27	0.5	0.046	0.9	0.031	0.9	-0.38	0.3	-0.36	0.3	0.25	0.5	-0.12	0.8	-0.27	0.5	-0.27	0.5	0.13	0.7	-0.085
LysoPC.17.0	0.53	0.1	-0.018	1	0.73	0.02	0.72	0.03	0.33	0.4	0.48	0.2	0.16	0.7	0.28	0.5	-0.33	0.4	-0.19	0.6	-0.4	0.3	-0.65	0.06	-0.92	0.0005	-0.69	0.04	-0.46	0.2	-0.11	0.8	-0.086	0.8	-0.41	0.3	-0.24	0.5	0.29	0.4	-0.15	0.7	-0.31	0.4	-0.36	0.3	0.13	0.7	-0.15
LysoPC.18.0	0.5	0.2	-0.059	0.9	0.73	0.03	0.7	0.04	0.35	0.3	0.5	0.2	0.2	0.6	0.3	0.4	-0.33	0.4	-0.19	0.6	-0.42	0.3	-0.66	0.06	-0.92	0.0005	-0.68	0.04	-0.43	0.3	-0.083	0.8	-0.054	0.9	-0.41	0.3	-0.26	0.5	0.27	0.5	-0.16	0.7	-0.32	0.4	-0.36	0.3	0.12	0.8	-0.13
LysoPC.18.1	0.63	0.07	0.036	0.9	0.73	0.02	0.65	0.06	0.29	0.5	0.37	0.3	0.062	0.9	0.17	0.7	-0.37	0.3	-0.32	0.4	-0.39	0.3	-0.6	0.09	-0.94	0.0001	-0.76	0.02	-0.57	0.1	-0.11	0.8	-0.16	0.7	-0.47	0.2	-0.22	0.6	0.34	0.4	-0.12	0.8	-0.37	0.3	-0.49	0.2	0.047	0.9	-0.087
LysoPC.18.2	0.78	0.01	0.25	0.5	0.73	0.02	0.69	0.04	0.13	0.7	0.26	0.5	-0.15	0.7	0.023	1	-0.32	0.4	-0.31	0.4	-0.24	0.5	-0.54	0.1	-0.88	0.002	-0.8	0.009	-0.69	0.04	-0.23	0.6	-0.24	0.5	-0.51	0.2	-0.13	0.7	0.38	0.3	-0.12	0.8	-0.3	0.4	-0.53	0.1	0.076	0.8	-0.086
LysoPC.18.3	0.48	0.2	-0.093	0.8	0.71	0.03	0.69	0.04	0.34	0.4	0.52	0.2	0.23	0.6	0.35	0.4	-0.34	0.4	-0.19	0.6	-0.42	0.3	-0.64	0.06	-0.93	0.0003	-0.65	0.06	-0.42	0.3	-0.044	0.9	-0.052	0.9	-0.39	0.3	-0.27	0.5	0.31	0.4	-0.11	0.8	-0.3	0.4	-0.34	0.4	0.14	0.7	-0.1
LysoPC.20.1	0.45	0.2	-0.11	0.8	0.72	0.03	0.66	0.05	0.38	0.3	0.54	0.1	0.27	0.5	0.34	0.4	-0.38	0.3	-0.16	0.7	-0.43	0.2	-0.64	0.06	-0.91	0.0006	-0.68	0.04	-0.37	0.3	0.004	1	0.0029	1	-0.41	0.3	-0.29	0.4	0.27	0.5	-0.12	0.8	-0.31	0.4	-0.33	0.4	0.12	0.8	-0.11
LysoPE.14.0	0.64	0.06	0.088	0.8	0.76	0.02	0.72	0.03	0.27	0.5	0.4	0.3	0.042	0.9	0.16	0.7	-0.3	0.4	-0.24	0.5	-0.33	0.4	-0.6	0.09	-0.92	0.0005	-0.74	0.02	-0.55	0.1	-0.16	0.7	-0.15	0.7	-0.47	0.2	-0.23	0.6	0.3	0.4	-0.17	0.7	-0.33	0.4	-0.46	0.2	0.08	0.8	-0.11
LysoPE.14.0.2n.isomer	0.62	0.07	0.07	0.9	0.73	0.03	0.72	0.03	0.22	0.6	0.42	0.3	0.053	0.9	0.22	0.6	-0.32	0.4	-0.23	0.6	-0.32	0.4	-0.62	0.07	-0.92	0.0005	-0.73	0.03	-0.54	0.1	-0.12	0.7	-0.11	0.8	-0.45	0.2	-0.2	0.6	0.37	0.3	-0.1	0.8	-0.28	0.5	-0.42	0.3	0.14	0.7	-0.078
LysoPE.16.0	0.5	0.2	-0.063	0.9	0.74	0.02	0.7	0.03	0.35	0.4	0.52	0.2	0.21	0.6	0.3	0.4	-0.3	0.4	-0.17	0.7	-0.4	0.3	-0.64	0.06	-0.92	0.0004	-0.65	0.06	-0.42	0.3	-0.068	0.9	-0.048	0.9	-0.41	0.3	-0.29	0.5	0.26	0.5	-0.16	0.7	-0.32	0.4	-0.37	0.3	0.11	0.8	-0.098
LysoPE.16.0.2n.isomer	0.46	0.2	-0.1	0.8	0.71	0.03	0.69	0.04	0.36	0.3	0.53	0.1	0.24	0.5	0.33	0.4	-0.3	0.4	-0.17	0.7	-0.42	0.3	-0.65	0.06	-0.92	0.0004	-0.64	0.06	-0.4	0.3	-0.045	0.9	-0.019	1	-0.39	0.3	-0.28	0.5	0.27	0.5	-0.14	0.7	-0.33	0.4	-0.35	0.4	0.12	0.8	-0.085
LysoPE.18.0	0.47	0.2	-0.076	0.8	0.73	0.02	0.72	0.03	0.36	0.3	0.54	0.1	0.23	0.6	0.3	0.4	-0.25	0.5	-0.14	0.7	-0.39	0.3	-0.62	0.08	-0.9	0.0008	-0.62	0.07	-0.38	0.3	-0.057	0.9	-0.034	0.9	-0.36	0.3	-0.29	0.5	0.22	0.6	-0.18	0.6	-0.34	0.4	-0.34	0.4	0.12	0.8	-0.12
LysoPE.18.2.2n.isomer	0.81	0.009	0.27	0.5	0.74	0.02	0.67	0.05	0.12	0.7	0.21	0.6	-0.19	0.6	-0.064	0.9	-0.24	0.5	-0.32	0.4	-0.22	0.6	-0.54	0.1	-0.87	0.002	-0.8	0.009	-0.7	0.03	-0.25	0.5	-0.23	0.6	-0.52	0.2	-0.14	0.7	0.31	0.4	-0.18	0.6	-0.37	0.3	-0.59	0.09	0.014	1	-0.052
MAG.18.4.isomer2	0.82	0.007	0.26	0.5	0.67	0.05	0.63	0.07	0.096	0.8	0.14	0.7	-0.22	0.6	-0.045	0.9	-0.29	0.5	-0.41	0.3	-0.26	0.5	-0.55	0.1	-0.88	0.002	-0.81	0.008	-0.78	0.01	-0.28	0.5	-0.29	0.5	-0.5	0.2	-0.067	0.9	0.41	0.3	-0.1	0.8	-0.35	0.4	-0.59	0.09	0.038	0.9	-0.059
MAG.isomer3	0.12	0.8	-0.37	0.3	0.65	0.06	0.58	0.1	0.53	0.1	0.74	0.02	0.58	0.1	0.58	0.1	-0.35	0.4	-0.0087	1	-0.5	0.2	-0.59	0.1	-0.82	0.007	-0.42	0.3	-0.047	0.9	0.15	0.7	0.13	0.7	-0.31	0.4	-0.46	0.2	0.14	0.7	-0.14	0.7	-0.24	0.5	-0.13	0.7	0.11	0.8	-0.09
Methyl.ferulate	-0.87	0.002	-0.4	0.3	-0.56	0.1	-0.63	0.07	0.062	0.9	-0.019	1	0.4	0.3	0.14	0.7	0.28	0.5	0.38	0.3	0.14	0.7	0.49	0.2	0.76	0.02	0.85	0.003	0.83	0.006	0.31	0.4	0.3	0.4	0.38	0.3	-0.15	0.7	-0.47	0.2	0.0043	1	0.27	0.5	0.49	0.2	-0.17	0.7	0.17
MethylCoumarin	-0.99	9e-07	-0.69	0.04	-0.45	0.2	-0.42	0.3	0.26	0.5	0.35	0.4	0.74	0.02	0.54	0.1	0.1	0.8	0.44	0.2	-0.091	0.8	0.24	0.5	0.48	0.2	0.74	0.02	0.91	0.0006	0.51	0.2	0.47	0.2	0.47	0.2	-0.22	0.6	-0.34	0.4	0.12	0.8	0.25	0.5	0.65	0.06	0.06	0.9	0.065
N.Feruloyl.putrescine	-0.98	7e-06	-0.73	0.03	-0.41	0.3	-0.43	0.2	0.29	0.4	0.4	0.3	0.79	0.01	0.53	0.1	0.094	0.8	0.44	0.2	-0.12	0.8	0.22	0.6	0.43	0.3	0.67	0.05	0.92	0.0005	0.59	0.09	0.54	0.1	0.46	0.2	-0.24	0.5	-0.37	0.3	0.12	0.8	0.16	0.7	0.61	0.08	0.034	0.9	0.093
N.Feruloyl.putrescine.1	-0.96	3e-05	-0.72	0.03	-0.4	0.3	-0.48	0.2	0.33	0.4	0.34	0.4	0.78	0.01	0.5	0.2	0.03	0.9	0.39	0.3	-0.16	0.7	0.19	0.6	0.42	0.3	0.64	0.06	0.9	0.0009	0.55	0.1	0.51	0.2	0.38	0.3	-0.28	0.5	-0.38	0.3	0.082	0.8	0.16	0.7	0.56	0.1	-0.041	0.9	0.1
N.Feruloyl.tyramine	-0.98	2e-06	-0.71	0.03	-0.44	0.2	-0.4	0.3	0.27	0.5	0.39	0.3	0.77	0.02	0.64	0.07	-0.024	1	0.39	0.3	-0.13	0.7	0.23	0.5	0.42	0.3	0.7	0.03	0.89	0.001	0.55	0.1	0.43	0.3	0.44	0.2	-0.22	0.6	-0.23	0.6	0.2	0.6	0.3	0.4	0.68	0.04	0.11	0.8	0.033
N.Formylkynurenine	0.4	0.3	-0.15	0.7	0.71	0.03	0.66	0.05	0.39	0.3	0.58	0.1	0.31	0.4	0.42	0.3	-0.41	0.3	-0.16	0.7	-0.45	0.2	-0.62	0.08	-0.92	0.0005	-0.64	0.07	-0.33	0.4	0.032	0.9	-0.017	1	-0.4	0.3	-0.33	0.4	0.31	0.4	-0.089	0.8	-0.26	0.5	-0.29	0.4	0.13	0.7	-0.11
N.Glycyl.L.leucine	0.15	0.7	-0.35	0.4	0.64	0.06	0.59	0.09	0.49	0.2	0.73	0.03	0.54	0.1	0.58	0.1	-0.37	0.3	-0.025	0.9	-0.49	0.2	-0.6	0.09	-0.84	0.005	-0.46	0.2	-0.087	0.8	0.16	0.7	0.13	0.7	-0.31	0.4	-0.43	0.3	0.19	0.6	-0.099	0.8	-0.23	0.6	-0.14	0.7	0.14	0.7	-0.075
N.hydroxy.tryptamine	-0.71	0.03	-0.21	0.6	-0.73	0.03	-0.75	0.02	-0.16	0.7	-0.32	0.4	0.077	0.8	-0.18	0.6	0.4	0.3	0.26	0.5	0.29	0.5	0.65	0.06	0.88	0.002	0.75	0.02	0.63	0.07	0.29	0.4	0.23	0.5	0.56	0.1	0.17	0.7	-0.46	0.2	0.11	0.8	0.14	0.7	0.42	0.3	-0.15	0.7	0.11
N.Lauryldiethanolamine	-0.56	0.1	0.0072	1	-0.76	0.02	-0.69	0.04	-0.3	0.4	-0.49	0.2	-0.16	0.7	-0.28	0.5	0.36	0.3	0.22	0.6	0.37	0.3	0.61	0.08	0.94	0.0002	0.69	0.04	0.47	0.2	0.079	0.8	0.099	0.8	0.5	0.2	0.31	0.4	-0.33	0.4	0.13	0.7	0.28	0.5	0.42	0.3	-0.083	0.8	0.044
N.N.N.p.coumaroyl.cinnamoyl.caffeoyl.spermidine	0.89	0.001	0.4	0.3	0.71	0.03	0.63	0.07	0.053	0.9	0.057	0.9	-0.34	0.4	-0.18	0.6	-0.28	0.5	-0.39	0.3	-0.18	0.6	-0.48	0.2	-0.81	0.008	-0.83	0.005	-0.8	0.01	-0.36	0.3	-0.36	0.3	-0.57	0.1	-0.059	0.9	0.36	0.3	-0.17	0.7	-0.32	0.4	-0.63	0.07	-0.017	1	-0.094
N.N.p.coumaroyl.feruloyl.putrescine	-0.96	5e-05	-0.52	0.2	-0.51	0.2	-0.48	0.2	0.15	0.7	0.21	0.6	0.57	0.1	0.36	0.3	0.22	0.6	0.49	0.2	0.08	0.8	0.43	0.2	0.67	0.05	0.83	0.005	0.93	0.0003	0.44	0.2	0.38	0.3	0.51	0.2	-0.14	0.7	-0.43	0.2	0.067	0.9	0.28	0.5	0.67	0.05	0.015	1	0.017
N.p.Coumaroyl.agmatine	-0.99	8e-07	-0.68	0.04	-0.46	0.2	-0.43	0.2	0.24	0.5	0.34	0.4	0.73	0.03	0.53	0.1	0.11	0.8	0.44	0.2	-0.079	0.8	0.25	0.5	0.49	0.2	0.75	0.02	0.91	0.0006	0.51	0.2	0.47	0.2	0.47	0.2	-0.21	0.6	-0.34	0.4	0.12	0.8	0.25	0.5	0.65	0.06	0.055	0.9	0.073
N.p.Coumaroyl.agmatine.1	-0.99	1e-06	-0.68	0.04	-0.45	0.2	-0.42	0.3	0.25	0.5	0.35	0.4	0.74	0.02	0.54	0.1	0.11	0.8	0.44	0.2	-0.086	0.8	0.24	0.5	0.48	0.2	0.74	0.02	0.91	0.0006	0.51	0.2	0.47	0.2	0.46	0.2	-0.22	0.6	-0.34	0.4	0.12	0.8	0.25	0.5	0.65	0.06	0.056	0.9	0.071
N.p.Coumaroyl.putrescine	-0.99	5e-07	-0.7	0.04	-0.47	0.2	-0.44	0.2	0.25	0.5	0.33	0.4	0.74	0.02	0.54	0.1	0.1	0.8	0.41	0.3	-0.095	0.8	0.25	0.5	0.48	0.2	0.75	0.02	0.9	0.0008	0.52	0.2	0.46	0.2	0.47	0.2	-0.22	0.6	-0.33	0.4	0.13	0.7	0.24	0.5	0.64	0.06	0.043	0.9	0.09
N.p.Coumaroyl.putrescine.1	-0.98	2e-06	-0.67	0.05	-0.45	0.2	-0.41	0.3	0.25	0.5	0.35	0.4	0.73	0.02	0.55	0.1	0.094	0.8	0.45	0.2	-0.079	0.8	0.23	0.6	0.48	0.2	0.74	0.02	0.92	0.0005	0.5	0.2	0.47	0.2	0.45	0.2	-0.22	0.6	-0.33	0.4	0.12	0.8	0.28	0.5	0.66	0.05	0.066	0.9	0.073
N.sinapoyl.hydroxycoumarin	-0.78	0.01	-0.22	0.6	-0.6	0.09	-0.58	0.1	-0.026	0.9	-0.17	0.7	0.21	0.6	0.058	0.9	0.27	0.5	0.36	0.3	0.2	0.6	0.48	0.2	0.83	0.005	0.85	0.004	0.72	0.03	0.088	0.8	0.15	0.7	0.36	0.3	-0.017	1	-0.4	0.3	-0.018	1	0.39	0.3	0.53	0.1	-0.11	0.8	0.043
Nandrolone	0.61	0.08	0.056	0.9	0.76	0.02	0.71	0.03	0.27	0.5	0.44	0.2	0.083	0.8	0.21	0.6	-0.35	0.4	-0.22	0.6	-0.35	0.4	-0.61	0.08	-0.92	0.0004	-0.73	0.02	-0.52	0.2	-0.12	0.8	-0.12	0.8	-0.48	0.2	-0.25	0.5	0.33	0.4	-0.14	0.7	-0.3	0.4	-0.43	0.3	0.098	0.8	-0.095
Narcissoside	-0.56	0.1	0.017	1	-0.76	0.02	-0.67	0.05	-0.34	0.4	-0.46	0.2	-0.16	0.7	-0.26	0.5	0.39	0.3	0.25	0.5	0.4	0.3	0.6	0.09	0.94	0.0002	0.71	0.03	0.48	0.2	0.074	0.8	0.13	0.7	0.49	0.2	0.3	0.4	-0.31	0.4	0.14	0.7	0.32	0.4	0.43	0.3	-0.06	0.9	0.096
Neochlorogenic.acid.Caffeoylquinic.acid	-0.84	0.005	-0.35	0.3	-0.76	0.02	-0.73	0.03	-0.091	0.8	-0.21	0.6	0.24	0.5	0.065	0.9	0.26	0.5	0.27	0.5	0.18	0.7	0.52	0.1	0.83	0.005	0.8	0.01	0.71	0.03	0.32	0.4	0.28	0.5	0.54	0.1	0.11	0.8	-0.34	0.4	0.19	0.6	0.28	0.5	0.54	0.1	-0.064	0.9	0.13
Nicotinic.acid	0.21	0.6	-0.29	0.5	0.66	0.05	0.63	0.07	0.45	0.2	0.71	0.03	0.48	0.2	0.56	0.1	-0.39	0.3	-0.041	0.9	-0.46	0.2	-0.61	0.08	-0.85	0.003	-0.5	0.2	-0.14	0.7	0.12	0.8	0.096	0.8	-0.33	0.4	-0.4	0.3	0.24	0.5	-0.089	0.8	-0.2	0.6	-0.15	0.7	0.17	0.7	-0.093
Nicotinic.acid.hexoside	0.34	0.4	-0.2	0.6	0.69	0.04	0.67	0.05	0.39	0.3	0.63	0.07	0.37	0.3	0.47	0.2	-0.34	0.4	-0.11	0.8	-0.44	0.2	-0.65	0.06	-0.9	0.0009	-0.55	0.1	-0.28	0.5	0.024	1	0.036	0.9	-0.38	0.3	-0.36	0.3	0.28	0.5	-0.11	0.8	-0.24	0.5	-0.26	0.5	0.15	0.7	-0.047
Nobiletin	-0.0012	1	-0.43	0.2	0.6	0.09	0.57	0.1	0.52	0.1	0.81	0.009	0.65	0.06	0.65	0.06	-0.28	0.5	0.096	0.8	-0.46	0.2	-0.56	0.1	-0.74	0.02	-0.29	0.4	0.077	0.8	0.21	0.6	0.21	0.6	-0.23	0.6	-0.48	0.2	0.097	0.8	-0.13	0.7	-0.18	0.6	-0.028	0.9	0.15	0.7	-0.063
O.Caffeoyl.maltotriose	0.98	5e-06	0.61	0.08	0.53	0.1	0.54	0.1	-0.19	0.6	-0.2	0.6	-0.63	0.07	-0.4	0.3	-0.16	0.7	-0.41	0.3	0.023	1	-0.33	0.4	-0.6	0.09	-0.79	0.01	-0.9	0.0009	-0.46	0.2	-0.43	0.2	-0.47	0.2	0.17	0.7	0.39	0.3	-0.1	0.8	-0.25	0.5	-0.62	0.08	0.022	1	-0.095
O.Feruloyl.4.hydroxylcoumarin	-0.96	6e-05	-0.51	0.2	-0.61	0.08	-0.55	0.1	0.053	0.9	0.13	0.7	0.51	0.2	0.33	0.4	0.2	0.6	0.45	0.2	0.1	0.8	0.4	0.3	0.71	0.03	0.81	0.008	0.89	0.001	0.45	0.2	0.44	0.2	0.53	0.1	-0.06	0.9	-0.36	0.3	0.16	0.7	0.33	0.4	0.67	0.05	0.049	0.9	0.093
O.Feruloyl.quinic.acid	-0.46	0.2	0.11	0.8	-0.73	0.02	-0.69	0.04	-0.4	0.3	-0.51	0.2	-0.25	0.5	-0.34	0.4	0.31	0.4	0.2	0.6	0.46	0.2	0.66	0.05	0.94	0.0002	0.61	0.08	0.41	0.3	0.11	0.8	0.086	0.8	0.43	0.2	0.33	0.4	-0.26	0.5	0.19	0.6	0.32	0.4	0.37	0.3	-0.076	0.8	0.093
O.methylChrysoeriol.8.C.hexoside	-0.99	6e-07	-0.68	0.04	-0.51	0.2	-0.49	0.2	0.22	0.6	0.28	0.5	0.7	0.04	0.54	0.1	0.042	0.9	0.37	0.3	-0.089	0.8	0.28	0.5	0.5	0.2	0.76	0.02	0.88	0.002	0.51	0.2	0.42	0.3	0.45	0.2	-0.2	0.6	-0.26	0.5	0.19	0.6	0.3	0.4	0.65	0.06	0.045	0.9	0.1
O.Phosphorylethanolamine	0.53	0.1	0.056	0.9	0.68	0.04	0.76	0.02	0.12	0.8	0.56	0.1	0.11	0.8	0.39	0.3	-0.38	0.3	-0.096	0.8	-0.23	0.6	-0.62	0.08	-0.86	0.003	-0.64	0.06	-0.43	0.2	-0.04	0.9	-0.014	1	-0.45	0.2	-0.23	0.5	0.48	0.2	0.024	1	-0.053	0.9	-0.25	0.5	0.29	0.5	0.0052
p.Coumaroyl.shikimic.acid	-0.81	0.008	-0.29	0.4	-0.71	0.03	-0.68	0.04	-0.096	0.8	-0.2	0.6	0.22	0.6	0.041	0.9	0.31	0.4	0.32	0.4	0.21	0.6	0.5	0.2	0.84	0.004	0.84	0.005	0.71	0.03	0.23	0.6	0.26	0.5	0.47	0.2	0.054	0.9	-0.37	0.3	0.11	0.8	0.32	0.4	0.52	0.2	-0.092	0.8	0.15
p.Coumaroyl.shikimic.acid.1	-0.73	0.02	-0.16	0.7	-0.68	0.04	-0.66	0.05	-0.18	0.6	-0.24	0.5	0.098	0.8	-0.076	0.8	0.34	0.4	0.36	0.3	0.34	0.4	0.61	0.08	0.91	0.0007	0.81	0.008	0.69	0.04	0.22	0.6	0.21	0.6	0.46	0.2	0.09	0.8	-0.41	0.3	0.089	0.8	0.33	0.4	0.5	0.2	-0.094	0.8	0.12
p.Coumaryl.alcohol	-0.18	0.6	0.3	0.4	-0.67	0.05	-0.6	0.08	-0.45	0.2	-0.73	0.02	-0.51	0.2	-0.56	0.1	0.38	0.3	0.0028	1	0.44	0.2	0.61	0.08	0.83	0.006	0.48	0.2	0.095	0.8	-0.15	0.7	-0.15	0.7	0.37	0.3	0.45	0.2	-0.21	0.6	0.1	0.8	0.18	0.6	0.15	0.7	-0.14	0.7	0.029
Pantothenol	0.54	0.1	-0.0035	1	0.76	0.02	0.74	0.02	0.31	0.4	0.52	0.2	0.16	0.7	0.27	0.5	-0.26	0.5	-0.15	0.7	-0.35	0.4	-0.61	0.08	-0.91	0.0007	-0.65	0.06	-0.43	0.2	-0.098	0.8	-0.069	0.9	-0.42	0.3	-0.28	0.5	0.26	0.5	-0.18	0.6	-0.31	0.4	-0.38	0.3	0.12	0.8	-0.094
Parthenolide	0.11	0.8	0.45	0.2	-0.42	0.3	-0.19	0.6	-0.42	0.3	-0.64	0.06	-0.64	0.06	-0.45	0.2	0.22	0.6	-0.12	0.8	0.37	0.3	0.54	0.1	0.52	0.2	0.24	0.5	-0.2	0.6	-0.3	0.4	-0.48	0.2	0.37	0.3	0.58	0.1	0.035	0.9	0.14	0.7	0.15	0.7	0.15	0.7	0.093	0.8	-0.35
Peonidin.feruloylsophoroside.glucoside.	-0.57	0.1	-0.059	0.9	-0.64	0.06	-0.65	0.06	-0.1	0.8	-0.47	0.2	-0.059	0.9	-0.2	0.6	0.32	0.4	0.12	0.8	0.2	0.6	0.56	0.1	0.83	0.006	0.78	0.01	0.46	0.2	-0.087	0.8	-0.097	0.8	0.35	0.4	0.13	0.7	-0.37	0.3	-0.039	0.9	0.26	0.5	0.33	0.4	-0.23	0.5	0.0013
Phellodensin.F	-0.79	0.01	-0.28	0.5	-0.79	0.01	-0.72	0.03	-0.16	0.7	-0.28	0.5	0.15	0.7	0.02	1	0.27	0.5	0.25	0.5	0.22	0.6	0.54	0.1	0.86	0.003	0.79	0.01	0.65	0.06	0.27	0.5	0.23	0.6	0.54	0.1	0.17	0.7	-0.29	0.4	0.22	0.6	0.32	0.4	0.54	0.1	-0.041	0.9	0.12
Phenethylamine	-0.97	1e-05	-0.58	0.1	-0.62	0.07	-0.59	0.1	0.11	0.8	0.11	0.8	0.55	0.1	0.35	0.4	0.19	0.6	0.37	0.3	0.022	1	0.39	0.3	0.66	0.05	0.82	0.007	0.86	0.003	0.46	0.2	0.4	0.3	0.54	0.1	-0.076	0.8	-0.36	0.3	0.16	0.7	0.26	0.5	0.63	0.07	0.0027	1	0.099
Phloretin	0.48	0.2	-0.072	0.9	0.75	0.02	0.7	0.04	0.35	0.4	0.55	0.1	0.24	0.5	0.33	0.4	-0.34	0.4	-0.16	0.7	-0.4	0.3	-0.63	0.07	-0.92	0.0004	-0.65	0.06	-0.39	0.3	-0.039	0.9	-0.037	0.9	-0.44	0.2	-0.32	0.4	0.28	0.5	-0.15	0.7	-0.29	0.4	-0.36	0.3	0.11	0.8	-0.078
Phytol	-0.019	1	-0.46	0.2	0.57	0.1	0.53	0.1	0.53	0.1	0.8	0.01	0.67	0.05	0.67	0.05	-0.33	0.4	0.062	0.9	-0.49	0.2	-0.56	0.1	-0.75	0.02	-0.31	0.4	0.074	0.8	0.24	0.5	0.21	0.6	-0.23	0.6	-0.48	0.2	0.13	0.7	-0.09	0.8	-0.18	0.7	-0.025	0.9	0.15	0.7	-0.055
Plantamajoside	-0.96	3e-05	-0.54	0.1	-0.62	0.08	-0.57	0.1	0.1	0.8	0.095	0.8	0.53	0.1	0.34	0.4	0.19	0.6	0.39	0.3	0.037	0.9	0.39	0.3	0.68	0.04	0.82	0.007	0.86	0.003	0.41	0.3	0.39	0.3	0.52	0.1	-0.066	0.9	-0.36	0.3	0.14	0.7	0.3	0.4	0.65	0.06	0.012	1	0.071
Podophyllotoxin	-0.84	0.005	-0.32	0.4	-0.73	0.03	-0.67	0.05	-0.1	0.8	-0.16	0.7	0.24	0.5	0.091	0.8	0.26	0.5	0.33	0.4	0.22	0.6	0.56	0.1	0.85	0.004	0.82	0.006	0.74	0.02	0.31	0.4	0.26	0.5	0.55	0.1	0.1	0.8	-0.34	0.4	0.19	0.6	0.34	0.4	0.59	0.09	-0.017	1	0.072
Prunetin	-0.63	0.07	-0.078	0.8	-0.77	0.01	-0.67	0.05	-0.3	0.4	-0.39	0.3	-0.062	0.9	-0.2	0.6	0.44	0.2	0.29	0.5	0.38	0.3	0.58	0.1	0.93	0.0003	0.76	0.02	0.55	0.1	0.15	0.7	0.21	0.6	0.56	0.1	0.28	0.5	-0.36	0.3	0.15	0.7	0.28	0.5	0.46	0.2	-0.043	0.9	0.11
Punicic.acid	0.21	0.6	-0.3	0.4	0.67	0.05	0.62	0.07	0.47	0.2	0.71	0.03	0.49	0.2	0.54	0.1	-0.35	0.4	-0.043	0.9	-0.47	0.2	-0.61	0.08	-0.86	0.003	-0.48	0.2	-0.14	0.7	0.12	0.8	0.1	0.8	-0.34	0.4	-0.42	0.3	0.2	0.6	-0.12	0.8	-0.24	0.5	-0.18	0.6	0.13	0.7	-0.068
Putrescine	0.93	0.0002	0.51	0.2	0.6	0.09	0.64	0.06	-0.12	0.8	-0.027	0.9	-0.49	0.2	-0.23	0.6	-0.22	0.6	-0.36	0.3	-0.057	0.9	-0.48	0.2	-0.71	0.03	-0.83	0.006	-0.85	0.003	-0.41	0.3	-0.32	0.4	-0.5	0.2	0.098	0.8	0.44	0.2	-0.083	0.8	-0.22	0.6	-0.57	0.1	0.1	0.8	-0.077
Pyridoxine	0.92	0.0004	0.49	0.2	0.68	0.04	0.69	0.04	-0.048	0.9	0.044	0.9	-0.42	0.3	-0.19	0.6	-0.21	0.6	-0.33	0.4	-0.084	0.8	-0.48	0.2	-0.75	0.02	-0.8	0.01	-0.81	0.008	-0.42	0.3	-0.35	0.4	-0.54	0.1	0.0072	1	0.39	0.3	-0.16	0.7	-0.24	0.5	-0.58	0.1	0.066	0.9	-0.099
Pyridoxine.O.glucoside	-0.33	0.4	0.2	0.6	-0.75	0.02	-0.66	0.06	-0.46	0.2	-0.66	0.05	-0.4	0.3	-0.45	0.2	0.38	0.3	0.092	0.8	0.45	0.2	0.56	0.1	0.89	0.001	0.55	0.1	0.23	0.6	-0.064	0.9	0.0075	1	0.41	0.3	0.42	0.3	-0.21	0.6	0.16	0.7	0.27	0.5	0.26	0.5	-0.088	0.8	0.12
Quercetin.3.O.rutinoside.Rutin	-0.67	0.05	-0.17	0.7	-0.75	0.02	-0.74	0.02	-0.22	0.6	-0.36	0.3	0.023	1	-0.16	0.7	0.38	0.3	0.21	0.6	0.31	0.4	0.65	0.06	0.87	0.002	0.78	0.01	0.57	0.1	0.24	0.5	0.16	0.7	0.52	0.2	0.17	0.7	-0.36	0.3	0.16	0.7	0.22	0.6	0.4	0.3	-0.14	0.7	0.18
Quercetin.7.O.rutinoside	-0.76	0.02	-0.3	0.4	-0.76	0.02	-0.79	0.01	-0.059	0.9	-0.35	0.4	0.15	0.7	-0.079	0.8	0.25	0.5	0.18	0.6	0.14	0.7	0.55	0.1	0.85	0.004	0.73	0.03	0.63	0.07	0.25	0.5	0.2	0.6	0.52	0.2	0.16	0.7	-0.39	0.3	0.13	0.7	0.19	0.6	0.45	0.2	-0.16	0.7	0.055
Ribulose.5.phosphate	0.9	0.001	0.45	0.2	0.73	0.03	0.67	0.05	0.072	0.9	0.04	0.9	-0.37	0.3	-0.26	0.5	-0.14	0.7	-0.31	0.4	-0.15	0.7	-0.51	0.2	-0.75	0.02	-0.8	0.01	-0.77	0.02	-0.46	0.2	-0.33	0.4	-0.53	0.1	-0.035	0.9	0.22	0.6	-0.31	0.4	-0.37	0.3	-0.62	0.07	-0.033	0.9	-0.16
Schaftoside	-0.92	0.0005	-0.46	0.2	-0.71	0.03	-0.64	0.07	-0.0016	1	-0.049	0.9	0.39	0.3	0.24	0.5	0.21	0.6	0.33	0.4	0.11	0.8	0.5	0.2	0.77	0.02	0.83	0.006	0.79	0.01	0.39	0.3	0.31	0.4	0.6	0.09	0.062	0.9	-0.32	0.4	0.21	0.6	0.3	0.4	0.64	0.06	0.024	1	0.041
Schizandrin	0.6	0.09	0.042	0.9	0.76	0.02	0.71	0.03	0.28	0.5	0.45	0.2	0.1	0.8	0.23	0.6	-0.35	0.4	-0.21	0.6	-0.35	0.3	-0.62	0.08	-0.92	0.0004	-0.72	0.03	-0.5	0.2	-0.11	0.8	-0.11	0.8	-0.49	0.2	-0.26	0.5	0.32	0.4	-0.15	0.7	-0.29	0.4	-0.42	0.3	0.095	0.8	-0.089
Selgin.5.O.hexoside	-0.85	0.004	-0.51	0.2	-0.62	0.08	-0.77	0.02	0.21	0.6	-0.19	0.6	0.41	0.3	0.19	0.6	-0.007	1	0.053	0.9	-0.11	0.8	0.51	0.2	0.63	0.07	0.75	0.02	0.67	0.05	0.31	0.4	0.047	0.9	0.37	0.3	-0.083	0.8	-0.31	0.4	0.12	0.8	0.18	0.6	0.42	0.3	-0.25	0.5	0.016
Selgin.O.malonylhexoside	-0.79	0.01	-0.24	0.5	-0.75	0.02	-0.64	0.06	-0.17	0.7	-0.2	0.6	0.16	0.7	0.022	1	0.35	0.4	0.37	0.3	0.29	0.5	0.55	0.1	0.89	0.001	0.82	0.006	0.71	0.03	0.26	0.5	0.28	0.5	0.58	0.1	0.16	0.7	-0.36	0.3	0.17	0.7	0.34	0.4	0.6	0.09	0.012	1	0.072
serotonin	-0.7	0.04	-0.24	0.5	-0.78	0.01	-0.82	0.007	-0.12	0.8	-0.42	0.3	0.068	0.9	-0.17	0.7	0.27	0.5	0.15	0.7	0.18	0.6	0.58	0.1	0.86	0.003	0.67	0.05	0.57	0.1	0.27	0.5	0.2	0.6	0.55	0.1	0.24	0.5	-0.38	0.3	0.17	0.7	0.14	0.7	0.41	0.3	-0.16	0.7	0.054
Sinapoyl.malate	-0.87	0.002	-0.38	0.3	-0.76	0.02	-0.63	0.07	-0.099	0.8	-0.1	0.8	0.29	0.5	0.13	0.7	0.31	0.4	0.38	0.3	0.2	0.6	0.51	0.2	0.83	0.005	0.8	0.009	0.76	0.02	0.38	0.3	0.36	0.3	0.67	0.05	0.17	0.7	-0.35	0.4	0.22	0.6	0.28	0.5	0.65	0.06	0.07	0.9	0.033
Sissotrin	-0.48	0.2	0.062	0.9	-0.77	0.02	-0.7	0.04	-0.38	0.3	-0.55	0.1	-0.24	0.5	-0.32	0.4	0.35	0.4	0.14	0.7	0.4	0.3	0.62	0.07	0.91	0.0007	0.66	0.05	0.37	0.3	0.053	0.9	0.043	0.9	0.46	0.2	0.34	0.4	-0.24	0.5	0.18	0.6	0.29	0.4	0.35	0.4	-0.09	0.8	0.11
sn.Glycero.3.phosphocholine	-0.89	0.001	-0.44	0.2	-0.72	0.03	-0.68	0.04	-0.039	0.9	-0.096	0.8	0.35	0.4	0.13	0.7	0.31	0.4	0.35	0.4	0.13	0.7	0.41	0.3	0.79	0.01	0.8	0.01	0.77	0.02	0.36	0.3	0.41	0.3	0.55	0.1	0.051	0.9	-0.39	0.3	0.16	0.7	0.25	0.5	0.56	0.1	-0.043	0.9	0.18
Syringetin	-0.57	0.1	-0.015	1	-0.75	0.02	-0.7	0.04	-0.3	0.4	-0.47	0.2	-0.13	0.7	-0.26	0.5	0.38	0.3	0.22	0.6	0.38	0.3	0.62	0.07	0.93	0.0003	0.72	0.03	0.49	0.2	0.098	0.8	0.11	0.8	0.48	0.2	0.27	0.5	-0.34	0.4	0.13	0.7	0.28	0.5	0.4	0.3	-0.1	0.8	0.095
Tiliroside	-0.53	0.1	0.016	1	-0.75	0.02	-0.72	0.03	-0.31	0.4	-0.51	0.2	-0.17	0.7	-0.29	0.4	0.34	0.4	0.18	0.6	0.37	0.3	0.62	0.07	0.92	0.0004	0.68	0.04	0.44	0.2	0.075	0.8	0.075	0.8	0.44	0.2	0.28	0.5	-0.31	0.4	0.14	0.7	0.29	0.5	0.37	0.3	-0.12	0.8	0.095
trans.Citridic.acid	-0.68	0.04	-0.6	0.09	-0.21	0.6	-0.35	0.4	0.2	0.6	0.4	0.3	0.68	0.04	0.38	0.3	0.093	0.8	0.36	0.3	-0.11	0.8	-0.11	0.8	0.19	0.6	0.38	0.3	0.68	0.04	0.49	0.2	0.71	0.03	0.075	0.8	-0.4	0.3	-0.29	0.5	0.029	0.9	0.09	0.8	0.25	0.5	-0.1	0.8	0.5
Tricin	-0.7	0.04	-0.13	0.7	-0.76	0.02	-0.65	0.06	-0.25	0.5	-0.31	0.4	0.024	1	-0.13	0.7	0.42	0.3	0.34	0.4	0.35	0.4	0.57	0.1	0.93	0.0003	0.79	0.01	0.62	0.07	0.19	0.6	0.24	0.5	0.57	0.1	0.23	0.6	-0.38	0.3	0.13	0.7	0.3	0.4	0.52	0.2	-0.026	0.9	0.088
Tricin.4.O.syringyl.alcohol	-0.78	0.01	-0.25	0.5	-0.76	0.02	-0.69	0.04	-0.17	0.7	-0.24	0.5	0.15	0.7	-0.023	1	0.35	0.4	0.32	0.4	0.27	0.5	0.56	0.1	0.89	0.001	0.8	0.009	0.68	0.04	0.28	0.5	0.28	0.5	0.58	0.1	0.17	0.7	-0.37	0.3	0.17	0.7	0.29	0.5	0.55	0.1	-0.033	0.9	0.099
Tricin.eudesmic.acid	-0.76	0.02	-0.24	0.5	-0.75	0.02	-0.67	0.05	-0.17	0.7	-0.26	0.5	0.13	0.7	-0.044	0.9	0.39	0.3	0.32	0.4	0.27	0.5	0.55	0.1	0.88	0.002	0.83	0.006	0.66	0.05	0.22	0.6	0.25	0.5	0.55	0.1	0.15	0.7	-0.38	0.3	0.13	0.7	0.28	0.5	0.51	0.2	-0.062	0.9	0.13
Tricin.guaiacylglycerol	-0.73	0.02	-0.2	0.6	-0.79	0.01	-0.71	0.03	-0.21	0.6	-0.32	0.4	0.067	0.9	-0.083	0.8	0.34	0.4	0.28	0.5	0.29	0.5	0.56	0.1	0.91	0.0007	0.76	0.02	0.62	0.07	0.24	0.5	0.25	0.5	0.57	0.1	0.23	0.5	-0.34	0.4	0.19	0.6	0.29	0.4	0.53	0.1	-0.031	0.9	0.089
Tricin.guaiacylglyceryl.ether.hexosyl.hexoside	-0.55	0.1	0.0079	1	-0.75	0.02	-0.71	0.03	-0.3	0.4	-0.49	0.2	-0.16	0.7	-0.31	0.4	0.37	0.3	0.23	0.6	0.38	0.3	0.6	0.09	0.94	0.0001	0.66	0.05	0.48	0.2	0.097	0.8	0.14	0.7	0.49	0.2	0.31	0.4	-0.36	0.3	0.12	0.8	0.25	0.5	0.4	0.3	-0.099	0.8	0.06
Tricin.hexoside	-0.91	0.0008	-0.48	0.2	-0.74	0.02	-0.69	0.04	0.016	1	-0.11	0.8	0.38	0.3	0.19	0.6	0.21	0.6	0.27	0.5	0.071	0.9	0.49	0.2	0.76	0.02	0.8	0.009	0.75	0.02	0.39	0.3	0.3	0.4	0.6	0.09	0.078	0.8	-0.33	0.4	0.21	0.6	0.24	0.5	0.59	0.09	-0.027	0.9	0.057
Tricin.O.malonyl.rhamnoside	-0.73	0.03	-0.19	0.6	-0.79	0.01	-0.7	0.04	-0.23	0.6	-0.32	0.4	0.058	0.9	-0.078	0.8	0.34	0.4	0.29	0.4	0.3	0.4	0.54	0.1	0.91	0.0006	0.77	0.02	0.62	0.08	0.21	0.6	0.25	0.5	0.56	0.1	0.24	0.5	-0.33	0.4	0.19	0.6	0.32	0.4	0.53	0.1	-0.018	1	0.099
Tricin.O.phenylformic.acid	-0.89	0.001	-0.42	0.3	-0.72	0.03	-0.67	0.05	-0.029	0.9	-0.096	0.8	0.34	0.4	0.14	0.7	0.28	0.5	0.34	0.4	0.15	0.7	0.51	0.2	0.8	0.009	0.82	0.007	0.78	0.01	0.38	0.3	0.34	0.4	0.58	0.1	0.061	0.9	-0.39	0.3	0.17	0.7	0.26	0.5	0.59	0.09	-0.033	0.9	0.092
Tricin.O.sinapoylhexoside	-0.94	0.0002	-0.5	0.2	-0.5	0.2	-0.37	0.3	0.15	0.7	0.24	0.5	0.57	0.1	0.43	0.2	0.19	0.6	0.53	0.1	0.028	0.9	0.22	0.6	0.63	0.07	0.78	0.01	0.9	0.001	0.31	0.4	0.44	0.2	0.47	0.2	-0.1	0.8	-0.37	0.3	0.047	0.9	0.38	0.3	0.72	0.03	0.12	0.8	-0.016
Tricin.O.vanilloylhexoside	0.76	0.02	0.23	0.5	0.73	0.02	0.68	0.05	0.12	0.8	0.29	0.5	-0.13	0.7	0.023	1	-0.32	0.4	-0.28	0.5	-0.22	0.6	-0.52	0.1	-0.87	0.002	-0.82	0.007	-0.65	0.06	-0.16	0.7	-0.19	0.6	-0.5	0.2	-0.14	0.7	0.37	0.3	-0.1	0.8	-0.31	0.4	-0.52	0.2	0.079	0.8	-0.064
Tricin.oxalic.acid.coumaroyl.shikimic.acid	-0.57	0.1	0.0021	1	-0.75	0.02	-0.69	0.04	-0.33	0.4	-0.45	0.2	-0.14	0.7	-0.27	0.5	0.39	0.3	0.25	0.5	0.41	0.3	0.64	0.07	0.94	0.0002	0.72	0.03	0.49	0.2	0.12	0.8	0.13	0.7	0.49	0.2	0.27	0.5	-0.33	0.4	0.14	0.7	0.29	0.4	0.41	0.3	-0.084	0.8	0.11
Uridine.5.monophosphate	0.65	0.06	0.097	0.8	0.74	0.02	0.71	0.03	0.23	0.5	0.39	0.3	0.026	0.9	0.2	0.6	-0.38	0.3	-0.26	0.5	-0.33	0.4	-0.6	0.09	-0.92	0.0004	-0.76	0.02	-0.57	0.1	-0.14	0.7	-0.17	0.7	-0.49	0.2	-0.21	0.6	0.38	0.3	-0.11	0.8	-0.28	0.5	-0.44	0.2	0.11	0.8	-0.11
Vanillic.acid	0.51	0.2	-0.025	0.9	0.77	0.01	0.73	0.03	0.32	0.4	0.55	0.1	0.2	0.6	0.3	0.4	-0.3	0.4	-0.14	0.7	-0.35	0.4	-0.6	0.09	-0.91	0.0005	-0.64	0.06	-0.4	0.3	-0.06	0.9	-0.061	0.9	-0.45	0.2	-0.33	0.4	0.27	0.5	-0.17	0.7	-0.29	0.5	-0.37	0.3	0.11	0.8	-0.071
Verbascoside	-0.76	0.02	-0.23	0.6	-0.75	0.02	-0.71	0.03	-0.16	0.7	-0.27	0.5	0.13	0.7	-0.047	0.9	0.32	0.4	0.3	0.4	0.26	0.5	0.56	0.1	0.89	0.001	0.79	0.01	0.67	0.05	0.24	0.5	0.24	0.5	0.52	0.1	0.15	0.7	-0.37	0.3	0.15	0.7	0.3	0.4	0.52	0.2	-0.071	0.9	0.1
Vomifoliol	0.92	0.0004	0.44	0.2	0.68	0.05	0.6	0.09	0.021	1	-0.016	1	-0.41	0.3	-0.26	0.5	-0.23	0.6	-0.41	0.3	-0.15	0.7	-0.44	0.2	-0.77	0.01	-0.83	0.006	-0.83	0.005	-0.38	0.3	-0.38	0.3	-0.53	0.1	-0.007	1	0.33	0.4	-0.18	0.6	-0.36	0.3	-0.66	0.05	-0.038	0.9	-0.11
1.methylguanidine	-0.44	0.2	0.18	0.6	-0.65	0.06	-0.58	0.1	-0.45	0.2	-0.41	0.3	-0.25	0.5	-0.28	0.5	0.33	0.4	0.29	0.5	0.55	0.1	0.67	0.05	0.92	0.0004	0.69	0.04	0.43	0.2	0.051	0.9	0.052	0.9	0.31	0.4	0.21	0.6	-0.22	0.6	0.15	0.7	0.45	0.2	0.38	0.3	-0.059	0.9	0.18
1.O.Feruloyl.quinic.acid	-0.42	0.3	0.07	0.9	-0.76	0.02	-0.75	0.02	-0.41	0.3	-0.6	0.09	-0.27	0.5	-0.36	0.3	0.31	0.4	0.06	0.9	0.37	0.3	0.53	0.1	0.86	0.003	0.59	0.09	0.29	0.5	0.026	0.9	0.078	0.8	0.33	0.4	0.3	0.4	-0.19	0.6	0.19	0.6	0.28	0.5	0.23	0.5	-0.16	0.7	0.27
13.HPODE	0.18	0.6	-0.32	0.4	0.66	0.05	0.61	0.08	0.47	0.2	0.72	0.03	0.52	0.2	0.54	0.1	-0.33	0.4	-0.0098	1	-0.46	0.2	-0.61	0.08	-0.84	0.005	-0.47	0.2	-0.1	0.8	0.14	0.7	0.14	0.7	-0.31	0.4	-0.42	0.3	0.18	0.6	-0.12	0.8	-0.24	0.5	-0.16	0.7	0.14	0.7	-0.062
13.HpOTrEr	-0.039	0.9	-0.53	0.1	0.49	0.2	0.45	0.2	0.54	0.1	0.72	0.03	0.68	0.04	0.72	0.03	-0.47	0.2	-0.059	0.9	-0.58	0.1	-0.59	0.09	-0.78	0.01	-0.36	0.3	0.022	1	0.27	0.5	0.19	0.6	-0.22	0.6	-0.41	0.3	0.24	0.5	0.025	0.9	-0.16	0.7	-0.019	1	0.17	0.7	-0.06
14.15.Dehydrocrepenynic.acid	0.13	0.7	-0.36	0.3	0.64	0.06	0.59	0.09	0.5	0.2	0.75	0.02	0.56	0.1	0.59	0.09	-0.36	0.3	-0.008	1	-0.48	0.2	-0.59	0.1	-0.82	0.006	-0.43	0.3	-0.059	0.9	0.17	0.7	0.13	0.7	-0.3	0.4	-0.45	0.2	0.18	0.6	-0.1	0.8	-0.21	0.6	-0.12	0.8	0.14	0.7	-0.072
2.6.Dimethyl.7.octene.2.3.6.triol	0.35	0.3	-0.18	0.6	0.71	0.03	0.67	0.05	0.41	0.3	0.63	0.07	0.36	0.3	0.45	0.2	-0.38	0.3	-0.12	0.8	-0.44	0.2	-0.62	0.08	-0.9	0.0009	-0.59	0.1	-0.28	0.5	0.045	0.9	0.015	1	-0.39	0.3	-0.36	0.3	0.27	0.5	-0.11	0.8	-0.26	0.5	-0.26	0.5	0.13	0.7	-0.091
2.Aminoadipic.acid.L.Homoglutamic.acid	0.29	0.5	-0.23	0.5	0.68	0.05	0.67	0.05	0.41	0.3	0.67	0.05	0.41	0.3	0.53	0.1	-0.37	0.3	-0.091	0.8	-0.45	0.2	-0.61	0.08	-0.89	0.001	-0.51	0.2	-0.23	0.5	0.062	0.9	0.021	1	-0.35	0.4	-0.37	0.3	0.29	0.4	-0.079	0.8	-0.2	0.6	-0.2	0.6	0.18	0.6	-0.087
2.Deoxyadenosine.5.monophosphate	-0.25	0.5	0.26	0.5	-0.66	0.05	-0.63	0.07	-0.44	0.2	-0.67	0.05	-0.44	0.2	-0.48	0.2	0.35	0.4	0.034	0.9	0.45	0.2	0.64	0.06	0.84	0.004	0.56	0.1	0.17	0.7	-0.12	0.8	-0.14	0.7	0.31	0.4	0.35	0.4	-0.2	0.6	0.11	0.8	0.26	0.5	0.18	0.6	-0.16	0.7	0.11
2.Deoxyinosine.5.monophosphate	0.81	0.008	0.32	0.4	0.79	0.01	0.72	0.03	0.14	0.7	0.22	0.6	-0.19	0.6	-0.054	0.9	-0.23	0.6	-0.28	0.5	-0.23	0.6	-0.6	0.09	-0.85	0.003	-0.76	0.02	-0.69	0.04	-0.39	0.3	-0.26	0.5	-0.62	0.08	-0.2	0.6	0.29	0.4	-0.28	0.5	-0.29	0.5	-0.59	0.1	-0.011	1	-0.05
2.Hydroxygenistein	-0.47	0.2	-0.0034	1	-0.76	0.02	-0.74	0.02	-0.25	0.5	-0.6	0.09	-0.21	0.6	-0.41	0.3	0.34	0.4	0.091	0.8	0.29	0.4	0.63	0.07	0.88	0.002	0.53	0.1	0.36	0.3	0.12	0.8	0.064	0.9	0.58	0.1	0.43	0.2	-0.37	0.3	0.14	0.7	0.079	0.8	0.33	0.4	-0.12	0.8	-0.081
3.4.Dihydrocoumarin	0.48	0.2	-0.076	0.8	0.73	0.02	0.69	0.04	0.34	0.4	0.54	0.1	0.23	0.5	0.36	0.3	-0.39	0.3	-0.18	0.6	-0.41	0.3	-0.63	0.07	-0.92	0.0004	-0.67	0.05	-0.4	0.3	-0.029	0.9	-0.048	0.9	-0.45	0.2	-0.31	0.4	0.33	0.4	-0.11	0.8	-0.26	0.5	-0.34	0.4	0.13	0.7	-0.082
3.4.Dihydroxybenzeneacetic.acid	-0.99	8e-07	-0.67	0.05	-0.48	0.2	-0.44	0.2	0.22	0.6	0.33	0.4	0.72	0.03	0.53	0.1	0.11	0.8	0.44	0.2	-0.067	0.9	0.25	0.5	0.5	0.2	0.75	0.02	0.91	0.0007	0.51	0.2	0.49	0.2	0.47	0.2	-0.2	0.6	-0.33	0.4	0.14	0.7	0.27	0.5	0.66	0.05	0.064	0.9	0.092
3.4.Dimethoxycinnamic.acid	-0.58	0.1	-0.023	1	-0.76	0.02	-0.71	0.03	-0.3	0.4	-0.48	0.2	-0.13	0.7	-0.25	0.5	0.34	0.4	0.2	0.6	0.36	0.3	0.62	0.08	0.92	0.0004	0.71	0.03	0.48	0.2	0.1	0.8	0.099	0.8	0.48	0.2	0.28	0.5	-0.31	0.4	0.15	0.7	0.29	0.4	0.41	0.3	-0.097	0.8	0.086
3.Hydroxyanthranilic.acid	-0.87	0.002	-0.8	0.01	-0.17	0.7	-0.13	0.7	0.42	0.3	0.64	0.06	0.92	0.0004	0.77	0.01	-0.033	0.9	0.4	0.3	-0.28	0.5	-0.024	1	0.096	0.8	0.53	0.1	0.82	0.007	0.56	0.1	0.5	0.2	0.34	0.4	-0.37	0.3	-0.21	0.6	0.098	0.8	0.15	0.7	0.57	0.1	0.14	0.7	0.046
4.Hydroxy.3.5.diisopropylbenzaldehyde	0.59	0.1	0.01	1	0.76	0.02	0.67	0.05	0.35	0.4	0.42	0.3	0.12	0.8	0.2	0.6	-0.36	0.3	-0.26	0.5	-0.41	0.3	-0.6	0.09	-0.93	0.0003	-0.75	0.02	-0.5	0.2	-0.11	0.8	-0.14	0.7	-0.47	0.2	-0.26	0.5	0.27	0.5	-0.18	0.7	-0.37	0.3	-0.45	0.2	0.045	0.9	-0.15
4.Hydroxy.3.methoxycinnamaldehyde	-0.52	0.2	0.043	0.9	-0.8	0.01	-0.68	0.04	-0.38	0.3	-0.51	0.2	-0.21	0.6	-0.31	0.4	0.37	0.3	0.22	0.6	0.41	0.3	0.58	0.1	0.95	0.0001	0.64	0.07	0.43	0.3	0.085	0.8	0.15	0.7	0.53	0.1	0.39	0.3	-0.28	0.5	0.19	0.6	0.3	0.4	0.43	0.3	-0.023	1	0.062
4.Hydroxybenzoic.acid	-0.036	0.9	-0.48	0.2	0.56	0.1	0.52	0.2	0.54	0.1	0.8	0.01	0.68	0.04	0.68	0.04	-0.34	0.4	0.061	0.9	-0.5	0.2	-0.55	0.1	-0.75	0.02	-0.3	0.4	0.088	0.8	0.25	0.5	0.22	0.6	-0.23	0.6	-0.48	0.2	0.13	0.7	-0.084	0.8	-0.17	0.7	-0.018	1	0.15	0.7	-0.054
4.oxo.9Z.11Z.13E.15E.octadecatetraenoic.acid	0.61	0.08	0.063	0.9	0.75	0.02	0.72	0.03	0.25	0.5	0.45	0.2	0.078	0.8	0.21	0.6	-0.31	0.4	-0.21	0.6	-0.32	0.4	-0.62	0.08	-0.92	0.0005	-0.72	0.03	-0.52	0.2	-0.12	0.8	-0.099	0.8	-0.48	0.2	-0.25	0.5	0.32	0.4	-0.14	0.7	-0.3	0.4	-0.43	0.2	0.11	0.8	-0.063
4.Pyridoxic.acid	0.49	0.2	-0.072	0.9	0.73	0.02	0.69	0.04	0.35	0.4	0.53	0.1	0.22	0.6	0.33	0.4	-0.37	0.3	-0.19	0.6	-0.41	0.3	-0.62	0.07	-0.93	0.0003	-0.67	0.05	-0.41	0.3	-0.036	0.9	-0.059	0.9	-0.43	0.2	-0.3	0.4	0.31	0.4	-0.12	0.8	-0.29	0.4	-0.36	0.3	0.11	0.8	-0.095
6.Gingerol	-0.0022	1	-0.43	0.3	0.57	0.1	0.57	0.1	0.48	0.2	0.82	0.007	0.65	0.06	0.68	0.04	-0.29	0.4	0.099	0.8	-0.44	0.2	-0.56	0.1	-0.74	0.02	-0.29	0.5	0.07	0.9	0.23	0.6	0.23	0.6	-0.23	0.6	-0.47	0.2	0.15	0.7	-0.076	0.8	-0.14	0.7	-0.012	1	0.19	0.6	-0.02
7.Methylxanthine	0.85	0.003	0.35	0.4	0.7	0.04	0.54	0.1	0.14	0.7	0.023	1	-0.29	0.4	-0.14	0.7	-0.44	0.2	-0.46	0.2	-0.28	0.5	-0.5	0.2	-0.82	0.007	-0.87	0.003	-0.78	0.01	-0.36	0.3	-0.4	0.3	-0.65	0.06	-0.1	0.8	0.38	0.3	-0.17	0.7	-0.29	0.4	-0.63	0.07	-0.08	0.8	-0.13
8.C.hexosyl.luteolin.O.hexoside	0.8	0.01	0.24	0.5	0.51	0.2	0.49	0.2	0.037	0.9	-0.00065	1	-0.29	0.4	-0.17	0.7	-0.28	0.5	-0.45	0.2	-0.26	0.5	-0.52	0.1	-0.78	0.01	-0.92	0.0005	-0.79	0.01	-0.17	0.7	-0.17	0.7	-0.3	0.4	0.16	0.7	0.38	0.3	0.012	1	-0.45	0.2	-0.54	0.1	0.091	0.8	-0.14
9.10.EODE	0.29	0.5	-0.24	0.5	0.7	0.04	0.64	0.06	0.44	0.2	0.67	0.05	0.43	0.2	0.49	0.2	-0.36	0.3	-0.08	0.8	-0.46	0.2	-0.61	0.08	-0.88	0.002	-0.54	0.1	-0.21	0.6	0.086	0.8	0.061	0.9	-0.37	0.3	-0.4	0.3	0.23	0.6	-0.12	0.8	-0.26	0.5	-0.23	0.6	0.13	0.7	-0.076
9.HOTrE	0.3	0.4	-0.23	0.6	0.7	0.03	0.65	0.06	0.44	0.2	0.66	0.05	0.41	0.3	0.48	0.2	-0.36	0.3	-0.081	0.8	-0.45	0.2	-0.62	0.08	-0.89	0.001	-0.55	0.1	-0.22	0.6	0.071	0.9	0.055	0.9	-0.37	0.3	-0.39	0.3	0.23	0.5	-0.13	0.7	-0.26	0.5	-0.24	0.5	0.13	0.7	-0.079
9.HpOTrE	0.0067	1	-0.46	0.2	0.56	0.1	0.5	0.2	0.55	0.1	0.76	0.02	0.65	0.06	0.67	0.05	-0.43	0.3	-0.0021	1	-0.53	0.1	-0.57	0.1	-0.78	0.01	-0.38	0.3	0.032	0.9	0.25	0.5	0.18	0.6	-0.25	0.5	-0.44	0.2	0.18	0.6	-0.048	0.9	-0.18	0.6	-0.04	0.9	0.15	0.7	-0.094
9.Hydroxy.10E.12Z.15Z.octadecatrienoic.acid	-0.028	0.9	-0.46	0.2	0.57	0.1	0.53	0.1	0.54	0.1	0.8	0.01	0.68	0.05	0.68	0.05	-0.33	0.4	0.069	0.9	-0.49	0.2	-0.56	0.1	-0.74	0.02	-0.3	0.4	0.085	0.8	0.24	0.5	0.21	0.6	-0.23	0.6	-0.48	0.2	0.12	0.8	-0.095	0.8	-0.17	0.7	-0.018	1	0.15	0.7	-0.06
9.KODE	0.054	0.9	-0.41	0.3	0.61	0.08	0.57	0.1	0.52	0.2	0.77	0.01	0.62	0.07	0.63	0.07	-0.33	0.4	0.031	0.9	-0.49	0.2	-0.58	0.1	-0.79	0.01	-0.36	0.3	0.0096	1	0.2	0.6	0.18	0.7	-0.27	0.5	-0.47	0.2	0.14	0.7	-0.11	0.8	-0.2	0.6	-0.078	0.8	0.14	0.7	-0.06
[truncated: 1 more columns]

## Sheet: S6-2
Table S6-2. The association results between differential metabolomes and drought related co-expression networks
Compounds	MElightgreen	p.MElightgreen	MEblack	p.MEblack	MEroyalblue	p.MEroyalblue	MEtan	p.MEtan	MEsaddlebrown	p.MEsaddlebrown	MEmagenta	p.MEmagenta	MEwhite	p.MEwhite	MEskyblue	p.MEskyblue	MEbrown	p.MEbrown	MEdarkgreen	p.MEdarkgreen	MEdarkorange	p.MEdarkorange	MEred	p.MEred	MEcyan	p.MEcyan	MEdarkred	p.MEdarkred	MEsteelblue	p.MEsteelblue	MEgrey60	p.MEgrey60	MEmidnightblue	p.MEmidnightblue	MEdarkturquoise	p.MEdarkturquoise	MEsalmon	p.MEsalmon	MEyellow	p.MEyellow	MEgreen	p.MEgreen	MEpink	p.MEpink	MElightcyan	p.MElightcyan	MEpaleturquoise	p.MEpaleturquoise	MEpurple
1,4-dihydro-1-Methyl-4-oxo-3-pyridinecarboxamide	0.18	0.7	0.89	0.003	0.71	0.05	0.53	0.2	0.57	0.1	0.66	0.07	0.42	0.3	0.048	0.9	0.1	0.8	-0.3	0.5	0.58	0.1	0.7	0.06	0.67	0.07	0.26	0.5	0.036	0.9	0.52	0.2	0.21	0.6	-0.35	0.4	-0.58	0.1	-0.51	0.2	-0.45	0.3	0.14	0.7	-0.0053	1	-0.66	0.08	0.0075
1-methylguanidine	0.056	0.9	0.66	0.08	0.49	0.2	0.39	0.3	0.21	0.6	-0.034	0.9	0.2	0.6	0.34	0.4	0.71	0.05	0.17	0.7	0.74	0.04	0.17	0.7	0.67	0.07	0.35	0.4	-0.26	0.5	0.32	0.4	0.45	0.3	-0.06	0.9	0.12	0.8	-0.29	0.5	-0.97	6e-05	-0.62	0.1	-0.42	0.3	-0.73	0.04	-0.54
2-(Formylamino)benzoic acid	0.19	0.7	0.61	0.1	0.36	0.4	0.38	0.4	0.24	0.6	-0.084	0.8	0.16	0.7	0.45	0.3	0.81	0.02	0.35	0.4	0.69	0.06	0.22	0.6	0.75	0.03	0.55	0.2	-0.32	0.4	0.23	0.6	0.46	0.3	0.085	0.8	0.15	0.7	-0.32	0.4	-0.97	5e-05	-0.61	0.1	-0.36	0.4	-0.7	0.05	-0.58
2,6-Diaminooimelic acid	0.1	0.8	0.71	0.05	0.54	0.2	0.41	0.3	0.29	0.5	0.14	0.7	0.34	0.4	0.15	0.7	0.61	0.1	0.091	0.8	0.67	0.07	0.21	0.6	0.73	0.04	0.35	0.4	-0.11	0.8	0.49	0.2	0.53	0.2	-0.091	0.8	0.08	0.9	-0.19	0.6	-0.93	0.001	-0.57	0.1	-0.28	0.5	-0.7	0.05	-0.48
2'-Deoxyinosine-5'-monophosphate	-0.23	0.6	-0.69	0.06	-0.33	0.4	-0.37	0.4	-0.38	0.4	-0.056	0.9	-0.068	0.9	-0.58	0.1	-0.68	0.06	-0.33	0.4	-0.73	0.04	-0.56	0.2	-0.86	0.006	-0.69	0.06	0.34	0.4	-0.19	0.7	-0.39	0.3	-0.13	0.8	0.1	0.8	0.51	0.2	0.84	0.009	0.28	0.5	0.19	0.7	0.69	0.06	0.49
2-Deoxyribose 1-phosphate	-0.24	0.6	-0.77	0.03	-0.54	0.2	-0.45	0.3	-0.56	0.2	-0.34	0.4	-0.4	0.3	-0.2	0.6	-0.53	0.2	-0.18	0.7	-0.54	0.2	-0.5	0.2	-0.86	0.006	-0.56	0.1	0.17	0.7	-0.46	0.2	-0.49	0.2	0.039	0.9	0.15	0.7	0.34	0.4	0.79	0.02	0.26	0.5	0.042	0.9	0.6	0.1	0.37
2'-Hydroxygenistein	0.18	0.7	0.75	0.03	0.53	0.2	0.41	0.3	0.37	0.4	0.2	0.6	0.15	0.7	0.39	0.3	0.55	0.2	0.079	0.9	0.76	0.03	0.55	0.2	0.8	0.02	0.49	0.2	-0.23	0.6	0.33	0.4	0.36	0.4	-0.014	1	-0.19	0.7	-0.48	0.2	-0.81	0.01	-0.25	0.5	-0.18	0.7	-0.78	0.02	-0.43
3-(4-Hydroxyphenyl)propionic acid	0.2	0.6	0.44	0.3	0.29	0.5	0.3	0.5	0.27	0.5	-0.2	0.6	0.11	0.8	0.49	0.2	0.87	0.005	0.55	0.2	0.51	0.2	0.16	0.7	0.7	0.05	0.61	0.1	-0.47	0.2	0.099	0.8	0.44	0.3	0.22	0.6	0.27	0.5	-0.27	0.5	-0.95	0.0004	-0.62	0.1	-0.29	0.5	-0.54	0.2	-0.64
3',4',5'-Tricetin O-rutinoside	0.057	0.9	0.72	0.04	0.41	0.3	0.32	0.4	0.28	0.5	0.07	0.9	0.1	0.8	0.41	0.3	0.59	0.1	0.15	0.7	0.79	0.02	0.46	0.3	0.84	0.009	0.5	0.2	-0.2	0.6	0.37	0.4	0.5	0.2	0.044	0.9	-0.021	1	-0.36	0.4	-0.9	0.003	-0.38	0.3	-0.2	0.6	-0.71	0.05	-0.55
3-Hydroxy-4-methoxycinnamic acid	0.16	0.7	0.8	0.02	0.51	0.2	0.46	0.3	0.39	0.3	0.2	0.6	0.26	0.5	0.35	0.4	0.6	0.1	0.13	0.8	0.75	0.03	0.46	0.3	0.83	0.01	0.5	0.2	-0.19	0.6	0.39	0.3	0.45	0.3	-0.076	0.9	-0.12	0.8	-0.42	0.3	-0.88	0.004	-0.37	0.4	-0.25	0.5	-0.75	0.03	-0.42
3-Hydroxypyridine	0.15	0.7	0.79	0.02	0.53	0.2	0.44	0.3	0.33	0.4	0.19	0.7	0.18	0.7	0.38	0.4	0.56	0.2	0.045	0.9	0.81	0.02	0.5	0.2	0.78	0.02	0.45	0.3	-0.19	0.6	0.36	0.4	0.37	0.4	-0.076	0.9	-0.17	0.7	-0.47	0.2	-0.84	0.009	-0.31	0.5	-0.26	0.5	-0.8	0.02	-0.41
3-Indoleacetonitrile	-0.17	0.7	-0.83	0.01	-0.52	0.2	-0.44	0.3	-0.38	0.3	-0.3	0.5	-0.23	0.6	-0.31	0.5	-0.47	0.2	0.0083	1	-0.79	0.02	-0.57	0.1	-0.83	0.01	-0.47	0.2	0.098	0.8	-0.44	0.3	-0.41	0.3	0.092	0.8	0.24	0.6	0.45	0.3	0.78	0.02	0.22	0.6	0.16	0.7	0.78	0.02	0.36
3-Methyl-1-pentanol	-0.16	0.7	-0.81	0.01	-0.48	0.2	-0.4	0.3	-0.43	0.3	-0.32	0.4	-0.29	0.5	-0.23	0.6	-0.47	0.2	-0.062	0.9	-0.7	0.06	-0.55	0.2	-0.89	0.003	-0.52	0.2	0.052	0.9	-0.52	0.2	-0.52	0.2	0.04	0.9	0.17	0.7	0.34	0.4	0.79	0.02	0.25	0.6	0.066	0.9	0.68	0.06	0.4
3-O-Feruloyl quinic acid	0.13	0.8	0.74	0.04	0.46	0.2	0.37	0.4	0.31	0.5	0.13	0.8	0.13	0.8	0.39	0.3	0.59	0.1	0.12	0.8	0.78	0.02	0.49	0.2	0.83	0.01	0.51	0.2	-0.2	0.6	0.36	0.4	0.45	0.3	0.024	1	-0.084	0.8	-0.41	0.3	-0.87	0.005	-0.34	0.4	-0.2	0.6	-0.75	0.03	-0.5
3-O-p-Coumaroyl shikimic acid	0.12	0.8	0.67	0.07	0.39	0.3	0.35	0.4	0.27	0.5	-0.0025	1	0.15	0.7	0.41	0.3	0.71	0.05	0.26	0.5	0.74	0.04	0.33	0.4	0.82	0.01	0.53	0.2	-0.24	0.6	0.33	0.4	0.52	0.2	0.065	0.9	0.087	0.8	-0.31	0.5	-0.95	0.0002	-0.52	0.2	-0.28	0.5	-0.7	0.05	-0.58
4-Guanidinobutyric acid	0.12	0.8	0.78	0.02	0.41	0.3	0.38	0.4	0.35	0.4	0.17	0.7	0.22	0.6	0.34	0.4	0.57	0.1	0.15	0.7	0.76	0.03	0.46	0.2	0.88	0.004	0.54	0.2	-0.12	0.8	0.45	0.3	0.54	0.2	-0.0045	1	-0.061	0.9	-0.34	0.4	-0.88	0.004	-0.37	0.4	-0.19	0.7	-0.7	0.05	-0.48
4-Hydroxybenzaldehyde	0.16	0.7	0.47	0.2	0.25	0.5	0.29	0.5	0.15	0.7	-0.23	0.6	0.092	0.8	0.46	0.3	0.86	0.006	0.45	0.3	0.62	0.1	0.095	0.8	0.69	0.06	0.55	0.2	-0.36	0.4	0.17	0.7	0.49	0.2	0.19	0.7	0.31	0.5	-0.21	0.6	-0.98	3e-05	-0.7	0.05	-0.37	0.4	-0.61	0.1	-0.65
4-Hydroxysphinganine	0.0075	1	-0.72	0.05	-0.47	0.2	-0.3	0.5	-0.36	0.4	-0.11	0.8	-0.22	0.6	-0.29	0.5	-0.56	0.1	-0.18	0.7	-0.67	0.07	-0.39	0.3	-0.84	0.009	-0.45	0.3	0.19	0.7	-0.46	0.3	-0.58	0.1	-0.0077	1	-0.04	0.9	0.27	0.5	0.91	0.002	0.43	0.3	0.15	0.7	0.61	0.1	0.56
4-Methyl-5-thiazoleethanol	0.097	0.8	0.7	0.05	0.38	0.4	0.32	0.4	0.29	0.5	0.052	0.9	0.16	0.7	0.38	0.4	0.65	0.08	0.23	0.6	0.74	0.03	0.39	0.3	0.86	0.006	0.54	0.2	-0.19	0.7	0.39	0.3	0.56	0.2	0.071	0.9	0.051	0.9	-0.3	0.5	-0.93	0.0009	-0.46	0.3	-0.21	0.6	-0.68	0.06	-0.57
5,7-Dihydroxy-3',4',5'-trimethoxyflavone	0.071	0.9	0.7	0.05	0.4	0.3	0.34	0.4	0.26	0.5	0.009	1	0.14	0.7	0.41	0.3	0.67	0.07	0.22	0.6	0.77	0.03	0.34	0.4	0.81	0.01	0.5	0.2	-0.23	0.6	0.35	0.4	0.52	0.2	0.032	0.9	0.061	0.9	-0.33	0.4	-0.95	0.0004	-0.5	0.2	-0.29	0.5	-0.7	0.05	-0.57
5-Hydroxytryptophol	-0.13	0.8	-0.56	0.1	-0.33	0.4	-0.27	0.5	-0.17	0.7	0.073	0.9	-0.11	0.8	-0.35	0.4	-0.73	0.04	-0.28	0.5	-0.69	0.06	-0.25	0.5	-0.79	0.02	-0.53	0.2	0.2	0.6	-0.34	0.4	-0.55	0.2	-0.17	0.7	-0.2	0.6	0.19	0.6	0.95	0.0003	0.58	0.1	0.22	0.6	0.67	0.07	0.65
5-O-p-Coumaroyl shikimic acid	0.12	0.8	0.65	0.08	0.34	0.4	0.32	0.4	0.26	0.5	-0.02	1	0.14	0.7	0.41	0.3	0.72	0.05	0.3	0.5	0.72	0.04	0.33	0.4	0.84	0.009	0.57	0.1	-0.24	0.6	0.33	0.4	0.55	0.2	0.11	0.8	0.12	0.8	-0.29	0.5	-0.95	0.0003	-0.52	0.2	-0.25	0.6	-0.67	0.07	-0.6
6-C-hexosyl-luteolin O-hexoside	-0.11	0.8	-0.36	0.4	-0.2	0.6	-0.24	0.6	-0.055	0.9	0.34	0.4	-0.072	0.9	-0.42	0.3	-0.88	0.004	-0.48	0.2	-0.55	0.2	0.074	0.9	-0.58	0.1	-0.46	0.2	0.36	0.4	-0.13	0.8	-0.48	0.2	-0.2	0.6	-0.44	0.3	0.11	0.8	0.97	9e-05	0.81	0.02	0.42	0.3	0.54	0.2	0.68
8-C-hexosyl-luteolin O-pentoside	-0.1	0.8	-0.85	0.007	-0.59	0.1	-0.42	0.3	-0.39	0.3	-0.41	0.3	-0.28	0.5	-0.16	0.7	-0.32	0.4	0.17	0.7	-0.76	0.03	-0.58	0.1	-0.79	0.02	-0.35	0.4	-0.018	1	-0.55	0.2	-0.41	0.3	0.18	0.7	0.3	0.5	0.39	0.3	0.7	0.05	0.14	0.7	0.099	0.8	0.75	0.03	0.28
Acacetin	0.11	0.8	0.77	0.02	0.46	0.2	0.41	0.3	0.34	0.4	0.14	0.7	0.23	0.6	0.35	0.4	0.62	0.1	0.15	0.7	0.76	0.03	0.4	0.3	0.83	0.01	0.49	0.2	-0.18	0.7	0.41	0.3	0.5	0.2	-0.046	0.9	-0.037	0.9	-0.36	0.4	-0.91	0.002	-0.43	0.3	-0.26	0.5	-0.72	0.04	-0.48
Acacetin C-hexoside	0.096	0.8	-0.11	0.8	-0.14	0.7	-0.0035	1	-0.19	0.7	-0.69	0.06	-0.19	0.7	0.5	0.2	0.88	0.004	0.71	0.05	0.25	0.6	-0.35	0.4	0.25	0.5	0.41	0.3	-0.5	0.2	-0.25	0.6	0.29	0.5	0.43	0.3	0.68	0.06	0.042	0.9	-0.73	0.04	-0.82	0.01	-0.41	0.3	-0.24	0.6	-0.68
Acetylcholine	0.17	0.7	0.71	0.05	0.41	0.3	0.4	0.3	0.24	0.6	0.075	0.9	0.23	0.6	0.31	0.5	0.67	0.07	0.16	0.7	0.77	0.03	0.29	0.5	0.8	0.02	0.49	0.2	-0.13	0.8	0.41	0.3	0.51	0.2	-0.0042	1	0.055	0.9	-0.27	0.5	-0.93	0.0007	-0.54	0.2	-0.31	0.5	-0.76	0.03	-0.51
Acid orange 20	0.089	0.8	0.11	0.8	0.024	1	0.1	0.8	-0.018	1	-0.54	0.2	-0.062	0.9	0.5	0.2	0.91	0.002	0.67	0.07	0.36	0.4	-0.2	0.6	0.43	0.3	0.48	0.2	-0.5	0.2	-0.094	0.8	0.4	0.3	0.34	0.4	0.58	0.1	-0.048	0.9	-0.87	0.005	-0.81	0.01	-0.39	0.3	-0.34	0.4	-0.71
Anisic acid O-feruloyl hexoside	-0.1	0.8	-0.21	0.6	-0.12	0.8	-0.18	0.7	-0.029	0.9	0.42	0.3	-0.082	0.8	-0.37	0.4	-0.89	0.003	-0.58	0.1	-0.38	0.4	0.23	0.6	-0.47	0.2	-0.43	0.3	0.39	0.3	-0.052	0.9	-0.46	0.3	-0.24	0.6	-0.55	0.2	0.00062	1	0.91	0.002	0.86	0.007	0.41	0.3	0.39	0.3	0.67
Apigenin 6-C-hexosyl-8-C-hexosyl-O-hexoside	-0.012	1	-0.76	0.03	-0.47	0.2	-0.36	0.4	-0.34	0.4	-0.14	0.7	-0.32	0.4	-0.2	0.6	-0.57	0.1	-0.14	0.7	-0.68	0.06	-0.28	0.5	-0.82	0.01	-0.41	0.3	0.094	0.8	-0.53	0.2	-0.62	0.1	0.084	0.8	-0.07	0.9	0.2	0.6	0.93	0.0009	0.52	0.2	0.23	0.6	0.62	0.1	0.5
Apigenin 6-C-pentoside	0.12	0.8	-0.35	0.4	-0.16	0.7	-0.12	0.8	-0.032	0.9	0.35	0.4	-0.089	0.8	-0.31	0.5	-0.76	0.03	-0.44	0.3	-0.51	0.2	0.15	0.7	-0.59	0.1	-0.35	0.4	0.26	0.5	-0.26	0.5	-0.63	0.1	-0.15	0.7	-0.53	0.2	-0.041	0.9	0.96	0.0001	0.83	0.01	0.37	0.4	0.38	0.3	0.72
Apigenin 7-O-glucoside (Cosmosiin)	0.09	0.8	0.85	0.007	0.48	0.2	0.42	0.3	0.34	0.4	0.27	0.5	0.18	0.7	0.35	0.4	0.44	0.3	-0.046	0.9	0.84	0.008	0.56	0.1	0.81	0.01	0.42	0.3	-0.078	0.9	0.43	0.3	0.4	0.3	-0.14	0.7	-0.25	0.6	-0.46	0.2	-0.77	0.02	-0.22	0.6	-0.23	0.6	-0.77	0.02	-0.34
Apigenin 7-O-neohesperidoside (Rhoifolin)	0.11	0.8	0.88	0.004	0.58	0.1	0.45	0.3	0.41	0.3	0.42	0.3	0.28	0.5	0.2	0.6	0.32	0.4	-0.15	0.7	0.77	0.03	0.6	0.1	0.8	0.02	0.36	0.4	0.0026	1	0.53	0.2	0.39	0.3	-0.2	0.6	-0.33	0.4	-0.43	0.3	-0.7	0.05	-0.13	0.8	-0.12	0.8	-0.75	0.03	-0.26
Apigenin 7-rutinoside (Isorhoifolin)	0.13	0.8	0.87	0.004	0.58	0.1	0.45	0.3	0.42	0.3	0.41	0.3	0.29	0.5	0.21	0.6	0.34	0.4	-0.13	0.8	0.76	0.03	0.61	0.1	0.81	0.02	0.39	0.3	-0.019	1	0.51	0.2	0.39	0.3	-0.18	0.7	-0.33	0.4	-0.44	0.3	-0.71	0.05	-0.13	0.8	-0.12	0.8	-0.75	0.03	-0.27
Apigenin 8-C-pentoside	-0.093	0.8	-0.33	0.4	-0.097	0.8	-0.11	0.8	0.051	0.9	0.33	0.4	0.021	1	-0.37	0.4	-0.8	0.02	-0.41	0.3	-0.61	0.1	-0.011	1	-0.67	0.07	-0.51	0.2	0.19	0.6	-0.23	0.6	-0.59	0.1	-0.32	0.4	-0.47	0.2	0.0037	1	0.94	0.0006	0.75	0.03	0.27	0.5	0.55	0.2	0.75
Apigenin O-malonylhexoside	0.12	0.8	0.92	0.001	0.59	0.1	0.49	0.2	0.48	0.2	0.57	0.1	0.34	0.4	0.13	0.8	0.16	0.7	-0.26	0.5	0.71	0.05	0.68	0.06	0.74	0.04	0.31	0.5	0.076	0.9	0.54	0.2	0.3	0.5	-0.32	0.4	-0.51	0.2	-0.49	0.2	-0.54	0.2	0.056	0.9	-0.079	0.9	-0.69	0.06	-0.075
Aspartic acid di-O-glucoside	-0.081	0.8	-0.63	0.09	-0.36	0.4	-0.33	0.4	-0.25	0.5	0.076	0.9	-0.15	0.7	-0.43	0.3	-0.75	0.03	-0.33	0.4	-0.7	0.05	-0.24	0.6	-0.78	0.02	-0.52	0.2	0.3	0.5	-0.29	0.5	-0.52	0.2	-0.07	0.9	-0.16	0.7	0.29	0.5	0.98	2e-05	0.59	0.1	0.33	0.4	0.65	0.08	0.6
Baicalein-7-O-glucuronide (Baicalin)	0.11	0.8	0.26	0.5	0.085	0.8	0.16	0.7	0.021	1	-0.42	0.3	-0.01	1	0.47	0.2	0.89	0.003	0.58	0.1	0.5	0.2	-0.08	0.9	0.58	0.1	0.53	0.2	-0.39	0.3	0.055	0.9	0.49	0.2	0.31	0.5	0.5	0.2	-0.076	0.9	-0.94	0.0006	-0.79	0.02	-0.37	0.4	-0.46	0.3	-0.72
Biochanin A	0.11	0.8	0.77	0.03	0.43	0.3	0.39	0.3	0.34	0.4	0.12	0.8	0.21	0.6	0.37	0.4	0.62	0.1	0.18	0.7	0.76	0.03	0.42	0.3	0.85	0.007	0.52	0.2	-0.19	0.7	0.4	0.3	0.51	0.2	-0.014	1	-0.033	0.9	-0.36	0.4	-0.91	0.002	-0.42	0.3	-0.24	0.6	-0.71	0.05	-0.5
Biotin	0.17	0.7	0.68	0.06	0.36	0.4	0.34	0.4	0.36	0.4	0.038	0.9	0.092	0.8	0.51	0.2	0.68	0.06	0.32	0.4	0.71	0.05	0.5	0.2	0.87	0.005	0.65	0.08	-0.32	0.4	0.25	0.5	0.46	0.3	0.13	0.8	-0.031	0.9	-0.43	0.3	-0.88	0.004	-0.35	0.4	-0.18	0.7	-0.67	0.07	-0.55
Caffeate	0.099	0.8	0.85	0.008	0.54	0.2	0.41	0.3	0.41	0.3	0.35	0.4	0.29	0.5	0.21	0.6	0.4	0.3	-0.05	0.9	0.75	0.03	0.56	0.1	0.85	0.008	0.42	0.3	-0.027	0.9	0.54	0.2	0.48	0.2	-0.13	0.8	-0.23	0.6	-0.37	0.4	-0.77	0.03	-0.21	0.6	-0.11	0.8	-0.71	0.05	-0.35
Caffeic aldehyde	0.21	0.6	0.79	0.02	0.52	0.2	0.47	0.2	0.4	0.3	0.2	0.6	0.23	0.6	0.38	0.4	0.6	0.1	0.13	0.8	0.75	0.03	0.49	0.2	0.82	0.01	0.52	0.2	-0.22	0.6	0.35	0.4	0.4	0.3	-0.055	0.9	-0.15	0.7	-0.46	0.3	-0.86	0.006	-0.33	0.4	-0.24	0.6	-0.77	0.03	-0.41
Calycosin	0.16	0.7	0.82	0.01	0.51	0.2	0.42	0.3	0.4	0.3	0.28	0.5	0.19	0.7	0.37	0.4	0.47	0.2	0.027	0.9	0.78	0.02	0.61	0.1	0.84	0.009	0.5	0.2	-0.15	0.7	0.39	0.3	0.39	0.3	-0.067	0.9	-0.26	0.5	-0.49	0.2	-0.77	0.03	-0.18	0.7	-0.15	0.7	-0.75	0.03	-0.37
C-hexosyl-chrysoeriol O-rutinoside	0.087	0.8	0.75	0.03	0.44	0.3	0.33	0.4	0.35	0.4	0.16	0.7	0.15	0.7	0.36	0.4	0.54	0.2	0.13	0.8	0.75	0.03	0.53	0.2	0.88	0.004	0.53	0.2	-0.17	0.7	0.42	0.3	0.51	0.2	0.041	0.9	-0.084	0.8	-0.37	0.4	-0.85	0.007	-0.3	0.5	-0.12	0.8	-0.69	0.06	-0.51
C-hexosyl-luteolin O-hexosyl-O-pentoside	-0.11	0.8	-0.35	0.4	-0.23	0.6	-0.24	0.6	-0.049	0.9	0.34	0.4	-0.052	0.9	-0.43	0.3	-0.88	0.004	-0.46	0.2	-0.56	0.1	0.061	0.9	-0.57	0.1	-0.45	0.3	0.38	0.4	-0.11	0.8	-0.45	0.3	-0.2	0.6	-0.42	0.3	0.13	0.8	0.97	0.0001	0.79	0.02	0.42	0.3	0.56	0.1	0.68
Chrysoeriol	0.12	0.8	0.76	0.03	0.42	0.3	0.39	0.3	0.33	0.4	0.11	0.8	0.21	0.6	0.37	0.4	0.63	0.09	0.19	0.7	0.76	0.03	0.4	0.3	0.85	0.007	0.53	0.2	-0.18	0.7	0.4	0.3	0.52	0.2	-0.012	1	-0.015	1	-0.35	0.4	-0.92	0.001	-0.44	0.3	-0.26	0.5	-0.71	0.05	-0.5
Chrysoeriol 6-C-hexoside 8-C-hexoside-O-hexoside	-0.11	0.8	-0.61	0.1	-0.37	0.4	-0.29	0.5	-0.2	0.6	0.043	0.9	-0.1	0.8	-0.38	0.4	-0.7	0.05	-0.24	0.6	-0.73	0.04	-0.31	0.5	-0.8	0.02	-0.51	0.2	0.21	0.6	-0.34	0.4	-0.53	0.2	-0.13	0.8	-0.14	0.7	0.25	0.6	0.95	0.0004	0.54	0.2	0.23	0.6	0.7	0.05	0.63
Chrysoeriol 6-C-pentosyl-O-rutinoside	0.13	0.8	0.83	0.01	0.47	0.2	0.4	0.3	0.37	0.4	0.29	0.5	0.19	0.7	0.34	0.4	0.44	0.3	-0.0056	1	0.8	0.02	0.61	0.1	0.86	0.007	0.49	0.2	-0.082	0.8	0.44	0.3	0.43	0.3	-0.071	0.9	-0.25	0.5	-0.45	0.3	-0.76	0.03	-0.18	0.7	-0.14	0.7	-0.75	0.03	-0.36
Chrysoeriol 7-O-hexoside	0.21	0.6	0.77	0.03	0.44	0.3	0.43	0.3	0.32	0.4	0.16	0.7	0.17	0.7	0.41	0.3	0.61	0.1	0.12	0.8	0.8	0.02	0.49	0.2	0.84	0.009	0.55	0.2	-0.17	0.7	0.36	0.4	0.42	0.3	-0.0027	1	-0.13	0.8	-0.43	0.3	-0.86	0.006	-0.34	0.4	-0.24	0.6	-0.79	0.02	-0.44
Chrysoeriol 7-O-rutinoside	0.13	0.8	0.87	0.005	0.53	0.2	0.44	0.3	0.42	0.3	0.38	0.3	0.27	0.5	0.25	0.6	0.37	0.4	-0.076	0.9	0.77	0.03	0.61	0.1	0.84	0.009	0.44	0.3	-0.028	0.9	0.5	0.2	0.42	0.3	-0.15	0.7	-0.31	0.5	-0.44	0.3	-0.72	0.04	-0.14	0.7	-0.12	0.8	-0.73	0.04	-0.29
Chrysoeriol 8-C-pentosyl-O-rutinoside	-0.11	0.8	-0.86	0.006	-0.58	0.1	-0.41	0.3	-0.44	0.3	-0.45	0.3	-0.27	0.5	-0.18	0.7	-0.27	0.5	0.16	0.7	-0.72	0.04	-0.66	0.07	-0.8	0.02	-0.38	0.4	-7.9e-05	1	-0.52	0.2	-0.39	0.3	0.17	0.7	0.37	0.4	0.44	0.3	0.65	0.08	0.046	0.9	0.036	0.9	0.71	0.05	0.25
Chrysoeriol C-hexosyl-O-rhamnoside	0.14	0.7	-0.22	0.6	-0.27	0.5	-0.02	1	-0.2	0.6	-0.74	0.04	-0.22	0.6	0.54	0.2	0.85	0.007	0.78	0.02	0.12	0.8	-0.41	0.3	0.12	0.8	0.41	0.3	-0.54	0.2	-0.4	0.3	0.17	0.7	0.44	0.3	0.67	0.07	0.031	0.9	-0.59	0.1	-0.75	0.03	-0.43	0.3	-0.11	0.8	-0.57
Chrysoeriol O-acetylhexoside	-0.22	0.6	-0.53	0.2	-0.27	0.5	-0.33	0.4	-0.12	0.8	0.15	0.7	-0.078	0.9	-0.45	0.3	-0.82	0.01	-0.33	0.4	-0.73	0.04	-0.19	0.7	-0.73	0.04	-0.56	0.2	0.25	0.5	-0.22	0.6	-0.46	0.2	-0.17	0.7	-0.21	0.6	0.25	0.6	0.95	0.0002	0.64	0.09	0.36	0.4	0.73	0.04	0.61
Chrysoeriol O-glucuronic acid	0.086	0.8	0.26	0.5	0.058	0.9	0.14	0.7	-0.073	0.9	-0.45	0.3	-0.05	0.9	0.46	0.2	0.88	0.004	0.51	0.2	0.56	0.1	-0.11	0.8	0.55	0.2	0.48	0.2	-0.33	0.4	0.071	0.9	0.49	0.2	0.29	0.5	0.52	0.2	-0.05	0.9	-0.94	0.0006	-0.82	0.01	-0.42	0.3	-0.51	0.2	-0.72
Chrysoeriol O-hexosyl-O-hexoside	0.051	0.9	0.79	0.02	0.4	0.3	0.32	0.4	0.38	0.4	0.23	0.6	0.19	0.7	0.32	0.4	0.46	0.3	0.1	0.8	0.74	0.03	0.57	0.1	0.92	0.001	0.54	0.2	-0.084	0.8	0.49	0.2	0.56	0.1	0.0041	1	-0.12	0.8	-0.35	0.4	-0.81	0.01	-0.24	0.6	-0.071	0.9	-0.64	0.09	-0.47
Chrysoeriol O-hexosyl-O-pentoside	0.15	0.7	0.86	0.006	0.51	0.2	0.41	0.3	0.51	0.2	0.44	0.3	0.28	0.5	0.23	0.6	0.32	0.4	-0.036	0.9	0.68	0.06	0.7	0.06	0.87	0.004	0.5	0.2	-0.035	0.9	0.51	0.2	0.43	0.3	-0.11	0.8	-0.35	0.4	-0.44	0.3	-0.66	0.07	-0.038	0.9	0.0063	1	-0.65	0.08	-0.27
Chrysoeriol O-malonylhexoside	0.1	0.8	0.88	0.004	0.57	0.1	0.42	0.3	0.47	0.2	0.56	0.1	0.28	0.5	0.14	0.7	0.12	0.8	-0.27	0.5	0.7	0.06	0.73	0.04	0.75	0.03	0.32	0.4	0.08	0.9	0.53	0.2	0.31	0.5	-0.25	0.6	-0.51	0.2	-0.47	0.2	-0.5	0.2	0.11	0.8	0.0097	1	-0.67	0.07	-0.11
Chrysoeriol O-rhamnosyl-O-glucuronic acid	0.14	0.7	0.74	0.04	0.46	0.2	0.41	0.3	0.31	0.4	0.1	0.8	0.24	0.6	0.33	0.4	0.66	0.08	0.18	0.7	0.74	0.04	0.34	0.4	0.81	0.01	0.49	0.2	-0.19	0.7	0.4	0.3	0.51	0.2	-0.025	1	0.019	1	-0.32	0.4	-0.93	0.0007	-0.49	0.2	-0.28	0.5	-0.73	0.04	-0.5
Coixol	-0.092	0.8	-0.86	0.006	-0.55	0.2	-0.41	0.3	-0.42	0.3	-0.39	0.3	-0.26	0.5	-0.22	0.6	-0.34	0.4	0.1	0.8	-0.76	0.03	-0.62	0.1	-0.83	0.01	-0.41	0.3	0.014	1	-0.53	0.2	-0.44	0.3	0.15	0.7	0.3	0.5	0.42	0.3	0.71	0.05	0.13	0.8	0.085	0.8	0.72	0.05	0.3
Coumarin	-0.052	0.9	0.29	0.5	0.29	0.5	0.097	0.8	0.27	0.5	0.71	0.05	0.13	0.8	-0.29	0.5	-0.75	0.03	-0.69	0.06	-0.011	1	0.58	0.1	-0.06	0.9	-0.27	0.5	0.36	0.4	0.24	0.6	-0.28	0.5	-0.4	0.3	-0.79	0.02	-0.27	0.5	0.55	0.2	0.83	0.01	0.37	0.4	0.0016	1	0.57
Cyclic AMP	0.13	0.8	0.73	0.04	0.42	0.3	0.37	0.4	0.33	0.4	0.093	0.8	0.2	0.6	0.37	0.4	0.65	0.08	0.22	0.6	0.73	0.04	0.4	0.3	0.86	0.007	0.55	0.2	-0.2	0.6	0.39	0.3	0.53	0.2	0.033	0.9	0.01	1	-0.33	0.4	-0.92	0.001	-0.44	0.3	-0.22	0.6	-0.69	0.06	-0.53
D(-)-Threose	0.014	1	0.86	0.006	0.71	0.05	0.53	0.2	0.36	0.4	0.32	0.4	0.41	0.3	0.11	0.8	0.42	0.3	-0.16	0.7	0.73	0.04	0.28	0.5	0.63	0.1	0.15	0.7	-0.058	0.9	0.52	0.2	0.37	0.4	-0.38	0.4	-0.18	0.7	-0.35	0.4	-0.81	0.02	-0.4	0.3	-0.38	0.4	-0.75	0.03	-0.26
D-(+)-Glucono-1,5-lactone	-0.18	0.7	-0.48	0.2	-0.21	0.6	-0.26	0.5	-0.12	0.8	0.23	0.6	-0.0087	1	-0.52	0.2	-0.85	0.008	-0.44	0.3	-0.69	0.06	-0.19	0.6	-0.74	0.04	-0.6	0.1	0.34	0.4	-0.15	0.7	-0.48	0.2	-0.24	0.6	-0.26	0.5	0.26	0.5	0.96	0.0002	0.63	0.09	0.33	0.4	0.65	0.08	0.67
D-(+)-Mannose	-0.076	0.9	-0.83	0.01	-0.54	0.2	-0.39	0.3	-0.41	0.3	-0.31	0.5	-0.23	0.6	-0.28	0.5	-0.41	0.3	0.014	1	-0.75	0.03	-0.59	0.1	-0.84	0.009	-0.44	0.3	0.1	0.8	-0.47	0.2	-0.45	0.3	0.1	0.8	0.24	0.6	0.43	0.3	0.77	0.02	0.19	0.7	0.11	0.8	0.71	0.05	0.38
D(+)-Melezitose O-rhamnoside	0.047	0.9	0.1	0.8	0.13	0.8	0.033	0.9	0.2	0.6	0.68	0.06	0.1	0.8	-0.37	0.4	-0.8	0.02	-0.65	0.08	-0.2	0.6	0.48	0.2	-0.2	0.6	-0.28	0.5	0.41	0.3	0.14	0.7	-0.37	0.4	-0.32	0.4	-0.75	0.03	-0.16	0.7	0.73	0.04	0.89	0.003	0.44	0.3	0.14	0.7	0.66
D-(+)-Sucrose	-0.18	0.7	-0.62	0.1	-0.28	0.5	-0.31	0.5	-0.22	0.6	0.051	0.9	-0.1	0.8	-0.44	0.3	-0.75	0.03	-0.33	0.4	-0.73	0.04	-0.33	0.4	-0.84	0.009	-0.62	0.1	0.23	0.6	-0.3	0.5	-0.53	0.2	-0.17	0.7	-0.13	0.8	0.28	0.5	0.94	0.0005	0.52	0.2	0.25	0.6	0.69	0.06	0.6
Daphnetin	-0.069	0.9	-0.37	0.4	-0.18	0.7	-0.21	0.6	-0.0058	1	0.35	0.4	-0.029	0.9	-0.43	0.3	-0.86	0.006	-0.44	0.3	-0.61	0.1	0.058	0.9	-0.6	0.1	-0.45	0.3	0.32	0.4	-0.15	0.7	-0.5	0.2	-0.2	0.6	-0.44	0.3	0.1	0.8	0.98	4e-05	0.8	0.02	0.43	0.3	0.57	0.1	0.7
D-erythro-Dihydrosphingosine	0.14	0.7	-0.67	0.07	-0.48	0.2	-0.22	0.6	-0.35	0.4	-0.086	0.8	-0.22	0.6	-0.21	0.6	-0.49	0.2	-0.17	0.7	-0.6	0.1	-0.34	0.4	-0.8	0.02	-0.36	0.4	0.18	0.7	-0.5	0.2	-0.63	0.09	0.0031	1	-0.1	0.8	0.19	0.7	0.89	0.003	0.43	0.3	0.094	0.8	0.5	0.2	0.59
D-erythro-sphinganine	0.16	0.7	-0.64	0.09	-0.46	0.3	-0.2	0.6	-0.33	0.4	-0.049	0.9	-0.21	0.6	-0.21	0.6	-0.51	0.2	-0.19	0.6	-0.58	0.1	-0.29	0.5	-0.79	0.02	-0.36	0.4	0.19	0.7	-0.49	0.2	-0.65	0.08	-0.014	1	-0.15	0.7	0.15	0.7	0.9	0.002	0.47	0.2	0.1	0.8	0.47	0.2	0.62
D-Fructose 6-phosphate-disodium salt	-0.067	0.9	-0.78	0.02	-0.46	0.2	-0.39	0.3	-0.29	0.5	-0.15	0.7	-0.23	0.6	-0.29	0.5	-0.57	0.1	-0.07	0.9	-0.79	0.02	-0.38	0.4	-0.82	0.01	-0.43	0.3	0.093	0.8	-0.48	0.2	-0.53	0.2	0.073	0.9	0.026	1	0.31	0.5	0.9	0.002	0.44	0.3	0.26	0.5	0.73	0.04	0.48
D-Glucose 6-phosphate	-0.091	0.8	-0.77	0.03	-0.47	0.2	-0.4	0.3	-0.27	0.5	-0.15	0.7	-0.25	0.6	-0.27	0.5	-0.58	0.1	-0.068	0.9	-0.79	0.02	-0.34	0.4	-0.81	0.02	-0.42	0.3	0.082	0.8	-0.48	0.2	-0.53	0.2	0.073	0.9	0.0047	1	0.28	0.5	0.91	0.002	0.48	0.2	0.28	0.5	0.75	0.03	0.48
Dihydrojasmone	0.016	1	-0.61	0.1	-0.41	0.3	-0.25	0.5	-0.26	0.5	-0.027	0.9	-0.27	0.5	-0.15	0.7	-0.61	0.1	-0.22	0.6	-0.59	0.1	-0.17	0.7	-0.79	0.02	-0.4	0.3	0.11	0.8	-0.51	0.2	-0.67	0.07	-0.042	0.9	-0.23	0.6	0.064	0.9	0.94	0.0004	0.61	0.1	0.17	0.7	0.54	0.2	0.61
Di-O-methylquercetin	0.15	0.7	0.53	0.2	0.3	0.5	0.32	0.4	0.23	0.6	-0.18	0.7	0.1	0.8	0.49	0.2	0.84	0.009	0.45	0.3	0.64	0.09	0.18	0.7	0.73	0.04	0.56	0.1	-0.39	0.3	0.17	0.7	0.47	0.2	0.15	0.7	0.23	0.6	-0.28	0.5	-0.98	3e-05	-0.64	0.09	-0.35	0.4	-0.62	0.1	-0.63
Diosmin	0.11	0.8	0.87	0.005	0.52	0.2	0.42	0.3	0.42	0.3	0.39	0.3	0.27	0.5	0.23	0.6	0.35	0.4	-0.081	0.8	0.76	0.03	0.61	0.1	0.85	0.008	0.43	0.3	-0.0048	1	0.53	0.2	0.45	0.3	-0.15	0.7	-0.29	0.5	-0.41	0.3	-0.72	0.04	-0.15	0.7	-0.1	0.8	-0.72	0.05	-0.3
D-Pantothenic dcid	0.12	0.8	0.53	0.2	0.28	0.5	0.31	0.5	0.12	0.8	-0.21	0.6	0.061	0.9	0.49	0.2	0.83	0.01	0.36	0.4	0.72	0.04	0.13	0.8	0.69	0.06	0.5	0.2	-0.32	0.4	0.19	0.7	0.46	0.2	0.13	0.8	0.25	0.5	-0.26	0.5	-0.98	1e-05	-0.68	0.06	-0.42	0.3	-0.68	0.06	-0.63
Dulcitol	-0.02	1	-0.76	0.03	-0.53	0.2	-0.38	0.4	-0.37	0.4	-0.13	0.8	-0.26	0.5	-0.28	0.5	-0.58	0.1	-0.14	0.7	-0.7	0.05	-0.35	0.4	-0.8	0.02	-0.41	0.3	0.2	0.6	-0.44	0.3	-0.53	0.2	0.079	0.9	0.00039	1	0.31	0.4	0.92	0.001	0.45	0.3	0.24	0.6	0.66	0.08	0.5
D-Xylonic acid	-0.16	0.7	-0.63	0.09	-0.5	0.2	-0.36	0.4	-0.23	0.6	-0.035	0.9	-0.12	0.8	-0.36	0.4	-0.66	0.07	-0.14	0.7	-0.73	0.04	-0.35	0.4	-0.73	0.04	-0.44	0.3	0.25	0.5	-0.3	0.5	-0.4	0.3	-0.063	0.9	-0.021	1	0.35	0.4	0.9	0.003	0.46	0.3	0.25	0.6	0.78	0.02	0.54
Eriocitrin	0.073	0.9	0.89	0.003	0.76	0.03	0.56	0.2	0.49	0.2	0.44	0.3	0.45	0.3	0.11	0.8	0.36	0.4	-0.17	0.7	0.67	0.07	0.42	0.3	0.66	0.08	0.2	0.6	-0.094	0.8	0.51	0.2	0.32	0.4	-0.38	0.4	-0.31	0.5	-0.43	0.3	-0.73	0.04	-0.24	0.6	-0.27	0.5	-0.73	0.04	-0.19
Eriodictiol C-hexosyl-O-hexoside	-0.075	0.9	-0.41	0.3	-0.24	0.6	-0.23	0.6	-0.067	0.9	0.29	0.5	-0.072	0.9	-0.4	0.3	-0.84	0.009	-0.42	0.3	-0.61	0.1	0.0069	1	-0.64	0.09	-0.46	0.3	0.32	0.4	-0.19	0.6	-0.52	0.2	-0.18	0.7	-0.4	0.3	0.12	0.8	0.98	1e-05	0.77	0.02	0.38	0.3	0.58	0.1	0.69
Eriodictyol	-0.0039	1	-0.36	0.4	-0.21	0.6	-0.015	1	-0.075	0.9	0.24	0.6	0.2	0.6	-0.49	0.2	-0.63	0.09	-0.34	0.4	-0.64	0.09	-0.39	0.3	-0.77	0.03	-0.55	0.2	0.31	0.5	-0.19	0.7	-0.52	0.2	-0.42	0.3	-0.24	0.6	0.21	0.6	0.84	0.009	0.4	0.3	0.0072	1	0.55	0.2	0.79
Eriodictyol O-malonylhexoside	-0.2	0.6	-0.56	0.1	-0.4	0.3	-0.29	0.5	-0.25	0.5	0.012	1	-0.034	0.9	-0.45	0.3	-0.68	0.06	-0.26	0.5	-0.68	0.06	-0.44	0.3	-0.78	0.02	-0.57	0.1	0.31	0.4	-0.23	0.6	-0.41	0.3	-0.21	0.6	-0.03	0.9	0.37	0.4	0.86	0.006	0.38	0.3	0.13	0.8	0.71	0.05	0.6
Ferulic acid	0.18	0.7	0.78	0.02	0.45	0.3	0.42	0.3	0.39	0.3	0.17	0.7	0.18	0.7	0.43	0.3	0.6	0.1	0.17	0.7	0.77	0.03	0.53	0.2	0.85	0.007	0.56	0.1	-0.23	0.6	0.34	0.4	0.42	0.3	-0.0097	1	-0.14	0.7	-0.47	0.2	-0.86	0.007	-0.31	0.5	-0.22	0.6	-0.74	0.04	-0.44
Fumaric acid	0.41	0.3	0.68	0.06	0.55	0.2	0.59	0.1	0.36	0.4	0.096	0.8	0.18	0.7	0.53	0.2	0.76	0.03	0.21	0.6	0.71	0.05	0.39	0.3	0.62	0.1	0.51	0.2	-0.43	0.3	0.061	0.9	0.12	0.8	-0.058	0.9	-0.19	0.7	-0.62	0.1	-0.82	0.01	-0.37	0.4	-0.43	0.3	-0.86	0.006	-0.32
Galactinol	-0.14	0.7	-0.7	0.05	-0.48	0.2	-0.42	0.3	-0.28	0.5	-0.038	0.9	-0.23	0.6	-0.35	0.4	-0.71	0.05	-0.2	0.6	-0.73	0.04	-0.26	0.5	-0.75	0.03	-0.45	0.3	0.24	0.6	-0.34	0.4	-0.46	0.2	0.037	0.9	-0.063	0.9	0.32	0.4	0.96	0.0002	0.56	0.1	0.36	0.4	0.74	0.04	0.51
Gallocatechin-catechin	0.11	0.8	0.88	0.004	0.59	0.1	0.45	0.3	0.44	0.3	0.4	0.3	0.29	0.5	0.23	0.6	0.36	0.4	-0.098	0.8	0.75	0.03	0.6	0.1	0.8	0.02	0.39	0.3	-0.059	0.9	0.49	0.2	0.39	0.3	-0.19	0.7	-0.32	0.4	-0.46	0.3	-0.72	0.04	-0.14	0.7	-0.13	0.8	-0.73	0.04	-0.28
Genistein 7-O-Glucoside (Genistin)	0.11	0.8	0.87	0.005	0.52	0.2	0.42	0.3	0.44	0.3	0.36	0.4	0.28	0.5	0.25	0.5	0.4	0.3	-0.026	1	0.75	0.03	0.59	0.1	0.86	0.006	0.46	0.3	-0.048	0.9	0.51	0.2	0.46	0.2	-0.13	0.8	-0.26	0.5	-0.41	0.3	-0.76	0.03	-0.18	0.7	-0.11	0.8	-0.71	0.05	-0.33
Gluconic acid	-0.11	0.8	-0.6	0.1	-0.32	0.4	-0.32	0.4	-0.21	0.6	0.11	0.8	-0.13	0.8	-0.43	0.3	-0.78	0.02	-0.34	0.4	-0.71	0.05	-0.22	0.6	-0.78	0.02	-0.54	0.2	0.28	0.5	-0.28	0.5	-0.53	0.2	-0.1	0.8	-0.19	0.6	0.26	0.5	0.98	2e-05	0.61	0.1	0.33	0.4	0.66	0.08	0.62
Glucose-1-phosphate	-0.17	0.7	-0.75	0.03	-0.5	0.2	-0.43	0.3	-0.37	0.4	-0.12	0.8	-0.2	0.6	-0.41	0.3	-0.65	0.08	-0.19	0.6	-0.73	0.04	-0.44	0.3	-0.81	0.01	-0.52	0.2	0.27	0.5	-0.32	0.4	-0.43	0.3	0.011	1	0.071	0.9	0.43	0.3	0.9	0.002	0.39	0.3	0.25	0.5	0.74	0.04	0.48
Glycitein	0.1	0.8	0.89	0.003	0.56	0.1	0.44	0.3	0.45	0.3	0.48	0.2	0.3	0.5	0.18	0.7	0.25	0.6	-0.17	0.7	0.74	0.04	0.66	0.07	0.81	0.02	0.37	0.4	0.037	0.9	0.55	0.2	0.39	0.3	-0.22	0.6	-0.39	0.3	-0.44	0.3	-0.63	0.09	-0.037	0.9	-0.062	0.9	-0.7	0.05	-0.21
Gossypitrin	-0.32	0.4	-0.54	0.2	-0.36	0.4	-0.48	0.2	-0.2	0.6	0.058	0.9	-0.33	0.4	-0.28	0.5	-0.85	0.008	-0.33	0.4	-0.57	0.1	0.034	0.9	-0.59	0.1	-0.45	0.3	0.23	0.6	-0.24	0.6	-0.4	0.3	0.024	1	-0.23	0.6	0.18	0.7	0.93	0.0009	0.75	0.03	0.49	0.2	0.67	0.07	0.44
Guanidinoethyl sulfonate	-0.3	0.5	-0.62	0.1	-0.65	0.08	-0.43	0.3	-0.56	0.1	-0.3	0.5	-0.26	0.5	-0.29	0.5	-0.5	0.2	-0.17	0.7	-0.44	0.3	-0.57	0.1	-0.69	0.06	-0.49	0.2	0.37	0.4	-0.22	0.6	-0.22	0.6	-0.028	0.9	0.25	0.5	0.49	0.2	0.66	0.07	0.11	0.8	-0.016	1	0.62	0.1	0.33
Guanosine 3',5'-cyclic monophosphate	0.097	0.8	0.82	0.01	0.47	0.2	0.38	0.3	0.34	0.4	0.25	0.6	0.2	0.6	0.3	0.5	0.47	0.2	0.013	1	0.8	0.02	0.53	0.2	0.86	0.007	0.47	0.2	-0.069	0.9	0.48	0.2	0.49	0.2	-0.064	0.9	-0.16	0.7	-0.38	0.4	-0.82	0.01	-0.28	0.5	-0.16	0.7	-0.74	0.04	-0.42
Hesperetin 7-O-neohesperidoside (Neohesperidin)	0.089	0.8	0.79	0.02	0.48	0.2	0.37	0.4	0.35	0.4	0.21	0.6	0.2	0.6	0.32	0.4	0.51	0.2	0.061	0.9	0.78	0.02	0.51	0.2	0.85	0.007	0.47	0.2	-0.12	0.8	0.45	0.3	0.49	0.2	-0.041	0.9	-0.12	0.8	-0.38	0.4	-0.85	0.008	-0.31	0.5	-0.16	0.7	-0.72	0.04	-0.46
Hesperetin 7-rutinoside (Hesperidin)	0.088	0.8	0.82	0.01	0.53	0.2	0.41	0.3	0.37	0.4	0.25	0.6	0.24	0.6	0.29	0.5	0.49	0.2	0.024	1	0.77	0.02	0.49	0.2	0.83	0.01	0.43	0.3	-0.11	0.8	0.47	0.2	0.48	0.2	-0.099	0.8	-0.15	0.7	-0.38	0.3	-0.84	0.009	-0.31	0.5	-0.19	0.6	-0.74	0.04	-0.42
Isoacteoside	0.045	0.9	0.17	0.7	0.017	1	0.093	0.8	-0.017	1	-0.5	0.2	-0.029	0.9	0.45	0.3	0.88	0.004	0.63	0.09	0.41	0.3	-0.18	0.7	0.51	0.2	0.48	0.2	-0.41	0.3	0.015	1	0.49	0.2	0.32	0.4	0.59	0.1	-0.0026	1	-0.9	0.002	-0.83	0.01	-0.37	0.4	-0.35	0.4	-0.73
Isorhamnetin 3-O-glucoside	0.18	0.7	0.42	0.3	0.2	0.6	0.25	0.6	0.08	0.9	-0.28	0.5	-0.0013	1	0.51	0.2	0.87	0.005	0.45	0.3	0.65	0.08	0.12	0.8	0.69	0.06	0.58	0.1	-0.35	0.4	0.12	0.8	0.46	0.3	0.26	0.5	0.32	0.4	-0.22	0.6	-0.96	0.0002	-0.68	0.06	-0.35	0.4	-0.64	0.09	-0.68
Isorhamnetin 3-O-neohesperidoside	0.25	0.5	0.9	0.003	0.67	0.07	0.56	0.1	0.61	0.1	0.55	0.2	0.43	0.3	0.16	0.7	0.32	0.4	-0.088	0.8	0.61	0.1	0.65	0.08	0.77	0.02	0.41	0.3	-0.087	0.8	0.47	0.2	0.29	0.5	-0.25	0.5	-0.45	0.3	-0.51	0.2	-0.62	0.1	-0.026	1	-0.069	0.9	-0.69	0.06	-0.13
Isorhamnetin 5-O-hexoside	0.12	0.8	0.44	0.3	0.21	0.6	0.22	0.6	0.21	0.6	-0.24	0.6	0.067	0.9	0.48	0.2	0.84	0.009	0.54	0.2	0.54	0.2	0.15	0.7	0.74	0.03	0.61	0.1	-0.4	0.3	0.16	0.7	0.54	0.2	0.26	0.5	0.32	0.4	-0.19	0.6	-0.96	0.0002	-0.64	0.09	-0.25	0.6	-0.51	0.2	-0.7
Isorhamnetin O-hexoside	0.016	1	0.46	0.3	0.22	0.6	0.17	0.7	0.11	0.8	-0.23	0.6	0.065	0.9	0.37	0.4	0.77	0.03	0.4	0.3	0.62	0.1	0.1	0.8	0.74	0.03	0.5	0.2	-0.25	0.5	0.3	0.5	0.62	0.1	0.22	0.6	0.38	0.4	-0.086	0.8	-0.98	2e-05	-0.7	0.05	-0.26	0.5	-0.54	0.2	-0.73
Isosakuranetin (4'-Methylnaringenin)	-0.35	0.4	0.37	0.4	0.24	0.6	-0.034	0.9	0.14	0.7	-0.24	0.6	0.094	0.8	0.17	0.7	0.52	0.2	0.35	0.4	0.4	0.3	0.0022	1	0.66	0.08	0.27	0.5	-0.21	0.6	0.42	0.3	0.75	0.03	0.16	0.7	0.49	0.2	0.11	0.8	-0.88	0.004	-0.65	0.08	-0.09	0.8	-0.22	0.6	-0.77
Isosakuranetin-7-neohesperidoside (Poncirin)	0.11	0.8	0.73	0.04	0.46	0.2	0.38	0.4	0.31	0.5	0.093	0.8	0.2	0.6	0.35	0.4	0.64	0.09	0.17	0.7	0.75	0.03	0.38	0.3	0.82	0.01	0.49	0.2	-0.2	0.6	0.39	0.3	0.5	0.2	0.007	1	0.0049	1	-0.34	0.4	-0.92	0.001	-0.45	0.3	-0.24	0.6	-0.72	0.04	-0.53
Isoschaftoside	0.076	0.9	0.88	0.004	0.55	0.2	0.42	0.3	0.44	0.3	0.4	0.3	0.27	0.5	0.23	0.6	0.32	0.4	-0.099	0.8	0.75	0.03	0.63	0.1	0.83	0.01	0.4	0.3	-0.03	0.9	0.52	0.2	0.42	0.3	-0.18	0.7	-0.33	0.4	-0.44	0.3	-0.7	0.05	-0.11	0.8	-0.1	0.8	-0.7	0.05	-0.28
Isovitexin 7-O-glucoside (Saponarin)	-0.17	0.7	-0.58	0.1	-0.31	0.4	-0.32	0.4	-0.21	0.6	0.074	0.9	-0.15	0.7	-0.38	0.3	-0.77	0.03	-0.33	0.4	-0.68	0.06	-0.23	0.6	-0.79	0.02	-0.56	0.1	0.23	0.6	-0.31	0.5	-0.54	0.2	-0.14	0.7	-0.2	0.6	0.22	0.6	0.96	0.0001	0.61	0.1	0.28	0.5	0.67	0.07	0.61
Kaempferide	0.14	0.7	0.87	0.005	0.51	0.2	0.43	0.3	0.43	0.3	0.4	0.3	0.25	0.6	0.27	0.5	0.35	0.4	-0.076	0.9	0.77	0.03	0.66	0.08	0.85	0.008	0.46	0.3	-0.024	1	0.49	0.2	0.41	0.3	-0.14	0.7	-0.34	0.4	-0.46	0.3	-0.69	0.06	-0.092	0.8	-0.092	0.8	-0.72	0.04	-0.27
Kaempferol	-0.014	1	0.72	0.05	0.45	0.3	0.35	0.4	0.33	0.4	0.032	0.9	0.22	0.6	0.36	0.4	0.64	0.09	0.23	0.6	0.69	0.06	0.29	0.5	0.79	0.02	0.43	0.3	-0.26	0.5	0.38	0.4	0.54	0.2	-0.047	0.9	0.074	0.9	-0.31	0.5	-0.95	0.0003	-0.51	0.2	-0.3	0.5	-0.62	0.1	-0.55
Kaempferol 3-O-galactoside (Trifolin)	0.099	0.8	0.84	0.01	0.65	0.08	0.48	0.2	0.4	0.3	0.31	0.5	0.35	0.4	0.19	0.7	0.47	0.2	-0.054	0.9	0.73	0.04	0.42	0.3	0.75	0.03	0.32	0.4	-0.11	0.8	0.5	0.2	0.42	0.3	-0.21	0.6	-0.18	0.7	-0.38	0.4	-0.82	0.01	-0.33	0.4	-0.24	0.6	-0.75	0.03	-0.34
Kaempferol 3-O-glucoside (Astragalin)	0.12	0.8	0.88	0.004	0.54	0.2	0.45	0.3	0.48	0.2	0.36	0.4	0.28	0.5	0.3	0.5	0.41	0.3	0.00037	1	0.74	0.04	0.61	0.1	0.84	0.008	0.46	0.2	-0.12	0.8	0.46	0.3	0.41	0.3	-0.15	0.7	-0.3	0.5	-0.48	0.2	-0.75	0.03	-0.15	0.7	-0.14	0.7	-0.7	0.05	-0.31
Kaempferol 3-O-robinobioside (Biorobin)	0.12	0.8	0.86	0.006	0.56	0.1	0.43	0.3	0.39	0.3	0.41	0.3	0.25	0.5	0.21	0.6	0.32	0.4	-0.15	0.7	0.77	0.02	0.62	0.1	0.8	0.02	0.38	0.3	0.0016	1	0.51	0.2	0.39	0.3	-0.17	0.7	-0.33	0.4	-0.44	0.3	-0.69	0.06	-0.11	0.8	-0.1	0.8	-0.75	0.03	-0.27
Kaempferol 3-O-rutinoside (Nicotiflorin)	0.14	0.7	0.87	0.005	0.54	0.2	0.45	0.3	0.4	0.3	0.39	0.3	0.24	0.6	0.26	0.5	0.35	0.4	-0.12	0.8	0.8	0.02	0.63	0.09	0.8	0.02	0.41	0.3	-0.026	1	0.47	0.2	0.36	0.4	-0.17	0.7	-0.35	0.4	-0.48	0.2	-0.69	0.06	-0.11	0.8	-0.14	0.7	-0.77	0.03	-0.26
L(-)-Malic acid	-0.044	0.9	-0.74	0.04	-0.46	0.2	-0.35	0.4	-0.3	0.5	-0.086	0.8	-0.18	0.7	-0.35	0.4	-0.6	0.1	-0.15	0.7	-0.76	0.03	-0.39	0.3	-0.82	0.01	-0.46	0.3	0.19	0.6	-0.41	0.3	-0.52	0.2	0.015	1	-0.0057	1	0.33	0.4	0.92	0.001	0.44	0.3	0.24	0.6	0.7	0.05	0.53
L(+)-Ornithine	-0.19	0.6	0.75	0.03	0.42	0.3	0.22	0.6	0.14	0.7	0.16	0.7	0.2	0.6	0.097	0.8	0.34	0.4	-0.13	0.8	0.8	0.02	0.31	0.5	0.78	0.02	0.22	0.6	0.13	0.8	0.66	0.07	0.66	0.07	-0.12	0.8	0.05	0.9	-0.1	0.8	-0.83	0.01	-0.43	0.3	-0.18	0.7	-0.63	0.1	-0.5
L-Alanine	0.21	0.6	0.48	0.2	0.34	0.4	0.31	0.5	0.24	0.6	-0.09	0.8	0.23	0.6	0.28	0.5	0.79	0.02	0.41	0.3	0.5	0.2	0.099	0.8	0.71	0.05	0.53	0.2	-0.27	0.5	0.29	0.5	0.53	0.2	0.16	0.7	0.29	0.5	-0.12	0.8	-0.94	0.0006	-0.67	0.07	-0.24	0.6	-0.56	0.1	-0.61
L-ascorbate	0.17	0.7	0.81	0.02	0.54	0.2	0.44	0.3	0.39	0.3	0.26	0.5	0.22	0.6	0.33	0.4	0.51	0.2	0.039	0.9	0.76	0.03	0.56	0.2	0.82	0.01	0.48	0.2	-0.16	0.7	0.4	0.3	0.4	0.3	-0.066	0.9	-0.21	0.6	-0.46	0.3	-0.8	0.02	-0.24	0.6	-0.17	0.7	-0.77	0.03	-0.39
L-Cysteine	0.14	0.7	0.8	0.02	0.46	0.2	0.39	0.3	0.37	0.4	0.24	0.6	0.2	0.6	0.33	0.4	0.5	0.2	0.058	0.9	0.78	0.02	0.56	0.1	0.87	0.005	0.51	0.2	-0.11	0.8	0.45	0.3	0.48	0.2	-0.028	0.9	-0.17	0.7	-0.4	0.3	-0.81	0.01	-0.25	0.5	-0.14	0.7	-0.73	0.04	-0.42
L-Dencichin	0.25	0.6	0.74	0.04	0.3	0.5	0.39	0.3	0.38	0.3	0.12	0.8	0.074	0.9	0.57	0.1	0.62	0.1	0.27	0.5	0.77	0.03	0.61	0.1	0.88	0.004	0.7	0.06	-0.28	0.5	0.21	0.6	0.37	0.4	0.085	0.8	-0.19	0.7	-0.54	0.2	-0.79	0.02	-0.21	0.6	-0.19	0.7	-0.7	0.05	-0.42
L-Homocitrulline	-0.088	0.8	-0.87	0.006	-0.53	0.2	-0.38	0.3	-0.4	0.3	-0.56	0.2	-0.36	0.4	0.0063	1	-0.14	0.7	0.28	0.5	-0.68	0.06	-0.62	0.1	-0.8	0.02	-0.31	0.5	-0.22	0.6	-0.68	0.06	-0.47	0.2	0.22	0.6	0.37	0.4	0.29	0.5	0.56	0.1	0.022	1	-0.037	0.9	0.65	0.08	0.18
Liquiritin	0.19	0.7	0.89	0.003	0.66	0.07	0.51	0.2	0.58	0.1	0.61	0.1	0.38	0.4	0.12	0.8	0.17	0.7	-0.21	0.6	0.6	0.1	0.72	0.04	0.73	0.04	0.34	0.4	-0.01	1	0.5	0.2	0.26	0.5	-0.28	0.5	-0.54	0.2	-0.52	0.2	-0.51	0.2	0.12	0.8	0.0067	1	-0.66	0.08	-0.06
L-Proline	-0.092	0.8	-0.57	0.1	-0.3	0.5	-0.28	0.5	-0.2	0.6	0.13	0.8	-0.11	0.8	-0.42	0.3	-0.77	0.03	-0.36	0.4	-0.68	0.06	-0.22	0.6	-0.79	0.02	-0.55	0.2	0.28	0.5	-0.28	0.5	-0.55	0.2	-0.15	0.7	-0.23	0.6	0.23	0.6	0.98	2e-05	0.62	0.1	0.29	0.5	0.63	0.1	0.65
lumichrome	0.091	0.8	0.86	0.006	0.55	0.2	0.41	0.3	0.41	0.3	0.36	0.4	0.26	0.5	0.24	0.6	0.37	0.4	-0.074	0.9	0.76	0.03	0.6	0.1	0.83	0.01	0.41	0.3	-0.041	0.9	0.51	0.2	0.44	0.3	-0.14	0.7	-0.27	0.5	-0.42	0.3	-0.74	0.04	-0.16	0.7	-0.11	0.8	-0.72	0.04	-0.33
Luteolin	0.14	0.7	0.71	0.05	0.42	0.3	0.41	0.3	0.3	0.5	0.014	1	0.11	0.8	0.51	0.2	0.7	0.05	0.24	0.6	0.78	0.02	0.4	0.3	0.78	0.02	0.53	0.2	-0.33	0.4	0.24	0.6	0.39	0.3	0.011	1	-0.032	0.9	-0.46	0.2	-0.92	0.001	-0.43	0.3	-0.34	0.4	-0.74	0.03	-0.51
Luteolin 6-C-hexoside 8-C-hexosyl-O-hexoside	-0.13	0.8	-0.56	0.1	-0.37	0.4	-0.26	0.5	-0.19	0.7	0.035	0.9	-0.12	0.8	-0.31	0.4	-0.69	0.06	-0.24	0.6	-0.68	0.06	-0.28	0.5	-0.79	0.02	-0.51	0.2	0.18	0.7	-0.37	0.4	-0.56	0.2	-0.17	0.7	-0.18	0.7	0.19	0.7	0.93	0.0008	0.54	0.2	0.17	0.7	0.67	0.07	0.64
Luteolin 7-O-glucoside (Cynaroside)	0.084	0.8	0.86	0.006	0.51	0.2	0.42	0.3	0.36	0.4	0.31	0.4	0.21	0.6	0.29	0.5	0.4	0.3	-0.078	0.9	0.82	0.01	0.58	0.1	0.82	0.01	0.41	0.3	-0.046	0.9	0.48	0.2	0.42	0.3	-0.15	0.7	-0.26	0.5	-0.44	0.3	-0.76	0.03	-0.19	0.6	-0.18	0.7	-0.76	0.03	-0.33
Luteolin 8-C-hexosyl-O-hexoside	0.42	0.3	-0.17	0.7	-0.22	0.6	0.082	0.8	-0.32	0.4	-0.52	0.2	-0.14	0.7	0.33	0.4	0.79	0.02	0.49	0.2	0.24	0.6	-0.35	0.4	0.14	0.7	0.41	0.3	-0.21	0.6	-0.22	0.6	0.14	0.7	0.43	0.3	0.54	0.2	0.11	0.8	-0.51	0.2	-0.71	0.05	-0.38	0.4	-0.37	0.4	-0.44
Luteolin O-hexosyl-O-hexosyl-O-hexoside	-0.049	0.9	-0.75	0.03	-0.43	0.3	-0.31	0.4	-0.26	0.5	-0.16	0.7	-0.2	0.6	-0.25	0.6	-0.52	0.2	-0.058	0.9	-0.78	0.02	-0.42	0.3	-0.86	0.006	-0.45	0.3	0.039	0.9	-0.52	0.2	-0.59	0.1	0.00083	1	0.0051	1	0.25	0.6	0.88	0.004	0.41	0.3	0.16	0.7	0.7	0.05	0.52
Luteolin O-hexosyl-O-pentoside	0.22	0.6	-0.57	0.1	-0.28	0.5	-0.13	0.8	-0.3	0.5	0.058	0.9	-0.22	0.6	-0.22	0.6	-0.54	0.2	-0.34	0.4	-0.49	0.2	-0.16	0.7	-0.78	0.02	-0.4	0.3	0.18	0.7	-0.47	0.2	-0.74	0.04	-0.051	0.9	-0.29	0.5	0.037	0.9	0.9	0.002	0.56	0.1	0.13	0.8	0.31	0.5	0.64
LysoPC 16:1	0.048	0.9	-0.5	0.2	-0.24	0.6	-0.15	0.7	-0.1	0.8	0.2	0.6	-0.071	0.9	-0.33	0.4	-0.71	0.05	-0.34	0.4	-0.65	0.08	-0.13	0.8	-0.77	0.03	-0.46	0.2	0.19	0.6	-0.36	0.4	-0.66	0.07	-0.19	0.7	-0.36	0.4	0.07	0.9	0.98	2e-05	0.68	0.06	0.24	0.6	0.54	0.2	0.73
LysoPC 16:1 (2n isomer)	0.24	0.6	0.88	0.004	0.59	0.1	0.52	0.2	0.5	0.2	0.43	0.3	0.31	0.5	0.28	0.5	0.4	0.3	-0.046	0.9	0.72	0.04	0.65	0.08	0.81	0.02	0.47	0.2	-0.11	0.8	0.42	0.3	0.31	0.5	-0.18	0.7	-0.39	0.3	-0.54	0.2	-0.69	0.06	-0.086	0.8	-0.13	0.8	-0.76	0.03	-0.22
LysoPC 16:2 (2n isomer)	0.19	0.6	0.85	0.008	0.59	0.1	0.47	0.2	0.46	0.2	0.44	0.3	0.22	0.6	0.29	0.5	0.31	0.5	-0.13	0.8	0.73	0.04	0.71	0.05	0.76	0.03	0.41	0.3	-0.1	0.8	0.39	0.3	0.25	0.5	-0.17	0.7	-0.45	0.3	-0.57	0.1	-0.61	0.1	0.016	1	-0.085	0.8	-0.76	0.03	-0.19
LysoPC 18:0 (2n isomer)	0.19	0.7	0.89	0.003	0.62	0.1	0.5	0.2	0.55	0.2	0.55	0.2	0.34	0.4	0.18	0.7	0.23	0.6	-0.16	0.7	0.66	0.07	0.71	0.05	0.77	0.03	0.39	0.3	-0.031	0.9	0.48	0.2	0.29	0.5	-0.24	0.6	-0.49	0.2	-0.52	0.2	-0.57	0.1	0.055	0.9	-0.035	0.9	-0.69	0.06	-0.12
LysoPC 18:1	0.29	0.5	0.88	0.004	0.68	0.06	0.58	0.1	0.61	0.1	0.54	0.2	0.4	0.3	0.21	0.6	0.34	0.4	-0.076	0.9	0.61	0.1	0.67	0.07	0.75	0.03	0.43	0.3	-0.14	0.7	0.4	0.3	0.23	0.6	-0.24	0.6	-0.49	0.2	-0.57	0.1	-0.61	0.1	0.0048	1	-0.081	0.8	-0.72	0.05	-0.11
LysoPC 18:1 (2n isomer)	0.2	0.6	0.9	0.003	0.62	0.1	0.5	0.2	0.56	0.2	0.56	0.1	0.36	0.4	0.17	0.7	0.23	0.6	-0.16	0.7	0.65	0.08	0.71	0.05	0.78	0.02	0.4	0.3	-0.02	1	0.49	0.2	0.29	0.5	-0.24	0.6	-0.5	0.2	-0.52	0.2	-0.56	0.1	0.058	0.9	-0.027	0.9	-0.69	0.06	-0.11
LysoPC 18:2 (2n isomer)	0.2	0.6	0.9	0.002	0.63	0.09	0.52	0.2	0.54	0.2	0.52	0.2	0.35	0.4	0.2	0.6	0.29	0.5	-0.14	0.7	0.68	0.06	0.68	0.06	0.78	0.02	0.4	0.3	-0.053	0.9	0.47	0.2	0.29	0.5	-0.24	0.6	-0.46	0.2	-0.53	0.2	-0.61	0.1	-0.00037	1	-0.078	0.9	-0.72	0.04	-0.14
LysoPC 18:3 (2n isomer)	0.19	0.6	0.89	0.003	0.63	0.1	0.51	0.2	0.54	0.2	0.56	0.1	0.32	0.4	0.2	0.6	0.21	0.6	-0.19	0.6	0.67	0.07	0.73	0.04	0.74	0.04	0.37	0.4	-0.04	0.9	0.45	0.3	0.23	0.6	-0.26	0.5	-0.54	0.2	-0.56	0.1	-0.53	0.2	0.1	0.8	-0.043	0.9	-0.7	0.05	-0.084
LysoPC 20:1	0.35	0.4	0.86	0.007	0.68	0.06	0.59	0.1	0.64	0.09	0.57	0.1	0.46	0.3	0.15	0.7	0.35	0.4	-0.051	0.9	0.54	0.2	0.65	0.08	0.75	0.03	0.46	0.3	-0.11	0.8	0.43	0.3	0.25	0.6	-0.22	0.6	-0.47	0.2	-0.52	0.2	-0.59	0.1	-0.0045	1	-0.036	0.9	-0.69	0.06	-0.096
LysoPC 20:4	0.21	0.6	0.91	0.002	0.66	0.08	0.54	0.2	0.56	0.1	0.55	0.2	0.39	0.3	0.17	0.7	0.27	0.5	-0.15	0.7	0.66	0.08	0.67	0.07	0.76	0.03	0.38	0.4	-0.05	0.9	0.48	0.2	0.28	0.5	-0.27	0.5	-0.48	0.2	-0.52	0.2	-0.6	0.1	0.0024	1	-0.08	0.9	-0.71	0.05	-0.12
LysoPE 14:0 (2n isomer)	0.39	0.3	0.86	0.006	0.76	0.03	0.69	0.06	0.69	0.06	0.52	0.2	0.54	0.2	0.18	0.7	0.48	0.2	0.042	0.9	0.5	0.2	0.52	0.2	0.68	0.06	0.43	0.3	-0.25	0.5	0.34	0.4	0.18	0.7	-0.3	0.5	-0.42	0.3	-0.56	0.1	-0.66	0.07	-0.14	0.7	-0.2	0.6	-0.7	0.05	-0.075
LysoPE 16:0	0.37	0.4	0.89	0.003	0.71	0.05	0.65	0.08	0.61	0.1	0.59	0.1	0.5	0.2	0.13	0.8	0.37	0.4	-0.097	0.8	0.59	0.1	0.59	0.1	0.72	0.05	0.41	0.3	-0.086	0.8	0.44	0.3	0.22	0.6	-0.3	0.5	-0.48	0.2	-0.53	0.2	-0.61	0.1	-0.062	0.9	-0.14	0.7	-0.75	0.03	-0.052
LysoPE 16:0 (2n isomer)	0.39	0.3	0.88	0.004	0.68	0.06	0.65	0.08	0.63	0.09	0.53	0.2	0.5	0.2	0.17	0.7	0.44	0.3	0.00098	1	0.57	0.1	0.57	0.1	0.75	0.03	0.47	0.2	-0.14	0.7	0.42	0.3	0.26	0.5	-0.25	0.6	-0.42	0.3	-0.52	0.2	-0.66	0.07	-0.12	0.8	-0.15	0.7	-0.73	0.04	-0.11
LysoPE 18:0	0.35	0.4	0.91	0.002	0.7	0.06	0.65	0.08	0.65	0.08	0.58	0.1	0.49	0.2	0.17	0.7	0.37	0.4	-0.061	0.9	0.58	0.1	0.62	0.1	0.74	0.04	0.44	0.3	-0.12	0.8	0.42	0.3	0.22	0.6	-0.3	0.5	-0.5	0.2	-0.57	0.1	-0.61	0.1	-0.032	0.9	-0.13	0.8	-0.72	0.04	-0.05
LysoPE 18:1	0.18	0.7	0.9	0.002	0.67	0.07	0.51	0.2	0.56	0.1	0.65	0.08	0.41	0.3	0.06	0.9	0.12	0.8	-0.28	0.5	0.61	0.1	0.7	0.05	0.71	0.05	0.29	0.5	0.058	0.9	0.54	0.2	0.25	0.5	-0.33	0.4	-0.56	0.1	-0.49	0.2	-0.47	0.2	0.13	0.8	0.0038	1	-0.66	0.08	-0.017
LysoPE 18:1 (2n isomer)	0.17	0.7	0.9	0.003	0.67	0.07	0.51	0.2	0.57	0.1	0.64	0.08	0.39	0.3	0.081	0.8	0.11	0.8	-0.27	0.5	0.6	0.1	0.72	0.05	0.7	0.05	0.3	0.5	0.032	0.9	0.52	0.2	0.24	0.6	-0.33	0.4	-0.57	0.1	-0.51	0.2	-0.47	0.2	0.14	0.7	0.0042	1	-0.65	0.08	-0.017
LysoPE 18:2 (2n isomer)	0.29	0.5	0.88	0.004	0.71	0.05	0.6	0.1	0.64	0.09	0.52	0.2	0.48	0.2	0.16	0.7	0.4	0.3	-0.018	1	0.57	0.1	0.58	0.1	0.75	0.03	0.43	0.3	-0.15	0.7	0.44	0.3	0.29	0.5	-0.26	0.5	-0.4	0.3	-0.51	0.2	-0.67	0.07	-0.1	0.8	-0.11	0.8	-0.69	0.06	-0.14
MAG (18:4) isomer3	-0.32	0.4	-0.89	0.003	-0.66	0.07	-0.64	0.09	-0.57	0.1	-0.41	0.3	-0.39	0.3	-0.32	0.4	-0.51	0.2	-0.034	0.9	-0.68	0.07	-0.56	0.1	-0.74	0.04	-0.46	0.2	0.24	0.6	-0.32	0.4	-0.22	0.6	0.25	0.6	0.39	0.3	0.61	0.1	0.73	0.04	0.17	0.7	0.27	0.5	0.78	0.02	0.17
Malvidin 3,5-diglucoside (Malvin)	0.039	0.9	0.1	0.8	-0.078	0.9	0.0012	1	0.042	0.9	-0.55	0.2	-0.16	0.7	0.59	0.1	0.86	0.006	0.77	0.03	0.34	0.4	-0.04	0.9	0.55	0.2	0.61	0.1	-0.53	0.2	-0.11	0.8	0.47	0.2	0.47	0.2	0.55	0.2	-0.079	0.9	-0.84	0.01	-0.68	0.06	-0.24	0.6	-0.25	0.6	-0.77
Melibiose	0.0012	1	-0.64	0.09	-0.37	0.4	-0.26	0.5	-0.22	0.6	0.04	0.9	-0.15	0.7	-0.33	0.4	-0.66	0.07	-0.24	0.6	-0.71	0.05	-0.25	0.5	-0.81	0.02	-0.46	0.2	0.18	0.7	-0.41	0.3	-0.61	0.1	-0.075	0.9	-0.19	0.7	0.19	0.6	0.97	8e-05	0.58	0.1	0.24	0.6	0.63	0.1	0.64
Narcissoside	0.061	0.9	0.35	0.4	0.14	0.7	0.18	0.7	0.07	0.9	-0.35	0.4	0.056	0.9	0.41	0.3	0.85	0.007	0.53	0.2	0.52	0.2	-0.05	0.9	0.63	0.09	0.51	0.2	-0.34	0.4	0.16	0.7	0.55	0.2	0.24	0.6	0.47	0.2	-0.063	0.9	-0.96	0.0001	-0.79	0.02	-0.35	0.4	-0.47	0.2	-0.72
Naringenin 7-O-neohesperidoside (Naringin)	0.096	0.8	0.86	0.006	0.58	0.1	0.44	0.3	0.37	0.4	0.35	0.4	0.27	0.5	0.22	0.6	0.39	0.3	-0.12	0.8	0.79	0.02	0.54	0.2	0.79	0.02	0.36	0.4	-0.025	1	0.51	0.2	0.42	0.3	-0.19	0.7	-0.26	0.5	-0.41	0.3	-0.76	0.03	-0.22	0.6	-0.18	0.7	-0.77	0.03	-0.31
Narirutin	0.12	0.8	0.86	0.007	0.53	0.2	0.42	0.3	0.42	0.3	0.35	0.4	0.24	0.6	0.28	0.5	0.39	0.3	-0.051	0.9	0.77	0.03	0.62	0.1	0.84	0.01	0.44	0.3	-0.069	0.9	0.48	0.2	0.42	0.3	-0.13	0.8	-0.29	0.5	-0.45	0.3	-0.74	0.04	-0.15	0.7	-0.12	0.8	-0.73	0.04	-0.32
N-Feruloyl spermidine	-0.13	0.8	-0.89	0.003	-0.62	0.1	-0.52	0.2	-0.45	0.3	-0.36	0.4	-0.4	0.3	-0.18	0.7	-0.47	0.2	0.031	0.9	-0.72	0.04	-0.43	0.3	-0.78	0.02	-0.37	0.4	0.075	0.9	-0.52	0.2	-0.44	0.3	0.25	0.6	0.21	0.6	0.39	0.3	0.82	0.01	0.32	0.4	0.26	0.5	0.74	0.04	0.29
N-hexosyl-p-coumaroyl putrescine	-0.058	0.9	-0.26	0.5	-0.099	0.8	-0.12	0.8	0.0012	1	0.42	0.3	0.015	1	-0.43	0.3	-0.86	0.006	-0.54	0.2	-0.5	0.2	0.085	0.8	-0.59	0.1	-0.49	0.2	0.36	0.4	-0.1	0.8	-0.53	0.2	-0.31	0.5	-0.52	0.2	0.031	0.9	0.94	0.0005	0.8	0.02	0.34	0.4	0.45	0.3	0.75
N-hydroxy tryptamine	0.21	0.6	0.9	0.002	0.65	0.08	0.54	0.2	0.51	0.2	0.61	0.1	0.34	0.4	0.15	0.7	0.15	0.7	-0.29	0.5	0.68	0.07	0.71	0.05	0.67	0.07	0.29	0.5	0.018	1	0.46	0.3	0.17	0.7	-0.33	0.4	-0.59	0.1	-0.57	0.1	-0.47	0.2	0.13	0.8	-0.078	0.9	-0.73	0.04	-0.0009
Nicotinic acid-hexoside	-0.064	0.9	-0.35	0.4	-0.13	0.8	-0.13	0.8	-0.044	0.9	0.35	0.4	0.027	0.9	-0.46	0.3	-0.83	0.01	-0.5	0.2	-0.59	0.1	-0.059	0.9	-0.69	0.06	-0.55	0.2	0.33	0.4	-0.17	0.7	-0.56	0.1	-0.32	0.4	-0.44	0.3	0.093	0.8	0.96	0.0001	0.72	0.04	0.28	0.5	0.52	0.2	0.76
N-Lauryldiethanolamine	0.11	0.8	0.18	0.7	0.13	0.8	0.15	0.7	-0.077	0.9	-0.4	0.3	0.087	0.8	0.25	0.6	0.84	0.01	0.46	0.3	0.41	0.3	-0.28	0.5	0.44	0.3	0.35	0.4	-0.26	0.5	0.14	0.7	0.48	0.2	0.24	0.6	0.59	0.1	0.1	0.8	-0.88	0.004	-0.89	0.003	-0.39	0.3	-0.44	0.3	-0.66
N'-p-Coumaroyl agmatine	0.12	0.8	0.8	0.02	0.56	0.2	0.45	0.3	0.29	0.5	0.18	0.7	0.2	0.6	0.33	0.4	0.55	0.2	-0.013	1	0.83	0.01	0.42	0.3	0.74	0.04	0.37	0.4	-0.15	0.7	0.39	0.3	0.37	0.4	-0.14	0.7	-0.14	0.7	-0.43	0.3	-0.86	0.007	-0.37	0.4	-0.32	0.4	-0.82	0.01	-0.4
N-p-Coumaroyl agmatine	0.078	0.9	0.81	0.02	0.56	0.1	0.44	0.3	0.34	0.4	0.18	0.7	0.2	0.6	0.37	0.4	0.54	0.2	0.028	0.9	0.8	0.02	0.46	0.3	0.75	0.03	0.38	0.3	-0.21	0.6	0.36	0.4	0.37	0.4	-0.14	0.7	-0.16	0.7	-0.47	0.2	-0.85	0.008	-0.33	0.4	-0.3	0.5	-0.78	0.02	-0.4
O-Feruloyl 4-hydroxylcoumarin	0.12	0.8	0.087	0.8	-0.13	0.8	0.056	0.9	-0.1	0.8	-0.58	0.1	-0.14	0.7	0.54	0.2	0.9	0.002	0.68	0.06	0.41	0.3	-0.18	0.7	0.47	0.2	0.55	0.2	-0.41	0.3	-0.094	0.8	0.43	0.3	0.41	0.3	0.6	0.1	-0.016	1	-0.84	0.01	-0.79	0.02	-0.38	0.4	-0.34	0.4	-0.72
O-methylnaringenin C-pentoside	-0.099	0.8	-0.76	0.03	-0.45	0.3	-0.39	0.3	-0.32	0.4	-0.13	0.8	-0.23	0.6	-0.32	0.4	-0.61	0.1	-0.15	0.7	-0.76	0.03	-0.38	0.4	-0.84	0.009	-0.49	0.2	0.15	0.7	-0.44	0.3	-0.54	0.2	0.031	0.9	0.0062	1	0.32	0.4	0.92	0.001	0.45	0.3	0.25	0.6	0.71	0.05	0.5
Oxoadipic acid	0.23	0.6	0.56	0.1	0.36	0.4	0.36	0.4	0.2	0.6	-0.055	0.9	0.18	0.7	0.35	0.4	0.79	0.02	0.3	0.5	0.66	0.07	0.19	0.6	0.74	0.04	0.53	0.2	-0.24	0.6	0.29	0.5	0.48	0.2	0.12	0.8	0.18	0.7	-0.22	0.6	-0.95	0.0003	-0.62	0.1	-0.3	0.5	-0.71	0.05	-0.58
Panose	-0.12	0.8	-0.49	0.2	-0.26	0.5	-0.33	0.4	-0.044	0.9	0.26	0.5	-0.081	0.8	-0.45	0.3	-0.85	0.008	-0.34	0.4	-0.71	0.05	0.0025	1	-0.6	0.1	-0.43	0.3	0.3	0.5	-0.16	0.7	-0.43	0.3	-0.075	0.9	-0.31	0.5	0.22	0.6	0.98	2e-05	0.77	0.03	0.53	0.2	0.68	0.06	0.6
Parthenolide	-0.093	0.8	0.86	0.006	0.51	0.2	0.35	0.4	0.3	0.5	0.32	0.4	0.25	0.5	0.16	0.7	0.29	0.5	-0.17	0.7	0.8	0.02	0.48	0.2	0.79	0.02	0.27	0.5	0.072	0.9	0.61	0.1	0.52	0.2	-0.23	0.6	-0.19	0.7	-0.31	0.5	-0.75	0.03	-0.25	0.6	-0.18	0.7	-0.67	0.07	-0.34
p-Coumaric acid	0.17	0.7	0.63	0.09	0.34	0.4	0.35	0.4	0.26	0.5	-0.053	0.9	0.13	0.8	0.46	0.3	0.77	0.03	0.34	0.4	0.71	0.05	0.31	0.5	0.81	0.01	0.59	0.1	-0.29	0.5	0.27	0.5	0.5	0.2	0.12	0.8	0.12	0.8	-0.32	0.4	-0.96	0.0002	-0.54	0.2	-0.29	0.5	-0.68	0.06	-0.59
p-Coumaroyl quinic acid O-glucuronic acid	-0.16	0.7	-0.62	0.1	-0.37	0.4	-0.45	0.3	-0.32	0.4	0.047	0.9	-0.34	0.4	-0.34	0.4	-0.81	0.02	-0.4	0.3	-0.56	0.2	-0.049	0.9	-0.68	0.06	-0.48	0.2	0.31	0.5	-0.27	0.5	-0.48	0.2	0.056	0.9	-0.2	0.6	0.24	0.6	0.96	0.0001	0.7	0.05	0.45	0.3	0.57	0.1	0.48
p-Coumaryl alcohol	0.19	0.7	0.58	0.1	0.22	0.6	0.32	0.4	0.24	0.6	-0.15	0.7	0.015	1	0.62	0.1	0.81	0.01	0.45	0.3	0.72	0.04	0.34	0.4	0.79	0.02	0.67	0.07	-0.4	0.3	0.11	0.8	0.43	0.3	0.18	0.7	0.11	0.8	-0.41	0.3	-0.93	0.0009	-0.5	0.2	-0.33	0.4	-0.65	0.08	-0.6
Peonidin	0.092	0.8	0.7	0.05	0.51	0.2	0.31	0.4	0.44	0.3	0.18	0.7	0.19	0.6	0.32	0.4	0.53	0.2	0.19	0.7	0.62	0.1	0.53	0.2	0.85	0.007	0.52	0.2	-0.25	0.6	0.39	0.3	0.5	0.2	0.066	0.9	-0.078	0.9	-0.36	0.4	-0.83	0.01	-0.27	0.5	-0.03	0.9	-0.61	0.1	-0.52
Peonidin 3-feruloylsophoroside-5-glucoside.	0.21	0.6	0.65	0.08	0.33	0.4	0.35	0.4	0.2	0.6	-0.0088	1	0.083	0.8	0.46	0.3	0.72	0.05	0.24	0.6	0.79	0.02	0.38	0.4	0.82	0.01	0.59	0.1	-0.21	0.6	0.29	0.5	0.46	0.2	0.12	0.8	0.045	0.9	-0.35	0.4	-0.91	0.002	-0.47	0.2	-0.27	0.5	-0.77	0.03	-0.55
Phytocassane C	0.00096	1	-0.71	0.05	-0.49	0.2	-0.31	0.5	-0.36	0.4	-0.11	0.8	-0.23	0.6	-0.27	0.5	-0.57	0.1	-0.17	0.7	-0.66	0.07	-0.37	0.4	-0.82	0.01	-0.44	0.3	0.2	0.6	-0.45	0.3	-0.57	0.1	-0.00089	1	-0.045	0.9	0.27	0.5	0.91	0.002	0.44	0.3	0.15	0.7	0.61	0.1	0.56
Plantamajoside	0.11	0.8	0.19	0.6	0.075	0.9	0.13	0.8	0.0028	1	-0.46	0.3	-0.014	1	0.44	0.3	0.9	0.003	0.6	0.1	0.43	0.3	-0.14	0.7	0.52	0.2	0.5	0.2	-0.41	0.3	0.022	1	0.47	0.2	0.33	0.4	0.54	0.2	-0.035	0.9	-0.91	0.002	-0.81	0.02	-0.36	0.4	-0.42	0.3	-0.72
Procyanidin A2	0.2	0.6	0.89	0.003	0.62	0.1	0.52	0.2	0.5	0.2	0.47	0.2	0.35	0.4	0.2	0.6	0.35	0.4	-0.11	0.8	0.71	0.05	0.62	0.1	0.79	0.02	0.4	0.3	-0.049	0.9	0.49	0.2	0.34	0.4	-0.22	0.6	-0.39	0.3	-0.48	0.2	-0.68	0.06	-0.093	0.8	-0.12	0.8	-0.74	0.03	-0.2
Proline	-0.1	0.8	-0.55	0.2	-0.3	0.5	-0.27	0.5	-0.2	0.6	0.14	0.7	-0.1	0.8	-0.43	0.3	-0.78	0.02	-0.38	0.4	-0.67	0.07	-0.21	0.6	-0.77	0.02	-0.55	0.2	0.3	0.5	-0.27	0.5	-0.55	0.2	-0.17	0.7	-0.24	0.6	0.22	0.6	0.98	2e-05	0.62	0.1	0.29	0.5	0.62	0.1	0.66
Prunetin	0.12	0.8	0.76	0.03	0.43	0.3	0.4	0.3	0.34	0.4	0.11	0.8	0.22	0.6	0.37	0.4	0.64	0.09	0.19	0.6	0.75	0.03	0.39	0.3	0.84	0.009	0.52	0.2	-0.2	0.6	0.39	0.3	0.51	0.2	-0.015	1	-0.013	1	-0.35	0.4	-0.92	0.001	-0.45	0.3	-0.26	0.5	-0.71	0.05	-0.5
Putrescine	-0.084	0.8	-0.65	0.08	-0.34	0.4	-0.27	0.5	-0.26	0.5	-0.0025	1	-0.12	0.8	-0.39	0.3	-0.66	0.07	-0.26	0.5	-0.72	0.04	-0.38	0.4	-0.87	0.005	-0.56	0.1	0.2	0.6	-0.38	0.4	-0.58	0.1	-0.13	0.8	-0.1	0.8	0.26	0.5	0.93	0.0007	0.47	0.2	0.17	0.7	0.65	0.08	0.62
Pyridoxine O-glucoside	0.098	0.8	0.9	0.003	0.59	0.1	0.47	0.2	0.44	0.3	0.42	0.3	0.29	0.5	0.23	0.6	0.32	0.4	-0.14	0.7	0.77	0.03	0.61	0.1	0.78	0.02	0.36	0.4	-0.039	0.9	0.5	0.2	0.36	0.4	-0.23	0.6	-0.36	0.4	-0.48	0.2	-0.69	0.06	-0.11	0.8	-0.15	0.7	-0.74	0.04	-0.24
Pyrrole-2-carboxylic acid	-0.049	0.9	-0.53	0.2	-0.19	0.7	-0.18	0.7	-0.11	0.8	0.11	0.8	-0.14	0.7	-0.25	0.5	-0.68	0.06	-0.3	0.5	-0.65	0.08	-0.15	0.7	-0.81	0.01	-0.52	0.2	0.062	0.9	-0.45	0.3	-0.7	0.05	-0.19	0.7	-0.33	0.4	0.013	1	0.94	0.0005	0.65	0.08	0.19	0.7	0.55	0.2	0.67
Quercetin O-acetylhexoside	0.29	0.5	-0.41	0.3	-0.3	0.5	0.055	0.9	-0.12	0.8	-0.69	0.06	-0.33	0.4	0.67	0.07	0.66	0.07	0.75	0.03	-0.14	0.7	-0.35	0.4	-0.27	0.5	0.3	0.5	-0.75	0.03	-0.84	0.009	-0.37	0.4	0.33	0.4	0.34	0.4	-0.26	0.5	-0.15	0.7	-0.35	0.4	-0.46	0.3	0.035	0.9	-0.17
Riboflavin	0.11	0.8	0.68	0.06	0.42	0.3	0.35	0.4	0.26	0.5	0.034	0.9	0.19	0.6	0.33	0.4	0.68	0.07	0.21	0.6	0.73	0.04	0.3	0.5	0.81	0.01	0.49	0.2	-0.19	0.7	0.4	0.3	0.54	0.2	0.04	0.9	0.095	0.8	-0.26	0.5	-0.95	0.0003	-0.53	0.2	-0.26	0.5	-0.7	0.05	-0.57
Salicin	0.16	0.7	0.9	0.002	0.6	0.1	0.51	0.2	0.49	0.2	0.42	0.3	0.32	0.4	0.26	0.5	0.39	0.3	-0.07	0.9	0.74	0.04	0.61	0.1	0.8	0.02	0.41	0.3	-0.095	0.8	0.46	0.3	0.35	0.4	-0.22	0.6	-0.36	0.4	-0.51	0.2	-0.72	0.05	-0.13	0.8	-0.17	0.7	-0.75	0.03	-0.23
Schizandrin	-0.1	0.8	-0.31	0.5	-0.12	0.8	-0.18	0.7	-0.038	0.9	0.38	0.3	-0.018	1	-0.45	0.3	-0.88	0.004	-0.54	0.2	-0.52	0.2	0.06	0.9	-0.6	0.1	-0.52	0.2	0.37	0.4	-0.099	0.8	-0.51	0.2	-0.28	0.5	-0.48	0.2	0.081	0.8	0.95	0.0003	0.79	0.02	0.37	0.4	0.49	0.2	0.72
Selgin O-malonylhexoside	0.2	0.6	0.43	0.3	0.16	0.7	0.29	0.5	0.16	0.7	-0.28	0.5	0.054	0.9	0.55	0.2	0.9	0.002	0.56	0.2	0.59	0.1	0.09	0.8	0.68	0.06	0.62	0.1	-0.42	0.3	0.066	0.9	0.44	0.3	0.22	0.6	0.31	0.4	-0.25	0.5	-0.95	0.0003	-0.69	0.06	-0.39	0.3	-0.56	0.1	-0.64
serotonin	0.18	0.7	0.86	0.007	0.63	0.09	0.48	0.2	0.48	0.2	0.55	0.2	0.27	0.5	0.18	0.7	0.17	0.7	-0.26	0.5	0.68	0.06	0.73	0.04	0.7	0.05	0.32	0.4	-0.0089	1	0.44	0.3	0.2	0.6	-0.25	0.6	-0.55	0.2	-0.55	0.2	-0.49	0.2	0.12	0.8	-0.027	0.9	-0.72	0.04	-0.081
Sinapinaldehyde	-0.029	0.9	0.62	0.1	0.2	0.6	0.18	0.7	0.17	0.7	-0.081	0.8	0.044	0.9	0.41	0.3	0.63	0.1	0.28	0.5	0.75	0.03	0.34	0.4	0.88	0.004	0.56	0.1	-0.13	0.8	0.4	0.3	0.66	0.07	0.17	0.7	0.19	0.7	-0.19	0.7	-0.93	0.0008	-0.5	0.2	-0.18	0.7	-0.58	0.1	-0.67
Sinapoyl malate	0.065	0.9	0.89	0.003	0.6	0.1	0.43	0.3	0.47	0.2	0.64	0.09	0.32	0.4	0.055	0.9	-0.0051	1	-0.38	0.4	0.65	0.08	0.72	0.04	0.67	0.07	0.21	0.6	0.15	0.7	0.55	0.2	0.25	0.6	-0.35	0.4	-0.58	0.1	-0.47	0.2	-0.4	0.3	0.19	0.6	0.012	1	-0.63	0.1	0.0075
Sissotrin	0.13	0.8	0.72	0.04	0.42	0.3	0.38	0.4	0.28	0.5	0.061	0.9	0.18	0.7	0.38	0.3	0.67	0.07	0.19	0.7	0.77	0.03	0.37	0.4	0.82	0.01	0.51	0.2	-0.2	0.6	0.37	0.4	0.5	0.2	0.02	1	0.024	1	-0.34	0.4	-0.93	0.0007	-0.48	0.2	-0.28	0.5	-0.73	0.04	-0.53
Skimmine	-0.15	0.7	-0.71	0.05	-0.42	0.3	-0.38	0.4	-0.26	0.5	-0.076	0.9	-0.21	0.6	-0.31	0.4	-0.66	0.07	-0.17	0.7	-0.75	0.03	-0.32	0.4	-0.82	0.01	-0.5	0.2	0.14	0.7	-0.42	0.3	-0.53	0.2	-0.02	1	-0.058	0.9	0.27	0.5	0.93	0.0007	0.52	0.2	0.27	0.5	0.73	0.04	0.53
Thymine	0.19	0.6	0.6	0.1	0.29	0.5	0.34	0.4	0.17	0.7	-0.092	0.8	0.085	0.8	0.47	0.2	0.78	0.02	0.31	0.5	0.76	0.03	0.27	0.5	0.78	0.02	0.58	0.1	-0.25	0.5	0.25	0.5	0.48	0.2	0.14	0.7	0.14	0.7	-0.3	0.5	-0.95	0.0003	-0.57	0.1	-0.33	0.4	-0.73	0.04	-0.6
Tiliroside	0.18	0.7	0.7	0.05	0.45	0.3	0.4	0.3	0.29	0.5	0.062	0.9	0.2	0.6	0.36	0.4	0.7	0.06	0.2	0.6	0.74	0.04	0.34	0.4	0.79	0.02	0.5	0.2	-0.22	0.6	0.35	0.4	0.47	0.2	0.022	1	0.031	0.9	-0.34	0.4	-0.93	0.0007	-0.5	0.2	-0.29	0.5	-0.75	0.03	-0.52
Tricin	0.1	0.8	0.87	0.005	0.5	0.2	0.43	0.3	0.42	0.3	0.31	0.5	0.27	0.5	0.3	0.5	0.44	0.3	0.013	1	0.77	0.03	0.56	0.1	0.86	0.007	0.47	0.2	-0.084	0.8	0.48	0.2	0.46	0.3	-0.14	0.7	-0.23	0.6	-0.43	0.3	-0.79	0.02	-0.22	0.6	-0.17	0.7	-0.71	0.05	-0.35
Tricin 4'-O-(β-guaiacylglyceryl) ether 5-O-hexosyl-O-hexoside	0.1	0.8	0.85	0.008	0.51	0.2	0.39	0.3	0.4	0.3	0.37	0.4	0.22	0.6	0.25	0.6	0.34	0.4	-0.087	0.8	0.77	0.03	0.64	0.08	0.85	0.008	0.44	0.3	-0.016	1	0.51	0.2	0.43	0.3	-0.11	0.8	-0.3	0.5	-0.42	0.3	-0.7	0.05	-0.11	0.8	-0.067	0.9	-0.72	0.04	-0.32
Tricin 4'-O-syringic acid	0.076	0.9	0.88	0.004	0.55	0.2	0.41	0.3	0.4	0.3	0.44	0.3	0.26	0.5	0.19	0.7	0.26	0.5	-0.18	0.7	0.77	0.03	0.64	0.09	0.8	0.02	0.36	0.4	0.044	0.9	0.55	0.2	0.4	0.3	-0.2	0.6	-0.36	0.4	-0.43	0.3	-0.65	0.08	-0.068	0.9	-0.08	0.9	-0.72	0.05	-0.24
Tricin 4'-O-syringyl alcohol	0.12	0.8	0.88	0.004	0.55	0.2	0.45	0.3	0.42	0.3	0.4	0.3	0.26	0.5	0.25	0.5	0.33	0.4	-0.12	0.8	0.78	0.02	0.63	0.09	0.81	0.01	0.4	0.3	-0.024	1	0.49	0.2	0.38	0.4	-0.18	0.7	-0.35	0.4	-0.47	0.2	-0.69	0.06	-0.1	0.8	-0.13	0.8	-0.74	0.03	-0.26
Tricin 4'-O-β-guaiacylglycerol	0.13	0.8	0.72	0.05	0.36	0.4	0.34	0.4	0.28	0.5	0.047	0.9	0.12	0.8	0.44	0.3	0.65	0.08	0.22	0.6	0.79	0.02	0.44	0.3	0.86	0.006	0.57	0.1	-0.21	0.6	0.34	0.4	0.51	0.2	0.07	0.9	0.00064	1	-0.37	0.4	-0.91	0.002	-0.42	0.3	-0.24	0.6	-0.71	0.05	-0.54
Tricin 5-O-feruloylhexoside	0.063	0.9	0.86	0.006	0.48	0.2	0.36	0.4	0.44	0.3	0.42	0.3	0.22	0.6	0.24	0.6	0.26	0.5	-0.097	0.8	0.73	0.04	0.7	0.05	0.86	0.006	0.44	0.3	0.0096	1	0.52	0.2	0.44	0.3	-0.13	0.8	-0.35	0.4	-0.43	0.3	-0.64	0.09	-0.016	1	-0.0031	1	-0.65	0.08	-0.28
Tricin 5-O-rutinoside	0.095	0.8	0.88	0.004	0.58	0.1	0.43	0.3	0.43	0.3	0.53	0.2	0.28	0.5	0.14	0.7	0.15	0.7	-0.27	0.5	0.73	0.04	0.7	0.06	0.75	0.03	0.3	0.5	0.08	0.8	0.54	0.2	0.32	0.4	-0.25	0.5	-0.47	0.2	-0.46	0.2	-0.54	0.2	0.058	0.9	-0.032	0.9	-0.7	0.05	-0.13
Tricin 7-O-hexoside	0.066	0.9	0.79	0.02	0.63	0.09	0.44	0.3	0.37	0.4	0.23	0.6	0.26	0.5	0.26	0.5	0.5	0.2	-0.013	1	0.74	0.04	0.42	0.3	0.73	0.04	0.32	0.4	-0.18	0.7	0.43	0.3	0.39	0.3	-0.16	0.7	-0.15	0.7	-0.41	0.3	-0.84	0.008	-0.35	0.4	-0.25	0.5	-0.75	0.03	-0.4
Tricin O-eudesmic acid	0.11	0.8	0.9	0.002	0.56	0.2	0.48	0.2	0.46	0.3	0.38	0.3	0.31	0.4	0.26	0.5	0.39	0.3	-0.053	0.9	0.76	0.03	0.58	0.1	0.82	0.01	0.42	0.3	-0.068	0.9	0.49	0.2	0.41	0.3	-0.21	0.6	-0.31	0.5	-0.47	0.2	-0.75	0.03	-0.18	0.7	-0.18	0.7	-0.72	0.04	-0.27
Tricin O-glucuronic acid	0.082	0.8	-0.029	0.9	-0.12	0.8	-0.001	1	-0.17	0.7	-0.61	0.1	-0.11	0.8	0.41	0.3	0.86	0.006	0.66	0.08	0.29	0.5	-0.32	0.4	0.36	0.4	0.43	0.3	-0.38	0.4	-0.086	0.8	0.42	0.3	0.42	0.3	0.69	0.06	0.12	0.8	-0.79	0.02	-0.85	0.007	-0.36	0.4	-0.26	0.5	-0.72
Tricin O-malonyl rhamnoside	0.22	0.6	0.73	0.04	0.41	0.3	0.43	0.3	0.28	0.5	0.08	0.9	0.19	0.7	0.4	0.3	0.69	0.06	0.19	0.7	0.79	0.02	0.37	0.4	0.81	0.02	0.54	0.2	-0.19	0.6	0.34	0.4	0.45	0.3	0.005	1	-0.017	1	-0.38	0.4	-0.92	0.001	-0.47	0.2	-0.32	0.4	-0.78	0.02	-0.48
Tricin O-oxalic acid O-coumaroyl shikimic acid	0.099	0.8	0.71	0.05	0.42	0.3	0.37	0.4	0.3	0.5	0.032	0.9	0.19	0.7	0.4	0.3	0.69	0.06	0.24	0.6	0.74	0.04	0.33	0.4	0.81	0.01	0.51	0.2	-0.24	0.6	0.35	0.4	0.51	0.2	0.015	1	0.057	0.9	-0.33	0.4	-0.95	0.0003	-0.51	0.2	-0.29	0.5	-0.69	0.06	-0.55
Tricin O-phenylformic acid	0.16	0.7	0.75	0.03	0.43	0.3	0.4	0.3	0.31	0.5	0.095	0.8	0.15	0.7	0.43	0.3	0.64	0.08	0.17	0.7	0.8	0.02	0.44	0.3	0.83	0.01	0.53	0.2	-0.22	0.6	0.33	0.4	0.44	0.3	0.0085	1	-0.062	0.9	-0.42	0.3	-0.9	0.002	-0.4	0.3	-0.27	0.5	-0.76	0.03	-0.49
Tricin O-saccharic acid	0.17	0.7	0.87	0.005	0.62	0.1	0.52	0.2	0.49	0.2	0.36	0.4	0.38	0.3	0.22	0.6	0.48	0.2	0.0097	1	0.7	0.05	0.49	0.2	0.8	0.02	0.42	0.3	-0.13	0.8	0.48	0.2	0.41	0.3	-0.2	0.6	-0.24	0.6	-0.43	0.3	-0.8	0.02	-0.28	0.5	-0.21	0.6	-0.73	0.04	-0.3
Tricin O-sinapic acid	0.099	0.8	0.83	0.01	0.54	0.2	0.41	0.3	0.39	0.3	0.29	0.5	0.24	0.6	0.28	0.5	0.45	0.3	-0.0083	1	0.77	0.03	0.55	0.2	0.83	0.01	0.43	0.3	-0.098	0.8	0.47	0.2	0.45	0.3	-0.1	0.8	-0.2	0.6	-0.41	0.3	-0.8	0.02	-0.25	0.6	-0.15	0.7	-0.74	0.04	-0.39
Tricin O-vanilloylhexoside	-0.07	0.9	-0.88	0.004	-0.57	0.1	-0.4	0.3	-0.44	0.3	-0.51	0.2	-0.32	0.4	-0.094	0.8	-0.18	0.7	0.23	0.6	-0.7	0.05	-0.66	0.08	-0.8	0.02	-0.33	0.4	-0.098	0.8	-0.6	0.1	-0.42	0.3	0.22	0.6	0.39	0.3	0.38	0.4	0.6	0.1	0.015	1	-0.0017	1	0.67	0.07	0.2
Verbascoside	0.082	0.8	0.14	0.7	0.011	1	0.09	0.8	-0.056	0.9	-0.52	0.2	-0.056	0.9	0.45	0.3	0.89	0.003	0.62	0.1	0.41	0.3	-0.2	0.6	0.48	0.2	0.48	0.2	-0.41	0.3	-0.018	1	0.46	0.3	0.35	0.4	0.59	0.1	-0.0008	1	-0.89	0.003	-0.83	0.01	-0.38	0.4	-0.38	0.4	-0.73
Vitexin 2''-O-beta-L-rhamnoside	0.11	0.8	0.21	0.6	0.094	0.8	0.18	0.7	-0.012	1	-0.47	0.2	0.016	1	0.45	0.3	0.91	0.002	0.58	0.1	0.44	0.3	-0.21	0.6	0.46	0.3	0.44	0.3	-0.43	0.3	-0.011	1	0.41	0.3	0.25	0.6	0.54	0.2	-0.057	0.9	-0.91	0.002	-0.85	0.007	-0.46	0.3	-0.43	0.3	-0.67
[truncated: 15 more columns]
