# Supplementary material for: Flexible response and rapid recovery strategies of the plateau forage Poa crymophila to cold and drought
Source: Frontiers journal article supplement (doi:10.3389/fpls.2022.970496), 2022-11-08
Supplement: Table_5.xlsx [file Table_5.xlsx]

## Sheet: Cold
Table S5-1. Genes in cold co-expression network
GeneID	CME	MM.turquoise	p.MM.turquoise	MM.blue	p.MM.blue	MM.royalblue	p.MM.royalblue	MM.yellow	p.MM.yellow	MM.darkred	p.MM.darkred	MM.greenyellow	p.MM.greenyellow	MM.purple	p.MM.purple	MM.grey60	p.MM.grey60	MM.darkgrey	p.MM.darkgrey	MM.green	p.MM.green	MM.black	p.MM.black	MM.magenta	p.MM.magenta	MM.lightcyan	p.MM.lightcyan	MM.cyan	p.MM.cyan	MM.midnightblue	p.MM.midnightblue	MM.darkgreen	p.MM.darkgreen	MM.brown	p.MM.brown	MM.darkturquoise	p.MM.darkturquoise	MM.lightyellow	p.MM.lightyellow	MM.red	p.MM.red	MM.grey	p.MM.grey	MM.lightgreen	p.MM.lightgreen	MM.pink	p.MM.pink	MM.salmon	p.MM.salmon
Unigene31417_DB	black	0.71589	0.0300798	-0.799954	0.00963527	0.685729	0.0414375	0.726926	0.0264987	-0.700341	0.0356406	-0.478433	0.192642	0.62249	0.0733941	0.831379	0.00547389	0.404977	0.279588	-0.405869	0.278427	0.467209	0.204789	-0.417208	0.263902	0.0827728	0.832336	0.515764	0.155237	0.583171	0.0993025	0.52385	0.147743	0.314351	0.410026	0.254135	0.509341	0.247011	0.521682	0.0435145	0.911493	0.0857469	0.826385	-0.153961	0.692483	0.108531	0.781061	0.242943	0.528781
CL10615.Contig2_DB	black	0.680664	0.04358	-0.783259	0.012534	0.780213	0.0131192	0.905787	0.000769956	-0.381583	0.310896	-0.201535	0.60308	0.655312	0.0553714	0.604116	0.0849018	0.416839	0.264368	-0.555893	0.120155	0.764639	0.016399	-0.296703	0.438166	0.217311	0.574351	0.432484	0.244983	0.572227	0.107381	0.58234	0.0999025	0.414111	0.267828	0.380884	0.311859	-0.0228249	0.953522	0.355581	0.347664	0.0727599	0.852427	-0.0666404	0.864743	0.200166	0.605596	-0.0717431	0.854472
CL7019.Contig3_DB	black	0.635014	0.0661399	-0.789166	0.0114494	0.709303	0.0323608	0.898963	0.0009767	-0.364161	0.335307	-0.220085	0.569352	0.64585	0.060241	0.682135	0.0429507	0.433723	0.243481	-0.614319	0.0783834	0.708026	0.0328155	-0.36279	0.337267	0.0792681	0.83936	0.479505	0.191505	0.541285	0.132315	0.544272	0.129772	0.457646	0.215465	0.28266	0.461144	-0.041235	0.916116	0.344745	0.363582	-0.073622	0.850694	0.0450272	0.908426	0.183156	0.637151	-0.031139	0.936615
Unigene27900_DB	black	0.811993	0.00785195	-0.544764	0.129356	0.794552	0.0105173	0.769268	0.0153727	-0.282401	0.461572	-0.096385	0.80516	0.557198	0.119103	0.419724	0.260734	0.514475	0.156452	-0.60804	0.0823563	0.812854	0.00773378	0.102478	0.793053	0.341723	0.368082	0.0873089	0.823262	0.332876	0.381408	0.691535	0.0390665	0.0691349	0.859719	0.607126	0.0829453	-0.223325	0.563534	0.16405	0.673206	0.00919979	0.98126	-0.223219	0.563723	-0.0806269	0.836635	-0.0397174	0.919195
Unigene45298_DB	black	0.890644	0.00127757	-0.506446	0.164142	0.553093	0.122432	0.724287	0.0273282	-0.410495	0.272452	-0.245249	0.524752	0.60433	0.0847615	0.44429	0.230876	0.509492	0.1612	-0.480512	0.190438	0.772165	0.0147529	0.157225	0.686228	0.397245	0.289746	0.240419	0.533204	0.469488	0.20229	0.470358	0.20134	-0.0319469	0.934974	0.648287	0.0589618	-0.01187	0.975821	0.0506075	0.897123	-0.0181294	0.963077	-0.34657	0.360877	-0.162904	0.675387	0.155966	0.688639
CL4698.Contig1_DB	black	0.689978	0.0396937	-0.602697	0.0858337	0.809381	0.00821798	0.828317	0.00581134	-0.219947	0.5696	-0.0911917	0.815508	0.506809	0.16379	0.397108	0.289929	0.497042	0.173421	-0.596456	0.0900083	0.824295	0.00627572	-0.0501981	0.897952	0.27024	0.481884	0.275251	0.47347	0.452843	0.22094	0.698639	0.0362868	0.23808	0.537316	0.570593	0.10862	-0.174936	0.652587	0.341937	0.367763	0.193637	0.617644	-0.178146	0.646546	0.0438896	0.910732	-0.19557	0.61407
Unigene32255_DB	black	0.613852	0.0786745	-0.73047	0.025411	0.586371	0.0970125	0.721708	0.0281549	-0.583304	0.0992069	-0.283065	0.460474	0.640249	0.0632467	0.81433	0.00753394	0.253725	0.510049	-0.389436	0.300196	0.595942	0.0903578	-0.386549	0.304109	0.0849157	0.828047	0.535362	0.137443	0.731686	0.0250447	0.579796	0.101753	0.345375	0.362647	0.299344	0.433901	0.226958	0.557035	0.218375	0.572432	0.112778	0.772671	-0.186799	0.630348	0.166551	0.668451	0.225925	0.55888
Unigene33228_DB	black	0.623439	0.0728279	-0.654041	0.0560104	0.808552	0.0083365	0.875243	0.00199472	-0.144911	0.709908	0.0536152	0.891037	0.651925	0.0570846	0.320035	0.401144	0.352935	0.351519	-0.51221	0.158601	0.859607	0.00296776	-0.0854314	0.827016	0.43948	0.236569	0.144316	0.711057	0.361957	0.33846	0.507029	0.163577	0.346705	0.360677	0.432738	0.244674	-0.220969	0.567763	0.446782	0.227957	-0.0155121	0.968405	-0.0357611	0.927226	0.258911	0.501133	-0.238743	0.53615
Unigene15247_DB	black	0.65535	0.0553521	-0.608906	0.0818012	0.779623	0.0132346	0.879861	0.00175624	-0.100921	0.796142	-0.0154705	0.96849	0.548065	0.126584	0.345127	0.363015	0.50922	0.161461	-0.658985	0.0535507	0.8527	0.00348625	-0.0448555	0.908774	0.273032	0.477189	0.220607	0.568413	0.342967	0.366226	0.588351	0.0956124	0.298402	0.43542	0.492082	0.178433	-0.288612	0.451343	0.403642	0.281328	-0.0213192	0.956585	-0.0208645	0.957511	0.0897162	0.818453	-0.258718	0.501464
CL3510.Contig2_DB	black	0.712503	0.0312392	-0.567771	0.110781	0.674604	0.0462355	0.760852	0.0172716	-0.304189	0.426127	0.0125897	0.974356	0.652401	0.0568415	0.427535	0.251029	0.196486	0.612377	-0.482205	0.188653	0.86842	0.00238668	0.014834	0.969786	0.422024	0.257857	0.0882846	0.821312	0.557138	0.119152	0.628204	0.0700258	0.168011	0.66568	0.514525	0.156405	-0.141418	0.716664	0.280605	0.464548	0.0452818	0.90791	-0.23153	0.548897	0.0864304	0.825018	0.0226864	0.953803
CL19916.Contig1_DB	black	0.716899	0.02974	-0.632445	0.0675895	0.544759	0.12936	0.823326	0.00639128	-0.332624	0.38179	-0.0631589	0.871761	0.72771	0.0262556	0.547884	0.126735	0.232158	0.547782	-0.531284	0.141042	0.84947	0.00374873	-0.0828579	0.832166	0.31869	0.403238	0.242064	0.530321	0.605292	0.084134	0.484627	0.186117	0.249952	0.516573	0.412959	0.269297	-0.0881775	0.821526	0.288659	0.451266	-0.164631	0.6721	-0.112225	0.773764	0.0964508	0.805029	0.11025	0.777663
CL9432.Contig7_DB	black	0.573005	0.106794	-0.763104	0.0167491	0.578652	0.102592	0.922831	0.000389533	-0.308655	0.419016	-0.0965846	0.804763	0.740318	0.0225443	0.601005	0.0869534	0.305463	0.424093	-0.44806	0.226467	0.825174	0.0061722	-0.333695	0.380165	0.253133	0.51107	0.579905	0.101673	0.705948	0.0335645	0.395462	0.292115	0.497901	0.172561	0.344564	0.36385	0.085605	0.826668	0.52178	0.149641	-0.0122943	0.974958	-0.0445253	0.909444	0.330559	0.384934	-0.0430916	0.91235
CL28497.Contig1_DB	black	0.849287	0.00376404	-0.398673	0.287856	0.576216	0.104393	0.6434	0.061544	-0.324007	0.39499	-0.135914	0.727345	0.491053	0.179482	0.487851	0.182771	0.492825	0.177676	-0.632897	0.0673327	0.777951	0.0135655	0.230274	0.551128	0.219964	0.56957	0.0948171	0.808281	0.407664	0.2761	0.71818	0.0293121	-0.112371	0.773474	0.669508	0.0485468	-0.191787	0.621073	0.0144253	0.970618	-0.0568437	0.88451	-0.324798	0.39377	-0.308912	0.418609	0.167329	0.666974
Unigene32563_DB	black	0.866964	0.00247672	-0.351708	0.353314	0.581772	0.100314	0.620318	0.0747004	-0.288665	0.451255	-0.144968	0.709797	0.449572	0.224711	0.383615	0.30811	0.549271	0.125581	-0.603369	0.0853918	0.76663	0.0159522	0.311325	0.414791	0.284423	0.458231	0.0577551	0.882669	0.334871	0.378383	0.672864	0.0470166	-0.172346	0.657474	0.722826	0.0277944	-0.205452	0.5959	-0.013639	0.972219	-0.0161743	0.967057	-0.361868	0.338588	-0.34386	0.364897	0.116967	0.764417
CL4095.Contig1_DB	black	0.686659	0.0410517	-0.626434	0.0710583	0.550671	0.124422	0.855789	0.00324727	-0.299708	0.433316	-0.0735897	0.850759	0.694618	0.0378439	0.506181	0.1644	0.353084	0.351302	-0.446961	0.227748	0.893769	0.00115796	-0.0880402	0.8218	0.355555	0.347702	0.462505	0.210003	0.690436	0.0395082	0.468108	0.2038	0.276338	0.471652	0.547648	0.126932	0.0472134	0.903996	0.418139	0.262727	0.0534822	0.891306	-0.230525	0.550682	0.146903	0.706062	0.00911859	0.981425
CL3931.Contig1_DB	black	0.883618	0.0015774	-0.338764	0.372514	0.538352	0.13484	0.585173	0.097866	-0.343283	0.365756	-0.128528	0.741743	0.501399	0.169086	0.438184	0.238116	0.490969	0.179568	-0.554454	0.121322	0.761515	0.0171166	0.330148	0.385561	0.314714	0.409456	0.0260709	0.946919	0.356586	0.346206	0.65714	0.0544602	-0.213393	0.581439	0.71648	0.0298808	-0.15832	0.684134	-0.0540077	0.890243	-0.0766212	0.84467	-0.399731	0.286459	-0.342528	0.36688	0.224454	0.561511
CL7007.Contig3_DB	black	0.684455	0.0419698	-0.576823	0.103942	0.558577	0.117997	0.784548	0.0122916	-0.329019	0.387286	0.0143481	0.970775	0.752324	0.0193487	0.401059	0.284711	0.230279	0.551119	-0.245179	0.524874	0.906644	0.000746344	0.00654084	0.986676	0.593995	0.0916877	0.335124	0.378	0.675339	0.045908	0.396277	0.291031	0.19786	0.609843	0.600943	0.0869947	0.128937	0.740943	0.412171	0.270303	0.133051	0.732918	-0.365583	0.333281	0.239083	0.535551	0.0401881	0.91824
CL6638.Contig3_DB	black	0.504424	0.166113	-0.730315	0.0254581	0.698722	0.0362552	0.90404	0.000819652	-0.212777	0.582557	0.0568458	0.884506	0.749046	0.0201893	0.446472	0.228318	0.292362	0.445214	-0.307816	0.420349	0.861033	0.00286775	-0.27374	0.476	0.448589	0.225853	0.481441	0.189458	0.592721	0.0925648	0.376409	0.31805	0.502018	0.168474	0.405368	0.279078	0.0831575	0.831566	0.637132	0.0649596	0.0997141	0.79854	-0.100738	0.796507	0.482071	0.188795	-0.190013	0.624367
CL7176.Contig2_DB	black	0.702749	0.034739	-0.457641	0.21547	0.656557	0.0547497	0.730097	0.0255242	-0.186379	0.631132	0.00282187	0.994251	0.529598	0.142546	0.180341	0.642424	0.344372	0.364137	-0.392842	0.295616	0.876065	0.0019507	0.165383	0.67067	0.541165	0.132418	0.145133	0.709478	0.487641	0.182988	0.530735	0.14153	0.079315	0.839265	0.6813	0.0433074	-0.11304	0.772154	0.318671	0.403268	0.25698	0.504446	-0.352249	0.352523	0.0401817	0.918252	-0.151134	0.697913
CL21332.Contig2_DB	black	0.81724	0.00715031	-0.404352	0.280401	0.543761	0.130204	0.693807	0.038163	-0.241822	0.530745	-0.0903953	0.817098	0.510915	0.159836	0.390854	0.298285	0.472877	0.198604	-0.615958	0.0773658	0.833334	0.00526558	0.235169	0.542452	0.28724	0.453593	0.122661	0.753229	0.426278	0.252578	0.621951	0.0737169	-0.055698	0.886826	0.668675	0.0489315	-0.209948	0.587698	0.112203	0.773806	-0.0573833	0.88342	-0.287378	0.453367	-0.241645	0.531053	0.0761233	0.84567
Unigene40812_DB	black	0.632122	0.0677732	-0.642498	0.0620283	0.569488	0.109463	0.811669	0.00789674	-0.355712	0.347474	0.0275323	0.943947	0.84472	0.004159	0.475427	0.195855	0.284804	0.457603	-0.123671	0.751249	0.874643	0.00202722	-0.0929481	0.812006	0.637477	0.0647686	0.469064	0.202752	0.64481	0.0607921	0.272519	0.47805	0.285822	0.455926	0.556612	0.119575	0.275239	0.47349	0.498546	0.171917	0.0764474	0.845019	-0.345001	0.363202	0.402581	0.282715	0.0516466	0.89502
Unigene45353_DB	black	0.68782	0.0405733	-0.466688	0.205363	0.638622	0.0641369	0.73389	0.0243897	-0.0881611	0.821559	-0.0841562	0.829567	0.387291	0.3031	0.234701	0.543279	0.363236	0.336629	-0.793915	0.0106248	0.740666	0.0224469	0.0887218	0.820439	0.152359	0.695559	-0.0666872	0.864648	0.268133	0.485441	0.617422	0.0764642	0.130785	0.737336	0.399037	0.287375	-0.502928	0.167579	0.135538	0.728076	-0.121906	0.75471	0.0468472	0.904738	-0.184721	0.634226	-0.169985	0.66194
Unigene23177_DB	black	0.818623	0.00697271	-0.393091	0.295283	0.553496	0.122103	0.701069	0.0353666	-0.206397	0.594173	-0.0745796	0.84877	0.52966	0.142491	0.310913	0.415443	0.53314	0.139397	-0.546025	0.128293	0.835917	0.00499878	0.278891	0.467397	0.389083	0.300674	0.127287	0.744168	0.351479	0.35365	0.519347	0.151889	-0.0676306	0.862748	0.701572	0.0351781	-0.180562	0.642009	0.138301	0.722707	-0.062615	0.872858	-0.30381	0.426733	-0.195362	0.614453	0.0252773	0.948533
CL10889.Contig1_DB	black	0.537592	0.135499	-0.711091	0.0317307	0.474276	0.197093	0.768607	0.0155167	-0.452478	0.221359	-0.0934851	0.810935	0.840008	0.00459537	0.428437	0.249922	0.0959887	0.805949	0.0383429	0.921984	0.718655	0.0291546	-0.269483	0.483161	0.663236	0.0514914	0.525905	0.145872	0.724857	0.0271476	0.0586821	0.880796	0.402052	0.283408	0.353332	0.35094	0.417299	0.263787	0.465729	0.206421	0.16	0.680924	-0.280253	0.465132	0.541396	0.13222	0.0655929	0.866853
Unigene39840_DB	black	0.836188	0.00497132	-0.359391	0.34215	0.61547	0.0776682	0.654238	0.0559109	-0.204725	0.597231	-0.0328958	0.933046	0.535755	0.137099	0.377875	0.316015	0.626176	0.0712098	-0.568727	0.110046	0.795926	0.0102881	0.3307	0.384719	0.358428	0.34354	0.035556	0.927642	0.184952	0.633795	0.576886	0.103895	-0.139351	0.720671	0.709717	0.0322141	-0.222454	0.565095	0.0724242	0.853102	-0.197854	0.609854	-0.291944	0.445895	-0.236653	0.539831	0.0797925	0.838308
CL19052.Contig1_DB	black	0.857497	0.0031201	-0.348733	0.357684	0.514667	0.156271	0.585016	0.0979782	-0.381887	0.310479	-0.0435837	0.911352	0.61175	0.0799945	0.403555	0.281441	0.375955	0.318681	-0.339048	0.372088	0.831231	0.00548986	0.337441	0.374503	0.530042	0.142149	0.0797082	0.838477	0.478787	0.192267	0.565645	0.112425	-0.197225	0.611013	0.781314	0.0129055	0.0149099	0.969631	0.0573278	0.883532	0.0428602	0.91282	-0.541018	0.132543	-0.172936	0.656359	0.24817	0.519666
Unigene42566_DB	black	0.456796	0.216428	-0.67075	0.0479771	0.750642	0.0197769	0.82601	0.00607469	-0.148983	0.702052	-0.0579408	0.882294	0.451781	0.22216	0.488452	0.182152	0.356118	0.346885	-0.645458	0.0604481	0.709063	0.0324459	-0.330169	0.38553	0.0109448	0.977706	0.377424	0.316641	0.489432	0.181143	0.680608	0.0436041	0.483223	0.187585	0.291138	0.447211	-0.203935	0.598678	0.469095	0.202719	0.126953	0.744822	0.0770624	0.843785	0.19298	0.618862	-0.263857	0.492691
CL6142.Contig1_DB	black	0.720945	0.0284026	-0.440804	0.234994	0.742604	0.0219108	0.708203	0.0327522	-0.165391	0.670654	0.124485	0.749653	0.591091	0.0936948	0.321947	0.398176	0.39434	0.293611	-0.487139	0.183508	0.886234	0.00146063	0.208685	0.589998	0.476997	0.194173	-0.0158552	0.967707	0.311618	0.414329	0.659826	0.0531394	0.0296572	0.939627	0.657316	0.0543731	-0.232052	0.54797	0.278176	0.468588	-0.00802504	0.983652	-0.281325	0.463355	0.0114125	0.976753	-0.059563	0.879017
Unigene42122_DB	black	-0.598672	0.0885123	0.61798	0.0761223	-0.567967	0.11063	-0.844311	0.00419573	0.239426	0.53495	0.0606844	0.876753	-0.663097	0.0515581	-0.366626	0.331797	-0.408545	0.274963	0.281708	0.46272	-0.8502	0.00368831	0.109256	0.779627	-0.468895	0.202938	-0.557472	0.118883	-0.632985	0.067283	-0.319604	0.401814	-0.325472	0.392731	-0.56679	0.111538	-0.155784	0.688987	-0.518552	0.152629	-0.200894	0.604257	0.263987	0.49247	-0.283571	0.459638	0.133105	0.732813
CL12176.Contig1_DB	black	0.786731	0.0118885	-0.368626	0.328963	0.631812	0.0679496	0.606786	0.0831646	-0.307217	0.4213	0.0462031	0.906043	0.60357	0.0852593	0.284383	0.458297	0.345624	0.362278	-0.266108	0.488868	0.857911	0.00308975	0.31485	0.409243	0.642902	0.0618116	0.0379538	0.922774	0.433749	0.24345	0.568322	0.110357	-0.125935	0.746814	0.787994	0.0116594	-0.00356496	0.992738	0.176559	0.649529	0.176315	0.649989	-0.53945	0.133891	-0.0297786	0.93938	0.0851541	0.82757
Unigene31761_DB	black	0.542722	0.131087	-0.615702	0.0775244	0.455202	0.218241	0.644608	0.0608996	-0.421246	0.258827	-0.384108	0.307436	0.378007	0.315831	0.76483	0.0163558	0.366636	0.331783	-0.689716	0.0397998	0.427952	0.250517	-0.376655	0.317708	-0.310826	0.415581	0.466242	0.205855	0.533801	0.138815	0.605303	0.0841269	0.313952	0.410653	0.14118	0.717124	-0.0555733	0.887078	0.0624383	0.873214	-0.091247	0.815398	0.0813049	0.835277	-0.120993	0.756502	0.159631	0.681629
CL7469.Contig2_DB	black	0.494435	0.176044	-0.581541	0.100482	0.799829	0.00965505	0.73254	0.0247896	-0.152599	0.695097	-0.0298628	0.939209	0.397776	0.289043	0.475276	0.196017	0.407266	0.276616	-0.649662	0.0582476	0.669158	0.0487085	-0.205614	0.595604	0.0180998	0.963137	0.226275	0.558253	0.352359	0.352361	0.774319	0.014303	0.337693	0.374125	0.355235	0.348167	-0.259762	0.499676	0.352899	0.351572	0.109286	0.779568	0.00955107	0.980544	0.0845529	0.828773	-0.217047	0.574827
Unigene36729_DB	black	0.740618	0.0224604	-0.414037	0.267923	0.651912	0.0570913	0.711355	0.0316383	-0.187689	0.62869	0.0419343	0.914697	0.534818	0.137921	0.304833	0.425098	0.424919	0.254259	-0.476698	0.194493	0.908867	0.000687526	0.224061	0.562215	0.444043	0.231167	0.144818	0.710086	0.467608	0.20435	0.657042	0.0545087	0.00409696	0.991654	0.747934	0.0204796	-0.144166	0.711346	0.288026	0.452303	0.155422	0.689682	-0.382985	0.308973	-0.0623611	0.87337	-0.0572057	0.883779
CL10089.Contig2_DB	black	0.558127	0.118357	-0.640253	0.0632444	0.670661	0.0480178	0.87773	0.00186368	-0.163047	0.675114	0.0250334	0.949029	0.613826	0.0786907	0.492837	0.177664	0.396217	0.291111	-0.531521	0.140832	0.883736	0.00157199	-0.177464	0.647828	0.231856	0.548317	0.460273	0.212502	0.595356	0.0907566	0.58641	0.096985	0.393619	0.294576	0.490335	0.180216	-0.0709647	0.856037	0.549023	0.125787	0.0862391	0.8254	-0.10535	0.787357	0.221573	0.566677	-0.168573	0.664614
CL6080.Contig1_DB	black	0.799135	0.00976558	-0.388587	0.301345	0.614797	0.0780855	0.702467	0.0348441	-0.184407	0.634813	0.000975213	0.998013	0.557819	0.118605	0.40206	0.283398	0.624585	0.0721473	-0.547572	0.126996	0.857851	0.00309417	0.279165	0.466941	0.357504	0.344876	0.162387	0.676371	0.292852	0.444416	0.59607	0.0902707	-0.0691287	0.859732	0.746842	0.0207677	-0.162986	0.67523	0.194058	0.616865	-0.110972	0.776237	-0.320373	0.400618	-0.164864	0.671657	0.0364369	0.925853
Unigene41480_DB	black	0.82991	0.00563412	-0.382234	0.310002	0.497446	0.173016	0.651155	0.0574787	-0.317502	0.405091	-0.0834077	0.831065	0.557498	0.118862	0.509988	0.160724	0.494611	0.175867	-0.535776	0.137081	0.831258	0.00548694	0.2477	0.520483	0.285438	0.456557	0.208099	0.591066	0.483022	0.187796	0.640426	0.0631504	-0.111008	0.776166	0.729529	0.025697	-0.0746044	0.84872	0.100364	0.797248	-0.0593181	0.879512	-0.397006	0.290063	-0.245388	0.52451	0.207538	0.592089
CL10311.Contig2_DB	black	0.709657	0.0322352	-0.474149	0.19723	0.563306	0.114251	0.77777	0.0136015	-0.131074	0.736772	-0.00758688	0.984545	0.583692	0.098928	0.173075	0.656099	0.382322	0.309881	-0.450443	0.223703	0.871173	0.00222265	0.162235	0.676662	0.51935	0.151887	0.14968	0.70071	0.409143	0.274191	0.362477	0.337715	0.116693	0.764957	0.593088	0.0923118	-0.168117	0.66548	0.31563	0.40802	0.00519364	0.98942	-0.206616	0.593773	0.0394384	0.919761	-0.137701	0.723873
CL7087.Contig1_DB	black	0.635602	0.0658109	-0.619032	0.0754807	0.570073	0.109016	0.784453	0.0123093	-0.352262	0.352503	0.0894626	0.818959	0.903786	0.000827053	0.522571	0.148914	0.326443	0.391237	-0.081965	0.833954	0.866738	0.00249091	-0.0498905	0.898575	0.67373	0.0466267	0.42593	0.253007	0.542636	0.131161	0.237766	0.53787	0.243041	0.528609	0.561888	0.115367	0.29315	0.443931	0.486088	0.184596	-0.0653495	0.867344	-0.346588	0.36085	0.42488	0.254306	0.116932	0.764486
Unigene31710_DB	black	0.538662	0.134572	-0.614115	0.0785105	0.569298	0.109609	0.718163	0.029318	-0.409484	0.273753	-0.133667	0.731717	0.604671	0.0845388	0.631214	0.068291	0.410327	0.272668	-0.216949	0.575005	0.70583	0.0336075	-0.241155	0.531913	0.257349	0.503812	0.69887	0.0361989	0.719525	0.0288673	0.501981	0.168512	0.301016	0.431212	0.543898	0.130088	0.343635	0.365232	0.439112	0.237008	0.323881	0.395185	-0.369944	0.327103	0.251934	0.513141	0.0481831	0.902032
CL11862.Contig3_DB	black	-0.482333	0.188519	0.762285	0.0169378	-0.504903	0.165645	-0.873582	0.00208567	0.343168	0.365928	0.0448203	0.908846	-0.79979	0.0096612	-0.577179	0.103678	-0.164686	0.671994	0.231911	0.548219	-0.795434	0.0103697	0.386854	0.303694	-0.37444	0.320794	-0.634898	0.0662049	-0.782979	0.012587	-0.258251	0.502264	-0.540449	0.133032	-0.305023	0.424796	-0.255587	0.506839	-0.594132	0.0915938	-0.0612753	0.875561	0.107549	0.783005	-0.496526	0.173938	0.00826609	0.983161
Unigene4920_DB	black	0.669141	0.0487162	-0.484679	0.186063	0.55029	0.124737	0.712433	0.0312634	-0.185317	0.633114	-0.00736128	0.985004	0.530708	0.141555	0.240285	0.53344	0.105537	0.786987	-0.57632	0.104315	0.8048	0.00888763	0.0737647	0.850407	0.360263	0.340894	-0.0664781	0.86507	0.474302	0.197065	0.523334	0.148214	0.145205	0.709339	0.401165	0.284573	-0.327719	0.389278	0.198975	0.607788	-0.0443733	0.909752	-0.0850477	0.827783	-0.0239906	0.95115	-0.0509706	0.896388
CL4097.Contig1_DB	black	0.644773	0.0608117	-0.556439	0.119715	0.648044	0.0590887	0.773986	0.014372	-0.267975	0.485708	0.10742	0.783259	0.797569	0.0100182	0.471978	0.199578	0.481297	0.189609	-0.164059	0.673187	0.883127	0.00160002	0.0334739	0.931871	0.615596	0.0775901	0.418356	0.262454	0.451691	0.222264	0.361709	0.338816	0.180874	0.641425	0.672083	0.0473698	0.208747	0.589885	0.490801	0.17974	0.0149811	0.969486	-0.380914	0.311817	0.325038	0.393399	0.0164449	0.966506
CL5109.Contig2_DB	black	0.740778	0.0224158	-0.495838	0.17463	0.563965	0.113735	0.750417	0.0198347	-0.278305	0.468372	0.087949	0.821983	0.804462	0.00893854	0.456632	0.216614	0.461466	0.211164	-0.243124	0.528464	0.909072	0.000682261	0.161982	0.677144	0.620671	0.074487	0.29617	0.439029	0.434551	0.24248	0.353951	0.350037	0.0605072	0.877111	0.698904	0.0361859	0.120494	0.757482	0.36514	0.33391	-0.124127	0.750354	-0.387952	0.302205	0.171142	0.659751	0.118626	0.761154
CL9987.Contig3_DB	black	0.393739	0.294415	-0.6932	0.0384031	0.686653	0.0410542	0.761265	0.017175	-0.228463	0.55435	-0.0738097	0.850317	0.469624	0.20214	0.559028	0.117637	0.173619	0.655071	-0.591473	0.0934291	0.61424	0.0784326	-0.434538	0.242495	-0.0400795	0.91846	0.327374	0.389807	0.534979	0.137779	0.648342	0.0589333	0.525735	0.146026	0.133904	0.731256	-0.163488	0.674273	0.412108	0.270384	0.0765401	0.844833	0.133817	0.731426	0.245088	0.525032	-0.158079	0.684594
CL12360.Contig1_DB	black	0.889904	0.00130711	-0.190922	0.622679	0.489423	0.181152	0.366617	0.331811	-0.44612	0.22873	-0.0965948	0.804742	0.490532	0.180015	0.324511	0.394211	0.383023	0.308921	-0.242579	0.529419	0.649686	0.0582351	0.506062	0.164516	0.560425	0.116524	-0.152532	0.695226	0.267648	0.486261	0.560852	0.116186	-0.442084	0.233477	0.798757	0.00982613	0.0104026	0.97881	-0.216697	0.57546	0.045121	0.908236	-0.646939	0.0596671	-0.343351	0.365655	0.366517	0.331952
CL21013.Contig2_DB	black	0.860015	0.00293892	-0.312553	0.412855	0.47434	0.197024	0.581006	0.10087	-0.322819	0.396826	-0.0444059	0.909686	0.573307	0.106567	0.44138	0.234311	0.463702	0.208669	-0.458476	0.214526	0.814106	0.00756394	0.365508	0.333387	0.401203	0.284522	0.0697653	0.858451	0.393679	0.294495	0.583825	0.0988318	-0.221926	0.566043	0.760104	0.0174476	-0.0786001	0.840699	0.0215647	0.956086	-0.11214	0.773931	-0.455121	0.218334	-0.272472	0.478129	0.26277	0.494542
CL5560.Contig1_DB	black	0.493844	0.176642	-0.676201	0.0455257	0.588504	0.0955043	0.830898	0.00552599	-0.288976	0.450747	0.0317813	0.93531	0.747775	0.0205214	0.571611	0.107848	0.327574	0.3895	-0.217952	0.573195	0.830361	0.00558452	-0.265063	0.490643	0.388475	0.301496	0.63816	0.0643913	0.69004	0.0396685	0.387134	0.303313	0.43174	0.245887	0.477856	0.193257	0.259301	0.500467	0.617108	0.076657	0.143939	0.711786	-0.235534	0.541806	0.438294	0.237984	-0.0439561	0.910597
Unigene2155_DB	black	0.506517	0.164074	-0.553384	0.122194	0.743055	0.0217872	0.864642	0.00262509	0.0770631	0.843783	0.0631526	0.871773	0.440681	0.235141	0.153599	0.693177	0.478799	0.192253	-0.631773	0.0679715	0.833096	0.0052907	-0.0580375	0.882098	0.266486	0.488228	0.229967	0.551673	0.291541	0.446553	0.502859	0.167647	0.375804	0.318892	0.447988	0.226551	-0.354523	0.349203	0.530881	0.1414	0.0659235	0.866187	0.0615837	0.874939	0.162626	0.675917	-0.461925	0.210651
CL3817.Contig1_DB	black	0.701591	0.035171	-0.365441	0.333483	0.706072	0.0335195	0.606171	0.0835626	-0.186202	0.631461	0.161919	0.677264	0.554085	0.121622	0.305252	0.42443	0.290368	0.448468	-0.440012	0.235936	0.844199	0.00420578	0.266866	0.487585	0.485926	0.184765	-0.136214	0.726762	0.300398	0.432205	0.702409	0.0348657	-0.0561048	0.886004	0.652326	0.05688	-0.241275	0.531702	0.201716	0.602748	0.0114651	0.976646	-0.335755	0.377046	-0.0344404	0.929908	0.0118216	0.97592
CL2244.Contig5_DB	black	0.739382	0.0228069	-0.369159	0.32821	0.484434	0.186319	0.605352	0.0840949	-0.27138	0.479965	0.00357362	0.99272	0.522749	0.148751	0.323506	0.395764	0.144439	0.71082	-0.497271	0.173191	0.824994	0.00619323	0.224144	0.562066	0.382588	0.309516	-0.044688	0.909114	0.541322	0.132283	0.626792	0.0708485	-0.0536392	0.890989	0.58489	0.0980688	-0.205746	0.595364	0.108875	0.78038	0.0311781	0.936536	-0.324435	0.394329	-0.158939	0.682951	0.127623	0.743511
CL3179.Contig2_DB	black	0.688285	0.0403826	-0.442216	0.233321	0.534135	0.138521	0.709857	0.0321646	-0.127433	0.743884	0.0249697	0.949158	0.529503	0.14263	0.350515	0.355063	0.280462	0.464786	-0.69629	0.0371913	0.801144	0.00944778	0.125281	0.748095	0.222728	0.564604	-0.05357	0.891129	0.333943	0.379789	0.565277	0.112711	0.093581	0.810744	0.420513	0.259746	-0.399375	0.286929	0.171502	0.65907	-0.277328	0.470001	-0.0173422	0.96468	-0.125366	0.747927	0.00441223	0.991012
CL24466.Contig3_DB	black	0.599192	0.0881635	-0.543273	0.130619	0.660522	0.0528002	0.841154	0.00448649	-0.0753565	0.84721	0.113263	0.771716	0.624001	0.0724935	0.467984	0.203937	0.526087	0.145707	-0.570911	0.108379	0.903968	0.000821731	-0.0104019	0.978811	0.258493	0.50185	0.34183	0.367922	0.39418	0.293826	0.567592	0.110918	0.266229	0.488663	0.560465	0.116493	-0.164039	0.673225	0.50058	0.169895	-0.125026	0.748594	-0.0984644	0.801024	0.131327	0.736278	-0.137748	0.723781
Unigene44303_DB	black	0.593297	0.0921678	-0.526624	0.145221	0.546783	0.127657	0.779868	0.0131865	-0.126469	0.745769	0.0738089	0.850319	0.575179	0.105165	0.288749	0.451118	0.10062	0.796741	-0.569051	0.109798	0.879719	0.00176327	-0.0108233	0.977953	0.333653	0.380229	0.0767924	0.844326	0.568214	0.11044	0.532852	0.139652	0.263098	0.493983	0.404758	0.279872	-0.284477	0.458143	0.376733	0.317599	-0.0207551	0.957733	-0.0598457	0.878447	0.0939774	0.809954	-0.110622	0.776928
CL22036.Contig6_DB	black	0.626001	0.0713123	-0.425584	0.253435	0.712611	0.0312017	0.722362	0.0279436	-0.0980671	0.801813	0.136094	0.726996	0.503728	0.166794	0.330293	0.38534	0.438852	0.237318	-0.498931	0.171533	0.907629	0.000719868	0.140799	0.717863	0.358302	0.343722	0.185806	0.6322	0.431208	0.246534	0.727082	0.0264502	0.102258	0.793488	0.706197	0.0334741	-0.179162	0.644637	0.414302	0.267585	0.171993	0.658141	-0.309165	0.418208	0.0280004	0.942995	-0.15656	0.687501
CL16136.Contig1_DB	black	0.716975	0.0297146	-0.426542	0.252253	0.52664	0.145206	0.715904	0.0300751	-0.195388	0.614405	0.136971	0.72529	0.727801	0.0262273	0.303282	0.427577	0.333682	0.380184	-0.286756	0.45439	0.930391	0.000273595	0.237643	0.538086	0.643257	0.0616208	0.141638	0.716238	0.440001	0.235949	0.373457	0.322168	0.0267668	0.945504	0.685563	0.0415066	-0.0167169	0.965952	0.347301	0.359796	-0.0779306	0.842042	-0.364475	0.334859	0.113918	0.770423	0.0498214	0.898714
CL13629.Contig1_DB	black	0.705669	0.0336659	-0.450704	0.223403	0.491522	0.179003	0.697631	0.0366733	-0.281703	0.462727	0.126384	0.745935	0.77641	0.0138751	0.373576	0.322001	0.249559	0.517254	-0.194177	0.616645	0.925481	0.000345599	0.185571	0.63264	0.671187	0.0477776	0.206745	0.593538	0.556889	0.119352	0.366236	0.332351	0.0419157	0.914735	0.68047	0.0436635	0.10689	0.784307	0.358598	0.343294	-0.0143486	0.970774	-0.435191	0.241708	0.171746	0.658607	0.133458	0.732124
Unigene29152_DB	black	0.536977	0.136033	-0.58615	0.09717	0.456411	0.216866	0.742967	0.0218112	-0.259909	0.499426	-0.157607	0.685497	0.482815	0.188014	0.697799	0.0366088	0.356138	0.346856	-0.707154	0.0331285	0.66113	0.0525053	-0.264674	0.491302	-0.170199	0.661534	0.4591	0.213822	0.58681	0.0967012	0.621305	0.074105	0.335855	0.376896	0.277984	0.468907	-0.126648	0.745418	0.282465	0.461467	-0.147752	0.704423	0.0503016	0.897742	-0.0373522	0.923995	0.0720078	0.853939
CL14103.Contig3_DB	black	0.81782	0.00707539	-0.251547	0.51381	0.467855	0.204079	0.562395	0.114967	-0.219972	0.569556	-0.0599616	0.878213	0.428071	0.250371	0.322721	0.396977	0.50793	0.162705	-0.537707	0.135399	0.795414	0.0103731	0.398573	0.287989	0.316119	0.407254	0.0659913	0.86605	0.364588	0.334698	0.62925	0.0694196	-0.23152	0.548914	0.781538	0.0128623	-0.178633	0.64563	0.028694	0.941585	-0.0042778	0.991285	-0.426653	0.252115	-0.359401	0.342136	0.131747	0.735459
Unigene36009_DB	black	0.591468	0.0934324	-0.599934	0.0876667	0.40463	0.28004	0.779472	0.0132642	-0.333998	0.379704	-0.0592321	0.879686	0.697329	0.0367895	0.723536	0.0275673	0.317378	0.405285	-0.4579	0.215178	0.804831	0.00888295	-0.189432	0.625447	0.12939	0.740058	0.570478	0.108708	0.729241	0.0257849	0.482322	0.188531	0.299789	0.433184	0.436801	0.239772	0.121782	0.754953	0.403282	0.281798	-0.116714	0.764915	-0.167037	0.667529	0.128325	0.742139	0.182652	0.638095
CL9019.Contig1_DB	black	0.484216	0.186546	-0.471509	0.200086	0.768224	0.0156003	0.73556	0.0239011	0.0479066	0.902592	0.093163	0.811577	0.322653	0.397082	0.170111	0.661701	0.314238	0.410204	-0.705977	0.033554	0.771133	0.0149719	-0.0215349	0.956146	0.151916	0.69641	0.00617453	0.987422	0.292119	0.44561	0.731904	0.0249795	0.281808	0.462555	0.407392	0.276452	-0.484687	0.186055	0.394451	0.293464	0.133813	0.731433	0.0414936	0.915591	0.0304611	0.937993	-0.395716	0.291778
CL1059.Contig12_DB	black	0.442318	0.233201	-0.596786	0.0897848	0.717977	0.0293796	0.866576	0.00250111	0.0399707	0.918681	0.0851949	0.827489	0.469959	0.201775	0.347018	0.360214	0.438309	0.237966	-0.674571	0.0462502	0.814152	0.00755784	-0.190289	0.623854	0.100725	0.796532	0.326395	0.39131	0.370398	0.326462	0.588741	0.0953378	0.45827	0.214759	0.36607	0.332588	-0.315507	0.408213	0.576444	0.104223	-0.00701318	0.985713	0.120443	0.757583	0.200301	0.605348	-0.375866	0.318806
CL16632.Contig1_DB	black	0.389421	0.300217	-0.652348	0.056869	0.378359	0.315344	0.665711	0.0503165	-0.393978	0.294096	-0.333212	0.380898	0.376165	0.31839	0.669723	0.048448	0.14572	0.708345	-0.523881	0.147714	0.467641	0.204314	-0.514724	0.156217	-0.234843	0.543028	0.629296	0.0693932	0.79309	0.010765	0.523413	0.148142	0.478041	0.19306	0.103024	0.791968	0.087978	0.821925	0.272345	0.478343	0.191615	0.621392	0.0367251	0.925268	0.0892065	0.819471	0.0478692	0.902668
CL480.Contig1_DB	black	0.638913	0.0639774	-0.412713	0.269611	0.622142	0.073602	0.654854	0.0556009	-0.217707	0.573638	0.185261	0.633218	0.654468	0.0557952	0.27442	0.474862	0.225085	0.560382	-0.198118	0.609366	0.915267	0.000536272	0.193593	0.617726	0.66276	0.0517195	0.123359	0.75186	0.522817	0.148688	0.529252	0.142855	0.0426941	0.913156	0.719526	0.0288669	0.0309072	0.937086	0.398084	0.288635	0.212418	0.583209	-0.473868	0.197533	0.180917	0.641344	-0.0136893	0.972117
CL22626.Contig1_DB	black	0.646207	0.0600523	-0.481679	0.189207	0.564078	0.113647	0.802338	0.00926241	-0.109036	0.780062	0.106323	0.78543	0.618059	0.0760741	0.450732	0.22337	0.451491	0.222495	-0.554955	0.120916	0.9443	0.000127139	0.0785154	0.840869	0.290663	0.447986	0.3211	0.399489	0.504027	0.166501	0.583412	0.0991293	0.173525	0.655248	0.631361	0.0682071	-0.141364	0.716768	0.448658	0.225772	-0.0791069	0.839683	-0.20151	0.603126	0.0413182	0.915947	-0.0518813	0.894545
CL6419.Contig3_DB	black	0.850187	0.00368939	-0.216706	0.575444	0.438154	0.238152	0.497434	0.173028	-0.238982	0.535729	-0.0542355	0.889783	0.495383	0.175087	0.295074	0.440804	0.547044	0.127438	-0.448467	0.225994	0.703831	0.0343391	0.479729	0.191267	0.424336	0.25498	-0.0800455	0.837801	0.134985	0.729153	0.443505	0.2318	-0.319924	0.401317	0.718702	0.029139	-0.171632	0.658825	-0.0955342	0.806853	-0.253168	0.511008	-0.382483	0.30966	-0.350134	0.355623	0.224632	0.561191
Unigene31530_DB	black	0.519145	0.152077	-0.601243	0.0867956	0.420959	0.259187	0.628516	0.0698445	-0.47235	0.199174	-0.161016	0.678984	0.615833	0.0774436	0.899618	0.000955357	0.29601	0.439287	-0.422447	0.257329	0.559634	0.117153	-0.326098	0.391768	-0.0753177	0.847288	0.54295	0.130894	0.627612	0.0703702	0.553192	0.122351	0.284042	0.45886	0.269593	0.482975	0.192621	0.619526	0.227265	0.556486	-0.148967	0.702083	-0.11985	0.758748	0.0957601	0.806404	0.327364	0.389823
CL27288.Contig1_DB	black	0.469881	0.20186	-0.599308	0.0880852	0.605518	0.0839872	0.846243	0.00402426	-0.0510452	0.896237	0.09573	0.806464	0.538014	0.135133	0.307393	0.421021	0.130364	0.738158	-0.597458	0.08933	0.873682	0.00208012	-0.177525	0.647712	0.226398	0.558034	0.231265	0.549366	0.601836	0.0864022	0.558069	0.118404	0.443197	0.232164	0.3354	0.377584	-0.278599	0.467883	0.545021	0.129138	0.0675183	0.862974	0.0437214	0.911073	0.223324	0.563535	-0.265052	0.490661
CL2829.Contig2_DB	black	0.446738	0.228008	-0.540833	0.132702	0.722652	0.0278504	0.761952	0.0170151	-0.0265344	0.945976	0.0247875	0.949529	0.355911	0.347185	0.415411	0.266177	0.411967	0.270565	-0.733569	0.0244845	0.722004	0.0280592	-0.182801	0.637815	-0.0486098	0.901168	0.257509	0.503537	0.370958	0.325674	0.755979	0.0184394	0.370166	0.326789	0.355282	0.3481	-0.349157	0.357059	0.433256	0.244046	0.0624023	0.873287	0.0809144	0.836059	0.0536593	0.890948	-0.293286	0.44371
Unigene42316_DB	black	0.488437	0.182166	-0.474846	0.196479	0.62273	0.0732508	0.713829	0.0307819	-0.0481338	0.902132	-0.0592896	0.87957	0.244829	0.525485	0.269021	0.483941	0.251411	0.514046	-0.767364	0.0157896	0.72666	0.0265816	-0.105558	0.786947	-0.0375338	0.923626	0.171211	0.65962	0.522482	0.148995	0.7829	0.0126021	0.29053	0.448204	0.380631	0.312206	-0.409928	0.273181	0.329001	0.387314	0.246795	0.522058	0.0105849	0.978439	-0.0935754	0.810755	-0.295932	0.439414
Unigene27848_DB	black	0.423271	0.256303	-0.646459	0.0599194	0.611	0.0804683	0.757453	0.0180806	-0.264319	0.491906	0.0752085	0.847507	0.633943	0.0667418	0.602987	0.0856426	0.122965	0.752632	-0.385712	0.305246	0.772149	0.0147562	-0.32001	0.401182	0.18687	0.630216	0.416637	0.264623	0.691296	0.0391623	0.605808	0.0837984	0.448394	0.226079	0.325964	0.391973	0.0411119	0.916365	0.535153	0.137627	0.119487	0.759461	-0.105491	0.787078	0.346723	0.360651	-0.0329966	0.932841
CL22245.Contig2_DB	black	0.536448	0.136495	-0.469233	0.202568	0.661832	0.0521661	0.747799	0.0205152	0.00964045	0.980362	0.152939	0.694445	0.483382	0.187419	0.0766334	0.844646	0.145532	0.708708	-0.540107	0.133325	0.853722	0.0034059	0.0664088	0.865209	0.428829	0.249441	-0.0745419	0.848846	0.367163	0.331036	0.519884	0.151392	0.245236	0.524775	0.422726	0.256981	-0.401411	0.28425	0.406522	0.27758	0.058591	0.88098	-0.0313162	0.936255	0.131239	0.736449	-0.308816	0.418761
CL24414.Contig2_DB	black	0.537603	0.13549	-0.390803	0.298354	0.688893	0.0401343	0.687976	0.0405091	0.00225094	0.995414	-0.00858515	0.982512	0.229807	0.551958	0.186524	0.630861	0.451937	0.221981	-0.682081	0.0429737	0.769035	0.0154235	0.0634378	0.871198	0.0977925	0.80236	0.184204	0.635193	0.397754	0.289072	0.782903	0.0126015	0.15923	0.682396	0.585554	0.0975942	-0.358776	0.343037	0.345352	0.362681	0.323442	0.395862	-0.148023	0.703901	-0.125101	0.748447	-0.347277	0.359831
Unigene31214_DB	black	0.71886	0.0290867	-0.33021	0.385468	0.540035	0.133387	0.649284	0.0584433	-0.124726	0.749181	0.0324314	0.933989	0.424142	0.255221	0.366412	0.332101	0.415057	0.266627	-0.68336	0.042431	0.852731	0.00348375	0.251343	0.514163	0.182835	0.637751	0.0601878	0.877756	0.416324	0.26502	0.752269	0.0193625	-0.0490986	0.900178	0.663278	0.0514714	-0.323728	0.395421	0.17833	0.6462	-0.0330055	0.932823	-0.250915	0.514905	-0.266185	0.488738	0.0118658	0.97583
CL15281.Contig2_DB	black	0.570739	0.108509	-0.543753	0.130211	0.464661	0.207604	0.773041	0.014569	-0.165335	0.670761	0.0536084	0.891051	0.604267	0.0848029	0.399879	0.286265	0.0658127	0.86641	-0.582896	0.0995008	0.852822	0.00347656	-0.0773457	0.843216	0.239673	0.534515	0.146118	0.707576	0.626717	0.0708925	0.513113	0.157741	0.294699	0.441413	0.339073	0.37205	-0.240099	0.533766	0.368897	0.32858	-0.113525	0.771199	-0.0188251	0.961661	0.0928636	0.812174	-0.0162931	0.966815
CL19507.Contig1_DB	black	0.719846	0.0287618	-0.305746	0.423643	0.45188	0.222046	0.565644	0.112426	-0.216913	0.575071	-0.00146776	0.99701	0.440206	0.235704	0.211308	0.585225	0.144631	0.710448	-0.492615	0.177889	0.804446	0.00894088	0.28375	0.459342	0.389058	0.300707	-0.079121	0.839654	0.514277	0.156639	0.606933	0.0830696	-0.0968243	0.804286	0.609493	0.0814262	-0.243579	0.527668	0.0888773	0.820128	0.101915	0.79417	-0.341074	0.369052	-0.211878	0.584189	0.0680102	0.861984
CL11252.Contig1_DB	black	0.487557	0.183075	-0.635258	0.0660031	0.590476	0.0941227	0.833244	0.00527509	-0.16343	0.674384	0.163202	0.67482	0.845996	0.00404594	0.420212	0.260122	0.382342	0.309854	-0.130523	0.737847	0.839054	0.00468737	-0.139544	0.720296	0.598821	0.0884124	0.466542	0.205524	0.410436	0.272528	0.145069	0.709601	0.397659	0.289198	0.449139	0.225213	0.189246	0.625792	0.639812	0.0634849	-0.131793	0.735369	-0.144615	0.710479	0.539068	0.134221	-0.0975	0.802941
Unigene45530_DB	black	0.523634	0.14794	-0.525477	0.14626	0.586731	0.0967574	0.769081	0.0154134	-0.108085	0.781943	0.00430747	0.991225	0.440002	0.235947	0.528181	0.143817	0.38026	0.312718	-0.724848	0.0271505	0.793197	0.0107468	-0.135193	0.728748	-0.0448123	0.908862	0.34551	0.362447	0.533788	0.138826	0.742177	0.0220281	0.305493	0.424045	0.425891	0.253056	-0.25369	0.510108	0.406124	0.278097	-0.00296044	0.993969	-0.0159439	0.967526	-0.0147279	0.970002	-0.116432	0.765469
CL7132.Contig1_DB	black	0.722053	0.0280433	-0.249707	0.516997	0.519701	0.151561	0.545402	0.128817	-0.186138	0.631581	-0.0240321	0.951066	0.343286	0.365751	0.194689	0.615697	0.370679	0.326067	-0.45954	0.213326	0.805852	0.00873072	0.344217	0.364366	0.365928	0.33279	0.0744462	0.849038	0.482826	0.188002	0.69479	0.0377765	-0.162832	0.675523	0.792309	0.010899	-0.159681	0.681534	0.129895	0.739073	0.30821	0.419724	-0.487167	0.183479	-0.266906	0.487516	-0.015378	0.968678
CL9229.Contig2_DB	black	0.643637	0.0614173	-0.362096	0.338261	0.627735	0.0702982	0.592014	0.093054	-0.175956	0.650666	0.157898	0.684941	0.505782	0.164788	0.319771	0.401555	0.148665	0.702666	-0.500971	0.169509	0.833331	0.00526593	0.199819	0.606234	0.372349	0.323721	-0.136006	0.727165	0.416715	0.264525	0.746442	0.0208738	-0.00366006	0.992544	0.567937	0.110653	-0.288523	0.451489	0.209857	0.587864	0.0361576	0.926421	-0.275777	0.47259	-0.0583268	0.881514	0.0219729	0.955255
CL13797.Contig3_DB	black	0.48413	0.186637	-0.539516	0.133835	0.602239	0.0861363	0.72974	0.0256326	-0.164848	0.671686	0.12487	0.748898	0.543429	0.130487	0.414887	0.266842	0.0521097	0.894083	-0.505546	0.165017	0.84201	0.00440637	-0.131248	0.736431	0.234174	0.54421	0.17301	0.656221	0.651357	0.0573752	0.68607	0.0412959	0.324436	0.394328	0.393457	0.294792	-0.183938	0.635689	0.456469	0.216799	0.13637	0.72646	-0.115308	0.767683	0.180246	0.642603	-0.0976184	0.802706
CL1924.Contig2_DB	black	0.696941	0.0369393	-0.331368	0.383701	0.493308	0.177186	0.679086	0.0442619	-0.066082	0.865868	0.00231322	0.995288	0.393558	0.294657	0.277936	0.468987	0.43651	0.240121	-0.695225	0.0376062	0.848367	0.00384139	0.242655	0.529285	0.183906	0.635749	0.106652	0.784779	0.411892	0.270661	0.652727	0.0566761	-0.00890792	0.981854	0.640232	0.0632556	-0.343098	0.366031	0.210979	0.585822	-0.0272338	0.944554	-0.196597	0.612173	-0.259428	0.500249	-0.0687147	0.860565
CL13745.Contig2_DB	black	0.594714	0.091195	-0.469147	0.202663	0.604796	0.0844571	0.791501	0.0110389	-0.00257934	0.994745	0.146815	0.70623	0.654026	0.056018	0.258107	0.502512	0.589418	0.094863	-0.390459	0.298817	0.854001	0.00338414	0.12746	0.74383	0.491848	0.17867	0.256144	0.505882	0.180377	0.642356	0.271922	0.479054	0.18568	0.632435	0.577973	0.103092	-0.120211	0.758038	0.475172	0.196129	-0.222872	0.564345	-0.112569	0.773085	0.195103	0.614933	-0.187026	0.629926
Unigene36179_DB	black	0.466017	0.206103	-0.540828	0.132706	0.632119	0.0677748	0.821545	0.00660745	0.0219197	0.955364	0.155411	0.689702	0.506486	0.164103	0.185056	0.6336	0.144973	0.709787	-0.573652	0.106308	0.890602	0.00127923	-0.0812542	0.835378	0.311581	0.414387	0.133068	0.732885	0.511991	0.158809	0.542083	0.131632	0.389528	0.300073	0.384754	0.306554	-0.338005	0.373655	0.549361	0.125506	0.0894815	0.818922	0.0207944	0.957653	0.214372	0.579666	-0.336108	0.376514
CL3539.Contig3_DB	black	0.7071	0.0331479	-0.389613	0.299958	0.470531	0.201151	0.625899	0.0713722	-0.296373	0.4387	0.15688	0.686888	0.709882	0.0321559	0.479115	0.191918	0.169099	0.663617	-0.329693	0.386256	0.913495	0.000575553	0.211399	0.585059	0.496793	0.17367	0.0904427	0.817003	0.585258	0.0978055	0.577878	0.103162	-0.0289378	0.94109	0.659976	0.0530662	-0.00999262	0.979645	0.265512	0.489881	-0.0656016	0.866836	-0.423888	0.255537	0.022202	0.954789	0.238264	0.536993
CL3837.Contig2_DB	black	0.776396	0.013878	-0.244546	0.52598	0.461899	0.210679	0.448646	0.225786	-0.389596	0.299981	0.0689546	0.860082	0.669231	0.0486746	0.357792	0.344459	0.418405	0.262392	0.00787437	0.983959	0.765806	0.016136	0.430142	0.247835	0.747072	0.0207068	0.127389	0.743968	0.364543	0.334762	0.380455	0.31245	-0.299837	0.433108	0.875685	0.00197093	0.27234	0.47835	0.100842	0.796299	0.0823814	0.83312	-0.729655	0.0256586	-0.0235854	0.951975	0.313332	0.411628
CL2060.Contig1_DB	black	0.460909	0.211788	-0.429239	0.248938	0.73727	0.0234073	0.582834	0.0995457	-0.136139	0.726908	0.00727572	0.985179	0.310357	0.416321	0.516694	0.154365	0.53503	0.137735	-0.576436	0.104229	0.589635	0.0947105	-0.0858834	0.826112	-0.0505319	0.897276	0.249147	0.51797	0.241535	0.531248	0.81909	0.00691347	0.172421	0.657332	0.461332	0.211315	-0.18434	0.634937	0.282577	0.461281	0.109592	0.778963	-0.116186	0.765955	-0.0279432	0.943112	-0.127083	0.744567
CL10539.Contig2_DB	black	0.822344	0.00650985	-0.162162	0.6768	0.451901	0.222023	0.416682	0.264566	-0.293472	0.443407	0.0300567	0.938815	0.46341	0.208994	0.291451	0.446699	0.326475	0.391188	-0.373632	0.321922	0.755953	0.0184456	0.51165	0.159133	0.473884	0.197516	-0.164539	0.672274	0.322313	0.397609	0.6373	0.0648662	-0.37608	0.318508	0.792467	0.0108719	-0.138522	0.722279	-0.083615	0.83065	-0.00215639	0.995607	-0.555001	0.120878	-0.349612	0.356389	0.273591	0.47625
CL19124.Contig1_DB	black	0.608394	0.0821294	-0.446038	0.228826	0.602261	0.0861215	0.735076	0.0240421	-0.0744974	0.848935	0.259425	0.500254	0.693468	0.038297	0.265342	0.490168	0.22117	0.5674	-0.390805	0.298352	0.938468	0.000179113	0.162967	0.675266	0.564904	0.113001	0.00176432	0.996406	0.372433	0.323602	0.460019	0.212788	0.140787	0.717886	0.554302	0.121446	-0.20494	0.596838	0.43228	0.24523	-0.140684	0.718087	-0.189453	0.625408	0.187469	0.629101	-0.073349	0.851243
CL14662.Contig1_DB	black	0.495843	0.174625	-0.583075	0.0993722	0.42367	0.255808	0.786829	0.0118707	-0.230477	0.550767	0.00735333	0.985021	0.606109	0.083603	0.508647	0.162013	0.129748	0.73936	-0.435813	0.240959	0.852528	0.00349984	-0.206714	0.593595	0.199439	0.606933	0.502274	0.168222	0.834837	0.00510922	0.508448	0.162205	0.378502	0.315147	0.420724	0.259481	0.0381968	0.922281	0.516313	0.154722	0.136845	0.725535	-0.161636	0.677804	0.203138	0.600138	-0.0142673	0.97094
CL4475.Contig3_DB	black	0.504073	0.166456	-0.48238	0.18847	0.685953	0.0413443	0.810873	0.00800755	0.0858778	0.826123	0.183634	0.636258	0.470358	0.201339	0.222728	0.564603	0.36411	0.335379	-0.658534	0.0537722	0.894255	0.00114006	0.0171183	0.965135	0.2435	0.527807	0.124779	0.749078	0.342418	0.367045	0.614632	0.0781884	0.301705	0.430106	0.477015	0.194155	-0.403696	0.281257	0.520496	0.150826	-0.0189394	0.961428	0.0180931	0.963151	0.109364	0.779415	-0.344567	0.363846
Unigene34043_DB	black	0.667388	0.0495301	-0.452117	0.221774	0.359263	0.342335	0.593415	0.0920866	-0.430424	0.24749	0.108089	0.781935	0.820577	0.00672695	0.626088	0.0712616	0.0563512	0.885506	-0.195273	0.614619	0.82287	0.00644614	0.0776585	0.842588	0.491148	0.179385	0.179623	0.643771	0.657095	0.0544829	0.4276	0.250949	0.0319739	0.934919	0.519248	0.151981	0.171248	0.659549	0.236351	0.540365	-0.182928	0.637579	-0.397577	0.289306	0.135269	0.728599	0.41451	0.267321
CL11248.Contig2_DB	black	0.734939	0.0240821	-0.275148	0.473643	0.451388	0.222614	0.584719	0.0981911	-0.16529	0.670847	0.106271	0.785534	0.555439	0.120523	0.180031	0.643006	0.273887	0.475753	-0.34956	0.356466	0.873589	0.00208528	0.388738	0.301141	0.578568	0.102654	-0.0291353	0.940688	0.411955	0.270581	0.463766	0.208598	-0.142647	0.714285	0.727602	0.0262888	-0.139454	0.720471	0.182345	0.638668	0.00759994	0.984518	-0.423292	0.256277	-0.110742	0.776691	0.0681351	0.861732
CL3801.Contig1_DB	black	0.764817	0.0163586	-0.254359	0.508954	0.396549	0.290671	0.526465	0.145365	-0.26682	0.487662	0.00728257	0.985165	0.470014	0.201715	0.423819	0.255622	0.292537	0.444928	-0.526893	0.144978	0.812492	0.00778329	0.334821	0.378459	0.263757	0.492862	0.0302779	0.938365	0.512732	0.158103	0.701595	0.0351693	-0.198305	0.609023	0.706161	0.0334874	-0.164099	0.673111	0.0463691	0.905707	-0.0263564	0.946338	-0.4236	0.255894	-0.323367	0.395979	0.245949	0.523531
CL18135.Contig1_DB	black	0.575081	0.105237	-0.438461	0.237785	0.413316	0.268841	0.661602	0.0522772	-0.172706	0.656794	0.0289867	0.94099	0.484692	0.18605	0.329201	0.387009	-0.00487808	0.990063	-0.594233	0.0915248	0.798023	0.00994458	0.0149719	0.969505	0.200517	0.604951	0.028249	0.94249	0.62835	0.0699406	0.587763	0.0960268	0.172435	0.657305	0.364829	0.334355	-0.293239	0.443785	0.244941	0.525289	-0.0192983	0.960698	-0.0859599	0.825959	-0.0510659	0.896195	0.0187474	0.961819
CL13896.Contig2_DB	black	0.553808	0.121848	-0.379955	0.313138	0.649197	0.0584887	0.66177	0.0521961	0.0364935	0.925739	0.162023	0.677064	0.39945	0.28683	0.186837	0.630278	0.239242	0.535272	-0.706825	0.0332469	0.78183	0.0128063	0.137812	0.723657	0.214735	0.579008	-0.196196	0.612912	0.204454	0.597726	0.665432	0.0504479	0.129238	0.740355	0.399537	0.286716	-0.548844	0.125936	0.260041	0.499199	-0.148022	0.703905	0.03874	0.921178	-0.0693971	0.859192	-0.207901	0.591428
CL19257.Contig1_DB	black	0.491823	0.178696	-0.514211	0.156702	0.416325	0.265018	0.587609	0.0961354	-0.322497	0.397324	-0.189022	0.62621	0.442879	0.232538	0.821412	0.00662381	0.451416	0.222581	-0.627007	0.0707229	0.466366	0.205718	-0.263778	0.492826	-0.2816	0.462899	0.437894	0.238463	0.386707	0.303893	0.586267	0.0970866	0.235811	0.541317	0.211081	0.585637	-0.0409988	0.916595	0.132142	0.73469	-0.29988	0.433039	0.0533624	0.891549	-0.0891823	0.819519	0.225687	0.559304
CL9892.Contig1_DB	black	0.393154	0.295198	-0.627129	0.0706515	0.484062	0.186708	0.81806	0.00704457	-0.14484	0.710044	-0.0516871	0.894938	0.512779	0.158059	0.585605	0.0975577	0.380055	0.313001	-0.529844	0.142325	0.733624	0.0244682	-0.353909	0.350098	-0.0368778	0.924958	0.685633	0.0414775	0.664238	0.0510138	0.497389	0.173073	0.501394	0.16909	0.330605	0.384865	0.0226191	0.95394	0.578067	0.103023	0.0637605	0.870548	0.01236	0.974824	0.226422	0.557991	-0.14079	0.717881
Unigene33386_DB	black	0.545775	0.128503	-0.512474	0.158349	0.467206	0.204793	0.755426	0.0185751	-0.205877	0.595124	0.130375	0.738136	0.65945	0.0533229	0.504722	0.165821	0.167852	0.665982	-0.39739	0.289555	0.92987	0.000280677	-0.0545074	0.889233	0.315889	0.407614	0.391617	0.297259	0.758194	0.0179022	0.569506	0.109449	0.25846	0.501906	0.54926	0.125591	0.0205316	0.958188	0.51461	0.156325	0.0825546	0.832773	-0.268631	0.484599	0.18133	0.64057	0.0339346	0.930935
CL5580.Contig1_DB	black	0.31719	0.405578	-0.681142	0.0433749	0.514582	0.156351	0.846788	0.00397683	-0.133293	0.732446	0.00318166	0.993518	0.589597	0.0947376	0.433768	0.243427	0.273707	0.476056	-0.294062	0.442448	0.749408	0.0200952	-0.410029	0.27305	0.215189	0.578186	0.724035	0.0274082	0.700591	0.0355466	0.304739	0.425249	0.60467	0.0845395	0.311646	0.414286	0.161326	0.678394	0.721642	0.0281763	0.219341	0.570692	-0.0311518	0.936589	0.481537	0.189357	-0.258869	0.501207
CL15017.Contig1_DB	black	0.489655	0.180914	-0.552677	0.122773	0.599038	0.0882665	0.773928	0.014384	-0.110288	0.777587	0.23987	0.534168	0.82639	0.00603081	0.36627	0.332303	0.409058	0.274301	-0.112846	0.772538	0.838467	0.00474467	-0.0246268	0.949856	0.645429	0.0604634	0.348145	0.358551	0.291266	0.447002	0.158199	0.684366	0.302658	0.428577	0.498094	0.172368	0.135744	0.727675	0.605759	0.08383	-0.186535	0.630841	-0.175884	0.650801	0.496634	0.17383	-0.092427	0.813045
Unigene38034_DB	black	0.522838	0.148669	-0.344654	0.363717	0.714363	0.0305988	0.633937	0.0667451	0.0352656	0.928232	0.243933	0.52705	0.447239	0.227423	-0.0138673	0.971754	0.250759	0.515174	-0.34802	0.358735	0.837668	0.00482333	0.228829	0.553698	0.589527	0.0947866	-0.110189	0.777785	0.239863	0.534181	0.526016	0.145771	0.0890079	0.819867	0.602374	0.086047	-0.29391	0.442695	0.406388	0.277753	0.200604	0.604791	-0.240098	0.533768	0.142645	0.714288	-0.324121	0.394813
CL26715.Contig1_DB	black	0.28689	0.454169	-0.705592	0.0336939	0.536574	0.136385	0.886294	0.00145801	-0.0499169	0.898521	0.0215882	0.956038	0.537971	0.13517	0.430107	0.247877	0.214979	0.578567	-0.497473	0.172989	0.748875	0.0202337	-0.464498	0.207785	0.0613952	0.875319	0.607116	0.0829514	0.65469	0.0556836	0.386169	0.304624	0.680543	0.0436321	0.180884	0.641406	-0.0602163	0.877699	0.714105	0.0306873	0.0896872	0.818511	0.167632	0.666399	0.429377	0.24877	-0.325703	0.392375
CL9671.Contig3_DB	black	-0.506222	0.16436	0.344565	0.363849	-0.680375	0.0437044	-0.620693	0.0744734	-0.11244	0.773338	-0.0918898	0.814116	-0.240768	0.532592	-0.10337	0.791283	-0.334455	0.379013	0.804037	0.00900263	-0.6616	0.052278	-0.123162	0.752246	-0.0735625	0.850814	0.242358	0.529804	-0.0439914	0.910526	-0.67715	0.0451074	-0.130387	0.738111	-0.327952	0.388921	0.67031	0.0481785	-0.188659	0.626885	0.140889	0.717688	-0.154208	0.692009	0.159725	0.68145	0.32336	0.395989
CL4726.Contig1_DB	black	0.665614	0.0503621	-0.301923	0.429755	0.445235	0.229766	0.577525	0.103422	-0.18579	0.632231	0.129719	0.739416	0.589565	0.0947594	0.124389	0.749842	0.187551	0.628947	-0.176212	0.650184	0.864129	0.00265869	0.327319	0.389892	0.700469	0.0355923	0.0428923	0.912754	0.485017	0.185711	0.365637	0.333204	-0.0777622	0.84238	0.716633	0.0298295	-0.00149806	0.996948	0.272995	0.47725	0.151923	0.696395	-0.482383	0.188467	0.0483404	0.901713	0.0267575	0.945523
Unigene32196_DB	black	0.408383	0.275171	-0.598326	0.0887447	0.362273	0.338008	0.780984	0.0129694	-0.182437	0.638496	-0.133261	0.732508	0.450803	0.223288	0.522353	0.149113	0.218499	0.572208	-0.564387	0.113405	0.70786	0.0328749	-0.345705	0.362158	-0.0733001	0.851341	0.632973	0.0672898	0.792961	0.0107872	0.477772	0.193346	0.47354	0.197887	0.277117	0.470352	-0.0145799	0.970303	0.484523	0.186226	0.124074	0.750458	0.0150829	0.969279	0.127889	0.742991	-0.0960172	0.805892
CL8584.Contig2_DB	black	0.287763	0.452735	-0.71464	0.0305043	0.431884	0.245711	0.877018	0.00190054	-0.105685	0.786693	-0.0591939	0.879763	0.557521	0.118843	0.426487	0.25232	0.205062	0.596614	-0.4062	0.277997	0.708974	0.0324776	-0.49266	0.177844	0.0914459	0.815001	0.721535	0.0282108	0.725526	0.0269367	0.243523	0.527766	0.686357	0.0411768	0.166278	0.668969	0.0687452	0.860504	0.697482	0.0367306	0.113462	0.771323	0.133346	0.732342	0.449282	0.225048	-0.274827	0.474179
CL10810.Contig1_DB	black	0.593459	0.0920565	-0.395434	0.292154	0.594984	0.0910108	0.723759	0.0274961	-0.0145375	0.97039	0.280159	0.465289	0.630162	0.0688941	0.213308	0.581593	0.266627	0.48799	-0.413031	0.269205	0.960795	3.78048e-05	0.212531	0.583003	0.542199	0.131533	0.0239475	0.951238	0.374139	0.321214	0.501161	0.16932	0.111667	0.774865	0.620311	0.0747045	-0.231329	0.549254	0.460137	0.212654	-0.0675354	0.86294	-0.223819	0.562648	0.140118	0.719183	-0.1305	0.737892
CL23310.Contig1_DB	black	0.474197	0.197178	-0.543926	0.130064	0.429136	0.249065	0.78209	0.0127564	-0.0724257	0.853099	0.0930435	0.811815	0.568624	0.110125	0.292824	0.444461	-0.0110267	0.977539	-0.570461	0.108721	0.836635	0.00492633	-0.128296	0.742196	0.238633	0.536343	0.138669	0.721993	0.617958	0.0761363	0.426752	0.251993	0.383634	0.308084	0.252277	0.512549	-0.287158	0.453728	0.448184	0.226323	-0.100597	0.796786	0.0786143	0.840671	0.171157	0.659722	-0.128521	0.741756
Unigene33695_DB	black	0.437771	0.238609	-0.602838	0.0857412	0.338881	0.372338	0.718123	0.0293313	-0.364449	0.334896	-0.0160943	0.96722	0.72986	0.0255961	0.580028	0.101584	0.144723	0.71027	-0.0776133	0.842679	0.75742	0.0180887	-0.273881	0.475763	0.371067	0.32552	0.71482	0.030443	0.864301	0.0026474	0.255592	0.506832	0.38467	0.306667	0.430256	0.247695	0.418105	0.26277	0.558224	0.118279	0.18811	0.627907	-0.31565	0.407989	0.412475	0.269916	0.115371	0.767559
Unigene40821_DB	black	0.625727	0.0714737	-0.385927	0.304955	0.494911	0.175564	0.678831	0.0443725	-0.157212	0.686254	0.234925	0.542883	0.671973	0.04742	0.353879	0.350142	0.188378	0.627408	-0.329415	0.386681	0.97297	1.04123e-05	0.198582	0.608512	0.52677	0.145089	0.145295	0.709165	0.586479	0.0969362	0.549439	0.125442	0.0577867	0.882605	0.682935	0.0426108	-0.0535422	0.891185	0.425645	0.25336	0.0270143	0.945	-0.384674	0.306662	0.1077	0.782704	0.0532901	0.891695
CL3605.Contig2_DB	black	0.290447	0.448339	-0.642091	0.0622478	0.615999	0.0773406	0.74185	0.0221182	-0.154084	0.692247	0.201517	0.603114	0.649243	0.0584649	0.391976	0.296777	-0.0536658	0.890935	-0.23746	0.538409	0.758145	0.0179141	-0.345736	0.362112	0.36433	0.335066	0.294049	0.442469	0.624248	0.0723468	0.435733	0.241055	0.543174	0.130703	0.219218	0.570912	0.0131484	0.973218	0.650362	0.0578861	0.154402	0.691637	-0.0289441	0.941077	0.554227	0.121507	-0.184649	0.63436
CL9885.Contig3_DB	black	0.730246	0.025479	-0.22996	0.551685	0.477511	0.193625	0.422389	0.257401	-0.350465	0.355137	0.202129	0.60199	0.728534	0.0260014	0.368894	0.328585	0.31103	0.415257	0.0265013	0.946043	0.780691	0.0130262	0.441347	0.23435	0.788252	0.0116129	-0.0192696	0.960756	0.294208	0.442211	0.388203	0.301864	-0.290769	0.447814	0.811328	0.00794412	0.207171	0.59276	0.126192	0.746311	-0.0543883	0.889474	-0.673051	0.0469322	0.0481549	0.902089	0.342358	0.367134
CL8916.Contig1_DB	black	0.515314	0.155661	-0.548262	0.12642	0.48309	0.187725	0.808001	0.00841594	-0.130575	0.737745	0.2219	0.56609	0.826307	0.00604034	0.470711	0.200955	0.345202	0.362904	-0.226124	0.558523	0.922844	0.000389308	-0.0400318	0.918557	0.514578	0.156355	0.451552	0.222424	0.510478	0.160254	0.256945	0.504506	0.309479	0.417712	0.529901	0.142275	0.128322	0.742146	0.627381	0.0705046	-0.181203	0.640809	-0.197189	0.61108	0.397393	0.289551	-0.00668883	0.986374
CL19667.Contig2_DB	black	0.593515	0.0920181	-0.391982	0.296769	0.504798	0.165748	0.73735	0.0233845	-0.0316938	0.935488	0.206327	0.594301	0.572656	0.107058	0.262095	0.495693	0.257221	0.504031	-0.488065	0.182551	0.973243	1.00506e-05	0.172704	0.656799	0.408959	0.274429	0.155153	0.690197	0.532172	0.140254	0.553085	0.122438	0.128741	0.741326	0.634307	0.0665368	-0.211858	0.584226	0.462999	0.209451	0.0106287	0.978349	-0.237359	0.538586	0.05304	0.892201	-0.107276	0.783543
CL15992.Contig1_DB	black	0.489437	0.181138	-0.514352	0.156568	0.393668	0.29451	0.747511	0.0205909	-0.170025	0.661864	0.110016	0.778125	0.718791	0.0291095	0.249015	0.518198	0.170488	0.660988	-0.0919411	0.814014	0.862829	0.00274516	-0.0343416	0.930109	0.626649	0.0709324	0.447696	0.226891	0.657013	0.0545236	0.143244	0.713129	0.29445	0.441818	0.521618	0.14979	0.202519	0.601273	0.57808	0.103013	0.131044	0.736831	-0.292758	0.444569	0.394663	0.29318	-0.0786478	0.840604
CL23573.Contig1_DB	black	0.366326	0.332224	-0.607258	0.08286	0.464229	0.208084	0.682167	0.0429372	-0.297101	0.437521	0.00352095	0.992827	0.58859	0.0954443	0.773446	0.0144843	0.212937	0.582266	-0.406042	0.278203	0.643558	0.0614597	-0.387206	0.303216	-0.0449456	0.908592	0.570609	0.108608	0.667025	0.0496993	0.56618	0.11201	0.433715	0.243491	0.251759	0.513443	0.128207	0.742371	0.468922	0.202909	-0.028458	0.942065	-0.0531536	0.891971	0.264882	0.490949	0.106846	0.784396
CL15098.Contig1_DB	black	0.720155	0.0286607	-0.286805	0.454309	0.423394	0.25615	0.535097	0.137676	-0.299928	0.432961	0.202668	0.600999	0.764638	0.0163991	0.43077	0.247067	0.3472	0.359945	-0.0749145	0.848097	0.874836	0.00201671	0.368739	0.328804	0.698268	0.0364287	0.153358	0.693641	0.424036	0.255353	0.384542	0.306842	-0.181231	0.640755	0.81254	0.00777666	0.19928	0.607225	0.253997	0.509578	-0.0958403	0.806244	-0.604766	0.0844766	0.067067	0.863883	0.303811	0.426731
CL9056.Contig1_DB	black	0.369382	0.327896	-0.593974	0.0917026	0.50787	0.162763	0.840188	0.00457812	-0.0183406	0.962647	0.177374	0.647997	0.606779	0.0831692	0.254771	0.508244	0.043219	0.912092	-0.40446	0.28026	0.893009	0.0011863	-0.214593	0.579266	0.351303	0.353907	0.344418	0.364067	0.679008	0.0442957	0.38083	0.311933	0.511103	0.159656	0.325506	0.392678	-0.123662	0.751266	0.68854	0.0402783	0.110598	0.776976	0.00342501	0.993023	0.401652	0.283933	-0.282697	0.461082
CL22960.Contig1_DB	black	0.449692	0.224573	-0.50014	0.170331	0.396	0.2914	0.686757	0.0410111	-0.170808	0.660382	0.0958055	0.806313	0.721046	0.0283698	0.120827	0.756829	0.156618	0.687391	0.0695676	0.858848	0.753649	0.0190156	-0.0228074	0.953557	0.76766	0.0157242	0.370252	0.326668	0.50357	0.166949	-0.0525791	0.893133	0.28178	0.4626	0.453873	0.219759	0.259388	0.500317	0.532628	0.13985	0.118279	0.761836	-0.276871	0.470762	0.488288	0.18232	-0.114874	0.768539
Unigene2326_DB	black	0.715244	0.0302986	-0.210642	0.586436	0.40076	0.285105	0.496317	0.174148	-0.178994	0.644953	0.144515	0.710671	0.542324	0.131427	0.150949	0.698268	0.1703	0.661344	-0.289696	0.449568	0.832437	0.00536055	0.442533	0.232947	0.612156	0.0797382	-0.146204	0.707411	0.386065	0.304766	0.451304	0.22271	-0.213527	0.581196	0.704224	0.0341943	-0.143526	0.712583	0.115056	0.76818	-0.0145283	0.970408	-0.454458	0.219091	-0.132196	0.734583	0.136403	0.726394
CL5115.Contig1_DB	black	0.401237	0.284477	-0.555856	0.120186	0.528996	0.143085	0.764424	0.0164477	-0.153977	0.692453	0.165656	0.670151	0.670147	0.0482533	0.468945	0.202883	0.291528	0.446574	-0.191868	0.620923	0.859671	0.00296323	-0.175561	0.65141	0.385511	0.305521	0.598753	0.0884578	0.670788	0.0479596	0.414028	0.267934	0.387517	0.302794	0.534377	0.138308	0.209758	0.588044	0.692577	0.0386507	0.1955	0.614199	-0.26966	0.482862	0.423558	0.255946	-0.111051	0.776082
CL14589.Contig1_DB	black	0.740403	0.0225204	-0.166245	0.669033	0.465687	0.206467	0.527688	0.144261	-0.0845398	0.828799	0.116568	0.765202	0.421	0.259136	0.220379	0.568824	0.474625	0.196717	-0.48556	0.185146	0.851755	0.00356169	0.488725	0.18187	0.395426	0.292164	-0.0193933	0.960505	0.292793	0.444511	0.626671	0.0709195	-0.255099	0.507679	0.829723	0.00565466	-0.23383	0.544819	0.130801	0.737304	-0.0160818	0.967245	-0.442327	0.23319	-0.302576	0.428708	0.0559315	0.886354
CL326.Contig1_DB	black	0.60089	0.0870301	-0.252922	0.511434	0.477022	0.194147	0.448833	0.225569	-0.298151	0.435825	0.101695	0.794605	0.552336	0.123052	0.236817	0.539542	0.335602	0.377277	0.08564	0.826598	0.747457	0.0206052	0.300768	0.43161	0.714414	0.0305814	0.26593	0.48917	0.481385	0.189517	0.392379	0.296235	-0.1512	0.697786	0.846986	0.00395964	0.322344	0.39756	0.283789	0.459278	0.395935	0.291486	-0.727117	0.0264392	0.116099	0.766126	0.102344	0.793318
Unigene18572_DB	black	0.320825	0.399916	-0.626464	0.071041	0.520253	0.15105	0.828235	0.00582054	-0.0704258	0.857121	0.121483	0.755539	0.575903	0.104625	0.498918	0.171546	0.204432	0.597767	-0.457462	0.215674	0.81469	0.00748567	-0.347555	0.359421	0.103436	0.791152	0.561634	0.115567	0.683261	0.042473	0.4932	0.177295	0.558646	0.117942	0.305864	0.423454	-0.0247656	0.949574	0.702762	0.0347345	0.0791522	0.839592	0.0249513	0.949196	0.378402	0.315285	-0.208623	0.590111
CL25452.Contig1_DB	black	0.611481	0.0801639	-0.406437	0.27769	0.444552	0.230568	0.714011	0.0307194	-0.141868	0.715792	0.248024	0.51992	0.738389	0.023088	0.450983	0.22308	0.295074	0.440804	-0.322623	0.397129	0.979359	4.07738e-06	0.165007	0.671385	0.484092	0.186676	0.277615	0.469521	0.558558	0.118013	0.467629	0.204327	0.0943925	0.809127	0.676203	0.045525	0.0140271	0.971429	0.482874	0.187951	-0.122302	0.753932	-0.343942	0.364775	0.147779	0.704372	0.0962895	0.80535
CL5882.Contig2_DB	black	0.517153	0.153935	-0.434719	0.242277	0.52869	0.14336	0.725631	0.0269036	-0.0634563	0.871161	0.281646	0.462822	0.722717	0.0278293	0.213375	0.581472	0.265135	0.49052	-0.143824	0.712007	0.938796	0.000175848	0.129102	0.74062	0.692024	0.0388707	0.252196	0.512688	0.45925	0.213653	0.283886	0.459117	0.187685	0.628698	0.635516	0.0658587	0.0548221	0.888597	0.590874	0.0938455	0.0400309	0.918558	-0.322478	0.397353	0.355909	0.347188	-0.123177	0.752216
CL14780.Contig2_DB	black	0.523976	0.147627	-0.380162	0.312853	0.481946	0.188926	0.752609	0.0192767	0.108534	0.781056	0.0853302	0.827218	0.3519	0.353033	0.162984	0.675235	0.346552	0.360904	-0.740223	0.0225707	0.858728	0.0030306	0.0965974	0.804737	0.120234	0.757993	0.154032	0.692348	0.419922	0.260486	0.569969	0.109096	0.20921	0.589041	0.486941	0.183712	-0.445103	0.229922	0.4116	0.271034	-0.0221391	0.954917	0.0132618	0.972987	-0.0982039	0.801542	-0.290925	0.447558
CL7154.Contig1_DB	black	0.573024	0.10678	-0.403318	0.281751	0.369353	0.327936	0.650979	0.057569	-0.211024	0.58574	0.17135	0.659357	0.728567	0.0259913	0.257518	0.503522	0.128255	0.742277	-0.0717935	0.85437	0.894998	0.00111313	0.149778	0.700521	0.698648	0.0362835	0.272923	0.477372	0.629913	0.0690376	0.237477	0.538378	0.098247	0.801456	0.633403	0.0670466	0.17512	0.652241	0.453248	0.220475	0.0917934	0.814308	-0.434534	0.2425	0.26369	0.492976	0.0660052	0.866023
CL16159.Contig2_DB	black	0.688106	0.0404559	-0.242986	0.528705	0.506572	0.16402	0.538281	0.134902	-0.178271	0.64631	0.248533	0.519036	0.673186	0.0468716	0.329856	0.386008	0.465008	0.20722	-0.132208	0.73456	0.880711	0.00171463	0.420879	0.259287	0.675732	0.0457334	0.119783	0.75888	0.295991	0.439318	0.438937	0.237216	-0.190023	0.624348	0.863704	0.00268674	0.0957768	0.80637	0.297895	0.436238	-0.046169	0.906112	-0.576864	0.103912	0.0399123	0.918799	0.151187	0.69781
CL7246.Contig5_DB	black	0.544258	0.129784	-0.373169	0.322571	0.44083	0.234964	0.719343	0.0289275	0.0374084	0.923881	0.143309	0.713004	0.458118	0.214931	0.110758	0.77666	0.16287	0.675452	-0.565611	0.112451	0.898611	0.000988329	0.146908	0.706052	0.340409	0.370046	0.0638829	0.870301	0.502379	0.168119	0.478854	0.192195	0.168505	0.664744	0.503813	0.166711	-0.347849	0.358987	0.407736	0.276008	0.0158389	0.96774	-0.0976915	0.802561	-0.00118605	0.997584	-0.206102	0.594712
CL2985.Contig2_DB	black	0.45938	0.213506	-0.538522	0.134693	0.381253	0.31135	0.808572	0.00833375	-0.106279	0.785517	0.0656119	0.866815	0.604683	0.0845312	0.50952	0.161173	0.318345	0.403776	-0.464434	0.207856	0.866833	0.00248494	-0.162384	0.676378	0.149523	0.701012	0.599411	0.0880166	0.70516	0.0338513	0.42649	0.252317	0.379087	0.314337	0.459878	0.212946	0.0253024	0.948482	0.594693	0.0912096	-0.0168781	0.965624	-0.10397	0.790092	0.198422	0.608806	-0.063999	0.870067
CL12951.Contig1_DB	black	0.226309	0.558193	-0.644454	0.0609815	0.480797	0.190137	0.749404	0.0200961	-0.159295	0.682271	-0.0293332	0.940286	0.463651	0.208726	0.483536	0.187257	0.172258	0.657641	-0.321554	0.398786	0.641725	0.0624454	-0.49177	0.17875	0.033566	0.931684	0.716635	0.0298287	0.753587	0.0190312	0.425003	0.254154	0.613683	0.0787802	0.226552	0.55776	0.149517	0.701025	0.66641	0.0499877	0.324204	0.394685	-0.0123685	0.974806	0.425131	0.253996	-0.231316	0.549276
CL4285.Contig2_DB	black	0.679769	0.0439657	-0.279823	0.465847	0.421997	0.257891	0.435437	0.241412	-0.379733	0.313445	0.228425	0.554417	0.830801	0.00553658	0.468371	0.203512	0.283099	0.460418	0.103835	0.790361	0.754659	0.0187643	0.348873	0.357477	0.790477	0.0112176	0.0620757	0.873946	0.298074	0.43595	0.269572	0.48301	-0.213722	0.580843	0.721752	0.0281405	0.307363	0.421069	0.179578	0.643856	-0.196207	0.612892	-0.615086	0.077906	0.171261	0.659526	0.416047	0.26537
CL4672.Contig1_DB	black	0.499952	0.170518	-0.499664	0.170804	0.450826	0.223262	0.716014	0.030038	-0.232658	0.546895	0.218126	0.57288	0.792346	0.0108927	0.574111	0.105963	0.278389	0.468232	-0.140274	0.718881	0.90565	0.000773758	-0.0410812	0.916428	0.472555	0.198951	0.520284	0.151021	0.661636	0.0522605	0.39618	0.291161	0.238158	0.537179	0.609884	0.0811773	0.266147	0.488803	0.599697	0.0878256	0.00418163	0.991481	-0.37494	0.320095	0.359152	0.342495	0.112917	0.772397
CL13105.Contig2_DB	black	0.623929	0.0725366	-0.296545	0.438421	0.522994	0.148526	0.640279	0.0632304	-0.0132563	0.972999	0.287284	0.453521	0.569194	0.109688	0.258952	0.501064	0.267271	0.4869	-0.496529	0.173936	0.938356	0.000180237	0.312524	0.4129	0.434818	0.242158	-0.0679955	0.862013	0.342606	0.366765	0.595847	0.090422	-0.0166899	0.966007	0.647467	0.0593901	-0.307091	0.421501	0.341625	0.368228	-0.156318	0.687965	-0.246148	0.523184	-0.0338876	0.931031	-0.0211026	0.957026
CL3088.Contig2_DB	black	0.330024	0.385751	-0.640036	0.0633626	0.250919	0.514897	0.729594	0.025677	-0.294324	0.442022	-0.115918	0.766482	0.580536	0.101213	0.669103	0.0487338	0.0981011	0.801746	-0.365169	0.333869	0.630172	0.0688881	-0.469229	0.202573	-0.0402844	0.918044	0.735298	0.0239773	0.857193	0.00314247	0.319644	0.401752	0.533909	0.13872	0.160419	0.680124	0.208048	0.59116	0.508508	0.162147	0.0197383	0.959802	0.00701378	0.985712	0.296398	0.438659	0.0774748	0.842957
CL4788.Contig2_DB	black	0.683088	0.0425461	-0.29516	0.440665	0.305743	0.423647	0.56446	0.113348	-0.254328	0.509009	0.148197	0.703566	0.651656	0.0572219	0.426074	0.25283	0.1426	0.714375	-0.321341	0.399115	0.891626	0.00123909	0.280786	0.464248	0.453598	0.220075	0.112353	0.773511	0.616519	0.0770196	0.501274	0.169209	-0.0950082	0.807901	0.670726	0.0479878	-0.00430654	0.991227	0.229924	0.551749	-0.0930515	0.811799	-0.440714	0.235101	-0.0696649	0.858653	0.280404	0.464882
CL17524.Contig2_DB	black	0.326147	0.391692	-0.60122	0.086811	0.405381	0.279062	0.778634	0.0134297	-0.137012	0.725212	0.0135712	0.972357	0.520561	0.150765	0.579126	0.102244	0.213516	0.581217	-0.480201	0.190767	0.741857	0.0221162	-0.376082	0.318504	-0.032838	0.933163	0.65824	0.0539166	0.757978	0.0179541	0.490928	0.179609	0.523038	0.148485	0.283498	0.459758	0.038061	0.922556	0.614728	0.0781289	0.0833957	0.831089	0.00774797	0.984217	0.271505	0.479753	-0.105264	0.787529
CL29181.Contig1_DB	black	0.672407	0.0472234	-0.230235	0.551197	0.412028	0.270487	0.500789	0.169689	-0.232417	0.547322	0.187373	0.62928	0.663315	0.0514537	0.277354	0.469958	0.387249	0.303158	-0.0124622	0.974616	0.842872	0.00432664	0.408498	0.275023	0.737063	0.0234667	0.187133	0.629726	0.396664	0.290518	0.330485	0.385047	-0.19889	0.607943	0.861108	0.00286259	0.217126	0.574685	0.280617	0.464529	0.0694645	0.859056	-0.649631	0.0582638	0.063645	0.87078	0.181478	0.640293
CL11188.Contig1_DB	black	0.527006	0.144875	-0.360484	0.340577	0.591935	0.0931088	0.726208	0.0267226	0.0867493	0.82438	0.223815	0.562656	0.485402	0.18531	0.342204	0.367364	0.590873	0.0938462	-0.579404	0.10204	0.88281	0.00161473	0.15467	0.691124	0.212146	0.583702	0.257777	0.503077	0.253432	0.510553	0.594609	0.0912671	0.137689	0.723896	0.642298	0.0621365	-0.258377	0.502049	0.494505	0.175973	-0.131073	0.736774	-0.129657	0.739537	0.0156127	0.968201	-0.196734	0.611918
CL21826.Contig1_DB	black	0.643935	0.0612579	-0.344844	0.363435	0.360742	0.340205	0.635678	0.0657684	-0.184946	0.633806	0.224867	0.560772	0.777768	0.013602	0.369626	0.327551	0.303174	0.427751	-0.150129	0.699845	0.916552	0.000509001	0.269636	0.482903	0.649163	0.0585063	0.229618	0.552295	0.467979	0.203943	0.267908	0.485821	-0.01767	0.964012	0.701253	0.0352976	0.124208	0.750196	0.390391	0.298908	-0.176595	0.649462	-0.42748	0.251097	0.154215	0.691997	0.178776	0.645361
CL17719.Contig1_DB	black	0.483885	0.186892	-0.42814	0.250286	0.448178	0.22633	0.643715	0.0613758	-0.140702	0.718052	0.209061	0.589312	0.773459	0.0144816	0.189971	0.624446	0.314505	0.409785	0.101561	0.794871	0.781067	0.0129532	0.10896	0.780213	0.814335	0.00753325	0.318061	0.404218	0.331622	0.383314	-0.00679732	0.986153	0.160535	0.679904	0.570678	0.108555	0.269655	0.48287	0.52296	0.148557	-0.0278792	0.943242	-0.351092	0.354217	0.462359	0.210166	-0.0447126	0.909064
Unigene34310_DB	black	0.356875	0.345787	-0.498688	0.171776	0.520073	0.151217	0.801656	0.009368	0.125104	0.748442	0.0844527	0.828974	0.333544	0.380393	0.287734	0.452782	0.28954	0.449823	-0.776411	0.013875	0.78896	0.0114862	-0.184239	0.635126	-0.0800532	0.837785	0.315591	0.408081	0.485991	0.184698	0.606278	0.0834937	0.452544	0.221283	0.294347	0.441985	-0.418607	0.262137	0.556355	0.119782	0.00344492	0.992982	0.189769	0.624821	0.0690005	0.85999	-0.373691	0.32184
CL24249.Contig1_DB	black	0.555676	0.120331	-0.45598	0.217355	0.392474	0.296109	0.744491	0.0213968	-0.101916	0.794167	0.206718	0.593587	0.786766	0.0118821	0.51101	0.159745	0.448888	0.225505	-0.31395	0.410656	0.874217	0.00205058	0.068064	0.861875	0.408351	0.275213	0.390898	0.298225	0.378097	0.315707	0.244792	0.525549	0.185577	0.632628	0.536949	0.136058	0.0548204	0.8886	0.501052	0.169429	-0.393977	0.294097	-0.161004	0.679008	0.227297	0.556429	0.0942283	0.809454
CL21780.Contig1_DB	black	0.412888	0.269388	-0.437864	0.238498	0.224865	0.560776	0.537999	0.135146	-0.346028	0.36168	-0.231535	0.548888	0.316735	0.40629	0.570244	0.108886	0.139476	0.720428	-0.408302	0.275276	0.550654	0.124437	-0.250298	0.515972	-0.129358	0.740122	0.619209	0.075373	0.874245	0.00204905	0.557105	0.119178	0.241609	0.531117	0.355711	0.347476	0.16285	0.675489	0.257003	0.504406	0.330232	0.385433	-0.237975	0.537502	-0.0559579	0.8863	0.129289	0.740257
CL20624.Contig2_DB	black	0.363284	0.336561	-0.576415	0.104244	0.448356	0.226122	0.767168	0.0158328	-0.0658332	0.866369	0.273354	0.476647	0.787318	0.0117816	0.219957	0.569582	-0.0560024	0.886211	-0.152815	0.694683	0.836041	0.00498621	-0.149503	0.701051	0.618385	0.0758749	0.184996	0.633712	0.509273	0.16141	0.0978209	0.802303	0.454131	0.219465	0.24517	0.52489	-0.0100896	0.979447	0.638604	0.0641467	-0.141409	0.716681	-0.00249835	0.99491	0.568378	0.110314	-0.143372	0.712882
Unigene3471_DB	black	-0.528964	0.143114	0.374733	0.320384	-0.286172	0.455349	-0.585172	0.0978671	0.25571	0.506628	-0.0109025	0.977792	-0.639368	0.0637278	-0.273551	0.476317	-0.34111	0.368998	-0.0589167	0.880323	-0.732711	0.0247388	-0.102258	0.793488	-0.623357	0.0728767	-0.536065	0.136829	-0.57659	0.104114	-0.0796324	0.838629	-0.0762799	0.845355	-0.656935	0.0545623	-0.395001	0.292731	-0.412854	0.269431	-0.18936	0.62558	0.496864	0.173599	-0.24477	0.525588	-0.0716694	0.85462
CL4692.Contig16_DB	black	-0.536842	0.136151	0.262285	0.495368	-0.521524	0.149876	-0.623143	0.0730042	-0.0976658	0.802612	-0.0931914	0.811521	-0.218288	0.572589	-0.208927	0.589556	-0.403852	0.281053	0.803377	0.00910295	-0.795373	0.0103799	-0.198873	0.607976	0.00763374	0.984449	-0.0443756	0.909747	-0.335859	0.37689	-0.789557	0.01138	-0.0493335	0.899702	-0.564628	0.113217	0.51183	0.158962	-0.277489	0.469732	-0.0360411	0.926657	0.0750081	0.847909	0.283362	0.459982	0.227842	0.555457
Unigene40207_DB	black	0.577504	0.103438	-0.28183	0.462518	0.43069	0.247165	0.636234	0.065458	0.0365995	0.925523	0.148224	0.703515	0.375116	0.31985	0.179041	0.644864	0.206306	0.59434	-0.676824	0.0452511	0.867862	0.00242091	0.237421	0.538477	0.201746	0.602693	-0.0345869	0.92961	0.439787	0.236203	0.642443	0.0620584	0.0394969	0.919642	0.544204	0.129829	-0.442904	0.232509	0.284665	0.457831	-0.0449553	0.908572	-0.121961	0.754603	-0.186407	0.631079	-0.117555	0.76326
CL4742.Contig3_DB	black	0.45631	0.21698	-0.319572	0.401864	0.604466	0.084673	0.705951	0.0335634	0.218334	0.572506	0.146781	0.706297	0.236598	0.539928	0.0864262	0.825026	0.487403	0.183234	-0.749933	0.0199593	0.8102	0.00810205	0.136024	0.727131	0.0822868	0.83331	0.110239	0.777685	0.23087	0.550068	0.654989	0.0555334	0.1851	0.633518	0.533112	0.139422	-0.515859	0.155148	0.442445	0.233051	0.0546459	0.888953	0.0200524	0.959163	-0.104448	0.789146	-0.436967	0.239572
CL23618.Contig1_DB	black	0.273154	0.476984	-0.563324	0.114237	0.589408	0.0948694	0.810649	0.00803882	0.118666	0.761074	0.144469	0.71076	0.411903	0.270647	0.38601	0.304842	0.33135	0.383729	-0.683724	0.0422774	0.738073	0.023178	-0.301984	0.429658	-0.0755008	0.84692	0.37997	0.313117	0.392296	0.296347	0.552581	0.122851	0.552444	0.122963	0.214242	0.5799	-0.329008	0.387304	0.64366	0.0614052	-0.0838976	0.830085	0.251715	0.51352	0.246582	0.522429	-0.376544	0.317862
CL4912.Contig2_DB	black	0.329117	0.387137	-0.501525	0.168961	0.547259	0.127258	0.756575	0.0182938	0.0498631	0.89863	0.249324	0.517662	0.495125	0.175348	0.164917	0.671555	-0.0171485	0.965074	-0.440078	0.235857	0.874771	0.00202025	-0.135522	0.728108	0.324025	0.394961	0.177737	0.647315	0.613598	0.0788332	0.510256	0.160467	0.439213	0.236887	0.344819	0.363473	-0.247509	0.520816	0.649951	0.0580985	0.190328	0.623782	-0.0144447	0.970579	0.328409	0.388221	-0.336743	0.375555
CL25129.Contig2_DB	black	0.457023	0.216171	-0.36894	0.328519	0.550814	0.124304	0.720354	0.0285954	0.0932681	0.811368	0.183323	0.63684	0.356777	0.345929	0.261595	0.496545	0.344629	0.363754	-0.658472	0.0538024	0.890293	0.00129154	0.060171	0.87779	0.106214	0.785646	0.239772	0.53434	0.491902	0.178615	0.722384	0.0279365	0.221731	0.566393	0.568944	0.109879	-0.340686	0.369633	0.517775	0.153353	0.129504	0.739835	-0.106165	0.785743	-0.0180985	0.96314	-0.281387	0.463251
CL5838.Contig1_DB	black	0.486543	0.184125	-0.382257	0.309971	0.568135	0.1105	0.709826	0.0321757	0.0750774	0.84777	0.360918	0.339952	0.614045	0.0785544	0.126835	0.745052	0.172152	0.657841	-0.373885	0.321569	0.942661	0.000140489	0.174329	0.653731	0.558296	0.118222	-0.0189597	0.961387	0.340351	0.370134	0.428103	0.250332	0.183761	0.63602	0.533661	0.138938	-0.271573	0.47964	0.53873	0.134513	-0.0841126	0.829654	-0.139208	0.720947	0.236633	0.539867	-0.213913	0.580497
CL10958.Contig1_DB	black	0.367278	0.330873	-0.353672	0.350443	0.655304	0.0553751	0.571499	0.107932	-0.0503791	0.897585	0.157472	0.685756	0.357382	0.345052	0.260595	0.498253	0.438587	0.237634	-0.222761	0.564545	0.71795	0.0293887	0.0136882	0.972119	0.311649	0.41428	0.39426	0.293718	0.409382	0.273883	0.617473	0.0764332	0.17336	0.65556	0.659329	0.0533822	0.05859	0.880982	0.532263	0.140173	0.453699	0.219959	-0.374691	0.320444	0.199429	0.606953	-0.265162	0.490474
CL17675.Contig1_DB	black	0.576729	0.104012	-0.409741	0.273421	0.401269	0.284436	0.693149	0.0384233	-0.148237	0.70349	0.295963	0.439363	0.813632	0.00762794	0.489847	0.180717	0.270057	0.482193	-0.241617	0.531104	0.95018	8.65423e-05	0.14696	0.705951	0.525804	0.145963	0.270192	0.481965	0.501612	0.168875	0.359594	0.341858	0.108695	0.780737	0.617237	0.0765778	0.0696705	0.858641	0.495938	0.174529	-0.261581	0.49657	-0.310407	0.416242	0.2296	0.552326	0.159611	0.681667
CL14642.Contig2_DB	black	-0.529383	0.142738	0.420188	0.260152	-0.47594	0.195304	-0.746413	0.0208815	-0.00859567	0.98249	-0.302407	0.42898	-0.747261	0.0206569	-0.336539	0.375863	-0.411762	0.270828	0.31463	0.409588	-0.915866	0.000523449	-0.142439	0.714688	-0.515994	0.155022	-0.23554	0.541797	-0.286166	0.455359	-0.260659	0.498143	-0.179972	0.643116	-0.560198	0.116705	0.0703476	0.857279	-0.547926	0.126701	0.333136	0.381013	0.143615	0.712413	-0.262021	0.495819	0.0545618	0.889123
CL26016.Contig1_DB	black	0.410962	0.271853	-0.518357	0.152811	0.50156	0.168926	0.804211	0.00897639	-0.0136294	0.972239	0.280114	0.465363	0.730238	0.0254813	0.401649	0.283937	0.354727	0.348907	-0.260127	0.499054	0.920522	0.000430871	-0.0727741	0.852399	0.436606	0.240006	0.484884	0.18585	0.496506	0.173959	0.306922	0.421769	0.37103	0.325573	0.520286	0.15102	0.0672701	0.863474	0.727551	0.0263047	-0.0868376	0.824204	-0.148377	0.703219	0.422806	0.256882	-0.147925	0.704091
CL11174.Contig1_DB	black	0.629084	0.0695155	-0.260721	0.498038	0.406696	0.277355	0.465879	0.206255	-0.329832	0.386045	0.251288	0.514258	0.734351	0.0242543	0.45498	0.218495	0.231852	0.548325	0.0405565	0.917492	0.852523	0.00350029	0.317162	0.405623	0.693375	0.0383339	0.203958	0.598636	0.536493	0.136456	0.448512	0.225941	-0.164831	0.67172	0.820929	0.0066833	0.306093	0.42309	0.309824	0.417164	0.0835117	0.830857	-0.699007	0.0361467	0.137432	0.724395	0.321484	0.398894
CL1461.Contig5_DB	black	0.411876	0.270682	-0.478904	0.192141	0.243587	0.527655	0.625007	0.0718982	-0.279547	0.466305	-0.116636	0.765068	0.439575	0.236455	0.658248	0.0539129	0.202168	0.601917	-0.459492	0.21338	0.648801	0.0586941	-0.259572	0.500002	-0.122134	0.754262	0.649999	0.0580735	0.830089	0.00561444	0.539369	0.133961	0.303959	0.426496	0.355679	0.347522	0.127733	0.743296	0.373957	0.321468	0.114859	0.768568	-0.158152	0.684455	0.0235421	0.952063	0.135492	0.728166
CL16849.Contig1_DB	black	0.430462	0.247444	-0.440558	0.235287	0.34251	0.366907	0.532313	0.140129	-0.38897	0.300826	-0.00629227	0.987182	0.651174	0.0574687	0.652614	0.0567332	0.424774	0.254437	0.0773121	0.843283	0.617055	0.0766899	-0.122236	0.754062	0.346645	0.360766	0.76493	0.0163332	0.620967	0.0743084	0.273726	0.476024	0.157902	0.684934	0.591277	0.0935651	0.580991	0.100881	0.441665	0.233973	0.182493	0.638392	-0.505733	0.164836	0.308186	0.419762	0.229687	0.552171
Unigene32422_DB	black	0.598086	0.0889063	-0.330277	0.385364	0.402911	0.282284	0.572072	0.107499	-0.238341	0.536857	0.285487	0.456476	0.717969	0.0293825	0.509987	0.160725	0.115316	0.767668	-0.244031	0.526879	0.925193	0.000350208	0.206779	0.593475	0.481101	0.189817	0.140029	0.719355	0.613814	0.0786985	0.577781	0.103234	-0.0171554	0.96506	0.669009	0.0487773	0.0526921	0.892905	0.368506	0.329134	-0.0691465	0.859696	-0.455639	0.217744	0.0958515	0.806222	0.259246	0.500561
CL9575.Contig2_DB	black	0.524565	0.14709	-0.351695	0.353334	0.561841	0.115404	0.650871	0.0576243	-0.057543	0.883097	0.380499	0.312388	0.676263	0.0454987	0.350704	0.354785	0.253347	0.510701	-0.264209	0.492094	0.96732	2.01199e-05	0.200876	0.604291	0.543229	0.130657	0.138433	0.722451	0.447682	0.226907	0.560032	0.116837	0.0827036	0.832475	0.694284	0.037975	-0.0502535	0.89784	0.536466	0.136479	-0.0105665	0.978476	-0.36745	0.330628	0.216714	0.575429	-0.0183272	0.962675
CL22029.Contig1_DB	black	0.598043	0.0889354	-0.401748	0.283807	0.217449	0.574102	0.608857	0.0818324	-0.310074	0.416769	0.144747	0.710224	0.785912	0.0120388	0.592834	0.0924867	0.0905309	0.816827	-0.239064	0.535585	0.847109	0.00394904	0.0844378	0.829003	0.402743	0.282503	0.290772	0.447808	0.681065	0.043408	0.338569	0.372807	0.0678589	0.862288	0.509699	0.161001	0.149093	0.70184	0.32371	0.395449	-0.262843	0.494417	-0.328022	0.388814	0.114194	0.769879	0.371406	0.325044
CL1857.Contig8_DB	black	0.750973	0.0196922	-0.0758456	0.846227	0.303506	0.42722	0.365632	0.33321	-0.189928	0.624525	0.0816531	0.834579	0.409084	0.274268	0.20054	0.604907	0.242327	0.529859	-0.394153	0.293862	0.735036	0.0240537	0.557551	0.11882	0.427129	0.251529	-0.221599	0.566631	0.300675	0.431759	0.546032	0.128287	-0.39123	0.29778	0.729337	0.0257555	-0.216842	0.575199	-0.0837917	0.830296	-0.0999375	0.798096	-0.477601	0.193529	-0.392998	0.295406	0.263651	0.493042
CL6095.Contig7_DB	black	0.558296	0.118222	-0.33187	0.382937	0.371105	0.325467	0.625484	0.0716169	-0.0865128	0.824853	0.178638	0.645621	0.500886	0.169592	0.373973	0.321446	0.0853896	0.827099	-0.581127	0.100782	0.881663	0.0016688	0.142441	0.714684	0.197637	0.610253	0.0573455	0.883496	0.596554	0.0899416	0.653163	0.0564546	0.0793679	0.839159	0.507761	0.162868	-0.281064	0.463787	0.318703	0.403217	-0.0874055	0.823069	-0.178437	0.645998	-0.0896465	0.818592	0.0617949	0.874512
CL11317.Contig1_DB	black	0.375706	0.319027	-0.519942	0.151338	0.399823	0.286339	0.676919	0.0452093	-0.24314	0.528436	0.167512	0.666626	0.665525	0.0504043	0.577575	0.103385	0.0701782	0.85762	-0.193377	0.618126	0.827619	0.00589018	-0.207643	0.591899	0.28639	0.454992	0.547453	0.127095	0.829723	0.0056547	0.491046	0.179489	0.353447	0.350772	0.459769	0.213069	0.231132	0.549602	0.611759	0.0799883	0.179456	0.644084	-0.295021	0.440891	0.362229	0.338071	0.0688641	0.860264
CL3033.Contig1_DB	black	0.646437	0.0599314	-0.233459	0.545475	0.407507	0.276303	0.464988	0.207241	-0.212105	0.583776	0.31239	0.413112	0.727371	0.0263604	0.298718	0.434911	0.117259	0.763841	-0.111784	0.774633	0.832864	0.00531519	0.399876	0.286268	0.717937	0.029393	-0.157508	0.685688	0.312247	0.413337	0.370935	0.325706	-0.181375	0.640487	0.652864	0.0566061	-0.0073262	0.985076	0.200822	0.60439	-0.219284	0.570793	-0.460682	0.212043	0.0775057	0.842895	0.269651	0.482877
CL25290.Contig1_DB	black	0.302673	0.428553	-0.53386	0.138763	0.457866	0.215216	0.823391	0.00638352	0.0750944	0.847736	0.118401	0.761596	0.45692	0.216288	0.254212	0.509208	0.260374	0.49863	-0.46655	0.205515	0.835707	0.00502011	-0.228171	0.554871	0.157894	0.684949	0.554736	0.121093	0.640579	0.0630668	0.39622	0.291107	0.514737	0.156205	0.381276	0.311319	-0.101738	0.794521	0.731467	0.0251106	0.186257	0.631359	0.0153797	0.968675	0.30871	0.418929	-0.376875	0.317402
Unigene71_DB	black	0.669499	0.0485512	-0.17635	0.649924	0.243069	0.528561	0.460353	0.212412	-0.21826	0.572639	0.0772875	0.843333	0.51243	0.158391	0.182886	0.637657	0.189474	0.625369	-0.175622	0.651294	0.804032	0.00900344	0.409322	0.273961	0.571788	0.107713	0.100481	0.797017	0.547428	0.127116	0.362163	0.338166	-0.215812	0.57706	0.757496	0.0180703	0.0592206	0.879709	0.156274	0.688049	0.119557	0.759323	-0.56445	0.113356	-0.133399	0.732239	0.190219	0.623984
CL14482.Contig2_DB	black	0.453771	0.219876	-0.37324	0.322471	0.602102	0.0862263	0.698368	0.0363906	0.0411903	0.916206	0.350228	0.355484	0.596745	0.0898126	0.304679	0.425345	0.415426	0.266158	-0.303688	0.426929	0.93432	0.000224127	0.130956	0.737002	0.454071	0.219533	0.285179	0.456985	0.376603	0.31778	0.524855	0.146826	0.175244	0.652006	0.68555	0.0415119	-0.0594091	0.879328	0.632833	0.0673689	0.044804	0.908879	-0.286657	0.454551	0.251995	0.513036	-0.184884	0.633922
CL23599.Contig1_DB	black	0.588909	0.0952198	-0.317817	0.4046	0.364406	0.334958	0.615293	0.0777777	-0.178626	0.645643	0.221494	0.566818	0.694906	0.0377309	0.451107	0.222937	0.382682	0.309388	-0.158139	0.68448	0.919545	0.000449274	0.227235	0.55654	0.51509	0.155872	0.409882	0.273239	0.567918	0.110668	0.409531	0.273691	-0.00798466	0.983735	0.787989	0.0116602	0.203904	0.598734	0.4623	0.210232	0.00206637	0.99579	-0.514887	0.156063	0.123799	0.750998	0.157573	0.685563
CL5508.Contig1_DB	black	0.213421	0.581389	-0.618239	0.0759642	0.523333	0.148216	0.788186	0.0116249	-0.0359412	0.92686	0.232958	0.546364	0.621986	0.073696	0.412855	0.26943	0.0910495	0.815792	-0.2652	0.490409	0.795739	0.010319	-0.373806	0.321679	0.255809	0.506458	0.529425	0.142701	0.653545	0.056261	0.375565	0.319224	0.608936	0.081782	0.263795	0.492798	0.0596877	0.878766	0.801547	0.00938497	0.128699	0.741408	0.00614903	0.987474	0.569657	0.109334	-0.257741	0.50314
CL10017.Contig1_DB	black	0.553208	0.122338	-0.362894	0.337118	0.418428	0.262363	0.614527	0.078254	-0.185228	0.63328	0.310178	0.416605	0.826632	0.00600299	0.472628	0.198873	0.366812	0.331533	-0.0297211	0.939497	0.887558	0.00140388	0.194435	0.616168	0.650437	0.0578479	0.335196	0.377892	0.41552	0.266039	0.27214	0.478687	0.0360751	0.926588	0.703769	0.0343617	0.254125	0.509357	0.497309	0.173153	-0.175181	0.652125	-0.454988	0.218485	0.302612	0.428651	0.184247	0.635111
CL6726.Contig3_DB	black	0.468033	0.203883	-0.374304	0.320983	0.490019	0.180541	0.602393	0.0860346	-0.116401	0.765532	0.381912	0.310445	0.752951	0.0191905	0.222187	0.565574	0.0403564	0.917898	-0.0186462	0.962025	0.898507	0.000991766	0.160441	0.680083	0.767584	0.015741	0.0727631	0.852421	0.469653	0.202109	0.306055	0.42315	0.122272	0.753992	0.582195	0.100008	0.0812915	0.835304	0.532623	0.139855	0.0278587	0.943284	-0.382295	0.309919	0.400101	0.285972	0.00112275	0.997713
CL7384.Contig4_DB	black	0.461286	0.211366	-0.394286	0.293684	0.504566	0.165974	0.705422	0.0337559	-0.0041401	0.991566	0.357665	0.344643	0.704619	0.0340493	0.23876	0.536119	0.271473	0.479808	-0.155158	0.690188	0.955379	5.91456e-05	0.136235	0.72672	0.63604	0.065566	0.274287	0.475084	0.454912	0.218572	0.326645	0.390926	0.190918	0.622685	0.649326	0.0584219	0.0412081	0.91617	0.648286	0.0589625	0.0175673	0.964221	-0.317012	0.405857	0.359497	0.341997	-0.12966	0.739531
CL24466.Contig1_DB	black	0.516615	0.154438	-0.295074	0.440804	0.576995	0.103814	0.645251	0.0605578	0.0778274	0.84225	0.375327	0.319556	0.52738	0.144538	0.248317	0.51941	0.277539	0.469649	-0.499139	0.171327	0.942523	0.000141659	0.252641	0.511918	0.379738	0.313438	-0.0292882	0.940377	0.317019	0.405846	0.653847	0.0561081	0.064046	0.869972	0.629772	0.0691183	-0.33272	0.381645	0.464247	0.208063	-0.0982359	0.801478	-0.201293	0.603524	0.0489343	0.900511	-0.132273	0.734434
Unigene3466_DB	black	0.48975	0.180816	-0.369248	0.328085	0.30285	0.42827	0.623662	0.0726948	-0.178967	0.645002	0.164069	0.673169	0.59981	0.0877498	0.313979	0.410612	0.050683	0.89697	-0.18381	0.635929	0.8931	0.00118287	0.0754604	0.847001	0.470923	0.200724	0.364084	0.335417	0.799444	0.00971624	0.411804	0.270773	0.141648	0.716218	0.615801	0.0774634	0.132626	0.733746	0.493336	0.177158	0.232733	0.546763	-0.422313	0.257497	0.178088	0.646655	0.0480405	0.902321
CL1120.Contig1_DB	black	0.544244	0.129796	-0.150144	0.699817	0.57249	0.107182	0.50067	0.169806	0.0379747	0.922732	0.222595	0.564841	0.271115	0.48041	0.144334	0.711021	0.416635	0.264626	-0.463037	0.20941	0.837581	0.00483192	0.37487	0.320193	0.302645	0.428597	0.0415096	0.915559	0.339253	0.37178	0.793032	0.010775	-0.128333	0.742123	0.820337	0.00675679	-0.259141	0.500739	0.317792	0.404638	0.293937	0.442651	-0.436774	0.239804	-0.185026	0.633657	-0.169798	0.662294
CL1326.Contig1_DB	black	0.512523	0.158303	-0.370179	0.326771	0.441922	0.233669	0.655748	0.055153	-0.108917	0.780297	0.296196	0.438986	0.746207	0.0209365	0.476766	0.19442	0.45849	0.214511	-0.13881	0.72172	0.896851	0.00104782	0.14675	0.706356	0.51405	0.156854	0.431622	0.24603	0.422305	0.257506	0.345051	0.363128	0.0971115	0.803714	0.71002	0.032107	0.194019	0.616938	0.563632	0.113995	-0.126028	0.746632	-0.393925	0.294167	0.268752	0.484394	0.0792439	0.839408
CL13924.Contig1_DB	black	0.606126	0.0835923	-0.307674	0.420574	0.30423	0.426061	0.620681	0.0744811	-0.13101	0.736897	0.268181	0.485359	0.734188	0.024302	0.354947	0.348587	0.215092	0.578362	-0.22366	0.562932	0.937588	0.000188075	0.275855	0.47246	0.571711	0.107771	0.183151	0.63716	0.516504	0.154542	0.322708	0.396998	-0.0106978	0.978209	0.669595	0.0485071	0.0364263	0.925875	0.402716	0.282539	-0.194234	0.616539	-0.382631	0.309457	0.107291	0.783515	0.172552	0.657085
Unigene32342_DB	black	0.624821	0.0720081	-0.213082	0.582004	0.295256	0.440509	0.592484	0.0927289	-0.0263711	0.946308	0.107359	0.783381	0.42437	0.254939	0.257099	0.504241	0.377653	0.316323	-0.521749	0.149669	0.870659	0.00225265	0.330282	0.385357	0.256465	0.50533	0.193013	0.618801	0.483681	0.187106	0.522012	0.149427	-0.0809315	0.836025	0.711915	0.0314432	-0.193893	0.61717	0.277696	0.469386	-0.0414799	0.915619	-0.316948	0.405957	-0.226352	0.558116	0.0242588	0.950605
Unigene884_DB	black	0.395978	0.291429	-0.398481	0.28811	0.327237	0.390018	0.640449	0.0631376	-0.107364	0.783369	0.0474199	0.903578	0.533867	0.138756	0.235954	0.541064	0.394566	0.293311	-0.0464952	0.905451	0.731747	0.0250264	-0.0158142	0.96779	0.460124	0.21267	0.647665	0.0592868	0.570498	0.108693	0.13694	0.725351	0.230025	0.551569	0.598364	0.0887189	0.304833	0.425098	0.570597	0.108617	0.264136	0.492217	-0.358521	0.343405	0.298129	0.435861	-0.132153	0.734667
CL5052.Contig3_DB	black	0.355772	0.347388	-0.39124	0.297766	0.563186	0.114345	0.626784	0.0708534	-0.033061	0.93271	0.240135	0.533703	0.425638	0.253369	0.467908	0.204021	0.267122	0.487152	-0.464009	0.208328	0.805438	0.00879227	-0.0684002	0.861198	0.0837515	0.830377	0.335091	0.378051	0.544949	0.1292	0.769131	0.0154025	0.253855	0.509824	0.523497	0.148065	-0.113503	0.771242	0.553919	0.121758	0.174719	0.652996	-0.197623	0.610279	0.136447	0.726309	-0.129579	0.73969
CL5545.Contig1_DB	black	0.255758	0.506546	-0.410465	0.272491	0.568308	0.110368	0.636018	0.0655783	0.124924	0.748794	0.0334006	0.93202	0.141848	0.715832	0.36361	0.336094	0.434313	0.242767	-0.784992	0.0122089	0.565228	0.112749	-0.220757	0.568144	-0.318954	0.402826	0.313327	0.411637	0.278045	0.468805	0.728178	0.026111	0.383307	0.308531	0.243918	0.527076	-0.415326	0.266285	0.432797	0.244602	0.0406006	0.917403	0.208921	0.589568	-0.0340737	0.930653	-0.363621	0.336078
CL19937.Contig3_DB	black	0.538347	0.134844	-0.238301	0.536928	0.393227	0.2951	0.557219	0.119086	0.0200737	0.95912	0.274814	0.474201	0.496859	0.173604	0.0171629	0.965045	0.0218204	0.955565	-0.363866	0.335728	0.862848	0.0027439	0.325361	0.392902	0.552019	0.123312	-0.186234	0.631402	0.38518	0.305971	0.408864	0.274551	-0.0110743	0.977442	0.540858	0.13268	-0.311633	0.414305	0.308417	0.419394	-0.0365528	0.925618	-0.229274	0.552906	0.0132676	0.972975	-0.0841473	0.829585
CL17167.Contig2_DB	black	0.544515	0.129566	-0.228992	0.553408	0.334478	0.378977	0.516187	0.15484	-0.0555869	0.88705	0.184686	0.634291	0.404757	0.279873	0.160821	0.679357	-0.0411738	0.91624	-0.506382	0.164205	0.820056	0.00679191	0.260455	0.498491	0.3086	0.419104	-0.149361	0.701324	0.528636	0.143408	0.596563	0.0899354	-0.0264818	0.946083	0.500318	0.170155	-0.347595	0.359362	0.213122	0.58193	0.0100606	0.979507	-0.221931	0.566035	-0.145649	0.708481	0.0216834	0.955844
CL19390.Contig3_DB	black	0.489284	0.181295	-0.224051	0.562232	0.477852	0.193262	0.520959	0.150397	0.0766236	0.844665	0.299657	0.433397	0.474367	0.196995	-0.146073	0.707664	0.0741218	0.84969	-0.233943	0.544619	0.782026	0.0127687	0.351769	0.353225	0.698507	0.0363373	-0.275325	0.473346	0.176241	0.650129	0.269395	0.483309	-0.0106186	0.97837	0.513061	0.157791	-0.30551	0.424018	0.312282	0.413282	-0.00948275	0.980683	-0.206588	0.593824	0.11993	0.75859	-0.210333	0.586997
CL14766.Contig2_DB	black	0.403721	0.281225	-0.282967	0.460635	0.404794	0.279825	0.618577	0.0757578	0.130919	0.737075	0.117859	0.762663	0.240943	0.532285	-0.115551	0.767205	0.0819884	0.833907	-0.497881	0.172581	0.792281	0.0109039	0.135722	0.727718	0.305243	0.424445	0.0554839	0.887259	0.508399	0.162252	0.461562	0.211056	0.179597	0.643819	0.475842	0.195409	-0.36781	0.330119	0.422151	0.257698	0.314904	0.409159	-0.112344	0.773529	-0.0113246	0.976932	-0.388352	0.301663
CL14526.Contig1_DB	black	0.377927	0.315942	-0.442612	0.232853	0.328764	0.387677	0.610172	0.0809941	-0.171319	0.659415	0.266343	0.48847	0.740561	0.0224762	0.186876	0.630206	-0.166698	0.668172	0.0519281	0.89445	0.817177	0.00715847	-0.0193906	0.96051	0.725339	0.0269953	0.197084	0.611273	0.663877	0.0511854	0.124067	0.750472	0.269247	0.483559	0.399199	0.287161	0.180478	0.642168	0.554224	0.121509	0.107733	0.78264	-0.295091	0.440778	0.492799	0.177703	0.00213099	0.995659
Unigene36370_DB	black	0.274277	0.4751	-0.511894	0.158901	0.473593	0.197829	0.693881	0.0381338	0.0374125	0.923873	0.337808	0.373951	0.658747	0.0536675	0.113615	0.771021	-0.170926	0.660159	-0.241968	0.530489	0.771479	0.0148982	-0.140428	0.718582	0.52625	0.14556	-0.0262319	0.946591	0.40134	0.284343	0.183632	0.636262	0.454812	0.218686	0.137676	0.723921	-0.210662	0.586399	0.597471	0.0893212	-0.148738	0.702524	0.116282	0.765766	0.5203	0.151007	-0.233887	0.544719
CL16386.Contig1_DB	black	0.552054	0.123284	-0.29411	0.44237	0.459701	0.213145	0.63181	0.0679504	-0.0433286	0.91187	0.364699	0.33454	0.658483	0.0537974	0.419335	0.261223	0.334879	0.378372	-0.331077	0.384145	0.974578	8.4134e-06	0.258753	0.501404	0.440474	0.235386	0.199574	0.606684	0.45368	0.219981	0.568516	0.110208	0.0148438	0.969766	0.738318	0.0231081	-0.0534638	0.891344	0.497267	0.173195	-0.117298	0.763765	-0.377116	0.317068	0.095559	0.806804	0.0656088	0.866821
CL19335.Contig3_DB	black	0.446471	0.22832	-0.393808	0.294323	0.418231	0.262612	0.681304	0.0433057	-0.0345726	0.929639	0.304486	0.425653	0.747833	0.0205063	0.258336	0.502119	0.355906	0.347193	-0.0372407	0.924221	0.875672	0.00197164	0.119265	0.759897	0.669736	0.048442	0.383354	0.308467	0.387083	0.303382	0.125768	0.747142	0.186018	0.631805	0.618789	0.0756284	0.180768	0.641624	0.628539	0.0698315	-0.0805966	0.836696	-0.313778	0.410928	0.407833	0.275882	-0.0713093	0.855344
CL24817.Contig1_DB	black	0.619936	0.0749316	-0.154213	0.692	0.371837	0.324438	0.472812	0.198674	-0.121184	0.756127	0.209309	0.588861	0.558548	0.11802	0.203229	0.599971	0.463046	0.209399	-0.0622715	0.873551	0.827497	0.00590405	0.455296	0.218134	0.655296	0.0553793	0.21073	0.586276	0.337831	0.373916	0.337308	0.374704	-0.220758	0.568142	0.889503	0.0013233	0.153555	0.693262	0.30544	0.42413	0.0880895	0.821702	-0.623374	0.0728661	-0.00423447	0.991374	0.0968452	0.804244
CL14691.Contig2_DB	black	0.466032	0.206087	-0.346771	0.360579	0.425469	0.253577	0.667703	0.0493829	-0.00427058	0.9913	0.310911	0.415446	0.678268	0.0446178	0.200811	0.604409	0.338988	0.372178	-0.0952869	0.807346	0.912622	0.000595611	0.18353	0.636453	0.651863	0.057116	0.336002	0.376674	0.426994	0.251696	0.223578	0.56308	0.135826	0.727515	0.683104	0.0425395	0.110864	0.77645	0.611965	0.0798586	0.0187533	0.961807	-0.359801	0.34156	0.320409	0.400563	-0.108098	0.781918
Unigene33413_DB	black	0.575484	0.104937	-0.159191	0.68247	0.392931	0.295496	0.43311	0.244223	-0.0563331	0.885542	0.301494	0.430444	0.539442	0.133898	-0.000413349	0.999158	0.0365963	0.92553	-0.173484	0.655326	0.790631	0.0111907	0.451797	0.222142	0.717801	0.0294384	-0.303943	0.42652	0.246653	0.522305	0.33038	0.385208	-0.1727	0.656805	0.600501	0.087289	-0.199453	0.606908	0.188405	0.627357	-0.0726693	0.852609	-0.369911	0.327149	0.0164918	0.966411	0.0420868	0.914388
CL552.Contig2_DB	black	0.314779	0.409354	-0.430975	0.246818	0.49923	0.171236	0.750197	0.0198912	0.207967	0.591307	0.317987	0.404335	0.470867	0.200784	0.0130632	0.973392	0.0223448	0.954499	-0.512644	0.158187	0.865311	0.00258173	-0.0250017	0.949094	0.348622	0.357848	0.0110165	0.97756	0.395794	0.291674	0.375505	0.319308	0.404316	0.280448	0.287924	0.45247	-0.431026	0.246755	0.624569	0.0721567	-0.046044	0.906365	0.13523	0.728676	0.282768	0.460965	-0.414562	0.267255
CL4256.Contig1_DB	black	-0.622476	0.0734022	0.216843	0.575196	-0.174967	0.652529	-0.53602	0.136868	0.128225	0.742335	0.0101412	0.979342	-0.439437	0.23662	-0.484187	0.186576	-0.509911	0.160797	0.521483	0.149914	-0.728869	0.0258987	-0.251092	0.514597	-0.0606717	0.876779	-0.357795	0.344455	-0.434916	0.24204	-0.447952	0.226593	0.104192	0.789653	-0.633524	0.0669779	0.058959	0.880237	-0.168191	0.665339	0.247602	0.520653	0.273401	0.476569	0.295424	0.440238	-0.222402	0.565188
CL2149.Contig3_DB	black	0.438982	0.237162	-0.348484	0.35805	0.507941	0.162695	0.632696	0.0674469	0.0223975	0.954391	0.445058	0.229974	0.725225	0.0270312	0.163707	0.673858	0.139402	0.720571	-0.118353	0.76169	0.91106	0.00063273	0.197697	0.610143	0.720065	0.02869	0.021512	0.956193	0.312493	0.41295	0.278208	0.468533	0.141879	0.715771	0.557858	0.118573	-0.0593136	0.879521	0.573564	0.106374	-0.12413	0.750349	-0.254991	0.507867	0.38227	0.309953	-0.0985007	0.800951
CL403.Contig3_DB	black	0.407169	0.276741	-0.345983	0.361746	0.575116	0.105212	0.660668	0.0527292	0.0710481	0.855869	0.43506	0.241866	0.583871	0.0987994	0.250259	0.516041	0.189173	0.625928	-0.329475	0.38659	0.952366	7.41246e-05	0.135383	0.728377	0.461404	0.211234	0.10738	0.783338	0.425383	0.253683	0.579299	0.102117	0.185829	0.632158	0.604052	0.0849437	-0.172514	0.657158	0.625886	0.0713802	0.0366958	0.925328	-0.239092	0.535536	0.260922	0.497694	-0.179656	0.643709
CL257.Contig1_DB	black	0.397232	0.289764	-0.310429	0.416207	0.533872	0.138752	0.636312	0.065415	0.156298	0.688004	0.375002	0.320008	0.457134	0.216045	-0.0114906	0.976594	0.0308747	0.937152	-0.426764	0.251979	0.887171	0.00142029	0.176925	0.648841	0.474456	0.196898	-0.140006	0.7194	0.348713	0.357714	0.489523	0.181049	0.185213	0.633307	0.46295	0.209507	-0.404205	0.280593	0.511304	0.159464	0.0364108	0.925906	-0.0840416	0.829796	0.174282	0.653821	-0.310541	0.416031
CL14641.Contig2_DB	black	0.518436	0.152737	-0.22898	0.553429	0.288235	0.45196	0.40586	0.278439	-0.282461	0.461472	0.219799	0.569867	0.5922	0.092925	0.225622	0.55942	-0.12464	0.74935	0.0321029	0.934657	0.790561	0.0112029	0.256712	0.504907	0.674581	0.0462459	0.0494385	0.89949	0.683264	0.0424715	0.399687	0.286518	-0.0938616	0.810185	0.644998	0.0606919	0.181255	0.64071	0.2792	0.466883	0.26746	0.486579	-0.604148	0.0848807	0.133209	0.732609	0.216182	0.576391
CL5973.Contig1_DB	black	0.292487	0.44501	-0.397175	0.289839	0.464063	0.208268	0.552437	0.12297	-0.154387	0.691665	0.157553	0.685601	0.529797	0.142368	0.32514	0.393242	0.326314	0.391435	0.0887325	0.820418	0.680166	0.0437944	-0.0885401	0.820802	0.47012	0.201599	0.614226	0.0784412	0.549533	0.125364	0.296736	0.438112	0.247699	0.520484	0.597065	0.0895956	0.396497	0.290739	0.624364	0.0722785	0.413922	0.268069	-0.446986	0.227718	0.432318	0.245184	-0.11923	0.759965
CL15416.Contig1_DB	black	0.300719	0.431689	-0.490439	0.18011	0.447145	0.227533	0.794249	0.0105683	0.162409	0.67633	0.328179	0.388573	0.600934	0.087001	0.0878957	0.822089	0.035795	0.927157	-0.38663	0.303998	0.885986	0.00147144	-0.089707	0.818472	0.430818	0.247009	0.163058	0.675092	0.451609	0.222359	0.226074	0.558612	0.469962	0.201772	0.278465	0.468107	-0.262703	0.494656	0.711624	0.0315445	-0.110931	0.776318	0.11534	0.767621	0.423933	0.255481	-0.355162	0.348273
CL15971.Contig4_DB	black	-0.212567	0.582937	0.46073	0.211989	-0.270964	0.480665	-0.446187	0.228652	0.356376	0.34651	0.185584	0.632614	-0.291338	0.446883	-0.663918	0.0511661	-0.145206	0.709337	0.230927	0.549966	-0.377046	0.317165	0.437132	0.239375	0.210142	0.587345	-0.728586	0.0259856	-0.770624	0.0150806	-0.515366	0.155612	-0.355668	0.347539	-0.220775	0.568111	-0.323658	0.395529	-0.337999	0.373664	-0.372321	0.32376	0.190825	0.622858	-0.148003	0.703941	-0.10878	0.780568
CL14010.Contig2_DB	black	-0.628921	0.0696101	0.122832	0.752893	-0.282822	0.460875	-0.457757	0.215339	0.0972488	0.803441	-0.205055	0.596627	-0.483016	0.187802	-0.122606	0.753337	-0.191026	0.622485	0.230736	0.550307	-0.861003	0.00286987	-0.474083	0.197301	-0.569847	0.109189	-0.00578681	0.988212	-0.475078	0.19623	-0.436316	0.240354	0.226093	0.55858	-0.788905	0.011496	0.0632826	0.871511	-0.222094	0.56574	-0.0888775	0.820128	0.533643	0.138953	0.137021	0.725193	-0.108355	0.781409
CL15718.Contig1_DB	black	0.599616	0.0878795	-0.20868	0.590007	0.418287	0.262541	0.563057	0.114447	-0.00589187	0.987998	0.372925	0.322912	0.664645	0.0508204	0.27749	0.469731	0.385372	0.30571	-0.263118	0.493949	0.916171	0.000516987	0.420178	0.260165	0.582229	0.0999833	0.023007	0.953151	0.229671	0.5522	0.390838	0.298306	-0.118639	0.761128	0.742067	0.0220583	-0.0993955	0.799173	0.373061	0.322722	-0.281019	0.463861	-0.370088	0.326899	0.0440578	0.910391	0.0880227	0.821835
CL17353.Contig1_DB	black	0.265698	0.489565	-0.462632	0.209861	0.60232	0.0860824	0.764154	0.016509	0.179988	0.643087	0.399519	0.286739	0.558851	0.117778	0.190782	0.622938	0.236818	0.53954	-0.356141	0.346852	0.88757	0.00140338	-0.0813151	0.835256	0.375501	0.319314	0.261029	0.497512	0.368217	0.329542	0.417123	0.26401	0.436811	0.23976	0.419785	0.260658	-0.192891	0.619026	0.785828	0.0120542	0.0133156	0.972878	0.000526925	0.998927	0.44247	0.233021	-0.396205	0.291127
CL13165.Contig1_DB	black	0.706048	0.0335284	-0.0780185	0.841866	0.315461	0.408285	0.358146	0.343947	-0.240613	0.532864	0.249476	0.517399	0.611318	0.0802671	0.424336	0.254981	0.394356	0.293591	-0.126142	0.746408	0.808201	0.00838708	0.554326	0.121426	0.559248	0.117461	0.0358219	0.927102	0.316365	0.406868	0.503305	0.167209	-0.400165	0.285888	0.895405	0.00109853	0.118209	0.761972	0.109322	0.779497	-0.143574	0.712491	-0.682573	0.0427644	-0.175572	0.651389	0.403021	0.28214
CL622.Contig1_DB	black	0.101902	0.794195	-0.516383	0.154656	0.538211	0.134962	0.55157	0.123682	-0.122184	0.754165	0.194953	0.615209	0.431015	0.246769	0.315635	0.408013	-0.139018	0.721317	-0.113954	0.770352	0.579286	0.102127	-0.390916	0.298202	0.231407	0.549115	0.330628	0.38483	0.63039	0.0687631	0.474389	0.196971	0.516946	0.154129	0.172905	0.656419	0.0895346	0.818816	0.628679	0.0697501	0.414655	0.267137	-0.0877824	0.822316	0.536036	0.136854	-0.231964	0.548126
CL20466.Contig2_DB	black	0.347411	0.359634	-0.459262	0.21364	0.444869	0.230196	0.729919	0.0255783	0.00923667	0.981185	0.335011	0.378171	0.743762	0.0215942	0.325618	0.392505	0.337505	0.374408	-0.0838576	0.830165	0.868892	0.00235802	-0.0309056	0.93709	0.551559	0.12369	0.479718	0.191278	0.423477	0.256047	0.159579	0.681729	0.335536	0.377378	0.523635	0.147939	0.168769	0.664244	0.746306	0.0209099	-0.0853352	0.827208	-0.199912	0.606064	0.506638	0.163956	-0.141501	0.716502
Unigene180_DB	black	-0.440564	0.23528	0.253701	0.510089	-0.468465	0.20341	-0.556994	0.119268	0.0394996	0.919637	-0.23255	0.547087	-0.437162	0.239339	-0.294128	0.44234	-0.412901	0.269371	0.212416	0.583212	-0.846475	0.00400398	-0.183149	0.637165	-0.369811	0.32729	-0.417204	0.263907	-0.526627	0.145218	-0.580556	0.101199	-0.0400977	0.918423	-0.796919	0.0101243	-0.0977186	0.802507	-0.531379	0.140957	-0.331109	0.384096	0.496597	0.173867	-0.0950569	0.807804	0.10409	0.789856
Unigene35436_DB	black	0.585484	0.0976443	-0.1661	0.669306	0.412492	0.269894	0.521952	0.149482	-0.0386025	0.921457	0.334605	0.378786	0.562415	0.114952	0.206028	0.594847	0.32251	0.397304	-0.198368	0.608906	0.936698	0.000197456	0.437443	0.239002	0.601243	0.0867953	0.101231	0.795528	0.413393	0.268744	0.496543	0.173921	-0.1542	0.692025	0.857449	0.00312361	-0.0174174	0.964526	0.394732	0.293089	0.0676515	0.862706	-0.544401	0.129663	0.0067084	0.986334	0.0403011	0.91801
CL5696.Contig4_DB	black	0.417664	0.263327	-0.410972	0.27184	0.402895	0.282305	0.721531	0.0282122	0.0391655	0.920315	0.404138	0.28068	0.738534	0.0230468	0.270819	0.480908	0.0998723	0.798225	-0.268103	0.485492	0.95927	4.31421e-05	0.0785469	0.840806	0.53851	0.134704	0.169667	0.662541	0.479162	0.191868	0.291524	0.44658	0.263383	0.493498	0.476728	0.194461	-0.0954938	0.806934	0.642281	0.0621456	-0.208647	0.590068	-0.132456	0.734076	0.357868	0.344349	-0.0801979	0.837495
CL21290.Contig1_DB	black	0.454756	0.21875	-0.323617	0.395592	0.469259	0.202539	0.716474	0.0298829	0.169721	0.662439	0.332214	0.382414	0.509317	0.161368	0.297324	0.437162	0.409059	0.274299	-0.597474	0.0893187	0.924853	0.000355687	0.159028	0.682781	0.205957	0.594978	0.177909	0.64699	0.307758	0.420441	0.537544	0.135541	0.176668	0.649325	0.55622	0.119891	-0.33884	0.372399	0.55148	0.123755	-0.247651	0.520568	-0.0427257	0.913092	0.0482821	0.901831	-0.184785	0.634106
CL23561.Contig2_DB	black	0.407397	0.276446	-0.324726	0.393881	0.400102	0.285971	0.42501	0.254145	-0.339214	0.371837	0.192675	0.619427	0.646524	0.0598853	0.672885	0.0470071	0.350641	0.354878	0.0828975	0.832087	0.65411	0.0559757	0.0146562	0.970148	0.374034	0.32136	0.53135	0.140983	0.519001	0.152211	0.457577	0.215543	0.0295167	0.939913	0.655421	0.0553164	0.480464	0.190489	0.41863	0.262109	0.123244	0.752086	-0.576474	0.104201	0.269365	0.48336	0.29466	0.441476
Unigene5456_DB	black	0.30891	0.418612	-0.377194	0.316959	0.40577	0.278555	0.538219	0.134955	-0.182344	0.638671	0.101843	0.794312	0.441816	0.233795	0.528573	0.143464	0.34218	0.3674	-0.149176	0.701681	0.674534	0.0462666	-0.134203	0.730674	0.1456	0.708575	0.66854	0.0489941	0.658391	0.0538423	0.539171	0.134132	0.228241	0.554747	0.57717	0.103685	0.298964	0.434514	0.550456	0.124599	0.353651	0.350474	-0.396965	0.290117	0.22458	0.561284	-0.00661445	0.986526
CL18680.Contig2_DB	black	0.508324	0.162325	-0.20222	0.601823	0.352199	0.352595	0.586618	0.0968373	0.137849	0.723585	0.240233	0.533531	0.405755	0.278575	-0.0774906	0.842925	0.17804	0.646745	-0.422548	0.257204	0.85548	0.00327063	0.349098	0.357147	0.483962	0.186812	-0.0749735	0.847979	0.32519	0.393166	0.338512	0.372893	0.00613992	0.987492	0.575642	0.104819	-0.349965	0.355871	0.358791	0.343015	-0.0210171	0.9572	-0.177776	0.647241	-0.0383357	0.921999	-0.214986	0.578554
Unigene5728_DB	black	0.587372	0.0963035	-0.144765	0.710188	0.298776	0.434818	0.448209	0.226294	-0.0199616	0.959348	0.261223	0.49718	0.517204	0.153887	0.0259781	0.947108	0.0697641	0.858453	-0.290232	0.44869	0.777613	0.013633	0.454785	0.218717	0.597805	0.0890956	-0.288297	0.451859	0.230285	0.551107	0.292178	0.445513	-0.172364	0.65744	0.547485	0.127069	-0.275516	0.473026	0.14706	0.705759	-0.227513	0.556044	-0.268636	0.48459	-0.0784477	0.841005	0.0729395	0.852066
CL27638.Contig2_DB	black	0.215179	0.578205	-0.44707	0.22762	0.502779	0.167726	0.54806	0.126589	-0.0909214	0.816048	0.312636	0.412723	0.509575	0.16112	0.34214	0.367459	-0.214717	0.57904	-0.25433	0.509005	0.698484	0.0363464	-0.208657	0.59005	0.266394	0.488384	0.0728305	0.852285	0.584079	0.0986499	0.56473	0.113138	0.380806	0.311966	0.214561	0.579322	-0.104781	0.788486	0.538047	0.135104	0.146012	0.707781	-0.0718783	0.8542	0.394011	0.294051	-0.0989968	0.799965
CL3631.Contig2_DB	black	0.390601	0.298626	-0.359427	0.342098	0.397521	0.289381	0.707053	0.0331647	0.157224	0.686232	0.339289	0.371726	0.537684	0.135419	0.0456307	0.907203	0.0356549	0.927441	-0.431506	0.246171	0.914875	0.000544809	0.109464	0.779217	0.443643	0.231637	0.0213071	0.95661	0.440089	0.235843	0.330581	0.3849	0.267425	0.486638	0.40836	0.275201	-0.334379	0.379128	0.574299	0.105823	-0.0986385	0.800677	-0.011955	0.975648	0.218106	0.572917	-0.264652	0.49134
CL6800.Contig1_DB	black	0.695537	0.0374844	-0.0547106	0.888822	0.287815	0.452649	0.377364	0.316724	-0.161784	0.67752	0.231547	0.548865	0.495214	0.175259	0.373189	0.322543	0.326535	0.391096	-0.330235	0.385429	0.833023	0.0052984	0.551725	0.123554	0.39862	0.287926	-0.0344954	0.929796	0.374167	0.321175	0.626917	0.0707756	-0.377576	0.31643	0.849698	0.0037298	-0.080402	0.837086	0.0890351	0.819813	-0.12417	0.75027	-0.579301	0.102115	-0.308862	0.418689	0.329409	0.386691
Unigene32581_DB	black	0.283387	0.459942	-0.430506	0.24739	0.430248	0.247705	0.730123	0.0255163	0.233045	0.54621	0.30774	0.42047	0.53731	0.135744	-0.0851632	0.827552	0.0630205	0.87204	-0.360256	0.340904	0.77453	0.0142596	-0.0146001	0.970262	0.488654	0.181943	-0.00283486	0.994225	0.217563	0.573897	0.0624299	0.873231	0.415098	0.266574	0.198244	0.609134	-0.356352	0.346546	0.607613	0.0826313	-0.220602	0.568422	0.209923	0.587743	0.394804	0.292993	-0.420298	0.260015
CL17505.Contig4_DB	black	-0.000231808	0.999528	-0.260988	0.497581	0.296811	0.437991	-0.00555691	0.98868	-0.244408	0.52622	-0.52549	0.146249	-0.344236	0.364339	-0.188535	0.627116	-0.292394	0.445162	-0.218047	0.573023	-0.388233	0.301824	-0.411932	0.27061	-0.238925	0.53583	-0.262572	0.49488	0.025926	0.947214	0.157344	0.686001	0.23365	0.545139	-0.465491	0.206684	-0.246329	0.52287	-0.366181	0.33243	0.488455	0.182149	0.301569	0.430323	-0.0752086	0.847507	-0.258738	0.50143
Unigene36660_DB	black	0.462031	0.210532	-0.340106	0.370501	0.200229	0.60548	0.552382	0.123014	-0.227255	0.556505	0.0750807	0.847763	0.513759	0.157129	0.687086	0.0408753	0.215661	0.577333	-0.432134	0.245408	0.750498	0.0198139	-0.0319079	0.935053	-0.0240292	0.951072	0.494491	0.175988	0.742775	0.0218637	0.600078	0.0875705	0.116401	0.765531	0.503495	0.167022	0.0877299	0.82242	0.3539	0.350111	-0.0650467	0.867954	-0.276729	0.470999	-0.0522792	0.89374	0.271539	0.479696
CL20300.Contig3_DB	black	0.477567	0.193564	-0.173318	0.655638	0.504104	0.166426	0.521239	0.150139	0.133906	0.731253	0.388724	0.301159	0.394866	0.29291	0.0339064	0.930993	0.103519	0.790986	-0.476184	0.195043	0.871941	0.00217836	0.361417	0.339235	0.422331	0.257473	-0.262574	0.494876	0.266806	0.487685	0.625988	0.0713201	-0.0346029	0.929578	0.584445	0.0983875	-0.453924	0.219701	0.348923	0.357403	-0.0205797	0.95809	-0.202409	0.601475	-0.0437329	0.91105	-0.171661	0.658768
Unigene38777_DB	black	0.258955	0.501059	-0.467381	0.2046	0.489051	0.181535	0.690683	0.0394087	0.0507202	0.896895	0.431678	0.245962	0.729361	0.0257483	0.148796	0.702412	0.019628	0.960027	-0.0326778	0.933489	0.848545	0.00382635	-0.0659699	0.866094	0.672304	0.0472696	0.202198	0.601862	0.416573	0.264704	0.143359	0.712907	0.403291	0.281787	0.366629	0.331794	0.0353175	0.928127	0.754703	0.0187534	-0.0228732	0.953423	-0.110258	0.777647	0.628884	0.0696314	-0.234544	0.543556
CL13232.Contig3_DB	black	0.292715	0.444639	-0.462531	0.209973	0.358536	0.343384	0.688224	0.0404077	-0.0275167	0.943979	0.363027	0.336928	0.719611	0.0288391	0.213106	0.58196	-0.103276	0.791469	-0.071594	0.854772	0.886458	0.0014509	-0.0841278	0.829624	0.598315	0.0887523	0.281778	0.462603	0.657952	0.0540588	0.195008	0.615108	0.388156	0.301928	0.381975	0.310358	0.0815122	0.834861	0.721112	0.0283483	0.0568045	0.88459	-0.174716	0.653002	0.538429	0.134773	-0.125755	0.747167
CL12503.Contig3_DB	black	0.56867	0.11009	-0.19743	0.610635	0.306364	0.422657	0.459373	0.213514	-0.214039	0.580269	0.34194	0.367758	0.724097	0.0273886	0.416414	0.264905	0.224843	0.560815	0.0156788	0.968066	0.887937	0.00138792	0.36017	0.341028	0.658482	0.0537977	0.213581	0.581099	0.518699	0.152492	0.394294	0.293673	-0.160673	0.679639	0.816688	0.00722202	0.25501	0.507833	0.37991	0.313201	-0.0209345	0.957368	-0.646476	0.0599106	0.130705	0.737492	0.298189	0.435764
CL2055.Contig2_DB	black	0.661524	0.0523145	0.0258951	0.947276	0.289938	0.449172	0.33048	0.385055	0.0380777	0.922522	0.140118	0.719184	0.271176	0.480308	0.00330424	0.993269	0.376623	0.317752	-0.478371	0.192709	0.663306	0.0514582	0.641118	0.062774	0.362181	0.338139	-0.329115	0.387141	0.0108804	0.977837	0.442245	0.233287	-0.404479	0.280236	0.675387	0.0458869	-0.414194	0.267722	-0.0767763	0.844359	-0.239132	0.535466	-0.305086	0.424695	-0.448266	0.226228	0.0743856	0.84916
CL26952.Contig2_DB	black	0.201088	0.603902	-0.478215	0.192875	0.474588	0.196757	0.569369	0.109554	-0.127413	0.743922	0.352089	0.352756	0.625132	0.0718241	0.442478	0.233012	-0.160746	0.6795	-0.134385	0.73032	0.722215	0.0279909	-0.242479	0.529594	0.329366	0.386756	0.214673	0.579121	0.608299	0.0821903	0.474681	0.196657	0.409937	0.273169	0.245567	0.524198	0.0586028	0.880956	0.621275	0.074123	0.0836419	0.830596	-0.123356	0.751866	0.509767	0.160936	-0.0281359	0.94272
CL29331.Contig1_DB	black	0.237244	0.538789	-0.418499	0.262273	0.537427	0.135642	0.65078	0.0576713	0.0882201	0.821441	0.388939	0.300869	0.640333	0.0632006	0.0929426	0.812017	0.240109	0.533748	0.0376376	0.923416	0.776977	0.0137607	-0.0255782	0.947921	0.671462	0.0476522	0.30959	0.417536	0.282991	0.460596	0.109431	0.779281	0.353592	0.350561	0.460657	0.212071	0.114211	0.769845	0.757513	0.0180661	0.0875095	0.822861	-0.179622	0.643773	0.611006	0.0804647	-0.322272	0.397672
CL26049.Contig2_DB	black	0.287045	0.453914	-0.460982	0.211706	0.248913	0.518375	0.687565	0.0406781	0.0216163	0.955981	0.248721	0.518708	0.684333	0.0420212	0.0483425	0.901709	-0.0817628	0.834359	-0.0678051	0.862397	0.772014	0.0147849	-0.08231	0.833263	0.624977	0.071916	0.23784	0.53774	0.512423	0.158397	-0.0961018	0.805724	0.408233	0.275365	0.23994	0.534046	0.0290212	0.94092	0.630657	0.06861	-0.095766	0.806392	-0.0134149	0.972675	0.521069	0.150296	-0.184804	0.634071
CL14975.Contig1_DB	black	0.405261	0.279217	-0.334075	0.379589	0.411179	0.271574	0.715806	0.0301082	0.177421	0.647908	0.339296	0.371715	0.596617	0.0898992	0.178825	0.64527	0.452498	0.221336	-0.328187	0.38856	0.888775	0.00135308	0.157712	0.685298	0.438789	0.237393	0.298758	0.434846	0.250284	0.515997	0.219132	0.571067	0.210276	0.587102	0.565923	0.112209	-0.126679	0.745357	0.639438	0.0636893	-0.227149	0.556694	-0.0973086	0.803322	0.245797	0.523797	-0.229317	0.55283
CL126.Contig1_DB	black	0.231216	0.549454	-0.282367	0.461628	0.48871	0.181886	0.4497	0.224564	-0.00179763	0.996338	0.0819565	0.833971	0.32268	0.397041	0.0707397	0.85649	0.564986	0.112938	0.102457	0.793094	0.473423	0.198014	0.00935918	0.980935	0.445995	0.228877	0.517748	0.153378	0.150878	0.698406	0.118458	0.761484	0.165651	0.67016	0.555409	0.120547	0.290293	0.448591	0.506582	0.16401	0.381626	0.310838	-0.338267	0.373261	0.343316	0.365706	-0.314559	0.4097
CL2242.Contig4_DB	black	0.257065	0.5043	-0.38678	0.303794	0.471523	0.200072	0.705805	0.0336166	0.18903	0.626195	0.230092	0.551451	0.298148	0.43583	0.292479	0.445023	0.26183	0.496145	-0.672509	0.0471772	0.804162	0.0089837	-0.123487	0.751609	-0.0808712	0.836146	0.339931	0.370763	0.501356	0.169128	0.66868	0.0489293	0.395311	0.292317	0.378257	0.315486	-0.35308	0.351307	0.638586	0.0641565	0.0797748	0.838343	0.0785522	0.840795	0.0948828	0.808151	-0.355931	0.347157
Unigene32030_DB	black	0.423106	0.256509	-0.316446	0.406743	0.345356	0.362675	0.670706	0.0479971	0.150492	0.699147	0.318328	0.403802	0.497151	0.173312	0.219732	0.569987	0.109762	0.778628	-0.620801	0.0744083	0.879777	0.0017604	0.127444	0.743861	0.200671	0.604668	-0.0075691	0.984581	0.386393	0.30432	0.467023	0.204994	0.200399	0.605167	0.375725	0.319002	-0.441238	0.23448	0.461586	0.21103	-0.314576	0.409674	0.0657049	0.866628	0.0317999	0.935272	-0.129308	0.740219
CL24196.Contig3_DB	black	-0.0596139	0.878915	0.297776	0.43643	-0.130802	0.737302	-0.0180957	0.963146	0.232527	0.547127	0.602504	0.0859614	0.113486	0.771274	0.0398756	0.918874	-0.0890364	0.819811	0.167523	0.666606	0.575937	0.1046	0.393569	0.294642	0.231222	0.549443	0.201852	0.602498	0.487907	0.182713	0.408119	0.275512	-0.210297	0.587063	0.66843	0.0490454	0.164443	0.672458	0.508568	0.162089	0.359415	0.342115	-0.600327	0.0874048	0.0286283	0.941719	0.0519717	0.894362
CL6652.Contig2_DB	black	0.632503	0.0675563	-0.0784949	0.84091	0.15726	0.686161	0.399794	0.286377	-0.130346	0.738191	0.0968708	0.804193	0.358715	0.343125	0.35736	0.345084	0.237747	0.537903	-0.50057	0.169906	0.768287	0.0155867	0.41726	0.263837	0.148245	0.703475	0.0549579	0.888322	0.512171	0.158637	0.626251	0.0711658	-0.267332	0.486796	0.697069	0.0368898	-0.176457	0.649722	0.0665114	0.865003	-0.0871243	0.823631	-0.415182	0.266467	-0.408425	0.275117	0.274082	0.475427
CL10278.Contig1_DB	black	0.510822	0.159925	-0.28237	0.461624	0.22484	0.56082	0.577042	0.103779	-0.15089	0.698382	0.275896	0.472391	0.677934	0.0447638	0.488063	0.182553	0.195907	0.613447	-0.200911	0.604227	0.921805	0.00040754	0.185266	0.633209	0.404324	0.280438	0.386346	0.304384	0.685773	0.0414193	0.428847	0.249419	0.026112	0.946835	0.692275	0.0387706	0.158623	0.683555	0.480228	0.190739	-0.060508	0.87711	-0.450332	0.223832	0.105959	0.786152	0.223117	0.563905
CL22028.Contig2_DB	black	0.25785	0.502952	-0.408767	0.274676	0.344546	0.363878	0.713522	0.0308875	0.141213	0.717061	0.169345	0.663152	0.31594	0.407534	0.223604	0.563033	0.0644594	0.869138	-0.631543	0.0681032	0.809158	0.00824975	-0.160397	0.680167	-0.0279623	0.943073	0.339996	0.370666	0.671778	0.0475084	0.555796	0.120234	0.432913	0.244462	0.305589	0.423893	-0.320912	0.399781	0.619356	0.0752833	0.133822	0.731416	0.0854266	0.827025	0.112266	0.773682	-0.322922	0.396666
CL1688.Contig1_DB	black	-0.02715	0.944724	0.256117	0.505929	-0.297097	0.437528	0.0665166	0.864992	0.261053	0.49747	0.457836	0.215249	0.147486	0.704938	0.00879464	0.982085	0.0565122	0.88518	0.13682	0.725584	0.54113	0.132447	0.360557	0.34047	0.198135	0.609335	0.391917	0.296856	0.461651	0.210957	0.107521	0.783059	-0.152083	0.696088	0.603107	0.0855638	0.214381	0.57965	0.502604	0.167898	0.16634	0.668851	-0.471918	0.199643	0.00716451	0.985405	0.0441696	0.910165
CL18323.Contig1_DB	black	0.523354	0.148196	-0.0942877	0.809336	0.260663	0.498137	0.489452	0.181123	0.0776365	0.842632	0.0721014	0.853751	0.209035	0.589361	0.0810994	0.835689	0.454004	0.219609	-0.479541	0.191466	0.763098	0.0167504	0.37566	0.319092	0.18822	0.627702	0.233543	0.545327	0.407768	0.275967	0.507916	0.162719	-0.129776	0.739305	0.751613	0.0195289	-0.198909	0.60791	0.268107	0.485485	0.176828	0.649025	-0.354728	0.348905	-0.299471	0.433696	-0.12606	0.746569
Unigene30782_DB	black	0.380673	0.312149	-0.25889	0.50117	0.417473	0.263567	0.610778	0.080609	0.1323	0.734381	0.155652	0.68924	0.297479	0.436911	0.366204	0.332397	0.635704	0.0657536	-0.565969	0.112173	0.742563	0.021922	0.0900773	0.817732	-0.0413594	0.915863	0.46406	0.208272	0.307313	0.421148	0.584978	0.0980054	0.137606	0.724058	0.60913	0.0816584	-0.170756	0.660481	0.49374	0.176747	-0.0172583	0.96485	-0.130026	0.738818	-0.0749117	0.848103	-0.197663	0.610206
CL1363.Contig2_DB	black	0.170248	0.661442	-0.538108	0.135052	0.449929	0.224298	0.802078	0.00930258	0.1811	0.641002	0.379327	0.314006	0.616748	0.0768786	0.243846	0.527202	0.0621357	0.873825	-0.370659	0.326096	0.84387	0.00423549	-0.25594	0.506232	0.280967	0.463948	0.328632	0.38788	0.468093	0.203817	0.253831	0.509865	0.603262	0.0854622	0.193164	0.618521	-0.183128	0.637204	0.837806	0.00480963	-0.151611	0.696995	0.193475	0.617945	0.546806	0.127638	-0.356151	0.346836
CL9240.Contig3_DB	black	-0.0263059	0.946441	-0.295586	0.439974	0.277818	0.469183	-0.0206816	0.957883	-0.205757	0.595343	-0.493721	0.176767	-0.176245	0.650121	-0.0578984	0.882379	-0.0380288	0.922622	-0.165554	0.670344	-0.567895	0.110685	-0.441082	0.234664	-0.245794	0.523801	-0.319206	0.402434	-0.469944	0.201791	-0.193849	0.617253	0.251933	0.513143	-0.680114	0.0438171	-0.235373	0.54209	-0.445891	0.228998	-0.171586	0.65891	0.579095	0.102267	0.0404507	0.917707	-0.142226	0.715099
CL11409.Contig2_DB	black	0.409262	0.274038	-0.326925	0.390496	0.189888	0.624599	0.658158	0.0539571	0.00197766	0.995971	0.100782	0.796419	0.465316	0.206878	0.371602	0.324768	0.366521	0.331947	-0.403084	0.282057	0.811185	0.00796396	0.0271209	0.944784	0.125461	0.747741	0.583607	0.0989887	0.630182	0.0688828	0.343286	0.36575	0.202077	0.602085	0.553926	0.121753	0.030196	0.938532	0.531231	0.141089	-0.00705898	0.98562	-0.194417	0.616202	0.041327	0.915929	-0.0445082	0.909478
CL15877.Contig1_DB	black	0.429594	0.248505	-0.184327	0.634962	0.336933	0.375269	0.53484	0.137901	0.221828	0.566219	0.20669	0.593639	0.244343	0.526334	-0.0303042	0.938312	0.104001	0.790031	-0.725375	0.0269842	0.711084	0.0317334	0.255339	0.507266	0.125307	0.748044	-0.282334	0.461683	0.171034	0.659955	0.471792	0.199779	0.057756	0.882667	0.310322	0.416377	-0.671242	0.0477522	0.216912	0.575072	-0.26076	0.497971	0.141245	0.716999	-0.203994	0.59857	-0.231579	0.54881
CL11321.Contig1_DB	black	0.191303	0.62197	-0.471111	0.200519	0.418267	0.262567	0.689801	0.039765	0.0156994	0.968024	0.281507	0.463052	0.516764	0.154299	0.431353	0.246358	0.127856	0.743056	-0.29658	0.438364	0.806131	0.00868941	-0.254554	0.508618	0.14281	0.713969	0.555003	0.120876	0.689085	0.0400562	0.491749	0.178771	0.476652	0.194543	0.381273	0.311323	0.0521162	0.89407	0.775319	0.0140974	0.17637	0.649885	-0.101202	0.795584	0.408914	0.274486	-0.19793	0.609714
CL10819.Contig1_DB	black	0.2618	0.496196	-0.250163	0.516208	0.548567	0.126166	0.607184	0.0829077	0.319995	0.401207	0.224829	0.560839	0.0840988	0.829682	0.0462051	0.906039	0.33108	0.38414	-0.769431	0.0153374	0.722823	0.0277955	0.0475962	0.903221	-0.0964619	0.805007	0.0758054	0.846308	0.251355	0.514142	0.738969	0.0229234	0.25411	0.509384	0.408567	0.274934	-0.591808	0.0931964	0.496899	0.173564	0.147325	0.705247	0.109902	0.77835	-0.0873539	0.823172	-0.515423	0.155558
CL17965.Contig1_DB	black	0.651367	0.0573698	-0.00216445	0.995591	0.266064	0.488944	0.343685	0.365158	-0.035613	0.927526	0.250016	0.516462	0.389819	0.29968	0.212687	0.582719	0.248039	0.519893	-0.460048	0.212755	0.770062	0.0152012	0.589749	0.0946311	0.333872	0.379897	-0.264905	0.49091	0.214671	0.579125	0.590738	0.0939406	-0.377434	0.316626	0.710254	0.0320247	-0.327453	0.389687	0.0125071	0.974524	-0.253431	0.510555	-0.388641	0.301271	-0.386681	0.303929	0.229064	0.55328
CL17602.Contig1_DB	black	0.576435	0.10423	-0.086592	0.824695	0.384103	0.307443	0.458111	0.214939	0.0331712	0.932486	0.414636	0.267161	0.545535	0.128705	0.145224	0.709302	0.281677	0.462771	-0.237372	0.538564	0.910186	0.000654183	0.53724	0.135805	0.607496	0.0827064	-0.104912	0.788226	0.255729	0.506595	0.475833	0.195419	-0.231118	0.549627	0.809573	0.00819075	-0.155408	0.689709	0.320309	0.400717	-0.113038	0.772159	-0.472691	0.198805	-0.0525926	0.893106	0.0640021	0.87006
CL17063.Contig2_DB	black	0.0513851	0.895549	-0.154606	0.691246	0.316025	0.407401	-0.21421	0.579959	-0.451109	0.222935	-0.501551	0.168936	-0.115295	0.767709	0.106746	0.784593	0.285959	0.4557	0.35383	0.350213	-0.595533	0.090636	-0.245649	0.524054	0.0285858	0.941805	0.0314579	0.935967	-0.416737	0.264497	-0.157553	0.685601	-0.0636459	0.870778	-0.195836	0.613577	0.391943	0.296821	-0.45918	0.213731	0.249109	0.518036	-0.0817432	0.834399	0.0770794	0.84375	0.0992454	0.799471
CL4299.Contig2_DB	black	0.614229	0.0784394	-0.0290775	0.940806	0.22354	0.563148	0.350909	0.354485	-0.0693969	0.859192	0.229029	0.553342	0.375255	0.319657	0.18079	0.641583	0.0877606	0.822359	-0.420797	0.25939	0.788893	0.0114981	0.520474	0.150845	0.347035	0.36019	-0.220764	0.568131	0.398207	0.288472	0.600398	0.0873571	-0.315348	0.408462	0.682218	0.0429152	-0.282021	0.462201	0.0569675	0.88426	-0.0864366	0.825006	-0.420621	0.259609	-0.339443	0.371494	0.211167	0.585481
CL13855.Contig1_DB	black	0.390582	0.298651	-0.358189	0.343885	0.337616	0.37424	0.711437	0.03161	0.115531	0.767245	0.406326	0.277834	0.649237	0.0584679	0.291468	0.446672	0.135136	0.728858	-0.410236	0.272785	0.960315	3.94308e-05	0.0920238	0.813848	0.362818	0.337227	0.190337	0.623764	0.485442	0.185269	0.369283	0.328036	0.253611	0.510245	0.468951	0.202877	-0.199591	0.606654	0.63663	0.0652378	-0.259715	0.499757	-0.067002	0.864014	0.236441	0.540205	-0.0940442	0.809821
CL11676.Contig2_DB	black	0.379667	0.313537	-0.275032	0.473836	0.47156	0.200031	0.679971	0.0438788	0.291024	0.447396	0.390142	0.299244	0.430374	0.247551	0.142473	0.714622	0.34523	0.362863	-0.631458	0.0681515	0.877567	0.00187204	0.184317	0.63498	0.202919	0.60054	0.0155398	0.968349	0.171554	0.658971	0.490891	0.179648	0.192377	0.61998	0.46357	0.208816	-0.492729	0.177774	0.545852	0.128439	-0.29612	0.439109	0.0794393	0.839016	0.0528865	0.892511	-0.301494	0.430444
CL16004.Contig1_DB	black	0.50344	0.167076	-0.0497228	0.898914	0.308698	0.418949	0.35978	0.341589	-0.0108026	0.977995	0.257038	0.504346	0.311003	0.4153	-0.0603753	0.877377	-0.000472951	0.999037	-0.229271	0.552912	0.791179	0.0110948	0.466234	0.205863	0.536808	0.136181	-0.17088	0.660246	0.462628	0.209865	0.52506	0.146639	-0.213333	0.581549	0.710975	0.0317716	-0.195113	0.614914	0.214494	0.579445	0.294298	0.442065	-0.498847	0.171617	-0.141373	0.716752	-0.0340554	0.93069
Unigene32935_DB	black	0.49748	0.172982	-0.157029	0.686603	0.224554	0.561332	0.394283	0.293687	-0.229889	0.551812	0.238329	0.536879	0.513145	0.157711	0.380147	0.312874	0.046641	0.905156	-0.0903207	0.817246	0.829607	0.00566752	0.278137	0.468652	0.436924	0.239624	0.245904	0.523609	0.748253	0.0203961	0.570771	0.108485	-0.136208	0.726774	0.764583	0.0164117	0.195337	0.614501	0.330567	0.384923	0.270809	0.480926	-0.654982	0.0555369	-0.00975247	0.980134	0.25835	0.502094
CL28489.Contig1_DB	black	0.247634	0.520598	-0.424516	0.254758	0.312466	0.412992	0.7126	0.0312054	0.0917673	0.81436	0.248204	0.519607	0.442605	0.232862	0.296215	0.438955	0.00111451	0.99773	-0.496228	0.174238	0.857109	0.00314868	-0.167483	0.666682	0.0843435	0.829192	0.386038	0.304803	0.739146	0.0228734	0.499761	0.170708	0.440245	0.235659	0.331422	0.383619	-0.186591	0.630737	0.686841	0.0409765	0.0977718	0.802401	0.00779662	0.984118	0.230579	0.550586	-0.227902	0.555351
CL28913.Contig1_DB	black	-0.498631	0.171832	0.184455	0.634723	-0.329472	0.386594	-0.552645	0.122799	-0.0412732	0.916038	-0.245836	0.523728	-0.494716	0.175761	-0.386004	0.304849	-0.630823	0.0685149	0.337896	0.373819	-0.816799	0.00720758	-0.299761	0.43323	-0.260003	0.499265	-0.393365	0.294915	-0.27758	0.46958	-0.425809	0.253158	0.0564709	0.885264	-0.763724	0.0166071	-0.00547686	0.988843	-0.434201	0.242903	0.167859	0.665969	0.346257	0.36134	0.047136	0.904153	-0.0283527	0.942279
Unigene45012_DB	black	-0.00555243	0.988689	-0.193117	0.618608	0.199206	0.607362	-0.13903	0.721293	-0.246977	0.521742	-0.649505	0.0583291	-0.299062	0.434355	-0.173974	0.654401	0.140647	0.718157	-0.00964784	0.980347	-0.720154	0.0286608	-0.341126	0.368975	-0.200774	0.604477	-0.220649	0.568338	-0.575916	0.104615	-0.354227	0.349634	0.102744	0.792523	-0.586492	0.0969267	-0.0739464	0.850042	-0.582876	0.0995155	-0.0280057	0.942984	0.43668	0.239917	-0.0629195	0.872244	-0.135944	0.727287
CL4743.Contig8_DB	black	0.0831767	0.831528	-0.430774	0.247063	0.486913	0.183741	0.594432	0.0913886	0.127723	0.743316	0.326384	0.391328	0.390915	0.298203	-0.0751518	0.847621	-0.253527	0.510389	-0.164493	0.672362	0.685466	0.0415472	-0.211526	0.584829	0.432593	0.24485	0.0702503	0.857474	0.514281	0.156635	0.297021	0.437651	0.508823	0.161844	0.161381	0.678289	-0.179089	0.644774	0.694074	0.0380578	0.347632	0.359307	0.0339819	0.930839	0.538832	0.134425	-0.467314	0.204674
CL709.Contig1_DB	black	0.212192	0.583618	-0.22253	0.564958	0.608079	0.0823314	0.460948	0.211745	0.143071	0.713464	0.330685	0.384742	0.276245	0.471808	-0.104171	0.789695	0.233611	0.545207	-0.0562216	0.885767	0.672895	0.0470028	0.126218	0.746261	0.525171	0.146538	0.126463	0.745781	0.245038	0.525119	0.426384	0.252447	0.15491	0.690664	0.585294	0.0977801	-0.0534011	0.89147	0.583966	0.098731	0.505657	0.164909	-0.326174	0.391651	0.317728	0.404739	-0.45143	0.222565
Unigene31602_DB	black	0.397198	0.289809	-0.374931	0.320108	0.259975	0.499314	0.626022	0.0713002	-0.0537967	0.89067	0.328488	0.3881	0.821837	0.00657168	0.437249	0.239234	0.34669	0.3607	-0.0420306	0.914502	0.788561	0.0115575	0.0701872	0.857602	0.532171	0.140255	0.40553	0.278868	0.309962	0.416946	0.0116472	0.976275	0.187558	0.628935	0.475036	0.196275	0.216313	0.576153	0.574325	0.105803	-0.433519	0.243727	-0.189511	0.6253	0.4029	0.282298	0.123542	0.751501
Unigene32939_DB	black	0.532319	0.140123	-0.0906764	0.816537	0.230851	0.550102	0.491819	0.178701	0.116271	0.765788	0.197229	0.611006	0.308399	0.419423	-0.0111672	0.977253	0.205748	0.595359	-0.489523	0.181049	0.821392	0.00662621	0.43407	0.243061	0.330204	0.385476	-0.0558198	0.88658	0.372463	0.32356	0.437855	0.238509	-0.129036	0.74075	0.63926	0.0637866	-0.354814	0.34878	0.244643	0.52581	-0.0209885	0.957258	-0.253366	0.510668	-0.244463	0.526123	-0.0914816	0.81493
CL2823.Contig10_DB	black	0.469476	0.202302	-0.0986075	0.800739	0.303814	0.426727	0.377724	0.316225	0.0506158	0.897106	0.300839	0.431496	0.431582	0.246079	-0.188256	0.627635	-0.0386872	0.921285	-0.13862	0.722089	0.70564	0.0336764	0.450652	0.223462	0.711673	0.0315276	-0.35699	0.34562	0.18026	0.642576	0.187272	0.629467	-0.144409	0.710877	0.502238	0.168258	-0.25946	0.500194	0.191089	0.622368	-0.0440187	0.910471	-0.277512	0.469694	0.0300852	0.938757	-0.074181	0.849571
CL1133.Contig1_DB	black	0.56346	0.11413	-0.0439642	0.910581	0.385639	0.305346	0.366467	0.332023	-0.035668	0.927415	0.406949	0.277026	0.544894	0.129245	0.103411	0.791201	0.267932	0.485781	-0.0391879	0.920269	0.843644	0.00425604	0.577373	0.103535	0.737694	0.0232861	-0.106942	0.784205	0.230946	0.549934	0.411563	0.271082	-0.306699	0.422124	0.860788	0.00288479	-0.00239525	0.99512	0.279041	0.467147	0.014632	0.970197	-0.61607	0.0772969	-0.00139441	0.997159	0.107125	0.783844
CL19869.Contig1_DB	black	0.0608675	0.876384	0.225512	0.559617	-0.170065	0.661788	-0.0476174	0.903178	0.0880405	0.8218	0.658944	0.053571	0.501639	0.168848	0.371167	0.32538	0.0637722	0.870524	0.259612	0.499934	0.434911	0.242045	0.422814	0.256872	0.338169	0.373407	-0.00735323	0.985021	0.000325029	0.999338	0.0525349	0.893223	-0.29654	0.43843	0.437813	0.238559	0.229394	0.552693	0.285073	0.45716	-0.583248	0.0992474	-0.377879	0.316009	0.134416	0.730259	0.47661	0.194587
CL18212.Contig1_DB	black	-0.59449	0.0913489	0.0768371	0.844237	-0.235973	0.541031	-0.379774	0.313388	0.175105	0.652269	-0.295423	0.440239	-0.55368	0.121953	-0.349907	0.355957	-0.214213	0.579953	0.117298	0.763766	-0.869008	0.00235098	-0.473158	0.1983	-0.52188	0.149548	-0.131016	0.736886	-0.54571	0.128558	-0.532362	0.140085	0.28814	0.452116	-0.87451	0.00203448	-0.125116	0.748418	-0.259403	0.500291	-0.0653307	0.867382	0.684692	0.0418707	0.10883	0.780469	-0.301917	0.429766
CL19965.Contig2_DB	black	0.529824	0.142344	-0.190888	0.622741	0.255888	0.506322	0.45937	0.213518	-0.172926	0.656379	0.385889	0.305007	0.750541	0.0198029	0.382844	0.309165	0.170654	0.660673	0.0392772	0.920088	0.888833	0.00135069	0.354463	0.34929	0.684032	0.0421477	0.189166	0.625941	0.50091	0.169569	0.310715	0.415755	-0.131625	0.735697	0.764223	0.0164933	0.240669	0.532766	0.41173	0.270868	-0.0995273	0.798911	-0.592459	0.0927457	0.178836	0.645248	0.291324	0.446906
Unigene38110_DB	black	0.207383	0.592373	-0.451084	0.222964	0.375405	0.319447	0.657598	0.0542335	0.101834	0.794329	0.41621	0.265164	0.657735	0.0541658	0.0899277	0.818031	-0.210747	0.586243	-0.192699	0.619382	0.78204	0.012766	-0.112273	0.773669	0.526213	0.145593	-0.0024506	0.995008	0.413342	0.268809	0.124445	0.749732	0.448057	0.22647	0.138975	0.721399	-0.18839	0.627384	0.654366	0.0558466	-0.189433	0.625445	0.112768	0.772691	0.543724	0.130236	-0.223064	0.564001
CL152.Contig2_DB	black	0.485292	0.185424	-0.124827	0.748983	0.280034	0.465497	0.33517	0.37793	-0.237655	0.538065	0.271945	0.479015	0.467467	0.204505	0.425204	0.253905	0.0211389	0.956952	-0.137202	0.724842	0.793293	0.0107305	0.290859	0.447665	0.365644	0.333193	0.134471	0.730153	0.689571	0.0398586	0.706218	0.0334664	-0.180003	0.643059	0.747271	0.0206543	0.125096	0.748456	0.270595	0.481286	0.26014	0.499031	-0.650028	0.0580588	-0.0624773	0.873136	0.289817	0.449369
CL5161.Contig3_DB	black	0.207021	0.593033	-0.449302	0.225024	0.368595	0.329007	0.718489	0.0292096	0.206758	0.593515	0.387579	0.30271	0.610821	0.0805817	0.00662112	0.986512	-0.0704612	0.85705	-0.275349	0.473307	0.796183	0.0102456	-0.0944859	0.808941	0.48843	0.182174	0.0611457	0.875822	0.337884	0.373837	0.0535866	0.891095	0.480759	0.190177	0.152352	0.695572	-0.259751	0.499696	0.697986	0.0365368	-0.230781	0.550226	0.195551	0.614104	0.510575	0.160161	-0.346954	0.36031
Unigene30418_DB	black	0.508704	0.161958	-0.238253	0.537011	0.177594	0.647583	0.441805	0.233808	-0.270387	0.481636	0.332866	0.381423	0.755728	0.0185009	0.566481	0.111777	0.00584698	0.988089	-0.0633061	0.871464	0.842887	0.00432517	0.219144	0.571045	0.483264	0.187542	0.193703	0.617522	0.647396	0.0594274	0.410897	0.271936	-0.0735086	0.850922	0.615992	0.0773449	0.220632	0.568368	0.345147	0.362986	-0.181274	0.640674	-0.505733	0.164836	0.130842	0.737223	0.441161	0.234571
CL586.Contig1_DB	black	0.320105	0.401035	-0.311082	0.415175	0.397999	0.288747	0.56277	0.114672	-0.0563414	0.885526	0.363917	0.335656	0.563364	0.114205	0.416507	0.264788	0.174932	0.652595	-0.134203	0.730675	0.871715	0.0021913	0.0366767	0.925366	0.362051	0.338325	0.435807	0.240966	0.656137	0.054959	0.547903	0.12672	0.179321	0.644338	0.650503	0.0578137	0.162245	0.676642	0.659419	0.0533378	0.225418	0.559785	-0.422089	0.257776	0.289653	0.449637	-0.0178049	0.963738
CL8201.Contig2_DB	black	0.444508	0.23062	-0.115211	0.767874	0.253907	0.509734	0.429011	0.249218	-0.0382571	0.922158	0.138451	0.722417	0.227032	0.556902	0.236355	0.540358	0.183947	0.635673	-0.410187	0.272848	0.781529	0.0128642	0.254831	0.508141	0.127494	0.743765	0.25352	0.510402	0.674031	0.0464919	0.714883	0.0304214	-0.0812672	0.835352	0.720591	0.0285179	-0.0974584	0.803024	0.317661	0.404842	0.369701	0.327445	-0.460433	0.212322	-0.224142	0.56207	-0.00662438	0.986505
CL14528.Contig4_DB	black	-0.274663	0.474454	0.28737	0.45338	-0.420099	0.260264	-0.660026	0.0530416	-0.288931	0.450819	-0.271343	0.480026	-0.218719	0.571813	-0.0908206	0.816249	-0.16047	0.680028	0.738836	0.0229611	-0.820099	0.00678648	-0.0244934	0.950127	0.0262074	0.946641	-0.105677	0.78671	-0.430297	0.247645	-0.647281	0.0594879	-0.304119	0.42624	-0.372401	0.323647	0.544278	0.129767	-0.559497	0.117262	-0.0472283	0.903966	-0.116631	0.765077	0.0185012	0.96232	0.414354	0.26752
CL16661.Contig1_DB	black	0.570294	0.108848	-0.0518749	0.894558	0.234877	0.542967	0.448146	0.226367	0.0383117	0.922048	0.246487	0.522594	0.35132	0.353883	0.169986	0.661938	0.255406	0.507151	-0.461506	0.211119	0.867607	0.00243665	0.480846	0.190086	0.292615	0.444802	0.0121261	0.9753	0.446179	0.228662	0.596873	0.0897255	-0.222293	0.565385	0.768841	0.0154656	-0.249756	0.516912	0.238267	0.536987	-0.00325967	0.99336	-0.412198	0.27027	-0.294927	0.441044	0.0635071	0.871058
CL23073.Contig2_DB	black	0.0263747	0.946301	0.287435	0.453273	0.0186515	0.962015	0.0164894	0.966416	0.269784	0.482653	0.762143	0.0169707	0.317095	0.405728	0.01753	0.964297	0.0578664	0.882444	0.272464	0.478142	0.63822	0.0643583	0.543177	0.130701	0.517733	0.153392	0.00941334	0.980825	0.167284	0.667059	0.277234	0.470157	-0.286432	0.454921	0.73034	0.0254506	0.143235	0.713146	0.519227	0.152002	0.0542477	0.889758	-0.598123	0.0888812	0.158775	0.683264	0.0727372	0.852473
Unigene337_DB	black	0.554005	0.121688	-0.120443	0.757583	0.32649	0.391165	0.37633	0.318159	-0.160652	0.67968	0.440936	0.234837	0.704051	0.0342578	0.456697	0.216541	0.221816	0.56624	-0.0657689	0.866499	0.839784	0.00461682	0.43777	0.238611	0.581922	0.100205	-0.00631426	0.987137	0.317603	0.404934	0.473669	0.197747	-0.246437	0.522682	0.759141	0.0176759	0.0999735	0.798024	0.285208	0.456936	-0.251396	0.514072	-0.561505	0.115669	0.0506318	0.897074	0.365243	0.333764
CL11708.Contig2_DB	black	0.50354	0.166978	-0.0898467	0.818193	0.136626	0.725961	0.400042	0.28605	-0.0555419	0.887141	0.113745	0.770764	0.256881	0.504616	0.200362	0.605236	0.0285371	0.941904	-0.493788	0.176699	0.755398	0.018582	0.315989	0.407457	0.128453	0.741889	0.0357303	0.927288	0.635657	0.0657798	0.625639	0.0715255	-0.13969	0.720012	0.59391	0.0917461	-0.238578	0.53644	0.160399	0.680164	0.126675	0.745365	-0.345613	0.362294	-0.326393	0.391314	0.108564	0.780997
Unigene1207_DB	black	0.279366	0.466607	-0.445658	0.229271	0.178973	0.644992	0.607519	0.0826918	-0.11554	0.767227	0.328521	0.388049	0.850406	0.00367136	0.290917	0.447572	-0.0887361	0.82041	0.136364	0.72647	0.755334	0.0185976	-0.0870838	0.823712	0.68099	0.0434402	0.333763	0.380061	0.544268	0.129775	-0.131369	0.736197	0.341822	0.367934	0.280296	0.465062	0.286038	0.45557	0.632346	0.0676453	-0.227833	0.555474	-0.159145	0.682558	0.616889	0.0767922	0.0844523	0.828974
CL15601.Contig1_DB	black	0.335196	0.377891	-0.274063	0.47546	0.409009	0.274364	0.563843	0.11383	0.0428464	0.912847	0.299524	0.433612	0.406089	0.278142	0.521677	0.149735	0.353041	0.351364	-0.501952	0.16854	0.799758	0.00966626	0.0328996	0.933038	-0.0219307	0.955341	0.366123	0.332512	0.477849	0.193264	0.732962	0.0246641	0.157946	0.684849	0.559951	0.116901	-0.128444	0.741906	0.531894	0.140501	-0.0251624	0.948767	-0.188921	0.626397	0.0221857	0.954822	-0.0321211	0.93462
CL11364.Contig1_DB	black	0.395088	0.292614	-0.0634012	0.871272	0.437883	0.238476	0.393858	0.294256	0.205859	0.595157	0.368383	0.329307	0.328268	0.388437	-0.308667	0.418997	0.157491	0.68572	-0.141119	0.717243	0.710707	0.0318655	0.47828	0.192805	0.711679	0.0315254	-0.306226	0.422878	0.0245086	0.950096	0.231483	0.548979	-0.116979	0.764392	0.591631	0.0933197	-0.307653	0.420607	0.315306	0.408529	0.0878501	0.82218	-0.274532	0.474674	0.0733238	0.851294	-0.305682	0.423745
CL17602.Contig3_DB	black	0.544342	0.129712	-0.0850518	0.827775	0.368257	0.329486	0.414201	0.267714	-0.0299812	0.938969	0.427964	0.250502	0.616728	0.076891	0.354291	0.349541	0.458589	0.214399	-0.12139	0.755723	0.844093	0.00421539	0.493261	0.177234	0.550889	0.124242	0.0823265	0.83323	0.181476	0.640296	0.439231	0.236865	-0.25046	0.515692	0.843349	0.0042829	0.0499158	0.898523	0.342883	0.366352	-0.224867	0.560771	-0.533641	0.138956	0.00733785	0.985052	0.198856	0.608007
CL3696.Contig2_DB	black	0.383306	0.308533	-0.0986719	0.800611	0.225356	0.559896	0.391704	0.297142	0.00918271	0.981294	0.106026	0.786019	0.132971	0.733073	0.0134899	0.972523	0.0054379	0.988922	-0.379303	0.314039	0.713613	0.0308558	0.240268	0.533469	0.189166	0.625941	0.110245	0.777673	0.665209	0.0505533	0.615476	0.0776646	-0.0443915	0.909715	0.605195	0.0841971	-0.187388	0.629252	0.280996	0.4639	0.483393	0.187407	-0.385923	0.304959	-0.199752	0.606357	-0.130009	0.738851
CL8196.Contig3_DB	black	0.257895	0.502875	-0.351429	0.353722	0.459103	0.213818	0.664271	0.050998	0.155643	0.689257	0.495643	0.174826	0.634911	0.0661973	0.157012	0.686637	0.169323	0.663193	-0.123628	0.751333	0.913892	0.000566582	0.0575061	0.883172	0.563646	0.113985	0.267302	0.486846	0.408829	0.274596	0.283729	0.459376	0.305462	0.424095	0.530247	0.141966	-0.0155509	0.968326	0.793104	0.0107627	0.0150252	0.969397	-0.190034	0.624328	0.482447	0.188399	-0.260907	0.497719
CL10491.Contig6_DB	black	-0.455193	0.218251	0.0899398	0.818007	-0.526453	0.145375	-0.406192	0.278008	-0.122419	0.753703	-0.500085	0.170386	-0.498004	0.172458	-0.18742	0.629191	-0.378475	0.315184	0.272497	0.478087	-0.774035	0.0143619	-0.458506	0.214492	-0.488888	0.181703	0.221281	0.567202	0.0569568	0.884282	-0.514271	0.156645	0.171152	0.659731	-0.663687	0.0512761	0.265791	0.489406	-0.323755	0.395378	0.286599	0.454647	0.288708	0.451186	-0.0254685	0.948144	0.0162244	0.966955
CL16226.Contig3_DB	black	0.187122	0.629747	-0.354704	0.348939	0.579015	0.102325	0.652318	0.0568842	0.286813	0.454295	0.52143	0.149963	0.515379	0.1556	0.0486879	0.901009	0.154762	0.690946	-0.300829	0.431512	0.814552	0.00750414	0.0168046	0.965774	0.438756	0.237432	0.0168544	0.965673	0.153084	0.694165	0.337759	0.374025	0.36832	0.329396	0.343901	0.364836	-0.308801	0.418785	0.735563	0.0239002	-0.116388	0.765558	0.0699242	0.858131	0.453684	0.219976	-0.425034	0.254115
CL8957.Contig2_DB	black	0.492037	0.178478	-0.180844	0.641481	0.276672	0.471096	0.422572	0.257173	-0.160782	0.679431	0.431546	0.246122	0.788033	0.0116523	0.391854	0.296941	0.220707	0.568234	0.127291	0.744161	0.831046	0.00550989	0.356215	0.346744	0.731882	0.0249862	0.162594	0.675977	0.357084	0.345484	0.22489	0.56073	-0.138277	0.722755	0.730583	0.025377	0.283641	0.459522	0.412909	0.269361	-0.202883	0.600606	-0.569381	0.109545	0.254232	0.509174	0.305534	0.423981
CL27926.Contig2_DB	black	0.115569	0.767169	-0.388984	0.300808	0.461575	0.211042	0.562168	0.115146	0.0274402	0.944134	0.272969	0.477295	0.357285	0.345193	0.369169	0.328196	0.110811	0.776555	-0.261098	0.497394	0.687472	0.0407164	-0.242714	0.529182	0.0714149	0.855132	0.478583	0.192483	0.614514	0.0782615	0.595671	0.0905418	0.416326	0.265017	0.375343	0.319533	0.0323947	0.934064	0.704965	0.0339226	0.349741	0.3562	-0.145768	0.708252	0.353444	0.350777	-0.245725	0.523921
CL23767.Contig1_DB	black	0.209135	0.589178	-0.446867	0.227858	0.326977	0.390416	0.694045	0.0380695	0.0385793	0.921504	0.393165	0.295182	0.639037	0.0639092	0.369674	0.327483	-0.0350083	0.928755	-0.229934	0.551731	0.888971	0.00134501	-0.171095	0.659839	0.311689	0.414218	0.422735	0.25697	0.713878	0.030765	0.367917	0.329967	0.450161	0.22403	0.363372	0.336434	0.0298226	0.939291	0.795873	0.0102968	0.025331	0.948424	-0.0992298	0.799502	0.469447	0.202334	-0.128626	0.741552
CL237.Contig4_DB	black	0.268119	0.485464	-0.182628	0.638139	0.368008	0.329838	0.493985	0.1765	0.232298	0.547533	0.274227	0.475183	0.285707	0.456114	-0.364514	0.334803	0.0415331	0.915511	-0.136853	0.72552	0.694745	0.0377943	0.235051	0.542659	0.627119	0.0706578	-0.0651164	0.867814	0.24909	0.518067	0.117769	0.762839	0.136133	0.726919	0.448406	0.226065	-0.241032	0.53213	0.48171	0.189174	0.278307	0.468369	-0.152534	0.695223	0.222921	0.564257	-0.46698	0.205041
CL20521.Contig4_DB	black	0.382499	0.309639	-0.154616	0.691227	0.295954	0.439379	0.53747	0.135605	0.231692	0.548609	0.185989	0.63186	0.140262	0.718905	0.108122	0.78187	0.192866	0.619073	-0.810871	0.00800782	0.752703	0.019253	0.199111	0.607538	-0.105062	0.787928	-0.0233366	0.952481	0.369306	0.328002	0.681912	0.0430459	0.0765618	0.844789	0.42363	0.255857	-0.601753	0.0864577	0.308808	0.418775	-0.0650391	0.86797	0.0488266	0.900729	-0.296288	0.438837	-0.232713	0.546798
CL26340.Contig1_DB	black	0.394829	0.292959	-0.264544	0.491524	0.148513	0.702958	0.490991	0.179545	-0.0737059	0.850526	0.252804	0.511637	0.50485	0.165697	0.388871	0.300961	-0.176757	0.649157	-0.46716	0.204843	0.75762	0.0180405	0.0731496	0.851644	0.134073	0.730927	-0.0118455	0.975871	0.610548	0.0807548	0.49286	0.177641	0.110181	0.7778	0.293419	0.443493	-0.24191	0.53059	0.295413	0.440255	-0.253358	0.510681	-0.0746201	0.848689	-0.0174984	0.964362	0.190396	0.623655
CL15360.Contig1_DB	black	0.104359	0.789321	-0.438146	0.238161	0.36361	0.336094	0.696902	0.0369542	0.171029	0.659964	0.230156	0.551337	0.319169	0.402491	0.20721	0.592688	0.0306463	0.937617	-0.461165	0.211501	0.759137	0.0176767	-0.288196	0.452025	0.00687942	0.985986	0.471309	0.200304	0.686719	0.0410268	0.476807	0.194377	0.556537	0.119636	0.254278	0.509094	-0.178299	0.646257	0.773514	0.0144702	0.26289	0.494337	0.083666	0.830548	0.322661	0.39707	-0.41279	0.269513
Unigene5920_DB	black	0.059709	0.878723	0.215787	0.577105	-0.21765	0.57374	0.0172662	0.964834	0.0551504	0.887933	0.493896	0.17659	0.227128	0.556731	0.396434	0.290824	-0.100359	0.797258	-0.0243648	0.950389	0.569082	0.109774	0.304492	0.425643	-0.00508683	0.989637	0.246374	0.522791	0.596074	0.0902674	0.514353	0.156567	-0.219038	0.571237	0.569682	0.109315	0.159302	0.682258	0.357349	0.3451	0.0431245	0.912283	-0.515409	0.155572	-0.115723	0.766867	0.36081	0.340107
CL4156.Contig3_DB	black	0.0990498	0.79986	-0.306541	0.422376	0.569068	0.109785	0.491473	0.179053	0.140993	0.717488	0.27461	0.474542	0.323146	0.396319	0.0708618	0.856244	0.433084	0.244255	0.00557179	0.98865	0.543708	0.13025	-0.075804	0.846311	0.372654	0.323293	0.419636	0.260845	0.142747	0.714091	0.250222	0.516104	0.307901	0.420213	0.457595	0.215522	0.120396	0.757674	0.675799	0.0457039	0.333249	0.380841	-0.187193	0.629614	0.462979	0.209475	-0.439986	0.235967
Unigene5389_DB	black	0.528481	0.143547	-0.16965	0.662574	0.228181	0.554852	0.515437	0.155545	-0.00502018	0.989773	0.403717	0.28123	0.661056	0.0525409	0.380512	0.31237	0.221478	0.566847	-0.311222	0.414955	0.902403	0.000868199	0.367757	0.330194	0.422305	0.257506	0.0511859	0.895952	0.364781	0.334422	0.395271	0.29237	-0.0961559	0.805616	0.639639	0.0635794	-0.106866	0.784355	0.369536	0.327678	-0.400631	0.285275	-0.306123	0.423041	-0.000661505	0.998652	0.219467	0.570464
CL16852.Contig1_DB	black	0.0846654	0.828548	0.194494	0.616059	-0.0860967	0.825685	0.146899	0.70607	0.343342	0.365667	0.784671	0.0122687	0.458118	0.214931	-0.00321324	0.993454	-0.134627	0.72985	0.0212322	0.956762	0.696574	0.0370815	0.509087	0.161589	0.486579	0.184087	-0.248619	0.518886	0.0986228	0.800709	0.105774	0.786518	-0.173086	0.656076	0.450036	0.224174	-0.169208	0.663412	0.460732	0.211987	-0.468672	0.203182	-0.223741	0.562787	0.14448	0.710739	0.115013	0.768265
CL28251.Contig1_DB	black	0.317099	0.405721	-0.152407	0.695466	0.205259	0.596254	0.468883	0.202951	0.194373	0.616282	0.13818	0.722944	0.1699	0.662101	-0.296475	0.438535	-0.0903635	0.817161	-0.398749	0.287756	0.65812	0.0539758	0.2173	0.574371	0.346413	0.361109	-0.129243	0.740346	0.393863	0.294249	0.235887	0.541183	0.100819	0.796346	0.337986	0.373683	-0.415953	0.265489	0.304622	0.425435	0.191566	0.621484	-0.0394023	0.919834	-0.0466474	0.905143	-0.349742	0.356199
CL2041.Contig1_DB	black	0.282398	0.461578	-0.19005	0.624299	0.48206	0.188806	0.403801	0.28112	0.0196543	0.959973	0.40252	0.282795	0.5381	0.135058	0.0710034	0.855959	0.337775	0.374001	0.222426	0.565144	0.672456	0.0472008	0.23463	0.543405	0.744068	0.0215113	0.209247	0.588975	0.150049	0.7	0.168443	0.664861	0.0195436	0.960199	0.669292	0.0486464	0.245972	0.523491	0.551588	0.123666	0.19171	0.621217	-0.480248	0.190717	0.422407	0.257379	-0.146646	0.706558
CL1701.Contig2_DB	black	0.261176	0.49726	-0.344335	0.364191	0.352145	0.352675	0.665473	0.0504289	0.191327	0.621927	0.421208	0.258876	0.64549	0.060431	0.0359436	0.926855	0.214228	0.579926	-0.0753297	0.847263	0.835948	0.0049957	0.0802241	0.837443	0.628871	0.0696388	0.262059	0.495753	0.283817	0.459231	0.00367728	0.992509	0.307108	0.421474	0.444077	0.231127	-0.00946497	0.98072	0.737188	0.0234309	-0.1396	0.720187	-0.0893118	0.819261	0.491999	0.178517	-0.282733	0.461022
CL6016.Contig4_DB	black	0.155391	0.689741	-0.435621	0.24119	0.312579	0.412813	0.699558	0.035937	0.184494	0.63465	0.397711	0.289128	0.574523	0.105654	0.0304145	0.938088	-0.178001	0.646818	-0.23886	0.535944	0.827544	0.00589867	-0.13995	0.719508	0.446596	0.228174	0.162505	0.676146	0.537054	0.135966	0.132764	0.733477	0.507725	0.162903	0.186831	0.630289	-0.183925	0.635714	0.763412	0.0166784	-0.0419097	0.914747	0.108884	0.780363	0.522701	0.148794	-0.336955	0.375236
CL7439.Contig4_DB	black	-0.188456	0.627262	0.346991	0.360254	-0.439483	0.236565	-0.552236	0.123134	-0.0377085	0.923272	-0.421375	0.258666	-0.642139	0.062222	-0.195055	0.615022	-0.234443	0.543735	-0.163398	0.674446	-0.738824	0.0229647	0.0111414	0.977305	-0.639639	0.0635796	-0.413407	0.268726	-0.343385	0.365604	-0.117204	0.76395	-0.28583	0.455913	-0.514856	0.156093	-0.278659	0.467783	-0.757448	0.0180818	-0.122611	0.753327	0.307196	0.421333	-0.609115	0.081668	0.189414	0.625481
CL13646.Contig1_DB	black	0.405311	0.279152	-0.285967	0.455686	0.194401	0.616231	0.620802	0.0744077	0.0987171	0.800521	0.351397	0.35377	0.613055	0.0791733	0.341938	0.367761	0.128737	0.741334	-0.476821	0.194362	0.849734	0.00372676	0.138794	0.721752	0.233768	0.544929	0.097977	0.801993	0.381409	0.311135	0.301672	0.430158	0.160088	0.680756	0.369236	0.328101	-0.261455	0.496784	0.461714	0.210887	-0.504327	0.166207	0.0212672	0.956691	0.0857	0.826478	0.0547345	0.888774
CL1958.Contig1_DB	black	0.182065	0.639193	-0.413596	0.268485	0.103564	0.790898	0.56744	0.111036	-0.0459357	0.906585	0.20578	0.595301	0.612871	0.0792886	0.0270302	0.944968	-0.284933	0.457391	0.078105	0.841692	0.664193	0.0510351	-0.152411	0.695459	0.59241	0.09278	0.285818	0.455932	0.66262	0.0517867	-0.15134	0.697517	0.411678	0.270935	0.162473	0.676207	0.163502	0.674248	0.597162	0.0895298	0.0742497	0.849433	-0.0778891	0.842126	0.546902	0.127557	-0.116134	0.766056
CL972.Contig2_DB	black	0.374151	0.321198	-0.290331	0.448529	0.328584	0.387953	0.58794	0.0959018	0.0143595	0.970752	0.449293	0.225036	0.722296	0.0279649	0.504378	0.166158	0.347917	0.358886	-0.180288	0.642523	0.873764	0.00207557	0.135911	0.72735	0.3847	0.306626	0.354866	0.348704	0.367287	0.33086	0.345443	0.362546	0.123834	0.750929	0.595933	0.0903637	0.0946762	0.808562	0.616258	0.0771806	-0.320029	0.401153	-0.264861	0.490985	0.281448	0.46315	0.106705	0.784674
Unigene1739_DB	black	-0.0509815	0.896366	0.0801663	0.837559	-0.0263647	0.946321	0.186306	0.631268	0.212874	0.58238	0.68958	0.0398547	0.358435	0.34353	0.285397	0.456626	-0.12075	0.756979	0.0382308	0.922212	0.701165	0.0353304	0.186141	0.631576	0.187438	0.629158	0.259225	0.500597	0.535276	0.137519	0.432347	0.245149	0.0287386	0.941495	0.519763	0.151504	0.114799	0.768687	0.675918	0.0456511	0.0513453	0.89563	-0.383302	0.308538	0.234417	0.543781	0.0863847	0.825109
Unigene32169_DB	black	-0.342673	0.366665	0.246798	0.522053	-0.265194	0.49042	-0.583261	0.0992379	-0.212581	0.582912	-0.338105	0.373504	-0.410733	0.272147	-0.154487	0.691474	-0.0166648	0.966059	0.647206	0.0595271	-0.783482	0.0124918	-0.13261	0.733777	-0.115225	0.767848	0.1314	0.736136	-0.298094	0.435918	-0.426994	0.251696	-0.18508	0.633557	-0.255265	0.507394	0.54007	0.133357	-0.395417	0.292176	0.400332	0.285668	-0.170462	0.661036	0.0146936	0.970072	0.13228	0.734419
CL12128.Contig2_DB	black	0.0175396	0.964278	0.0816974	0.83449	-0.179877	0.643295	0.185779	0.63225	0.23319	0.545953	0.692318	0.0387535	0.460513	0.212233	0.0664332	0.86516	-0.437905	0.238449	0.009098	0.981467	0.687151	0.0408484	0.27922	0.466849	0.383059	0.308871	-0.141836	0.715854	0.44046	0.235403	0.131927	0.735108	0.00361637	0.992633	0.28429	0.458451	-0.106789	0.784507	0.50422	0.166313	-0.302167	0.429364	-0.169563	0.662738	0.222474	0.565058	0.151912	0.696417
CL26468.Contig2_DB	black	0.19444	0.616159	-0.392504	0.296068	0.422748	0.256954	0.678728	0.0444177	0.188947	0.626349	0.525577	0.14617	0.681496	0.0432232	0.146987	0.7059	0.0787905	0.840317	-0.121932	0.754659	0.87144	0.00220717	-0.0222584	0.954674	0.556662	0.119535	0.210897	0.585972	0.349356	0.356766	0.16239	0.676366	0.398036	0.288698	0.370017	0.326999	-0.0612833	0.875545	0.814556	0.00750356	-0.14983	0.700422	-0.0340619	0.930677	0.576579	0.104123	-0.270026	0.482244
Unigene2356_DB	black	0.0870515	0.823776	-0.390797	0.298362	0.441038	0.234716	0.718733	0.0291289	0.441524	0.23414	0.239155	0.535426	0.269229	0.483589	-0.0242358	0.950651	0.441799	0.233815	-0.559583	0.117194	0.599704	0.0878209	-0.167609	0.666444	0.027246	0.944529	0.287698	0.452842	0.00195861	0.99601	0.126076	0.746538	0.538764	0.134483	0.122591	0.753366	-0.435586	0.241232	0.700136	0.0357181	-0.241133	0.531951	0.434698	0.242302	0.306788	0.421983	-0.643186	0.0616588
Unigene42330_DB	black	0.220598	0.56843	-0.294543	0.441666	0.329408	0.386692	0.575912	0.104618	0.0645529	0.86895	0.302965	0.428085	0.443473	0.231838	0.193333	0.618208	0.197947	0.609681	-0.0923037	0.81329	0.811535	0.00791528	-0.0032337	0.993412	0.369588	0.327605	0.534071	0.138577	0.637202	0.0649208	0.360036	0.34122	0.265662	0.489626	0.599786	0.0877658	0.159428	0.682018	0.734173	0.0243064	0.36353	0.336208	-0.345469	0.362507	0.336217	0.376348	-0.227673	0.555759
CL1572.Contig1_DB	black	-0.221529	0.566755	0.196839	0.611725	-0.535717	0.137133	-0.504949	0.1656	-0.29242	0.445119	-0.4716	0.199987	-0.413422	0.268707	0.21846	0.572279	-0.238012	0.537436	0.0684429	0.861112	-0.720719	0.0284762	-0.241356	0.531561	-0.675766	0.0457187	0.0663009	0.865427	-0.00103701	0.997887	-0.160489	0.679991	-0.15052	0.699093	-0.495215	0.175257	0.202134	0.60198	-0.605435	0.0840409	-0.0698317	0.858317	0.138934	0.721479	-0.383917	0.307697	0.462311	0.210219
CL1755.Contig1_DB	black	0.268269	0.48521	-0.334007	0.379691	0.325938	0.392014	0.590041	0.0944269	0.0435665	0.911387	0.405191	0.279309	0.536162	0.136744	0.487332	0.183307	0.013273	0.972964	-0.447576	0.227031	0.842564	0.004355	-0.0522172	0.893865	0.0853578	0.827163	0.221682	0.56648	0.584965	0.0980148	0.611075	0.0804209	0.279133	0.466994	0.371295	0.3252	-0.172458	0.657263	0.595943	0.0903567	-0.156761	0.687116	-0.0657435	0.86655	0.192785	0.619222	0.00903508	0.981595
CL11105.Contig2_DB	black	0.170686	0.660612	-0.38531	0.305794	0.0478529	0.902701	0.579336	0.10209	-0.0130969	0.973323	-0.0812478	0.835391	0.233741	0.544976	0.407914	0.275778	0.1114	0.775392	-0.519544	0.151707	0.538763	0.134484	-0.327171	0.390119	-0.295932	0.439415	0.664554	0.0508637	0.756924	0.0182089	0.342237	0.367315	0.436282	0.240395	0.153241	0.693865	-0.0331696	0.932489	0.474248	0.197123	0.0869471	0.823985	0.101622	0.794751	0.0364675	0.925791	-0.100569	0.796841
CL15610.Contig2_DB	black	0.352926	0.351532	-0.266091	0.488898	0.299948	0.432928	0.590659	0.0939957	0.0792681	0.83936	0.365953	0.332754	0.641147	0.0627584	0.375823	0.318864	0.505524	0.165039	-0.143195	0.713225	0.808545	0.00833758	0.153266	0.693816	0.394224	0.293767	0.460511	0.212235	0.270882	0.480802	0.193384	0.618114	0.126103	0.746485	0.616972	0.0767407	0.130168	0.73854	0.622331	0.0734894	-0.264027	0.492402	-0.246822	0.522012	0.268629	0.484602	-0.0135803	0.972339
CL16883.Contig1_DB	black	0.414597	0.26721	-0.0198366	0.959602	0.366456	0.332038	0.442495	0.232991	0.217855	0.57337	0.271492	0.479775	0.158841	0.683139	-0.0199359	0.9594	0.429187	0.249002	-0.429884	0.248149	0.803456	0.00909083	0.433872	0.243301	0.248204	0.519607	0.121001	0.756487	0.307297	0.421173	0.614943	0.0779953	-0.133376	0.732285	0.807596	0.00847477	-0.274655	0.474468	0.391786	0.297032	0.271873	0.479135	-0.383607	0.308121	-0.214182	0.58001	-0.264141	0.492208
CL9378.Contig2_DB	black	0.168187	0.665346	-0.407837	0.275877	0.181116	0.640971	0.628786	0.0696882	0.0427162	0.913111	0.29494	0.441022	0.605486	0.0840078	0.0601122	0.877909	-0.154884	0.690714	0.0156114	0.968203	0.771432	0.0149082	-0.132043	0.734881	0.555076	0.120817	0.38571	0.30525	0.677282	0.0450497	-0.0219304	0.955342	0.436498	0.240135	0.286239	0.455239	0.140085	0.719248	0.737788	0.023259	0.133192	0.732643	-0.114948	0.768393	0.557489	0.118869	-0.207454	0.592243
CL18082.Contig2_DB	black	-0.120724	0.757031	-0.24708	0.521561	-0.0400747	0.91847	-0.210338	0.586988	-0.469946	0.201789	-0.744715	0.0213364	-0.26024	0.49886	0.0212994	0.956626	-0.190326	0.623786	0.19987	0.606141	-0.782995	0.0125839	-0.580508	0.101234	-0.289654	0.449636	0.0721061	0.853742	-0.103218	0.791585	-0.388052	0.302069	0.212671	0.582749	-0.687506	0.0407024	0.275388	0.47324	-0.536889	0.136111	0.223074	0.563983	0.299877	0.433044	0.0543491	0.889553	0.0869452	0.823989
CL14066.Contig1_DB	black	0.12484	0.748958	-0.399354	0.286957	0.368828	0.328677	0.554466	0.121312	0.00289209	0.994108	0.422511	0.257249	0.543042	0.130815	0.324185	0.394714	-0.243483	0.527836	-0.177403	0.647941	0.766553	0.0159693	-0.199913	0.606062	0.286124	0.455428	0.207256	0.592605	0.672191	0.0473208	0.46859	0.203273	0.420625	0.259605	0.250642	0.515377	-0.0272406	0.94454	0.695104	0.0376535	0.130388	0.738111	-0.093982	0.809945	0.473526	0.197902	-0.113081	0.772073
Unigene42061_DB	black	0.391814	0.296995	-0.209154	0.589143	0.227875	0.555399	0.408188	0.275424	-0.218744	0.571767	0.363863	0.335732	0.696333	0.0371747	0.557624	0.118761	0.200375	0.605212	0.108622	0.780882	0.79372	0.0106578	0.177293	0.648149	0.490662	0.179881	0.437971	0.23837	0.597769	0.0891198	0.381026	0.311662	-0.0404131	0.917783	0.722589	0.0278706	0.41821	0.262638	0.493912	0.176574	0.0265875	0.945868	-0.617092	0.076667	0.251708	0.513531	0.32527	0.393042
Unigene30304_DB	black	-0.0135417	0.972417	0.138609	0.72211	0.00745783	0.984808	0.298248	0.435668	0.576369	0.104279	0.687181	0.0408361	0.136897	0.725434	-0.23237	0.547407	-0.172824	0.656571	-0.388862	0.300972	0.754389	0.0188312	0.356903	0.345747	0.164057	0.673191	-0.205309	0.596163	0.256155	0.505862	0.356674	0.346078	0.0585354	0.881093	0.365309	0.33367	-0.548937	0.125859	0.597397	0.0893707	-0.125179	0.748294	0.0253881	0.948308	0.0140314	0.97142	-0.330349	0.385254
CL16444.Contig1_DB	black	0.135678	0.727804	-0.303079	0.427903	0.539388	0.133945	0.592749	0.0925456	0.353005	0.351417	0.517479	0.15363	0.405969	0.278297	-0.106368	0.785341	0.00726416	0.985202	-0.35492	0.348626	0.746719	0.0208004	0.0347961	0.929185	0.406536	0.277561	-0.170953	0.660109	0.0989492	0.80006	0.317179	0.405595	0.362462	0.337736	0.228717	0.553897	-0.46739	0.20459	0.660111	0.0530002	-0.110895	0.776388	0.173773	0.65478	0.397496	0.289414	-0.495146	0.175327
CL7662.Contig2_DB	black	0.128771	0.741268	-0.226065	0.558628	0.636598	0.0652559	0.534593	0.138118	0.403332	0.281733	0.47777	0.193349	0.232944	0.546389	-0.135468	0.728213	0.212644	0.582798	-0.418669	0.26206	0.688169	0.0404303	0.0951496	0.807619	0.286591	0.454661	-0.14006	0.719295	-0.0157609	0.967899	0.47848	0.192593	0.277988	0.4689	0.342326	0.367183	-0.509264	0.161419	0.617409	0.0764722	0.0514135	0.895492	0.108425	0.781271	0.263183	0.493838	-0.592308	0.0928508
CL3010.Contig1_DB	black	0.323952	0.395074	-0.242824	0.528989	0.341342	0.368651	0.529263	0.142846	0.108374	0.781372	0.530067	0.142127	0.601631	0.0865384	0.218117	0.572897	-0.101059	0.795868	-0.310678	0.415814	0.872109	0.0021687	0.178366	0.646133	0.430375	0.24755	-0.134911	0.729295	0.379514	0.313747	0.43488	0.242082	0.136065	0.727051	0.398314	0.288331	-0.275077	0.473762	0.516427	0.154615	-0.26426	0.492006	-0.102439	0.79313	0.229447	0.552599	-0.0167304	0.965925
Unigene31670_DB	black	0.242656	0.529282	-0.344105	0.364532	0.306429	0.422555	0.55589	0.120158	0.00596104	0.987857	0.513853	0.15704	0.807638	0.00846859	0.248039	0.519894	0.0127268	0.974077	0.145574	0.708627	0.812021	0.00784801	0.047236	0.90395	0.723623	0.0275394	0.225489	0.559659	0.387512	0.302801	0.0283973	0.942188	0.252695	0.511827	0.421822	0.258109	0.208473	0.590384	0.701875	0.0350645	-0.191249	0.622072	-0.23981	0.534274	0.612886	0.0792794	0.0027852	0.994326
CL29274.Contig1_DB	black	0.446181	0.228659	-0.126213	0.74627	0.132977	0.733062	0.462491	0.210019	0.130617	0.737663	0.246299	0.522921	0.382307	0.309902	0.222754	0.564557	0.143919	0.711824	-0.632011	0.0678362	0.697574	0.0366953	0.293733	0.442983	0.0711882	0.855588	-0.152904	0.694512	0.204268	0.598067	0.382386	0.309793	-0.0406416	0.91732	0.335341	0.377672	-0.478535	0.192534	0.173938	0.654469	-0.5435	0.130426	0.0649868	0.868075	-0.234739	0.543212	0.081476	0.834934
CL20088.Contig1_DB	black	0.223876	0.562545	-0.325391	0.392856	0.415565	0.265981	0.653788	0.0561381	0.212829	0.582462	0.547708	0.126882	0.581363	0.100611	0.228684	0.553958	0.0629264	0.87223	-0.323493	0.395783	0.929025	0.000292448	0.0341493	0.930499	0.359838	0.341506	0.160143	0.680651	0.438023	0.238308	0.438265	0.238019	0.324913	0.393591	0.436547	0.240077	-0.206181	0.594568	0.767726	0.0157097	-0.116492	0.765352	-0.057949	0.882277	0.375717	0.319013	-0.226841	0.557244
Unigene5201_DB	black	0.0273782	0.94426	0.268652	0.484565	0.201056	0.603959	0.0875854	0.822709	0.413423	0.268705	0.669216	0.0486815	0.112173	0.773866	-0.0469463	0.904537	0.34357	0.365328	-0.0126408	0.974252	0.590645	0.0940054	0.513507	0.157368	0.278791	0.467563	0.0202645	0.958732	-0.0351454	0.928476	0.443748	0.231514	-0.234825	0.54306	0.729185	0.025802	-0.102354	0.793298	0.507949	0.162686	0.0980695	0.801809	-0.427033	0.251647	0.0114266	0.976725	-0.185172	0.633384
CL16983.Contig1_DB	black	0.622281	0.0735192	0.0783271	0.841247	0.128848	0.741118	0.264455	0.491675	-0.0987439	0.800468	0.268814	0.48429	0.441944	0.233643	0.311929	0.413839	0.374027	0.32137	-0.20492	0.596874	0.764144	0.0165112	0.642837	0.0618461	0.403852	0.281054	0.0197085	0.959863	0.302919	0.428159	0.483884	0.186894	-0.470233	0.201475	0.886635	0.0014433	0.0108905	0.977816	0.0795244	0.838846	-0.160049	0.68083	-0.637533	0.0647373	-0.338901	0.372307	0.368582	0.329026
CL19461.Contig2_DB	black	0.276407	0.471537	-0.22427	0.561841	0.295023	0.440888	0.49438	0.1761	0.0388796	0.920895	0.284267	0.458488	0.318767	0.403117	0.487633	0.182996	0.159883	0.681148	-0.524985	0.146708	0.761486	0.0171235	0.00882106	0.982031	-0.112692	0.772842	0.318091	0.404171	0.605353	0.0840941	0.772638	0.0146534	0.154984	0.690521	0.487494	0.18314	-0.167419	0.666802	0.488363	0.182243	0.0565204	0.885164	-0.177084	0.648542	-0.0410456	0.9165	-0.000546108	0.998887
CL13028.Contig4_DB	black	0.154439	0.691566	-0.239788	0.534312	0.174944	0.652572	0.493758	0.17673	0.10083	0.796322	0.0929198	0.812062	0.166403	0.668732	-0.0661364	0.865758	-0.019313	0.960668	-0.210919	0.585932	0.641678	0.0624711	-0.0553184	0.887593	0.203298	0.599845	0.421177	0.258914	0.715531	0.0302013	0.294289	0.442079	0.287841	0.452606	0.404465	0.280254	-0.014783	0.96989	0.561685	0.115527	0.557576	0.118799	-0.200696	0.604622	0.155698	0.689152	-0.354047	0.349897
CL28596.Contig1_DB	black	0.0974295	0.803082	0.0899356	0.818015	-0.208264	0.590765	0.0863874	0.825104	0.0364875	0.925751	0.641181	0.0627399	0.599641	0.0878629	0.218671	0.571898	-0.365544	0.333335	0.237818	0.537779	0.584292	0.0984971	0.327199	0.390075	0.520109	0.151183	-0.127178	0.744381	0.342733	0.366575	-0.00187185	0.996187	-0.135145	0.72884	0.317646	0.404866	0.145477	0.708814	0.35456	0.349149	-0.434865	0.2421	-0.320804	0.399949	0.256693	0.504938	0.414246	0.267657
Unigene44092_DB	black	0.0164521	0.966492	-0.0375357	0.923623	-0.033737	0.931337	-0.372809	0.323075	-0.567253	0.11118	-0.680964	0.0434511	-0.273997	0.47557	-0.00685441	0.986037	-0.0473629	0.903693	0.451732	0.222217	-0.698639	0.036287	-0.236418	0.540245	-0.0368724	0.924969	0.0833949	0.831091	-0.062223	0.873649	-0.253177	0.510993	-0.154506	0.691438	-0.246278	0.522957	0.5155	0.155486	-0.621413	0.07404	0.525081	0.14662	-0.216075	0.576584	-0.0935028	0.8109	0.243623	0.527591
CL16383.Contig1_DB	black	0.115478	0.767349	0.12036	0.757745	-0.129772	0.739312	0.0305104	0.937893	0.001896	0.996138	0.658451	0.0538128	0.603916	0.0850326	0.378883	0.314619	-0.166421	0.668698	0.238709	0.536209	0.524958	0.146732	0.356562	0.346241	0.437684	0.238713	-0.102199	0.793606	0.179562	0.643885	0.0946359	0.808642	-0.218394	0.572397	0.376468	0.317968	0.193764	0.617409	0.298633	0.435047	-0.539357	0.133971	-0.364446	0.3349	0.209671	0.588201	0.504665	0.165877
CL16275.Contig2_DB	black	0.137447	0.724365	-0.189154	0.625964	0.587463	0.0962391	0.466184	0.205919	0.298474	0.435304	0.475584	0.195686	0.33325	0.380839	-0.146049	0.707709	0.30293	0.428141	-0.0576684	0.882844	0.664003	0.0511257	0.162944	0.67531	0.549137	0.125692	0.0419598	0.914646	0.00238258	0.995146	0.274414	0.47487	0.185485	0.6328	0.504524	0.166015	-0.147863	0.704211	0.653811	0.0561266	0.195876	0.613503	-0.162233	0.676664	0.402334	0.283039	-0.500618	0.169858
CL15028.Contig1_DB	black	0.345059	0.363116	-0.085329	0.827221	0.398886	0.287575	0.400558	0.28537	0.0825002	0.832882	0.372324	0.323755	0.269559	0.483032	0.365141	0.33391	0.294226	0.442182	-0.446472	0.228319	0.786607	0.0119113	0.256473	0.505316	0.052741	0.892806	0.152855	0.694607	0.418978	0.261671	0.853447	0.00342735	-0.0636901	0.870689	0.701591	0.035171	-0.194113	0.616764	0.418345	0.262468	0.140045	0.719324	-0.367589	0.330432	-0.13259	0.733815	-0.0242458	0.950631
Unigene177_DB	black	0.396202	0.291131	-0.163084	0.675044	0.300295	0.432371	0.525654	0.1461	0.0865725	0.824734	0.52674	0.145116	0.617846	0.0762046	0.247945	0.520058	0.142789	0.714009	-0.174041	0.654275	0.970005	1.49441e-05	0.324895	0.393619	0.530433	0.1418	0.133741	0.731574	0.472144	0.199397	0.438401	0.237856	-0.000689064	0.998596	0.713435	0.0309173	-0.0372452	0.924212	0.590049	0.094421	-0.0774891	0.842928	-0.400295	0.285716	0.178531	0.645822	0.0235815	0.951982
Unigene39346_DB	black	-0.0795549	0.838784	-0.0555018	0.887222	-0.00885003	0.981972	0.391154	0.297881	0.451952	0.221964	0.742528	0.0219317	0.463731	0.208637	-0.0579629	0.882249	-0.246457	0.522646	-0.0988323	0.800292	0.746045	0.0209794	0.132718	0.733565	0.374258	0.321048	-0.0175088	0.964341	0.288619	0.45133	0.0310816	0.936732	0.27118	0.4803	0.206968	0.593131	-0.237235	0.538805	0.769362	0.0153525	-0.3397	0.37111	0.0852813	0.827316	0.428741	0.249549	-0.212181	0.583639
Unigene39038_DB	black	0.05327	0.891735	0.0684276	0.861143	-0.0399255	0.918772	0.338999	0.37216	0.411367	0.271333	0.609403	0.081484	0.284755	0.457684	0.242295	0.529916	0.150214	0.699682	-0.400527	0.285411	0.746137	0.0209551	0.252927	0.511426	-0.0563252	0.885558	0.197494	0.610517	0.310343	0.416344	0.415449	0.266128	0.0511112	0.896103	0.454488	0.219056	-0.267328	0.486802	0.611359	0.0802411	-0.3473	0.359798	-0.0528863	0.892512	-0.0162695	0.966863	-0.0438345	0.910844
CL2083.Contig2_DB	black	-0.412904	0.269368	0.0938405	0.810227	-0.146354	0.70712	-0.50564	0.164926	-0.160404	0.680153	-0.210611	0.586491	-0.249211	0.517859	-0.169052	0.663706	-0.264396	0.491774	0.572012	0.107544	-0.820151	0.00678002	-0.292401	0.445151	-0.0516304	0.895053	-0.215518	0.577592	-0.512723	0.158112	-0.546523	0.127875	0.0223518	0.954484	-0.621484	0.0739972	0.293337	0.443627	-0.377894	0.315988	-0.00471308	0.990399	0.209967	0.587664	0.249948	0.51658	0.0842106	0.829458
Unigene36687_DB	black	0.0569962	0.884202	0.0727895	0.852368	-0.272955	0.477317	0.104883	0.788283	0.109492	0.779161	0.509535	0.161159	0.538978	0.134299	-0.0678657	0.862275	-0.320747	0.400037	0.34528	0.362788	0.464603	0.207668	0.308436	0.419364	0.653342	0.0563636	-0.103989	0.790055	0.204505	0.597634	-0.36974	0.32739	-0.0695971	0.858789	0.2094	0.588695	0.162924	0.675349	0.337559	0.374326	-0.407747	0.275993	-0.2046	0.597461	0.333857	0.37992	0.226693	0.557507
CL18256.Contig2_DB	black	0.0950766	0.807765	-0.364267	0.335155	0.48182	0.189059	0.691869	0.0389328	0.35988	0.341445	0.515042	0.155917	0.454886	0.218602	0.0746034	0.848722	0.132694	0.733613	-0.382239	0.309995	0.831317	0.00548058	-0.085421	0.827036	0.270298	0.481786	0.184314	0.634986	0.286256	0.455211	0.348613	0.35786	0.48046	0.190494	0.295165	0.440656	-0.319356	0.4022	0.846795	0.00397615	-0.07758	0.842746	0.150887	0.698388	0.454961	0.218516	-0.487097	0.183551
CL2977.Contig1_DB	black	0.193826	0.617295	-0.202632	0.601066	0.491034	0.179502	0.532147	0.140276	0.241398	0.531486	0.519508	0.15174	0.399513	0.286747	0.0253827	0.948319	0.166604	0.668349	-0.16775	0.666175	0.855314	0.00328325	0.157144	0.686385	0.46119	0.211473	0.160153	0.680632	0.362786	0.337272	0.480542	0.190407	0.191692	0.62125	0.60978	0.0812431	-0.125901	0.746881	0.734564	0.0241917	0.261075	0.497434	-0.271077	0.480475	0.326668	0.390891	-0.365071	0.33401
CL12684.Contig1_DB	black	0.292941	0.444271	-0.00701101	0.985718	0.458849	0.214105	0.418135	0.262733	0.400933	0.284877	0.31246	0.413002	-0.0349258	0.928922	-0.14498	0.709774	0.31613	0.407236	-0.717226	0.0296303	0.692363	0.0387356	0.357347	0.345104	0.000378	0.99923	-0.195876	0.613504	0.0829533	0.831975	0.7467	0.0208054	-0.0334246	0.931971	0.540811	0.132721	-0.692985	0.0384885	0.328828	0.38758	0.134247	0.730588	-0.0301379	0.93865	-0.293599	0.443201	-0.46294	0.209518
CL8648.Contig1_DB	black	0.160055	0.680819	-0.220076	0.569368	0.467029	0.204987	0.512385	0.158434	0.219293	0.570778	0.398123	0.288584	0.391333	0.29764	0.0631195	0.87184	0.443276	0.23207	-0.0386498	0.921361	0.700141	0.0357161	0.0964134	0.805103	0.43523	0.241661	0.388945	0.30086	0.186142	0.631573	0.256018	0.506099	0.207658	0.591871	0.593467	0.092051	0.068998	0.859995	0.720488	0.0285516	0.1982	0.609215	-0.253957	0.509648	0.382988	0.308968	-0.37335	0.322317
CL6999.Contig1_DB	black	-0.119968	0.758515	0.394964	0.292779	0.0483555	0.901683	-0.484933	0.185798	0.159378	0.682113	0.0765072	0.844899	-0.317296	0.405414	-0.550912	0.124223	0.0658087	0.866419	0.348535	0.357975	-0.456672	0.216569	0.411705	0.2709	0.281115	0.463702	-0.685806	0.0414056	-0.854816	0.00332128	-0.288525	0.451485	-0.434972	0.241972	-0.0619654	0.874168	-0.151197	0.697791	-0.428382	0.249989	-0.0561959	0.88582	-0.0411974	0.916192	-0.12713	0.744477	-0.105697	0.786669
CL10820.Contig1_DB	black	0.411296	0.271425	-0.0828415	0.832199	0.320609	0.400252	0.47485	0.196475	0.190241	0.623943	0.483582	0.18721	0.404911	0.279673	0.203314	0.599816	0.138374	0.722567	-0.518801	0.152397	0.900695	0.000920951	0.381908	0.31045	0.238788	0.536071	-0.124964	0.748715	0.328306	0.388379	0.658571	0.0537537	-0.0680311	0.861942	0.611297	0.0802801	-0.411565	0.27108	0.406979	0.276987	-0.198129	0.609347	-0.203335	0.599778	-0.113211	0.771818	-0.0299241	0.939085
CL27668.Contig3_DB	black	0.228264	0.554705	0.224856	0.56079	-0.118444	0.761512	0.0748068	0.848314	0.128674	0.741457	0.532129	0.140292	0.436361	0.2403	0.326834	0.390637	0.358685	0.343169	0.0695534	0.858877	0.552358	0.123034	0.542425	0.131341	0.29763	0.436666	0.130552	0.73779	0.0242406	0.950642	0.136374	0.726452	-0.36716	0.33104	0.654379	0.0558399	0.158371	0.684037	0.272616	0.477887	-0.494086	0.176397	-0.445751	0.229162	-0.0695034	0.858978	0.374965	0.320061
CL22874.Contig2_DB	black	0.257096	0.504246	-0.184183	0.635231	0.293698	0.443039	0.278235	0.468489	-0.223975	0.562369	0.373316	0.322365	0.503081	0.167428	0.559175	0.117519	-0.0781157	0.841671	-0.0142423	0.970991	0.64769	0.0592735	0.0507971	0.896739	0.254738	0.508302	0.191085	0.622375	0.606009	0.0836679	0.644903	0.0607423	0.00540354	0.988992	0.509928	0.160781	0.217127	0.574683	0.386813	0.30375	0.153464	0.693436	-0.489469	0.181105	0.190082	0.624239	0.294143	0.442316
CL14245.Contig1_DB	black	0.129752	0.739351	-0.336235	0.376322	0.236939	0.539326	0.622898	0.0731502	0.264857	0.490992	0.374452	0.320777	0.419507	0.261007	-0.102249	0.793507	-0.252132	0.512798	-0.349241	0.356935	0.767052	0.0158586	-0.0678767	0.862253	0.343954	0.364758	0.00751913	0.984683	0.485475	0.185234	0.162055	0.677005	0.441249	0.234466	0.132102	0.734768	-0.359188	0.342443	0.655796	0.0551289	-0.0414241	0.915732	0.180743	0.641671	0.362428	0.337786	-0.381841	0.310542
CL7693.Contig1_DB	black	0.0728003	0.852346	0.113467	0.771312	0.0783652	0.84117	0.17254	0.657107	0.21143	0.585002	0.778313	0.0134933	0.517674	0.153448	0.178847	0.645229	0.0180549	0.963229	0.204443	0.597748	0.726398	0.0266631	0.401479	0.28416	0.537101	0.135926	0.0485773	0.901234	0.227064	0.556845	0.245464	0.524378	-0.127273	0.744196	0.624249	0.0723468	0.137351	0.724553	0.603418	0.0853596	-0.159454	0.681968	-0.463014	0.209435	0.302902	0.428186	0.123957	0.750688
CL1284.Contig33_DB	black	-0.220146	0.569242	-0.203758	0.599002	0.180764	0.641631	-0.166936	0.66772	-0.203386	0.599683	-0.476591	0.194608	-0.363993	0.335548	-0.207782	0.591644	-0.320809	0.399942	0.0264476	0.946153	-0.63845	0.0642317	-0.512655	0.158177	-0.257819	0.503005	-0.248509	0.519077	-0.210255	0.587138	-0.130132	0.738611	0.281936	0.462343	-0.680944	0.0434596	-0.103004	0.792008	-0.36871	0.328844	0.324905	0.393604	0.419694	0.260772	0.103492	0.791041	-0.229954	0.551696
CL19476.Contig1_DB	black	-0.0232241	0.95271	-0.060949	0.87622	-0.111332	0.775526	-0.266102	0.48888	-0.397857	0.288936	-0.735345	0.0239635	-0.337146	0.374948	-0.205449	0.595907	0.01621	0.966984	0.342725	0.366587	-0.685083	0.0417068	-0.263284	0.493667	-0.066595	0.864834	0.150851	0.698456	-0.107212	0.78367	-0.456568	0.216687	-0.0351028	0.928563	-0.326313	0.391436	0.386599	0.304041	-0.537296	0.135756	0.463947	0.208397	-0.0196674	0.959947	-0.0893777	0.819129	0.0290107	0.940941
Unigene41348_DB	black	-0.0134657	0.972572	-0.351704	0.35332	0.279163	0.466945	0.403622	0.281354	-0.0364333	0.925861	0.100672	0.796636	0.142918	0.71376	0.418808	0.261885	-0.126051	0.746587	-0.377545	0.316473	0.421933	0.25797	-0.416669	0.264584	-0.291717	0.446265	0.407783	0.275947	0.670366	0.0481528	0.6262	0.0711956	0.454687	0.218828	0.0658061	0.866424	-0.0577798	0.882619	0.48967	0.180898	0.335457	0.377496	0.0467716	0.904891	0.196302	0.612716	-0.148937	0.702141
Unigene37608_DB	black	0.141977	0.715581	0.0874479	0.822984	-0.193771	0.617397	0.113808	0.77064	0.0587404	0.880679	0.576316	0.104318	0.642908	0.0618083	0.213423	0.581385	-0.034928	0.928918	0.3194	0.402132	0.52724	0.144665	0.378464	0.315199	0.587307	0.096349	0.0221188	0.954958	0.116004	0.766313	-0.214346	0.579713	-0.173778	0.65477	0.38752	0.302789	0.263128	0.493932	0.349345	0.356782	-0.575414	0.104989	-0.323571	0.395662	0.279349	0.466635	0.389938	0.299519
CL1409.Contig4_DB	black	0.312235	0.413356	-0.131889	0.735181	0.352372	0.352342	0.545065	0.129101	0.333674	0.380196	0.438573	0.23765	0.435768	0.241013	-0.0679407	0.862124	0.447521	0.227095	-0.241552	0.531217	0.794083	0.0105964	0.344237	0.364336	0.496452	0.174013	0.097625	0.802693	0.0241415	0.950843	0.148165	0.703629	0.0586744	0.880812	0.594155	0.0915781	-0.221764	0.566333	0.574789	0.105456	-0.200564	0.604865	-0.123784	0.751027	0.170413	0.66113	-0.319531	0.401928
CL162.Contig1_DB	black	0.0496277	0.899107	-0.326158	0.391675	0.503515	0.167003	0.53162	0.140744	0.184048	0.635483	0.528315	0.143697	0.519612	0.151643	0.119111	0.7602	0.110142	0.777877	0.0299389	0.939054	0.713	0.0310672	-0.0789064	0.840085	0.495397	0.175074	0.258637	0.501604	0.278368	0.468267	0.254758	0.508268	0.381707	0.310726	0.381742	0.310679	0.0528062	0.892674	0.818898	0.00693773	0.136128	0.72693	-0.133508	0.732027	0.625773	0.0714467	-0.346713	0.360665
CL11697.Contig1_DB	black	0.315538	0.408165	-0.0553677	0.887494	0.389096	0.300656	0.419207	0.261384	0.181138	0.64093	0.415775	0.265715	0.221775	0.566314	0.181829	0.639636	0.22122	0.567311	-0.446384	0.228422	0.836351	0.00495488	0.304433	0.425738	0.135338	0.728465	0.088907	0.820069	0.437947	0.238398	0.811944	0.00785865	-0.0445282	0.909438	0.716026	0.030034	-0.276351	0.471631	0.478175	0.192917	0.237834	0.537751	-0.354081	0.349847	-0.113801	0.770655	-0.160718	0.679553
CL23496.Contig2_DB	black	0.161325	0.678395	-0.338108	0.3735	0.328945	0.3874	0.579596	0.1019	0.0810463	0.835795	0.485954	0.184737	0.689544	0.0398693	0.321805	0.398396	0.214964	0.578593	0.0665591	0.864906	0.794173	0.0105811	-0.0353722	0.928015	0.507771	0.162858	0.476726	0.194463	0.407865	0.275841	0.137442	0.724375	0.320186	0.400909	0.479437	0.191577	0.243623	0.527592	0.813351	0.00766602	-0.06817	0.861662	-0.229988	0.551635	0.581594	0.100443	-0.105693	0.786678
CL11369.Contig3_DB	black	0.548582	0.126154	0.131689	0.735572	0.0797091	0.838475	0.176382	0.649864	-0.0320167	0.934832	0.167673	0.666321	0.164027	0.673249	0.260003	0.499265	0.174284	0.653816	-0.545456	0.128772	0.611772	0.0799801	0.565022	0.112909	0.0138487	0.971792	-0.233847	0.544789	0.281912	0.462382	0.698474	0.0363501	-0.448268	0.226225	0.632875	0.0673451	-0.359305	0.342275	-0.120495	0.75748	-0.186012	0.631817	-0.369852	0.327233	-0.602157	0.0861901	0.314308	0.410095
CL7096.Contig1_DB	black	0.166644	0.668274	-0.332662	0.381733	0.320809	0.39994	0.630875	0.0684851	0.260463	0.498479	0.525156	0.146552	0.663144	0.0515356	0.0521935	0.893913	0.100515	0.796948	-0.105534	0.786992	0.791333	0.011068	0.0348477	0.929081	0.567747	0.110799	0.129728	0.739398	0.182622	0.63815	-0.0278908	0.943218	0.361269	0.339447	0.286191	0.455319	-0.114649	0.768983	0.74976	0.0200042	-0.344593	0.363808	0.0703575	0.857259	0.550176	0.124831	-0.268861	0.48421
CL17764.Contig2_DB	black	-0.0660806	0.865871	0.0579902	0.882194	0.169025	0.663758	0.380928	0.311798	0.718096	0.02934	0.622678	0.0732812	0.0732157	0.851511	-0.347572	0.359395	0.0998238	0.798322	-0.478916	0.192129	0.631442	0.0681606	0.266405	0.488366	0.109119	0.779899	-0.205336	0.596113	-0.10593	0.786209	0.202019	0.602192	0.191921	0.620825	0.228287	0.554663	-0.685012	0.0417365	0.625481	0.0716185	-0.276555	0.47129	0.295058	0.44083	0.0924543	0.81299	-0.588727	0.095348
CL1006.Contig4_DB	black	0.4306	0.247276	-0.104555	0.788933	0.0470285	0.904371	0.437157	0.239345	-0.0153563	0.968723	0.24176	0.530853	0.542927	0.130913	0.319013	0.402734	0.419424	0.261111	-0.0833206	0.83124	0.749236	0.0201397	0.32486	0.393674	0.386842	0.30371	0.442523	0.232958	0.403825	0.281089	0.139578	0.720229	-0.104594	0.788857	0.707375	0.0330491	0.213973	0.580389	0.404592	0.280089	-0.178362	0.64614	-0.433183	0.244134	0.0174752	0.964409	0.182359	0.638643
Unigene1911_DB	black	0.0537656	0.890733	0.00225633	0.995403	-0.0248978	0.949305	0.281419	0.463199	0.161037	0.678945	0.592786	0.09252	0.483057	0.187759	0.416722	0.264516	0.157539	0.685628	0.0280504	0.942894	0.700893	0.0354327	0.17548	0.651562	0.19574	0.613754	0.438644	0.237566	0.42851	0.249832	0.278589	0.4679	0.034469	0.92985	0.554574	0.121225	0.221639	0.566559	0.661722	0.0522191	-0.178016	0.64679	-0.349956	0.355884	0.240237	0.533525	0.157971	0.684802
CL15937.Contig3_DB	black	0.441388	0.234302	0.0334644	0.93189	0.26546	0.489968	0.211656	0.584591	-0.0458836	0.90669	0.525223	0.146491	0.56922	0.109668	0.0864076	0.825063	-0.00518082	0.989446	0.113873	0.770512	0.740611	0.0224624	0.573839	0.106167	0.782802	0.0126206	-0.300142	0.432617	0.186093	0.631665	0.316497	0.406662	-0.335755	0.377046	0.701984	0.035024	0.0160871	0.967235	0.224604	0.561241	-0.105998	0.786074	-0.581739	0.100338	0.0823358	0.833212	0.233383	0.545611
CL5782.Contig3_DB	black	-0.248348	0.519357	0.131123	0.736677	-0.139558	0.720269	-0.258597	0.501672	0.202198	0.601863	-0.295504	0.440108	-0.412741	0.269575	-0.260162	0.498993	0.294712	0.441392	-0.0867201	0.824439	-0.668941	0.0488086	-0.112321	0.773573	-0.414951	0.26676	-0.174156	0.654059	-0.808463	0.00834936	-0.482534	0.188308	0.00917995	0.9813	-0.529806	0.14236	-0.238443	0.536678	-0.381093	0.311571	-0.440013	0.235934	0.574193	0.105902	-0.170441	0.661077	-0.1901	0.624206
CL23100.Contig1_DB	black	0.25495	0.507937	-0.270303	0.481779	0.243448	0.527898	0.64917	0.0585024	0.212278	0.583462	0.46869	0.203163	0.566791	0.111537	0.292286	0.445337	0.219366	0.570646	-0.331608	0.383336	0.926282	0.000333037	0.0822207	0.833442	0.268924	0.484105	0.375454	0.319378	0.491267	0.179264	0.342026	0.36763	0.263023	0.494111	0.518719	0.152474	-0.0973093	0.803321	0.752238	0.0193704	-0.182047	0.639228	-0.110213	0.777736	0.261983	0.495883	-0.140102	0.719214
Unigene33921_DB	black	0.213495	0.581255	0.192352	0.620025	0.0220471	0.955104	0.135806	0.727554	0.220329	0.568913	0.679863	0.0439252	0.49917	0.171296	0.149863	0.700358	0.242222	0.530043	0.111528	0.775139	0.657041	0.0545093	0.582933	0.0994741	0.52366	0.147916	-0.0627071	0.872672	-0.032996	0.932842	0.12579	0.747097	-0.30998	0.416917	0.656656	0.0547006	0.043521	0.91148	0.384211	0.307295	-0.448412	0.226057	-0.418118	0.262754	0.0852388	0.827401	0.213081	0.582006
CL5588.Contig5_DB	black	0.0540281	0.890202	-0.240608	0.532872	0.353591	0.350562	0.556971	0.119286	0.483993	0.18678	0.150361	0.699399	0.0999361	0.798099	-0.174338	0.653714	0.580027	0.101585	-0.473911	0.197486	0.407547	0.276252	-0.0471799	0.904064	0.0024332	0.995043	0.243792	0.527296	-0.227069	0.556837	-0.0177298	0.963891	0.38261	0.309487	0.131378	0.736179	-0.414084	0.267862	0.534812	0.137926	-0.229651	0.552235	0.406086	0.278145	0.171947	0.658228	-0.659427	0.053334
CL28185.Contig1_DB	black	0.115732	0.766849	0.15114	0.697901	-0.150861	0.698437	-0.0639189	0.870228	-0.14926	0.701519	0.464677	0.207586	0.334418	0.379069	0.379013	0.314439	-0.426662	0.252105	0.124496	0.749631	0.479016	0.192023	0.273787	0.475922	0.205157	0.59644	-0.0773104	0.843287	0.589939	0.0944978	0.472278	0.199252	-0.254361	0.508952	0.408909	0.274493	0.176873	0.64894	0.165929	0.669632	0.0290434	0.940875	-0.534304	0.138372	-0.0211517	0.956926	0.515475	0.15551
CL23029.Contig1_DB	black	-0.261213	0.497197	0.0583889	0.881389	-0.322629	0.397119	-0.466638	0.205418	-0.311155	0.415061	-0.38018	0.312828	-0.162246	0.676639	0.163221	0.674782	-0.117707	0.762961	0.389318	0.300356	-0.829234	0.00570884	-0.314392	0.409962	-0.301098	0.431081	-0.0354955	0.927765	-0.421247	0.258826	-0.539128	0.134169	-0.0429377	0.912662	-0.634498	0.0664292	0.352063	0.352794	-0.537962	0.135178	-0.337241	0.374805	0.249811	0.516817	0.0290031	0.940957	0.396154	0.291195
CL27561.Contig1_DB	black	0.111649	0.774899	-0.281743	0.462661	0.389751	0.299771	0.546236	0.128115	0.247525	0.520787	0.497527	0.172935	0.578228	0.102904	-0.0185431	0.962235	0.24268	0.529241	0.0896106	0.818664	0.697649	0.0366663	0.0545895	0.889067	0.643103	0.0617034	0.239931	0.534061	0.100156	0.797663	-0.0566196	0.884963	0.308997	0.418475	0.39386	0.294253	0.0603385	0.877452	0.766974	0.0158759	-0.0942989	0.809314	-0.0878144	0.822252	0.605516	0.0839879	-0.346155	0.36149
CL13730.Contig2_DB	black	0.225081	0.560388	-0.220245	0.569063	0.325091	0.393317	0.641226	0.0627154	0.41472	0.267054	0.492113	0.1784	0.420824	0.259356	-0.025597	0.947883	0.19358	0.61775	-0.489067	0.181518	0.85838	0.00305571	0.168831	0.664125	0.287991	0.452361	0.0234652	0.952219	0.183295	0.636891	0.272212	0.478565	0.264865	0.490978	0.376629	0.317744	-0.460652	0.212077	0.668009	0.0492407	-0.294622	0.441539	0.137616	0.724038	0.194343	0.616339	-0.388765	0.301104
CL9478.Contig2_DB	black	-0.225857	0.559001	-0.278168	0.468601	-0.078998	0.839901	-0.0877291	0.822422	-0.215129	0.578296	-0.661444	0.0523534	-0.302209	0.429296	-0.0892223	0.819439	-0.190373	0.623698	-0.0438099	0.910894	-0.736178	0.0237218	-0.652569	0.0567563	-0.443673	0.231603	0.028214	0.942561	-0.209522	0.588473	-0.469782	0.201968	0.397659	0.289198	-0.864867	0.00261049	-0.0161627	0.967081	-0.395023	0.292701	-0.0287214	0.941529	0.647399	0.0594259	0.0811221	0.835643	-0.130343	0.738198
CL6672.Contig1_DB	black	0.0727422	0.852463	-0.0133753	0.972756	-0.0851769	0.827525	0.289215	0.450354	0.205509	0.595797	0.678336	0.0445883	0.625894	0.0713753	0.0645108	0.869035	-0.203071	0.600261	0.188705	0.6268	0.721756	0.0281393	0.272638	0.477851	0.616583	0.0769806	0.0317988	0.935275	0.327069	0.390276	-0.0914562	0.814981	0.0495983	0.899166	0.374115	0.321247	0.0930251	0.811852	0.610841	0.080569	-0.346893	0.360399	-0.227967	0.555235	0.416099	0.265305	0.102797	0.792419
CL25246.Contig1_DB	black	0.491016	0.179519	0.0892831	0.819318	0.201111	0.603858	0.27941	0.466534	0.0205253	0.958201	0.40479	0.279831	0.379799	0.313354	0.158955	0.68292	0.246928	0.521826	-0.139582	0.720222	0.83989	0.00460666	0.606126	0.0835923	0.477739	0.193381	0.0231795	0.9528	0.399731	0.286459	0.560203	0.116701	-0.369342	0.327952	0.921204	0.000418362	-0.0135041	0.972494	0.280063	0.465448	0.119335	0.759759	-0.673721	0.0466308	-0.194233	0.616541	0.158801	0.683216
CL5140.Contig2_DB	black	-0.232919	0.546432	0.163721	0.673831	-0.335682	0.377157	-0.458735	0.214234	-0.125027	0.748592	-0.504306	0.166228	-0.564013	0.113698	-0.06743	0.863152	-0.225162	0.560243	-0.142626	0.714325	-0.801872	0.00933451	-0.238704	0.536219	-0.68817	0.0404298	-0.272078	0.47879	-0.319213	0.402423	-0.164653	0.672058	-0.0801808	0.83753	-0.670237	0.0482118	-0.185747	0.632311	-0.687018	0.0409033	-0.128353	0.742085	0.431376	0.246329	-0.42169	0.258273	0.155169	0.690167
CL660.Contig2_DB	black	0.138961	0.721426	-0.129792	0.739273	0.409672	0.27351	0.309662	0.417421	0.0598837	0.87837	0.460139	0.212653	0.415325	0.266286	-0.068381	0.861237	0.0235912	0.951963	0.279474	0.466427	0.638091	0.0644293	0.185969	0.631897	0.725056	0.0270845	0.109724	0.778702	0.307907	0.420204	0.225357	0.559894	0.0631129	0.871854	0.581071	0.100824	0.203255	0.599923	0.58582	0.0974046	0.433531	0.243713	-0.489047	0.181538	0.459224	0.213683	-0.21611	0.576522
CL6685.Contig2_DB	black	0.296097	0.439147	-0.109471	0.779203	0.326049	0.391842	0.331706	0.383186	-0.0170616	0.965251	0.565391	0.112623	0.663096	0.0515587	0.167041	0.667521	0.0870093	0.823861	0.263843	0.492716	0.765349	0.0162388	0.336729	0.375576	0.80316	0.00913601	0.0568948	0.884407	0.273439	0.476505	0.202543	0.60123	-0.0800301	0.837832	0.673656	0.0466602	0.243861	0.527176	0.525354	0.146372	0.00869622	0.982285	-0.550421	0.124629	0.40024	0.285789	0.0936804	0.810546
Unigene35067_DB	black	0.422108	0.257751	0.00274217	0.994414	-0.0118386	0.975885	0.234715	0.543254	-0.163164	0.674892	0.152119	0.696019	0.266314	0.48852	0.409335	0.273944	-0.0186005	0.962118	-0.324881	0.393642	0.661399	0.0523753	0.298958	0.434524	0.0308479	0.937207	0.158405	0.683973	0.715893	0.0300787	0.657485	0.0542897	-0.230701	0.550368	0.613427	0.07894	-0.00497761	0.98986	0.121839	0.754842	0.122374	0.753793	-0.496607	0.173857	-0.33303	0.381173	0.356339	0.346563
CL5834.Contig2_DB	black	0.0385077	0.92165	-0.0521726	0.893956	-0.0817735	0.834338	0.45971	0.213135	0.426474	0.252336	0.532142	0.14028	0.33579	0.376993	0.111263	0.775662	0.0230179	0.953129	-0.398358	0.288272	0.766909	0.0158903	0.130859	0.737191	0.0307299	0.937447	0.237807	0.537797	0.409451	0.273795	0.207368	0.592399	0.22467	0.561124	0.314468	0.409843	-0.285477	0.456493	0.684404	0.0419914	-0.334728	0.3786	0.0892873	0.819309	0.113427	0.771392	-0.163824	0.673634
CL14171.Contig1_DB	black	-0.0484626	0.901466	-0.269783	0.482655	0.584358	0.0984493	0.512258	0.158554	0.451884	0.222042	0.434297	0.242787	0.138036	0.723221	-0.0570296	0.884135	0.185967	0.6319	-0.483617	0.187172	0.530546	0.141699	-0.130849	0.737212	0.0153728	0.968689	-0.0326494	0.933546	-0.0515307	0.895254	0.446326	0.228489	0.450969	0.223096	0.106421	0.785237	-0.533051	0.139476	0.657824	0.0541218	-0.0184671	0.96239	0.334293	0.379258	0.323138	0.396333	-0.647098	0.0595838
CL13901.Contig7_DB	black	0.167762	0.666152	-0.317148	0.405645	0.254393	0.508896	0.512843	0.157998	0.0724178	0.853115	0.525578	0.146169	0.790879	0.0111472	0.221485	0.566835	0.0695182	0.858948	0.172356	0.657456	0.704193	0.0342058	0.0273933	0.94423	0.680299	0.0437372	0.204697	0.597283	0.20305	0.600299	-0.124983	0.748679	0.272095	0.478762	0.309615	0.417496	0.190111	0.624185	0.682606	0.0427505	-0.374244	0.321068	-0.11146	0.775272	0.64619	0.0600614	-0.012286	0.974974
Unigene30295_DB	black	0.441811	0.2338	0.0982113	0.801527	0.0975336	0.802875	0.259036	0.500919	0.0514483	0.895421	0.174154	0.654061	0.088584	0.820714	0.154832	0.690812	0.202064	0.602108	-0.471994	0.19956	0.699104	0.0361097	0.467635	0.20432	0.0304175	0.938082	0.0617863	0.87453	0.504517	0.166022	0.715645	0.0301627	-0.301566	0.430328	0.743205	0.0217461	-0.23516	0.542467	0.136508	0.72619	0.209966	0.587666	-0.462845	0.209624	-0.472158	0.199382	0.0831553	0.831571
Unigene34110_DB	black	0.254694	0.508377	-0.17475	0.652937	0.336757	0.375534	0.520692	0.150644	0.203322	0.5998	0.60669	0.0832266	0.607235	0.082875	0.0757979	0.846323	0.106656	0.784771	-0.0408317	0.916934	0.909182	0.000679446	0.264255	0.492015	0.642453	0.0620527	0.102173	0.793656	0.331876	0.382928	0.25564	0.506748	0.112128	0.773955	0.608995	0.0817444	-0.0353713	0.928017	0.708372	0.0326919	-0.0583403	0.881487	-0.297483	0.436904	0.381181	0.311449	-0.15699	0.686679
CL23263.Contig2_DB	black	0.397375	0.289574	0.0331157	0.932599	0.171368	0.659323	0.286303	0.455134	0.0972306	0.803477	0.424144	0.255219	0.331167	0.384008	-0.0407321	0.917136	-0.171889	0.658338	-0.275511	0.473034	0.775783	0.0140027	0.489719	0.180849	0.4533	0.220415	-0.343656	0.365201	0.385485	0.305557	0.488327	0.18228	-0.213931	0.580464	0.564865	0.113032	-0.332131	0.38254	0.219027	0.571257	-0.000145792	0.999703	-0.346343	0.361212	-0.139448	0.720481	0.0466471	0.905143
CL22997.Contig2_DB	black	0.233193	0.545947	-0.1081	0.781913	0.409973	0.273122	0.375652	0.319103	0.148372	0.70323	0.519932	0.151347	0.331766	0.383095	0.309415	0.417812	0.0474635	0.90349	-0.422044	0.257831	0.752525	0.019298	0.189754	0.624848	0.106104	0.785864	-0.0926531	0.812594	0.315502	0.408221	0.780654	0.0130334	0.0338508	0.931106	0.482291	0.188563	-0.326576	0.391032	0.450348	0.223814	-0.0501396	0.89807	-0.179491	0.644019	0.0245043	0.950105	-0.0462093	0.906031
CL14283.Contig1_DB	black	-0.523951	0.14765	-0.161257	0.678525	-0.169114	0.663589	-0.255022	0.507812	-0.128937	0.740943	-0.354814	0.34878	-0.24509	0.52503	-0.0424678	0.913615	-0.29059	0.448106	0.358497	0.343441	-0.783218	0.0125416	-0.69906	0.0361265	-0.34267	0.36667	0.172318	0.657527	-0.224667	0.561128	-0.572017	0.10754	0.437713	0.238679	-0.846818	0.00397422	0.284234	0.458543	-0.132821	0.733365	0.0454716	0.907525	0.506301	0.164284	0.403571	0.28142	-0.0980833	0.801781
CL10758.Contig1_DB	black	0.157588	0.685534	0.0479674	0.902469	-0.116188	0.76595	0.238281	0.536962	0.0593403	0.879467	0.554045	0.121655	0.535096	0.137677	0.330353	0.385249	0.0278131	0.943376	0.153707	0.69297	0.743871	0.0215647	0.305765	0.423612	0.398944	0.287499	0.363335	0.336487	0.550317	0.124714	0.197356	0.610772	-0.09631	0.805309	0.645993	0.0601654	0.31049	0.416111	0.563797	0.113867	-0.0880311	0.821819	-0.525231	0.146484	0.192131	0.620435	0.272608	0.477901
CL14229.Contig2_DB	black	0.215614	0.577418	0.232699	0.546822	-0.0821825	0.833519	0.0760458	0.845825	0.255481	0.507022	0.517465	0.153642	0.188567	0.627055	-0.110303	0.777558	-0.282887	0.460768	-0.296543	0.438424	0.580065	0.101557	0.550748	0.124358	0.252681	0.51185	-0.532556	0.139914	0.156826	0.686992	0.346454	0.361048	-0.293657	0.443106	0.353799	0.350258	-0.478801	0.192252	0.100962	0.796061	-0.316578	0.406535	-0.14894	0.702135	-0.250426	0.515751	0.119659	0.759122
CL23426.Contig2_DB	black	0.131478	0.735983	0.100032	0.797908	0.114083	0.770098	0.325529	0.392643	0.40709	0.276844	0.607973	0.0823994	0.293282	0.443716	0.169939	0.662027	0.406029	0.278219	-0.278733	0.467659	0.743107	0.0217728	0.388024	0.302107	0.126118	0.746455	0.200549	0.604892	0.113115	0.772007	0.390661	0.298545	-0.0673255	0.863363	0.640328	0.0632037	-0.181568	0.640125	0.591422	0.0934645	-0.261158	0.497292	-0.207738	0.591724	-0.00457175	0.990687	-0.106237	0.785601
Unigene4313_DB	black	0.199078	0.607599	-0.271145	0.48036	0.161893	0.677313	0.512137	0.158669	0.0300856	0.938756	0.455162	0.218287	0.724393	0.0272945	0.21403	0.580286	0.0881583	0.821565	0.210694	0.586341	0.779186	0.0133206	0.0683716	0.861256	0.667141	0.0496452	0.423744	0.255715	0.468227	0.20367	-0.053055	0.89217	0.219088	0.571146	0.493981	0.176504	0.33314	0.381007	0.726909	0.026504	-0.0730286	0.851887	-0.323783	0.395335	0.557479	0.118877	-0.00150953	0.996925
CL24225.Contig1_DB	black	0.324548	0.394155	-0.136857	0.725512	-0.0158868	0.967643	0.485093	0.185632	0.0830584	0.831765	0.193304	0.618261	0.324814	0.393744	0.2726	0.477913	0.101405	0.795182	-0.44983	0.224413	0.769867	0.0152434	0.147626	0.704668	0.0194309	0.960428	0.357916	0.344279	0.675482	0.0458444	0.406269	0.277908	0.0754491	0.847024	0.493231	0.177264	-0.122626	0.753298	0.425086	0.254051	-0.0359855	0.92677	-0.184816	0.634049	-0.128473	0.74185	0.0375012	0.923693
CL6085.Contig2_DB	black	0.295422	0.440241	-0.0972981	0.803343	0.302515	0.428806	0.385616	0.305377	0.204042	0.598482	0.582461	0.0998152	0.540614	0.13289	0.0294508	0.940047	-0.0370981	0.924511	-0.207224	0.592664	0.737585	0.0233173	0.354736	0.348894	0.541544	0.132093	-0.367664	0.330326	0.0340644	0.930672	0.245295	0.524671	-0.018931	0.961446	0.367974	0.329886	-0.346191	0.361438	0.38081	0.31196	-0.438962	0.237186	-0.0672822	0.86345	0.183938	0.635689	-0.0314697	0.935943
CL13632.Contig1_DB	black	-0.126145	0.746404	-0.174376	0.653643	0.133406	0.732226	-0.226711	0.557475	-0.376944	0.317306	-0.190859	0.622796	0.042835	0.912871	0.13623	0.72673	-0.400709	0.285172	0.303144	0.427799	-0.481139	0.189777	-0.366688	0.331709	0.0250024	0.949092	-0.31189	0.4139	-0.186213	0.631441	-0.140643	0.718166	0.114279	0.769712	-0.53145	0.140895	0.169818	0.662257	-0.335871	0.376871	-0.038733	0.921192	0.165114	0.671181	0.267025	0.487316	0.221992	0.565923
CL22.Contig4_DB	black	0.400426	0.285544	-0.0634611	0.871151	0.156156	0.688275	0.464754	0.207501	0.124928	0.748785	0.437117	0.239393	0.523111	0.148419	0.277334	0.46999	0.365398	0.333544	-0.208913	0.589582	0.883586	0.0015789	0.396193	0.291144	0.378436	0.315237	0.280951	0.463975	0.378966	0.314504	0.353546	0.350628	-0.100708	0.796566	0.765344	0.0162397	0.00952352	0.9806	0.511241	0.159524	-0.176772	0.64913	-0.40638	0.277764	0.0121759	0.975199	0.0766664	0.84458
Unigene474_DB	black	-0.159423	0.682027	-0.1716	0.658884	0.147483	0.704943	0.421701	0.25826	0.445664	0.229263	0.675914	0.0456529	0.367921	0.329962	-0.0723253	0.853301	-0.3688	0.328718	-0.225283	0.560026	0.645888	0.0602208	-0.0761597	0.845597	0.229574	0.552373	-0.12021	0.758039	0.265815	0.489366	0.152589	0.695116	0.444316	0.230846	-0.00935505	0.980943	-0.391308	0.297674	0.755268	0.0186138	-0.24635	0.522832	0.285446	0.456544	0.48927	0.18131	-0.356567	0.346233
CL10788.Contig2_DB	black	-0.276316	0.47169	-0.260077	0.499138	0.165621	0.670218	0.515387	0.155593	0.533045	0.139481	0.585934	0.0973239	0.275433	0.473165	-0.124769	0.749097	-0.264167	0.492164	-0.267819	0.485971	0.596524	0.0899623	-0.268211	0.485309	0.096396	0.805138	0.12947	0.739903	0.299141	0.434229	0.0743398	0.849252	0.652283	0.0569018	-0.0942508	0.809409	-0.367169	0.331027	0.907918	0.00071221	-0.109786	0.778579	0.424161	0.255198	0.588771	0.0953169	-0.579427	0.102023
CL23689.Contig1_DB	black	0.308919	0.418598	0.22842	0.554428	-0.111804	0.774594	0.128521	0.741756	0.100302	0.797372	0.428325	0.250059	0.30906	0.418375	0.315849	0.407678	0.335364	0.377637	-0.10325	0.79152	0.662854	0.0516745	0.560774	0.116248	0.177944	0.646925	0.224599	0.561252	0.307456	0.420921	0.390912	0.298207	-0.390348	0.298967	0.797995	0.00994912	0.0973902	0.80316	0.269125	0.483765	-0.176239	0.650133	-0.563936	0.113758	-0.257424	0.503683	0.321752	0.398478
Unigene1392_DB	black	0.277563	0.469609	-0.114352	0.769568	0.324837	0.39371	0.430942	0.246858	0.265335	0.490181	0.575375	0.105018	0.502396	0.168102	0.1348	0.729512	0.110136	0.777888	-0.366241	0.332344	0.735846	0.023818	0.303361	0.427452	0.34584	0.361957	-0.280682	0.46442	-0.0225022	0.954178	0.330083	0.38566	0.0296613	0.939619	0.347933	0.358863	-0.424894	0.254288	0.413654	0.26841	-0.552093	0.123251	0.0416881	0.915197	0.123991	0.750622	-0.0617302	0.874643
CL1917.Contig1_DB	black	-0.102643	0.792725	0.250886	0.514954	-0.284885	0.457469	-0.391026	0.298054	-0.110097	0.777965	-0.550928	0.12421	-0.668178	0.0491623	0.0191572	0.960985	0.190684	0.62312	-0.206398	0.594171	-0.593169	0.0922563	-0.0688174	0.860358	-0.760005	0.017471	0.147318	0.705261	-0.0947365	0.808442	0.1337	0.731654	-0.233275	0.545802	-0.167336	0.66696	-0.0164722	0.966451	-0.555771	0.120254	0.284293	0.458446	0.0442187	0.910065	-0.637074	0.0649913	0.0992757	0.799411
Unigene41769_DB	black	0.267795	0.486013	-0.150222	0.699666	0.0462429	0.905963	0.355217	0.348194	-0.0459207	0.906615	0.259811	0.499593	0.626961	0.07075	0.228333	0.554583	0.377484	0.316557	0.291842	0.446061	0.546017	0.1283	0.194216	0.616574	0.601395	0.0866947	0.473039	0.198428	0.20143	0.603273	-0.239397	0.535	-0.00100555	0.997952	0.527633	0.14431	0.458137	0.214909	0.453635	0.220032	-0.213684	0.580913	-0.383764	0.307906	0.351924	0.352998	0.146665	0.70652
CL17854.Contig2_DB	black	0.357663	0.344646	-0.0457376	0.906986	0.232602	0.546995	0.33546	0.377492	0.0888891	0.820105	0.604021	0.0849638	0.629647	0.0691904	0.105004	0.788044	-0.0297977	0.939342	-0.0139089	0.97167	0.80239	0.00925434	0.452895	0.22088	0.690148	0.0396248	-0.247788	0.52033	0.180869	0.641434	0.237372	0.538565	-0.144536	0.710632	0.558249	0.11826	-0.104106	0.789824	0.38703	0.303455	-0.320375	0.400616	-0.340303	0.370206	0.191999	0.620681	0.132957	0.7331
CL23788.Contig3_DB	black	0.350171	0.355569	0.0175502	0.964256	0.298488	0.435282	0.294047	0.442472	0.0532312	0.891814	0.540684	0.13283	0.400508	0.285436	0.283891	0.459108	0.0861356	0.825607	-0.195946	0.613374	0.841959	0.0044111	0.424981	0.254181	0.348706	0.357723	-0.0252963	0.948494	0.433714	0.243492	0.727397	0.0263525	-0.202497	0.601314	0.768392	0.0155636	-0.090208	0.817471	0.405992	0.278267	0.0924258	0.813047	-0.537986	0.135157	-0.0445705	0.909352	0.123281	0.752012
CL972.Contig4_DB	black	0.154702	0.691063	0.0189342	0.961439	0.0375323	0.923629	0.362119	0.338228	0.377699	0.316258	0.647323	0.0594657	0.494212	0.17627	0.0964554	0.80502	0.15938	0.682108	-0.208679	0.59001	0.726846	0.0265235	0.363053	0.336891	0.335612	0.377262	-0.0483956	0.901601	0.0214618	0.956295	0.0851473	0.827584	0.000258049	0.999474	0.400211	0.285828	-0.249613	0.517161	0.530842	0.141436	-0.619673	0.075091	-0.0124381	0.974664	0.150526	0.699082	-0.019597	0.96009
CL5629.Contig1_DB	black	0.31575	0.407832	-0.118797	0.760816	0.146098	0.707615	0.275556	0.47296	-0.127251	0.744239	0.482718	0.188115	0.787305	0.011784	0.371796	0.324496	0.16798	0.665739	0.334607	0.378783	0.621654	0.0738948	0.294512	0.441717	0.729485	0.0257104	0.137792	0.723696	0.151231	0.697725	-0.0433432	0.91184	-0.117635	0.763103	0.53654	0.136414	0.391981	0.29677	0.388335	0.301685	-0.394923	0.292834	-0.461988	0.21058	0.391633	0.297237	0.362832	0.337206
CL12101.Contig1_DB	black	-0.18087	0.641432	0.122687	0.753179	-0.329695	0.386254	-0.326389	0.391319	0.0110172	0.977558	-0.505364	0.165195	-0.492505	0.178002	-0.284769	0.457661	-0.0964837	0.804963	-0.153834	0.692726	-0.73463	0.0241723	-0.166026	0.669447	-0.496768	0.173695	-0.294664	0.441469	-0.480812	0.190121	-0.446891	0.227829	-0.0269704	0.94509	-0.673181	0.0468739	-0.27347	0.476454	-0.61652	0.0770194	-0.289249	0.450299	0.558816	0.117806	-0.348668	0.357779	-0.0210379	0.957158
CL13408.Contig2_DB	black	0.0756786	0.846563	-0.133115	0.732794	0.537969	0.135171	0.448505	0.225949	0.447767	0.226808	0.556328	0.119804	0.190127	0.624154	-0.0537705	0.890723	0.161646	0.677783	-0.489044	0.181542	0.661668	0.0522449	0.132771	0.733463	0.134538	0.730021	-0.207507	0.592146	-0.0421297	0.914301	0.559708	0.117095	0.218085	0.572955	0.304543	0.425561	-0.582719	0.0996288	0.57585	0.104664	-0.0941669	0.809577	0.148501	0.70298	0.166335	0.668861	-0.490458	0.180091
Unigene4506_DB	black	0.117886	0.762608	0.203666	0.59917	-0.100833	0.796317	-0.470754	0.200907	-0.397438	0.28949	-0.672383	0.0472339	-0.518171	0.152984	0.0821364	0.833611	0.266155	0.48879	0.00621952	0.98733	-0.699302	0.0360343	0.043893	0.910725	-0.458407	0.214604	-0.0659145	0.866205	-0.298371	0.43547	0.0782584	0.841385	-0.440468	0.235394	-0.10119	0.795609	0.146607	0.706633	-0.845083	0.00412662	0.239797	0.534297	-0.152267	0.695736	-0.632376	0.0676284	0.320173	0.400929
CL1810.Contig2_DB	black	0.0989798	0.799999	-0.263866	0.492677	0.291505	0.446612	0.509004	0.16167	0.134122	0.730832	0.560008	0.116856	0.628004	0.0701421	0.131873	0.735214	0.0106023	0.978403	0.155037	0.69042	0.800971	0.00947499	0.0274446	0.944125	0.624601	0.0721377	0.329123	0.387128	0.454709	0.218804	0.118748	0.760914	0.290948	0.447521	0.474364	0.196998	0.200074	0.605765	0.82512	0.00617848	0.0890291	0.819825	-0.27988	0.465753	0.610353	0.0808787	-0.174654	0.653119
CL939.Contig1_DB	black	0.256416	0.505415	-0.156094	0.688394	0.273919	0.475701	0.455979	0.217356	0.084417	0.829045	0.559414	0.117329	0.564484	0.113329	0.459869	0.212956	0.16185	0.677395	-0.205073	0.596594	0.863639	0.00269107	0.175402	0.65171	0.262455	0.495079	0.251381	0.514098	0.461963	0.210608	0.553346	0.122225	0.0678487	0.862309	0.609149	0.0816459	0.00916055	0.98134	0.624027	0.0724781	-0.141252	0.716986	-0.324393	0.394394	0.197113	0.61122	0.0941034	0.809703
Unigene5315_DB	black	0.453527	0.220155	0.0280827	0.942828	0.0734619	0.851016	0.26027	0.498808	-0.0940353	0.809839	0.45659	0.216663	0.634668	0.066334	0.312588	0.4128	0.186205	0.631456	0.133283	0.732465	0.786763	0.0118827	0.525749	0.146014	0.640935	0.0628735	0.119664	0.759113	0.371862	0.324403	0.244772	0.525585	-0.321793	0.398415	0.810237	0.00809674	0.260535	0.498355	0.316495	0.406665	-0.165884	0.669718	-0.669904	0.0483646	0.0465502	0.90534	0.38062	0.312221
Unigene32412_DB	black	0.0468553	0.904722	-0.194357	0.616312	0.28488	0.457478	0.547499	0.127057	0.48833	0.182277	0.401517	0.28411	0.175229	0.652035	-0.371299	0.325195	-0.106897	0.784294	-0.432269	0.245244	0.683284	0.0424632	0.0556966	0.886829	0.277245	0.470138	-0.121615	0.755282	0.220652	0.568332	0.173184	0.655893	0.374855	0.320215	0.157753	0.685219	-0.56884	0.109959	0.632597	0.0675031	0.0401699	0.918277	0.25829	0.502199	0.242424	0.52969	-0.636788	0.0651503
CL19122.Contig2_DB	black	0.305797	0.423561	0.16907	0.663673	-0.0234965	0.952155	0.185891	0.632043	0.135758	0.727649	0.543365	0.130541	0.39073	0.298451	0.39437	0.293572	0.238245	0.537025	-0.233722	0.54501	0.727328	0.0263737	0.516825	0.154241	0.141803	0.715918	0.0593912	0.879364	0.260935	0.497671	0.499227	0.171239	-0.318193	0.404013	0.697962	0.036546	-0.0721708	0.853611	0.303522	0.427194	-0.372992	0.322819	-0.419079	0.261545	-0.208463	0.590403	0.329858	0.386005
CL24185.Contig1_DB	black	0.235959	0.541055	0.196154	0.61299	-0.186902	0.630157	0.0901769	0.817534	0.184167	0.635261	0.378999	0.314459	0.212523	0.583017	-0.213502	0.581242	-0.310302	0.416408	-0.148202	0.703557	0.53077	0.141499	0.51917	0.152054	0.381761	0.310652	-0.411208	0.271537	0.241164	0.531897	0.0984364	0.801079	-0.269075	0.483849	0.332457	0.382044	-0.317772	0.40467	0.0786513	0.840597	-0.219583	0.570256	-0.193025	0.618778	-0.192213	0.620283	0.11683	0.764687
CL17494.Contig2_DB	black	0.095827	0.806271	0.0887802	0.820322	0.0236854	0.951771	0.36581	0.332957	0.546471	0.127918	0.448158	0.226352	0.109956	0.778245	-0.373161	0.322582	0.125147	0.748356	-0.333421	0.38058	0.670117	0.0482668	0.385974	0.30489	0.270549	0.481364	-0.0451469	0.908184	0.114977	0.768335	0.0864387	0.825001	0.0383863	0.921896	0.420071	0.2603	-0.445347	0.229635	0.516914	0.154159	-0.0841952	0.829489	0.0190779	0.961147	-0.0189898	0.961326	-0.437681	0.238718
CL8349.Contig1_DB	black	0.243157	0.528406	0.0829547	0.831972	-0.107212	0.78367	0.185857	0.632105	0.0398513	0.918923	0.606043	0.0836459	0.574275	0.10584	0.202934	0.600512	-0.233213	0.545912	0.0969987	0.803939	0.749843	0.0199827	0.434593	0.24243	0.539846	0.13355	-0.0772872	0.843333	0.456646	0.216598	0.195599	0.614015	-0.199681	0.606488	0.539934	0.133474	0.0809543	0.835979	0.376948	0.317301	-0.261158	0.497292	-0.452682	0.221125	0.119296	0.759836	0.347659	0.359268
CL20541.Contig1_DB	black	-0.152218	0.695829	0.0353947	0.92797	0.152925	0.694471	-0.384035	0.307535	-0.200256	0.60543	-0.3935	0.294734	-0.438571	0.237653	-0.296665	0.438227	-0.23705	0.539132	0.151973	0.696301	-0.689559	0.0398635	-0.187282	0.629449	-0.129877	0.739107	-0.479758	0.191236	-0.425185	0.253929	-0.0823305	0.833222	-0.0623107	0.873472	-0.479624	0.191378	-0.0964748	0.804981	-0.566793	0.111535	0.315411	0.408363	0.182389	0.638586	-0.0899402	0.818006	-0.096608	0.804716
Unigene37823_DB	black	0.145248	0.709255	0.0645709	0.868913	0.168574	0.664613	0.35476	0.348858	0.40219	0.283228	0.676213	0.0455207	0.409435	0.273816	0.0138569	0.971775	0.307845	0.420303	-0.0902589	0.81737	0.794824	0.0104716	0.430376	0.247548	0.435614	0.241199	0.10454	0.788964	0.0870646	0.82375	0.223094	0.563947	-0.0490787	0.900218	0.656257	0.054899	-0.118274	0.761845	0.652853	0.0566119	-0.2119	0.584148	-0.263989	0.492467	0.178099	0.646634	-0.166937	0.667718
CL10782.Contig3_DB	black	0.131452	0.736034	0.00318959	0.993502	0.14118	0.717124	0.417804	0.263149	0.402911	0.282283	0.710406	0.031971	0.417933	0.262987	0.121164	0.756167	0.0788952	0.840107	-0.310419	0.416223	0.876203	0.00194336	0.322756	0.396923	0.256781	0.504787	0.026492	0.946062	0.281776	0.462607	0.410731	0.27215	0.0579843	0.882206	0.529714	0.142442	-0.296398	0.438658	0.677209	0.0450816	-0.279761	0.46595	-0.124115	0.750379	0.133839	0.731383	-0.128278	0.742231
CL15382.Contig1_DB	black	0.00978563	0.980066	0.303672	0.426954	-0.170232	0.661472	-0.547856	0.126759	-0.344852	0.363423	-0.371946	0.324286	-0.29872	0.434908	0.165207	0.671004	0.367116	0.331102	0.40318	0.281932	-0.624896	0.0719637	0.157152	0.686368	-0.184051	0.635478	0.0878569	0.822167	-0.393972	0.294104	-0.116681	0.76498	-0.509943	0.160767	0.0762726	0.84537	0.479875	0.191112	-0.616824	0.0768323	0.113608	0.771035	-0.372477	0.323541	-0.357059	0.345521	0.440753	0.235055
CL12549.Contig2_DB	black	0.103892	0.790247	-0.239421	0.534957	0.270616	0.48125	0.458049	0.215009	0.230181	0.551293	0.576114	0.104468	0.532605	0.13987	0.0860925	0.825693	-0.254945	0.507945	-0.24731	0.521161	0.686977	0.0409203	0.0332301	0.932366	0.367651	0.330344	-0.238183	0.537135	0.201968	0.602285	0.214413	0.57959	0.286427	0.45493	0.095341	0.807238	-0.352959	0.351484	0.547051	0.127432	-0.39987	0.286277	0.165583	0.670289	0.387221	0.303195	-0.135074	0.72898
Unigene30777_DB	black	0.0671547	0.863707	0.168001	0.665699	-0.10147	0.795053	-0.386934	0.303585	-0.400177	0.285873	-0.480414	0.190542	-0.371808	0.32448	-0.176215	0.650178	-0.112306	0.773603	0.365605	0.333249	-0.411634	0.270992	0.0713749	0.855212	0.0419897	0.914585	0.0199331	0.959406	0.165649	0.670164	0.0130118	0.973496	-0.343071	0.366071	0.107009	0.784072	0.384299	0.307174	-0.504382	0.166154	0.795233	0.0104032	-0.483497	0.187298	-0.292109	0.445627	0.170693	0.660599
CL11438.Contig1_DB	black	0.41512	0.266546	-0.000252188	0.999486	0.0081431	0.983412	0.29113	0.447223	-0.087734	0.822412	0.429227	0.248953	0.55159	0.123665	0.340897	0.369316	-0.0433737	0.911778	-0.0570301	0.884134	0.829837	0.00564207	0.420122	0.260235	0.444153	0.231037	0.0989478	0.800063	0.616475	0.0770472	0.41746	0.263584	-0.227697	0.555716	0.70833	0.032707	0.117246	0.763867	0.329146	0.387093	-0.073131	0.851681	-0.576973	0.103831	-0.035263	0.928237	0.366682	0.331718
CL10199.Contig1_DB	black	0.289707	0.449549	0.301738	0.430052	0.170199	0.661534	0.141637	0.716239	0.386682	0.303927	0.59341	0.0920898	0.0943636	0.809185	-0.105527	0.787006	0.202962	0.600461	-0.38025	0.312732	0.728419	0.0260368	0.724345	0.0273096	0.241461	0.531376	-0.353415	0.350819	0.0265747	0.945894	0.629192	0.0694532	-0.405927	0.278351	0.750274	0.0198716	-0.484496	0.186254	0.243759	0.527354	-0.0875678	0.822744	-0.362512	0.337665	-0.353262	0.351041	-0.0778161	0.842272
CL23338.Contig1_DB	black	0.0455197	0.907428	-0.0586559	0.880849	0.403393	0.281654	0.191767	0.62111	0.0505438	0.897252	0.387398	0.302955	0.210111	0.5874	0.0358266	0.927093	0.107807	0.782494	0.212145	0.583704	0.493914	0.176572	0.116614	0.765111	0.427794	0.250711	0.214921	0.578672	0.305075	0.424713	0.421652	0.258321	0.0329474	0.932941	0.572204	0.107399	0.219312	0.570744	0.521931	0.149502	0.585883	0.0973598	-0.508271	0.162375	0.322757	0.396922	-0.207988	0.59127
CL23757.Contig6_DB	black	-0.0769065	0.844098	-0.173187	0.655886	0.0442351	0.910032	0.443931	0.231298	0.377335	0.316763	0.545128	0.129049	0.318156	0.404071	-0.0444977	0.909499	-0.42599	0.252933	-0.344747	0.363578	0.677577	0.04492	-0.0706508	0.856669	0.127798	0.743169	-0.0641245	0.869813	0.465373	0.206816	0.216514	0.57579	0.412049	0.27046	0.0141213	0.971237	-0.414064	0.267888	0.67079	0.0479588	-0.172053	0.658027	0.252933	0.511414	0.324431	0.394335	-0.287286	0.453517
CL15882.Contig1_DB	black	-0.0281858	0.942618	0.198157	0.609294	-0.199791	0.606286	-0.418314	0.262507	-0.219132	0.571067	-0.43829	0.237988	-0.333004	0.381214	0.243744	0.527381	0.415013	0.266681	0.0349148	0.928944	-0.673416	0.0467681	-0.0145462	0.970372	-0.517737	0.153389	0.0593609	0.879426	-0.519016	0.152197	-0.143206	0.713203	-0.314812	0.409302	-0.211717	0.584481	0.173642	0.655027	-0.627002	0.0707258	-0.284992	0.457293	0.0688152	0.860363	-0.427665	0.25087	0.359423	0.342104
CL7692.Contig2_DB	black	0.0808488	0.836191	-0.0598265	0.878485	0.126271	0.746156	0.385961	0.304907	0.35679	0.345911	0.68591	0.0413621	0.57221	0.107394	-0.0219249	0.955353	0.0735401	0.850859	0.034968	0.928836	0.713038	0.0310541	0.275805	0.472543	0.579372	0.102063	-0.0180519	0.963235	0.02574	0.947592	-0.0749081	0.84811	0.112387	0.773444	0.366982	0.331293	-0.097905	0.802136	0.656598	0.0547292	-0.448631	0.225803	-0.0552239	0.887784	0.423999	0.255398	-0.13507	0.728988
CL9336.Contig3_DB	black	0.220327	0.568917	0.0360219	0.926696	0.279595	0.466226	0.338699	0.372612	0.253561	0.510331	0.404614	0.28006	0.105921	0.786227	-0.0529178	0.892448	0.140907	0.717654	-0.296072	0.439187	0.775544	0.0140514	0.348349	0.35825	0.225876	0.558968	0.108058	0.781997	0.462504	0.210004	0.655535	0.0552596	-0.0636902	0.870689	0.724951	0.0271178	-0.217263	0.574438	0.503116	0.167394	0.446575	0.228199	-0.413263	0.26891	-0.0868682	0.824143	-0.275208	0.473542
CL3487.Contig1_DB	black	0.208498	0.590338	-0.0435685	0.911383	0.358497	0.34344	0.486895	0.18376	0.425956	0.252976	0.517095	0.153989	0.27662	0.471182	-0.0424208	0.913711	0.442291	0.233232	-0.332147	0.382515	0.811943	0.00785882	0.340161	0.370418	0.298503	0.435257	0.148521	0.702943	0.104591	0.788862	0.397061	0.289991	0.0524053	0.893485	0.660395	0.0528618	-0.286551	0.454726	0.650861	0.0576297	-0.0161498	0.967107	-0.166832	0.667917	0.0863606	0.825157	-0.389714	0.299822
CL2275.Contig2_DB	black	0.0303048	0.938311	0.126689	0.745339	-0.411906	0.270643	-0.377097	0.317093	-0.511366	0.159405	-0.41783	0.263117	-0.0257764	0.947518	0.385653	0.305328	0.134196	0.730688	0.506408	0.164179	-0.449802	0.224445	-0.0509607	0.896408	-0.126519	0.745672	0.466783	0.205258	0.133123	0.732778	-0.289357	0.450122	-0.305876	0.423436	0.0360151	0.92671	0.779954	0.0131698	-0.418869	0.261808	0.101882	0.794235	-0.423451	0.256079	-0.16046	0.680046	0.639241	0.0637971
CL8250.Contig2_DB	black	0.202501	0.601306	-0.0388497	0.920956	0.380493	0.312397	0.452609	0.221208	0.372182	0.323954	0.505412	0.165148	0.258657	0.501568	0.0807264	0.836436	0.482414	0.188435	-0.339254	0.371779	0.784961	0.0122147	0.308924	0.418591	0.204661	0.597347	0.207785	0.59164	0.131134	0.736655	0.510044	0.16067	0.0312708	0.936348	0.686216	0.041235	-0.232803	0.546638	0.631398	0.0681857	0.0185584	0.962204	-0.21722	0.574516	0.0542283	0.889797	-0.321515	0.398846
Unigene35558_DB	black	-0.353464	0.350747	-0.0887724	0.820338	-0.0883842	0.821113	-0.131218	0.736491	0.126919	0.744889	-0.395254	0.292393	-0.344013	0.36467	-0.243166	0.528391	0.159367	0.682133	0.00939832	0.980855	-0.708824	0.0325309	-0.437151	0.239352	-0.394299	0.293666	0.0393936	0.919852	-0.624372	0.0722737	-0.618841	0.0755966	0.315682	0.407939	-0.723842	0.0274695	-0.0912676	0.815357	-0.216138	0.576471	-0.27066	0.481177	0.694652	0.0378307	0.120197	0.758066	-0.315132	0.4088
CL28093.Contig1_DB	black	0.0909252	0.81604	0.0747229	0.848482	0.216044	0.576641	0.272519	0.47805	0.531526	0.140827	0.522411	0.14906	0.20323	0.599969	-0.220528	0.568556	0.328411	0.388217	-0.319116	0.402574	0.459878	0.212946	0.389294	0.300389	0.251782	0.513404	-0.326471	0.391195	-0.456364	0.216919	0.0249903	0.949117	-0.0226323	0.953914	0.239088	0.535542	-0.537073	0.13595	0.341235	0.368812	-0.595231	0.090842	0.223511	0.563199	0.0436453	0.911228	-0.327523	0.389578
CL7561.Contig1_DB	black	-0.0431282	0.912276	-0.0943679	0.809176	0.231845	0.548337	0.504045	0.166484	0.642144	0.0622195	0.51769	0.153433	0.179861	0.643325	-0.174298	0.65379	0.313694	0.411059	-0.461131	0.211539	0.617045	0.0766957	0.101506	0.79498	0.0654552	0.867131	0.0788659	0.840166	-0.102895	0.792225	0.113917	0.770424	0.327767	0.389205	0.210288	0.587078	-0.518127	0.153025	0.709923	0.0321415	-0.338352	0.373133	0.341823	0.367933	0.213098	0.581975	-0.586272	0.0970832
CL448.Contig2_DB	black	0.176624	0.649407	-0.175187	0.652114	0.0980158	0.801915	0.505168	0.165386	0.189328	0.625641	0.483853	0.186926	0.55145	0.12378	-0.00546238	0.988872	-0.04842	0.901552	0.0204713	0.958311	0.839108	0.0046821	0.164783	0.67181	0.587452	0.096247	0.257522	0.503515	0.527272	0.144635	0.0445065	0.909482	0.193861	0.61723	0.490345	0.180206	0.0623588	0.873375	0.714667	0.0304952	0.0244856	0.950143	-0.25008	0.516351	0.3917	0.297148	-0.153127	0.694084
CL442.Contig2_DB	black	0.140055	0.719304	-0.178334	0.646193	0.209666	0.588212	0.488638	0.18196	0.19264	0.619491	0.500956	0.169524	0.558403	0.118136	0.11427	0.76973	0.241102	0.532006	0.106083	0.785906	0.776924	0.0137714	0.137959	0.723372	0.550417	0.124632	0.429188	0.249001	0.353921	0.35008	0.0583829	0.881401	0.187777	0.628527	0.573599	0.106348	0.205482	0.595845	0.773845	0.0144013	0.0149083	0.969635	-0.30417	0.426157	0.459487	0.213386	-0.170509	0.660948
CL8683.Contig1_DB	black	0.249642	0.517111	-0.157356	0.685977	0.00578753	0.98821	0.34904	0.357232	-0.0808043	0.83628	0.406825	0.277187	0.553818	0.12184	0.56392	0.11377	-0.178468	0.64594	-0.248997	0.51823	0.70904	0.032454	0.0691047	0.85978	0.0908624	0.816165	0.145836	0.70812	0.628058	0.0701107	0.46263	0.209863	0.0605923	0.87694	0.334315	0.379225	0.000189669	0.999614	0.384842	0.306433	-0.313609	0.411192	-0.202348	0.601587	0.0775369	0.842832	0.367613	0.330398
CL18908.Contig1_DB	black	0.131615	0.735717	-0.127577	0.743602	0.284466	0.458159	0.337981	0.373691	0.174193	0.653989	0.528137	0.143856	0.345151	0.36298	0.274421	0.474859	-0.176775	0.649123	-0.430169	0.247801	0.644059	0.0611917	0.0844461	0.828987	0.0488879	0.900604	-0.228392	0.554477	0.268109	0.485482	0.61057	0.0807411	0.130371	0.738143	0.20808	0.591102	-0.414966	0.266742	0.404231	0.28056	-0.270258	0.481853	0.0470745	0.904278	0.0914883	0.814917	-0.0121933	0.975163
CL7534.Contig1_DB	black	0.26285	0.494406	-0.0932341	0.811436	0.0879457	0.821989	0.460554	0.212187	0.132331	0.734321	0.457436	0.215702	0.455905	0.21744	0.2487	0.518745	0.0804287	0.837033	-0.200061	0.605789	0.894013	0.00114894	0.237797	0.537815	0.293231	0.443798	0.338197	0.373366	0.650017	0.0580643	0.426561	0.252229	0.0462094	0.90603	0.659655	0.0532226	0.0174569	0.964446	0.623832	0.0725939	0.058698	0.880764	-0.379403	0.313901	0.0980643	0.801819	0.0127697	0.973989
Unigene3960_DB	black	-0.396727	0.290434	-0.0819448	0.833995	0.0798495	0.838194	-0.286997	0.453993	-0.114634	0.769012	-0.124087	0.750434	-0.225037	0.560466	-0.187584	0.628886	-0.514577	0.156356	0.314927	0.409122	-0.568547	0.110184	-0.43971	0.236295	-0.0729342	0.852077	-0.304301	0.425949	-0.211027	0.585735	-0.200273	0.605399	0.253436	0.510546	-0.643184	0.06166	0.0411873	0.916212	-0.172563	0.657064	0.236348	0.54037	0.301937	0.429733	0.339723	0.371075	-0.131163	0.736599
CL11195.Contig3_DB	black	-0.290618	0.448059	-0.215816	0.577053	-0.0896113	0.818663	-0.0735572	0.850825	-0.031867	0.935136	-0.572158	0.107433	-0.356236	0.346713	-0.139242	0.720881	-0.0254641	0.948153	-0.134122	0.730832	-0.727784	0.0262326	-0.601546	0.0865946	-0.531598	0.140763	0.0429583	0.912621	-0.388328	0.301695	-0.502188	0.168307	0.408441	0.275097	-0.856615	0.00318531	-0.133086	0.732848	-0.316046	0.407369	-0.183361	0.636769	0.762836	0.0168106	0.0554741	0.887278	-0.244426	0.526188
CL24781.Contig2_DB	black	0.302126	0.42943	-0.0224802	0.954223	0.0763271	0.845261	0.342817	0.36645	0.128806	0.741199	0.456517	0.216745	0.575293	0.105079	0.000395646	0.999194	0.225198	0.56018	0.16669	0.668186	0.71007	0.0320896	0.429927	0.248097	0.719937	0.0287319	0.128014	0.742747	0.163494	0.674263	-0.0981903	0.801569	-0.11603	0.766261	0.623496	0.0727937	0.155777	0.689001	0.462862	0.209605	-0.213988	0.580361	-0.395165	0.292511	0.241698	0.530961	0.0400038	0.918614
Unigene816_DB	black	-0.106213	0.785648	-0.254192	0.509243	0.0281095	0.942774	0.494162	0.176321	0.363215	0.336659	0.503335	0.16718	0.404649	0.280014	-0.108146	0.781824	-0.421885	0.25803	-0.207785	0.591639	0.633917	0.0667563	-0.154074	0.692267	0.261906	0.496014	0.012863	0.973799	0.422795	0.256895	-0.0374204	0.923857	0.514006	0.156896	-0.0737424	0.850452	-0.303554	0.427142	0.725626	0.0269052	-0.217396	0.574198	0.316069	0.407332	0.497144	0.173318	-0.336546	0.375852
Unigene36647_DB	black	0.158363	0.684052	0.0958999	0.806125	0.0758239	0.846271	0.0328086	0.933223	-0.101045	0.795896	0.476534	0.194669	0.296172	0.439025	0.37812	0.315675	-0.244261	0.526476	0.0143064	0.97086	0.562834	0.114622	0.269666	0.482852	0.18951	0.625302	-0.037267	0.924168	0.546991	0.127482	0.669585	0.0485115	-0.216128	0.576488	0.530979	0.141313	0.0997878	0.798393	0.252996	0.511306	0.179167	0.644628	-0.55856	0.118011	-0.0217963	0.955615	0.347658	0.359269
CL7583.Contig1_DB	black	0.262973	0.494197	-0.0960569	0.805813	0.013474	0.972555	0.3855	0.305536	-0.00897029	0.981727	0.337476	0.37445	0.432336	0.245162	0.494868	0.175607	0.149635	0.700796	-0.210928	0.585914	0.767446	0.0157714	0.146182	0.707452	0.0750443	0.847837	0.486348	0.184327	0.690741	0.0393852	0.488669	0.181928	0.0119304	0.975698	0.615401	0.0777108	0.151892	0.696457	0.507342	0.163273	0.00110143	0.997756	-0.403409	0.281633	0.00537009	0.98906	0.212846	0.582431
CL985.Contig1_DB	black	0.234563	0.543523	-0.156021	0.688534	0.060384	0.87736	0.416378	0.264951	0.0341416	0.930515	0.561606	0.11559	0.734425	0.0242324	0.220334	0.568905	-0.0970506	0.803835	0.15897	0.682893	0.820131	0.00678258	0.217588	0.573851	0.670281	0.0481917	0.176362	0.649901	0.48226	0.188596	0.0343618	0.930068	0.0724992	0.852951	0.497082	0.173381	0.207448	0.592254	0.61331	0.0790138	-0.218845	0.571584	-0.353478	0.350726	0.423965	0.255441	0.157437	0.685822
CL17322.Contig1_DB	black	-0.126186	0.746324	0.0345543	0.929677	-0.243851	0.527193	-0.417549	0.263471	-0.431677	0.245963	-0.7038	0.0343503	-0.435686	0.241112	-0.0833172	0.831246	-0.158081	0.684591	0.323231	0.396189	-0.776623	0.0138322	-0.302071	0.429519	-0.283697	0.45943	0.116645	0.765051	-0.0104341	0.978746	-0.312825	0.412427	-0.0826833	0.832516	-0.406859	0.277143	0.387238	0.303172	-0.611579	0.0801021	0.473232	0.19822	-0.0306563	0.937596	-0.18639	0.631111	0.180086	0.642902
CL905.Contig1_DB	black	-0.0224913	0.9542	-0.33372	0.380127	0.246009	0.523427	0.561051	0.116029	0.265985	0.489077	0.610945	0.0805034	0.64116	0.0627513	0.078909	0.84008	-0.149579	0.700904	0.00856974	0.982543	0.733963	0.0243683	-0.120739	0.757001	0.506332	0.164254	0.16716	0.667295	0.319695	0.401673	-0.0250816	0.948931	0.483652	0.187136	0.145996	0.707812	-0.0374924	0.923711	0.856456	0.00319718	-0.237831	0.537754	0.102773	0.792466	0.706215	0.0334677	-0.266365	0.488434
CL17849.Contig3_DB	black	0.225384	0.559846	-0.103252	0.791517	0.207371	0.592394	0.440203	0.235708	0.19787	0.609824	0.660921	0.0526064	0.63522	0.0660244	0.101021	0.795943	0.0200814	0.959104	0.0248015	0.949501	0.881844	0.00166018	0.313989	0.410596	0.649101	0.0585386	0.054274	0.889705	0.328206	0.388531	0.186242	0.631387	0.0481505	0.902098	0.580002	0.101603	0.000177839	0.999638	0.667341	0.0495517	-0.179006	0.64493	-0.314044	0.410508	0.365075	0.334004	-0.0333992	0.932023
CL9894.Contig2_DB	black	0.0445051	0.909484	0.120699	0.75708	-0.303402	0.427386	-0.524687	0.146979	-0.610333	0.0808912	-0.58223	0.0999823	-0.163323	0.674588	0.110816	0.776544	-0.120085	0.758285	0.560048	0.116824	-0.720833	0.0284391	-0.0581774	0.881816	-0.00546604	0.988865	-0.00840112	0.982886	-0.1088	0.78053	-0.391787	0.297031	-0.363581	0.336135	-0.231594	0.548782	0.602359	0.0860569	-0.75605	0.018422	0.168504	0.664746	-0.294151	0.442304	-0.195294	0.614579	0.58182	0.100279
Unigene37638_DB	black	0.00606381	0.987647	-0.148427	0.703123	0.393671	0.294505	0.3004	0.432202	0.139398	0.720578	0.617728	0.076277	0.494595	0.175883	0.0412593	0.916066	-0.0357215	0.927306	0.276717	0.471021	0.607106	0.0829579	0.0870143	0.823851	0.6433	0.0615978	0.0651207	0.867805	0.189239	0.625806	0.183249	0.636978	0.170961	0.660092	0.415905	0.26555	0.156792	0.687057	0.680769	0.043535	0.154548	0.691357	-0.30875	0.418867	0.601725	0.0864761	-0.18635	0.631186
CL3021.Contig1_DB	black	-0.0965941	0.804744	-0.217395	0.5742	0.229659	0.552221	0.437709	0.238684	0.326988	0.3904	0.677116	0.0451227	0.496868	0.173595	-0.0768764	0.844158	-0.330734	0.384667	0.0220039	0.955192	0.69366	0.038221	-0.0458947	0.906668	0.50455	0.165989	-0.031964	0.934939	0.319059	0.402663	0.0738872	0.850161	0.410621	0.272291	0.134012	0.731045	-0.148885	0.702242	0.804787	0.0088896	-0.0761607	0.845595	0.0660528	0.865927	0.640912	0.0628857	-0.322459	0.397383
CL7945.Contig4_DB	black	-0.0645071	0.869042	-0.0550999	0.888035	-0.424689	0.254543	-0.0455601	0.907346	-0.0751844	0.847555	-0.472343	0.199182	-0.247812	0.520288	0.0955704	0.806781	-0.141323	0.716847	-0.372511	0.323493	-0.370635	0.326129	-0.307332	0.421117	-0.638757	0.0640631	0.102345	0.793316	0.0803126	0.837265	-0.233714	0.545025	0.14879	0.702423	-0.540204	0.133242	-0.179851	0.643344	-0.351879	0.353063	-0.336244	0.376308	0.505016	0.165535	-0.330934	0.384363	0.140859	0.717747
Unigene4879_DB	black	0.317256	0.405476	0.179018	0.644907	0.0851082	0.827662	0.167793	0.666094	0.176174	0.650255	0.601126	0.0868729	0.452967	0.220797	-0.0867834	0.824312	0.0904379	0.817012	0.131248	0.736432	0.730965	0.0252615	0.667747	0.0493626	0.732116	0.0249161	-0.202216	0.60183	0.105406	0.787247	0.149814	0.700452	-0.354579	0.349122	0.738365	0.0230949	-0.0141824	0.971113	0.328133	0.388643	-0.143143	0.713325	-0.536162	0.136744	0.0447263	0.909036	0.104397	0.789247
CL12778.Contig1_DB	black	0.258349	0.502097	-0.0877306	0.822419	0.0959758	0.805974	0.316518	0.40663	0.00389693	0.992061	0.621056	0.0742551	0.727436	0.0263404	0.249604	0.517176	-0.148406	0.703165	0.160567	0.679843	0.778576	0.0134412	0.307338	0.421108	0.680283	0.043744	-0.0327617	0.933318	0.367606	0.330407	0.128245	0.742296	-0.0481683	0.902062	0.493772	0.176716	0.14036	0.718714	0.490276	0.180277	-0.30607	0.423126	-0.384145	0.307385	0.354194	0.349683	0.259231	0.500586
CL4156.Contig2_DB	black	0.156296	0.688007	-0.0392915	0.920059	0.186046	0.631753	0.40259	0.282704	0.393739	0.294415	0.5197	0.151562	0.25262	0.511955	-0.266204	0.488706	-0.213534	0.581184	-0.369181	0.32818	0.747627	0.0205604	0.297204	0.437355	0.368288	0.329441	-0.321983	0.398121	0.250739	0.515208	0.29502	0.440892	0.100036	0.797901	0.308532	0.419213	-0.540398	0.133075	0.475482	0.195796	-0.0815494	0.834787	0.0355137	0.927728	0.0830529	0.831775	-0.332437	0.382075
CL12309.Contig2_DB	black	0.220724	0.568203	0.0680795	0.861844	-0.00564466	0.988501	0.212588	0.5829	0.209397	0.5887	0.492324	0.178186	0.313352	0.411597	-0.0721403	0.853673	-0.335666	0.377181	-0.283668	0.459477	0.632075	0.0677996	0.39387	0.29424	0.32535	0.392919	-0.452295	0.221569	0.243738	0.527391	0.276289	0.471735	-0.116332	0.765668	0.267655	0.486248	-0.4353	0.241576	0.210212	0.587217	-0.320458	0.400487	-0.0644019	0.869254	-0.0695039	0.858977	0.0641087	0.869845
CL28981.Contig2_DB	black	0.321136	0.399434	0.0661824	0.865666	0.14925	0.701538	0.323788	0.395328	0.16631	0.668908	0.557673	0.118721	0.399362	0.286946	0.0825044	0.832874	0.06826	0.861481	-0.122963	0.752637	0.89156	0.00124167	0.497234	0.173228	0.474132	0.197248	0.0361346	0.926467	0.466581	0.205481	0.48969	0.180878	-0.18966	0.625023	0.795903	0.0102919	-0.0710741	0.855817	0.490338	0.180213	0.100732	0.796518	-0.531356	0.140978	-0.0093427	0.980969	0.0259254	0.947215
Unigene35795_DB	black	0.386222	0.304552	0.0918028	0.814289	0.145682	0.708418	0.252828	0.511596	0.096634	0.804664	0.621313	0.0741003	0.541855	0.131827	0.182027	0.639264	0.0769813	0.843947	-0.0516922	0.894928	0.837143	0.00487547	0.588159	0.0957475	0.573498	0.106423	-0.160654	0.679676	0.249241	0.517806	0.396692	0.29048	-0.307454	0.420924	0.744337	0.0214385	-0.0640325	0.869999	0.349142	0.357081	-0.245615	0.524114	-0.511563	0.159217	-0.00255233	0.9948	0.231618	0.54874
CL17608.Contig2_DB	black	-0.0283643	0.942256	0.29061	0.448072	-0.00927521	0.981106	-0.49292	0.177579	-0.123889	0.750821	-0.374962	0.320065	-0.638507	0.0642003	-0.0970747	0.803788	-0.0312334	0.936423	-0.237627	0.538114	-0.602778	0.0857801	0.0946243	0.808666	-0.55108	0.124085	-0.500518	0.169957	-0.387688	0.302561	0.340983	0.369187	-0.380118	0.312914	-0.231835	0.548354	-0.323108	0.396379	-0.75114	0.0196495	0.170442	0.661074	0.0737824	0.850372	-0.647966	0.0591294	0.114205	0.769858
CL16122.Contig2_DB	black	0.117082	0.764191	-0.11371	0.770834	0.0652832	0.867478	0.417496	0.263539	0.193043	0.618744	0.553463	0.12213	0.60862	0.0819848	0.118344	0.761707	0.148757	0.702488	0.180964	0.641255	0.747392	0.0206223	0.193037	0.618755	0.587482	0.0962253	0.363706	0.335957	0.326407	0.391292	-0.0689138	0.860164	0.129343	0.740151	0.522967	0.148551	0.235063	0.542638	0.727548	0.0263056	-0.155921	0.688725	-0.294946	0.441013	0.458441	0.214566	-0.0463914	0.905662
CL3241.Contig2_DB	black	0.0500746	0.898202	0.0363116	0.926108	0.344687	0.363669	0.295361	0.440338	0.477898	0.193212	0.664681	0.0508034	0.236213	0.540607	-0.387382	0.302978	-0.0617693	0.874564	-0.117034	0.764285	0.653187	0.0564423	0.372466	0.323556	0.559569	0.117205	-0.395744	0.291741	-0.0720607	0.853833	0.212845	0.582433	0.0434276	0.911669	0.374872	0.320191	-0.446853	0.227874	0.537633	0.135463	-0.0215652	0.956085	-0.0467239	0.904988	0.256297	0.505619	-0.453843	0.219794
CL18671.Contig1_DB	black	-0.16853	0.664696	0.126124	0.746444	-0.231609	0.548756	-0.503405	0.167111	-0.331799	0.383045	-0.60209	0.0862343	-0.415637	0.26589	-0.233755	0.544952	-0.0562691	0.885672	0.480782	0.190153	-0.859876	0.00294869	-0.169146	0.663529	-0.108015	0.782082	-0.0350821	0.928605	-0.342313	0.367202	-0.528035	0.143948	-0.172197	0.657757	-0.41355	0.268543	0.383785	0.307877	-0.640385	0.0631725	0.2971	0.437523	-0.00659501	0.986565	-0.113197	0.771846	0.13751	0.724245
CL17601.Contig1_DB	black	-0.00715578	0.985423	-0.211881	0.584183	0.0979047	0.802136	0.460227	0.212554	0.287628	0.452956	0.608095	0.0823212	0.525891	0.145884	-0.0331862	0.932456	-0.385791	0.30514	-0.0946021	0.80871	0.726009	0.0267849	-0.00449284	0.990847	0.444092	0.231109	-0.0615677	0.874971	0.403782	0.281145	0.0447183	0.909052	0.364913	0.334234	0.105413	0.787233	-0.211943	0.584071	0.704975	0.0339189	-0.23038	0.550938	0.108643	0.780839	0.503623	0.166897	-0.200022	0.60586
Unigene5812_DB	black	-0.300121	0.432651	-0.216046	0.576636	-0.2831	0.460416	-0.237451	0.538425	-0.456743	0.216489	-0.447519	0.227097	0.0235527	0.952041	0.276543	0.471311	-0.283995	0.458938	0.53184	0.140548	-0.672188	0.0473223	-0.643436	0.061525	-0.187235	0.629536	0.382379	0.309803	0.0717807	0.854396	-0.586627	0.0968312	0.291632	0.446404	-0.649407	0.0583799	0.654508	0.0557751	-0.22213	0.565676	0.0111348	0.977319	0.179486	0.644028	0.376662	0.317698	0.321181	0.399364
CL7521.Contig3_DB	black	0.237525	0.538294	-0.0464499	0.905543	0.0564322	0.885342	0.331073	0.384151	0.105403	0.787252	0.659143	0.0534732	0.674041	0.0464872	0.292218	0.445449	-0.0719647	0.854026	-0.00395154	0.99195	0.800962	0.00947627	0.327605	0.389454	0.510768	0.159976	-0.0258815	0.947304	0.319743	0.401598	0.200963	0.60413	-0.047387	0.903645	0.48418	0.186584	0.00927805	0.9811	0.507265	0.163348	-0.443798	0.231455	-0.284064	0.458823	0.252337	0.512444	0.240895	0.532369
CL12503.Contig4_DB	black	0.345951	0.361793	0.0811248	0.835638	-0.0392846	0.920073	0.129631	0.739589	-0.0710394	0.855887	0.508779	0.161886	0.664581	0.0508509	0.365529	0.333358	0.141114	0.717253	0.202714	0.600916	0.590791	0.0939032	0.495913	0.174554	0.572614	0.107089	-0.0288025	0.941364	0.0975184	0.802905	0.0417826	0.915005	-0.336986	0.37519	0.574872	0.105393	0.239926	0.534071	0.204127	0.598327	-0.555089	0.120806	-0.479586	0.191419	0.0922177	0.813462	0.512047	0.158755
Unigene26054_DB	black	0.154683	0.691099	-0.0589871	0.88018	0.0830791	0.831723	0.433641	0.243581	0.357923	0.34427	0.384664	0.306676	0.142947	0.713704	-0.0673595	0.863294	-0.164333	0.672666	-0.600288	0.0874305	0.738472	0.0230643	0.177594	0.647584	0.00421178	0.99142	-0.0992374	0.799487	0.460436	0.212319	0.480414	0.190542	0.150698	0.698751	0.286716	0.454455	-0.56385	0.113825	0.454714	0.218798	-0.0462743	0.905899	0.0881952	0.821491	-0.103392	0.79124	-0.266296	0.488551
Unigene4909_DB	black	0.0546739	0.888896	-0.216086	0.576564	0.0261482	0.946762	0.557256	0.119057	0.293409	0.44351	0.426339	0.252503	0.424259	0.255076	0.332386	0.382152	0.160888	0.67923	-0.375116	0.31985	0.747305	0.0206454	-0.0700096	0.857959	-0.0384658	0.921735	0.500225	0.170248	0.486903	0.183752	0.238511	0.536557	0.360995	0.339841	0.298384	0.435449	-0.103133	0.791752	0.754309	0.0188513	-0.286448	0.454895	0.0859693	0.82594	0.234482	0.543666	-0.13362	0.73181
CL4260.Contig6_DB	black	0.130628	0.737642	-0.179859	0.643328	-0.127412	0.743925	0.405519	0.278882	0.0967624	0.804409	0.453222	0.220505	0.681062	0.0434094	0.148837	0.702333	-0.17658	0.649491	0.100594	0.796792	0.6504	0.0578668	0.085215	0.827448	0.522024	0.149416	0.172242	0.65767	0.38807	0.302045	-0.249939	0.516595	0.195269	0.614626	0.199068	0.607617	0.126465	0.745776	0.549057	0.125759	-0.466247	0.205849	-0.0544183	0.889413	0.432769	0.244637	0.131467	0.736005
CL15983.Contig2_DB	black	-0.00490424	0.990009	-0.217333	0.574312	0.166345	0.668842	0.541869	0.131815	0.412017	0.270501	0.634151	0.0666245	0.503498	0.16702	-0.0696256	0.858732	-0.165162	0.671089	-0.183829	0.635893	0.778068	0.0135422	0.023037	0.95309	0.411231	0.271508	0.0234234	0.952304	0.287868	0.452563	0.0416425	0.915289	0.398732	0.287779	0.175117	0.652245	-0.2796	0.466219	0.800605	0.00953241	-0.277776	0.469253	0.167413	0.666814	0.497788	0.172674	-0.342685	0.366647
CL26825.Contig2_DB	black	0.16185	0.677395	-0.154989	0.690511	-0.160594	0.67979	0.364068	0.335439	0.069619	0.858745	0.233945	0.544617	0.563647	0.113984	0.024515	0.950083	0.0582191	0.881732	0.18285	0.637723	0.485048	0.185678	0.109199	0.779741	0.530949	0.14134	0.304661	0.425373	0.244558	0.525958	-0.456512	0.216751	0.134404	0.730283	0.223237	0.563691	0.238869	0.535929	0.426848	0.251875	-0.370976	0.325648	-0.0827016	0.832479	0.356074	0.346949	0.0628416	0.872401
CL3770.Contig6_DB	black	0.261448	0.496797	-0.00478916	0.990244	0.154342	0.691751	0.362911	0.337094	0.239417	0.534964	0.612889	0.0792774	0.560741	0.116274	-0.0540437	0.890171	0.097941	0.802064	0.0549744	0.888289	0.801707	0.00936013	0.457669	0.215438	0.71203	0.0314031	-0.060115	0.877903	0.151049	0.698076	0.0561784	0.885855	-0.0837545	0.830371	0.601536	0.086601	-0.0468111	0.904811	0.53422	0.138446	-0.234973	0.542797	-0.321808	0.398392	0.255586	0.506842	-0.0479487	0.902507
CL18331.Contig2_DB	black	-0.278358	0.468283	0.0418132	0.914943	0.137462	0.724336	-0.31087	0.415511	0.0393151	0.920011	-0.350763	0.354699	-0.514726	0.156215	-0.18859	0.627013	0.137716	0.723844	-0.0721768	0.853599	-0.744134	0.0214933	-0.27456	0.474626	-0.469143	0.202667	-0.268775	0.484356	-0.697803	0.036607	-0.124774	0.749087	0.0642707	0.869519	-0.561324	0.115812	-0.227092	0.556796	-0.43006	0.247934	-0.0229162	0.953336	0.475918	0.195328	-0.117914	0.762554	-0.239567	0.534701
CL11656.Contig7_DB	black	0.159671	0.681553	-0.0263614	0.946328	0.308659	0.419011	0.381338	0.311233	0.376423	0.31803	0.687306	0.0407845	0.387014	0.303476	-0.13543	0.728286	-0.0962887	0.805352	-0.231289	0.549323	0.803318	0.00911189	0.357776	0.344482	0.494621	0.175857	-0.3201	0.401042	0.13328	0.732472	0.358012	0.344141	0.0421968	0.914165	0.433712	0.243494	-0.422659	0.257064	0.556632	0.119559	-0.157904	0.68493	-0.0916528	0.814589	0.205143	0.596466	-0.256084	0.505985
CL12008.Contig1_DB	black	-0.00285813	0.994178	-0.173166	0.655926	0.20264	0.601051	0.521019	0.150342	0.443153	0.232214	0.504571	0.165969	0.321385	0.399047	-0.310719	0.415749	-0.0881801	0.821521	-0.12978	0.739297	0.734882	0.0240987	0.0725155	0.852918	0.473021	0.198448	0.0912273	0.815437	0.315455	0.408294	0.020169	0.958926	0.361917	0.338518	0.284839	0.457544	-0.250108	0.516302	0.78416	0.0123642	0.102234	0.793537	0.0531476	0.891983	0.435272	0.24161	-0.542274	0.13147
CL29244.Contig2_DB	black	0.12242	0.753701	-0.0938162	0.810275	0.177532	0.6477	0.3827	0.309363	0.353503	0.35069	0.579354	0.102077	0.487558	0.183074	0.0866453	0.824588	0.126907	0.744911	-0.264377	0.491808	0.589331	0.0949238	0.213793	0.580715	0.292446	0.445077	-0.196334	0.612658	-0.164672	0.672021	0.0428425	0.912855	0.119326	0.759776	0.170064	0.661789	-0.363599	0.33611	0.455764	0.217601	-0.733451	0.0245193	0.208861	0.589677	0.236409	0.540262	-0.0937892	0.810329
CL15435.Contig1_DB	black	0.04129	0.916004	-0.202436	0.601425	0.195368	0.614443	0.586496	0.0969243	0.42713	0.251528	0.597262	0.0894626	0.476468	0.194739	0.109391	0.77936	0.175305	0.651892	-0.28014	0.465321	0.819152	0.00690561	0.044316	0.909868	0.240783	0.532566	0.290345	0.448506	0.271971	0.478971	0.167697	0.666276	0.357752	0.344517	0.350343	0.355315	-0.202935	0.60051	0.851732	0.00356354	-0.287338	0.453433	0.0915919	0.81471	0.387892	0.302286	-0.323071	0.396437
Unigene1308_DB	black	0.321801	0.398402	0.0987384	0.800479	-0.070366	0.857242	0.206306	0.59434	0.071563	0.854834	0.368826	0.328681	0.482553	0.188288	0.027046	0.944936	0.272374	0.478293	0.207511	0.592138	0.603225	0.0854863	0.521808	0.149615	0.634297	0.0665421	0.155671	0.689204	0.151109	0.697961	-0.120594	0.757285	-0.277824	0.469174	0.669465	0.0485666	0.234693	0.543293	0.301853	0.429869	-0.210336	0.586992	-0.496377	0.174088	0.0664559	0.865114	0.183709	0.636118
CL15788.Contig2_DB	black	0.279039	0.46715	0.124341	0.749936	0.191383	0.621823	0.233298	0.545762	0.168934	0.66393	0.547462	0.127088	0.257313	0.503874	0.0373581	0.923983	-0.0101323	0.97936	-0.164067	0.673172	0.823204	0.00640599	0.50371	0.166812	0.383387	0.308422	-0.0772595	0.843389	0.460747	0.21197	0.647148	0.0595575	-0.23457	0.54351	0.778067	0.0135423	-0.153408	0.693544	0.415062	0.26662	0.255434	0.507103	-0.550966	0.124179	-0.0952255	0.807468	-0.00809788	0.983504
CL20091.Contig1_DB	black	-0.0727637	0.85242	-0.247316	0.521151	0.241192	0.531848	0.589926	0.0945073	0.516907	0.154165	0.518017	0.153127	0.334425	0.379059	-0.252569	0.512044	-0.0200523	0.959163	-0.228655	0.554008	0.701944	0.035039	-0.0558767	0.886465	0.346724	0.360649	0.139103	0.721151	0.21489	0.578728	-0.0156932	0.968037	0.504132	0.166398	0.14935	0.701345	-0.327194	0.390083	0.858847	0.00302205	-0.0661784	0.865673	0.257054	0.504319	0.510496	0.160236	-0.620096	0.0748345
CL20299.Contig1_DB	black	0.0665956	0.864833	-0.0862208	0.825437	0.151025	0.698123	0.489383	0.181194	0.489762	0.180804	0.509673	0.161026	0.244193	0.526596	-0.310182	0.416599	-0.101045	0.795895	-0.336863	0.375374	0.765697	0.0161605	0.19707	0.611299	0.34271	0.36661	-0.0717354	0.854487	0.287752	0.452752	0.159615	0.68166	0.245206	0.524827	0.30457	0.425519	-0.458574	0.214415	0.659009	0.053539	-0.0220771	0.955043	0.0955558	0.80681	0.203061	0.600279	-0.485093	0.185632
CL26601.Contig1_DB	black	0.201717	0.602746	-0.00283118	0.994232	0.236869	0.539451	0.443991	0.231228	0.367428	0.33066	0.557393	0.118946	0.321676	0.398595	0.0799351	0.838022	0.355382	0.347954	-0.284365	0.458328	0.853575	0.00341733	0.352084	0.352764	0.263884	0.492646	0.228053	0.55508	0.269762	0.482689	0.442215	0.233323	0.00860868	0.982464	0.708004	0.0328235	-0.179772	0.643491	0.664683	0.0508024	-0.0160842	0.967241	-0.271043	0.480532	0.0627119	0.872662	-0.232323	0.54749
CL8879.Contig2_DB	black	0.383073	0.308852	0.305436	0.424136	0.0104003	0.978815	0.0646377	0.868779	0.182219	0.638906	0.304159	0.426176	-0.0103977	0.97882	-0.16713	0.667352	0.0268114	0.945413	-0.350819	0.354617	0.606805	0.0831522	0.706356	0.0334165	0.216792	0.575289	-0.344819	0.363472	0.251857	0.513274	0.565134	0.112822	-0.488456	0.182147	0.699014	0.036144	-0.394436	0.293484	-0.00551228	0.988771	0.134526	0.730046	-0.458571	0.214419	-0.529954	0.142227	0.0492357	0.8999
CL13347.Contig1_DB	black	0.35591	0.347187	0.138991	0.721369	0.14619	0.707438	0.302508	0.428818	0.255893	0.506313	0.509862	0.160845	0.324602	0.394071	0.12517	0.748311	0.420025	0.260357	-0.244917	0.525331	0.810396	0.00807434	0.590451	0.0941406	0.31825	0.403924	0.0835127	0.830855	0.178224	0.646398	0.454425	0.219128	-0.286396	0.45498	0.839957	0.00460023	-0.142518	0.714535	0.404364	0.280386	-0.137194	0.724858	-0.449578	0.224704	-0.172435	0.657307	0.0197179	0.959844
CL4967.Contig1_DB	black	-0.580208	0.101452	0.750995	0.0196866	-0.621021	0.0742759	-0.81723	0.00715153	0.402096	0.28335	0.231303	0.549299	-0.570574	0.108635	-0.609027	0.0817242	-0.151933	0.696376	0.586834	0.0966846	-0.670464	0.0481078	0.389299	0.300381	-0.0627209	0.872644	-0.370521	0.326289	-0.700737	0.0354915	-0.586559	0.0968795	-0.454082	0.219521	-0.200506	0.60497	0.0686295	0.860737	-0.28878	0.451067	-0.0791309	0.839635	-0.0241815	0.950762	-0.156798	0.687045	0.00108827	0.997783
CL24318.Contig1_DB	blue	0.761307	0.0171652	-0.894929	0.00111561	0.868714	0.00236876	0.892371	0.00121044	-0.563459	0.114131	-0.465266	0.206933	0.671169	0.0477854	0.47954	0.191467	0.474483	0.196869	-0.360439	0.340641	0.560243	0.116669	-0.370072	0.326922	0.418482	0.262295	0.41198	0.270549	0.426126	0.252766	0.303136	0.427811	0.420667	0.259552	0.275739	0.472653	0.134937	0.729246	0.168274	0.665182	0.168327	0.665081	-0.0700514	0.857875	0.28842	0.451658	-0.095583	0.806756
CL15681.Contig1_DB	blue	0.748018	0.0204576	-0.908489	0.00069728	0.821217	0.00664774	0.904131	0.000817007	-0.57048	0.108706	-0.505631	0.164935	0.631005	0.0684107	0.541398	0.132218	0.432887	0.244494	-0.462396	0.210124	0.555231	0.120692	-0.430071	0.247921	0.276927	0.470669	0.453366	0.22034	0.514647	0.15629	0.370614	0.326158	0.458554	0.214438	0.225813	0.559079	0.0917408	0.814413	0.157653	0.685409	0.162689	0.675796	-0.0149158	0.96962	0.227342	0.55635	-0.0735141	0.850911
CL7737.Contig6_DB	blue	0.700701	0.0355051	-0.922507	0.000395156	0.719718	0.028804	0.835572	0.00503385	-0.627786	0.0702687	-0.706338	0.033423	0.522723	0.148774	0.557069	0.119207	0.461084	0.211592	-0.482564	0.188277	0.327742	0.389242	-0.550606	0.124476	0.0944649	0.808983	0.506256	0.164327	0.428914	0.249337	0.2258	0.559103	0.490538	0.180009	0.0306991	0.937509	0.116083	0.766156	-0.00105735	0.997846	0.0890297	0.819824	0.130116	0.738642	0.158168	0.684424	-0.0372871	0.924127
Unigene3269_DB	blue	0.696352	0.0371673	-0.922283	0.000399082	0.796209	0.0102412	0.880866	0.00170709	-0.583719	0.098908	-0.578797	0.102485	0.569119	0.109746	0.513022	0.157828	0.416349	0.264988	-0.435828	0.240941	0.469643	0.202119	-0.505939	0.164635	0.223339	0.563507	0.506652	0.163942	0.522807	0.148697	0.318539	0.403473	0.504652	0.16589	0.154571	0.691312	0.126922	0.744882	0.141119	0.717243	0.234932	0.54287	0.0224942	0.954194	0.243701	0.527455	-0.110235	0.777692
CL13951.Contig1_DB	blue	0.734061	0.0243394	-0.92252	0.000394933	0.753159	0.0191384	0.884246	0.00154881	-0.619756	0.0750407	-0.583756	0.0988817	0.638817	0.0640299	0.653853	0.056105	0.528227	0.143776	-0.443784	0.231471	0.467511	0.204456	-0.493705	0.176784	0.175215	0.652062	0.584406	0.0984151	0.483236	0.187572	0.291825	0.44609	0.469042	0.202777	0.176187	0.65023	0.18981	0.624745	0.118017	0.76235	0.0620721	0.873953	0.0182403	0.962852	0.215039	0.578457	0.010574	0.978461
CL11928.Contig2_DB	blue	0.732393	0.0248335	-0.931608	0.000257524	0.810841	0.00801192	0.897192	0.00103611	-0.617922	0.0761583	-0.438678	0.237525	0.747072	0.0207069	0.61989	0.0749595	0.390304	0.299026	-0.344074	0.364578	0.569679	0.109317	-0.45208	0.221817	0.364824	0.334361	0.474422	0.196936	0.525319	0.146404	0.311244	0.414919	0.472217	0.199318	0.217438	0.574122	0.202218	0.601825	0.201586	0.602987	0.0887198	0.820443	-0.0529219	0.89244	0.343102	0.366025	0.0145818	0.970299
CL1251.Contig1_DB	blue	-0.719008	0.029038	0.95251	7.33527e-05	-0.832459	0.0053582	-0.876698	0.00191729	0.617631	0.0763363	0.567403	0.111064	-0.655891	0.0550817	-0.549433	0.125446	-0.452692	0.221113	0.381558	0.310931	-0.426686	0.252075	0.506105	0.164474	-0.295556	0.440023	-0.439453	0.236601	-0.383297	0.308545	-0.22344	0.563326	-0.496631	0.173833	-0.100236	0.797503	-0.148304	0.70336	-0.0973226	0.803294	-0.0651232	0.8678	-0.0675484	0.862914	-0.305865	0.423453	0.0542535	0.889746
CL4668.Contig3_DB	blue	0.717522	0.0295313	-0.940501	0.000159562	0.764701	0.0163848	0.911311	0.000626641	-0.566107	0.112067	-0.488811	0.181782	0.723939	0.0274386	0.488374	0.182231	0.373354	0.322312	-0.352666	0.351913	0.515051	0.155909	-0.459208	0.2137	0.396428	0.290831	0.41905	0.26158	0.438317	0.237956	0.140784	0.717892	0.508752	0.161912	0.1169	0.764548	0.136868	0.725491	0.169631	0.66261	0.0102633	0.979094	0.0672415	0.863532	0.355054	0.348431	-0.0600559	0.878022
CL3544.Contig1_DB	blue	0.667953	0.0492665	-0.96049	3.8834e-05	0.814345	0.00753185	0.90816	0.00070586	-0.542731	0.13108	-0.522708	0.148788	0.638697	0.0640956	0.56246	0.114916	0.428822	0.24945	-0.475248	0.196047	0.448668	0.22576	-0.550411	0.124637	0.199346	0.607104	0.442244	0.233288	0.389003	0.300782	0.252727	0.511771	0.564585	0.11325	0.0410085	0.916575	0.0586649	0.880831	0.15704	0.686584	-0.00612643	0.98752	0.173065	0.656117	0.310493	0.416106	-0.100377	0.797222
CL13381.Contig1_DB	blue	0.708492	0.032649	-0.949746	8.91679e-05	0.808235	0.00838226	0.903154	0.000845683	-0.600207	0.0874845	-0.439731	0.23627	0.756554	0.0182989	0.578691	0.102564	0.362964	0.337018	-0.328158	0.388605	0.541026	0.132536	-0.479115	0.191918	0.388416	0.301576	0.44196	0.233625	0.479121	0.191912	0.236252	0.540539	0.509286	0.161398	0.15185	0.696537	0.183483	0.63654	0.204241	0.598117	0.0428969	0.912745	0.0107148	0.978174	0.388931	0.300879	-0.0156073	0.968211
Unigene41257_DB	blue	-0.717275	0.0296141	0.955899	5.67971e-05	-0.8193	0.00688691	-0.883387	0.00158803	0.630778	0.0685405	0.544781	0.129341	-0.6868	0.0409935	-0.574403	0.105744	-0.435234	0.241656	0.34876	0.357644	-0.4575	0.21563	0.508185	0.162459	-0.32028	0.400762	-0.477932	0.193176	-0.436782	0.239795	-0.227422	0.556206	-0.500764	0.169713	-0.128077	0.742623	-0.194267	0.616478	-0.132143	0.734688	-0.0869062	0.824067	-0.0273972	0.944222	-0.333359	0.380674	0.031654	0.935569
CL843.Contig4_DB	blue	0.671757	0.0475177	-0.94487	0.000122711	0.767268	0.0158107	0.880235	0.00173785	-0.550978	0.124169	-0.584237	0.0985364	0.584012	0.0986978	0.53907	0.134219	0.394526	0.293363	-0.526	0.145786	0.393495	0.294741	-0.55451	0.121277	0.13399	0.731089	0.397203	0.289802	0.379046	0.314394	0.23827	0.536983	0.548737	0.126025	-0.0188765	0.961557	0.00674154	0.986267	0.0764101	0.845094	-0.031021	0.936855	0.22343	0.563344	0.237013	0.539197	-0.0850765	0.827726
CL2794.Contig1_DB	blue	-0.678658	0.0444478	0.949342	9.16709e-05	-0.780259	0.0131103	-0.780698	0.0130248	0.706043	0.0335301	0.65175	0.0571739	-0.628806	0.0696767	-0.542534	0.131247	-0.366981	0.331294	0.269082	0.483837	-0.269162	0.483702	0.564715	0.113149	-0.295732	0.439739	-0.398485	0.288105	-0.33874	0.372549	-0.113104	0.772028	-0.484766	0.185972	0.0222043	0.954784	-0.230188	0.55128	0.0195222	0.960242	-0.0671453	0.863726	-0.084177	0.829525	-0.329822	0.386059	-0.018734	0.961847
CL5843.Contig1_DB	blue	0.738744	0.0229873	-0.910561	0.0006449	0.81748	0.00711918	0.915481	0.00053167	-0.500642	0.169834	-0.452558	0.221267	0.704983	0.0339161	0.506192	0.164389	0.508154	0.162489	-0.445547	0.229401	0.51814	0.153013	-0.399222	0.287132	0.340896	0.369317	0.363974	0.335574	0.286031	0.455581	0.190788	0.622928	0.466862	0.205171	0.142697	0.714188	0.0371402	0.924426	0.14889	0.702231	-0.119809	0.758827	0.119429	0.759575	0.289739	0.449497	-0.0819922	0.8339
CL22437.Contig1_DB	blue	0.683652	0.0423076	-0.92062	0.00042907	0.856653	0.00318246	0.911712	0.000617047	-0.526167	0.145635	-0.469438	0.202344	0.61777	0.0762511	0.529137	0.142959	0.457674	0.215433	-0.43433	0.242747	0.542713	0.131095	-0.477952	0.193155	0.266783	0.487725	0.497919	0.172543	0.483981	0.186792	0.362932	0.337064	0.516631	0.154424	0.208327	0.59065	0.106716	0.784653	0.232587	0.547022	0.196825	0.611752	0.0126188	0.974297	0.301875	0.429833	-0.144937	0.709856
CL5106.Contig3_DB	blue	0.656468	0.0547939	-0.964779	2.60852e-05	0.777497	0.0136563	0.86119	0.00285691	-0.604828	0.0844362	-0.554124	0.121591	0.654239	0.0559103	0.608016	0.0823718	0.376484	0.317945	-0.426577	0.252209	0.37795	0.31591	-0.584535	0.0983225	0.186494	0.630918	0.421108	0.259001	0.376964	0.317279	0.208617	0.590123	0.555518	0.120459	-0.0273134	0.944392	0.106538	0.785005	0.0929202	0.812061	-0.0557192	0.886783	0.184254	0.635098	0.321265	0.399233	-0.0181952	0.962943
Unigene32936_DB	blue	-0.691116	0.0392345	0.957389	5.04354e-05	-0.83018	0.00560444	-0.873343	0.002099	0.593278	0.0921807	0.565759	0.112336	-0.636894	0.0650912	-0.541289	0.132311	-0.43325	0.244053	0.415023	0.266669	-0.397763	0.28906	0.534331	0.138348	-0.252294	0.512519	-0.406539	0.277558	-0.346	0.36172	-0.214185	0.580004	-0.524691	0.146975	-0.0385475	0.921569	-0.0993146	0.799334	-0.090289	0.81731	-0.0179208	0.963502	-0.137546	0.724174	-0.308487	0.419284	0.0742737	0.849385
CL23720.Contig3_DB	blue	-0.677569	0.0449238	0.957315	5.0738e-05	-0.836436	0.00494632	-0.880609	0.00171955	0.581912	0.100213	0.569662	0.10933	-0.60557	0.0839533	-0.526538	0.145299	-0.420777	0.259414	0.430809	0.24702	-0.411659	0.270959	0.547978	0.126657	-0.230144	0.551359	-0.433395	0.243878	-0.394265	0.293713	-0.254353	0.508965	-0.541217	0.132373	-0.0538403	0.890582	-0.0933448	0.811215	-0.115863	0.76659	-0.0957634	0.806397	-0.124619	0.749392	-0.302498	0.428833	0.109542	0.779063
CL7610.Contig1_DB	blue	0.598122	0.0888819	-0.885555	0.00149036	0.782446	0.0126884	0.771913	0.0148063	-0.543256	0.130634	-0.694211	0.0380037	0.40299	0.282181	0.274818	0.474194	0.370176	0.326775	-0.355931	0.347157	0.234868	0.542984	-0.544812	0.129315	0.229914	0.551768	0.372378	0.323679	0.315249	0.408617	0.121725	0.755065	0.517694	0.153429	-0.0285607	0.941856	0.0732005	0.851541	0.0112154	0.977155	0.300061	0.432748	0.1504	0.699325	0.254191	0.509244	-0.248285	0.519466
CL4530.Contig1_DB	blue	0.632619	0.0674903	-0.967787	1.91401e-05	0.795285	0.0103946	0.894563	0.00112885	-0.538346	0.134845	-0.564394	0.113399	0.605872	0.0837565	0.552286	0.123093	0.445719	0.229199	-0.466904	0.205125	0.384616	0.306742	-0.596532	0.0899568	0.154804	0.690867	0.473363	0.198078	0.353899	0.350113	0.198783	0.608141	0.594412	0.091402	-0.0169453	0.965488	0.0711598	0.855645	0.143403	0.712821	-0.0142796	0.970915	0.222752	0.56456	0.320819	0.399925	-0.121054	0.756383
CL7482.Contig2_DB	blue	0.748232	0.0204016	-0.91736	0.000492361	0.778398	0.0134764	0.926997	0.000322106	-0.544766	0.129354	-0.42385	0.255584	0.732031	0.0249414	0.574772	0.105468	0.382989	0.308967	-0.464093	0.208234	0.597072	0.0895911	-0.415735	0.265766	0.320043	0.401132	0.393297	0.295007	0.479773	0.19122	0.298637	0.435042	0.474604	0.19674	0.17687	0.648945	0.0603694	0.877389	0.184562	0.634523	-0.0408103	0.916977	0.0516711	0.89497	0.278197	0.468553	-0.0154892	0.968452
Unigene37597_DB	blue	0.624519	0.0721863	-0.944599	0.0001248	0.752082	0.0194099	0.867791	0.00242533	-0.553251	0.122303	-0.611905	0.0798966	0.526699	0.145153	0.447722	0.22686	0.308573	0.419147	-0.458908	0.214039	0.38322	0.308651	-0.591614	0.0933312	0.168627	0.664513	0.443269	0.232078	0.485199	0.185522	0.224756	0.56097	0.585729	0.0974699	-0.0155064	0.968417	0.056231	0.885748	0.11659	0.76516	0.178086	0.646658	0.17413	0.654107	0.278167	0.468602	-0.158733	0.683345
CL952.Contig2_DB	blue	0.705757	0.0336337	-0.917617	0.000487148	0.626213	0.0711882	0.753653	0.0190147	-0.744551	0.0213806	-0.674025	0.0464943	0.695504	0.0374971	0.583764	0.0988756	0.360637	0.340356	-0.206992	0.593086	0.255178	0.507545	-0.522595	0.148892	0.322712	0.396992	0.446231	0.2286	0.358896	0.342864	-0.0370277	0.924654	0.431044	0.246734	-0.0292997	0.940354	0.31886	0.402974	-0.0673813	0.86325	-0.0817878	0.834309	0.0641062	0.86985	0.304615	0.425447	0.156103	0.688377
CL13820.Contig1_DB	blue	0.703564	0.0344373	-0.951734	7.7578e-05	0.746941	0.0207415	0.894012	0.00114898	-0.605818	0.0837919	-0.524368	0.14727	0.725974	0.0267959	0.666158	0.050106	0.487657	0.182971	-0.394571	0.293304	0.454054	0.219552	-0.52326	0.148282	0.234464	0.543697	0.531429	0.140913	0.402568	0.282732	0.18276	0.637892	0.51442	0.156504	0.0893385	0.819207	0.191146	0.622263	0.143961	0.711743	-0.101969	0.794061	0.0998689	0.798232	0.319041	0.402692	0.0332225	0.932382
CL7552.Contig1_DB	blue	-0.680532	0.0436369	0.956567	5.3881e-05	-0.807435	0.00849818	-0.854301	0.0033609	0.60936	0.0815112	0.606021	0.0836599	-0.636735	0.0651798	-0.531792	0.140591	-0.485233	0.185486	0.351071	0.354248	-0.341675	0.368154	0.545368	0.128846	-0.270411	0.481596	-0.455252	0.218184	-0.297386	0.437062	-0.121062	0.756367	-0.5206	0.150729	-0.0245281	0.950057	-0.167171	0.667274	-0.0715819	0.854796	-0.00573819	0.988311	-0.134535	0.730028	-0.330585	0.384895	0.0672633	0.863488
CL2070.Contig1_DB	blue	-0.694226	0.0379978	0.966615	2.16659e-05	-0.754259	0.0188636	-0.847591	0.00390759	0.679477	0.0440921	0.60356	0.0852662	-0.686967	0.0409242	-0.571235	0.108133	-0.369141	0.328235	0.291956	0.445875	-0.377778	0.316149	0.556984	0.119276	-0.316659	0.406408	-0.480421	0.190535	-0.442994	0.232402	-0.127056	0.744621	-0.515927	0.155084	-0.0397061	0.919218	-0.245776	0.523833	-0.0777718	0.842361	-0.0631939	0.87169	-0.0584649	0.881235	-0.354269	0.349573	-0.0153841	0.968666
CL14961.Contig1_DB	blue	-0.706291	0.03344	0.936206	0.000202774	-0.817408	0.00712854	-0.898883	0.000979343	0.539539	0.133814	0.546316	0.128048	-0.606594	0.0832888	-0.465341	0.206851	-0.397323	0.289643	0.478335	0.192747	-0.459239	0.213666	0.487374	0.183264	-0.261717	0.496337	-0.366067	0.332591	-0.391147	0.29789	-0.246591	0.522414	-0.51769	0.153433	-0.0707586	0.856452	-0.0159451	0.967524	-0.110548	0.777074	-0.057676	0.882829	-0.141222	0.717044	-0.262972	0.494198	0.130142	0.738591
CL738.Contig1_DB	blue	-0.670377	0.0481478	0.969599	1.56583e-05	-0.777199	0.0137159	-0.848976	0.00379008	0.638068	0.0644421	0.616722	0.0768949	-0.645874	0.0602282	-0.540291	0.133168	-0.403935	0.280946	0.337025	0.375131	-0.336893	0.375329	0.576755	0.103993	-0.269264	0.483531	-0.452075	0.221822	-0.361118	0.339664	-0.113952	0.770356	-0.54027	0.133185	0.010946	0.977703	-0.183021	0.637405	-0.0664	0.865227	-0.0252193	0.948651	-0.13687	0.725487	-0.345799	0.362019	0.0406806	0.91724
CL10929.Contig1_DB	blue	0.653172	0.0564501	-0.934232	0.000225157	0.862369	0.00277623	0.851408	0.00358967	-0.555651	0.120351	-0.476464	0.194743	0.672281	0.0472804	0.582991	0.0994326	0.50332	0.167194	-0.36483	0.334353	0.394198	0.293802	-0.515491	0.155494	0.269731	0.482742	0.407563	0.276231	0.241193	0.531847	0.209272	0.588928	0.513416	0.157454	0.0589354	0.880285	0.126442	0.745822	0.137022	0.725191	-0.0650179	0.868012	0.133015	0.732987	0.365635	0.333207	-0.0654152	0.867212
CL16250.Contig1_DB	blue	0.703339	0.0345205	-0.859199	0.0029968	0.825836	0.00609489	0.884038	0.00155826	-0.465615	0.206547	-0.543426	0.130489	0.539705	0.133672	0.415575	0.265968	0.646809	0.0597352	-0.425061	0.254082	0.468745	0.203102	-0.39087	0.298263	0.274484	0.474753	0.523017	0.148505	0.312749	0.412546	0.228718	0.553896	0.443863	0.231378	0.247102	0.521523	0.100019	0.797935	0.167111	0.667388	0.160331	0.680292	0.0249352	0.949229	0.220473	0.568655	-0.209886	0.587811
Unigene4935_DB	blue	-0.656159	0.0549481	0.960542	3.86578e-05	-0.791869	0.0109751	-0.802692	0.00920788	0.70043	0.035607	0.610209	0.0809703	-0.643177	0.061664	-0.574447	0.105711	-0.347091	0.360107	0.256563	0.505162	-0.32291	0.396686	0.589567	0.0947584	-0.293688	0.443055	-0.465363	0.206826	-0.427692	0.250837	-0.172013	0.658104	-0.517637	0.153482	-0.0193678	0.960557	-0.266568	0.48809	-0.0608335	0.876453	-0.14499	0.709754	-0.040852	0.916893	-0.370308	0.32659	-0.00446962	0.990895
CL15854.Contig2_DB	blue	-0.701347	0.0352623	0.952472	7.35569e-05	-0.785078	0.0121929	-0.878932	0.00180251	0.597985	0.0889746	0.585826	0.0974009	-0.625078	0.0718561	-0.582223	0.0999872	-0.425735	0.253248	0.473956	0.197437	-0.407437	0.276395	0.540644	0.132864	-0.180875	0.641423	-0.432172	0.245361	-0.395019	0.292706	-0.243893	0.52712	-0.522134	0.149315	-0.032206	0.934447	-0.0794831	0.838928	-0.0753081	0.847307	0.0109694	0.977656	-0.153281	0.693788	-0.25391	0.50973	0.039596	0.919441
CL27117.Contig1_DB	blue	0.839779	0.0046174	-0.702677	0.034766	0.704825	0.033974	0.672478	0.0471912	-0.692503	0.0386798	-0.613097	0.0791472	0.445508	0.229446	0.532975	0.139543	0.386594	0.304047	-0.456483	0.216784	0.448673	0.225755	-0.217588	0.573851	0.194613	0.615839	0.306859	0.421869	0.5535	0.1221	0.545417	0.128805	0.13889	0.721565	0.360595	0.340416	0.102663	0.792684	-0.15213	0.695998	0.327019	0.390352	-0.256326	0.505568	-0.116354	0.765624	0.135006	0.729112
CL15140.Contig3_DB	blue	-0.690435	0.039509	0.958973	4.42406e-05	-0.772086	0.0147697	-0.829989	0.00562536	0.708515	0.0326408	0.572766	0.106975	-0.704601	0.0340558	-0.612381	0.0795966	-0.35875	0.343075	0.243103	0.5285	-0.396614	0.290584	0.552027	0.123306	-0.3393	0.371709	-0.504981	0.165569	-0.48479	0.185948	-0.1788	0.645317	-0.497972	0.17249	-0.0877376	0.822405	-0.304326	0.425908	-0.0998753	0.798219	-0.123275	0.752024	0.0162618	0.966879	-0.376605	0.317777	-0.0477034	0.903003
CL24245.Contig1_DB	blue	0.710767	0.0318445	-0.938149	0.000182322	0.765172	0.0162786	0.9138	0.000568641	-0.542232	0.131505	-0.470429	0.201262	0.722351	0.0279472	0.601525	0.0866086	0.446142	0.228704	-0.460425	0.212331	0.499157	0.171309	-0.479058	0.191979	0.255509	0.506975	0.42107	0.259048	0.367975	0.329885	0.204691	0.597294	0.512962	0.157885	0.0787882	0.840322	0.0720315	0.853892	0.152988	0.69435	-0.152943	0.694437	0.151727	0.696772	0.301654	0.430188	-0.0147836	0.969889
CL14758.Contig3_DB	blue	-0.746276	0.0209181	0.909635	0.000667961	-0.728523	0.0260048	-0.854049	0.0033804	0.642976	0.0617716	0.654229	0.0559155	-0.604235	0.0848238	-0.619402	0.0752554	-0.560649	0.116347	0.420142	0.26021	-0.401454	0.284193	0.484143	0.186623	-0.174648	0.65313	-0.584041	0.098677	-0.43686	0.239701	-0.226441	0.557958	-0.438746	0.237444	-0.157568	0.685572	-0.211423	0.585015	-0.0484546	0.901482	-0.0661591	0.865712	-0.0195897	0.960105	-0.179543	0.643922	-0.0182533	0.962825
CL9595.Contig1_DB	blue	0.66533	0.0504963	-0.936523	0.000199335	0.710191	0.032047	0.877354	0.00188309	-0.595416	0.0907155	-0.626343	0.0711116	0.573002	0.106797	0.611655	0.0800545	0.45666	0.216583	-0.46931	0.202483	0.408632	0.274851	-0.577728	0.103273	0.0937518	0.810404	0.60366	0.0852006	0.514881	0.156069	0.256966	0.504469	0.542848	0.130981	0.072884	0.852178	0.159707	0.681484	0.124745	0.749144	0.10173	0.794537	0.106253	0.78557	0.227619	0.555855	-0.0455823	0.907301
CL28277.Contig2_DB	blue	-0.654703	0.055677	0.950304	8.58001e-05	-0.746028	0.0209841	-0.782618	0.0126556	0.715226	0.030305	0.670948	0.0478867	-0.58159	0.100446	-0.592385	0.0927971	-0.31768	0.404813	0.328546	0.388011	-0.283649	0.459509	0.613593	0.0788364	-0.185517	0.63274	-0.464798	0.207452	-0.465759	0.206388	-0.209665	0.588213	-0.513433	0.157438	0.0240459	0.951038	-0.225953	0.558829	-0.00145486	0.997036	-0.1513	0.697593	-0.0766163	0.84468	-0.28771	0.452822	-0.0270467	0.944934
CL2318.Contig3_DB	blue	-0.715468	0.0302226	0.950633	8.38576e-05	-0.808111	0.00840007	-0.89353	0.00116681	0.608078	0.0823324	0.480874	0.190056	-0.741947	0.0220916	-0.538595	0.13463	-0.387589	0.302697	0.304215	0.426085	-0.501148	0.169334	0.475333	0.195956	-0.4115	0.271163	-0.434669	0.242338	-0.433849	0.243329	-0.177512	0.647738	-0.500583	0.169893	-0.136188	0.726812	-0.194343	0.616337	-0.169916	0.66207	-0.0460135	0.906427	-0.0196643	0.959953	-0.386787	0.303785	0.0309911	0.936916
CL6320.Contig1_DB	blue	0.656226	0.0549148	-0.9744	8.61995e-06	0.711058	0.0317425	0.895543	0.00109362	-0.60098	0.08697	-0.5413	0.132302	0.727039	0.0264637	0.564135	0.113602	0.381836	0.310548	-0.311324	0.414793	0.426026	0.252889	-0.570618	0.108601	0.312661	0.412685	0.528271	0.143736	0.439113	0.237006	0.0593828	0.879381	0.575328	0.105054	0.0197518	0.959775	0.22417	0.562019	0.172703	0.656799	-0.0363056	0.92612	0.127506	0.743741	0.408013	0.275649	-0.0226816	0.953813
Unigene1264_DB	blue	0.678137	0.044675	-0.95599	5.63931e-05	0.700612	0.0355386	0.866304	0.00251833	-0.665697	0.0503231	-0.555592	0.120399	0.697614	0.0366798	0.701125	0.0353456	0.366442	0.332059	-0.374109	0.321255	0.44422	0.230958	-0.578823	0.102466	0.188116	0.627895	0.573921	0.106106	0.558413	0.118128	0.242205	0.530073	0.531897	0.140497	0.0722942	0.853363	0.243979	0.52697	0.139141	0.721077	0.0274941	0.944025	0.0507311	0.896873	0.312345	0.413183	0.0769029	0.844105
CL14637.Contig1_DB	blue	0.739765	0.0226992	-0.903416	0.000837925	0.729201	0.0257972	0.91342	0.000577258	-0.550942	0.124198	-0.472613	0.198889	0.746117	0.0209603	0.503518	0.167	0.487789	0.182835	-0.307088	0.421506	0.551711	0.123566	-0.39361	0.294587	0.430898	0.246912	0.518126	0.153026	0.434298	0.242786	0.104605	0.788833	0.457232	0.215934	0.223532	0.563161	0.215467	0.577684	0.203366	0.59972	0.00498719	0.98984	-0.0150991	0.969246	0.339415	0.371536	-0.0381436	0.922389
CL8997.Contig1_DB	blue	0.728158	0.026117	-0.869224	0.00233794	0.910806	0.000638908	0.881966	0.0016544	-0.50301	0.167498	-0.339253	0.37178	0.715414	0.0302411	0.573019	0.106784	0.552276	0.123102	-0.386046	0.304792	0.58139	0.100591	-0.346279	0.361308	0.376342	0.318143	0.380348	0.312597	0.303036	0.427972	0.361902	0.338539	0.40971	0.273461	0.286537	0.454749	0.0968501	0.804234	0.217661	0.573719	-5.7685e-05	0.999882	-0.0329218	0.932993	0.315081	0.408881	-0.0670929	0.863831
CL25655.Contig1_DB	blue	0.72188	0.0280991	-0.771233	0.0149504	0.870711	0.00224965	0.687089	0.040874	-0.639946	0.0634116	-0.446286	0.228536	0.617416	0.0764681	0.374814	0.320271	0.42182	0.258111	-0.0700904	0.857796	0.416529	0.264761	-0.258885	0.501178	0.598446	0.0886637	0.289483	0.449915	0.307144	0.421417	0.236084	0.540835	0.249569	0.517236	0.333241	0.380853	0.298705	0.434931	0.045839	0.906781	0.336866	0.375371	-0.274881	0.474089	0.316998	0.405879	-0.0256703	0.947734
CL14097.Contig2_DB	blue	-0.732172	0.0248993	0.950274	8.59815e-05	-0.7669	0.0158923	-0.897294	0.00103261	0.618891	0.0755666	0.521	0.150359	-0.745568	0.0211069	-0.5821	0.100077	-0.449643	0.22463	0.328024	0.38881	-0.480838	0.190094	0.478346	0.192735	-0.361845	0.33862	-0.487774	0.182851	-0.418056	0.262832	-0.142741	0.714102	-0.490431	0.180118	-0.130263	0.738354	-0.212824	0.582472	-0.143254	0.713109	0.0247998	0.949504	-0.0391376	0.920371	-0.348766	0.357635	-0.00778678	0.984138
CL25238.Contig2_DB	blue	0.62081	0.0744033	-0.952386	7.40168e-05	0.754371	0.0188359	0.898036	0.00100751	-0.505174	0.16538	-0.581693	0.100371	0.546555	0.127848	0.493611	0.176878	0.372486	0.323528	-0.535013	0.13775	0.395911	0.291518	-0.597407	0.0893641	0.105809	0.786448	0.444099	0.231101	0.416928	0.264255	0.225436	0.559754	0.607884	0.0824568	-0.0423268	0.913901	-0.00497365	0.989868	0.136504	0.726197	0.033398	0.932025	0.257397	0.503729	0.267687	0.486196	-0.161116	0.678795
CL14162.Contig1_DB	blue	-0.746828	0.0207715	0.914627	0.000550243	-0.849347	0.003759	-0.905479	0.000778543	0.569607	0.109372	0.419796	0.260644	-0.716303	0.0299403	-0.548269	0.126415	-0.396433	0.290825	0.394155	0.293859	-0.588917	0.0952143	0.40574	0.278595	-0.382748	0.309297	-0.39018	0.299192	-0.473455	0.197978	-0.33831	0.373196	-0.454812	0.218687	-0.229397	0.552687	-0.109948	0.77826	-0.191341	0.621901	-0.0904502	0.816988	0.0291164	0.940726	-0.31089	0.415479	0.046011	0.906432
CL19881.Contig1_DB	blue	0.702269	0.0349178	-0.870701	0.00225022	0.667683	0.0493924	0.83063	0.00555515	-0.589411	0.0948677	-0.654699	0.0556788	0.571443	0.107975	0.4326	0.244842	0.513559	0.157319	-0.298729	0.434893	0.381618	0.310848	-0.444859	0.230207	0.305827	0.423513	0.582134	0.100052	0.429023	0.249204	0.0598112	0.878516	0.43875	0.237439	0.161462	0.678134	0.252428	0.512288	0.0799715	0.837949	0.167283	0.667061	-0.00664476	0.986464	0.237135	0.538981	-0.0740568	0.849821
CL2227.Contig1_DB	blue	-0.712606	0.0312033	0.950724	8.33259e-05	-0.752479	0.0193095	-0.850156	0.00369188	0.680269	0.0437501	0.546881	0.127575	-0.702085	0.0349864	-0.628504	0.0698518	-0.309521	0.417645	0.355488	0.3478	-0.443975	0.231247	0.529917	0.142261	-0.281428	0.463184	-0.435902	0.240852	-0.513136	0.15772	-0.247216	0.521325	-0.492784	0.177718	-0.0713175	0.855328	-0.194586	0.615889	-0.0858775	0.826123	-0.0475515	0.903311	-0.0347987	0.92918	-0.310656	0.415848	-0.0647404	0.868572
CL14461.Contig7_DB	blue	-0.66597	0.0501946	0.967131	2.05271e-05	-0.753903	0.0189523	-0.858545	0.0030438	0.6248	0.0720205	0.637854	0.06456	-0.62643	0.0710605	-0.574223	0.105879	-0.45904	0.21389	0.378155	0.315627	-0.331191	0.383971	0.590538	0.0940795	-0.199078	0.607598	-0.513886	0.157009	-0.364643	0.33462	-0.121861	0.754798	-0.548366	0.126333	0.00794875	0.983808	-0.182696	0.638012	-0.0725934	0.852762	-0.00166597	0.996606	-0.15698	0.686697	-0.313201	0.411834	0.0392695	0.920104
CL7449.Contig1_DB	blue	0.698459	0.0363558	-0.934602	0.00022084	0.74051	0.0224905	0.942917	0.00013834	-0.509903	0.160805	-0.46521	0.206996	0.690815	0.0393558	0.502816	0.16769	0.361968	0.338445	-0.456341	0.216944	0.562853	0.114607	-0.47298	0.198492	0.300892	0.431411	0.446467	0.228324	0.498525	0.171938	0.213065	0.582035	0.54243	0.131336	0.116713	0.764916	0.0619791	0.874141	0.217186	0.574578	0.00564705	0.988496	0.112419	0.77338	0.312727	0.412581	-0.0938394	0.810229
CL13096.Contig1_DB	blue	0.723948	0.0274359	-0.893436	0.00117029	0.678202	0.0446469	0.821137	0.00665762	-0.657767	0.0541502	-0.500023	0.170448	0.766653	0.015947	0.46413	0.208193	0.289467	0.449942	-0.150575	0.698988	0.469075	0.202741	-0.406659	0.277401	0.540082	0.133347	0.413538	0.268559	0.477551	0.193582	0.0222115	0.95477	0.422144	0.257706	0.147691	0.704542	0.303801	0.426748	0.109495	0.779155	0.0668078	0.864405	-0.0732352	0.851472	0.391394	0.297559	0.0570636	0.884066
Unigene35312_DB	blue	-0.655031	0.055512	0.970939	1.33901e-05	-0.754034	0.0189196	-0.834084	0.00518722	0.681175	0.0433609	0.617461	0.0764403	-0.639009	0.0639246	-0.614759	0.0781091	-0.348683	0.357758	0.334799	0.378492	-0.349127	0.357103	0.614301	0.0783944	-0.212862	0.582403	-0.509369	0.161318	-0.477772	0.193346	-0.19698	0.611466	-0.547578	0.126991	-0.00331755	0.993242	-0.231176	0.549524	-0.081264	0.835359	-0.100934	0.796117	-0.0862751	0.825328	-0.336747	0.37555	-0.0106327	0.978341
CL14824.Contig2_DB	blue	0.707727	0.0329227	-0.927488	0.000314734	0.712032	0.0314025	0.895191	0.0011062	-0.553622	0.122	-0.540686	0.132828	0.669016	0.0487741	0.62293	0.0731312	0.469372	0.202416	-0.508218	0.162427	0.446367	0.228441	-0.501584	0.168903	0.155514	0.689506	0.459829	0.213001	0.37449	0.320723	0.198001	0.609583	0.507219	0.163393	0.0437342	0.911047	0.0645047	0.869047	0.09969	0.798588	-0.168238	0.66525	0.18567	0.632454	0.230941	0.549943	0.00691681	0.98591
CL26162.Contig1_DB	blue	-0.701342	0.0352642	0.958584	4.57081e-05	-0.698113	0.0364882	-0.855246	0.00328846	0.675835	0.0456879	0.610218	0.0809648	-0.683847	0.0422255	-0.58816	0.0957465	-0.33429	0.379263	0.337532	0.374366	-0.399327	0.286993	0.55468	0.121139	-0.273192	0.47692	-0.492026	0.178489	-0.502419	0.16808	-0.137208	0.72483	-0.515626	0.155367	-0.0320838	0.934695	-0.223252	0.563663	-0.0730092	0.851926	-0.0364948	0.925736	-0.0725325	0.852884	-0.313017	0.412124	-0.0438326	0.910848
CL8581.Contig3_DB	blue	-0.696123	0.0372563	0.936784	0.000196535	-0.753092	0.0191551	-0.870968	0.00223459	0.558748	0.11786	0.599437	0.0879995	-0.614957	0.0779865	-0.480161	0.190809	-0.421045	0.25908	0.454032	0.219577	-0.372906	0.32294	0.510611	0.160126	-0.234294	0.543999	-0.371603	0.324768	-0.311533	0.414464	-0.120977	0.756534	-0.516133	0.154891	0.0127786	0.973971	-0.0426521	0.913241	-0.0461324	0.906186	0.0709302	0.856107	-0.208491	0.590352	-0.259604	0.499947	0.0794163	0.839062
Unigene29333_DB	blue	-0.653653	0.0562065	0.942969	0.000137912	-0.742765	0.0218666	-0.842246	0.00438442	0.574083	0.105984	0.652487	0.0567981	-0.554155	0.121566	-0.431691	0.245946	-0.362565	0.337588	0.426449	0.252367	-0.307366	0.421064	0.564979	0.112943	-0.210243	0.587161	-0.37642	0.318034	-0.335804	0.376973	-0.09968	0.798607	-0.54723	0.127282	0.0706764	0.856617	-0.0568706	0.884456	-0.024909	0.949282	-0.0289152	0.941135	-0.225068	0.560412	-0.272279	0.478453	0.117157	0.764042
Unigene1748_DB	blue	0.676146	0.04555	-0.935367	0.000212087	0.758419	0.0178482	0.897996	0.00100884	-0.565894	0.112232	-0.538627	0.134602	0.641969	0.0623138	0.671117	0.0478095	0.533644	0.138953	-0.468685	0.203168	0.45778	0.215314	-0.542243	0.131496	0.124448	0.749725	0.594	0.0916847	0.438317	0.237957	0.279699	0.466053	0.529998	0.142188	0.117529	0.763311	0.155475	0.68958	0.172848	0.656527	-0.0107089	0.978186	0.102487	0.793034	0.264081	0.49231	-0.0263875	0.946275
CL4317.Contig1_DB	blue	0.678336	0.0445882	-0.931339	0.000261017	0.833968	0.0051992	0.864248	0.00265092	-0.587404	0.0962803	-0.390991	0.2981	0.788269	0.01161	0.609712	0.0812866	0.439323	0.236755	-0.257292	0.50391	0.489874	0.180689	-0.466516	0.205552	0.41464	0.267156	0.425174	0.253943	0.333326	0.380724	0.181316	0.640596	0.488215	0.182396	0.139225	0.720915	0.223505	0.56321	0.202519	0.601274	-0.0637659	0.870536	0.0218685	0.955468	0.442038	0.233532	0.00863987	0.9824
CL20242.Contig1_DB	blue	0.572758	0.106981	-0.983873	1.72649e-06	0.716334	0.0299302	0.824713	0.00622636	-0.645102	0.0606369	-0.624074	0.0724501	0.605	0.0843243	0.560572	0.116408	0.27692	0.470682	-0.313121	0.411961	0.293256	0.443758	-0.690372	0.0395344	0.182822	0.637777	0.517586	0.15353	0.474917	0.196403	0.11869	0.761027	0.625235	0.0717636	-0.101592	0.794811	0.221828	0.56622	0.11184	0.774522	0.11037	0.777426	0.172715	0.656778	0.398367	0.288261	-0.0481375	0.902124
CL18504.Contig1_DB	blue	-0.656539	0.0547586	0.955335	5.93476e-05	-0.83176	0.00543284	-0.915232	0.000537031	0.522695	0.1488	0.533531	0.139053	-0.599958	0.0876512	-0.48839	0.182215	-0.428992	0.249241	0.45032	0.223846	-0.460917	0.211779	0.544583	0.129509	-0.235076	0.542616	-0.468915	0.202916	-0.422002	0.257884	-0.253184	0.510981	-0.574091	0.105978	-0.0780916	0.841719	-0.0703739	0.857226	-0.189586	0.62516	-0.121659	0.755195	-0.135813	0.727541	-0.323031	0.396497	0.173673	0.654969
CL1209.Contig3_DB	blue	-0.768703	0.0154956	0.899009	0.000975213	-0.82792	0.00585614	-0.883494	0.00158311	0.563998	0.113709	0.411431	0.271251	-0.765454	0.016215	-0.529093	0.142998	-0.436253	0.240429	0.35778	0.344477	-0.545382	0.128834	0.356047	0.346988	-0.445006	0.230035	-0.308999	0.418472	-0.325131	0.393256	-0.211733	0.584452	-0.41222	0.270241	-0.188474	0.627229	-0.0994105	0.799143	-0.129505	0.739834	0.0909553	0.81598	-0.0189717	0.961363	-0.318549	0.403457	0.00107812	0.997804
CL4646.Contig2_DB	blue	-0.65136	0.0573736	0.981689	2.68685e-06	-0.769321	0.0153612	-0.867746	0.0024281	0.635843	0.0656763	0.568446	0.110261	-0.688955	0.040109	-0.571035	0.108285	-0.374112	0.321252	0.304742	0.425245	-0.382709	0.309351	0.59458	0.091287	-0.293783	0.442901	-0.498262	0.1722	-0.423297	0.256271	-0.12156	0.75539	-0.569169	0.109707	-0.00892057	0.981828	-0.225192	0.56019	-0.13523	0.728675	-0.0403505	0.91791	-0.110504	0.777162	-0.401817	0.283717	0.0313666	0.936153
CL643.Contig1_DB	blue	-0.627708	0.0703139	0.972584	1.09377e-05	-0.752898	0.0192039	-0.828099	0.00583592	0.631702	0.0680123	0.642443	0.062058	-0.616389	0.0770998	-0.519956	0.151325	-0.381669	0.310778	0.322443	0.397407	-0.276351	0.47163	0.620565	0.0745513	-0.236336	0.540391	-0.454806	0.218693	-0.334489	0.378961	-0.0620193	0.87406	-0.570501	0.10869	0.0801036	0.837684	-0.185165	0.633396	-0.0530965	0.892087	-0.0169147	0.96555	-0.18869	0.626827	-0.364066	0.335443	0.057632	0.882917
CL352.Contig1_DB	blue	0.562839	0.114618	-0.932046	0.00025191	0.798526	0.0098634	0.801427	0.00940361	-0.572451	0.107212	-0.622729	0.0732511	0.457781	0.215312	0.525763	0.146001	0.345557	0.362376	-0.460185	0.212601	0.284902	0.45744	-0.653528	0.0562693	0.0447817	0.908924	0.454611	0.218915	0.419481	0.26104	0.314692	0.409491	0.588692	0.0953725	-0.059305	0.879538	0.0714871	0.854986	0.0837875	0.830305	0.206769	0.593495	0.189767	0.624824	0.268478	0.484858	-0.145801	0.708188
CL21377.Contig2_DB	blue	-0.697374	0.0367722	0.955027	6.07734e-05	-0.790167	0.0112721	-0.874127	0.00205551	0.608273	0.0822072	0.49564	0.174829	-0.748499	0.0203317	-0.561369	0.115777	-0.406454	0.277667	0.305849	0.423479	-0.437438	0.239008	0.500141	0.170331	-0.376253	0.318266	-0.410302	0.2727	-0.344949	0.363278	-0.114409	0.769455	-0.509364	0.161323	-0.0607046	0.876713	-0.18375	0.636041	-0.130003	0.738862	0.0726682	0.852611	-0.0932629	0.811378	-0.393543	0.294677	0.0043018	0.991237
CL18869.Contig1_DB	blue	-0.673034	0.0469398	0.956097	5.59227e-05	-0.768338	0.0155754	-0.809567	0.00819161	0.682887	0.0426312	0.584697	0.0982065	-0.692679	0.0386098	-0.651693	0.0572033	-0.420756	0.259441	0.3041	0.42627	-0.317026	0.405835	0.571369	0.108031	-0.248292	0.519454	-0.450952	0.223116	-0.330304	0.385323	-0.138712	0.721909	-0.501154	0.169327	0.00803841	0.983625	-0.235559	0.541762	-0.0385642	0.921535	0.0674618	0.863088	-0.108418	0.781285	-0.347613	0.359336	-0.0688465	0.8603
Unigene34817_DB	blue	-0.619928	0.0749364	0.953426	6.8582e-05	-0.787296	0.0117857	-0.852488	0.00350308	0.542545	0.131239	0.635972	0.065604	-0.529608	0.142537	-0.431129	0.24663	-0.393717	0.294444	0.442686	0.232767	-0.301435	0.430539	0.596749	0.0898097	-0.177456	0.647843	-0.396641	0.290548	-0.310382	0.416281	-0.133445	0.73215	-0.583496	0.0990689	0.0776625	0.84258	-0.0397852	0.919057	-0.0654185	0.867205	-0.0586151	0.880932	-0.250387	0.515819	-0.298257	0.435654	0.173913	0.654516
CL10673.Contig1_DB	blue	-0.671167	0.0477865	0.970312	1.44206e-05	-0.805402	0.00879768	-0.894844	0.00111867	0.600022	0.0876079	0.491097	0.179437	-0.710557	0.0319182	-0.573183	0.10666	-0.355262	0.348129	0.351846	0.353112	-0.472023	0.199529	0.547056	0.127428	-0.316615	0.406478	-0.452091	0.221804	-0.454138	0.219457	-0.214125	0.580113	-0.555649	0.120353	-0.0690804	0.859829	-0.165014	0.671372	-0.181713	0.639852	-0.0439921	0.910525	-0.0846323	0.828614	-0.391639	0.29723	0.0456739	0.907115
CL18220.Contig1_DB	blue	0.713419	0.0309226	-0.766302	0.0160251	0.758285	0.0178805	0.656224	0.0549154	-0.661215	0.0524641	-0.638359	0.0642818	0.375792	0.318909	0.571268	0.108107	0.333344	0.380697	-0.536575	0.136384	0.300245	0.432451	-0.405213	0.27928	0.00885357	0.981965	0.25349	0.510453	0.434437	0.242617	0.553335	0.122234	0.284616	0.457913	0.117693	0.762988	-8.84528e-05	0.99982	-0.164408	0.672523	0.235226	0.54235	-0.0207884	0.957666	-0.0501189	0.898112	0.0640098	0.870045
CL11212.Contig1_DB	blue	0.781535	0.012863	-0.880988	0.00170121	0.673495	0.0467325	0.882058	0.00165006	-0.580696	0.101096	-0.458466	0.214537	0.773145	0.0145472	0.560147	0.116745	0.384989	0.306232	-0.390395	0.298904	0.549393	0.12548	-0.355533	0.347734	0.382436	0.309726	0.369244	0.32809	0.426301	0.25255	0.142334	0.71489	0.402673	0.282595	0.158881	0.683062	0.117989	0.762406	0.0980379	0.801872	-0.168154	0.665409	0.0388963	0.920861	0.2513	0.514237	0.0854165	0.827046
CL9145.Contig1_DB	blue	0.661627	0.0522647	-0.925618	0.000343433	0.819315	0.00688496	0.849899	0.00371316	-0.608159	0.0822799	-0.381422	0.311118	0.743491	0.0216682	0.570754	0.108498	0.24853	0.519041	-0.279396	0.466556	0.528399	0.143621	-0.485251	0.185467	0.405915	0.278368	0.367777	0.330165	0.503156	0.167355	0.291518	0.44659	0.502487	0.168013	0.131282	0.736365	0.183405	0.636686	0.208104	0.591057	0.103493	0.791038	-0.0186289	0.96206	0.422925	0.256733	-0.00137397	0.997201
CL4392.Contig1_DB	blue	0.665916	0.0502197	-0.918169	0.000476077	0.684082	0.0421266	0.750424	0.0198329	-0.696	0.0373041	-0.56796	0.110635	0.692637	0.0386268	0.598719	0.0884802	0.237212	0.538845	-0.295848	0.43955	0.287546	0.453092	-0.539559	0.133798	0.275198	0.473559	0.288655	0.451271	0.342298	0.367224	0.094016	0.809877	0.46428	0.208026	-0.0960579	0.805811	0.171812	0.658483	-0.0455578	0.907351	-0.139721	0.719952	0.145465	0.708837	0.317848	0.404551	0.137055	0.725128
CL12507.Contig2_DB	blue	0.627679	0.0703308	-0.951377	7.95715e-05	0.676566	0.0453647	0.891518	0.0012433	-0.553635	0.12199	-0.622316	0.0734982	0.586047	0.0972434	0.48328	0.187525	0.380465	0.312435	-0.408243	0.275353	0.39173	0.297107	-0.594089	0.0916232	0.189457	0.6254	0.563628	0.113999	0.490035	0.180524	0.101318	0.795355	0.596158	0.0902106	1.018e-05	0.999979	0.148593	0.702804	0.153717	0.692951	0.0920802	0.813736	0.169606	0.662657	0.311248	0.414913	-0.118863	0.760688
CL6166.Contig1_DB	blue	0.607203	0.0828957	-0.946014	0.000114154	0.873774	0.00207501	0.907511	0.000722993	-0.492779	0.177723	-0.422602	0.257135	0.656067	0.0549941	0.505245	0.165311	0.451962	0.221952	-0.34508	0.363085	0.492918	0.177582	-0.537094	0.135932	0.316561	0.406562	0.497795	0.172667	0.386783	0.30379	0.245429	0.524437	0.586263	0.0970898	0.125753	0.74717	0.143108	0.713393	0.290006	0.44906	0.129872	0.739117	0.0830353	0.831811	0.437882	0.238476	-0.188221	0.627699
CL19347.Contig1_DB	blue	-0.635706	0.0657523	0.952681	7.24435e-05	-0.779408	0.0132768	-0.863064	0.00272939	0.575079	0.105239	0.640243	0.0632501	-0.569546	0.109419	-0.499911	0.170559	-0.508932	0.161738	0.363535	0.336201	-0.329613	0.386379	0.586225	0.0971169	-0.206764	0.593503	-0.558185	0.118311	-0.352165	0.352645	-0.119606	0.759228	-0.562863	0.114599	-0.0290659	0.940829	-0.185099	0.633521	-0.118565	0.761272	-0.110723	0.776728	-0.140089	0.71924	-0.324845	0.393697	0.137368	0.724519
CL25402.Contig1_DB	blue	-0.659024	0.0535315	0.972356	1.12561e-05	-0.73965	0.0227314	-0.882512	0.00162867	0.615384	0.0777211	0.611432	0.0801952	-0.630865	0.0684907	-0.584595	0.09828	-0.407149	0.276767	0.401299	0.284397	-0.388535	0.301415	0.601306	0.0867534	-0.187143	0.629708	-0.544054	0.129957	-0.465277	0.206922	-0.174784	0.652874	-0.572172	0.107423	-0.0160501	0.96731	-0.177309	0.648119	-0.124268	0.750078	-0.0566556	0.88489	-0.136136	0.726913	-0.317359	0.405315	0.0473052	0.90381
CL11770.Contig2_DB	blue	-0.696362	0.0371634	0.958206	4.71706e-05	-0.771443	0.0149058	-0.929451	0.000286471	0.555402	0.120553	0.517922	0.153216	-0.687812	0.0405766	-0.540208	0.133239	-0.42674	0.252008	0.413776	0.268255	-0.500577	0.169899	0.513885	0.15701	-0.28904	0.450641	-0.496973	0.17349	-0.453864	0.219769	-0.188226	0.627691	-0.548763	0.126003	-0.102173	0.793658	-0.128796	0.741218	-0.190197	0.624025	-0.0208584	0.957523	-0.104761	0.788524	-0.334342	0.379184	0.0817843	0.834316
CL29373.Contig3_DB	blue	-0.734492	0.0242129	0.890878	0.00126835	-0.691058	0.0392578	-0.738526	0.0230491	0.733633	0.0244657	0.589353	0.094908	-0.72304	0.0277259	-0.511152	0.159609	-0.284137	0.458703	0.171861	0.658392	-0.313473	0.411406	0.435665	0.241137	-0.456308	0.216982	-0.292182	0.445507	-0.337327	0.374676	-0.0139005	0.971687	-0.37637	0.318104	-0.0238612	0.951413	-0.267468	0.486565	0.0700961	0.857785	0.0432578	0.912013	-0.00205158	0.995821	-0.323059	0.396454	-0.142416	0.714731
CL7445.Contig1_DB	blue	-0.625972	0.0713296	0.960848	3.76279e-05	-0.783955	0.0124027	-0.8055	0.00878308	0.64904	0.05857	0.636285	0.06543	-0.595289	0.0908023	-0.609021	0.0817279	-0.434865	0.242101	0.357334	0.345122	-0.262353	0.495253	0.628227	0.0700125	-0.152339	0.695597	-0.476602	0.194596	-0.320574	0.400306	-0.165065	0.671274	-0.547512	0.127046	0.0562874	0.885635	-0.189073	0.626114	-0.0377157	0.923257	-0.0144865	0.970494	-0.16825	0.665227	-0.323826	0.39527	0.0196039	0.960076
Unigene1078_DB	blue	0.540198	0.133247	-0.893711	0.0011601	0.792264	0.0109068	0.667994	0.0492474	-0.643884	0.0612851	-0.645891	0.0602191	0.503943	0.166583	0.361741	0.338771	0.302879	0.428224	-0.136382	0.726436	0.109394	0.779355	-0.593477	0.0920439	0.330395	0.385185	0.306474	0.422483	0.190636	0.623209	0.00530739	0.989188	0.501983	0.168509	-0.127537	0.743679	0.229423	0.552642	-0.0399709	0.91868	0.184757	0.634158	0.129588	0.739672	0.407961	0.275717	-0.108024	0.782064
CL15327.Contig1_DB	blue	0.551567	0.123684	-0.938948	0.000174348	0.762002	0.0170033	0.723001	0.0277384	-0.647589	0.0593264	-0.63934	0.0637432	0.575466	0.104951	0.493355	0.177139	0.353378	0.350872	-0.209948	0.587697	0.136348	0.726502	-0.645381	0.0604892	0.244883	0.525391	0.380507	0.312377	0.198322	0.608991	-0.00255675	0.994791	0.551273	0.123926	-0.166708	0.668152	0.226806	0.557306	-0.009939	0.979754	0.007827	0.984056	0.207887	0.591454	0.414318	0.267565	-0.0442322	0.910038
CL13195.Contig1_DB	blue	0.684104	0.0421175	-0.933136	0.000238302	0.723503	0.0275776	0.89202	0.00122389	-0.552969	0.122533	-0.522809	0.148695	0.661885	0.0521406	0.655171	0.0554418	0.447778	0.226795	-0.521531	0.14987	0.447076	0.227613	-0.531023	0.141274	0.11712	0.764116	0.467628	0.204328	0.396501	0.290734	0.24568	0.524	0.528089	0.143899	0.0306803	0.937548	0.0597526	0.878635	0.11922	0.759986	-0.153092	0.69415	0.1934	0.618084	0.241859	0.530679	0.00777432	0.984163
Unigene43380_DB	blue	0.65581	0.055122	-0.857204	0.00314163	0.887821	0.0013928	0.861156	0.00285923	-0.475994	0.195246	-0.382009	0.310311	0.570183	0.108933	0.392807	0.295663	0.333465	0.380514	-0.392243	0.296419	0.573391	0.106504	-0.398508	0.288075	0.364443	0.334905	0.34428	0.364272	0.486605	0.18406	0.420075	0.260294	0.470072	0.201651	0.244966	0.525246	0.0385374	0.921589	0.242275	0.529951	0.323217	0.39621	-0.0457816	0.906897	0.30839	0.419438	-0.209317	0.588847
Unigene42698_DB	blue	0.590096	0.0943882	-0.971754	1.21308e-05	0.770286	0.015153	0.834263	0.00516857	-0.625004	0.0719	-0.485951	0.184739	0.695955	0.0373217	0.561436	0.115723	0.221757	0.566347	-0.271024	0.480564	0.389139	0.300599	-0.619621	0.0751225	0.311219	0.414959	0.413843	0.26817	0.462267	0.210268	0.1639	0.67349	0.595768	0.0904762	-0.041625	0.915325	0.201388	0.60335	0.168013	0.665676	0.0656325	0.866774	0.119205	0.760015	0.462765	0.209712	-0.0267546	0.945529
CL9394.Contig3_DB	blue	-0.667207	0.0496146	0.956329	5.4905e-05	-0.753563	0.0190372	-0.897401	0.00102896	0.581256	0.100689	0.56626	0.111948	-0.621598	0.0739285	-0.509114	0.161563	-0.336361	0.376132	0.414313	0.267572	-0.455827	0.217529	0.557031	0.119237	-0.245809	0.523775	-0.485189	0.185532	-0.52157	0.149834	-0.218715	0.571819	-0.56457	0.113262	-0.0579128	0.88235	-0.124496	0.749631	-0.157875	0.684986	-0.135628	0.727902	-0.104026	0.789981	-0.314526	0.409752	0.0964377	0.805055
Unigene37954_DB	blue	-0.625343	0.0716999	0.94583	0.000115501	-0.780223	0.0131172	-0.873325	0.00210002	0.539635	0.133732	0.632642	0.0674773	-0.524747	0.146925	-0.419547	0.260956	-0.423592	0.255904	0.408566	0.274935	-0.357575	0.344773	0.58044	0.101283	-0.208108	0.591049	-0.500217	0.170256	-0.405314	0.279149	-0.157043	0.686577	-0.58059	0.101174	-0.0173107	0.964744	-0.107138	0.783818	-0.130214	0.73845	-0.187864	0.628364	-0.158516	0.683759	-0.305843	0.423488	0.201155	0.603778
CL5005.Contig2_DB	blue	0.639469	0.0636726	-0.902013	0.000880062	0.789031	0.0114736	0.885961	0.00147253	-0.412486	0.269901	-0.508923	0.161747	0.561507	0.115668	0.344199	0.364393	0.416568	0.264711	-0.510797	0.159949	0.401439	0.284213	-0.47201	0.199542	0.245874	0.523662	0.272595	0.477923	0.212787	0.582539	0.119434	0.759565	0.546198	0.128147	-0.0309894	0.936919	-0.104416	0.789209	0.113399	0.771447	-0.0899803	0.817926	0.297185	0.437385	0.277473	0.469759	-0.228859	0.553646
CL4463.Contig1_DB	blue	0.638911	0.0639782	-0.93995	0.0001647	0.70501	0.0339062	0.906237	0.000757492	-0.523721	0.14786	-0.564773	0.113104	0.571653	0.107816	0.523507	0.148056	0.334925	0.378301	-0.525328	0.146396	0.456019	0.217311	-0.575282	0.105088	0.117973	0.762437	0.493513	0.176978	0.530697	0.141565	0.254221	0.509193	0.589885	0.0945359	0.0149938	0.969461	0.0365515	0.925621	0.16443	0.672482	0.0731688	0.851605	0.188936	0.62637	0.251813	0.51335	-0.114445	0.769384
CL875.Contig2_DB	blue	-0.676407	0.0454349	0.975021	7.91501e-06	-0.76612	0.0160657	-0.882236	0.00164167	0.631142	0.0683319	0.527816	0.144146	-0.730171	0.0255016	-0.61948	0.0752081	-0.394057	0.29399	0.328941	0.387407	-0.429947	0.248072	0.562657	0.114761	-0.295342	0.44037	-0.495011	0.175462	-0.427487	0.251088	-0.152376	0.695526	-0.547964	0.126669	-0.0443694	0.90976	-0.215651	0.57735	-0.148892	0.702227	0.0271198	0.944786	-0.0966552	0.804622	-0.387721	0.302517	-0.00961659	0.980411
CL4932.Contig2_DB	blue	-0.652772	0.0566532	0.979545	3.95065e-06	-0.731979	0.0249571	-0.856354	0.00320482	0.662553	0.0518189	0.592766	0.0925337	-0.675762	0.0457204	-0.61175	0.0799944	-0.33802	0.373632	0.331845	0.382975	-0.374396	0.320855	0.613478	0.0789086	-0.236769	0.539626	-0.514121	0.156787	-0.480377	0.190581	-0.15304	0.694251	-0.566488	0.111771	0.00741581	0.984893	-0.228139	0.554928	-0.110783	0.776609	-0.0441937	0.910116	-0.109951	0.778254	-0.364772	0.334435	-0.0121298	0.975292
Unigene3727_DB	blue	0.670138	0.0482572	-0.892036	0.00122328	0.568124	0.110509	0.687219	0.0408205	-0.769297	0.0153666	-0.758264	0.0178853	0.593012	0.092364	0.648702	0.0587454	0.356448	0.346406	-0.287906	0.4525	0.138994	0.721364	-0.578981	0.10235	0.124227	0.750159	0.451702	0.222251	0.342204	0.367364	0.0119625	0.975633	0.421098	0.259013	-0.122258	0.754019	0.282777	0.460951	-0.170651	0.660679	-0.113302	0.771638	0.134476	0.730143	0.196447	0.612449	0.208046	0.591163
CL24292.Contig1_DB	blue	0.582433	0.0998352	-0.769993	0.015216	0.817809	0.00707685	0.550333	0.124702	-0.613661	0.0787941	-0.74474	0.0213296	0.272509	0.478066	0.333895	0.379861	0.424738	0.254482	-0.338856	0.372375	-0.0147967	0.969862	-0.482655	0.188181	0.0995326	0.7989	0.14792	0.7041	0.0203823	0.958492	0.198803	0.608105	0.3359	0.376827	-0.112069	0.77407	0.0282157	0.942558	-0.270237	0.481889	0.18758	0.628894	0.158969	0.682894	0.0981303	0.801688	-0.109347	0.779449
Unigene31418_DB	blue	0.613746	0.0787406	-0.92396	0.000370372	0.73066	0.0253536	0.840886	0.0045118	-0.569289	0.109615	-0.624374	0.0722723	0.493363	0.17713	0.607525	0.0826878	0.399147	0.28723	-0.541435	0.132186	0.353683	0.350428	-0.61958	0.0751472	-0.0160393	0.967332	0.526875	0.144994	0.484233	0.186528	0.33917	0.371905	0.564691	0.113167	-0.00689292	0.985958	0.0646133	0.868828	0.0924174	0.813064	0.110801	0.776575	0.182241	0.638863	0.192592	0.619581	-0.0767333	0.844445
Unigene5694_DB	blue	-0.715112	0.0303434	0.944999	0.000121728	-0.801178	0.00944251	-0.934179	0.000225782	0.553029	0.122485	0.44537	0.229609	-0.732263	0.0248721	-0.549775	0.125163	-0.407525	0.27628	0.38761	0.302667	-0.567776	0.110777	0.46462	0.207649	-0.358638	0.343237	-0.465082	0.207138	-0.477095	0.194069	-0.23921	0.535329	-0.51929	0.151943	-0.169583	0.6627	-0.136126	0.726933	-0.226367	0.55809	-0.0361583	0.926419	-0.0389731	0.920705	-0.355818	0.347321	0.064236	0.869589
CL11178.Contig1_DB	blue	-0.704	0.0342766	0.928667	0.000297535	-0.789474	0.0113948	-0.87094	0.00223624	0.620772	0.0744261	0.459189	0.213721	-0.742171	0.0220297	-0.497221	0.173241	-0.326411	0.391286	0.226673	0.557542	-0.52209	0.149356	0.452466	0.221373	-0.481996	0.188874	-0.442854	0.232568	-0.502767	0.167737	-0.173089	0.656072	-0.48182	0.189059	-0.180205	0.64268	-0.250441	0.515725	-0.193912	0.617135	-0.154612	0.691233	0.0624033	0.873285	-0.41429	0.2676	0.0307945	0.937316
CL8603.Contig1_DB	blue	-0.645476	0.0604385	0.968863	1.70125e-05	-0.793356	0.0107198	-0.879875	0.00175554	0.571662	0.107809	0.556724	0.119485	-0.632096	0.0677875	-0.576115	0.104467	-0.407218	0.276678	0.445366	0.229613	-0.383781	0.307883	0.590558	0.0940659	-0.177848	0.647106	-0.440792	0.235008	-0.364525	0.334788	-0.205704	0.59544	-0.576721	0.104017	0.0220738	0.95505	-0.0861587	0.825561	-0.119895	0.758659	0.0308904	0.937121	-0.203153	0.60011	-0.325758	0.39229	0.0738828	0.85017
CL1684.Contig2_DB	blue	0.576228	0.104384	-0.851569	0.00357668	0.916637	0.00050723	0.71837	0.0292491	-0.528432	0.143591	-0.520295	0.151012	0.439989	0.235963	0.451367	0.222637	0.39825	0.288415	-0.415275	0.26635	0.255862	0.506367	-0.51462	0.156316	0.15012	0.699864	0.228927	0.553524	0.181887	0.639527	0.365313	0.333665	0.464831	0.207415	-0.00699555	0.985749	-0.0105847	0.978439	0.0146885	0.970082	0.154949	0.690589	0.149536	0.700987	0.251359	0.514136	-0.163566	0.674125
CL5525.Contig5_DB	blue	0.704644	0.03404	-0.91779	0.000483654	0.721282	0.0282931	0.927343	0.0003169	-0.56324	0.114303	-0.464538	0.20774	0.701191	0.0353208	0.623137	0.0730077	0.429559	0.248547	-0.411167	0.27159	0.592181	0.0929382	-0.474056	0.19733	0.25923	0.500587	0.604186	0.0848561	0.603742	0.0851466	0.296819	0.437979	0.508501	0.162154	0.226689	0.557515	0.196747	0.611895	0.254851	0.508107	0.0982279	0.801494	-0.0205912	0.958067	0.295962	0.439365	-0.0179153	0.963513
CL7552.Contig2_DB	blue	-0.641688	0.0624653	0.953277	6.93433e-05	-0.833128	0.00528727	-0.897339	0.00103108	0.532387	0.140063	0.506157	0.164423	-0.656389	0.0548334	-0.446099	0.228754	-0.444736	0.230352	0.306208	0.422906	-0.44147	0.234204	0.526055	0.145736	-0.369826	0.327269	-0.47906	0.191976	-0.362406	0.337816	-0.126538	0.745634	-0.565168	0.112796	-0.0911789	0.815534	-0.168848	0.664093	-0.213786	0.580728	-0.115297	0.767705	-0.0916782	0.814538	-0.421762	0.258184	0.171959	0.658206
CL13733.Contig1_DB	blue	0.69211	0.0388365	-0.924855	0.000355653	0.745273	0.0211861	0.913831	0.000567945	-0.528383	0.143635	-0.389494	0.300118	0.764109	0.0165193	0.484164	0.186601	0.275188	0.473576	-0.351849	0.353108	0.575649	0.104814	-0.439756	0.23624	0.429403	0.248738	0.357235	0.345265	0.474608	0.196735	0.163872	0.673544	0.519269	0.151962	0.111363	0.775465	0.0975496	0.802843	0.223231	0.563701	-0.0321254	0.934611	0.0746147	0.8487	0.392505	0.296067	-0.0487917	0.900799
CL6963.Contig2_DB	blue	0.556198	0.119909	-0.926088	0.000336052	0.823552	0.0063642	0.776081	0.013942	-0.566161	0.112025	-0.552326	0.12306	0.509815	0.16089	0.514215	0.156698	0.279845	0.465811	-0.429135	0.249066	0.274426	0.474851	-0.628324	0.069956	0.113346	0.771552	0.312377	0.413132	0.326604	0.390989	0.285892	0.45581	0.573398	0.106498	-0.111822	0.774559	0.0267363	0.945566	0.0592696	0.87961	0.0895402	0.818805	0.228552	0.554191	0.31514	0.408788	-0.11483	0.768626
CL26253.Contig1_DB	blue	0.666917	0.0497498	-0.767208	0.015824	0.834325	0.00516209	0.670953	0.0478844	-0.528626	0.143417	-0.578943	0.102378	0.497775	0.172687	0.27156	0.479662	0.614637	0.0781851	-0.177713	0.647359	0.203817	0.598893	-0.308342	0.419514	0.439977	0.235977	0.254317	0.509026	-0.0334652	0.931889	0.00448973	0.990854	0.295469	0.440164	0.125643	0.747385	0.158268	0.684234	-0.0706293	0.856712	0.0733915	0.851157	0.017617	0.96412	0.253454	0.510515	-0.142049	0.715442
CL12258.Contig1_DB	blue	0.649253	0.0584595	-0.890249	0.00129329	0.782125	0.0127497	0.892847	0.00119239	-0.459248	0.213655	-0.437452	0.238992	0.618965	0.0755212	0.295115	0.440739	0.285876	0.455836	-0.347073	0.360133	0.532484	0.139977	-0.425533	0.253499	0.440476	0.235384	0.341323	0.368679	0.450217	0.223965	0.16094	0.67913	0.525647	0.146106	0.128053	0.74267	0.0466124	0.905214	0.22751	0.556049	0.188442	0.627288	0.0675068	0.862997	0.368033	0.329802	-0.224547	0.561343
CL7445.Contig2_DB	blue	-0.650625	0.0577508	0.967246	2.02788e-05	-0.819831	0.00682012	-0.894826	0.00111932	0.560962	0.116099	0.501666	0.168822	-0.662718	0.05174	-0.580164	0.101485	-0.395829	0.291628	0.430148	0.247827	-0.439758	0.236238	0.567803	0.110756	-0.223905	0.562493	-0.435866	0.240896	-0.392253	0.296406	-0.244338	0.526342	-0.573331	0.106549	-0.0262996	0.946454	-0.0918738	0.814148	-0.167062	0.66748	0.00558879	0.988615	-0.161709	0.677664	-0.353817	0.350232	0.0797822	0.838329
CL2018.Contig1_DB	blue	-0.717237	0.0296266	0.927805	0.000310042	-0.754328	0.0188465	-0.881585	0.00167254	0.583411	0.0991296	0.476618	0.194579	-0.748695	0.0202807	-0.465691	0.206463	-0.346587	0.360852	0.285189	0.456968	-0.491962	0.178554	0.436569	0.24005	-0.462802	0.209672	-0.374744	0.320369	-0.40061	0.285301	-0.0829335	0.832015	-0.482695	0.188139	-0.106354	0.78537	-0.167255	0.667115	-0.144483	0.710734	0.0143139	0.970845	-0.0487705	0.900842	-0.383044	0.308892	0.0316748	0.935527
CL19138.Contig1_DB	blue	-0.686626	0.0410654	0.962276	3.30886e-05	-0.773014	0.0145744	-0.867066	0.00247032	0.634926	0.0661888	0.493236	0.177259	-0.766398	0.0160038	-0.615753	0.0774928	-0.392856	0.295597	0.287385	0.453355	-0.433624	0.243601	0.526717	0.145137	-0.35493	0.348612	-0.449412	0.224897	-0.381477	0.311042	-0.124995	0.748654	-0.518137	0.153016	-0.0554821	0.887262	-0.227086	0.556806	-0.139063	0.721229	0.0756389	0.846643	-0.0783687	0.841163	-0.408384	0.27517	-0.0369821	0.924747
CL10535.Contig1_DB	blue	-0.580711	0.101085	0.93753	0.000188676	-0.805109	0.00884142	-0.775717	0.0140161	0.617975	0.0761258	0.661854	0.0521552	-0.471101	0.20053	-0.497478	0.172984	-0.34106	0.369073	0.390526	0.298727	-0.236167	0.54069	0.645871	0.0602297	-0.111953	0.7743	-0.422672	0.257049	-0.375249	0.319664	-0.244593	0.525898	-0.563918	0.113771	0.0764782	0.844957	-0.116277	0.765775	-0.0287418	0.941488	-0.210806	0.586137	-0.169675	0.662527	-0.287508	0.453154	0.123621	0.751346
Unigene41069_DB	blue	-0.615371	0.0777295	0.966727	2.14157e-05	-0.758754	0.017768	-0.81374	0.00761335	0.674567	0.046252	0.618265	0.0759484	-0.601332	0.0867361	-0.605884	0.0837491	-0.320777	0.39999	0.327992	0.388859	-0.320472	0.400464	0.646333	0.0599859	-0.179226	0.644516	-0.51328	0.157584	-0.48673	0.183931	-0.218822	0.571626	-0.567869	0.110705	0.0222377	0.954716	-0.230711	0.55035	-0.0892633	0.819357	-0.153796	0.692799	-0.095666	0.806591	-0.348055	0.358683	0.0135448	0.972411
CL1017.Contig1_DB	blue	0.640672	0.0630161	-0.960655	3.82764e-05	0.693077	0.0384519	0.90267	0.000860138	-0.587071	0.0965161	-0.545728	0.128543	0.66376	0.0512414	0.659065	0.0535114	0.401516	0.284111	-0.431513	0.246163	0.455546	0.21785	-0.602374	0.0860469	0.138087	0.723123	0.610623	0.0807071	0.540062	0.133365	0.221595	0.566637	0.586952	0.0966009	0.0490428	0.900291	0.187005	0.629964	0.197353	0.610777	0.0123051	0.974935	0.125842	0.746997	0.319183	0.40247	-0.0108015	0.977997
Unigene31965_DB	blue	0.582332	0.0999086	-0.932923	0.000240925	0.770589	0.0150881	0.85992	0.0029456	-0.45323	0.220496	-0.575799	0.104702	0.514438	0.156487	0.423743	0.255716	0.397826	0.288977	-0.531121	0.141187	0.306253	0.422835	-0.591016	0.093747	0.105106	0.787841	0.336802	0.375467	0.231714	0.548569	0.136939	0.725352	0.606591	0.0832911	-0.134084	0.730905	-0.076054	0.845809	0.0862015	0.825475	-0.0816902	0.834505	0.363029	0.336925	0.280533	0.464668	-0.205734	0.595386
CL2318.Contig8_DB	blue	-0.649037	0.0585716	0.976886	6.04356e-06	-0.80821	0.00838575	-0.905063	0.000790276	0.575379	0.105015	0.495603	0.174866	-0.696921	0.0369471	-0.579405	0.10204	-0.399168	0.287202	0.366611	0.331819	-0.457569	0.215552	0.571501	0.107931	-0.279535	0.466326	-0.491307	0.179222	-0.427207	0.251434	-0.200738	0.604545	-0.58223	0.0999823	-0.0543687	0.889513	-0.162407	0.676333	-0.203964	0.598625	-0.0272812	0.944458	-0.118606	0.761193	-0.40145	0.284198	0.0745794	0.848771
CL8223.Contig2_DB	blue	-0.624261	0.0723394	0.943857	0.000130657	-0.719093	0.0290098	-0.761609	0.0170947	0.706625	0.0333191	0.696163	0.0372408	-0.608565	0.0820195	-0.556439	0.119715	-0.447924	0.226625	0.185285	0.633173	-0.206098	0.594719	0.613177	0.0790965	-0.264325	0.491896	-0.559298	0.117421	-0.335161	0.377945	-0.00787149	0.983965	-0.511754	0.159035	0.0267929	0.945451	-0.355411	0.347911	-0.0147127	0.970033	-0.0984351	0.801082	-0.0708808	0.856206	-0.370323	0.326568	-0.0120621	0.97543
CL14477.Contig1_DB	blue	0.814128	0.00756109	-0.640584	0.063064	0.763947	0.0165562	0.621859	0.0737718	-0.596132	0.0902283	-0.593882	0.0917659	0.317755	0.404697	0.504757	0.165787	0.454633	0.21889	-0.622659	0.073293	0.378318	0.315402	-0.176862	0.64896	0.0342993	0.930194	0.144662	0.710388	0.35629	0.346635	0.662947	0.0516299	0.0959121	0.806101	0.303739	0.426847	-0.110334	0.777498	-0.237847	0.537727	0.221961	0.565979	-0.129507	0.739831	-0.246653	0.522305	0.0730839	0.851776
CL20457.Contig1_DB	blue	0.642037	0.0622772	-0.955605	5.81184e-05	0.723819	0.027477	0.91375	0.000569781	-0.509179	0.161501	-0.479207	0.191821	0.693073	0.0384533	0.51938	0.151859	0.332603	0.381823	-0.445174	0.229838	0.461537	0.211084	-0.545992	0.12832	0.252165	0.512742	0.399846	0.286309	0.393007	0.295394	0.124469	0.749684	0.590962	0.0937845	-0.0279448	0.943108	0.0434678	0.911587	0.178713	0.64548	-0.127181	0.744375	0.236308	0.540439	0.360153	0.341052	-0.0795074	0.83888
CL20669.Contig1_DB	blue	0.667575	0.0494427	-0.945253	0.000119797	0.768504	0.0155391	0.96455	2.66753e-05	-0.485569	0.185137	-0.408096	0.275542	0.729973	0.0255617	0.552276	0.123102	0.434237	0.242859	-0.414427	0.267427	0.593195	0.0922381	-0.491804	0.178715	0.311775	0.414081	0.536979	0.136032	0.487672	0.182956	0.215769	0.577137	0.572978	0.106814	0.159233	0.68239	0.124438	0.749746	0.308732	0.418895	0.00128729	0.997378	0.0887859	0.820311	0.38458	0.306791	-0.110187	0.777788
CL13841.Contig1_DB	blue	-0.634824	0.066246	0.966805	2.12424e-05	-0.72997	0.0255626	-0.813069	0.0077044	0.710857	0.0318129	0.60437	0.0847352	-0.668328	0.0490927	-0.609358	0.0815126	-0.316385	0.406838	0.225415	0.559791	-0.345878	0.361901	0.61949	0.0752019	-0.284221	0.458565	-0.555399	0.120555	-0.520773	0.150569	-0.145618	0.708541	-0.545505	0.128731	-0.0252615	0.948565	-0.332668	0.381724	-0.109788	0.778576	-0.162808	0.675569	-0.0181066	0.963124	-0.399551	0.286697	-0.0336171	0.93158
CL18886.Contig2_DB	blue	0.62454	0.0721739	-0.952558	7.30967e-05	0.712478	0.0312476	0.865621	0.0025618	-0.560896	0.116151	-0.577674	0.103313	0.648428	0.0588884	0.621311	0.0741015	0.500511	0.169964	-0.41449	0.267346	0.335481	0.37746	-0.598414	0.0886852	0.134838	0.729439	0.536487	0.136461	0.304888	0.42501	0.0912861	0.81532	0.572817	0.106936	-0.0425717	0.913405	0.152593	0.695108	0.116945	0.764459	-0.153224	0.693897	0.23424	0.544095	0.326194	0.39162	-0.0280086	0.942979
CL2722.Contig1_DB	blue	-0.674219	0.0464076	0.971546	1.24447e-05	-0.730383	0.0254373	-0.87373	0.00207747	0.645418	0.0604693	0.556875	0.119363	-0.700413	0.0356135	-0.648768	0.0587115	-0.358399	0.343582	0.377958	0.315899	-0.419397	0.261145	0.584003	0.0987042	-0.220603	0.56842	-0.504158	0.166373	-0.480828	0.190104	-0.192207	0.620295	-0.550728	0.124375	-0.0203421	0.958574	-0.195205	0.614744	-0.122856	0.752847	0.0201474	0.95897	-0.112564	0.773093	-0.33867	0.372656	-0.0362228	0.926288
CL21567.Contig1_DB	blue	-0.602385	0.0860395	0.976188	6.70265e-06	-0.777307	0.0136943	-0.869222	0.00233805	0.575724	0.104758	0.61568	0.0775382	-0.568473	0.110241	-0.525788	0.145978	-0.392642	0.295883	0.409838	0.273297	-0.337736	0.374059	0.64477	0.0608132	-0.154779	0.690914	-0.514232	0.156682	-0.414046	0.267912	-0.177068	0.648572	-0.616049	0.0773101	0.0420598	0.914443	-0.131893	0.735174	-0.134496	0.730104	-0.106739	0.784607	-0.195531	0.614141	-0.343616	0.365259	0.133494	0.732055
CL21476.Contig3_DB	blue	0.621652	0.073896	-0.85808	0.0030775	0.910749	0.000640296	0.870951	0.0022356	-0.41319	0.269002	-0.384713	0.306609	0.571232	0.108135	0.313333	0.411627	0.473422	0.198014	-0.316697	0.406349	0.523101	0.148427	-0.394174	0.293833	0.428901	0.249353	0.394691	0.293144	0.326957	0.390448	0.262384	0.4952	0.493321	0.177172	0.238725	0.536182	0.0784184	0.841064	0.281786	0.462591	0.276828	0.470834	-0.00418429	0.991476	0.383886	0.307739	-0.301525	0.430394
CL6099.Contig1_DB	blue	0.681913	0.0430452	-0.936342	0.000201299	0.654296	0.0558819	0.883148	0.00159907	-0.575658	0.104808	-0.505435	0.165126	0.727098	0.0264451	0.5641	0.113629	0.299782	0.433195	-0.404679	0.279975	0.45865	0.21433	-0.513181	0.157677	0.274055	0.475473	0.408317	0.275256	0.447012	0.227687	0.0986976	0.80056	0.532322	0.140121	-0.00651953	0.986719	0.108137	0.78184	0.121014	0.756461	-0.153534	0.693301	0.173154	0.655949	0.321952	0.398168	0.0318094	0.935253
CL26082.Contig1_DB	blue	-0.631758	0.0679804	0.939156	0.000172312	-0.73211	0.0249178	-0.77884	0.0133888	0.652311	0.0568874	0.688714	0.0402073	-0.594673	0.0912236	-0.539453	0.133889	-0.49927	0.171196	0.267926	0.485791	-0.199902	0.606082	0.594587	0.091282	-0.22205	0.56582	-0.503854	0.166671	-0.23853	0.536525	0.000657135	0.998661	-0.513474	0.157399	0.0597813	0.878577	-0.257353	0.503806	0.00399357	0.991864	0.0166779	0.966032	-0.158788	0.68324	-0.333024	0.381183	0.0195905	0.960103
CL24543.Contig1_DB	blue	0.599668	0.0878444	-0.944327	0.000126927	0.730034	0.0255433	0.924948	0.000354141	-0.452356	0.2215	-0.531813	0.140572	0.564637	0.11321	0.400681	0.285209	0.325764	0.392282	-0.487492	0.183143	0.455437	0.217974	-0.572675	0.107043	0.199012	0.607719	0.455306	0.218123	0.464045	0.208288	0.164357	0.67262	0.632755	0.0674133	-0.0121162	0.97532	0.00248644	0.994935	0.217561	0.5739	0.0884394	0.821003	0.23693	0.539342	0.326633	0.390944	-0.22641	0.558014
Unigene37345_DB	blue	0.78418	0.0123605	-0.820369	0.00675289	0.722952	0.0277539	0.782415	0.0126944	-0.587798	0.0960022	-0.452475	0.221362	0.739392	0.0228043	0.635141	0.0660684	0.528464	0.143562	-0.398937	0.287507	0.424027	0.255364	-0.30132	0.430724	0.306325	0.422719	0.263712	0.492938	0.165977	0.669541	0.168166	0.665385	0.297467	0.43693	0.133348	0.732338	0.0854334	0.827012	-0.0348482	0.92908	-0.347972	0.358805	0.0718092	0.854339	0.176439	0.649756	0.163479	0.674291
CL27058.Contig1_DB	blue	0.704424	0.0341207	-0.840773	0.00452251	0.615819	0.0774523	0.74935	0.0201102	-0.684714	0.0418612	-0.63008	0.0689413	0.519898	0.151379	0.616436	0.0770711	0.226078	0.558606	-0.476955	0.194218	0.389087	0.300668	-0.485252	0.185466	0.0744142	0.849103	0.412464	0.269929	0.631964	0.067863	0.382961	0.309005	0.396635	0.290556	0.0748622	0.848202	0.115003	0.768284	-0.0434848	0.911553	0.158936	0.682957	0.00396852	0.991916	0.0730738	0.851796	0.121153	0.756188
CL14593.Contig1_DB	blue	0.613733	0.078749	-0.93594	0.000205693	0.680364	0.0437092	0.853939	0.00338896	-0.596503	0.0899766	-0.634161	0.066619	0.589983	0.0944672	0.609902	0.0811656	0.518799	0.152399	-0.348934	0.357387	0.347831	0.359013	-0.610498	0.0807864	0.128617	0.741568	0.701649	0.0351491	0.460401	0.212358	0.127731	0.743301	0.56405	0.113668	0.0581729	0.881825	0.279768	0.465939	0.158345	0.684086	0.0940585	0.809793	0.0960173	0.805892	0.311248	0.414913	-0.0491613	0.900051
Unigene37066_DB	blue	0.605761	0.0838286	-0.893789	0.0011572	0.779322	0.0132938	0.836791	0.00491062	-0.532004	0.140403	-0.4903	0.180253	0.519564	0.151689	0.458828	0.214129	0.203696	0.599115	-0.460276	0.212499	0.468817	0.203024	-0.53725	0.135797	0.186345	0.631195	0.371841	0.324432	0.57496	0.105328	0.394221	0.293771	0.545575	0.128671	0.0641381	0.869786	0.0224081	0.95437	0.16804	0.665626	0.278164	0.468606	0.0802261	0.837439	0.270167	0.482008	-0.145343	0.709073
CL28573.Contig1_DB	blue	-0.665826	0.0502624	0.949519	9.05708e-05	-0.782237	0.0127282	-0.929041	0.000292218	0.508149	0.162493	0.518322	0.152843	-0.618734	0.0756621	-0.471357	0.200252	-0.372091	0.324082	0.474526	0.196823	-0.495045	0.175428	0.527286	0.144623	-0.245109	0.524997	-0.444206	0.230975	-0.463901	0.208448	-0.230868	0.550072	-0.575656	0.104809	-0.0660376	0.865957	-0.0384852	0.921695	-0.194006	0.616961	-0.0790398	0.839817	-0.154815	0.690845	-0.309719	0.417331	0.157948	0.684846
CL13757.Contig1_DB	blue	-0.650448	0.0578422	0.962121	3.35618e-05	-0.686055	0.041302	-0.816575	0.00723673	0.711485	0.0315931	0.624424	0.072243	-0.677055	0.0451492	-0.573816	0.106184	-0.294653	0.441488	0.218815	0.571639	-0.346612	0.360815	0.601144	0.0868612	-0.312528	0.412894	-0.544289	0.129758	-0.529954	0.142228	-0.0834826	0.830915	-0.536394	0.136542	-0.0139709	0.971543	-0.330381	0.385207	-0.0900581	0.817771	-0.136872	0.725483	-0.0269977	0.945034	-0.387674	0.302581	-0.0430475	0.91244
Unigene3010_DB	blue	0.587268	0.0963767	-0.944031	0.000129264	0.660339	0.0528893	0.785394	0.0121344	-0.667595	0.0494336	-0.676206	0.0455236	0.547645	0.126935	0.681691	0.0431398	0.36257	0.337582	-0.407272	0.276608	0.250265	0.516031	-0.685932	0.0413533	0.00237877	0.995154	0.579113	0.102254	0.474958	0.196359	0.205409	0.595979	0.57037	0.10879	-0.0900863	0.817714	0.214696	0.579078	0.0380751	0.922528	0.0459362	0.906584	0.175463	0.651593	0.260371	0.498635	0.0428384	0.912864
Unigene4731_DB	blue	-0.652512	0.0567853	0.939026	0.000173587	-0.710671	0.0318781	-0.811032	0.0079853	0.63205	0.0678139	0.680381	0.0437018	-0.609609	0.0813521	-0.535523	0.137303	-0.512143	0.158664	0.300168	0.432574	-0.248837	0.518507	0.573273	0.106593	-0.225747	0.559198	-0.528525	0.143507	-0.274354	0.474972	0.00181825	0.996296	-0.514513	0.156416	0.0291487	0.940661	-0.241763	0.530847	-0.0217936	0.95562	0.0326446	0.933556	-0.156267	0.688063	-0.315356	0.408449	0.0252781	0.948531
CL14758.Contig1_DB	blue	-0.611091	0.0804106	0.981634	2.71536e-06	-0.789699	0.0113548	-0.855211	0.00329106	0.614198	0.0784584	0.558301	0.118218	-0.672792	0.047049	-0.543802	0.13017	-0.391431	0.297509	0.266716	0.487838	-0.348888	0.357455	0.616324	0.0771401	-0.302489	0.428848	-0.506084	0.164494	-0.37366	0.321884	-0.0901377	0.817612	-0.591665	0.0932955	0.0122739	0.974999	-0.239927	0.534068	-0.156989	0.686681	-0.0586015	0.880959	-0.127654	0.743451	-0.446627	0.228137	0.0740083	0.849918
CL6476.Contig2_DB	blue	-0.673154	0.046886	0.971355	1.27365e-05	-0.769029	0.0154247	-0.894683	0.0011245	0.619317	0.0753072	0.496421	0.174044	-0.727175	0.0264213	-0.637676	0.0646582	-0.363668	0.336011	0.361633	0.338925	-0.475802	0.195453	0.561283	0.115845	-0.273143	0.477001	-0.501667	0.168821	-0.489915	0.180647	-0.222961	0.564186	-0.555042	0.120845	-0.0705227	0.856926	-0.195063	0.615007	-0.182836	0.637749	-0.00811385	0.983472	-0.0790858	0.839725	-0.377325	0.316778	-0.00632846	0.987108
CL4070.Contig1_DB	blue	0.632495	0.0675611	-0.944624	0.000124607	0.779408	0.0132768	0.890771	0.00127256	-0.517856	0.153278	-0.383134	0.308768	0.745316	0.0211745	0.512473	0.15835	0.267154	0.487097	-0.361113	0.339672	0.49853	0.171933	-0.511986	0.158814	0.363142	0.336763	0.320559	0.400329	0.384458	0.306957	0.160584	0.67981	0.568611	0.110135	0.00814221	0.983414	0.0672209	0.863573	0.212481	0.583093	-0.0964808	0.804969	0.168943	0.663914	0.434787	0.242195	-0.0647245	0.868604
Unigene2839_DB	blue	0.576007	0.104548	-0.92408	0.000368372	0.792429	0.0108784	0.859724	0.00295947	-0.43336	0.243921	-0.56088	0.116164	0.534289	0.138385	0.424687	0.254546	0.518909	0.152296	-0.469223	0.202579	0.29409	0.442402	-0.569682	0.109315	0.146489	0.706859	0.398531	0.288044	0.145443	0.70888	0.0766178	0.844677	0.593488	0.0920367	-0.0885889	0.820704	-0.0127338	0.974062	0.117392	0.763579	-0.106514	0.785052	0.337054	0.375087	0.319733	0.401614	-0.224323	0.561745
CL3467.Contig1_DB	blue	0.538631	0.134598	-0.901167	0.000906169	0.737961	0.0232098	0.686547	0.0410981	-0.601304	0.0867548	-0.677469	0.0449676	0.497111	0.173352	0.413207	0.268981	0.366975	0.331302	-0.262477	0.495041	0.0639076	0.870251	-0.619804	0.0750118	0.194344	0.616336	0.295111	0.440745	0.0900837	0.817719	-0.0466298	0.905179	0.526363	0.145457	-0.229258	0.552934	0.132419	0.734149	-0.0871584	0.823563	-0.0485254	0.901339	0.290232	0.44869	0.344026	0.36465	-0.0836109	0.830659
CL23392.Contig1_DB	blue	0.61671	0.076902	-0.950805	8.2853e-05	0.767465	0.0157673	0.901129	0.000907353	-0.567192	0.111227	-0.45547	0.217936	0.67704	0.0451558	0.657674	0.0541958	0.391654	0.29721	-0.383125	0.30878	0.511865	0.158928	-0.584621	0.0982615	0.196701	0.61198	0.605999	0.0836744	0.561744	0.115481	0.310746	0.415706	0.586591	0.0968569	0.123305	0.751967	0.209257	0.588956	0.277484	0.46974	0.114507	0.769262	0.048474	0.901443	0.379891	0.313227	-0.048442	0.901508
Unigene44045_DB	blue	-0.625624	0.0715344	0.930045	0.000278288	-0.807695	0.00846029	-0.891099	0.00125964	0.461093	0.211582	0.571399	0.108008	-0.506422	0.164166	-0.373091	0.32268	-0.386965	0.303543	0.520285	0.15102	-0.39433	0.293626	0.543559	0.130376	-0.180843	0.641483	-0.364832	0.33435	-0.344801	0.363498	-0.211755	0.584413	-0.583622	0.0989781	0.0159894	0.967434	0.0567604	0.884679	-0.128987	0.740846	-0.0976412	0.80266	-0.248089	0.519807	-0.267215	0.486994	0.250507	0.515611
CL17468.Contig2_DB	blue	0.674849	0.0461261	-0.915508	0.000531097	0.600656	0.0871858	0.88297	0.00160732	-0.592158	0.0929542	-0.589638	0.0947084	0.645426	0.0604651	0.561744	0.115481	0.373746	0.321763	-0.384207	0.3073	0.463349	0.209062	-0.52726	0.144646	0.21218	0.58364	0.614717	0.0781357	0.590231	0.0942938	0.127621	0.743515	0.526093	0.145701	0.0942796	0.809352	0.219218	0.570913	0.157345	0.686	0.0647892	0.868473	0.0628185	0.872447	0.267831	0.485952	0.000866784	0.998234
Unigene36240_DB	blue	-0.601436	0.0866678	0.983878	1.72472e-06	-0.747009	0.0207236	-0.867058	0.00247084	0.589971	0.0944754	0.611762	0.0799866	-0.608548	0.0820308	-0.503942	0.166584	-0.349226	0.356959	0.354387	0.349402	-0.332656	0.381742	0.644776	0.0608102	-0.218302	0.572563	-0.500009	0.170462	-0.415628	0.265901	-0.0961237	0.80568	-0.621561	0.0739506	0.0670231	0.863972	-0.16418	0.672958	-0.133039	0.732941	-0.0747996	0.848328	-0.197504	0.610499	-0.386392	0.304322	0.112513	0.773194
Unigene37033_DB	blue	0.54891	0.125881	-0.886866	0.00143335	0.74885	0.0202403	0.701455	0.0352216	-0.599765	0.0877795	-0.61693	0.0767668	0.443435	0.231883	0.45235	0.221506	0.166646	0.668269	-0.421153	0.258944	0.189076	0.626109	-0.617815	0.0762236	0.0898848	0.818117	0.216084	0.576567	0.331069	0.384157	0.246145	0.523189	0.529569	0.142572	-0.188307	0.627541	-0.00310844	0.993668	-0.0589733	0.880208	0.106268	0.78554	0.247103	0.521522	0.245765	0.523853	-0.0742071	0.849519
CL29035.Contig1_DB	blue	-0.644169	0.0611332	0.973163	1.01559e-05	-0.729707	0.0256428	-0.860508	0.00290434	0.6593	0.0533964	0.548798	0.125974	-0.700595	0.0355449	-0.575565	0.104876	-0.284817	0.45758	0.268523	0.484782	-0.422423	0.257359	0.594649	0.0912395	-0.319102	0.402596	-0.522608	0.148879	-0.544428	0.129639	-0.148477	0.703027	-0.567771	0.11078	-0.0376348	0.923421	-0.268767	0.484369	-0.164258	0.672808	-0.124077	0.750453	-0.0460101	0.906434	-0.414299	0.267589	0.0022151	0.995487
Unigene39220_DB	blue	-0.703001	0.0346456	0.919201	0.000455869	-0.874898	0.00201337	-0.927292	0.000317657	0.504	0.166528	0.39132	0.297658	-0.702339	0.0348917	-0.567948	0.110644	-0.499766	0.170703	0.423929	0.255485	-0.580529	0.101218	0.434298	0.242785	-0.322382	0.397502	-0.452565	0.22126	-0.397406	0.289533	-0.332786	0.381545	-0.49798	0.172483	-0.221939	0.566019	-0.0942978	0.809316	-0.253407	0.510596	-0.0382615	0.922149	-0.0297999	0.939337	-0.338343	0.373147	0.105721	0.786623
CL22223.Contig2_DB	blue	0.636564	0.0652747	-0.915176	0.000538254	0.769877	0.015241	0.936958	0.00019468	-0.465825	0.206315	-0.409419	0.273835	0.63046	0.0687231	0.463644	0.208733	0.301994	0.429642	-0.450505	0.223632	0.604384	0.0847263	-0.491416	0.179111	0.282898	0.46075	0.4756	0.195669	0.59388	0.0917671	0.322153	0.397857	0.574824	0.105429	0.161152	0.678725	0.0553116	0.887607	0.306825	0.421923	0.192269	0.62018	0.0616534	0.874798	0.339526	0.37137	-0.176713	0.64924
CL5280.Contig2_DB	blue	0.581963	0.100176	-0.978322	4.83518e-06	0.706524	0.0333558	0.921028	0.000421568	-0.530839	0.141438	-0.505711	0.164857	0.677828	0.0448101	0.50044	0.170034	0.325782	0.392254	-0.322466	0.397372	0.459108	0.213813	-0.619665	0.0750958	0.286444	0.454902	0.582082	0.10009	0.521356	0.150031	0.0839563	0.829967	0.65453	0.0557637	0.0117897	0.975985	0.201956	0.602307	0.279641	0.466149	0.088047	0.821787	0.148804	0.702397	0.45744	0.215699	-0.133612	0.731824
CL29477.Contig1_DB	blue	0.651168	0.057472	-0.861568	0.00283084	0.571126	0.108215	0.759261	0.0176473	-0.674302	0.0463703	-0.738189	0.0231447	0.501222	0.16926	0.527163	0.144734	0.410912	0.271916	-0.295775	0.439668	0.291529	0.446573	-0.540365	0.133104	0.148547	0.702891	0.660633	0.0527462	0.5656	0.11246	0.113324	0.771594	0.45044	0.223707	0.088673	0.820536	0.324439	0.394322	0.0182991	0.962732	0.253397	0.510613	-0.0206515	0.957944	0.184232	0.635141	0.022093	0.955011
CL3292.Contig2_DB	blue	0.577557	0.103399	-0.979103	4.25608e-06	0.731205	0.0251893	0.901355	0.000900332	-0.526356	0.145464	-0.522819	0.148686	0.642294	0.0621386	0.60512	0.0842463	0.385968	0.304899	-0.449166	0.225182	0.395482	0.29209	-0.653053	0.0565105	0.118485	0.76143	0.532709	0.139779	0.414845	0.266895	0.167011	0.667578	0.651281	0.0574138	-0.0649569	0.868135	0.106299	0.785479	0.206939	0.593184	-0.0668842	0.864252	0.257878	0.502904	0.378513	0.315131	-0.0902489	0.81739
CL2692.Contig7_DB	blue	-0.648365	0.0589211	0.952403	7.39249e-05	-0.748531	0.0203235	-0.838417	0.00474955	0.671751	0.0475207	0.56201	0.115271	-0.64333	0.0615819	-0.632969	0.0672918	-0.305276	0.424392	0.335098	0.378039	-0.418549	0.262211	0.595053	0.0909638	-0.217159	0.574626	-0.533941	0.138691	-0.576949	0.103849	-0.281771	0.462615	-0.540265	0.133189	-0.0683912	0.861217	-0.24256	0.529452	-0.138189	0.722925	-0.179226	0.644516	-0.0188845	0.96154	-0.33607	0.37657	-0.0164805	0.966434
CL15109.Contig2_DB	blue	-0.614399	0.0783332	0.987136	7.85076e-07	-0.759685	0.0175467	-0.865537	0.00256723	0.61972	0.0750623	0.576048	0.104517	-0.655023	0.0555163	-0.600398	0.0873575	-0.369994	0.327032	0.348729	0.35769	-0.358532	0.34339	0.643069	0.0617215	-0.20492	0.596875	-0.524597	0.147061	-0.431408	0.24629	-0.15197	0.696306	-0.605238	0.0841693	0.0342413	0.930312	-0.201544	0.603063	-0.14571	0.708364	-0.0336096	0.931596	-0.160102	0.68073	-0.392748	0.295742	0.0443299	0.90984
CL704.Contig1_DB	blue	0.613663	0.0787924	-0.936277	0.000202006	0.717912	0.0294014	0.854748	0.00332653	-0.619534	0.0751752	-0.447332	0.227314	0.700708	0.0355023	0.55137	0.123846	0.183668	0.636193	-0.25556	0.506886	0.509769	0.160934	-0.559311	0.117411	0.352202	0.352591	0.502171	0.168324	0.652065	0.057013	0.236132	0.54075	0.562653	0.114764	0.0991375	0.799686	0.254212	0.509207	0.245125	0.524968	0.218887	0.571509	-0.021443	0.956333	0.433113	0.244219	-0.0185413	0.962239
Unigene43364_DB	blue	-0.628805	0.0696769	0.968242	1.82198e-05	-0.769621	0.0152963	-0.872351	0.00215495	0.596363	0.0900712	0.570782	0.108477	-0.607333	0.0828117	-0.608746	0.0819035	-0.364974	0.334147	0.445529	0.229422	-0.393439	0.294816	0.622248	0.0735389	-0.131784	0.735386	-0.501872	0.168619	-0.47123	0.20039	-0.264675	0.491301	-0.589075	0.0951031	0.00577957	0.988226	-0.123218	0.752138	-0.138768	0.721801	-0.065843	0.866349	-0.161045	0.67893	-0.313957	0.410645	0.0589414	0.880273
CL3230.Contig3_DB	blue	0.613478	0.0789082	-0.892946	0.00118867	0.78555	0.0121055	0.891745	0.00123448	-0.42043	0.259849	-0.45423	0.219351	0.627407	0.0704893	0.287997	0.452351	0.454686	0.21883	-0.281003	0.463888	0.460524	0.212221	-0.442126	0.233428	0.448346	0.226134	0.431885	0.24571	0.28957	0.449774	0.0146739	0.970112	0.544974	0.129178	0.110901	0.776378	0.114549	0.769179	0.250918	0.514899	0.0950578	0.807802	0.114236	0.769796	0.427201	0.251441	-0.264712	0.491239
CL14855.Contig1_DB	blue	0.613654	0.0787981	-0.963407	2.97759e-05	0.747936	0.0204791	0.900673	0.000921654	-0.586213	0.0971253	-0.437343	0.239122	0.734302	0.0242686	0.676559	0.0453678	0.372827	0.32305	-0.326706	0.390833	0.508959	0.161713	-0.592273	0.0928743	0.247126	0.521482	0.60874	0.0819076	0.550944	0.124197	0.244075	0.526802	0.594189	0.0915546	0.103315	0.791391	0.255634	0.506759	0.286256	0.45521	0.0540892	0.890079	0.0492752	0.89982	0.432867	0.244518	-0.00924873	0.98116
Unigene44904_DB	blue	-0.6462	0.060056	0.983109	2.02862e-06	-0.724091	0.0273902	-0.87507	0.00200402	0.63632	0.0654103	0.561966	0.115305	-0.700253	0.0356739	-0.614886	0.0780305	-0.342685	0.366646	0.340671	0.369654	-0.398163	0.28853	0.611184	0.080352	-0.243747	0.527374	-0.517557	0.153556	-0.471451	0.200149	-0.134547	0.730005	-0.582374	0.0998785	0.0111453	0.977297	-0.214998	0.578532	-0.142355	0.714849	0.00588368	0.988014	-0.133299	0.732434	-0.384716	0.306605	-0.00560809	0.988576
CL26516.Contig1_DB	blue	0.505145	0.165409	-0.884786	0.00152449	0.71117	0.0317031	0.630938	0.068449	-0.674524	0.0462711	-0.750541	0.0198029	0.370754	0.325961	0.505215	0.165341	0.269615	0.482939	-0.331424	0.383616	0.0299067	0.93912	-0.698434	0.0363652	-0.00251997	0.994866	0.370317	0.326577	0.295633	0.439898	0.173578	0.655148	0.526629	0.145216	-0.225104	0.560347	0.151846	0.696543	-0.125873	0.746936	0.182269	0.638811	0.221321	0.56713	0.236839	0.539503	-0.0395103	0.919615
CL6404.Contig4_DB	blue	0.599915	0.0876794	-0.9808	3.16926e-06	0.67958	0.0440478	0.910853	0.000637754	-0.56199	0.115287	-0.488809	0.181784	0.715192	0.0303164	0.58601	0.0972696	0.275942	0.472314	-0.368981	0.328461	0.463054	0.20939	-0.623817	0.0726031	0.237624	0.53812	0.531218	0.141101	0.532477	0.139983	0.123225	0.752123	0.639793	0.0634954	-0.0275869	0.943836	0.170959	0.660096	0.237985	0.537484	-0.0283528	0.942279	0.179165	0.64463	0.425639	0.253367	-0.0397527	0.919123
CL8012.Contig2_DB	blue	-0.663024	0.0515933	0.939493	0.000169059	-0.732055	0.0249344	-0.853993	0.00338482	0.648988	0.0585969	0.570908	0.108381	-0.675603	0.0457909	-0.548912	0.125879	-0.416384	0.264943	0.217914	0.573264	-0.428059	0.250386	0.539293	0.134026	-0.352822	0.351685	-0.618867	0.0755808	-0.524548	0.147105	-0.126119	0.746453	-0.517776	0.153353	-0.146272	0.707278	-0.344327	0.364202	-0.180144	0.642794	-0.204702	0.597273	0.045281	0.907912	-0.390972	0.298126	0.0287721	0.941426
CL27343.Contig1_DB	blue	0.687219	0.0408204	-0.898324	0.000997846	0.698531	0.0363281	0.858573	0.00304178	-0.591073	0.0937068	-0.448307	0.226179	0.803263	0.00912036	0.56941	0.109523	0.514977	0.155979	-0.15526	0.689991	0.479015	0.192024	-0.42716	0.25149	0.470399	0.201295	0.580516	0.101228	0.369576	0.327621	-0.00340399	0.993066	0.45606	0.217265	0.19452	0.616011	0.36282	0.337224	0.213724	0.58084	-0.0600431	0.878048	-0.0428163	0.912909	0.438515	0.23772	0.037822	0.923041
CL6837.Contig1_DB	blue	-0.63594	0.0656218	0.973097	1.02432e-05	-0.81408	0.0075675	-0.91525	0.00053664	0.540196	0.133249	0.460771	0.211943	-0.696909	0.0369518	-0.518681	0.152509	-0.349715	0.356238	0.36445	0.334895	-0.483904	0.186873	0.558394	0.118143	-0.322175	0.397823	-0.445414	0.229557	-0.432408	0.245074	-0.190188	0.624043	-0.596939	0.0896809	-0.0484829	0.901425	-0.123865	0.750869	-0.232559	0.547071	-0.0451181	0.908242	-0.131921	0.73512	-0.42623	0.252638	0.119077	0.760266
CL15594.Contig1_DB	blue	0.578433	0.102753	-0.872057	0.00217171	0.690632	0.0394294	0.78459	0.0122837	-0.581445	0.100552	-0.671861	0.0474706	0.447536	0.227077	0.455956	0.217383	0.461597	0.211018	-0.297187	0.437383	0.307112	0.421467	-0.573265	0.106599	0.153389	0.693581	0.671843	0.0474786	0.50741	0.163208	0.177028	0.648647	0.519372	0.151866	0.108804	0.780521	0.28034	0.464989	0.132109	0.734753	0.375302	0.319592	0.00170559	0.996525	0.265311	0.490221	-0.147491	0.704928
CL14419.Contig1_DB	blue	-0.616572	0.0769871	0.988183	5.83816e-07	-0.748627	0.0202984	-0.866704	0.00249308	0.618271	0.0759447	0.573985	0.106058	-0.669261	0.0486608	-0.59675	0.0898087	-0.369116	0.328271	0.340836	0.369408	-0.355422	0.347896	0.639151	0.0638468	-0.218383	0.572417	-0.516864	0.154205	-0.41607	0.265342	-0.121444	0.755618	-0.604879	0.084403	0.0452199	0.908036	-0.202849	0.600669	-0.141632	0.71625	0.000566212	0.998847	-0.171781	0.658542	-0.400355	0.285638	0.0361483	0.926439
CL15476.Contig4_DB	blue	-0.64285	0.061839	0.944364	0.000126632	-0.761471	0.0171268	-0.902709	0.000858969	0.501213	0.169269	0.602951	0.0856663	-0.56394	0.113755	-0.497624	0.172838	-0.517484	0.153625	0.48897	0.181618	-0.379379	0.313934	0.563994	0.113712	-0.140416	0.718605	-0.516555	0.154495	-0.333233	0.380866	-0.15175	0.696729	-0.57744	0.103486	-0.0114641	0.976648	-0.0605408	0.877043	-0.137261	0.724727	0.00348331	0.992904	-0.227461	0.556136	-0.272387	0.478271	0.163103	0.675008
Unigene39393_DB	blue	0.675908	0.0456553	-0.89441	0.00113443	0.713794	0.030794	0.916412	0.000511938	-0.513238	0.157623	-0.405896	0.278392	0.661885	0.0521404	0.541039	0.132526	0.261955	0.495931	-0.471038	0.200599	0.626744	0.0708769	-0.45881	0.214149	0.25711	0.504222	0.460135	0.212657	0.652966	0.0565546	0.363246	0.336614	0.521392	0.149998	0.180162	0.642761	0.0664796	0.865067	0.259124	0.500769	0.132073	0.734824	0.0231819	0.952795	0.278417	0.468186	-0.0619074	0.874285
Unigene42233_DB	blue	0.652624	0.0567281	-0.854434	0.00335062	0.645613	0.0603661	0.801358	0.00941442	-0.616891	0.0767908	-0.651697	0.057201	0.495018	0.175455	0.612078	0.0797871	0.492492	0.178015	-0.403688	0.281268	0.38752	0.302789	-0.523933	0.147666	0.0632382	0.871601	0.699298	0.0360357	0.588201	0.0957177	0.301612	0.430255	0.456373	0.216909	0.179996	0.643071	0.261673	0.496412	0.1057	0.786664	0.263208	0.493795	-0.0396386	0.919354	0.152327	0.69562	-0.00885466	0.981963
CL4084.Contig5_DB	blue	0.600938	0.0869984	-0.900298	0.000933541	0.607101	0.0829612	0.667708	0.0493806	-0.81864	0.00697053	-0.641444	0.0625973	0.688813	0.0401667	0.612547	0.0794923	0.260336	0.498696	0.0264015	0.946247	0.210513	0.58667	-0.593161	0.0922618	0.384073	0.307483	0.575347	0.105039	0.495363	0.175108	-0.0306125	0.937685	0.448879	0.225515	0.00754713	0.984626	0.551923	0.123391	0.0103078	0.979003	0.177139	0.648439	-0.104239	0.789559	0.440941	0.234832	0.188056	0.628007
CL18727.Contig1_DB	blue	0.577472	0.103462	-0.954353	6.39817e-05	0.709725	0.0322114	0.861722	0.00282031	-0.560463	0.116494	-0.496821	0.173642	0.620741	0.0744447	0.56765	0.110874	0.188866	0.626499	-0.443664	0.231613	0.424583	0.254675	-0.633402	0.0670472	0.148141	0.703675	0.422013	0.25787	0.54159	0.132053	0.25533	0.507282	0.623925	0.0725388	-0.0698127	0.858355	0.0699842	0.85801	0.176374	0.649878	0.0462112	0.906027	0.202481	0.601343	0.35305	0.351352	-0.0572213	0.883747
CL14306.Contig1_DB	blue	0.614568	0.0782279	-0.967388	1.99761e-05	0.68934	0.0399521	0.916634	0.000507289	-0.576824	0.103941	-0.456203	0.217101	0.75548	0.0185618	0.599008	0.0882863	0.337654	0.374183	-0.27398	0.475598	0.516447	0.154596	-0.582825	0.0995526	0.32499	0.393474	0.627367	0.0705131	0.578204	0.102922	0.120183	0.758093	0.608847	0.0818394	0.0916554	0.814583	0.286638	0.454583	0.301337	0.430697	0.0595409	0.879062	0.0517889	0.894732	0.467068	0.204945	-0.0297839	0.93937
CL160.Contig5_DB	blue	-0.632592	0.0675058	0.897441	0.00102762	-0.865719	0.00255554	-0.891955	0.0012264	0.417543	0.263479	0.510228	0.160494	-0.527752	0.144203	-0.303603	0.427065	-0.49972	0.170748	0.419182	0.261415	-0.433351	0.243931	0.459649	0.213204	-0.317174	0.405604	-0.390155	0.299227	-0.26617	0.488765	-0.172374	0.657422	-0.538666	0.134568	-0.105188	0.787679	-0.00416483	0.991516	-0.191887	0.620887	-0.157993	0.684759	-0.151535	0.697142	-0.321653	0.398632	0.31295	0.41223
CL25779.Contig1_DB	blue	-0.624776	0.0720344	0.967339	2.00803e-05	-0.675153	0.0459909	-0.784592	0.0122834	0.732829	0.0247038	0.641053	0.0628094	-0.667644	0.0494106	-0.604606	0.0845814	-0.262495	0.495011	0.218115	0.572901	-0.283755	0.459333	0.641423	0.0626088	-0.265542	0.489829	-0.511929	0.158868	-0.492643	0.177861	-0.0705584	0.856855	-0.547445	0.127102	0.061544	0.875019	-0.324422	0.394349	-0.0469837	0.904461	-0.0834801	0.83092	-0.0763858	0.845143	-0.391266	0.297731	-0.0765961	0.844721
Unigene28594_DB	blue	-0.730081	0.025529	0.856989	0.00315751	-0.737529	0.0233333	-0.849157	0.00377493	0.558682	0.117913	0.583975	0.0987247	-0.608433	0.0821042	-0.446969	0.227739	-0.604722	0.0845058	0.294855	0.44116	-0.44121	0.234512	0.38077	0.312014	-0.360815	0.3401	-0.570043	0.109039	-0.366864	0.331459	-0.108157	0.7818	-0.40256	0.282743	-0.252024	0.512986	-0.245832	0.523735	-0.121342	0.755817	-0.142849	0.713895	0.0546125	0.88902	-0.248898	0.518402	0.0887668	0.820349
CL3469.Contig2_DB	blue	0.559635	0.117152	-0.957114	5.15683e-05	0.844742	0.00415707	0.929389	0.00028734	-0.441567	0.234089	-0.362021	0.338368	0.68196	0.0430254	0.467594	0.204366	0.359591	0.341861	-0.346281	0.361305	0.521986	0.149451	-0.564537	0.113288	0.336398	0.376075	0.466605	0.205455	0.409743	0.273419	0.202194	0.60187	0.647093	0.0595863	0.067305	0.863404	0.102029	0.793942	0.353786	0.350277	0.0860872	0.825704	0.148327	0.703316	0.502834	0.167672	-0.223431	0.563342
CL584.Contig2_DB	blue	0.6707	0.0479997	-0.907426	0.000725277	0.692089	0.0388449	0.933812	0.000230131	-0.477007	0.194163	-0.486004	0.184685	0.685564	0.0415063	0.533038	0.139488	0.554422	0.121348	-0.395996	0.291406	0.519222	0.152006	-0.466017	0.206103	0.270246	0.481875	0.615658	0.0775519	0.41369	0.268365	0.102672	0.792667	0.531016	0.14128	0.162846	0.675497	0.171982	0.658161	0.253629	0.510214	-0.047506	0.903403	0.0969147	0.804106	0.323545	0.395703	-0.0971506	0.803636
CL8035.Contig4_DB	blue	-0.717941	0.0293919	0.761665	0.0170818	-0.723165	0.0276857	-0.627495	0.0704382	0.745966	0.0210007	0.72799	0.0261691	-0.420441	0.259836	-0.496913	0.17355	-0.495989	0.174478	0.201425	0.603281	-0.246058	0.523342	0.381529	0.310971	-0.244163	0.526647	-0.516678	0.154379	-0.447159	0.227517	-0.297274	0.437242	-0.24279	0.529049	-0.266016	0.489025	-0.360285	0.340863	0.11614	0.766045	-0.457237	0.215928	0.25123	0.514359	-0.0854591	0.82696	-0.0561593	0.885893
CL3790.Contig1_DB	blue	0.555449	0.120515	-0.914491	0.000553243	0.606049	0.0836419	0.645355	0.0605029	-0.795877	0.010296	-0.740121	0.0225994	0.579734	0.101798	0.65665	0.0547035	0.3323	0.382282	-0.113593	0.771064	0.0704845	0.857003	-0.688052	0.0404779	0.155668	0.689209	0.569721	0.109285	0.370669	0.32608	-0.0171124	0.965147	0.495904	0.174564	-0.142568	0.714438	0.447363	0.227279	-0.0789536	0.83999	0.0665932	0.864838	0.0762075	0.845501	0.357376	0.345062	0.160859	0.679284
CL1209.Contig9_DB	blue	-0.605119	0.0842464	0.974515	8.48661e-06	-0.798268	0.00990487	-0.860375	0.00291364	0.608018	0.0823706	0.544587	0.129505	-0.631473	0.0681427	-0.60975	0.0812626	-0.371883	0.324374	0.362676	0.337431	-0.383854	0.307783	0.634646	0.0663463	-0.188459	0.627258	-0.524269	0.14736	-0.454943	0.218536	-0.241314	0.531633	-0.597921	0.0890175	-0.00810549	0.983489	-0.189565	0.625199	-0.172137	0.65787	-0.104305	0.78943	-0.12295	0.752663	-0.384402	0.307034	0.06545	0.867141
CL4685.Contig3_DB	blue	0.586201	0.0971339	-0.930022	0.000278601	0.734798	0.0241234	0.923906	0.000371267	-0.46215	0.2104	-0.531767	0.140613	0.546639	0.127777	0.519657	0.151602	0.466447	0.205629	-0.483486	0.18731	0.471253	0.200365	-0.588869	0.0952481	0.10595	0.786169	0.639322	0.063753	0.511483	0.159293	0.253877	0.509785	0.62197	0.0737055	0.0892708	0.819342	0.10475	0.788546	0.276375	0.471591	0.156634	0.687359	0.151366	0.697466	0.30491	0.424976	-0.201345	0.603429
CL16156.Contig1_DB	blue	0.520932	0.150422	-0.986897	8.37059e-07	0.775036	0.0141553	0.90993	0.000660552	-0.46516	0.207051	-0.48388	0.186898	0.621091	0.074234	0.487862	0.18276	0.346264	0.36133	-0.400958	0.284844	0.390465	0.298809	-0.671031	0.0478485	0.191139	0.622276	0.49383	0.176657	0.375234	0.319686	0.11672	0.764903	0.704956	0.0339261	-0.094285	0.809341	0.080432	0.837026	0.269735	0.482736	0.00586404	0.988054	0.290236	0.448684	0.466994	0.205026	-0.210102	0.587418
CL21747.Contig1_DB	blue	-0.613218	0.0790709	0.921242	0.000417681	-0.820492	0.00673754	-0.821487	0.00661454	0.55028	0.124745	0.556573	0.119607	-0.612678	0.0794096	-0.384521	0.306872	-0.478738	0.192318	0.205675	0.595493	-0.320449	0.4005	0.51737	0.153732	-0.403601	0.281381	-0.452275	0.221592	-0.240306	0.533404	-0.0148014	0.969852	-0.525914	0.145864	-0.0499206	0.898513	-0.223978	0.562364	-0.137344	0.724567	-0.122069	0.75439	-0.0888221	0.820238	-0.432261	0.245254	0.173102	0.656047
CL6173.Contig1_DB	blue	0.721366	0.0282657	-0.841225	0.00447985	0.865603	0.00256297	0.94195	0.000146581	-0.398872	0.287593	-0.255304	0.507327	0.71995	0.0287277	0.532668	0.139815	0.551049	0.12411	-0.457813	0.215276	0.709512	0.0322867	-0.294852	0.441165	0.372243	0.323868	0.423946	0.255464	0.388055	0.302065	0.395141	0.292543	0.428153	0.25027	0.361766	0.338734	0.0325777	0.933692	0.332881	0.381399	0.00252627	0.994854	-0.0346096	0.929564	0.297709	0.436539	-0.129187	0.740456
Unigene1197_DB	blue	0.558236	0.11827	-0.820397	0.00674936	0.784997	0.012208	0.566949	0.111415	-0.702177	0.0349519	-0.613853	0.0786739	0.536206	0.136705	0.450934	0.223137	0.411103	0.271672	-0.00891576	0.981838	0.0536702	0.890926	-0.506232	0.16435	0.37237	0.323691	0.312174	0.413453	0.078648	0.840603	-0.00333392	0.993208	0.367716	0.330251	-0.0422709	0.914014	0.35896	0.342772	-0.108924	0.780284	0.122345	0.753848	0.00122451	0.997505	0.387301	0.303087	0.0295634	0.939818
Unigene40610_DB	blue	0.716325	0.0299332	-0.862796	0.00274741	0.718598	0.0291734	0.769761	0.0152662	-0.66117	0.0524861	-0.371569	0.324816	0.872671	0.0021368	0.618758	0.0756477	0.387082	0.303384	-0.0979528	0.802041	0.449562	0.224723	-0.360749	0.340195	0.550345	0.124692	0.351709	0.353312	0.286042	0.455564	0.0324534	0.933945	0.358635	0.343241	0.154393	0.691653	0.336776	0.375506	0.0992636	0.799435	-0.194576	0.615907	-0.0711464	0.855672	0.437358	0.239104	0.188349	0.627461
CL21935.Contig1_DB	blue	0.626043	0.071288	-0.892482	0.00120623	0.648608	0.0587943	0.84173	0.00443241	-0.517279	0.153817	-0.665346	0.0504884	0.518152	0.153001	0.560695	0.11631	0.597157	0.0895335	-0.48406	0.186709	0.29597	0.439353	-0.560011	0.116853	0.0253528	0.948379	0.609823	0.0812159	0.306376	0.422639	0.0969812	0.803974	0.528	0.143979	-0.000630869	0.998715	0.123829	0.750938	0.0719087	0.854139	-0.0746418	0.848645	0.227428	0.556196	0.189052	0.626153	-0.0788953	0.840107
Unigene44599_DB	blue	0.590371	0.0941961	-0.949458	9.09463e-05	0.670615	0.0480385	0.798313	0.00989771	-0.647208	0.059526	-0.478723	0.192334	0.766584	0.0159624	0.514855	0.156094	0.167465	0.666715	-0.141413	0.716674	0.357953	0.344227	-0.580038	0.101577	0.435404	0.241452	0.385743	0.305205	0.42772	0.250803	-0.0305981	0.937715	0.56221	0.115113	-0.0757922	0.846335	0.281627	0.462854	0.136339	0.726518	-0.0370417	0.924625	0.106902	0.784285	0.51613	0.154894	0.045685	0.907093
CL10572.Contig1_DB	blue	0.748132	0.0204278	-0.652618	0.0567312	0.682083	0.0429727	0.59513	0.0909109	-0.642783	0.0618754	-0.635704	0.0657538	0.296299	0.43882	0.441061	0.23469	0.296267	0.438871	-0.490861	0.179679	0.349108	0.357131	-0.252608	0.511976	0.0856184	0.826642	0.23083	0.550139	0.528412	0.143609	0.582897	0.0995003	0.152308	0.695657	0.267815	0.485979	0.0153855	0.968663	-0.196859	0.611688	0.423623	0.255865	-0.18957	0.625191	-0.163718	0.673836	0.0592215	0.879707
Unigene3062_DB	blue	0.548839	0.12594	-0.92592	0.000338684	0.688775	0.0401823	0.815604	0.00736431	-0.523846	0.147746	-0.643247	0.0616261	0.557353	0.118979	0.418638	0.2621	0.508828	0.161838	-0.26197	0.495905	0.225135	0.560292	-0.610891	0.0805377	0.230349	0.550995	0.570331	0.10882	0.235224	0.542354	-0.0978288	0.802287	0.592201	0.0929242	-0.0751079	0.847709	0.228434	0.554403	0.119718	0.759006	0.0139769	0.971531	0.224668	0.561128	0.39736	0.289594	-0.164192	0.672934
CL2927.Contig5_DB	blue	0.628888	0.069629	-0.929476	0.000286129	0.659821	0.0531418	0.833662	0.00523119	-0.582298	0.0999331	-0.477918	0.193191	0.703638	0.0344102	0.548559	0.126173	0.175965	0.650649	-0.384994	0.306225	0.409535	0.273686	-0.549355	0.125512	0.260621	0.498208	0.309966	0.41694	0.437012	0.239519	0.121173	0.756149	0.549495	0.125395	-0.0904707	0.816947	0.0738555	0.850225	0.096215	0.805498	-0.142728	0.714128	0.210176	0.587284	0.351737	0.353271	0.0377599	0.923168
CL4974.Contig2_DB	blue	0.660131	0.0529904	-0.941782	0.000148043	0.645156	0.0606081	0.8943	0.00113841	-0.59338	0.0921108	-0.480297	0.190666	0.732714	0.0247378	0.70143	0.0352312	0.33352	0.380429	-0.431415	0.246282	0.499806	0.170664	-0.55896	0.117691	0.169189	0.663447	0.545423	0.128799	0.556046	0.120032	0.217636	0.573765	0.553971	0.121716	0.0466685	0.9051	0.170806	0.660385	0.189066	0.626127	-0.109345	0.779452	0.122229	0.754076	0.315563	0.408126	0.0785395	0.840821
CL6476.Contig1_DB	blue	-0.595443	0.0906975	0.975089	7.84003e-06	-0.773447	0.0144842	-0.845794	0.0040637	0.630695	0.0685883	0.551374	0.123842	-0.653112	0.0564804	-0.524029	0.147579	-0.300859	0.431464	0.242262	0.529973	-0.376173	0.318378	0.626453	0.0710476	-0.315745	0.40784	-0.52044	0.150877	-0.489607	0.180963	-0.138272	0.722764	-0.598699	0.088494	-0.0106649	0.978276	-0.264408	0.491755	-0.182799	0.63782	-0.188631	0.626937	-0.069778	0.858425	-0.453858	0.219777	0.0798474	0.838198
CL17165.Contig1_DB	blue	0.723396	0.027612	-0.825425	0.00614284	0.604124	0.0848964	0.62351	0.0727855	-0.853507	0.0034227	-0.560877	0.116166	0.799261	0.00974552	0.747003	0.0207249	0.395102	0.292595	0.0143668	0.970737	0.255706	0.506636	-0.409736	0.273428	0.433616	0.24361	0.465233	0.206971	0.341673	0.368157	0.00758829	0.984542	0.259924	0.499399	0.124257	0.750101	0.545571	0.128674	-0.0971446	0.803648	-0.105347	0.787364	-0.185684	0.632429	0.331618	0.383321	0.390809	0.298345
Unigene38237_DB	blue	0.564054	0.113665	-0.830916	0.00552409	0.621082	0.0742393	0.611973	0.0798534	-0.652666	0.0567067	-0.839599	0.00463462	0.386334	0.304401	0.428869	0.249392	0.524207	0.147416	-0.23697	0.539272	-0.0457537	0.906954	-0.583066	0.0993782	0.0869476	0.823984	0.458168	0.214875	0.0912622	0.815368	-0.10647	0.78514	0.425503	0.253536	-0.166723	0.668124	0.251209	0.514396	-0.202619	0.601091	0.0241636	0.950798	0.205322	0.596139	0.189884	0.624606	-0.0208749	0.957489
Unigene36347_DB	blue	0.698803	0.0362243	-0.906724	0.000744178	0.709063	0.032446	0.889973	0.00130433	-0.61892	0.0755489	-0.359254	0.342347	0.824074	0.006302	0.711701	0.0315178	0.368696	0.328865	-0.269616	0.482936	0.624886	0.0719694	-0.448129	0.226387	0.37306	0.322724	0.589404	0.0948724	0.620593	0.0745339	0.277954	0.468956	0.471766	0.199808	0.261878	0.496063	0.316141	0.40722	0.287299	0.453497	0.0349622	0.928848	-0.115735	0.766842	0.393717	0.294444	0.108676	0.780775
CL2084.Contig1_DB	blue	0.566274	0.111937	-0.900673	0.000921673	0.876264	0.00194018	0.912587	0.000596419	-0.392023	0.296713	-0.400849	0.284988	0.560603	0.116383	0.424283	0.255046	0.506296	0.164288	-0.402364	0.282999	0.514658	0.156279	-0.509501	0.161191	0.259681	0.499816	0.531523	0.14083	0.381698	0.310738	0.293265	0.443744	0.592411	0.0927794	0.173421	0.655445	0.0781906	0.841521	0.347074	0.360132	0.221359	0.56706	0.0905765	0.816736	0.39448	0.293424	-0.305248	0.424437
CL14537.Contig2_DB	blue	0.567214	0.11121	-0.828122	0.0058333	0.721296	0.0282883	0.630744	0.0685597	-0.718927	0.0290647	-0.628389	0.0699181	0.429543	0.248567	0.538273	0.134908	0.188882	0.626469	-0.246867	0.521932	0.231677	0.548635	-0.570626	0.108595	0.141632	0.716249	0.417843	0.2631	0.553757	0.12189	0.37004	0.326967	0.424525	0.254746	0.0375196	0.923655	0.260261	0.498823	-0.0259956	0.947072	0.433981	0.243169	-0.0767542	0.844403	0.226952	0.557044	0.0290149	0.940933
CL1866.Contig2_DB	blue	0.6612	0.0524712	-0.915068	0.000540588	0.55993	0.116918	0.836492	0.00494067	-0.67134	0.0477076	-0.607891	0.0824524	0.677276	0.0450524	0.665299	0.0505106	0.367606	0.330407	-0.301791	0.429968	0.415865	0.265601	-0.562913	0.11456	0.192485	0.619779	0.685071	0.0417118	0.623968	0.0725133	0.11359	0.771069	0.508668	0.161992	0.0874303	0.823019	0.343315	0.365708	0.132991	0.733034	0.0572006	0.883789	0.00714725	0.98544	0.290163	0.448803	0.110383	0.777401
Unigene35989_DB	blue	-0.704865	0.0339592	0.922221	0.000400174	-0.656684	0.0546866	-0.838954	0.00469709	0.682107	0.0429627	0.580252	0.10142	-0.666169	0.050101	-0.590711	0.0939591	-0.253944	0.50967	0.343376	0.365617	-0.456914	0.216294	0.520197	0.151102	-0.267847	0.485924	-0.497396	0.173066	-0.630954	0.0684399	-0.221608	0.566614	-0.483268	0.187538	-0.0928817	0.812138	-0.228705	0.553919	-0.0906882	0.816513	-0.133589	0.731869	0.00765571	0.984405	-0.27141	0.479915	-0.0727151	0.852517
CL6963.Contig1_DB	blue	0.556906	0.119338	-0.94793	0.000100788	0.685178	0.0416671	0.86327	0.0027156	-0.502913	0.167594	-0.62263	0.0733102	0.55672	0.119488	0.53828	0.134903	0.508944	0.161727	-0.429845	0.248197	0.281332	0.463343	-0.651103	0.0575051	0.0694877	0.859009	0.59171	0.0932647	0.299767	0.43322	0.0426756	0.913194	0.630954	0.0684395	-0.0949509	0.808015	0.131462	0.736015	0.143788	0.712077	-0.0747862	0.848355	0.298046	0.435996	0.329889	0.385957	-0.134492	0.730111
CL106.Contig4_DB	blue	-0.618277	0.0759407	0.915232	0.000537031	-0.651612	0.0572444	-0.674309	0.0463672	0.756171	0.0183923	0.767977	0.0156546	-0.550118	0.124879	-0.551214	0.123974	-0.335031	0.378142	0.219116	0.571097	-0.0818251	0.834234	0.625862	0.0713943	-0.18309	0.637275	-0.415943	0.265502	-0.282488	0.461429	0.0179455	0.963452	-0.469297	0.202498	0.16453	0.672291	-0.287996	0.452353	0.151414	0.697375	-0.00948209	0.980685	-0.15091	0.698344	-0.282544	0.461336	-0.0968932	0.804149
CL3854.Contig1_DB	blue	-0.665656	0.0503424	0.945314	0.000119338	-0.754474	0.0188101	-0.892843	0.00119253	0.563316	0.114243	0.577955	0.103106	-0.614728	0.0781288	-0.636189	0.0654831	-0.522186	0.149267	0.480884	0.190046	-0.412392	0.270021	0.566617	0.111672	-0.107065	0.783961	-0.56943	0.109508	-0.404432	0.280297	-0.239552	0.534727	-0.548207	0.126466	-0.0614395	0.87523	-0.128918	0.740981	-0.140871	0.717724	0.0214662	0.956286	-0.154544	0.691364	-0.259819	0.49958	0.0511706	0.895983
CL13548.Contig1_DB	blue	-0.729337	0.0257556	0.900824	0.0009169	-0.601194	0.0868283	-0.763661	0.0166214	0.726903	0.0265059	0.685574	0.041502	-0.665516	0.0504081	-0.65461	0.0557237	-0.407172	0.276737	0.334439	0.379036	-0.272621	0.477878	0.51012	0.160597	-0.193246	0.618368	-0.457382	0.215763	-0.368646	0.328935	-0.0506799	0.896976	-0.41096	0.271855	0.0215059	0.956205	-0.245815	0.523766	0.0951497	0.807619	0.157812	0.685106	-0.101722	0.794552	-0.199292	0.607203	-0.190743	0.623011
CL1728.Contig1_DB	blue	-0.594769	0.0911576	0.914517	0.000552658	-0.843101	0.00430561	-0.865258	0.00258515	0.450002	0.224214	0.539399	0.133936	-0.500477	0.169998	-0.282412	0.461554	-0.364482	0.33485	0.405133	0.279384	-0.385485	0.305556	0.523239	0.148301	-0.296598	0.438336	-0.346075	0.36161	-0.322618	0.397136	-0.167665	0.666336	-0.57752	0.103426	-0.015011	0.969426	0.00399999	0.991851	-0.163275	0.67468	-0.211759	0.584405	-0.185823	0.632169	-0.343092	0.36604	0.308931	0.41858
CL14752.Contig1_DB	blue	0.670467	0.0481066	-0.9283	0.000302818	0.699518	0.0359523	0.860903	0.0028768	-0.633318	0.0670944	-0.354049	0.349894	0.852347	0.00351427	0.686672	0.0410462	0.25288	0.511506	-0.248781	0.518605	0.552873	0.122612	-0.488308	0.1823	0.398149	0.288549	0.44962	0.224656	0.537752	0.13536	0.191315	0.62195	0.501091	0.169389	0.115234	0.767829	0.265171	0.49046	0.226577	0.557715	-0.0923204	0.813257	-0.00722281	0.985286	0.445174	0.229838	0.135665	0.72783
Unigene3183_DB	blue	-0.579999	0.101605	0.984323	1.56416e-06	-0.734739	0.0241405	-0.835906	0.00499994	0.609149	0.0816462	0.627672	0.0703348	-0.611382	0.0802267	-0.51131	0.159458	-0.346385	0.361151	0.309839	0.417141	-0.272387	0.478272	0.666931	0.0497436	-0.218918	0.571453	-0.49009	0.180468	-0.36363	0.336065	-0.0397983	0.91903	-0.622628	0.0733112	0.1159	0.766517	-0.195043	0.615043	-0.102062	0.793877	-0.0353435	0.928074	-0.219359	0.570658	-0.410601	0.272316	0.0885658	0.82075
CL13986.Contig5_DB	blue	0.733381	0.0245402	-0.864381	0.0026422	0.657754	0.0541563	0.855529	0.00326693	-0.571754	0.107739	-0.397004	0.290066	0.844598	0.00416995	0.5325	0.139963	0.442736	0.232708	-0.186835	0.630281	0.53196	0.140441	-0.337591	0.374278	0.531851	0.140538	0.449533	0.224757	0.358159	0.343929	-0.0185549	0.962211	0.398675	0.287854	0.200726	0.604567	0.282264	0.461799	0.174936	0.652587	-0.171177	0.659684	-0.0347049	0.929371	0.394306	0.293657	0.0858676	0.826143
CL5222.Contig1_DB	blue	-0.625032	0.0718833	0.958579	4.57275e-05	-0.73792	0.0232216	-0.829283	0.00570341	0.593519	0.0920152	0.589503	0.0948033	-0.656351	0.0548525	-0.511492	0.159285	-0.388597	0.301331	0.322262	0.397687	-0.28686	0.454219	0.586998	0.0965683	-0.266811	0.487677	-0.400526	0.285412	-0.25941	0.50028	-0.00901649	0.981633	-0.560937	0.116119	0.0994739	0.799017	-0.150294	0.699529	-0.0589491	0.880257	0.111979	0.774248	-0.231763	0.548482	-0.381591	0.310886	0.0449884	0.908505
Unigene4965_DB	blue	0.573009	0.106791	-0.975247	7.66887e-06	0.729357	0.0257494	0.930559	0.000271332	-0.499178	0.171288	-0.465534	0.206637	0.676754	0.045282	0.617681	0.0763054	0.404017	0.280838	-0.430627	0.247242	0.467129	0.204877	-0.634959	0.0661704	0.151828	0.696578	0.592944	0.0924109	0.466858	0.205175	0.184651	0.634357	0.660599	0.0527629	0.00193663	0.996055	0.138406	0.722504	0.289605	0.449716	-0.0410389	0.916514	0.211065	0.585666	0.41249	0.269896	-0.102791	0.792431
CL21003.Contig1_DB	blue	0.578363	0.102805	-0.93758	0.000188154	0.574337	0.105794	0.806861	0.0085819	-0.588184	0.0957297	-0.680446	0.0436738	0.570432	0.108743	0.523638	0.147936	0.3223	0.397629	-0.395867	0.291577	0.228841	0.553676	-0.651419	0.0573435	0.0932671	0.81137	0.490924	0.179614	0.372663	0.32328	-0.0297038	0.939532	0.594687	0.091214	-0.188044	0.628029	0.139384	0.720607	0.0231585	0.952843	-0.114446	0.769383	0.304701	0.42531	0.291495	0.446627	-0.0154538	0.968524
CL958.Contig1_DB	blue	-0.725588	0.0269172	0.92763	0.000312637	-0.725803	0.0268495	-0.937875	0.00018512	0.551875	0.123431	0.491819	0.1787	-0.706025	0.0335364	-0.590114	0.0943756	-0.458426	0.214583	0.435844	0.240921	-0.565582	0.112474	0.463299	0.209118	-0.271323	0.48006	-0.555076	0.120817	-0.522408	0.149063	-0.233813	0.54485	-0.506479	0.164111	-0.186119	0.631616	-0.151685	0.696854	-0.213252	0.581696	-0.0126124	0.97431	-0.0406061	0.917391	-0.283391	0.459935	0.0308752	0.937152
CL19767.Contig4_DB	blue	0.493552	0.176939	-0.914503	0.000552963	0.763341	0.0166947	0.793062	0.0107699	-0.502335	0.168163	-0.547353	0.127179	0.448867	0.225529	0.341256	0.368779	0.141727	0.716065	-0.387309	0.303076	0.31266	0.412686	-0.644754	0.060822	0.174878	0.652696	0.340683	0.369636	0.467124	0.204883	0.227693	0.555722	0.636477	0.065323	-0.115731	0.766851	0.020243	0.958775	0.147927	0.704087	0.292018	0.445775	0.215593	0.577456	0.363908	0.335668	-0.245125	0.524968
Unigene44668_DB	blue	-0.593276	0.092182	0.967562	1.96098e-05	-0.74454	0.0213834	-0.774834	0.0141969	0.685264	0.0416315	0.607277	0.0828479	-0.665362	0.0504811	-0.571277	0.108101	-0.339705	0.371102	0.194571	0.615915	-0.23674	0.539678	0.64067	0.0630173	-0.290479	0.448287	-0.462081	0.210476	-0.326372	0.391347	-0.0256309	0.947814	-0.558871	0.117762	0.0935096	0.810886	-0.295764	0.439686	-0.0546479	0.888949	-0.0135943	0.97231	-0.13429	0.730505	-0.443622	0.231662	-0.0169182	0.965543
CL3888.Contig2_DB	blue	0.590605	0.0940332	-0.947951	0.000100643	0.78683	0.0118705	0.934438	0.00022275	-0.470521	0.201161	-0.400762	0.285101	0.666439	0.049974	0.627938	0.0701803	0.426087	0.252814	-0.471133	0.200496	0.532944	0.139571	-0.579403	0.102041	0.153385	0.693589	0.558351	0.118178	0.475143	0.19616	0.311383	0.4147	0.623242	0.0729449	0.0864168	0.825045	0.0924807	0.812938	0.31877	0.403113	0.00412535	0.991596	0.156631	0.687365	0.37998	0.313104	-0.120052	0.758351
CL3710.Contig2_DB	blue	0.605455	0.0840275	-0.941111	0.000154003	0.734622	0.0241749	0.881249	0.00168864	-0.531717	0.140658	-0.370028	0.326985	0.735833	0.0238217	0.541164	0.132418	0.170397	0.66116	-0.368687	0.328877	0.517568	0.153547	-0.543663	0.130287	0.32124	0.399272	0.341987	0.367688	0.49839	0.172073	0.210345	0.586976	0.589036	0.0951309	-0.00502446	0.989764	0.07755	0.842806	0.234741	0.543208	-0.042532	0.913485	0.153019	0.69429	0.432588	0.244856	-0.0368492	0.925016
CL6382.Contig1_DB	blue	0.59384	0.0917944	-0.958878	4.45986e-05	0.752057	0.0194163	0.912609	0.000595921	-0.535817	0.137046	-0.409891	0.273229	0.757205	0.0181406	0.637663	0.0646654	0.454012	0.219601	-0.282176	0.461945	0.500549	0.169927	-0.576102	0.104477	0.29697	0.437733	0.633437	0.0670271	0.45353	0.220152	0.144573	0.710559	0.605613	0.0839251	0.107023	0.784045	0.274603	0.474554	0.326545	0.39108	-0.0113455	0.97689	0.0760344	0.845848	0.486005	0.184683	-0.0533791	0.891515
Unigene41836_DB	blue	-0.773477	0.0144778	0.87336	0.00209803	-0.731418	0.0251252	-0.814526	0.00750757	0.6313	0.0682417	0.434592	0.24243	-0.790452	0.0112221	-0.57096	0.108341	-0.335632	0.377232	0.314791	0.409335	-0.481591	0.1893	0.349508	0.356542	-0.438231	0.238059	-0.24319	0.528349	-0.329214	0.386989	-0.149498	0.70106	-0.363272	0.336577	-0.115869	0.766578	-0.130788	0.737329	-0.0277008	0.943604	0.194311	0.616398	-0.0245283	0.950057	-0.288711	0.451181	-0.135735	0.727694
Unigene37685_DB	blue	0.665189	0.050563	-0.924919	0.000354617	0.630679	0.068597	0.890025	0.00130223	-0.540093	0.133338	-0.457044	0.216146	0.77546	0.0140684	0.551276	0.123923	0.346046	0.361653	-0.34291	0.366311	0.473286	0.198161	-0.488631	0.181967	0.335701	0.377128	0.441067	0.234683	0.395763	0.291715	0.00659729	0.986561	0.533619	0.138975	0.0115317	0.97651	0.15173	0.696766	0.170758	0.660477	-0.224529	0.561376	0.170993	0.660033	0.379331	0.314	0.028732	0.941508
CL2951.Contig2_DB	blue	-0.644529	0.0609415	0.900948	0.000913003	-0.695043	0.0376772	-0.834726	0.00512062	0.553381	0.122197	0.697352	0.0367806	-0.437702	0.238692	-0.484559	0.186189	-0.404838	0.279769	0.551943	0.123375	-0.325816	0.392201	0.571391	0.108014	-0.0187864	0.96174	-0.488501	0.182101	-0.459385	0.213501	-0.259133	0.500753	-0.530999	0.141296	0.00901447	0.981637	-0.0256637	0.947747	-0.0290597	0.940842	-0.147566	0.704784	-0.192407	0.619924	-0.130398	0.738091	0.125082	0.748483
CL20487.Contig1_DB	blue	0.691697	0.0390017	-0.818195	0.00702736	0.690395	0.039525	0.86521	0.00258825	-0.406118	0.278104	-0.513539	0.157338	0.592772	0.0925301	0.338964	0.372213	0.615896	0.0774043	-0.38886	0.300976	0.439958	0.236	-0.331124	0.384073	0.339416	0.371535	0.446234	0.228597	0.201663	0.602844	-0.00020021	0.999592	0.421921	0.257984	0.163416	0.674412	0.0678706	0.862265	0.13347	0.732101	-0.0855547	0.826769	0.123764	0.751066	0.232479	0.547213	-0.169496	0.662866
CL5393.Contig1_DB	blue	0.655727	0.0551638	-0.864746	0.00261834	0.622068	0.0736469	0.666474	0.0499575	-0.835018	0.00509064	-0.535071	0.137698	0.78436	0.0123268	0.721727	0.0281486	0.319633	0.401769	0.0531963	0.891885	0.31033	0.416364	-0.495984	0.174482	0.442378	0.23313	0.581932	0.100198	0.504386	0.166149	0.0516772	0.894958	0.363035	0.336916	0.142993	0.713616	0.601989	0.0863012	0.0431087	0.912316	0.102288	0.793429	-0.222745	0.564574	0.430974	0.246819	0.296091	0.439156
CL13705.Contig5_DB	blue	-0.592377	0.0928027	0.979683	3.85871e-06	-0.82461	0.0062385	-0.896309	0.00106662	0.531957	0.140445	0.495006	0.175468	-0.643612	0.0614308	-0.529077	0.143012	-0.374893	0.320161	0.383729	0.307954	-0.415269	0.266357	0.614864	0.0780441	-0.239439	0.534926	-0.466813	0.205225	-0.388888	0.300938	-0.19415	0.616695	-0.62918	0.0694603	0.00956147	0.980523	-0.113814	0.770628	-0.21844	0.572315	-0.0520379	0.894228	-0.187096	0.629794	-0.424199	0.25515	0.14837	0.703232
CL1946.Contig1_DB	blue	0.496914	0.173549	-0.95936	4.28154e-05	0.658602	0.0537386	0.824965	0.00619663	-0.535014	0.137749	-0.666431	0.0499777	0.471493	0.200104	0.508014	0.162624	0.309494	0.417687	-0.45728	0.215879	0.229915	0.551766	-0.74214	0.0220382	-0.0132771	0.972956	0.541635	0.132015	0.427643	0.250897	0.114639	0.769003	0.685316	0.0416096	-0.199674	0.6065	0.0895223	0.81884	0.112559	0.773103	0.071097	0.855771	0.333177	0.38095	0.318762	0.403126	-0.152277	0.695716
CL518.Contig1_DB	blue	-0.686094	0.0412857	0.949253	9.22223e-05	-0.779398	0.0132789	-0.926468	0.000330167	0.539242	0.134071	0.416003	0.265427	-0.773081	0.0145606	-0.522473	0.149004	-0.381138	0.311508	0.323023	0.396511	-0.546089	0.128239	0.473	0.19847	-0.418019	0.262878	-0.44222	0.233317	-0.424857	0.254335	-0.135638	0.727882	-0.539352	0.133976	-0.12194	0.754643	-0.159028	0.68278	-0.242134	0.530198	0.035545	0.927664	-0.0733617	0.851217	-0.42626	0.252601	0.0625339	0.873021
Unigene1652_DB	blue	-0.637661	0.0646667	0.957557	4.975e-05	-0.764242	0.016489	-0.864501	0.00263434	0.58327	0.0992316	0.526602	0.145241	-0.638001	0.0644787	-0.607636	0.0826167	-0.319053	0.402671	0.464989	0.207241	-0.404512	0.280193	0.592666	0.0926032	-0.15193	0.696383	-0.40558	0.278803	-0.42883	0.24944	-0.259654	0.499861	-0.571629	0.107834	0.0357906	0.927166	-0.0659486	0.866137	-0.116192	0.765943	0.0359543	0.926833	-0.197013	0.611404	-0.310165	0.416625	0.0282676	0.942452
CL5281.Contig1_DB	blue	0.465626	0.206536	-0.938622	0.000177574	0.793809	0.0106428	0.775509	0.0140586	-0.572345	0.107292	-0.523993	0.147612	0.542557	0.131228	0.461056	0.211624	0.272642	0.477843	-0.188492	0.627195	0.284972	0.457326	-0.685791	0.0414119	0.253807	0.509907	0.526237	0.145572	0.440155	0.235766	0.156517	0.687585	0.641221	0.0627185	-0.0442938	0.909913	0.268063	0.485559	0.222501	0.56501	0.316291	0.406985	0.0952905	0.807339	0.505571	0.164993	-0.178969	0.644999
Unigene38857_DB	blue	0.498386	0.172077	-0.975598	7.29712e-06	0.738536	0.0230462	0.910629	0.00064323	-0.436694	0.2399	-0.5272	0.1447	0.543839	0.130139	0.45943	0.213451	0.334265	0.3793	-0.469128	0.202682	0.374493	0.320719	-0.695518	0.0374917	0.0984544	0.801043	0.525248	0.146468	0.421702	0.258258	0.144418	0.71086	0.726219	0.0267192	-0.116494	0.765348	0.0347281	0.929324	0.26499	0.490767	0.0620556	0.873986	0.326228	0.391567	0.409083	0.274269	-0.25369	0.510109
CL3486.Contig1_DB	blue	0.58378	0.0988646	-0.862392	0.00277466	0.836522	0.0049377	0.880647	0.00171773	-0.352972	0.351466	-0.388989	0.3008	0.599247	0.0881263	0.239344	0.535093	0.488005	0.182612	-0.284941	0.457376	0.470433	0.201257	-0.406719	0.277324	0.46301	0.209439	0.38264	0.309445	0.210825	0.586103	0.0479353	0.902534	0.535816	0.137047	0.135735	0.727693	0.0630915	0.871897	0.285938	0.455735	0.105096	0.787862	0.120764	0.756952	0.440399	0.235475	-0.332411	0.382115
CL23720.Contig1_DB	blue	0.550319	0.124713	-0.985024	1.33383e-06	0.697918	0.0365631	0.866575	0.00250117	-0.59525	0.090829	-0.443739	0.231525	0.747939	0.0204785	0.626702	0.0709012	0.223178	0.563796	-0.271039	0.480539	0.423383	0.256164	-0.662278	0.0519512	0.27055	0.481361	0.516713	0.154347	0.513088	0.157766	0.11418	0.769907	0.652386	0.0568496	-0.0622514	0.873591	0.241123	0.531969	0.252143	0.51278	-0.0248093	0.949485	0.15768	0.685358	0.512029	0.158772	-0.000215916	0.99956
CL9621.Contig3_DB	blue	0.65082	0.0576506	-0.872661	0.00213737	0.61512	0.0778851	0.683086	0.0425471	-0.83348	0.00525029	-0.532076	0.140339	0.764736	0.0163769	0.772658	0.0146491	0.288209	0.452003	-0.0224664	0.954251	0.340761	0.369519	-0.525351	0.146375	0.356937	0.345697	0.605447	0.0840332	0.584216	0.0985512	0.145667	0.708446	0.385828	0.305089	0.141171	0.717142	0.565731	0.112358	0.0611246	0.875865	0.124709	0.749214	-0.210253	0.587143	0.394718	0.293108	0.304131	0.42622
CL13296.Contig1_DB	blue	0.654234	0.0559128	-0.832768	0.00532535	0.574361	0.105776	0.69407	0.0380596	-0.720037	0.0286994	-0.686228	0.0412302	0.62175	0.0738374	0.60048	0.0873031	0.568091	0.110534	-0.0806447	0.8366	0.223022	0.564077	-0.481086	0.189832	0.291072	0.447319	0.69733	0.0367893	0.362447	0.337758	-0.0587308	0.880698	0.368136	0.329657	0.133004	0.73301	0.514449	0.156476	-0.000648354	0.998679	0.081435	0.835016	-0.100091	0.797791	0.288269	0.451904	0.139566	0.720254
CL17329.Contig1_DB	blue	0.592974	0.0923903	-0.941493	0.00015059	0.649301	0.0584344	0.928438	0.000300828	-0.500023	0.170447	-0.510642	0.160097	0.643004	0.0617566	0.507485	0.163135	0.364322	0.335078	-0.376307	0.318191	0.499342	0.171124	-0.582387	0.0998685	0.226906	0.557127	0.647665	0.0592864	0.582732	0.0996197	0.120466	0.757538	0.627857	0.0702271	0.072588	0.852773	0.191471	0.62166	0.295919	0.439435	0.109686	0.778777	0.119926	0.758599	0.381266	0.311332	-0.13081	0.737287
Unigene32244_DB	blue	0.578973	0.102357	-0.979067	4.28094e-06	0.677727	0.0448545	0.930316	0.000274599	-0.525169	0.14654	-0.453818	0.219822	0.723973	0.027428	0.609761	0.0812553	0.320987	0.399665	-0.380294	0.312671	0.489461	0.181113	-0.630223	0.0688588	0.213635	0.581001	0.586173	0.097154	0.531262	0.141062	0.131034	0.736849	0.661004	0.0525661	-0.00677955	0.986189	0.177229	0.648269	0.295625	0.439911	-0.0492108	0.899951	0.187222	0.629559	0.44406	0.231147	-0.0588027	0.880553
Unigene40987_DB	blue	0.508157	0.162486	-0.843182	0.00429821	0.819776	0.00682699	0.748015	0.0204584	-0.381183	0.311447	-0.535204	0.137582	0.419224	0.261363	0.135513	0.728126	0.35195	0.352959	-0.33257	0.381873	0.206285	0.594377	-0.495399	0.175071	0.315256	0.408606	0.165512	0.670425	0.0482154	0.901967	-0.00240948	0.995091	0.541786	0.131886	-0.131122	0.736678	-0.0741508	0.849632	0.0568849	0.884427	0.0870173	0.823845	0.308522	0.419227	0.357416	0.345004	-0.357602	0.344734
CL2274.Contig1_DB	blue	0.50779	0.16284	-0.945951	0.000114619	0.721368	0.0282651	0.840087	0.00458781	-0.44473	0.230359	-0.555594	0.120397	0.536209	0.136703	0.394022	0.294036	0.309736	0.417304	-0.445595	0.229344	0.258268	0.502235	-0.653158	0.0564568	0.136099	0.726986	0.340919	0.369284	0.227159	0.556676	0.0209475	0.957342	0.667524	0.0494666	-0.228454	0.554366	-0.0311774	0.936537	0.1198	0.758846	-0.108786	0.780556	0.414933	0.266783	0.38172	0.310709	-0.21272	0.582661
CL10720.Contig1_DB	blue	0.597552	0.0892666	-0.94197	0.000146405	0.669222	0.048679	0.864607	0.00262741	-0.601536	0.0866014	-0.462107	0.210447	0.680066	0.0438378	0.668912	0.0488219	0.211813	0.584306	-0.394875	0.292898	0.489408	0.181168	-0.611856	0.0799276	0.161123	0.678781	0.534127	0.138528	0.648369	0.0589193	0.294844	0.441177	0.592394	0.092791	0.0278832	0.943234	0.18205	0.639221	0.224836	0.560827	0.0687236	0.860547	0.0887946	0.820293	0.35829	0.343739	0.0330708	0.93269
Unigene35595_DB	blue	0.500263	0.17021	-0.985169	1.2893e-06	0.734201	0.0242983	0.89879	0.000982411	-0.484423	0.18633	-0.470264	0.201442	0.621748	0.0738388	0.471621	0.199964	0.217785	0.573495	-0.373878	0.321579	0.411702	0.270904	-0.689457	0.0399049	0.209331	0.588821	0.483928	0.186847	0.4886	0.181999	0.132336	0.734311	0.721035	0.0283733	-0.108159	0.781798	0.0966455	0.804642	0.287263	0.453555	0.0828567	0.832168	0.261298	0.497052	0.486376	0.184298	-0.194133	0.616726
CL14729.Contig2_DB	blue	0.582474	0.0998058	-0.91422	0.000559237	0.793752	0.0106525	0.906702	0.000744768	-0.480701	0.190238	-0.417586	0.263425	0.61802	0.076098	0.603811	0.0851017	0.479556	0.19145	-0.403788	0.281137	0.532742	0.139749	-0.553708	0.12193	0.173752	0.654819	0.647135	0.0595642	0.521264	0.150116	0.342681	0.366652	0.586626	0.096832	0.183915	0.635732	0.179895	0.643261	0.341654	0.368185	0.175489	0.651544	0.0397078	0.919214	0.369346	0.327947	-0.146223	0.707374
CL4619.Contig1_DB	blue	0.465606	0.206558	-0.978884	4.41264e-06	0.78044	0.0130748	0.828988	0.00573622	-0.541788	0.131884	-0.482015	0.188854	0.620933	0.0743289	0.494987	0.175487	0.26083	0.497852	-0.231745	0.548514	0.317206	0.405554	-0.712446	0.0312589	0.255942	0.50623	0.503818	0.166706	0.40478	0.279844	0.0961574	0.805613	0.696598	0.0370719	-0.109901	0.778352	0.219528	0.570354	0.258888	0.501174	0.138006	0.72328	0.198127	0.609349	0.554418	0.121352	-0.166743	0.668086
Unigene3486_DB	blue	-0.653579	0.0562437	0.909624	0.000668236	-0.853891	0.0033927	-0.92392	0.000371041	0.46334	0.209072	0.468882	0.202952	-0.582277	0.0999486	-0.48053	0.190419	-0.526129	0.145669	0.446542	0.228237	-0.531411	0.14093	0.478279	0.192806	-0.246635	0.522337	-0.537747	0.135365	-0.431568	0.246096	-0.320546	0.40035	-0.538647	0.134585	-0.208773	0.589838	-0.08837	0.821142	-0.268757	0.484387	-0.194762	0.615562	-0.0504749	0.897391	-0.3076	0.420692	0.218679	0.571884
CL8702.Contig1_DB	blue	0.520287	0.151018	-0.940739	0.000157373	0.803057	0.00915186	0.902818	0.000855715	-0.415969	0.265469	-0.489887	0.180676	0.551397	0.123824	0.504315	0.166219	0.531897	0.140497	-0.434933	0.24202	0.391668	0.29719	-0.626593	0.0709651	0.117237	0.763885	0.596411	0.0900388	0.320921	0.399767	0.183059	0.637333	0.661205	0.0524688	0.0126028	0.974329	0.0943171	0.809278	0.293657	0.443106	0.0599271	0.878282	0.239585	0.534669	0.397993	0.288756	-0.257402	0.503721
CL9800.Contig6_DB	blue	0.627572	0.0703936	-0.948862	9.46994e-05	0.574897	0.105375	0.847298	0.00393268	-0.657099	0.0544805	-0.542998	0.130853	0.76591	0.0161127	0.697168	0.0368517	0.352727	0.351824	-0.255594	0.506828	0.398101	0.288612	-0.599711	0.0878156	0.240268	0.53347	0.63972	0.0635355	0.523428	0.148128	0.0208255	0.95759	0.557302	0.119019	0.00376916	0.992322	0.347389	0.359667	0.164376	0.672585	-0.113667	0.770918	0.0910079	0.815875	0.4003	0.285711	0.130923	0.737066
CL8038.Contig3_DB	blue	0.648493	0.0588545	-0.856447	0.00319787	0.875764	0.00196673	0.881202	0.00169088	-0.440517	0.235335	-0.211253	0.585325	0.721256	0.0283016	0.500292	0.170181	0.296711	0.438152	-0.386626	0.304003	0.658052	0.0540094	-0.36619	0.332417	0.412844	0.269444	0.272247	0.478506	0.434549	0.242482	0.412698	0.26963	0.473564	0.197861	0.231539	0.54888	0.0137458	0.972002	0.312274	0.413295	0.061035	0.876046	-0.00433311	0.991173	0.388673	0.301228	-0.110909	0.776362
CL19355.Contig1_DB	blue	-0.592172	0.0929448	0.969118	1.65351e-05	-0.767965	0.0156571	-0.81096	0.00799538	0.670294	0.0481857	0.581778	0.10031	-0.63717	0.0649384	-0.643049	0.0617322	-0.365798	0.332974	0.273565	0.476294	-0.318377	0.403726	0.65639	0.0548332	-0.19932	0.607153	-0.560516	0.116452	-0.453898	0.219731	-0.191647	0.621332	-0.577434	0.10349	0.00849664	0.982692	-0.289297	0.45022	-0.13129	0.73635	-0.123233	0.752107	-0.080635	0.836619	-0.40429	0.280482	0.00199736	0.995931
Unigene38881_DB	blue	-0.658125	0.0539734	0.960026	4.0435e-05	-0.770481	0.0151112	-0.93353	0.000233518	0.505186	0.165369	0.473006	0.198463	-0.683656	0.0423059	-0.524357	0.147279	-0.37379	0.321702	0.461133	0.211537	-0.496988	0.173475	0.534773	0.13796	-0.255478	0.507028	-0.427328	0.251284	-0.414711	0.267065	-0.18865	0.626901	-0.586816	0.0966969	-0.0307512	0.937404	-0.0445777	0.909337	-0.206148	0.594628	0.0583768	0.881413	-0.195265	0.614632	-0.352021	0.352855	0.109484	0.779177
CL5377.Contig5_DB	blue	-0.639191	0.0638247	0.965449	2.44051e-05	-0.680181	0.0437879	-0.788161	0.0116293	0.741239	0.0222876	0.590532	0.0940838	-0.73354	0.024493	-0.662964	0.0516218	-0.295385	0.4403	0.187487	0.629067	-0.312866	0.412362	0.616747	0.0768796	-0.301479	0.430468	-0.519151	0.152071	-0.466797	0.205243	-0.064195	0.869671	-0.527304	0.144606	0.0299991	0.938932	-0.360391	0.340709	-0.0671649	0.863686	-0.00268573	0.994529	-0.0503425	0.897659	-0.419611	0.260876	-0.130302	0.738278
CL2644.Contig2_DB	blue	0.493329	0.177164	-0.782321	0.0127123	0.831675	0.00544201	0.580277	0.101402	-0.500757	0.169721	-0.64066	0.0630229	0.28364	0.459524	0.236821	0.539535	0.33946	0.371468	-0.337332	0.374667	0.00938036	0.980892	-0.518142	0.153011	0.139621	0.720146	0.0792203	0.839455	-0.0272154	0.944591	0.137698	0.723879	0.432016	0.24555	-0.195695	0.613837	-0.0591019	0.879949	-0.162652	0.675866	0.140061	0.719294	0.273643	0.476164	0.213158	0.581866	-0.227349	0.556336
CL3320.Contig2_DB	blue	0.619668	0.0750938	-0.918286	0.000473754	0.74965	0.0200326	0.968954	1.68412e-05	-0.405649	0.278713	-0.3977	0.289143	0.679251	0.0441902	0.508691	0.161971	0.521691	0.149722	-0.424061	0.255321	0.581686	0.100376	-0.490043	0.180515	0.268763	0.484377	0.60948	0.0814345	0.440269	0.235629	0.178591	0.645708	0.593367	0.0921196	0.173802	0.654725	0.11777	0.762836	0.363187	0.336698	0.0102678	0.979084	0.118151	0.762088	0.385027	0.306181	-0.189473	0.62537
CL22351.Contig1_DB	blue	0.645324	0.0605194	-0.893344	0.00117374	0.707345	0.0330599	0.911739	0.000616391	-0.484711	0.18603	-0.469895	0.201844	0.671521	0.0476252	0.602068	0.0862492	0.614877	0.0780361	-0.375398	0.319457	0.507931	0.162704	-0.48075	0.190187	0.219615	0.570198	0.689916	0.0397188	0.41603	0.265391	0.16097	0.679073	0.52262	0.148869	0.202595	0.601134	0.228922	0.553533	0.279663	0.466114	-0.0111349	0.977318	0.0518509	0.894607	0.326361	0.391364	-0.0784567	0.840987
CL10025.Contig1_DB	blue	0.551835	0.123463	-0.888751	0.00135406	0.782788	0.0126232	0.82978	0.00564841	-0.378631	0.314967	-0.493425	0.177067	0.528103	0.143887	0.350178	0.355558	0.425872	0.25308	-0.484439	0.186313	0.289159	0.450447	-0.527072	0.144816	0.179144	0.644671	0.239162	0.535414	0.0734198	0.851101	0.0571145	0.883963	0.577808	0.103213	-0.146038	0.70773	-0.117717	0.762941	0.0949711	0.807975	-0.18936	0.625581	0.399293	0.287038	0.320953	0.399717	-0.240464	0.533126
CL19773.Contig2_DB	blue	-0.544686	0.129422	0.911213	0.000629008	-0.751564	0.0195414	-0.721923	0.0280853	0.586428	0.0969724	0.745662	0.021082	-0.414581	0.267231	-0.363792	0.335834	-0.399367	0.28694	0.318911	0.402893	-0.0862226	0.825433	0.640782	0.0629563	-0.142565	0.714444	-0.384976	0.30625	-0.185873	0.632076	-0.0141802	0.971117	-0.553067	0.122453	0.179839	0.643367	-0.121353	0.755796	0.0589946	0.880165	-0.130382	0.738121	-0.26272	0.494627	-0.294635	0.441518	0.175098	0.652282
Unigene32951_DB	blue	-0.594163	0.0915728	0.964323	2.72723e-05	-0.682564	0.042768	-0.828576	0.00578227	0.605319	0.0841167	0.695478	0.0375073	-0.552828	0.122649	-0.529061	0.143026	-0.40139	0.284277	0.384545	0.306839	-0.241849	0.530697	0.664052	0.0511021	-0.113024	0.772186	-0.535131	0.137646	-0.368817	0.328693	-0.0494544	0.899458	-0.602012	0.0862862	0.120513	0.757444	-0.16961	0.66265	-0.0519988	0.894307	-0.0153263	0.968784	-0.245399	0.52449	-0.312053	0.413642	0.074572	0.848785
CL19262.Contig1_DB	blue	0.579517	0.101958	-0.910757	0.0006401	0.748213	0.0204066	0.766767	0.0159218	-0.5949	0.091068	-0.380318	0.312637	0.760897	0.0172611	0.510443	0.160287	0.180707	0.641739	-0.172338	0.65749	0.365299	0.333685	-0.521766	0.149654	0.441851	0.233753	0.244718	0.525679	0.299675	0.433369	0.0536707	0.890925	0.519925	0.151354	-0.0668005	0.86442	0.184869	0.633951	0.127427	0.743895	-0.111015	0.776151	0.127045	0.744642	0.507763	0.162866	0.0315304	0.93582
CL8216.Contig1_DB	blue	-0.582016	0.100137	0.986397	9.53907e-07	-0.718791	0.0291096	-0.836347	0.00495528	0.61733	0.0765207	0.61489	0.0780278	-0.629404	0.0693307	-0.539993	0.133423	-0.317803	0.404621	0.321686	0.39858	-0.282883	0.460775	0.67118	0.0477808	-0.206657	0.593699	-0.48004	0.190938	-0.383804	0.307851	-0.0512261	0.895871	-0.623932	0.0725345	0.127836	0.743094	-0.189062	0.626136	-0.100184	0.797605	-0.000948708	0.998067	-0.226947	0.557054	-0.407866	0.275839	0.0572348	0.88372
CL2272.Contig3_DB	blue	-0.598304	0.0887596	0.936267	0.000202109	-0.794836	0.0104696	-0.887616	0.00140142	0.461041	0.211641	0.584575	0.0982942	-0.538858	0.134402	-0.379311	0.314028	-0.505552	0.165012	0.405638	0.278727	-0.350574	0.354977	0.560392	0.116551	-0.230463	0.550791	-0.486052	0.184634	-0.272807	0.477566	-0.0775282	0.84285	-0.596561	0.0899368	-0.00110662	0.997746	-0.0717699	0.854418	-0.169086	0.663642	-0.0760513	0.845814	-0.226209	0.558372	-0.346339	0.361219	0.258493	0.50185
CL17381.Contig1_DB	blue	0.519674	0.151586	-0.915822	0.000524383	0.749467	0.0200799	0.845248	0.00411193	-0.392093	0.29662	-0.530122	0.142078	0.541712	0.13195	0.307883	0.420242	0.426183	0.252695	-0.381444	0.311088	0.27221	0.47857	-0.575929	0.104606	0.240343	0.533339	0.354221	0.349643	0.125273	0.748109	-0.0593892	0.879368	0.629049	0.0695357	-0.149514	0.70103	-0.00498938	0.989836	0.150293	0.699529	-0.100998	0.79599	0.372386	0.323668	0.406389	0.277752	-0.278165	0.468606
CL13465.Contig1_DB	blue	-0.632452	0.0675853	0.964344	2.72178e-05	-0.825062	0.00618531	-0.928471	0.000300354	0.511649	0.159135	0.449884	0.22435	-0.67232	0.0472624	-0.576122	0.104462	-0.422652	0.257074	0.437571	0.238849	-0.501507	0.168979	0.561431	0.115728	-0.229732	0.552092	-0.493691	0.176797	-0.428286	0.250106	-0.267098	0.487192	-0.598466	0.0886503	-0.0764457	0.845023	-0.0947235	0.808468	-0.254295	0.509065	-0.0236686	0.951805	-0.145223	0.709305	-0.381389	0.311163	0.124758	0.749119
CL2101.Contig3_DB	blue	-0.654992	0.0555316	0.945113	0.000120861	-0.757342	0.0181075	-0.853453	0.00342691	0.575424	0.104982	0.506876	0.163725	-0.67216	0.0473351	-0.582737	0.0996158	-0.324194	0.394701	0.442347	0.233166	-0.394567	0.293309	0.550399	0.124647	-0.209079	0.58928	-0.33599	0.376691	-0.348347	0.358253	-0.193545	0.617816	-0.541571	0.13207	0.0511962	0.895932	-0.0485586	0.901272	-0.0845029	0.828873	0.134855	0.729405	-0.217044	0.574834	-0.317375	0.40529	0.00616117	0.987449
CL1864.Contig4_DB	blue	0.518443	0.15273	-0.956099	5.59122e-05	0.626787	0.0708518	0.749478	0.020077	-0.668215	0.0491448	-0.653231	0.0564202	0.612756	0.0793607	0.666634	0.0498828	0.368151	0.329636	-0.250046	0.516409	0.158066	0.684621	-0.730107	0.0255211	0.0871996	0.82348	0.590162	0.0943421	0.34521	0.362892	-0.00471267	0.9904	0.6075	0.0827037	-0.185403	0.632952	0.316808	0.406176	0.0529999	0.892282	-0.0775054	0.842895	0.228649	0.554019	0.402853	0.282359	0.0612051	0.875703
CL14019.Contig2_DB	blue	-0.609641	0.0813321	0.922594	0.000393652	-0.835237	0.0050681	-0.900463	0.000928314	0.468287	0.203604	0.484852	0.185883	-0.550862	0.124264	-0.37265	0.323297	-0.346552	0.360903	0.412139	0.270344	-0.489269	0.18131	0.522414	0.149058	-0.291109	0.447258	-0.43553	0.2413	-0.470041	0.201686	-0.268999	0.483978	-0.583697	0.098924	-0.104151	0.789734	-0.0483833	0.901626	-0.246037	0.523377	-0.267391	0.486695	-0.0994307	0.799103	-0.35357	0.350592	0.263354	0.493548
CL28807.Contig2_DB	blue	-0.598164	0.0888536	0.973597	9.59613e-06	-0.787529	0.0117434	-0.914372	0.000555858	0.487344	0.183295	0.527156	0.14474	-0.616544	0.0770042	-0.473867	0.197534	-0.401938	0.283558	0.439027	0.237109	-0.402601	0.28269	0.60248	0.0859767	-0.212999	0.582153	-0.454783	0.218719	-0.347053	0.360163	-0.130496	0.737899	-0.637185	0.06493	0.0431494	0.912233	-0.0517145	0.894883	-0.199014	0.607716	0.0109871	0.97762	-0.258468	0.501892	-0.384647	0.306699	0.186873	0.630211
CL17729.Contig1_DB	blue	0.629224	0.0694349	-0.920053	0.000439645	0.691765	0.0389744	0.822517	0.00648883	-0.653198	0.0564368	-0.410103	0.272956	0.840345	0.00456315	0.708587	0.0326151	0.433862	0.243313	-0.10637	0.785337	0.451197	0.222833	-0.517363	0.153738	0.408374	0.275183	0.621662	0.0738902	0.436425	0.240223	0.0607116	0.876699	0.495032	0.175441	0.143372	0.712882	0.443326	0.232011	0.238915	0.535847	-0.0638041	0.870459	-0.0564379	0.88533	0.504636	0.165905	0.130205	0.738467
Unigene1031_DB	blue	-0.577479	0.103457	0.9806	3.28558e-06	-0.77922	0.0133139	-0.889244	0.00133384	0.55048	0.12458	0.528596	0.143444	-0.635257	0.0660035	-0.466874	0.205158	-0.322537	0.397261	0.30685	0.421885	-0.405512	0.278891	0.627367	0.070513	-0.297694	0.436564	-0.513283	0.15758	-0.459749	0.213092	-0.119779	0.758888	-0.642089	0.0622492	0.00698122	0.985779	-0.182583	0.638224	-0.232319	0.547497	-0.15407	0.692274	-0.14513	0.709485	-0.458318	0.214705	0.16629	0.668947
CL20075.Contig1_DB	blue	-0.554397	0.121368	0.931814	0.000254867	-0.806392	0.00865085	-0.80956	0.0081926	0.546493	0.127899	0.603299	0.0854374	-0.455602	0.217785	-0.433234	0.244073	-0.28161	0.462882	0.434211	0.24289	-0.303575	0.427109	0.637961	0.0645011	-0.12066	0.757156	-0.399367	0.286939	-0.427465	0.251115	-0.27858	0.467915	-0.602051	0.0862603	0.0670566	0.863904	-0.0436605	0.911197	-0.103425	0.791174	-0.254606	0.50853	-0.192969	0.618881	-0.303117	0.427842	0.20177	0.602648
CL6192.Contig2_DB	blue	-0.612879	0.079284	0.941818	0.000147735	-0.747702	0.0205406	-0.821134	0.00665803	0.624001	0.0724936	0.625619	0.0715374	-0.54607	0.128255	-0.662542	0.0518243	-0.42499	0.25417	0.451314	0.222698	-0.318867	0.402962	0.639996	0.0633845	-0.0303686	0.938181	-0.555188	0.120726	-0.449024	0.225347	-0.294526	0.441694	-0.558514	0.118048	0.0104657	0.978681	-0.160118	0.680699	-0.0837717	0.830337	-0.0845619	0.828755	-0.147671	0.704581	-0.253136	0.511065	0.021	0.957235
CL738.Contig2_DB	blue	-0.606001	0.0836732	0.97383	9.30613e-06	-0.808242	0.00838114	-0.935003	0.000216215	0.488571	0.182028	0.478255	0.192832	-0.645116	0.0606294	-0.492409	0.178099	-0.390883	0.298246	0.417621	0.263381	-0.475684	0.195579	0.585152	0.0978816	-0.253969	0.509627	-0.492867	0.177634	-0.426047	0.252863	-0.191832	0.620989	-0.6354	0.0659237	-0.0332752	0.932275	-0.086086	0.825706	-0.263454	0.493377	-0.0643178	0.869424	-0.182992	0.637458	-0.410186	0.272849	0.188519	0.627145
CL20117.Contig1_DB	blue	0.481775	0.189106	-0.953402	6.87049e-05	0.715779	0.0301172	0.826721	0.00599276	-0.552987	0.122519	-0.502791	0.167713	0.607723	0.0825602	0.404682	0.279971	0.190451	0.623553	-0.168376	0.664988	0.361012	0.339817	-0.668438	0.0490413	0.343082	0.366055	0.540158	0.133282	0.533001	0.13952	0.0548272	0.888586	0.67065	0.0480227	-0.0438125	0.910889	0.274979	0.473925	0.275763	0.472614	0.286409	0.454959	0.10107	0.795847	0.545749	0.128525	-0.180743	0.641671
CL18803.Contig1_DB	blue	0.584468	0.0983706	-0.959018	4.40737e-05	0.712827	0.0311269	0.954366	6.39197e-05	-0.437018	0.239512	-0.405475	0.278939	0.72784	0.0262153	0.532375	0.140074	0.410374	0.272608	-0.401436	0.284216	0.512079	0.158724	-0.566655	0.111642	0.264321	0.491903	0.535673	0.137171	0.399462	0.286815	0.0787466	0.840405	0.649209	0.0584822	0.0161928	0.96702	0.105954	0.786161	0.322589	0.397181	-0.133115	0.732793	0.232486	0.5472	0.451246	0.222777	-0.136473	0.726258
CL4932.Contig3_DB	blue	-0.621822	0.0737945	0.98343	1.89721e-06	-0.756439	0.0183269	-0.920206	0.000436761	0.561712	0.115506	0.496599	0.173865	-0.697381	0.0367694	-0.561593	0.1156	-0.352507	0.352146	0.355354	0.347995	-0.473238	0.198213	0.600107	0.0875516	-0.274855	0.474133	-0.54345	0.130469	-0.499929	0.170541	-0.163392	0.674457	-0.621145	0.0742012	-0.0384428	0.921781	-0.183255	0.636966	-0.247138	0.521461	-0.0568249	0.884548	-0.127787	0.743191	-0.426434	0.252385	0.089946	0.817994
Unigene31912_DB	blue	-0.718594	0.0291749	0.926866	0.000324081	-0.692511	0.0386769	-0.879468	0.00177572	0.588252	0.0956823	0.529342	0.142774	-0.732392	0.0248337	-0.629884	0.069054	-0.475312	0.195978	0.406785	0.277239	-0.436714	0.239877	0.481248	0.189662	-0.248314	0.519416	-0.469609	0.202156	-0.34889	0.357453	-0.107636	0.782832	-0.483207	0.187603	-0.0564547	0.885296	-0.150716	0.698717	-0.0947062	0.808502	0.208396	0.590524	-0.141873	0.715783	-0.284575	0.457981	-0.0590643	0.880024
CL9245.Contig1_DB	blue	-0.573515	0.106411	0.933301	0.000236288	-0.70577	0.0336292	-0.729907	0.0255819	0.702408	0.034866	0.734596	0.0241824	-0.525104	0.146599	-0.576667	0.104057	-0.444372	0.23078	0.221785	0.566295	-0.146844	0.706174	0.669582	0.0485127	-0.14247	0.714627	-0.600265	0.0874461	-0.354497	0.349241	-0.0618661	0.874369	-0.535056	0.137712	0.0673403	0.863333	-0.34621	0.361409	-0.00149066	0.996963	-0.161958	0.67719	-0.0989983	0.799962	-0.334705	0.378635	0.00756902	0.984581
CL11850.Contig1_DB	blue	-0.636164	0.0654969	0.916941	0.000500951	-0.639836	0.0634716	-0.739508	0.0227713	0.67194	0.0474348	0.692671	0.0386129	-0.614949	0.0779914	-0.473475	0.197957	-0.34175	0.368041	0.234404	0.543803	-0.174332	0.653725	0.566483	0.111775	-0.283094	0.460426	-0.380512	0.31237	-0.253527	0.510389	0.100423	0.79713	-0.487205	0.183439	0.139865	0.719673	-0.227521	0.55603	0.0766032	0.844706	0.0887368	0.820409	-0.190422	0.623608	-0.324654	0.393991	-0.040321	0.91797
Unigene36715_DB	blue	0.688584	0.0402604	-0.791917	0.0109667	0.638411	0.064253	0.691299	0.039161	-0.576576	0.104125	-0.479884	0.191103	0.700257	0.0356724	0.36082	0.340093	0.306406	0.422591	-0.175752	0.65105	0.290765	0.447819	-0.312291	0.413267	0.508984	0.161689	0.122542	0.753462	0.109777	0.778598	-0.121202	0.756093	0.320919	0.399771	-0.0160744	0.967261	0.130004	0.73886	-0.0814847	0.834917	-0.25153	0.51384	0.106661	0.784762	0.308527	0.41922	0.0815508	0.834784
CL14612.Contig2_DB	blue	-0.597611	0.0892262	0.982394	2.34387e-06	-0.694074	0.038058	-0.830811	0.00553551	0.641219	0.0627196	0.603459	0.0853328	-0.678929	0.0443302	-0.548569	0.126165	-0.319635	0.401766	0.256167	0.505842	-0.293314	0.443665	0.647192	0.0595342	-0.273533	0.476348	-0.496067	0.1744	-0.387656	0.302605	0.00598833	0.987801	-0.601461	0.0866507	0.103508	0.791008	-0.251393	0.514077	-0.102423	0.79316	0.0245661	0.949979	-0.184317	0.634982	-0.436404	0.240249	0.0132964	0.972917
CL6946.Contig1_DB	blue	-0.638102	0.0644231	0.929407	0.000287088	-0.645992	0.0601657	-0.754479	0.018809	0.749253	0.0201353	0.65208	0.0570052	-0.606221	0.0835305	-0.642326	0.0621214	-0.208652	0.590058	0.297865	0.436287	-0.300971	0.431284	0.620955	0.0743155	-0.167921	0.66585	-0.492604	0.177901	-0.586905	0.0966341	-0.209349	0.588789	-0.503723	0.166799	0.0325397	0.933769	-0.277822	0.469177	-0.00523481	0.989336	-0.148808	0.702389	-0.0381489	0.922378	-0.282203	0.4619	-0.119635	0.75917
Unigene3882_DB	blue	0.661308	0.0524193	-0.855093	0.00330009	0.753542	0.0190425	0.785956	0.0120306	-0.633083	0.0672273	-0.267071	0.487237	0.85107	0.00361704	0.553066	0.122454	0.210296	0.587064	-0.0517056	0.894901	0.574727	0.105502	-0.370629	0.326137	0.621213	0.0741603	0.36888	0.328604	0.514917	0.156035	0.183107	0.637243	0.404828	0.279781	0.244282	0.526439	0.352679	0.351894	0.248686	0.518769	0.103762	0.790505	-0.195486	0.614225	0.512877	0.157966	0.100622	0.796736
CL9981.Contig1_DB	blue	0.679555	0.0440584	-0.844482	0.00418031	0.534711	0.138015	0.723703	0.0275139	-0.779599	0.0132394	-0.579514	0.101959	0.724403	0.0272912	0.674578	0.0462471	0.343944	0.364772	-0.0517322	0.894847	0.392235	0.296429	-0.468728	0.203121	0.371449	0.324984	0.697352	0.0367806	0.651761	0.0571681	0.0758036	0.846312	0.371815	0.32447	0.214858	0.578786	0.563379	0.114194	0.0903941	0.8171	0.188799	0.626624	-0.236855	0.539475	0.330982	0.38429	0.240185	0.533616
CL10963.Contig4_DB	blue	-0.650078	0.0580326	0.916424	0.000511676	-0.881878	0.00165857	-0.865237	0.00258655	0.512245	0.158567	0.420762	0.259434	-0.679565	0.044054	-0.574083	0.105984	-0.537291	0.13576	0.371975	0.324244	-0.442598	0.232869	0.479956	0.191026	-0.288206	0.452008	-0.413541	0.268555	-0.232006	0.548052	-0.240122	0.533725	-0.504864	0.165683	-0.112338	0.773539	-0.111131	0.775922	-0.187256	0.629498	0.0614111	0.875287	-0.111186	0.775814	-0.372483	0.323532	0.0939684	0.809972
CL3484.Contig2_DB	blue	-0.616713	0.0769	0.983929	1.70554e-06	-0.772673	0.014646	-0.921938	0.000405172	0.534823	0.137917	0.487347	0.183293	-0.698921	0.0361793	-0.550212	0.124801	-0.385585	0.30542	0.373711	0.321812	-0.45303	0.220725	0.595862	0.0904118	-0.269295	0.483478	-0.506571	0.164021	-0.417407	0.263651	-0.135132	0.728867	-0.625259	0.0717492	-0.00823603	0.983223	-0.144237	0.71121	-0.236381	0.540312	0.0190535	0.961196	-0.180397	0.64232	-0.430517	0.247376	0.107314	0.783468
CL19306.Contig1_DB	blue	0.659033	0.0535273	-0.875646	0.00197302	0.785795	0.0120602	0.837586	0.00483138	-0.524981	0.146711	-0.268508	0.484808	0.797561	0.0100196	0.637221	0.0649098	0.313622	0.411173	-0.357132	0.345414	0.544595	0.129498	-0.412784	0.26952	0.354452	0.349306	0.270028	0.482242	0.336131	0.376479	0.275738	0.472656	0.458292	0.214734	0.102465	0.793077	0.0772823	0.843343	0.197364	0.610757	-0.212718	0.582664	0.0823234	0.833236	0.385959	0.304911	0.0658453	0.866345
CL14330.Contig2_DB	blue	0.652348	0.056869	-0.834336	0.00516097	0.637953	0.0645053	0.855778	0.00324808	-0.491748	0.178772	-0.552509	0.12291	0.580725	0.101075	0.439658	0.236356	0.576535	0.104156	-0.29916	0.434197	0.459402	0.213481	-0.417897	0.263033	0.290464	0.448311	0.67999	0.0438705	0.449648	0.224624	0.0723135	0.853325	0.458092	0.21496	0.236498	0.540105	0.265216	0.490383	0.213153	0.581875	0.158377	0.684024	-0.025704	0.947665	0.26899	0.483993	-0.120603	0.757267
CL17283.Contig1_DB	blue	0.49206	0.178454	-0.896978	0.00104347	0.713204	0.0309966	0.802809	0.00918985	-0.452073	0.221824	-0.598591	0.0885662	0.495721	0.174747	0.256432	0.505387	0.434569	0.242459	-0.21041	0.586858	0.238431	0.536699	-0.590378	0.0941914	0.311819	0.414012	0.519051	0.152165	0.245483	0.524343	-0.111391	0.775409	0.612929	0.0792524	-0.061457	0.875194	0.194534	0.615985	0.179671	0.643681	0.175433	0.65165	0.205212	0.59634	0.448044	0.226486	-0.297454	0.436951
CL17240.Contig2_DB	blue	0.495467	0.175003	-0.901003	0.00091129	0.541192	0.132395	0.648901	0.0586421	-0.699067	0.0361237	-0.787193	0.0118044	0.491714	0.178807	0.436997	0.239536	0.264277	0.491978	-0.116746	0.764852	0.0142283	0.971019	-0.700498	0.0355814	0.183021	0.637404	0.517869	0.153266	0.326092	0.391776	-0.186802	0.630344	0.553762	0.121886	-0.246021	0.523405	0.359804	0.341555	-0.0781832	0.841536	0.101221	0.795548	0.195393	0.614395	0.371987	0.324228	0.00845405	0.982779
CL10524.Contig2_DB	blue	0.549616	0.125295	-0.83442	0.0051523	0.805246	0.00882094	0.84845	0.00383441	-0.310931	0.415414	-0.52951	0.142624	0.421921	0.257984	0.257138	0.504175	0.645112	0.0606318	-0.441186	0.234541	0.3342	0.379398	-0.460424	0.212333	0.193781	0.617377	0.461953	0.210619	0.115652	0.767005	0.0836261	0.830628	0.540867	0.132673	0.0669631	0.864093	-0.0184452	0.962434	0.194303	0.616411	0.0885723	0.820738	0.240749	0.532626	0.279662	0.466115	-0.38698	0.303523
CL2788.Contig2_DB	blue	0.699503	0.035958	-0.820936	0.00668245	0.781333	0.0129019	0.886694	0.00144072	-0.457843	0.215241	-0.316263	0.407028	0.74857	0.0203132	0.542792	0.131028	0.646135	0.0600902	-0.259533	0.500069	0.619672	0.0750916	-0.298457	0.435332	0.445792	0.229114	0.580988	0.100883	0.353177	0.351166	0.19918	0.60741	0.394358	0.293588	0.38762	0.302654	0.256736	0.504865	0.319821	0.401476	0.0176688	0.964015	-0.123345	0.751888	0.359917	0.341393	-0.064924	0.868202
Unigene31567_DB	blue	0.498161	0.172301	-0.904178	0.000815637	0.849415	0.00375334	0.922341	0.000398073	-0.298426	0.435382	-0.410627	0.272283	0.475754	0.195504	0.295745	0.439717	0.399928	0.2862	-0.496694	0.17377	0.474001	0.197389	-0.55925	0.11746	0.191853	0.620951	0.432352	0.245143	0.350081	0.355701	0.250821	0.515067	0.672783	0.0470534	0.032631	0.933584	-0.0821275	0.833629	0.347226	0.359906	0.200259	0.605425	0.258536	0.501777	0.388367	0.301643	-0.426385	0.252446
CL636.Contig2_DB	blue	0.593072	0.0923231	-0.853062	0.00345764	0.681248	0.0433296	0.857444	0.00312394	-0.382962	0.309005	-0.530997	0.141297	0.552455	0.122954	0.245919	0.523584	0.498875	0.171589	-0.330298	0.385333	0.370744	0.325975	-0.438357	0.237908	0.347816	0.359035	0.442957	0.232447	0.216096	0.576546	-0.0903699	0.817148	0.529289	0.142822	0.0369791	0.924753	0.0727762	0.852394	0.17512	0.652241	-0.00180147	0.99633	0.206766	0.5935	0.340257	0.370274	-0.26542	0.490037
CL15608.Contig1_DB	blue	-0.578376	0.102795	0.966324	2.23288e-05	-0.719991	0.0287144	-0.860925	0.00287528	0.555345	0.120599	0.625914	0.0713636	-0.532816	0.139684	-0.511602	0.15918	-0.314299	0.410108	0.469204	0.202599	-0.32462	0.394043	0.666297	0.0500405	-0.0851491	0.82758	-0.48222	0.188638	-0.451373	0.22263	-0.181529	0.640197	-0.636294	0.0654247	0.105894	0.786281	-0.0687543	0.860485	-0.11599	0.76634	-0.0799276	0.838037	-0.25836	0.502078	-0.305784	0.423581	0.131791	0.735373
CL3715.Contig5_DB	blue	-0.679506	0.0440797	0.959574	4.20407e-05	-0.7165	0.0298742	-0.886548	0.00144702	0.634792	0.066264	0.459303	0.213593	-0.779723	0.0132151	-0.670876	0.0479196	-0.312588	0.4128	0.332487	0.381998	-0.50423	0.166302	0.541001	0.132558	-0.302889	0.428207	-0.494558	0.175921	-0.529212	0.142891	-0.199651	0.606544	-0.537332	0.135725	-0.0753493	0.847224	-0.22349	0.563238	-0.18865	0.626902	0.0513938	0.895532	-0.0567318	0.884736	-0.389002	0.300783	-0.076045	0.845827
CL7445.Contig6_DB	blue	-0.666327	0.0500266	0.955032	6.07524e-05	-0.663886	0.0511813	-0.867079	0.00246951	0.666404	0.0499906	0.546106	0.128225	-0.710971	0.0317729	-0.653196	0.0564377	-0.290257	0.44865	0.328488	0.3881	-0.461677	0.210928	0.578195	0.102928	-0.244909	0.525345	-0.57101	0.108303	-0.617121	0.0766491	-0.1955	0.614198	-0.544544	0.129541	-0.0666302	0.864763	-0.266753	0.487776	-0.161239	0.67856	-0.0707219	0.856526	-0.0322354	0.934387	-0.346334	0.361225	-0.069743	0.858495
CL9829.Contig1_DB	blue	0.528115	0.143876	-0.950945	8.20439e-05	0.720269	0.0286233	0.92543	0.000346411	-0.409719	0.273449	-0.496809	0.173654	0.563912	0.113776	0.544785	0.129338	0.439966	0.23599	-0.541701	0.131959	0.414177	0.267745	-0.6506	0.0577635	0.0294859	0.939975	0.563848	0.113827	0.389503	0.300106	0.190843	0.622826	0.688071	0.0404703	-0.0633057	0.871465	0.0115198	0.976535	0.270904	0.480765	-0.0588956	0.880365	0.32926	0.386919	0.343857	0.364901	-0.204144	0.598295
CL15257.Contig1_DB	blue	0.525697	0.146061	-0.855287	0.00328528	0.816001	0.00731194	0.889385	0.00132809	-0.279143	0.466978	-0.430335	0.247599	0.45448	0.219065	0.14769	0.704545	0.38971	0.299827	-0.431483	0.246199	0.45434	0.219226	-0.464157	0.208163	0.31423	0.410217	0.349409	0.356688	0.287375	0.453372	0.135199	0.728737	0.603392	0.0853763	0.0568755	0.884446	-0.0908539	0.816182	0.290314	0.448556	0.221393	0.567001	0.225067	0.560414	0.364455	0.334887	-0.455893	0.217454
CL11534.Contig1_DB	blue	-0.612184	0.0797207	0.906638	0.000746517	-0.755858	0.0184689	-0.815154	0.00742389	0.497375	0.173087	0.595956	0.0903483	-0.567803	0.110756	-0.335706	0.377121	-0.450503	0.223635	0.328673	0.387816	-0.262016	0.495827	0.513052	0.1578	-0.311615	0.414335	-0.336714	0.3756	-0.141719	0.71608	0.0525746	0.893142	-0.530433	0.1418	0.0780694	0.841764	-0.0696668	0.858649	-0.0476376	0.903137	0.0626019	0.872884	-0.256083	0.505987	-0.347077	0.360128	0.179469	0.64406
CL25552.Contig2_DB	blue	0.561428	0.11573	-0.889492	0.00132375	0.622138	0.0736048	0.809585	0.00818898	-0.579111	0.102255	-0.647616	0.0593123	0.489228	0.181353	0.624282	0.0723269	0.473247	0.198203	-0.397714	0.289125	0.32718	0.390105	-0.632782	0.0673979	-0.00593303	0.987914	0.748443	0.0203463	0.553184	0.122357	0.22436	0.561678	0.5607	0.116306	0.0585498	0.881063	0.264321	0.491903	0.158401	0.683978	0.199562	0.606707	0.0809257	0.836037	0.236975	0.539263	-0.0521597	0.893982
Unigene33662_DB	blue	-0.6531	0.0564867	0.961768	3.46552e-05	-0.71427	0.0306307	-0.896219	0.0010698	0.586572	0.0968698	0.544521	0.129561	-0.676853	0.0452384	-0.670408	0.0481333	-0.437657	0.238746	0.441329	0.234371	-0.431382	0.246321	0.590571	0.0940563	-0.139477	0.720427	-0.566668	0.111632	-0.457503	0.215626	-0.203709	0.599092	-0.571978	0.107569	-0.0278919	0.943216	-0.1635	0.674251	-0.164076	0.673155	0.0696818	0.858619	-0.158226	0.684314	-0.313748	0.410974	-0.00318325	0.993515
CL11410.Contig1_DB	blue	-0.580567	0.101191	0.979647	3.88254e-06	-0.701328	0.0352695	-0.806834	0.008586	0.682154	0.0429428	0.628731	0.06972	-0.637896	0.0645367	-0.646197	0.0600576	-0.343887	0.364857	0.275151	0.473638	-0.273508	0.47639	0.691582	0.0390477	-0.165845	0.669792	-0.581007	0.10087	-0.454476	0.21907	-0.106925	0.784239	-0.599694	0.0878271	0.0786756	0.840548	-0.299709	0.433314	-0.100895	0.796193	-0.0579023	0.882372	-0.137856	0.723572	-0.400286	0.285729	-0.0245064	0.950101
CL13735.Contig1_DB	blue	0.504209	0.166323	-0.978938	4.37363e-06	0.653479	0.0562941	0.871417	0.00220849	-0.564525	0.113297	-0.523434	0.148123	0.629362	0.0693549	0.599305	0.0880877	0.242036	0.53037	-0.339069	0.372056	0.391399	0.297552	-0.723498	0.0275794	0.13093	0.737053	0.634592	0.0663762	0.599579	0.087904	0.150613	0.698916	0.69963	0.0359098	-0.0752152	0.847493	0.22984	0.551899	0.271689	0.479445	0.113366	0.771513	0.183232	0.637009	0.451382	0.22262	-0.0777134	0.842478
CL9760.Contig2_DB	blue	-0.549787	0.125153	0.972565	1.09644e-05	-0.771664	0.014859	-0.876818	0.00191102	0.504229	0.166303	0.570449	0.10873	-0.555355	0.120591	-0.39968	0.286526	-0.309285	0.418019	0.384019	0.307557	-0.342356	0.367138	0.648564	0.0588172	-0.22038	0.568821	-0.446536	0.228244	-0.390576	0.29866	-0.101952	0.794096	-0.66391	0.05117	0.0947991	0.808317	-0.0761526	0.845611	-0.18339	0.636713	-0.123938	0.750726	-0.254063	0.509464	-0.410487	0.272462	0.229445	0.552602
Unigene25960_DB	blue	0.56808	0.110543	-0.827838	0.00586538	0.611282	0.0802895	0.722445	0.0279169	-0.491473	0.179053	-0.622195	0.0735705	0.407169	0.276741	0.280022	0.465517	0.116913	0.764522	-0.49651	0.173954	0.229807	0.551958	-0.519142	0.152081	0.118621	0.761163	0.141396	0.716707	0.327921	0.388968	0.109088	0.77996	0.502888	0.167619	-0.207583	0.592007	-0.132899	0.733214	-0.0788133	0.840272	0.0136898	0.972116	0.326344	0.391389	0.157941	0.684859	-0.130487	0.737916
Unigene34323_DB	blue	-0.59853	0.0886075	0.990296	2.93656e-07	-0.757663	0.0180299	-0.909282	0.000676908	0.553007	0.122502	0.507078	0.163529	-0.684381	0.0420009	-0.570108	0.108989	-0.357713	0.344574	0.37234	0.323733	-0.426863	0.251857	0.630616	0.0686333	-0.232856	0.546544	-0.522408	0.149063	-0.442603	0.232864	-0.141604	0.716304	-0.640914	0.0628848	0.0224813	0.954221	-0.157936	0.684869	-0.226545	0.557773	0.00211536	0.995691	-0.190578	0.623318	-0.431207	0.246535	0.0937794	0.810349
CL3145.Contig1_DB	blue	0.661337	0.0524052	-0.848068	0.00386678	0.585663	0.0975165	0.776604	0.013836	-0.632402	0.0676138	-0.422975	0.256671	0.772885	0.0146016	0.411695	0.270913	0.118261	0.76187	-0.0807324	0.836424	0.488865	0.181726	-0.393306	0.294995	0.586203	0.097132	0.368403	0.329279	0.563679	0.113959	-0.0135109	0.97248	0.424258	0.255077	0.121108	0.756277	0.316531	0.406609	0.148429	0.703119	0.09592	0.806085	-0.0951491	0.80762	0.434442	0.242611	0.0790111	0.839875
CL18200.Contig3_DB	blue	0.467633	0.204323	-0.869968	0.00229349	0.836686	0.00492121	0.773356	0.014503	-0.41322	0.268964	-0.509073	0.161603	0.353415	0.350818	0.400129	0.285935	0.286408	0.454962	-0.549297	0.12556	0.284256	0.458507	-0.626298	0.071138	-0.0136461	0.972205	0.298976	0.434494	0.315571	0.408112	0.388846	0.300994	0.61263	0.0794402	-0.112122	0.773967	-0.12568	0.747313	0.130197	0.738483	0.202389	0.601513	0.299334	0.433918	0.257333	0.503839	-0.291466	0.446674
CL20287.Contig2_DB	blue	-0.538079	0.135076	0.962819	3.14674e-05	-0.734008	0.0243549	-0.79466	0.0104992	0.621855	0.0737746	0.68274	0.0426936	-0.506095	0.164484	-0.53469	0.138033	-0.373935	0.321499	0.326219	0.391581	-0.216941	0.575019	0.711283	0.0316637	-0.0994002	0.799163	-0.573788	0.106205	-0.412688	0.269643	-0.128879	0.741056	-0.623668	0.0726914	0.102996	0.792024	-0.225792	0.559118	-0.0906811	0.816527	-0.184652	0.634354	-0.185145	0.633435	-0.358143	0.343951	0.111634	0.77493
CL25678.Contig2_DB	blue	0.459156	0.21376	-0.967196	2.03863e-05	0.803231	0.0091252	0.881318	0.0016853	-0.423612	0.25588	-0.405328	0.27913	0.632363	0.0676361	0.393105	0.295264	0.29998	0.432878	-0.276275	0.471758	0.383688	0.30801	-0.656876	0.0545916	0.31358	0.411238	0.450764	0.223333	0.324664	0.393977	0.0502136	0.89792	0.717934	0.0293941	-0.0924978	0.812903	0.116584	0.76517	0.331954	0.382809	0.06644	0.865146	0.262419	0.495141	0.579601	0.101896	-0.275213	0.473533
CL8216.Contig5_DB	blue	-0.60262	0.0858846	0.968156	1.83907e-05	-0.728188	0.0261081	-0.910244	0.000652743	0.519545	0.151706	0.573002	0.106796	-0.580931	0.100925	-0.520967	0.15039	-0.363931	0.335636	0.482931	0.187892	-0.411077	0.271705	0.627328	0.0705358	-0.125831	0.747017	-0.522949	0.148567	-0.473317	0.198128	-0.191227	0.622112	-0.636623	0.0652417	0.0327592	0.933323	-0.0695099	0.858965	-0.186353	0.631179	-0.0552967	0.887637	-0.230648	0.550463	-0.320598	0.400269	0.146263	0.707297
CL26809.Contig2_DB	blue	0.530022	0.142166	-0.969863	1.51906e-05	0.739657	0.0227296	0.887282	0.00141556	-0.503964	0.166562	-0.352947	0.351502	0.777829	0.0135899	0.51848	0.152696	0.247126	0.521482	-0.230441	0.55083	0.461549	0.211071	-0.606079	0.0836223	0.389186	0.300534	0.446571	0.228203	0.404209	0.280588	0.0390812	0.920486	0.660398	0.0528607	-0.0447668	0.908954	0.194786	0.615518	0.318959	0.402818	-0.0714269	0.855108	0.183895	0.635769	0.587215	0.0964145	-0.0925935	0.812713
Unigene38825_DB	blue	-0.608244	0.0822257	0.975304	7.60725e-06	-0.694538	0.0378752	-0.903242	0.000843058	0.548552	0.126179	0.580037	0.101577	-0.62731	0.070546	-0.511531	0.159247	-0.34152	0.368385	0.408176	0.275439	-0.398565	0.287999	0.624826	0.0720047	-0.196156	0.612987	-0.530258	0.141956	-0.47237	0.199152	-0.0987101	0.800535	-0.632163	0.0677493	0.0456207	0.907223	-0.131308	0.736316	-0.178443	0.645988	-0.0259445	0.947176	-0.213976	0.580383	-0.363898	0.335683	0.11012	0.777921
CL2552.Contig7_DB	blue	-0.552717	0.12274	0.962793	3.15432e-05	-0.768971	0.0154374	-0.764997	0.0163181	0.668771	0.0488872	0.604059	0.0849387	-0.607574	0.0826565	-0.609237	0.0815896	-0.356605	0.346178	0.238287	0.536951	-0.223709	0.562844	0.68229	0.0428848	-0.190537	0.623393	-0.505077	0.165475	-0.349977	0.355853	-0.12266	0.75323	-0.583144	0.0993224	0.0930271	0.811848	-0.280993	0.463904	-0.0803138	0.837263	-0.0801404	0.83761	-0.140643	0.718165	-0.425285	0.253805	0.0125283	0.974481
CL2511.Contig3_DB	blue	0.526729	0.145126	-0.869924	0.00229609	0.72401	0.027416	0.808529	0.00833993	-0.512486	0.158337	-0.582665	0.0996678	0.44802	0.226513	0.520356	0.150955	0.505168	0.165386	-0.353219	0.351105	0.352499	0.352156	-0.59948	0.0879701	0.0734363	0.851067	0.716247	0.0299592	0.499464	0.171003	0.268419	0.484957	0.564229	0.113528	0.124389	0.749841	0.243647	0.52755	0.230113	0.551413	0.340867	0.369361	0.0354698	0.927817	0.292516	0.444963	-0.183293	0.636895
Unigene772_DB	blue	0.462355	0.21017	-0.943423	0.000134163	0.68904	0.0400744	0.836724	0.00491739	-0.42824	0.250163	-0.622047	0.0736594	0.440601	0.235235	0.423725	0.255739	0.357671	0.344634	-0.511152	0.159609	0.214307	0.579784	-0.721305	0.0282854	-0.0224284	0.954328	0.461398	0.211241	0.278863	0.467444	0.069721	0.85854	0.707946	0.0328443	-0.247262	0.521245	-0.0280633	0.942867	0.131325	0.736282	-0.0291077	0.940744	0.445664	0.229263	0.327364	0.389822	-0.251923	0.513159
CL2084.Contig3_DB	blue	0.42158	0.25841	-0.930595	0.000270853	0.833173	0.00528259	0.837017	0.00488803	-0.397792	0.289022	-0.497024	0.173439	0.445529	0.229422	0.350808	0.354634	0.355739	0.347435	-0.369918	0.327138	0.302697	0.428514	-0.686084	0.0412899	0.143436	0.712759	0.48257	0.18827	0.323653	0.395536	0.177598	0.647575	0.709939	0.0321359	-0.0913245	0.815243	0.053457	0.891357	0.28101	0.463877	0.250602	0.515447	0.271582	0.479625	0.45929	0.213608	-0.370009	0.32701
CL15854.Contig3_DB	blue	-0.581764	0.10032	0.986464	9.37724e-07	-0.714154	0.0306704	-0.82719	0.00593902	0.643951	0.0612495	0.583838	0.0988225	-0.668172	0.0491652	-0.61595	0.077371	-0.314884	0.40919	0.302069	0.429521	-0.296673	0.438213	0.676193	0.0455293	-0.198273	0.609081	-0.501727	0.168761	-0.40525	0.279232	-0.0825271	0.832829	-0.614385	0.0783424	0.112317	0.773582	-0.230178	0.551298	-0.111856	0.774491	0.0310315	0.936834	-0.196956	0.61151	-0.422416	0.257368	-0.00463702	0.990554
CL11679.Contig3_DB	blue	0.68765	0.0406429	-0.753211	0.0191252	0.465247	0.206955	0.675809	0.0456992	-0.593441	0.0920686	-0.789863	0.0113259	0.432502	0.244961	0.420532	0.259721	0.52433	0.147305	-0.375252	0.319661	0.159695	0.681508	-0.396757	0.290395	0.100928	0.796129	0.471777	0.199796	0.25543	0.50711	-0.0682322	0.861537	0.315494	0.408233	0.00120717	0.997541	0.166855	0.667874	-0.185703	0.632393	-0.0728548	0.852236	0.127817	0.743133	0.0107567	0.978089	0.0591434	0.879865
CL11753.Contig1_DB	blue	0.495909	0.174559	-0.857756	0.00310111	0.670069	0.0482892	0.72022	0.0286392	-0.444185	0.230999	-0.652403	0.0568407	0.424579	0.254679	0.199893	0.606099	0.340749	0.369537	-0.317488	0.405113	0.0981547	0.801639	-0.567917	0.110668	0.221821	0.566232	0.25332	0.510746	0.0630336	0.872013	-0.159344	0.682176	0.560791	0.116235	-0.250979	0.514794	0.00145728	0.997031	-0.0275486	0.943914	-0.0432343	0.912061	0.384599	0.306764	0.32813	0.388648	-0.249301	0.517703
CL19888.Contig3_DB	blue	-0.61832	0.0759148	0.979537	3.95609e-06	-0.715424	0.0302378	-0.849248	0.00376728	0.658599	0.0537403	0.500297	0.170176	-0.759626	0.0175607	-0.609212	0.0816056	-0.2632	0.49381	0.221583	0.566658	-0.407112	0.276815	0.609136	0.0816545	-0.347413	0.35963	-0.498231	0.172231	-0.492116	0.178397	-0.0876665	0.822547	-0.582468	0.0998105	0.00972467	0.980191	-0.291163	0.44717	-0.177643	0.64749	-0.0108966	0.977804	-0.0805384	0.836813	-0.478256	0.192831	-0.0394895	0.919657
CL22401.Contig1_DB	blue	-0.549409	0.125467	0.987015	8.11153e-07	-0.761684	0.0170774	-0.856705	0.00317859	0.578638	0.102602	0.572349	0.107289	-0.592604	0.0926456	-0.547825	0.126785	-0.311406	0.414664	0.364731	0.334494	-0.331422	0.383619	0.693382	0.038331	-0.158339	0.684098	-0.516776	0.154288	-0.448173	0.226336	-0.166997	0.667604	-0.658976	0.0535552	0.0888465	0.82019	-0.160988	0.679039	-0.176263	0.650088	-0.106237	0.7856	-0.209509	0.588497	-0.414311	0.267574	0.119915	0.758619
CL311.Contig1_DB	blue	0.547146	0.127352	-0.952322	7.43602e-05	0.751251	0.0196213	0.946363	0.000111631	-0.383076	0.308848	-0.379122	0.314289	0.685203	0.0416568	0.498573	0.17189	0.406528	0.277572	-0.450652	0.223462	0.485751	0.184947	-0.579527	0.10195	0.220813	0.568042	0.466071	0.206044	0.32179	0.398419	0.106275	0.785525	0.672059	0.0473807	-0.034333	0.930126	0.0176368	0.96408	0.323604	0.395612	-0.161939	0.677225	0.307786	0.420396	0.450871	0.22321	-0.196738	0.611911
CL3484.Contig1_DB	blue	-0.622973	0.0731054	0.969883	1.51571e-05	-0.723292	0.0276451	-0.926246	0.000333596	0.541979	0.131721	0.504577	0.165963	-0.677527	0.0449419	-0.510342	0.160385	-0.326596	0.391002	0.362209	0.338099	-0.491439	0.179087	0.581941	0.100191	-0.287201	0.453657	-0.547318	0.127209	-0.53935	0.133978	-0.144803	0.710115	-0.619061	0.075463	-0.0503745	0.897595	-0.169381	0.663083	-0.255094	0.507688	-0.0951692	0.80758	-0.120841	0.756801	-0.408414	0.275131	0.114955	0.76838
Unigene2154_DB	blue	0.573742	0.10624	-0.897387	0.00102945	0.653659	0.0562032	0.693946	0.0381083	-0.72909	0.0258312	-0.452064	0.221835	0.813322	0.00766997	0.592321	0.0928414	0.22864	0.554035	0.0666541	0.864715	0.287766	0.45273	-0.540319	0.133143	0.518822	0.152377	0.441357	0.234338	0.365929	0.332789	-0.0860671	0.825744	0.467533	0.204433	-0.00809399	0.983512	0.487512	0.183122	0.104652	0.788741	-0.0260563	0.946949	-0.0452542	0.907966	0.570275	0.108863	0.173118	0.656017
CL12940.Contig1_DB	blue	0.496733	0.17373	-0.923328	0.000381008	0.765916	0.0161114	0.853653	0.00341124	-0.457338	0.215813	-0.377439	0.31662	0.652896	0.0565899	0.301532	0.430383	0.185285	0.633174	-0.170095	0.661732	0.450215	0.223968	-0.563284	0.114268	0.475906	0.195341	0.406344	0.277811	0.443225	0.23213	0.0402585	0.918097	0.64394	0.0612552	0.00679503	0.986158	0.1765	0.64964	0.330962	0.38432	0.217371	0.574244	0.108544	0.781036	0.581821	0.100279	-0.249593	0.517196
CL12809.Contig3_DB	blue	-0.605774	0.0838202	0.970341	1.43719e-05	-0.701372	0.0352527	-0.84664	0.00398961	0.639994	0.0633858	0.537044	0.135975	-0.672279	0.0472812	-0.577367	0.10354	-0.198222	0.609176	0.319933	0.401303	-0.40264	0.282638	0.630969	0.0684311	-0.249391	0.517545	-0.471441	0.20016	-0.561323	0.115813	-0.173829	0.654675	-0.598523	0.0886125	0.0394155	0.919807	-0.202529	0.601255	-0.154353	0.691731	-0.0913038	0.815285	-0.116559	0.76522	-0.40183	0.2837	0.00210764	0.995706
Unigene5070_DB	blue	-0.627472	0.0704516	0.880843	0.00170822	-0.856085	0.00322497	-0.855465	0.00327175	0.484851	0.185884	0.40136	0.284316	-0.620859	0.0743738	-0.311503	0.414511	-0.314942	0.409099	0.252028	0.512979	-0.515804	0.155199	0.422461	0.257311	-0.493616	0.176874	-0.35176	0.353238	-0.420461	0.25981	-0.207288	0.592546	-0.504056	0.166473	-0.180875	0.641423	-0.123843	0.750912	-0.249603	0.517178	-0.286549	0.45473	0.0197047	0.959871	-0.424817	0.254384	0.229102	0.553212
Unigene34506_DB	blue	0.581296	0.10066	-0.832954	0.00530568	0.735838	0.0238205	0.823067	0.0064224	-0.50799	0.162647	-0.490902	0.179636	0.493885	0.176601	0.524098	0.147516	0.464109	0.208217	-0.353449	0.35077	0.487003	0.183648	-0.495851	0.174616	0.159651	0.681591	0.68064	0.0435903	0.599945	0.0876596	0.378127	0.315666	0.496206	0.17426	0.263331	0.493587	0.236403	0.540272	0.274774	0.474268	0.401476	0.284164	-0.0916908	0.814513	0.265292	0.490253	-0.149596	0.700872
CL18806.Contig2_DB	blue	0.613138	0.0791214	-0.835891	0.00500148	0.800631	0.00952838	0.734899	0.0240937	-0.532263	0.140173	-0.334821	0.378458	0.757345	0.0181069	0.513869	0.157025	0.445604	0.229334	-0.149541	0.700977	0.350326	0.355341	-0.388723	0.301161	0.471424	0.200178	0.25025	0.516056	0.0646613	0.868731	0.0304491	0.938018	0.404441	0.280286	0.055429	0.88737	0.195775	0.61369	0.107344	0.783409	-0.228363	0.554528	0.0790604	0.839776	0.457084	0.216101	0.0259737	0.947116
CL8216.Contig2_DB	blue	-0.632133	0.0677664	0.97107	1.31819e-05	-0.676965	0.0451889	-0.90436	0.00081037	0.568904	0.10991	0.544522	0.12956	-0.693448	0.038305	-0.524386	0.147253	-0.32474	0.393859	0.351535	0.353568	-0.433604	0.243625	0.588112	0.0957805	-0.277516	0.469688	-0.521601	0.149806	-0.484543	0.186205	-0.0604494	0.877228	-0.605536	0.0839752	0.0128446	0.973837	-0.177037	0.648631	-0.188274	0.627601	0.013312	0.972885	-0.167437	0.666769	-0.39458	0.293292	0.0589954	0.880164
CL12747.Contig1_DB	blue	-0.700689	0.0355096	0.935969	0.000205375	-0.709616	0.0322498	-0.904593	0.000803671	0.595047	0.0909674	0.478354	0.192726	-0.725139	0.0270585	-0.706359	0.0334156	-0.40942	0.273834	0.452	0.221909	-0.526901	0.144971	0.516296	0.154738	-0.185117	0.633486	-0.539843	0.133553	-0.528247	0.143757	-0.284564	0.457998	-0.516052	0.154967	-0.119968	0.758515	-0.159584	0.681718	-0.182782	0.637851	0.0711069	0.855751	-0.0738718	0.850192	-0.283266	0.460142	-0.0618599	0.874381
CL13648.Contig3_DB	blue	-0.626156	0.0712214	0.971517	1.24883e-05	-0.715718	0.0301379	-0.877526	0.0018742	0.594748	0.091172	0.501977	0.168516	-0.70025	0.0356751	-0.594345	0.091448	-0.25544	0.507093	0.388162	0.30192	-0.431318	0.2464	0.602657	0.0858603	-0.232368	0.54741	-0.434658	0.242351	-0.485581	0.185123	-0.172514	0.657157	-0.596482	0.0899905	0.0437154	0.911085	-0.13029	0.738302	-0.160559	0.679858	0.0444781	0.909539	-0.178021	0.64678	-0.383388	0.30842	0.00633763	0.98709
CL18.Contig7_DB	blue	-0.689634	0.0398329	0.941682	0.000148927	-0.648871	0.0586579	-0.87158	0.00219909	0.668034	0.0492291	0.525594	0.146154	-0.737625	0.0233057	-0.67463	0.0462239	-0.308754	0.41886	0.327002	0.390378	-0.495153	0.175319	0.542193	0.131538	-0.262708	0.494647	-0.58026	0.101414	-0.629153	0.069476	-0.201913	0.602387	-0.516147	0.154878	-0.108334	0.781452	-0.279209	0.466868	-0.166671	0.668222	-0.0425449	0.913459	4.34541e-05	0.999911	-0.331104	0.384103	-0.102272	0.79346
CL18584.Contig4_DB	blue	-0.596469	0.0899991	0.912405	0.000600672	-0.703353	0.0345155	-0.745017	0.0212549	0.660704	0.052712	0.636481	0.065321	-0.504523	0.166016	-0.560958	0.116102	-0.185304	0.633138	0.421192	0.258896	-0.265244	0.490335	0.628648	0.0697678	-0.0776926	0.84252	-0.358368	0.343626	-0.488441	0.182163	-0.283476	0.459795	-0.529235	0.14287	0.109009	0.780115	-0.0944647	0.808983	0.0187073	0.961901	-0.137034	0.725168	-0.161284	0.678474	-0.232725	0.546777	-0.00827476	0.983144
CL23861.Contig3_DB	blue	-0.756997	0.0181912	0.870385	0.0022688	-0.713721	0.0308189	-0.790507	0.0112124	0.666195	0.0500888	0.404495	0.280215	-0.820866	0.00669115	-0.625015	0.071893	-0.281174	0.463605	0.267968	0.48572	-0.484696	0.186045	0.364638	0.334626	-0.444929	0.230126	-0.253078	0.511164	-0.376989	0.317244	-0.170543	0.660883	-0.359513	0.341974	-0.115595	0.767118	-0.183674	0.636183	-0.0381042	0.922469	0.187402	0.629224	0.0142087	0.971059	-0.318502	0.403531	-0.195836	0.613577
CL11811.Contig4_DB	blue	0.571314	0.108073	-0.936389	0.000200781	0.647577	0.0593328	0.8759	0.00195949	-0.568944	0.10988	-0.450522	0.223612	0.667666	0.0494001	0.694205	0.0380063	0.252999	0.5113	-0.418137	0.262729	0.497499	0.172963	-0.62893	0.0696048	0.105518	0.787025	0.601122	0.0868759	0.657895	0.0540867	0.300904	0.431392	0.614563	0.0782314	0.0344785	0.929831	0.187128	0.629735	0.266755	0.487772	0.0551813	0.887871	0.106263	0.785549	0.356279	0.346651	0.0180851	0.963167
CL3265.Contig1_DB	blue	0.596748	0.0898102	-0.913161	0.00058317	0.806591	0.00862154	0.897546	0.00102404	-0.480464	0.190489	-0.246088	0.523289	0.814379	0.00752728	0.628908	0.0696176	0.407743	0.275999	-0.274597	0.474564	0.584871	0.098082	-0.47896	0.192083	0.386917	0.303608	0.482396	0.188453	0.392311	0.296327	0.222863	0.564361	0.552718	0.122739	0.162675	0.675822	0.200396	0.605174	0.366794	0.331559	-0.0873796	0.823121	0.0437886	0.910937	0.513575	0.157304	-0.0399848	0.918652
CL9313.Contig3_DB	blue	0.580595	0.10117	-0.788043	0.0116505	0.670113	0.0482687	0.565766	0.112331	-0.796058	0.0102661	-0.623333	0.0728906	0.50643	0.164158	0.747896	0.0204896	0.395931	0.291492	-0.126696	0.745324	0.176477	0.649685	-0.541833	0.131846	0.107481	0.783139	0.588865	0.0952507	0.469831	0.201915	0.324768	0.393815	0.331103	0.384104	0.124002	0.750599	0.475215	0.196082	-0.051592	0.895131	0.291181	0.44714	-0.188108	0.62791	0.223792	0.562696	0.217464	0.574076
CL18053.Contig1_DB	blue	-0.581529	0.100491	0.994635	3.70559e-08	-0.724754	0.0271801	-0.879101	0.00179403	0.587981	0.0958728	0.540443	0.133037	-0.681856	0.0430696	-0.571487	0.107942	-0.312713	0.412603	0.330906	0.384405	-0.371659	0.324689	0.66115	0.0524954	-0.231108	0.549646	-0.515728	0.155272	-0.441836	0.233771	-0.0891587	0.819566	-0.646071	0.0601243	0.0774146	0.843078	-0.192327	0.620072	-0.188242	0.627661	0.00957221	0.980501	-0.203951	0.598648	-0.445751	0.229162	0.0611052	0.875904
Unigene39171_DB	blue	-0.663591	0.0513221	0.933844	0.000229747	-0.769364	0.0153519	-0.959326	4.29378e-05	0.465741	0.206408	0.438335	0.237935	-0.691114	0.0392353	-0.475711	0.195551	-0.457309	0.215847	0.395733	0.291755	-0.57108	0.10825	0.476809	0.194374	-0.338333	0.373162	-0.538656	0.134577	-0.460933	0.211762	-0.170741	0.66051	-0.567508	0.110983	-0.166202	0.669114	-0.122515	0.753515	-0.300151	0.432603	-0.0560617	0.886091	-0.0858915	0.826095	-0.37865	0.314942	0.16545	0.670543
CL3756.Contig1_DB	blue	0.714264	0.0306328	-0.798263	0.00990577	0.619681	0.075086	0.825986	0.00607755	-0.551432	0.123795	-0.464051	0.208281	0.71671	0.0298035	0.570068	0.109021	0.636558	0.0652781	-0.201031	0.604005	0.51502	0.155938	-0.318416	0.403665	0.390217	0.299143	0.684274	0.0420459	0.419532	0.260975	0.0678631	0.86228	0.349395	0.35671	0.346152	0.361496	0.380175	0.312836	0.204057	0.598454	0.0166481	0.966093	-0.153527	0.693317	0.282962	0.460643	0.0537877	0.890688
CL584.Contig1_DB	blue	0.665753	0.0502967	-0.792838	0.0108083	0.583344	0.099178	0.617934	0.0761506	-0.720056	0.0286929	-0.455865	0.217486	0.768295	0.0155848	0.452521	0.22131	0.106472	0.785135	0.00201797	0.995889	0.287348	0.453415	-0.353392	0.350852	0.587594	0.096146	0.150783	0.698587	0.303319	0.427519	-0.0912973	0.815298	0.299838	0.433106	-0.00529848	0.989206	0.317425	0.405211	-0.084484	0.828911	-0.115056	0.76818	-0.0532385	0.891799	0.3898	0.299705	0.239136	0.535459
CL10269.Contig2_DB	blue	0.533958	0.138676	-0.795736	0.0103195	0.884727	0.00152714	0.818762	0.00695504	-0.274276	0.475102	-0.3757	0.319036	0.465975	0.20615	0.119464	0.759506	0.502578	0.167923	-0.314345	0.410036	0.41118	0.271574	-0.364726	0.334502	0.424385	0.25492	0.280593	0.464569	0.102033	0.793934	0.105135	0.787783	0.500803	0.169674	0.131707	0.735537	-0.0394418	0.919754	0.253122	0.511089	0.195924	0.613415	0.141975	0.715585	0.385771	0.305166	-0.442865	0.232555
CL19829.Contig2_DB	blue	0.643204	0.0616495	-0.867093	0.00246863	0.681933	0.0430368	0.826729	0.00599182	-0.559222	0.117482	-0.342855	0.366393	0.853042	0.0034592	0.502565	0.167936	0.419825	0.260608	-0.0397089	0.919212	0.500856	0.169622	-0.387461	0.302869	0.601964	0.0863181	0.505781	0.164789	0.348751	0.357656	-0.0733825	0.851176	0.447504	0.227114	0.193845	0.617259	0.389225	0.300481	0.263637	0.493067	-0.0706769	0.856616	-0.0734676	0.851005	0.534964	0.137792	0.0351968	0.928372
CL27579.Contig1_DB	blue	0.443604	0.231683	-0.969799	1.53034e-05	0.699162	0.0360875	0.839872	0.0046084	-0.480584	0.190362	-0.579725	0.101806	0.528515	0.143517	0.534442	0.13825	0.39506	0.292651	-0.394574	0.293299	0.233194	0.545945	-0.760287	0.0174044	0.0240714	0.950986	0.585592	0.0975672	0.320497	0.400425	0.0559506	0.886315	0.727076	0.026452	-0.200383	0.605196	0.131171	0.736582	0.206265	0.594415	-0.0187599	0.961794	0.362829	0.337212	0.431922	0.245665	-0.185942	0.631947
CL5974.Contig1_DB	blue	-0.671809	0.0474944	0.952487	7.34748e-05	-0.652224	0.0569319	-0.8882	0.00137693	0.595245	0.0908323	0.526397	0.145426	-0.739125	0.0228795	-0.562371	0.114986	-0.321536	0.398813	0.344043	0.364625	-0.446863	0.227862	0.53789	0.13524	-0.305592	0.423888	-0.477291	0.19386	-0.465722	0.20643	-0.0521878	0.893925	-0.550749	0.124357	-0.00481392	0.990193	-0.182406	0.638554	-0.145635	0.708509	0.104136	0.789763	-0.143607	0.712427	-0.366403	0.332115	-0.0230935	0.952975
Unigene33093_DB	blue	-0.671649	0.047567	0.833614	0.00523623	-0.807339	0.00851208	-0.766685	0.0159399	0.637868	0.0645526	0.528839	0.143226	-0.542676	0.131127	-0.616156	0.0772437	-0.50133	0.169154	0.301318	0.430727	-0.438658	0.237548	0.445827	0.229073	-0.215882	0.576932	-0.588972	0.0951758	-0.522136	0.149313	-0.430151	0.247823	-0.385852	0.305057	-0.298419	0.435394	-0.292366	0.445208	-0.134472	0.730151	-0.359283	0.342306	0.181974	0.639364	-0.223083	0.563967	0.010347	0.978923
CL6445.Contig1_DB	blue	-0.639292	0.0637691	0.939459	0.000169385	-0.773462	0.014481	-0.959758	4.13806e-05	0.43605	0.240674	0.453791	0.219853	-0.644225	0.0611031	-0.426186	0.252692	-0.408351	0.275213	0.448814	0.225591	-0.544576	0.129514	0.504063	0.166466	-0.296447	0.438579	-0.481926	0.188948	-0.444834	0.230237	-0.17583	0.650903	-0.599758	0.0877844	-0.0998879	0.798194	-0.0427853	0.912971	-0.283933	0.45904	-0.0586742	0.880812	-0.160087	0.680759	-0.364776	0.33443	0.216703	0.57545
CL5755.Contig2_DB	blue	0.66073	0.0526991	-0.81666	0.00722563	0.735907	0.0238004	0.748465	0.0203406	-0.531567	0.140791	-0.281006	0.463884	0.784607	0.0122806	0.471962	0.199595	0.215834	0.57702	-0.23687	0.539449	0.45647	0.216798	-0.327088	0.390247	0.506323	0.164262	0.0850838	0.827711	0.214408	0.5796	0.104976	0.788099	0.376746	0.317582	0.0430947	0.912344	0.0658877	0.866259	0.0798153	0.838262	-0.24911	0.518033	0.0814025	0.835081	0.390738	0.298442	0.0793525	0.83919
CL21798.Contig2_DB	blue	0.504893	0.165655	-0.913325	0.000579419	0.782169	0.0127413	0.91214	0.00060689	-0.3623	0.337969	-0.35441	0.349368	0.624214	0.0723675	0.270359	0.481683	0.294952	0.441003	-0.270535	0.481387	0.512292	0.158522	-0.529715	0.142441	0.430074	0.247917	0.450085	0.224118	0.414599	0.267207	0.068971	0.860049	0.659269	0.0534114	0.0602991	0.877531	0.0957858	0.806353	0.393755	0.294394	0.192376	0.619981	0.148547	0.702892	0.539979	0.133436	-0.339359	0.37162
CL368.Contig2_DB	blue	0.539085	0.134206	-0.9479	0.000100983	0.709963	0.0321273	0.973015	1.03521e-05	-0.370487	0.326337	-0.388928	0.300883	0.638486	0.0642121	0.456268	0.217028	0.315483	0.40825	-0.487764	0.182861	0.555413	0.120544	-0.59033	0.0942251	0.197141	0.611169	0.523777	0.147809	0.508518	0.162137	0.178231	0.646386	0.699235	0.0360598	0.0099083	0.979817	0.00798545	0.983733	0.379141	0.314263	0.0109364	0.977723	0.258659	0.501566	0.421185	0.258904	-0.241704	0.53095
Unigene5176_DB	blue	0.544167	0.129861	-0.924072	0.000368504	0.720973	0.0283934	0.853163	0.00344969	-0.507528	0.163094	-0.322407	0.397464	0.784114	0.0123729	0.399163	0.287209	0.174116	0.654133	-0.115684	0.766942	0.491927	0.17859	-0.51911	0.15211	0.550384	0.12466	0.389386	0.300265	0.438483	0.237758	-0.0127023	0.974127	0.59829	0.088769	0.0263684	0.946314	0.239745	0.534388	0.31872	0.403191	0.0446085	0.909275	0.0723339	0.853284	0.610097	0.0810417	-0.105252	0.787552
CL7845.Contig1_DB	blue	0.555351	0.120594	-0.828443	0.00579716	0.785125	0.0121842	0.826036	0.00607176	-0.43115	0.246605	-0.497317	0.173145	0.469212	0.202591	0.491397	0.179131	0.648901	0.0586424	-0.367727	0.330236	0.411957	0.270577	-0.491739	0.178781	0.132949	0.733117	0.683258	0.0424741	0.367086	0.331144	0.282507	0.461397	0.507001	0.163604	0.226807	0.557305	0.197575	0.610367	0.26954	0.483065	0.265063	0.490642	0.0116866	0.976195	0.280809	0.46421	-0.228671	0.553981
CL24670.Contig1_DB	blue	0.641408	0.0626169	-0.843387	0.00427945	0.746795	0.0207801	0.843407	0.00427758	-0.415205	0.266438	-0.363212	0.336663	0.723222	0.0276676	0.499014	0.17145	0.583929	0.0987573	-0.345644	0.362248	0.43168	0.24596	-0.375023	0.31998	0.344433	0.364044	0.359275	0.342317	0.0800691	0.837754	0.0230008	0.953164	0.451613	0.222354	0.0822616	0.83336	0.0748317	0.848264	0.171291	0.659469	-0.329045	0.387247	0.189911	0.624556	0.358969	0.342759	-0.0636954	0.870679
CL12651.Contig2_DB	blue	-0.567818	0.110745	0.935988	0.000205166	-0.827981	0.00584917	-0.901991	0.000880718	0.424849	0.254344	0.545812	0.128472	-0.510391	0.160337	-0.416636	0.264625	-0.521388	0.150001	0.462476	0.210035	-0.380386	0.312544	0.585183	0.0978595	-0.155862	0.688839	-0.517583	0.153532	-0.300555	0.431953	-0.180524	0.642081	-0.626024	0.071299	-0.019226	0.960845	-0.0372719	0.924158	-0.224871	0.560764	-0.113333	0.771578	-0.235441	0.54197	-0.341392	0.368576	0.294689	0.44143
CL20842.Contig1_DB	blue	-0.57875	0.10252	0.972598	1.09186e-05	-0.672185	0.0473236	-0.853924	0.00339015	0.584724	0.0981877	0.621351	0.0740773	-0.62782	0.0702487	-0.464646	0.20762	-0.335446	0.377513	0.278784	0.467574	-0.307752	0.42045	0.643874	0.0612906	-0.265725	0.489518	-0.538298	0.134887	-0.412681	0.269652	0.0351192	0.928529	-0.626887	0.0707931	0.0897887	0.818308	-0.225349	0.559908	-0.141684	0.716149	-0.0461499	0.906151	-0.200066	0.60578	-0.42481	0.254394	0.101553	0.794888
CL681.Contig1_DB	blue	0.740534	0.0224838	-0.76765	0.0157264	0.831728	0.00543632	0.81974	0.00683154	-0.46507	0.20715	-0.176014	0.650556	0.792857	0.0108049	0.651223	0.0574437	0.521732	0.149685	-0.381987	0.310342	0.647036	0.0596161	-0.207211	0.592687	0.397524	0.289376	0.266236	0.488653	0.2496	0.517183	0.397751	0.289076	0.29004	0.449005	0.343433	0.365532	0.0624154	0.87326	0.204939	0.59684	-0.223993	0.562336	-0.0754851	0.846951	0.26575	0.489477	0.0852738	0.827331
[truncated: 13,536 more rows]
[truncated: 2 more columns]

## Sheet: CME Genes
Table S3-2. The core genes in cold co-expression network
GeneID	CME	CK-1	CK-2	CK-3	Cold-1	Cold-2	Cold-3	ReCold-1	ReCold-2	ReCold-3	GO-BiologicalProcess	GO-MolecularFunction	Go-CellularComponent
CL1251.Contig1_DB	blue	11.15	10.63	12.59	4849.58	5956.5	3847.43	88.68	124.78	105.64	-	-	-
[truncated: 2,630 more rows]

## Sheet: Drought
Table S3-3. Genes in drought co-expression network
[truncated: 14,347 more rows]
[truncated: 16 more columns]

## Sheet: DME Genes
Table S3-4. The core genes in drought co-expression network
[truncated: 3,526 more rows]
